# Supplementary material for: The ribosomal RNA m5C methyltransferase NSUN-1 modulates healthspan and oogenesis in Caenorhabditis elegans
Source: eLife journal article supplement (doi:10.7554/elife.56205), 2020-12-08
Supplement: fig1-data1 [file COBRA_quantification.xlsx]

## Sheet: COBRA
Condition	Replicate	Methylation [%]
RNAi control	1	57.105
nsun-1 RNAi	1	36.2053
nsun-5 RNAi	1	14.2851
JGG1	1	3.73666
RNAi control	2	66.6417
nsun-1 RNAi	2	48.8316
nsun-5 RNAi	2	15.5851
JGG1	2	3.5665
RNAi control	3	24.8827
nsun-1 RNAi	3	50.0452
nsun-5 RNAi	3	3.83957
JGG1	3	18.6037
