# Supplementary material for: The ribosomal RNA m5C methyltransferase NSUN-1 modulates healthspan and oogenesis in Caenorhabditis elegans
Source: eLife journal article supplement (doi:10.7554/elife.56205), 2020-12-08
Supplement: fig3-data1 [file brood_size_analysis.xlsx]

## Sheet: Sheet1
Replicate 1							Replicate 2							Replicate 3
control							control							control
Worm nr.	Day 1	Day 2	Day 3	Day 4	Total of eggs		Worm nr.	Day 1	Day 2	Day 3	Day 4	Total of eggs		Worm nr.	Day 1	Day 2	Day 3	Day 4	Total of eggs
A1	175	56	7	0	238		A1	223	26	10	0	259		A1	223	43	7	0	273
A2	231	15	0	0	246		A3	256	92	9	0	357		A2	157	55	2	0	214
A3	171	36	5	0	212		A4	232	25	5	0	262		A3	232	49	1	0	282
A5	195	26	2	0	223		A5	226	39	10	0	275		A4	227	31	1	0	259
B1	274	56	32	0	362		B1	309	45	18	0	372		A5	263	76	3	0	342
nsun-1							nsun-1							nsun-1
Worm nr.	Day 1	Day 2	Day 3	Day 4	Total of eggs		Worm nr.	Day 1	Day 2	Day 3	Day 4	Total of eggs		Worm nr.	Day 1	Day 2	Day 3	Day 4	Total of eggs
A1	93	19	0	0	112		A1	209	28	1	0	238		A1	105	27	8	0	140
A2	104	18	1	0	123		A2	151	34	0	0	185		A2	100	24	2	0	126
A3	117	32	0	0	149		A3	182	38	2	0	222		A3	135	18	2	0	155
A4	93	28	7	0	128		A4	169	35	20	0	224		A4	120	22	0	0	142
A5	117	16	0	0	133		A5	148	28	6	0	182		A5	148	13	1	0	162
nsun-5							nsun-5							nsun-5
Worm nr.	Day 1	Day 2	Day 3	Day 4	Total of eggs		Worm nr.	Day 1	Day 2	Day 3	Day 4	Total of eggs		Worm nr.	Day 1	Day 2	Day 3	Day 4	Total of eggs
A1	254	31	5	0	290		A1	216	26	0	0	242		A1	236	62	0	1	299
A2	188	60	0	0	248		A2	177	22	7	0	206		A2	221	25	56	0	302
A3	283	56	5	0	344		A3	257	75	7	0	339		A3	218	44	0	0	262
A4	195	84	8	0	287		A4	221	19	6	0	246		A4	227	33	7	0	267
A5	162	44	3	0	209		A5	258	47	6	0	311		A5	148	66	15	0	229
