# Supplementary material for: The ribosomal RNA m5C methyltransferase NSUN-1 modulates healthspan and oogenesis in Caenorhabditis elegans
Source: eLife journal article supplement (doi:10.7554/elife.56205), 2020-12-08
Supplement: fig3-data1 [file qPCRs_expression_development.xlsx]

## Sheet: Tabelle1
stage	nsun-1			nsun-2			nsun-4			nsun-5
	rep 1	rep 2	rep 3	rep 1	rep 2	rep 3	rep 1	rep 2	rep 3	rep 1	rep 2	rep 3
eggs	1	1	1	1	1	1	1	1	1	1	1	1
L1/L2	1.42579	1.54034	1.15652	2.06269	1.22494	1.30163	1.21753	4.0513	1.60427	1.20996	2.53629	3.27661
L3	1.85898	2.58608	1.72277	1.86157	2.45921	1.69852	2.62851	5.2686	2.46094	2.10489	3.77362	2.84012
L4	1.95362	3.63197	1.81198	1.27927	1.72259	1.85449	2.8528	6.23559	3.06556	1.18679	2.98147	4.469
adult	2.24383	2.72553	3.35375	2.18159	1.42678	2.9405	3.85962	6.10047	3.86357	1.68312	4.92474	3.81266
