# Supplementary material for: The ribosomal RNA m5C methyltransferase NSUN-1 modulates healthspan and oogenesis in Caenorhabditis elegans
Source: eLife journal article supplement (doi:10.7554/elife.56205), 2020-12-08
Supplement: fig3-data1 [file Worm_size.xlsx]

## Sheet: N2_rep1
HT115	Length [μm]	nsun-1	Length [μm]	nsun-5	Length [μm]
1	1375.78	1	984.097	1	1368.47
2	1209.06	2	940.916	2	1355.89
3	1284.33	3	914.203	3	1266.92
4	1329.1	4	1014.77	4	1312.39
5	1184.93	5	1033.39	5	1135.86
6	1252.36	6	928.849	6	1209.4
7	1199.93	7	1063.3	7	1302.14
8	1278.41	8	920.101	8	1207.5
9	1244.79	9	1040.78	9	1337.72
10	1300.23	10	1034.43	10	1212.46
11	1276.3	11	926.962	11	1221.73
12	1299.73	12	981.645	12	1298.59
13	1277.93	13	1131.06	13	1198.23
14	1265.9	14	970.63	14	1266.6
15	1296.84	15	1007.27	15	1208.54
16	1224.28	16	1004.88	16	1215.74
17	1227.86	17	928.421	17	1280.31
18	1367.62	18	856.776	18	1258
		19	1178.46
		20	996.739
		21	1048.65
		22	999.795
		23	1063.68
		24	1068.1
		25	1006.63

## Sheet: N2_rep2
HT115	Length [μm]	nsun-1	Length [μm]	nsun-5	Length [μm]
1	1056.1	1	612.346	1	888.397
2	1051.88	2	550.96	2	993.173
3	1088.25	3	625.562	3	983.918
4	1065.47	4	661.216	4	900.27
5	1073.65	5	701.307	5	1003.55
6	1166.69	6	768.703	6	924.448
7	981.346	7	663.143	7	897.127
8	1204.63	8	821.138	8	741.291
9	1056.76	9	738.718	9	947.757
10	1045.9	10	624.24	10	958.594
11	929.827	11	713.833	11	939.712
12	1048.09	12	881.65	12	956.736
13	1130.85	13	734.044	13	975.306
14	1124.42	14	837.221	14	1082.2
15	1134.84	15	718.098	15	974.501
16	1033.39	16	789.23	16	1133.92
17	1179.91	17	802.318	17	1292.43
18	1026.82	18	814.48	18	1074.03
		19	901.72	19	976.868
		20	578.172
		21	632.518
		22	859.725
		23	727.1
		24	762.333
		25	891.158

## Sheet: N2_rep3
HT115	Length [μm]	nsun-1	Length [μm]	nsun-5	Length [μm]
1	1012.37	1	903.756	1	903.657
2	1054.15	2	768.845	2	1096.08
3	1163.34	3	718.118	3	1260.24
4	1040.96	4	846.496	4	1101.37
5	1124.34	5	583.387	5	986.178
6	1105.66	6	567.384	6	1085.54
7	1136.91	7	905.926	7	989.091
8	1033.06	8	811.149	8	853.096
9	938.686	9	801.266	9	953.591
10	1029.04	10	783.781	10	920.504
11	1072.47	11	722.606	11	953.193
12	1196.94	12	831.536	12	930.46
13	976.645	13	749.528	13	1009.81
14	1115.07	14	885.465	14	729.395
15	1166.73	15	711.713	15	904.59
16	1105.11	16	623.98	16	924.281
17	1067.33	17	733.986	17	1003.11
18	1047.47	18	643.745	18	907.217
		19	775.403	19	914.873
		20	709.859
		21	609.656
		22	543.311
		23	605.522

## Sheet: NL2098_day1
HT115	Length [μm]	nsun-1	Length [μm]
1	1068.28	1	909.799
2	994.277	2	872.636
3	1062.73	3	1032.06
4	1055.54	4	932.016
5	930.79	5	917.719
6	1087.88	6	926.837
7	1086.88	7	984.35
8	962.191	8	1001.48
9	968.071	9	832.687
10	1050.25	10	815.297
11	957.942	11	913.578
12	1101.22	12	935.481
13	945.598	13	898.545
14	1093.23	14	834.107
15	1024.72	15	1088.97
16	1072.69	16	960.184
17	997.104	17	841.544
18	1033.79	18	795.403
19	996.923	19	1031.75
20	1039.86	20	895.228
21	956.675	21	846.866
22	950.795	22	862.019
23	1101.73	23	1003.26
24	961.154	24	880.187
25	1056.52	25	981.646
26	1142.27	26	911.235
27	1043.87	27	982.874
28	1026.41	28	944.156
29	1086.38	29	952.68
30	1106.09	30	989.758
31	1066.35	31	791.389
32	1064.44	32	1000.42
33	926.34	33	1021.12
34	1015.15	34	973.378
35	998.031	35	897.894
		36	932.753
		37	1008.12
		38	913.841
		39	863.787
		40	848.206
		41	812.29

## Sheet: NL2550_day1
HT115	Length [μm]	nsun-1	Length [μm]
1	1129.01	1	809.125
2	886.185	2	847.121
3	1075.43	3	749.27
4	1065.15	4	741.101
5	1083.55	5	802.49
6	1135.87	6	793.254
7	1006.93	7	858.611
8	1006.09	8	774.169
9	1024.09	9	760.4
10	1108.19	10	729.324
11	1147.29	11	720.631
12	1138.38	12	814.543
13	1089.58	13	851.38
14	925.598	14	852.167
15	1041.24	15	821.656
16	1172.45	16	794.829
17	955.557	17	740.898
18	1154.27	18	834.205
19	954.289	19	871.13
20	922.105	20	918.778
21	1062.77	21	794.841
22	924.838	22	875.76
23	1063.36	23	917.989
24	967.403	24	736.956
25	1033.35	25	848.573
26	971.21	26	804.396
27	1179.84	27	750.881
28	1088.49
29	970.463
30	1021.09
31	1047.15

## Sheet: NL2098_day2
HT115	Length [μm]	nsun-1	Length [μm]
1	1098.95	1	1006.6
2	1088.08	2	1006.7
3	1052.18	3	1254.14
4	1134.7	4	1150.83
5	1023.52	5	1048.76
6	1071.48	6	1098.54
7	1042.95	7	1333.49
8	1110.82	8	1210.53
9	1123.73	9	1148.22
10	1177.54	10	1081.36
11	1089.7	11	1138.6
12	1119.75	12	1102.24
13	886.624	13	1211.99
14	995.351	14	1079.42
15	1154.31	15	1141.53
16	1087.96	16	1067.44
17	1160.68	17	950.395
18	1063.72	18	1055
19	1101.12	19	1145.07
20	1107.57	20	1165.45
21	1081.71	21	1099.88
22	1047.7	22	995.587
23	1168.33	23	1080.82
24	1150.89	24	994.006
25	1071.74	25	1245.85
26	1140.23	26	1212.42
27	1123.79	27	1264.18
28	1124.18	28	1021.4

## Sheet: NL2550_day2
HT115	Length [μm]	nsun-1	Length [μm]
1	1153.27	1	1004.88
2	1202.24	2	965.516
3	1033.25	3	808.48
4	1148.86	4	1013.69
5	1113.24	5	915.522
6	961.779	6	871.88
7	1139.11	7	902.054
8	1082.24	8	1035.29
9	1217.28	9	906.422
10	1087.32	10	888.404
11	1085.42	11	887.994
12	878.27	12	853.961
13	976.757	13	939.19
14	1012.75	14	928.079
15	1079.92	15	1046.36
16	1084.6	16	914.814
17	1053.07	17	972.416
18	931.098	18	977.716
19	1093.04	19	984.701
20	1008.05	20	971.203
21	915.176	21	996.204
		22	798.341
		23	1048.76
		24	1085.97
		25	1003.44
		26	962.879
		27	806.509
		28	937.091
		29	904.049

## Sheet: NL2098_day3
HT115	Length [μm]	nsun-1	Length [μm]
1	1154.04	2	1259.93
2	1079.97	3	1137.27
3	1047.29	4	1220.93
4	1148.88	5	1239.19
5	1195.85	6	1308.57
6	1119.07	7	1377.83
7	1158.99	8	1203.92
8	1121.7	9	1211.56
9	1195.62	10	1381.96
10	1149.5	11	1223.31
11	1205.4	12	1180.97
12	1235.97	13	1238.72
13	1160.48	14	1222.18
14	1222.01	15	1207.59
15	1159.43	16	1220.74
16	1204.74	17	1368.81
17	1225.48	18	1300.95
18	1251.52	19	1169.14
19	1226.82	20	1187.19
20	1182	21	1246.37
21	1280.68	22	1182.02
22	1178.89	23	1391.77
23	1257.77	24	1264.16
24	1245.01	25	1287.92
25	1110.06	26	1284.12
26	1277.33	27	1282.1
27	1256.61	28	1308.15
28	1205.33	29	1248.48
29	1228.51	30	1251.41
		31	1276.81
		32	1240.86
		33	1296.79

## Sheet: NL2550_day3
HT115	Length [μm]	nsun-1	Length [μm]
1	1127.04	1	899.094
2	1165.35	2	1140.91
3	1228.41	3	1076.02
4	1219.93	4	992.143
5	1041.46	5	1026.61
6	1149.19	6	1042.5
7	1023.76	7	981.216
8	1101.17	8	1066.84
9	1115.2	9	933.553
10	1250.84	10	1082.13
11	1246.51	11	1098.23
12	1272.91	12	1048.81
13	1123.85	13	1034.06
14	1133.92	14	1156.57
15	1271.93	15	1042.64
16	1308.24	16	904.9
17	1234.36	17	989.712
18	1273.44	18	1004.25
19	1162.22	19	953.574
20	1210.73	20	1063.5
21	1145.59	21	858.287
22	1203.56	22	1044.25
23	1256.31	23	1143.63
24	1221.29	24	1109.39
25	1265.72	25	1104.12
26	1214.09	26	1094.02
		27	900.898
		28	1066.65
		29	1103.28
		30	1118.06
		31	1003.53
		32	1110.51
		33	1153.82
		34	1031.31
		35	1080.48
		36	1040.78
		37	1030.68
		38	1052.29
		39	1091.9
		40	1254.48
		41	1049.3

## Sheet: NL2098_NL2550_rep2
NL2550					NL2098
control		nsun-1			control		nsun-1
1	1189.83	1	973.07		1	1281.51	1	1308.85
2	1226.9	2	910.887		2	1188.6	2	1231.9
3	1195.89	3	960.9		3	1335.98	3	1089.17
4	1158.78	4	966.888		4	1149.31	4	1114.12
5	970.763	5	1129.15		5	1134.57	5	1171.78
6	1111.49	6	887.099		6	1095.17	6	1096.38
7	1153.21	7	948.364		7	963.513	7	1117.97
8	990.455	8	1036.24		8	1087.81	8	1102.02
9	1072.77	9	933.202		9	1089.2	9	1231.22
10	1234.56				10	1146.41	10	924.268
11	826.745				11	1005.02	11	992.92
					12	1198.38	12	1075.66
					13	1243.02	13	1037.24
							14	1189.73

[truncated: 1 more sheets: DCL569]
