# Supplementary material for: The ribosomal RNA m5C methyltransferase NSUN-1 modulates healthspan and oogenesis in Caenorhabditis elegans
Source: eLife journal article supplement (doi:10.7554/elife.56205), 2020-12-08
Supplement: fig5-data1 [file polysome_profiling_quantification.xlsx]

## Sheet: sheet 1
		60S	80S	polysomes
replicate 1	control	26.9457	28.661	44.5335
	nsun-1	20.7949	36.2535	42.6606
replicate 2	control	35.0665	18.9351	44.6934
	nsun-1	37.4946	22.8865	40.6409
replicate 3	control	30.8862	13.6254	55.1916
	nsun-1	31.008	12.099	57.5204
