# Supplementary material for: The ribosomal RNA m5C methyltransferase NSUN-1 modulates healthspan and oogenesis in Caenorhabditis elegans
Source: eLife journal article supplement (doi:10.7554/elife.56205), 2020-12-08
Supplement: fig5-data1 [file puromycin_quantification.xlsx]

## Sheet: Sheet1
Genotype	Replicate	Intensity
control	1	100
control	2	100
control	3	100
nsun-1	1	101
nsun-1	2	98
nsun-1	3	100
nsun-5	1	104
nsun-5	2	100
nsun-5	3	145
