# Supplementary material for: The ribosomal RNA m5C methyltransferase NSUN-1 modulates healthspan and oogenesis in Caenorhabditis elegans
Source: eLife journal article supplement (doi:10.7554/elife.56205), 2020-12-08
Supplement: fig7-data1 [file Cuticle_permeability.xlsx]

## Sheet: egg onset
replicate 1	nol-1	HT115								replicate 2	HT115	nol1					replicate 3	HT115	nol1
none	2	13								none	11	7					none	22	11
low	5	0								low	1	2					low	2	5
medium	1	0								medium	0	1					medium	0	1
high	5	0								high	2	3					high	0	3
∑	13	13								∑	14	13					∑	24	20
replicate 1	HT115	nol-1								replicate 2	HT115	nol1					replicate 2	HT115	nol1
none	100	15.3846								none	78.5714	53.8462					none	91.6667	55
low	0	38.4615								low	7.14286	15.3846					low	8.33333	25
medium	0	7.69231								medium	0	7.69231					medium	0	5
high	0	38.4615								high	14.2857	23.0769					high	0	15
∑	13	13								∑	14	13					∑	24	20

## Sheet: Summary
replicate 1				replicate 2				replicate 3
	control	nsun-1			control	nsun-1			control	nsun-1
none	13	2		none	11	7		none	22	11
low	0	5		low	1	2		low	2	5
medium	0	1		medium	0	1		medium	0	1
high	0	5		high	2	3		high	0	3
∑	13	13		∑	14	13		∑	24	20

## Sheet: like_RNA_seq
	nol-1	HT115
none	0	8
low	8	3
medium	2	3
high	3	1
∑	13	15

## Sheet: extruded gonad
	nol-1	HT115
none	3	5
low	4	3
medium	1	1
high	3	3
∑	11	12
