# Supplementary material for: The ribosomal RNA m5C methyltransferase NSUN-1 modulates healthspan and oogenesis in Caenorhabditis elegans
Source: eLife journal article supplement (doi:10.7554/elife.56205), 2020-12-08
Supplement: fig7-data1 [file Gonad_extrusion.xlsx]

## Sheet: Tabelle1
ID_worm	group	phenotype
1	control	healthy
2	control	healthy
3	control	healthy
4	control	healthy
5	control	healthy
6	control	healthy
7	control	healthy
8	control	healthy
9	control	healthy
10	control	healthy
11	control	healthy
12	control	healthy
13	control	healthy
14	control	healthy
15	control	healthy
16	control	healthy
17	control	healthy
18	control	healthy
19	control	healthy
20	control	healthy
21	control	healthy
22	control	healthy
23	control	healthy
24	control	healthy
25	control	healthy
26	control	healthy
27	control	healthy
28	control	healthy
29	control	healthy
30	control	healthy
31	control	healthy
32	control	healthy
33	control	healthy
34	control	healthy
35	control	healthy
36	control	healthy
37	control	healthy
38	control	healthy
39	control	healthy
40	control	healthy
41	control	healthy
42	control	healthy
43	control	healthy
44	control	healthy
45	control	healthy
46	control	healthy
47	control	healthy
48	control	healthy
49	control	healthy
50	control	healthy
1	nsun-1	healthy
2	nsun-1	healthy
3	nsun-1	healthy
4	nsun-1	healthy
5	nsun-1	healthy
6	nsun-1	healthy
7	nsun-1	healthy
8	nsun-1	healthy
9	nsun-1	healthy
10	nsun-1	healthy
11	nsun-1	healthy
12	nsun-1	healthy
13	nsun-1	healthy
14	nsun-1	healthy
15	nsun-1	healthy
16	nsun-1	healthy
17	nsun-1	healthy
18	nsun-1	healthy
19	nsun-1	healthy
20	nsun-1	healthy
21	nsun-1	healthy
22	nsun-1	healthy
23	nsun-1	healthy
24	nsun-1	healthy
25	nsun-1	healthy
26	nsun-1	healthy
27	nsun-1	healthy
28	nsun-1	healthy
29	nsun-1	healthy
30	nsun-1	healthy
31	nsun-1	healthy
32	nsun-1	healthy
33	nsun-1	healthy
34	nsun-1	healthy
35	nsun-1	healthy
36	nsun-1	healthy
37	nsun-1	healthy
38	nsun-1	healthy
39	nsun-1	healthy
40	nsun-1	healthy
41	nsun-1	healthy
42	nsun-1	healthy
43	nsun-1	healthy
44	nsun-1	healthy
45	nsun-1	healthy
46	nsun-1	healthy
47	nsun-1	healthy
48	nsun-1	healthy
49	nsun-1	healthy
50	nsun-1	healthy
51	nsun-1	healthy
52	nsun-1	healthy
53	nsun-1	healthy
54	nsun-1	healthy
55	nsun-1	healthy
56	nsun-1	healthy
57	nsun-1	healthy
58	nsun-1	healthy
59	nsun-1	healthy
60	nsun-1	healthy
61	nsun-1	healthy
62	nsun-1	healthy
63	nsun-1	healthy
64	nsun-1	healthy
65	nsun-1	healthy
66	nsun-1	healthy
67	nsun-1	healthy
68	nsun-1	healthy
69	nsun-1	healthy
70	nsun-1	healthy
71	nsun-1	healthy
72	nsun-1	healthy
73	nsun-1	healthy
74	nsun-1	healthy
75	nsun-1	healthy
76	nsun-1	healthy
77	nsun-1	healthy
78	nsun-1	healthy
79	nsun-1	healthy
80	nsun-1	healthy
81	nsun-1	healthy
82	nsun-1	healthy
83	nsun-1	healthy
84	nsun-1	healthy
85	nsun-1	healthy
86	nsun-1	healthy
1	nsun-1	mild
2	nsun-1	mild
3	nsun-1	mild
4	nsun-1	mild
5	nsun-1	mild
6	nsun-1	mild
7	nsun-1	mild
8	nsun-1	mild
9	nsun-1	mild
10	nsun-1	mild
11	nsun-1	mild
12	nsun-1	mild
13	nsun-1	mild
14	nsun-1	mild
15	nsun-1	mild
16	nsun-1	mild
17	nsun-1	mild
18	nsun-1	mild
19	nsun-1	mild
20	nsun-1	mild
21	nsun-1	mild
22	nsun-1	mild
23	nsun-1	mild
24	nsun-1	mild
25	nsun-1	mild
26	nsun-1	mild
27	nsun-1	mild
28	nsun-1	mild
29	nsun-1	mild
30	nsun-1	mild
31	nsun-1	mild
32	nsun-1	mild
33	nsun-1	mild
34	nsun-1	mild
35	nsun-1	mild
36	nsun-1	mild
37	nsun-1	mild
38	nsun-1	mild
39	nsun-1	mild
40	nsun-1	mild
41	nsun-1	mild
42	nsun-1	mild
43	nsun-1	mild
44	nsun-1	mild
45	nsun-1	mild
46	nsun-1	mild
47	nsun-1	mild
48	nsun-1	mild
49	nsun-1	mild
50	nsun-1	mild
51	nsun-1	mild
52	nsun-1	mild
53	nsun-1	mild
54	nsun-1	mild
55	nsun-1	mild
56	nsun-1	mild
57	nsun-1	mild
58	nsun-1	mild
59	nsun-1	mild
60	nsun-1	mild
61	nsun-1	mild
62	nsun-1	mild
63	nsun-1	mild
64	nsun-1	mild
65	nsun-1	mild
66	nsun-1	mild
67	nsun-1	mild
68	nsun-1	mild
69	nsun-1	mild
70	nsun-1	mild
71	nsun-1	mild
72	nsun-1	mild
73	nsun-1	mild
74	nsun-1	mild
75	nsun-1	mild
76	nsun-1	mild
77	nsun-1	mild
78	nsun-1	mild
79	nsun-1	mild
80	nsun-1	mild
81	nsun-1	mild
82	nsun-1	mild
1	nsun-1	severe
2	nsun-1	severe
3	nsun-1	severe
4	nsun-1	severe
5	nsun-1	severe
6	nsun-1	severe
7	nsun-1	severe
8	nsun-1	severe
9	nsun-1	severe
10	nsun-1	severe
11	nsun-1	severe
12	nsun-1	severe
13	nsun-1	severe
14	nsun-1	severe
15	nsun-1	severe
16	nsun-1	severe
17	nsun-1	severe
18	nsun-1	severe
19	nsun-1	severe
20	nsun-1	severe
21	nsun-1	severe
22	nsun-1	severe
23	nsun-1	severe
24	nsun-1	severe
25	nsun-1	severe
26	nsun-1	severe
27	nsun-1	severe
28	nsun-1	severe
29	nsun-1	severe
30	nsun-1	severe
31	nsun-1	severe
32	nsun-1	severe
33	nsun-1	severe
34	nsun-1	severe
35	nsun-1	severe
36	nsun-1	severe
37	nsun-1	severe
38	nsun-1	severe
39	nsun-1	severe
40	nsun-1	severe
41	nsun-1	severe
42	nsun-1	severe
43	nsun-1	severe
44	nsun-1	severe
45	nsun-1	severe
46	nsun-1	severe
47	nsun-1	severe
48	nsun-1	severe
49	nsun-1	severe
50	nsun-1	severe
51	nsun-1	severe
52	nsun-1	severe
1	nsun-5	healthy
2	nsun-5	healthy
3	nsun-5	healthy
4	nsun-5	healthy
5	nsun-5	healthy
6	nsun-5	healthy
7	nsun-5	healthy
8	nsun-5	healthy
9	nsun-5	healthy
10	nsun-5	healthy
11	nsun-5	healthy
12	nsun-5	healthy
13	nsun-5	healthy
14	nsun-5	healthy
15	nsun-5	healthy
16	nsun-5	healthy
17	nsun-5	healthy
18	nsun-5	healthy
19	nsun-5	healthy
20	nsun-5	healthy
21	nsun-5	healthy
22	nsun-5	healthy
23	nsun-5	healthy
24	nsun-5	healthy
25	nsun-5	healthy
26	nsun-5	healthy
27	nsun-5	healthy
28	nsun-5	healthy
29	nsun-5	healthy
30	nsun-5	healthy
31	nsun-5	healthy
32	nsun-5	healthy
33	nsun-5	healthy
34	nsun-5	healthy
35	nsun-5	healthy
36	nsun-5	healthy
37	nsun-5	healthy
38	nsun-5	healthy
39	nsun-5	healthy
40	nsun-5	healthy
41	nsun-5	healthy
42	nsun-5	healthy
43	nsun-5	healthy
44	nsun-5	healthy
45	nsun-5	healthy
46	nsun-5	healthy
47	nsun-5	healthy
48	nsun-5	healthy
49	nsun-5	healthy
50	nsun-5	healthy
