# Supplementary material for: The ribosomal RNA m5C methyltransferase NSUN-1 modulates healthspan and oogenesis in Caenorhabditis elegans
Source: eLife. 2020 Dec 8;9:e56205. doi: 10.7554/eLife.56205 (PMC7746234; doi:10.7554/eLife.56205)
Supplement: Figure 6—source data 1. — xlsx-file with raw data of the respective experiments. [file elife-56205-fig6-data1.xlsx]

## Sheet: nsun1up
Gene	Genotype	rep1	rep2	rep3
nspc-5	RNAi control	0.75	1.25	1
nspc-5	nsun-1 RNAi	6.5	13.25	12.75
nspc-7	RNAi control	0.9	1.18571	0.914286
nspc-7	nsun-1 RNAi	3.4	10.1286	5
C08F11.12	RNAi control	1.18265	0.801834	1.01551
C08F11.12	nsun-1 RNAi	4.03456	5.22144	4.70945
nspc-1	RNAi control	1.04211	1.16842	0.789474
nspc-1	nsun-1 RNAi	2.82632	7.08947	3.63158
Y45F10C.2	RNAi control	1.12813	0.95729	0.91458
Y45F10C.2	nsun-1 RNAi	3.39175	5.45066	4.07364
vit-5	RNAi control	0.817662	0.95363	1.22871
vit-5	nsun-1 RNAi	2.61628	7.14003	3.05066
R10E4.7	RNAi control	1.44118	0.882353	0.676471
R10E4.7	nsun-1 RNAi	4.58824	2.55882	3.35294
nspc-16	RNAi control	1.125	1.40156	0.473437
nspc-16	nsun-1 RNAi	2.85	5.0625	2.29688
nspc-13	RNAi control	1.16537	1.13208	0.702553
nspc-13	nsun-1 RNAi	2.41065	4.99778	2.33074

## Sheet: nsun1down
Gene	Genotype	rep1	rep2	rep3
col-94	RNAi control	1.47389	1.20296	0.323153
col-94	nsun-1 RNAi	0.00197044	0.00197044	0.0128079
F20D12.12	RNAi control	1.10092	1.07339	0.825688
F20D12.12	nsun-1 RNAi	0.0275229	0	0
fbxa-77	RNAi control	1.17073	1.46341	0.365854
fbxa-77	nsun-1 RNAi	0	0.0365854	0
cpg-7	RNAi control	1.57229	0.89759	0.53012
cpg-7	nsun-1 RNAi	0	0.0180723	0.0361446
psf-2	RNAi control	0.964286	0.662946	1.37277
psf-2	nsun-1 RNAi	0.0133929	0	0.0602679
K08D8.11	RNAi control	0.40678	2.05932	0.533898
K08D8.11	nsun-1 RNAi	0	0.152542	0
hpo-21	RNAi control	1.09558	0.947791	0.956627
hpo-21	nsun-1 RNAi	0.0425703	0.0706827	0.0819277
C31H2.14	RNAi control	0.927835	1.39175	0.680412
C31H2.14	nsun-1 RNAi	0.0618557	0.0618557	0.0618557
Y54E10BL.3	RNAi control	1.33333	1.13889	0.527778
Y54E10BL.3	nsun-1 RNAi	0.138889	0	0.0555556
F53B7.7	RNAi control	1.5	1.21429	0.285714
F53B7.7	nsun-1 RNAi	0.0714286	0.142857	0.0357143

## Sheet: nsun5up
Gene	Genotype	rep1	rep2	rep3
nspc-5	N2	0.545152	1.25911	1.19574
nspc-5	JGG1	1.14224	4.30627	2.93981
nspc-7	N2	0.885348	0.943529	1.17112
nspc-7	JGG1	1.4918	3.05059	2.03022
C08F11.12	N2	1.4327	1.25904	0.308259
C08F11.12	JGG1	1.75753	3.39757	0.925067
nspc-1	N2	0.889701	1.08718	1.02311
nspc-1	JGG1	1.53884	2.34	1.94361
Y45F10C.2	N2	1.33812	1.29619	0.365698
Y45F10C.2	JGG1	2.06057	2.07908	0.971307
vit-5	N2	1.19804	1.16765	0.634317
vit-5	JGG1	1.49834	1.07844	0.938082
R10E4.7	N2	1.11531	0.74756	1.13713
R10E4.7	JGG1	0.262115	1.23357	1.71392
nspc-16	N2	1.73019	0.790024	0.479787
nspc-16	JGG1	0.966758	0.845982	0.608966
nspc-13	N2	1.80822	0.728957	0.462827
nspc-13	JGG1	0.898194	0.589174

## Sheet: nsun5down
Gene	Genotype	rep1	rep2	rep3
col-94	N2	0.462794	1.20012	1.33708
col-94	JGG1	0.90191	1.77299	1.4223
F20D12.12	N2	1.6881	0.565095	0.746808
F20D12.12	JGG1	1.76883	0.541819	1.251
fbxa-77	N2	0.723639	1.14877	1.12759
fbxa-77	JGG1	0.885958	1.22164	1.55377
cpg-7	N2	0.527128	0.825422	1.64745
cpg-7	JGG1	0.700413	0.936212	0.830545
psf-2	N2	1.61039	0.540243	0.849372
psf-2	JGG1	1.6088	1.08059	0.918895
K08D8.11	N2	0.64798	1.72472	0.627305
K08D8.11	JGG1	0.463284	0.476004	0.682394
hpo-21	N2	1.40269	0.933838	0.663473
hpo-21	JGG1	0.915993	0.807413	0.749209
C31H2.14	N2	0.455614	1.81598	0.728404
C31H2.14	JGG1	0.804434	0.383018	0.404267
Y54E10BL.3	N2	0.977625	0.902812	1.11956
Y54E10BL.3	JGG1	1.75327	1.44657	2.26426
F53B7.7	N2	1.07036	0.972373	0.957268
F53B7.7	JGG1	1.12993	0.742157	0.844719
