# Supplementary material for: The ribosomal RNA m5C methyltransferase NSUN-1 modulates healthspan and oogenesis in Caenorhabditis elegans
Source: eLife. 2020 Dec 8;9:e56205. doi: 10.7554/eLife.56205 (PMC7746234; doi:10.7554/eLife.56205)
Supplement: Source data 1. — RNAi xlsx-file containing RNA-seq analysis results for the comparison between RNAi control and nsun-1 RNAi of total mRNAs (sheet 1) and polysomal mRNAs (sheet 2). [file elife-56205-data1.xlsx]

## Sheet: nsun-1 vs. control total RNA
wormbase_ID	gene_name	baseMean	log2FoldChange	lfcSE	stat	pvalue	padj	description
WBGene00000669	col-94	494.082	-7.003	0.655295	-10.6868	1.17361e-26	2.18832e-22	COLlagen [Source:UniProtKB/TrEMBL;Acc:Q9U349]
WBGene00009287	psf-2	112.877	-4.82238	0.545646	-8.83792	9.75192e-19	9.09172e-15	Probable DNA replication complex GINS protein PSF2 [Source:UniProtKB/Swiss-Prot;Acc:O62193]
WBGene00012550	hpo-21	896.792	-3.06525	0.352979	-8.68394	3.82275e-18	2.37597e-14	Probable signal peptidase complex subunit 2 [Source:UniProtKB/Swiss-Prot;Acc:Q9XWW1]
WBGene00023401		67.1113	-5.89574	0.723047	-8.15402	3.5202e-16	1.64094e-12
WBGene00220163	Y47D3A.35	219.575	-2.21405	0.27256	-8.12318	4.54126e-16	1.69353e-12
WBGene00007459	C08F11.12	876.617	2.58309	0.330794	7.80876	5.77546e-15	1.79482e-11	UPF0375 protein C08F11.12 [Source:UniProtKB/Swiss-Prot;Acc:Q9U3R0]
WBGene00015392	nspc-7	140.546	2.26857	0.307855	7.36896	1.71964e-13	4.58064e-10	Nematode Specific Peptide family, group C [Source:UniProtKB/TrEMBL;Acc:Q8WQG6]
WBGene00014108	ZK856.7	1006.72	-1.67524	0.24151	-6.93653	4.01856e-12	9.36625e-09
WBGene00010723	cpg-7	85.1828	-6.88483	1.10739	-6.21718	5.06166e-10	1.04866e-06	Chondroitin proteoglycan 7 [Source:UniProtKB/Swiss-Prot;Acc:Q7YWX9]
WBGene00013121	spe-38	40.5829	2.00437	0.325418	6.15938	7.30315e-10	1.36175e-06
WBGene00008357	nspc-16	274.427	1.54048	0.250945	6.13873	8.31862e-10	1.41008e-06	Nematode Specific Peptide family, group C [Source:UniProtKB/TrEMBL;Acc:G5ECP8]
WBGene00009637	nspc-13	425.59	1.71999	0.280866	6.12386	9.13326e-10	1.41916e-06	Nematode Specific Peptide family, group C [Source:UniProtKB/TrEMBL;Acc:G5EF55]
WBGene00023263		26.1261	-3.53777	0.596593	-5.92995	3.03023e-09	4.18928e-06
WBGene00023477	nspc-1	104.698	2.12541	0.358791	5.92382	3.14544e-09	4.18928e-06	Nematode Specific Peptide family, group C [Source:UniProtKB/TrEMBL;Acc:Q65ZI6]
WBGene00012878	Y45F10C.2	1165.74	2.00992	0.344241	5.8387	5.26097e-09	6.53974e-06	UPF0375 protein Y45F10C.2 [Source:UniProtKB/Swiss-Prot;Acc:O45941]
WBGene00007870	C32H11.7	23.0253	-4.70355	0.822027	-5.72189	1.05344e-08	1.22765e-05
WBGene00219908	F20C5.10	377.591	1.53066	0.269608	5.67738	1.36775e-08	1.50018e-05	NA
WBGene00009640	nspc-10	1175.79	1.42989	0.271406	5.26846	1.37575e-07	0.000142512	Nematode Specific Peptide family, group C [Source:UniProtKB/TrEMBL;Acc:Q8I4J0]
WBGene00010538	ttr-3	53.4542	-2.4337	0.463091	-5.25534	1.4775e-07	0.000144997	Transthyretin-like protein 3 [Source:UniProtKB/Swiss-Prot;Acc:P34499]
WBGene00219859	C49F5.11	27.9836	-2.98947	0.589806	-5.06857	4.00811e-07	0.000373676	NA
WBGene00044412	F40H6.6	73.7279	1.51026	0.300292	5.02932	4.92229e-07	0.000437052
WBGene00011203	R10E4.7	103.184	1.95914	0.398944	4.91082	9.06978e-07	0.000768705
WBGene00017054	gstk-2	160.609	1.15229	0.237362	4.85455	1.20657e-06	0.000978165	Glutathione s-transferase kappa 2 [Source:UniProtKB/Swiss-Prot;Acc:Q18973]
WBGene00017498	pud-4	2796.8	2.89683	0.602912	4.80473	1.54957e-06	0.00120389	Protein Up-regulated in Daf-2(Gf) [Source:UniProtKB/TrEMBL;Acc:M1ZMJ3]
WBGene00010958	ndfl-4	226.658	3.42474	0.727746	4.70595	2.52687e-06	0.00188464	NADH-ubiquinone oxidoreductase chain 4L [Source:UniProtKB/Swiss-Prot;Acc:P24886]
WBGene00010957	nduo-6	1902.24	3.02437	0.655082	4.61678	3.89735e-06	0.002795	NADH-ubiquinone oxidoreductase chain 6 [Source:UniProtKB/Swiss-Prot;Acc:P24885]
WBGene00010617	K07A1.13	388.064	1.27291	0.277297	4.59043	4.42337e-06	0.00305475
WBGene00004622	rrn-3.1	103475	3.19569	0.703229	4.54431	5.51168e-06	0.00342569
WBGene00008664	nubp-1	5728.91	1.36125	0.298996	4.55275	5.29492e-06	0.00342569	Cytosolic Fe-S cluster assembly factor NUBP1 homolog [Source:UniProtKB/Swiss-Prot;Acc:Q93459]
WBGene00220004	K03E5.9	60.6197	-1.93046	0.42447	-4.54794	5.41728e-06	0.00342569	NA
WBGene00009935	F52E10.4	79.1895	-1.61276	0.35569	-4.53417	5.78304e-06	0.00347841
WBGene00194649	Y57G11C.1130	88.2685	1.54261	0.341458	4.51771	6.25115e-06	0.00364247
WBGene00005552	sri-40	262.872	1.94924	0.436178	4.4689	7.86216e-06	0.00444236	Serpentine Receptor, class I [Source:UniProtKB/TrEMBL;Acc:Q9N549]
WBGene00219886	F09E10.15	36.5838	-2.13207	0.478777	-4.45315	8.46179e-06	0.00464055	NA
WBGene00015890	C17C3.5	108.557	2.96179	0.666961	4.44072	8.96567e-06	0.0047764
WBGene00219838	C28H8.14	195.434	-1.60371	0.364802	-4.3961	1.10211e-05	0.00570832	NA
WBGene00007315	C04H5.7	2104.59	1.75047	0.404473	4.32779	1.50615e-05	0.00702091
WBGene00010131	F55H2.5	1140.29	1.22439	0.282855	4.32867	1.50012e-05	0.00702091	Putative cytochrome b561 [Source:UniProtKB/Swiss-Prot;Acc:P34465]
WBGene00011745	sre-4	188.774	1.53617	0.354797	4.32971	1.49303e-05	0.00702091	Serpentine Receptor, class E (Epsilon) [Source:UniProtKB/TrEMBL;Acc:Q94048]
WBGene00220030	M03F4.13	13.8422	-5.60479	1.29059	-4.3428	1.40675e-05	0.00702091	NA
WBGene00004567	rrn-2.1	212.497	2.91266	0.678301	4.29405	1.75442e-05	0.00788364
WBGene00011611	T08D2.6	73.9694	1.66325	0.387581	4.29136	1.77578e-05	0.00788364
WBGene00017539	F17E9.2	340.836	1.28144	0.300352	4.26647	1.98591e-05	0.00861146
WBGene00012212	W02D9.6	1333.66	1.75251	0.41306	4.24275	2.208e-05	0.00935691
WBGene00018817	F54D12.4	258.726	1.27648	0.303841	4.20115	2.65562e-05	0.0108843
WBGene00220178	Y52D3.2	229.979	0.989723	0.235724	4.19865	2.68517e-05	0.0108843
WBGene00011583	T07D10.3	49.2644	1.41918	0.339644	4.17842	2.93539e-05	0.0116454
WBGene00195186	F19G12.10	16.4238	-2.35111	0.563476	-4.1725	3.0127e-05	0.0117031
WBGene00003731	nhx-3	158.667	-1.37272	0.329796	-4.16234	3.1501e-05	0.0117473	Probable Na(+)/H(+) antiporter nhx-3 [Source:UniProtKB/Swiss-Prot;Acc:O16452]
WBGene00020200	T04A6.1	507.973	1.03358	0.248153	4.16508	3.11248e-05	0.0117473
WBGene00008356	nspc-20	1017.96	1.43355	0.345963	4.14364	3.41837e-05	0.0124286	Nematode Specific Peptide family, group C [Source:UniProtKB/TrEMBL;Acc:G5ECP8]
WBGene00013954	ZK262.9	13.8727	3.18331	0.769946	4.13446	3.55794e-05	0.0124286
WBGene00044340	nspc-5	14.3934	2.68986	0.650663	4.13403	3.5645e-05	0.0124286	Nematode Specific Peptide family, group C [Source:UniProtKB/TrEMBL;Acc:G5EDF2]
WBGene00189978	B0250.14	7.03583	3.67693	0.889911	4.1318	3.59941e-05	0.0124286
WBGene00022440	Y110A2AL.3	246.069	1.41315	0.343034	4.11956	3.79593e-05	0.0128689
WBGene00195016	ZC155.8	14.8471	3.03635	0.738379	4.11218	3.9194e-05	0.0130502
WBGene00021299	Y27F2A.8	199.699	1.60804	0.391795	4.10428	4.05584e-05	0.0131314
WBGene00044638	F23A7.8	782.88	2.54399	0.620085	4.10264	4.08463e-05	0.0131314
WBGene00008360	nspc-19	171.296	1.66858	0.410744	4.06234	4.85832e-05	0.0153539	Nematode Specific Peptide family, group C [Source:UniProtKB/TrEMBL;Acc:G5ECN6]
WBGene00012179	W01D2.1	17181.3	1.98187	0.490479	4.04068	5.32961e-05	0.0162911	Ribosomal protein L37 [Source:UniProtKB/TrEMBL;Acc:O62388]
WBGene00017501	pud-3	4737.28	2.16441	0.535154	4.04446	5.2443e-05	0.0162911	5C820; Protein Up-regulated in Daf-2(Gf) [Source:UniProtKB/TrEMBL;Acc:G5EEV5]
WBGene00195017	R144.15	23.0312	3.46269	0.859769	4.02747	5.63804e-05	0.016956
WBGene00006038	ssp-9	12.0417	6.24907	1.56811	3.98511	6.74501e-05	0.0190557	Sperm-specific class P protein 9/11 [Source:UniProtKB/Swiss-Prot;Acc:Q23058]
WBGene00013702	Y106G6D.6	240.457	1.21364	0.304042	3.9917	6.56006e-05	0.0190557
WBGene00077439	F55B12.10	28.0034	-2.05761	0.516306	-3.98525	6.74097e-05	0.0190557
WBGene00194861	H04D03.6	89.3094	1.63191	0.409303	3.98706	6.68971e-05	0.0190557
WBGene00017446	F14B8.4	167.617	1.16244	0.293089	3.96618	7.30334e-05	0.0203251
WBGene00235094	K08D9.9	429.688	1.67676	0.423565	3.95867	7.53675e-05	0.0206662
WBGene00045271	F07G6.10	58.3388	-2.15882	0.546543	-3.94996	7.81647e-05	0.0211226
WBGene00004451	rpl-37	640.88	1.99754	0.508565	3.9278	8.57252e-05	0.0225218	60S ribosomal protein L37 [Source:UniProtKB/Swiss-Prot;Acc:P49622]
WBGene00009634	nspc-9	891.169	1.07091	0.272654	3.92771	8.57584e-05	0.0225218	Nematode Specific Peptide family, group C [Source:UniProtKB/TrEMBL;Acc:Q20345]
WBGene00003726	nhr-136	179.515	-0.924604	0.235855	-3.92022	8.84697e-05	0.0225973	Nuclear hormone receptor family member nhr-136 [Source:UniProtKB/Swiss-Prot;Acc:O01930]
WBGene00007271	C03C10.5	45.2332	-2.18683	0.557552	-3.9222	8.77452e-05	0.0225973
WBGene00021345	Y37B11A.3	77.6087	1.81055	0.463188	3.90889	9.27199e-05	0.0233629
WBGene00010613	K07A1.6	2359.87	1.52442	0.390337	3.90538	9.40766e-05	0.0233887
WBGene00009335	F32D8.13	22.3739	-2.08191	0.536876	-3.87782	0.000105396	0.0255224
WBGene00019120	npl-4.1	733.256	0.883518	0.227747	3.87938	0.000104723	0.0255224	NPL (Yeast Nuclear Protein Localization) homolog [Source:UniProtKB/TrEMBL;Acc:H2KYU6]
WBGene00220246	ZK858.10	453.032	-1.11303	0.287311	-3.87396	0.000107082	0.0255981
WBGene00220118	W03D8.13	90.4239	-1.4956	0.390015	-3.83472	0.000125705	0.0296697
WBGene00167714	21ur-15004	8.93375	-5.36931	1.40835	-3.81249	0.000137571	0.0320644	NA
WBGene00000713	col-140	16531.1	1.84416	0.485473	3.79869	0.000145462	0.0334573	COLlagen [Source:UniProtKB/TrEMBL;Acc:Q19813]
WBGene00009069	F23A7.4	534.93	2.28738	0.602598	3.79585	0.000147136	0.0334573
WBGene00021136	W10G11.3	85.1396	1.60261	0.423925	3.78042	0.000156563	0.0351719
WBGene00044472	dct-8	548.029	5.23964	1.38751	3.77629	0.000159184	0.035335	DAF-16/FOXO Controlled, germline Tumor affecting [Source:UniProtKB/TrEMBL;Acc:Q4R116]
WBGene00010032	F54B11.9	81.3824	-1.86462	0.494534	-3.77045	0.000162953	0.0357461
WBGene00219985	F58D5.13	169.735	0.928027	0.246525	3.76444	0.000166923	0.0361913	NA
WBGene00001960	hlh-16	57.1081	-1.73162	0.461072	-3.75564	0.0001729	0.0370563	Helix Loop Helix [Source:UniProtKB/TrEMBL;Acc:O45320]
WBGene00000757	col-184	15017.3	1.77205	0.472964	3.74669	0.000179185	0.0375403	COLlagen [Source:UniProtKB/TrEMBL;Acc:Q19470]
WBGene00016658	C45B2.1	928.285	1.5217	0.406129	3.74683	0.000179081	0.0375403
WBGene00013078	ttr-25	1638.69	1.16995	0.31461	3.71873	0.000200228	0.0414827	TransThyretin-Related family domain [Source:UniProtKB/TrEMBL;Acc:F3Y5P3]
WBGene00022497	Y119D3B.21	14238.3	1.31523	0.354238	3.71285	0.000204939	0.0419923
WBGene00000680	col-106	22983.3	1.89004	0.509835	3.70716	0.000209597	0.0424799	COLlagen [Source:UniProtKB/TrEMBL;Acc:Q8MXT6]
WBGene00044471	F56D6.9	823.489	5.02147	1.35597	3.70321	0.000212884	0.0426822
WBGene00021493	Y40B10A.9	336.877	0.872435	0.235875	3.69872	0.000216687	0.0429825
WBGene00007260	olrn-1	473.605	-0.631774	0.17132	-3.68768	0.000226304	0.0431942
WBGene00007765	C27B7.9	2278.48	1.43074	0.387596	3.69131	0.000223105	0.0431942
WBGene00012683	asp-17	1131.73	2.06833	0.560999	3.68688	0.000227021	0.0431942	ASpartyl Protease [Source:UniProtKB/TrEMBL;Acc:Q8MYN5]
WBGene00017713	F22E5.20	202.563	1.5202	0.412117	3.68876	0.000225351	0.0431942
WBGene00001131	dys-1	1848.75	-0.695246	0.189307	-3.67258	0.000240113	0.0434772	Dystrophin-1 [Source:UniProtKB/Swiss-Prot;Acc:Q9TW65]
WBGene00014955	Y102A5C.6	1660.71	1.30228	0.354039	3.67835	0.000234748	0.0434772
WBGene00015359	C02G6.1	42.8517	-1.52686	0.416033	-3.67005	0.000242499	0.0434772
WBGene00017069	timm-17B.2	364.69	1.49045	0.405037	3.67979	0.00023343	0.0434772	Translocase, Inner Mitochondrial Membrane [Source:UniProtKB/TrEMBL;Acc:Q19012]
WBGene00195757	T06A10.105	4.08915	-5.35802	1.45906	-3.67225	0.000240427	0.0434772	NA
WBGene00220189	Y65B4A.11	651.671	1.62001	0.441087	3.67276	0.000239944	0.0434772
WBGene00007367	nhr-150	55.2857	-1.29616	0.353798	-3.66355	0.000248741	0.0436149	Nuclear hormone receptor family member nhr-150 [Source:UniProtKB/Swiss-Prot;Acc:O17573]
WBGene00009426	F35E12.2	126.882	1.25861	0.343348	3.66568	0.000246682	0.0436149
WBGene00022484	fbxa-77	13.4456	-3.49613	0.954712	-3.66197	0.000250284	0.0436149	F-box A protein [Source:UniProtKB/TrEMBL;Acc:Q95Y63]
WBGene00017473	F14H12.6	94.308	1.25894	0.345152	3.64749	0.000264818	0.0457203
WBGene00007819	C30F2.5	118.279	-0.947809	0.261033	-3.63099	0.000282339	0.0482981
WBGene00022783	tomm-7	1117.91	2.16275	0.596817	3.62381	0.000290294	0.0492074	Mitochondrial import receptor subunit TOM7 homolog [Source:UniProtKB/Swiss-Prot;Acc:P34660]
WBGene00007458	ule-4	27125.7	1.0589	0.292741	3.61719	0.000297816	0.0493046	UPF0375 protein ule-4 [Source:UniProtKB/Swiss-Prot;Acc:O62053]
WBGene00022445	Y110A2AL.9	564.233	1.29003	0.356431	3.61929	0.000295409	0.0493046
WBGene00206484	C31H2.14	15.7522	-3.42513	0.947127	-3.61634	0.0002988	0.0493046
WBGene00001921	his-47	7.51772	3.49068	0.969127	3.60188	0.000315927	0.0516734	Histone H2A [Source:UniProtKB/Swiss-Prot;Acc:P09588]
WBGene00008234	C50F4.9	200.303	0.897548	0.250351	3.58516	0.000336875	0.0542306
WBGene00009130	F25H5.8	1082.8	1.14493	0.319388	3.58477	0.000337378	0.0542306
WBGene00017509	F16B4.7	27.1152	2.38224	0.665394	3.58019	0.000343341	0.0547174
WBGene00017105	E02H9.7	342.47	2.28729	0.639888	3.57451	0.000350878	0.0554447
WBGene00021305	zig-11	4239.02	1.00355	0.280941	3.57212	0.000354109	0.0554849	2 (Zwei) IG domain protein [Source:UniProtKB/TrEMBL;Acc:Q9BPN5]
WBGene00013551	Y75B8A.16	1843.48	1.12885	0.316305	3.56886	0.000358532	0.05571
WBGene00022410	Y97E10C.1	920.146	-1.27102	0.35725	-3.55779	0.000373995	0.0576322
WBGene00000974	dhs-11	1803.04	1.62577	0.457876	3.55067	0.000384251	0.0584023	DeHydrogenases, Short chain [Source:UniProtKB/TrEMBL;Acc:A0A168H2Z9]
WBGene00013362	algn-7	344.702	1.35937	0.382924	3.54998	0.000385256	0.0584023	Asparagine Linked Glycosylation (ALG) homolog, Nematode [Source:UniProtKB/TrEMBL;Acc:Q9U1Z2]
WBGene00021521	nhr-287	8.39955	3.46885	0.978846	3.54382	0.000394372	0.0593022	Nuclear Hormone Receptor family [Source:UniProtKB/TrEMBL;Acc:Q95Y08]
WBGene00000609	col-20	5157.86	1.54921	0.438312	3.53449	0.000408557	0.0595022	COLlagen [Source:UniProtKB/TrEMBL;Acc:P91249]
WBGene00000754	col-181	26627	1.59973	0.452385	3.53622	0.00040589	0.0595022	COLlagen [Source:UniProtKB/TrEMBL;Acc:Q23150]
WBGene00016551	C40A11.8	45.7798	1.35732	0.383664	3.53779	0.000403496	0.0595022
WBGene00017730	F22H10.6	576.738	1.2335	0.349186	3.53249	0.000411659	0.0595022
WBGene00021073	nsun-1	4631.38	-1.15337	0.32587	-3.53936	0.000401095	0.0595022	NucleOLar protein [Source:UniProtKB/TrEMBL;Acc:A0A0M7RDQ9]
WBGene00022820	ZK813.1	15005.8	1.13988	0.325116	3.50607	0.000454781	0.0649749
WBGene00045048	D1007.19	50.9832	1.11269	0.317451	3.50507	0.00045649	0.0649749
WBGene00009486	F36G9.7	26.0596	2.17829	0.622277	3.50051	0.000464364	0.0655949
WBGene00003474	mtl-2	1731.7	1.66707	0.477067	3.49442	0.000475097	0.0666064	Metallothionein-2 [Source:UniProtKB/Swiss-Prot;Acc:P17512]
WBGene00015014	bath-24	253.593	0.891885	0.255644	3.48878	0.000485223	0.0675185	BTB and MATH domain containing [Source:UniProtKB/TrEMBL;Acc:O16566]
WBGene00003429	msp-31	145.66	4.94415	1.42144	3.47826	0.000504678	0.0697053	Major sperm protein 19/31/40/45/50/51/53/59/61/65/81/113/142 [Source:UniProtKB/Swiss-Prot;Acc:P53017]
WBGene00044256	Y45F10C.6	76.1212	1.55024	0.446127	3.47489	0.000511061	0.070068
WBGene00008560	pho-13	242.549	-1.22655	0.353221	-3.47247	0.000515684	0.0701857	Intestinal acid PHOsphatase [Source:UniProtKB/TrEMBL;Acc:Q19175]
WBGene00044665	F59A6.12	678.587	1.60703	0.464076	3.46286	0.000534465	0.0722147
WBGene00000202	exos-4.2	1775.59	1.12473	0.325668	3.45361	0.000553138	0.0736701	EXOSome (Multiexonuclease complex) component [Source:UniProtKB/TrEMBL;Acc:Q9N4P9]
WBGene00016745	C48B6.9	547.69	1.28756	0.372806	3.4537	0.000552957	0.0736701
WBGene00012211	ssp-37	476.525	1.2241	0.354714	3.45095	0.000558617	0.0738721	Sperm Specific family, class P [Source:UniProtKB/TrEMBL;Acc:Q9XVH1]
WBGene00000696	col-122	29915.6	1.48673	0.431728	3.44368	0.000573864	0.0752374	COLlagen [Source:UniProtKB/TrEMBL;Acc:Q22183]
WBGene00235163	Y108G3AL.10	39.399	2.02354	0.587863	3.4422	0.000577011	0.0752374
WBGene00017041	D2007.1	1371.92	1.11574	0.324628	3.43697	0.000588251	0.0752794
WBGene00017540	F17E9.3	124.961	1.5407	0.448267	3.437	0.000588193	0.0752794
WBGene00021667	snpc-3.2	61.1587	1.24416	0.362052	3.43643	0.000589445	0.0752794	SNAPc (Small Nuclear RNA Activating Complex) homolog [Source:UniProtKB/TrEMBL;Acc:Q965U6]
WBGene00003356	mir-262	15.5549	1.67148	0.48731	3.43002	0.000603528	0.0762757
WBGene00012185	W01F3.2	2198.47	1.27021	0.370414	3.42917	0.000605427	0.0762757
WBGene00235270	F59E12.16	41.1022	1.2778	0.372947	3.42622	0.000612035	0.0765906
WBGene00011763	T14B1.1	954.605	-1.07793	0.315855	-3.41272	0.000643179	0.0795552
WBGene00021135	W10G11.2	138.439	1.43312	0.42024	3.41025	0.000649037	0.0795552
WBGene00044479	F15E6.10	59.7125	3.59351	1.05422	3.40868	0.000652791	0.0795552
WBGene00194674	F23D12.11	2802.03	2.12987	0.624603	3.40997	0.00064971	0.0795552
WBGene00010337	F59F4.2	3371.53	1.57277	0.461708	3.40642	0.000658216	0.0796954
WBGene00015055	pitr-3	391.781	1.17359	0.344849	3.4032	0.000666014	0.0801194	Phosphate transporter [Source:UniProtKB/TrEMBL;Acc:Q17455]
WBGene00013867	ZC373.2	19563.5	1.28939	0.380113	3.39212	0.000693553	0.0828974
WBGene00007299	C04F12.5	787.311	1.17023	0.345727	3.38484	0.000712207	0.0845848
WBGene00009879	F49C12.10	156.822	0.959864	0.284027	3.37948	0.000726243	0.0846345
WBGene00044167	C36A4.11	25.5916	1.4363	0.424641	3.3824	0.00071856	0.0846345
WBGene00045270	C04E7.5	28.4861	1.88506	0.557725	3.3799	0.000725118	0.0846345
WBGene00000782	cpr-2	322.89	4.38733	1.30055	3.37345	0.000742332	0.0859722	Cysteine PRotease related [Source:UniProtKB/TrEMBL;Acc:O45466]
WBGene00012560	Y37D8A.25	563.499	1.21711	0.362054	3.36167	0.000774729	0.0891703
WBGene00011957	T23F11.6	611.744	0.904423	0.269329	3.35806	0.000784928	0.08979
WBGene00005000	spp-15	1036.18	-0.849658	0.253463	-3.3522	0.000801722	0.0911519	SaPosin-like Protein family [Source:UniProtKB/TrEMBL;Acc:Q9BIC4]
WBGene00009113	maph-1.2	2181.75	1.21862	0.363786	3.34984	0.000808589	0.0913727	Microtubule-Associated Protein Homolog [Source:UniProtKB/TrEMBL;Acc:A9UJN7]
WBGene00018153	F37C12.10	425.1	1.63142	0.487257	3.34817	0.000813465	0.0913727
WBGene00009219	dpm-3	1296.13	1.95182	0.583757	3.34355	0.000827145	0.092353	Probable dolichol-phosphate mannosyltransferase subunit 3 [Source:UniProtKB/Swiss-Prot;Acc:Q9XVV5]
WBGene00017149	EGAP4.1	202.5	-1.47886	0.443147	-3.33718	0.000846322	0.0939316
WBGene00018986	cdo-1	920.872	-0.800919	0.240654	-3.32809	0.00087444	0.0964781	Cysteine dioxygenase 1 [Source:UniProtKB/Swiss-Prot;Acc:Q20893]
WBGene00000617	col-40	798.708	5.15155	1.55032	3.32289	0.000890908	0.0977169	Cuticle collagen 40 [Source:UniProtKB/Swiss-Prot;Acc:P34804]
WBGene00004818	skr-12	553.424	0.864984	0.260652	3.31854	0.000904897	0.0981829	SKR-12; SKp1 Related (Ubiquitin ligase complex component); Skp1p homolog [Source:UniProtKB/TrEMBL;Acc:G5EGD5]
WBGene00004986	spp-1	3034.86	1.29936	0.391633	3.31779	0.000907317	0.0981829	SaPosin-like Protein family [Source:UniProtKB/TrEMBL;Acc:Q22291]
WBGene00044737	ttr-45	7824.36	0.910275	0.274454	3.31668	0.000910954	0.0981829	TransThyretin-Related family domain [Source:UniProtKB/TrEMBL;Acc:Q2EEM8]
WBGene00021005	ule-1	19507.9	1.28722	0.388424	3.31397	0.000919814	0.0985681	Uterine Lumin Expressed/locailized [Source:UniProtKB/TrEMBL;Acc:X5M5P2]
WBGene00219749	linc-30	20.4009	1.64968	0.498095	3.31197	0.000926398	0.0987064	NA
WBGene00007196	B0513.4	7147.11	1.10688	0.335317	3.30099	0.000963454	0.102071
WBGene00017485	F15E6.4	688.65	4.42623	1.34322	3.29525	0.000983334	0.103589
WBGene00010659	K08D8.5	1892.02	0.959582	0.291669	3.28997	0.00100197	0.104959
WBGene00006590	toc-1	2659.54	0.579188	0.176185	3.28739	0.00101122	0.105074	Similar to Transporter Of divalent Cations [Source:UniProtKB/TrEMBL;Acc:Q23281]
WBGene00018601	F48C1.9	303.642	1.90973	0.581081	3.28652	0.00101434	0.105074
WBGene00012213	W02D9.7	3268.34	1.22892	0.374292	3.28331	0.00102597	0.105692
WBGene00006049	ssp-32	5.93864	5.63472	1.71928	3.27737	0.00104778	0.106178	Sperm-specific class P protein 32 [Source:UniProtKB/Swiss-Prot;Acc:O45433]
WBGene00019121	npl-4.2	878.866	0.664148	0.202553	3.27889	0.00104216	0.106178	NPL (Yeast Nuclear Protein Localization) homolog [Source:UniProtKB/TrEMBL;Acc:Q95QZ9]
WBGene00022597	ZC395.5	814.845	2.2978	0.700733	3.27913	0.00104126	0.106178
WBGene00005180	srg-23	7.29551	2.31591	0.70776	3.27217	0.00106725	0.106989	Serpentine receptor class gamma [Source:UniProtKB/TrEMBL;Acc:Q9TYL6]
WBGene00009898	dod-23	4741.76	1.49144	0.455703	3.27283	0.00106475	0.106989	Downstream Of DAF-16 (Regulated by DAF-16) [Source:UniProtKB/TrEMBL;Acc:Q20615]
WBGene00007937	C34E11.4	98.1942	1.10391	0.337826	3.26768	0.00108432	0.108119
WBGene00000613	col-36	1110.49	5.46209	1.67621	3.2586	0.00111963	0.111046	Cuticle collagen 36 [Source:UniProtKB/Swiss-Prot;Acc:P34803]
WBGene00013079	ttr-26	2022.71	0.928094	0.285133	3.25496	0.00113409	0.111885	TransThyretin-Related family domain [Source:UniProtKB/TrEMBL;Acc:Q9XXR5]
WBGene00015322	C02B8.3	179.871	0.841468	0.258787	3.25159	0.00114761	0.112569
WBGene00015974	snrp-40.2	1521.21	0.881468	0.271325	3.24875	0.00115913	0.112569
WBGene00017481	F15B10.3	1308.79	1.08973	0.335426	3.2488	0.00115894	0.112569
WBGene00000716	col-143	14709.8	2.00026	0.616787	3.24303	0.00118266	0.11367	COLlagen [Source:UniProtKB/TrEMBL;Acc:O17038]
WBGene00019789	M116.2	315.041	1.41688	0.436868	3.24327	0.00118167	0.11367
WBGene00005002	spp-17	3995.61	1.97733	0.610005	3.2415	0.00118901	0.113693	SaPosin-like Protein family [Source:UniProtKB/TrEMBL;Acc:Q8WSN3]
WBGene00013778	clec-194	16.8502	-2.04571	0.632152	-3.2361	0.00121174	0.11525	C-type LECtin [Source:UniProtKB/TrEMBL;Acc:Q9U2W5]
WBGene00019134	F59H6.3	62.099	1.02922	0.318179	3.23471	0.00121765	0.11525
WBGene00001938	his-64	25.0857	2.09963	0.653221	3.21428	0.00130774	0.11782	Histone H4 [Source:UniProtKB/Swiss-Prot;Acc:P62784]
WBGene00001942	his-68	911.505	1.46468	0.454775	3.22066	0.00127895	0.11782	Histone H2A [Source:UniProtKB/Swiss-Prot;Acc:P09588]
WBGene00010440	ttr-51	15895.5	1.08087	0.335812	3.21868	0.00128781	0.11782	TransThyretin-Related family domain [Source:UniProtKB/TrEMBL;Acc:O62289]
WBGene00014053	ZK669.3	325.804	0.753305	0.234138	3.21735	0.00129381	0.11782	GILT-like protein ZK669.3 [Source:UniProtKB/Swiss-Prot;Acc:Q23570]
WBGene00015671	C10B5.3	733.743	0.676605	0.209729	3.2261	0.0012549	0.11782
WBGene00017756	F23F12.12	881.138	1.19071	0.369823	3.21969	0.00128331	0.11782
WBGene00018181	F38E1.9	2902.28	0.892264	0.276873	3.22264	0.00127014	0.11782	Mannose-P-dolichol utilization defect 1 protein homolog [Source:UniProtKB/Swiss-Prot;Acc:Q20157]
WBGene00021336	Y34F4.1	360.059	1.32521	0.411322	3.22183	0.00127373	0.11782
WBGene00044292	F56D6.8	397.733	4.09826	1.27504	3.21422	0.00130798	0.11782
WBGene00044554	F41E6.15	109.993	1.0118	0.314783	3.21427	0.00130778	0.11782
WBGene00001777	gst-29	206.982	1.1384	0.354341	3.21272	0.00131485	0.117869	Glutathione S-Transferase [Source:UniProtKB/TrEMBL;Acc:Q9NAB1]
WBGene00012231	W04A4.2	753.788	1.01989	0.317672	3.21052	0.00132496	0.118207
WBGene00004088	ppk-2	2209.87	0.657205	0.20524	3.20212	0.00136419	0.11831	PIP Kinase [Source:UniProtKB/TrEMBL;Acc:Q9BL73]
WBGene00013345	Y59A8B.8	678.975	-0.682272	0.212725	-3.2073	0.00133989	0.11831
WBGene00020193	T03F1.12	756.213	1.10336	0.34451	3.20269	0.00136151	0.11831
WBGene00022031	Y65B4A.8	1456.32	1.01721	0.317179	3.20706	0.001341	0.11831
WBGene00043982	B0403.6	158.752	0.906481	0.282788	3.20552	0.00134819	0.11831
WBGene00195025	F39E9.18	5.4286	2.94112	0.918021	3.20376	0.00135644	0.11831
WBGene00016637	C44B12.3	11.5846	1.92231	0.600649	3.20039	0.00137243	0.118473
WBGene00219876	F01G12.19	3.41529	-4.907	1.53496	-3.19683	0.00138945	0.11939	NA
WBGene00012294	nspa-8	17.7095	4.23661	1.32656	3.19368	0.00140473	0.12015	Nematode Specific Peptide family, group A [Source:UniProtKB/TrEMBL;Acc:Q23184]
WBGene00008113	C46C2.5	2076.21	1.21533	0.381746	3.18361	0.00145449	0.121266
WBGene00008169	C48B4.6	1436.82	0.933055	0.2928	3.18666	0.00143925	0.121266
WBGene00008295	nlp-39	1276.56	1.09883	0.344847	3.18643	0.00144039	0.121266	Neuropeptide-Like Protein [Source:UniProtKB/TrEMBL;Acc:O17707]
WBGene00010491	K02B7.3	1999.15	0.996115	0.312887	3.18363	0.00145443	0.121266
WBGene00013429	Y66D12A.3	65.8344	1.75745	0.552922	3.17848	0.0014805	0.121266
WBGene00013683	zoo-1	973.199	-0.628328	0.197334	-3.18409	0.0014521	0.121266	ZO-1 (Zonula Occludens tight junctional protein) Ortholog [Source:UniProtKB/TrEMBL;Acc:Q56VX4]
WBGene00013931	clec-97	344.464	1.25739	0.395075	3.18267	0.00145922	0.121266	C-type LECtin [Source:UniProtKB/TrEMBL;Acc:Q9XUI4]
WBGene00018448	F45D11.1	29.3506	-2.19599	0.69053	-3.18016	0.00147196	0.121266
WBGene00019241	H24K24.4	2663.18	0.797276	0.250872	3.17802	0.00148282	0.121266
WBGene00044690	M02B7.7	354.557	1.07063	0.336802	3.1788	0.00147887	0.121266
WBGene00013361	fars-2	2098.97	0.730032	0.22987	3.17585	0.00149398	0.121645	Mitochondrial phenylalanyl-tRNA synthetase; Phenylalanyl Amino-acyl tRNA Synthetase [Source:UniProtKB/TrEMBL;Acc:G5ECI8]
WBGene00003456	msp-63	18.9181	4.79488	1.51125	3.17278	0.00150985	0.122403	Major sperm protein 63 [Source:UniProtKB/Swiss-Prot;Acc:Q21244]
WBGene00021872	clec-85	11639.1	1.931	0.609218	3.16965	0.00152625	0.122882	C-type LECtin [Source:UniProtKB/TrEMBL;Acc:U4PAM5]
WBGene00023223	ZK1236.8	21.5326	-1.58265	0.499394	-3.16913	0.00152894	0.122882
WBGene00006040	ssp-11	14.6076	4.27416	1.35168	3.1621	0.00156634	0.124048	Sperm-specific class P protein 9/11 [Source:UniProtKB/Swiss-Prot;Acc:Q23058]
WBGene00009449	F35H8.4	30.3618	1.78025	0.562765	3.1634	0.00155935	0.124048
WBGene00016590	C42C1.12	365.265	-1.00833	0.318948	-3.16141	0.00157005	0.124048
WBGene00021079	W08A12.2	615.376	1.29939	0.410918	3.16217	0.00156599	0.124048
WBGene00022663	glrx-21	1237.57	1.15626	0.366262	3.15691	0.00159449	0.125446	GLutaRedoXin [Source:UniProtKB/TrEMBL;Acc:Q9N4P2]
WBGene00206415	F59H6.14	41.5163	1.06699	0.338323	3.15377	0.00161177	0.126273
WBGene00001772	gst-24	13855.1	1.11429	0.353582	3.15142	0.00162476	0.126459	Glutathione S-Transferase [Source:UniProtKB/TrEMBL;Acc:Q93694]
WBGene00004309	rap-3	119.906	-1.06439	0.337915	-3.14987	0.00163345	0.126459	RAP homolog (Vertebrate Rap GTPase family) [Source:UniProtKB/TrEMBL;Acc:O01312]
WBGene00022196	gpa-17	607.711	-0.888272	0.28202	-3.14968	0.00163449	0.126459	G Protein, Alpha subunit [Source:UniProtKB/TrEMBL;Acc:Q9N4F4]
WBGene00194793	W04G3.13	30.8146	1.57195	0.499425	3.14752	0.00164664	0.126873
WBGene00000535	cpi-1	14772.2	0.992765	0.316242	3.13926	0.00169375	0.128905	Cystatin [Source:UniProtKB/TrEMBL;Acc:G5EDZ9]
WBGene00004677		705.205	2.23015	0.710186	3.14024	0.0016881	0.128905
WBGene00012478	mxt-1	564.054	-0.72726	0.231577	-3.14047	0.00168679	0.128905	Eukaryotic translation initiation factor 4E-binding protein Mextli homolog [Source:UniProtKB/Swiss-Prot;Acc:Q9XW13]
WBGene00020286	T06A10.3	1920.67	0.986036	0.31435	3.13675	0.00170834	0.129486
WBGene00013704	Y106G6D.8	1025.11	0.84816	0.270639	3.13392	0.00172487	0.13021
WBGene00021626	rft-2	1492.94	0.860586	0.275124	3.128	0.00176003	0.131797	RiboFlavin Transporter; Riboflavin transporter [Source:UniProtKB/TrEMBL;Acc:Q95XZ2]
WBGene00220216	Y94H6A.15	24.7195	1.95646	0.625431	3.12817	0.00175898	0.131797
WBGene00002061	ife-3	12587.1	0.834963	0.267244	3.12435	0.00178197	0.132377	Eukaryotic translation initiation factor 4E-3 [Source:UniProtKB/Swiss-Prot;Acc:O61955]
WBGene00022491	Y119D3B.14	1586.66	0.971004	0.310777	3.12444	0.00178144	0.132377	Mitochondrial elongation factor G2 [Source:UniProtKB/TrEMBL;Acc:Q95Y73]
WBGene00004145	pqn-62	166.132	-0.889534	0.285108	-3.11999	0.00180859	0.133315	Prion-like-(Q/N-rich)-domain-bearing protein [Source:UniProtKB/TrEMBL;Acc:A0A0K3ATD0]
WBGene00008577	F08G2.5	7116.92	1.28469	0.411768	3.11994	0.00180889	0.133315
WBGene00002063	ife-5	576.686	0.963063	0.309324	3.11345	0.00184916	0.135214	Eukaryotic translation initiation factor 4E-5 [Source:UniProtKB/Swiss-Prot;Acc:P56570]
WBGene00013720	Y106G6H.8	1286.72	1.36006	0.436764	3.11395	0.00184603	0.135214
WBGene00044605	ttr-36	1562.55	0.880021	0.283068	3.10886	0.0018781	0.136793	TransThyretin-Related family domain [Source:UniProtKB/TrEMBL;Acc:Q45EK1]
WBGene00001934	his-60	289.517	1.40288	0.451625	3.1063	0.00189446	0.137448	Histone H4 [Source:UniProtKB/Swiss-Prot;Acc:P62784]
WBGene00000608	col-19	8437.63	1.98151	0.638949	3.1012	0.00192738	0.138757	Cuticle collagen 19 [Source:UniProtKB/Swiss-Prot;Acc:P18835]
WBGene00001915	his-41	2393.63	-0.546528	0.176187	-3.10198	0.00192234	0.138757	Probable histone H2B 3 [Source:UniProtKB/Swiss-Prot;Acc:Q27484]
WBGene00012588	lips-16	92.9283	1.26209	0.407714	3.09552	0.00196466	0.140407
WBGene00022562	ZC204.12	520.779	-0.933718	0.301645	-3.09542	0.00196537	0.140407
WBGene00001941	his-67	114.48	2.03889	0.65897	3.09406	0.00197437	0.140512	Histone H4 [Source:UniProtKB/Swiss-Prot;Acc:P62784]
WBGene00006826	unc-97	2355.73	-0.416064	0.134577	-3.09164	0.00199054	0.141124	LIM domain-containing protein unc-97 [Source:UniProtKB/Swiss-Prot;Acc:P50464]
WBGene00017484	F15E6.3	2592.51	2.84869	0.923189	3.08571	0.00203068	0.143424	RNA binding protein; RRM-type RNA binding protein [Source:UniProtKB/TrEMBL;Acc:G5ECT2]
WBGene00002982	lgg-3	1480.73	0.915975	0.296968	3.08443	0.00203945	0.1435	Ubiquitin-like protein ATG12 [Source:UniProtKB/TrEMBL;Acc:Q10931]
WBGene00000439	ceh-16	139.14	-0.917932	0.298496	-3.07519	0.00210366	0.146621	Homeobox protein engrailed-like ceh-16 [Source:UniProtKB/Swiss-Prot;Acc:P34326]
WBGene00008213	C49F8.1	136.157	-0.752662	0.244676	-3.07616	0.00209686	0.146621
WBGene00021123	W09G12.9	459.495	0.848343	0.275914	3.07467	0.00210739	0.146621
WBGene00012748	Y40H7A.11	41.3722	1.54897	0.504174	3.0723	0.00212415	0.147238
WBGene00000100	ajm-1	1931.7	-0.779024	0.253866	-3.06864	0.00215037	0.148503	Apical Junction Molecule [Source:UniProtKB/TrEMBL;Acc:A0A1C3NSM8]
WBGene00000693	col-119	33644.4	2.27077	0.740989	3.06451	0.00218024	0.148908	COLlagen [Source:UniProtKB/TrEMBL;Acc:Q18799]
WBGene00001617	glr-6	159.469	-0.793682	0.259138	-3.06278	0.00219294	0.148908	GLutamate Receptor family (AMPA) [Source:UniProtKB/TrEMBL;Acc:Q8MXV7]
WBGene00003435	msp-40	285.357	4.83778	1.57977	3.06234	0.00219617	0.148908	Major sperm protein 19/31/40/45/50/51/53/59/61/65/81/113/142 [Source:UniProtKB/Swiss-Prot;Acc:P53017]
WBGene00011181	R09H10.3	2513.72	1.80806	0.589962	3.06471	0.00217882	0.148908	Probable 5-hydroxyisourate hydrolase R09H10.3 [Source:UniProtKB/Swiss-Prot;Acc:Q21882]
WBGene00077764	F59C6.16	307.38	2.46556	0.80497	3.06292	0.0021919	0.148908
WBGene00007240	C01G10.15	58.8905	-1.91141	0.624505	-3.06068	0.00220839	0.149194
WBGene00019831	R02F2.1	20141.1	0.919004	0.300446	3.05879	0.0022223	0.149592
WBGene00007021	immp-1	740.232	1.6809	0.549732	3.05768	0.00223059	0.14961	Inner Mitochondrial Membrane Protease [Source:UniProtKB/TrEMBL;Acc:Q9XVD2]
WBGene00000690	col-116	80.1291	1.17951	0.386644	3.05064	0.00228358	0.152615	COLlagen [Source:UniProtKB/TrEMBL;Acc:O61525]
WBGene00000556	cnc-2	353.625	2.93345	0.962561	3.04755	0.00230715	0.153093	CaeNaCin (Caenorhabditis bacteriocin) [Source:UniProtKB/TrEMBL;Acc:O44611]
WBGene00018258	F41B4.2	482.525	0.993914	0.326105	3.04784	0.00230495	0.153093
WBGene00008040	ttr-5	1252.47	0.855587	0.28094	3.04544	0.00232337	0.153623	Transthyretin-like protein 5 [Source:UniProtKB/Swiss-Prot;Acc:Q03575]
WBGene00019744	M02H5.8	2852.82	2.62431	0.862125	3.044	0.00233455	0.153816
WBGene00000612	col-35	106.911	5.25736	1.72831	3.04192	0.00235078	0.15434	COLlagen [Source:UniProtKB/TrEMBL;Acc:Q93208]
WBGene00003465	msp-78	118.126	4.71666	1.55174	3.0396	0.00236895	0.154573	Major sperm protein 78 [Source:UniProtKB/Swiss-Prot;Acc:Q94053]
WBGene00022490	Y119D3B.13	2166.13	1.51637	0.498912	3.03935	0.0023709	0.154573
WBGene00002059	ife-1	13622.1	1.29265	0.425775	3.03598	0.00239756	0.154661	Eukaryotic translation initiation factor 4E-1 [Source:UniProtKB/Swiss-Prot;Acc:O45551]
WBGene00016638	perm-4	80784.7	1.1945	0.393246	3.03755	0.00238509	0.154661	PERMeable eggshell [Source:UniProtKB/TrEMBL;Acc:O44144]
WBGene00020088	R119.2	1467.85	1.10655	0.364598	3.03499	0.00240543	0.154661
WBGene00249815	F20D12.12	36.8526	-1.8251	0.601098	-3.03628	0.00239517	0.154661
WBGene00022029	Y65B4A.6	5030.33	1.18522	0.390685	3.03369	0.00241585	0.154797
WBGene00010541	ttr-1	370.729	0.778284	0.256823	3.03042	0.0024421	0.155943	Transthyretin-like protein 1 [Source:UniProtKB/Swiss-Prot;Acc:P34502]
WBGene00045414	T19H5.7	106.986	1.27788	0.421864	3.02913	0.00245258	0.156078
WBGene00010719	K09E4.1	102.862	2.22536	0.7367	3.02071	0.00252184	0.15994
WBGene00013221	Y54G11A.14	166.983	1.38922	0.460378	3.01757	0.00254814	0.16106
WBGene00007758	C27A7.8	362.087	1.41387	0.469401	3.01207	0.00259474	0.163451
WBGene00018280	F41C6.7	120.228	-0.865834	0.287718	-3.00932	0.00261833	0.163974
WBGene00018366	F42H10.2	978.573	0.82641	0.274641	3.00905	0.00262064	0.163974
WBGene00044242	C54C8.12	530.543	1.56702	0.521445	3.00515	0.00265454	0.16554
WBGene00013604	Y87G2A.18	801.459	0.97766	0.325918	2.99971	0.00270238	0.166299
WBGene00019550	K09C4.5	574.841	0.776249	0.258601	3.00172	0.00268459	0.166299
WBGene00019732	M02D8.6	225.532	1.68951	0.563127	3.00023	0.00269773	0.166299
WBGene00045245	ttr-34	969.682	1.05644	0.351894	3.00217	0.00268064	0.166299	TransThyretin-Related family domain [Source:UniProtKB/TrEMBL;Acc:A3FPK9]
WBGene00021758	Y50D7A.10	1023.67	1.20334	0.401479	2.99728	0.00272404	0.16708
WBGene00000675	col-101	13907.4	1.88652	0.629895	2.99498	0.00274467	0.167246	COLlagen [Source:UniProtKB/TrEMBL;Acc:U4PFF3]
WBGene00016097	C25E10.8	1016.73	0.586271	0.195747	2.99504	0.00274411	0.167246
WBGene00000628	col-51	186.881	4.51429	1.51235	2.98494	0.00283633	0.16818	COLlagen [Source:UniProtKB/TrEMBL;Acc:Q7Z152]
WBGene00003551	nas-33	28.49	-1.40943	0.47269	-2.98173	0.00286624	0.16818	Zinc metalloproteinase nas-33 [Source:UniProtKB/Swiss-Prot;Acc:P55114]
WBGene00004381	rnf-5	2658	0.667272	0.223519	2.98531	0.00283293	0.16818	RING finger protein 5 [Source:UniProtKB/Swiss-Prot;Acc:Q09463]
WBGene00009266	F30A10.9	1298.17	-0.78013	0.261714	-2.98085	0.00287447	0.16818
WBGene00011774	ttr-54	626.894	0.929045	0.311802	2.9796	0.00288629	0.16818	TransThyretin-Related family domain [Source:UniProtKB/TrEMBL;Acc:Q22499]
WBGene00012418	Y7A9C.1	92.3925	-1.09846	0.36792	-2.98559	0.00283033	0.16818
WBGene00013232	faah-4	3325.63	1.00878	0.338499	2.98015	0.00288104	0.16818	Fatty Acid Amide Hydrolase homolog [Source:UniProtKB/TrEMBL;Acc:Q9U217]
WBGene00013280	Y57A10C.1	158.468	1.10408	0.369116	2.99113	0.00277946	0.16818
WBGene00015739	ugt-7	162.666	-0.857996	0.287776	-2.98147	0.00286866	0.16818	UDP-GlucuronosylTransferase [Source:UniProtKB/TrEMBL;Acc:O16243]
WBGene00017785	F25E5.4	158.05	-1.09489	0.365942	-2.99197	0.00277185	0.16818
WBGene00018694	F52E1.5	87.1336	-1.07933	0.360947	-2.99027	0.00278733	0.16818
WBGene00021781	Y51H7C.3	1212.35	0.952523	0.319262	2.98352	0.00284955	0.16818
WBGene00045009	M117.8	4.84971	3.18298	1.0663	2.98509	0.00283498	0.16818
WBGene00194696	EEED8.18	18.3721	-1.64016	0.549533	-2.98465	0.00283905	0.16818
WBGene00000455	ceh-34	121.607	-0.863799	0.290001	-2.97861	0.00289562	0.168198	Homeobox protein ceh-34 [Source:UniProtKB/Swiss-Prot;Acc:Q94165]
WBGene00000597	col-8	6788.09	1.87107	0.629319	2.97317	0.00294743	0.168515	Cuticle collagen 8 [Source:UniProtKB/Swiss-Prot;Acc:P18833]
WBGene00000676	col-102	392.244	4.69878	1.58098	2.97207	0.00295802	0.168515	COLlagen [Source:UniProtKB/TrEMBL;Acc:Q9GZF7]
WBGene00013653	Y105C5B.14	53.4234	1.18869	0.399326	2.97674	0.00291333	0.168515
WBGene00016468	C36B7.5	57.1162	-1.18107	0.397034	-2.97474	0.00293234	0.168515
WBGene00016670	ilys-3	75.6994	1.64273	0.552989	2.97063	0.00297188	0.168515	Invertebrate-type lysozyme 3 [Source:UniProtKB/Swiss-Prot;Acc:O76357]
WBGene00018723	F53A3.7	389.002	1.53183	0.515636	2.97076	0.00297064	0.168515
WBGene00018756	F53C3.13	5711.84	0.791321	0.266106	2.9737	0.0029423	0.168515
WBGene00021351	eif-2alpha	10965.5	0.987708	0.332508	2.97048	0.00297337	0.168515	Eukaryotic Initiation Factor [Source:UniProtKB/TrEMBL;Acc:Q9BKU3]
WBGene00001841	hen-1	304.185	1.33797	0.454328	2.94495	0.00323007	0.174303	HEN-1; HEsitatioN behavior [Source:UniProtKB/TrEMBL;Acc:G5ECA8]
WBGene00007202	B0564.2	742.193	0.86466	0.293994	2.94108	0.0032707	0.174303
WBGene00007766	C27C7.1	3062.42	0.886645	0.301108	2.94461	0.00323361	0.174303
WBGene00007929	dmd-10	32.1392	-1.4371	0.486533	-2.95375	0.00313939	0.174303	DM (Doublesex/MAB-3) Domain family [Source:UniProtKB/TrEMBL;Acc:G5EEJ1]
WBGene00009215	thn-2	2458.62	2.09456	0.710362	2.94858	0.00319242	0.174303	THaumatiN family [Source:UniProtKB/TrEMBL;Acc:Q19876]
WBGene00011688	T10C6.6	4239.87	0.98405	0.333098	2.95423	0.00313445	0.174303
WBGene00015648	orai-1	1626.91	0.917652	0.311353	2.94731	0.00320556	0.174303	ORAI (Store-operated calcium channel) homolog [Source:UniProtKB/TrEMBL;Acc:B6VQ32]
WBGene00015722	C13A2.5	4.19383	-4.11402	1.39883	-2.94104	0.00327113	0.174303
WBGene00016023	prmt-6	446.329	1.32278	0.447853	2.95359	0.00314096	0.174303	PRotein arginine MethylTransferase [Source:UniProtKB/TrEMBL;Acc:O61833]
WBGene00016920	C54E4.5	703.303	0.963463	0.326533	2.95058	0.00317176	0.174303
WBGene00017258	F08F1.4	521.245	1.04941	0.356351	2.94489	0.00323066	0.174303
WBGene00017361	F10E9.12	607.394	0.921497	0.313152	2.94266	0.0032541	0.174303
WBGene00017512	nhr-179	63.2982	-0.979947	0.332811	-2.94446	0.0032352	0.174303	Nuclear Hormone Receptor family [Source:UniProtKB/TrEMBL;Acc:A0A0K3AXP8]
WBGene00020299	T07A9.12	242.047	0.763058	0.258041	2.95712	0.00310524	0.174303
WBGene00020647	pqbp-1.1	2363.92	0.840681	0.284505	2.95489	0.00312778	0.174303	PQBP1 (Polyglutamine tract-binding neurodegeneration protein) homolog [Source:UniProtKB/TrEMBL;Acc:O16786]
WBGene00020718	mrps-2	2171.34	0.676982	0.229357	2.95164	0.00316086	0.174303	Mitochondrial Ribosomal Protein, Small [Source:UniProtKB/TrEMBL;Acc:O17004]
WBGene00021721	Y49F6B.9	1341.19	1.03928	0.35338	2.94098	0.00327179	0.174303
WBGene00021933	Y55F3AR.2	1915.01	0.979614	0.331256	2.95727	0.00310377	0.174303
WBGene00021961	Y57E12B.1	8.73999	5.13236	1.74026	2.94919	0.00318606	0.174303
WBGene00044286	ugt-35	10.0562	1.73142	0.586843	2.9504	0.00317366	0.174303	UDP-GlucuronosylTransferase [Source:UniProtKB/TrEMBL;Acc:Q52GY8]
WBGene00185077	F58D2.4	45.1819	1.73808	0.589692	2.94743	0.00320424	0.174303
WBGene00012966	exos-1	2315.82	1.33218	0.45337	2.93839	0.00329923	0.175263	EXOSome (Multiexonuclease complex) component [Source:UniProtKB/TrEMBL;Acc:Q9XXD2]
WBGene00012806	Y43F4B.9	861.789	1.17653	0.400695	2.93623	0.00332227	0.175431
WBGene00013181	Y53H1B.2	2766.78	0.759375	0.258545	2.93712	0.0033128	0.175431
WBGene00044166	C54C6.7	196.863	1.17997	0.401971	2.93545	0.00333061	0.175431
WBGene00010422	H32K16.2	132.22	2.03586	0.693781	2.93444	0.00334146	0.175507
WBGene00003015	lin-29	188.661	-0.832751	0.284362	-2.92849	0.00340614	0.176081	Transcription factor [Source:UniProtKB/TrEMBL;Acc:G5EGB2]
WBGene00006993	zyg-8	2272.01	0.635283	0.216919	2.92867	0.00340413	0.176081	Serine/threonine-protein kinase zyg-8 [Source:UniProtKB/Swiss-Prot;Acc:Q95QC4]
WBGene00007419	C07E3.9	772.966	0.859318	0.293446	2.92837	0.00340746	0.176081	Phospholipase A(2) [Source:UniProtKB/TrEMBL;Acc:Q17790]
WBGene00012557	Y37D8A.19	30454.9	1.40366	0.479468	2.92753	0.0034167	0.176081
WBGene00021508	Y41D4A.6	1500.92	1.20372	0.410951	2.9291	0.00339946	0.176081	Glutamyl-tRNA(Gln) amidotransferase subunit A, mitochondrial [Source:UniProtKB/TrEMBL;Acc:U4PC78]
WBGene00044903	K03H1.13	621.35	0.788522	0.269362	2.92736	0.00341849	0.176081
WBGene00045268	ttr-42	1870.64	0.953109	0.325066	2.93205	0.00336734	0.176081	TransThyretin-Related family domain [Source:UniProtKB/TrEMBL;Acc:A2V8C3]
WBGene00003577	ndg-4	1364.38	0.892437	0.305554	2.92072	0.00349229	0.177693	Transmembrane protein NDG-4 [Source:UniProtKB/TrEMBL;Acc:G5EF61]
WBGene00004115	pqn-26	71.9457	-1.62151	0.554816	-2.92261	0.00347112	0.177693	Prion-like-(Q/N-rich)-domain-bearing protein [Source:UniProtKB/TrEMBL;Acc:O45322]
WBGene00012521	Y32B12B.1	30.3222	1.62697	0.556946	2.92124	0.00348644	0.177693
WBGene00015190	B0432.9	237.914	1.72304	0.590202	2.91941	0.00350698	0.177693
WBGene00016027	C23H5.8	8589.32	1.57585	0.539209	2.92252	0.00347215	0.177693
WBGene00021327	mrpl-38	2922.85	0.487731	0.167039	2.91986	0.00350184	0.177693	Mitochondrial Ribosomal Protein, Large [Source:UniProtKB/TrEMBL;Acc:Q9BL86]
WBGene00002234	kqt-2	393.383	-0.758998	0.260061	-2.91854	0.00351669	0.177703	Potassium channel, KvQLT family [Source:UniProtKB/TrEMBL;Acc:Q9GYM8]
WBGene00011529	T06D8.9	4646.57	1.09748	0.376497	2.91499	0.00355705	0.177717
WBGene00013689	bath-40	5942.26	0.801469	0.274868	2.91583	0.00354748	0.177717	BTB and MATH domain-containing protein 40 [Source:UniProtKB/Swiss-Prot;Acc:Q9NF14]
WBGene00013902	ZC455.1	136.67	-1.11679	0.383146	-2.91481	0.0035591	0.177717
WBGene00016341	mtq-2	723.438	1.43633	0.492852	2.91432	0.00356463	0.177717	MethylTransferase modifying glutamine (Q) [Source:UniProtKB/TrEMBL;Acc:O16582]
WBGene00044998	M199.9	190.107	3.71366	1.27352	2.91606	0.00354483	0.177717
WBGene00001399	fat-7	910.191	1.32523	0.455969	2.9064	0.00365609	0.178219	Delta(9)-fatty-acid desaturase fat-7 [Source:UniProtKB/Swiss-Prot;Acc:G5EGH6]
WBGene00006666	twk-11	48.075	-1.13118	0.389177	-2.90658	0.00365398	0.178219	TWiK family of potassium channels [Source:UniProtKB/TrEMBL;Acc:H2KZ66]
WBGene00007017	mdt-17	4183.02	0.96336	0.331339	2.90747	0.0036436	0.178219	Mediator of RNA polymerase II transcription subunit 17 [Source:UniProtKB/Swiss-Prot;Acc:Q9NAL4]
WBGene00009286	zipt-1	2837.42	0.809023	0.27824	2.90764	0.00364164	0.178219	Zrt (ZRT), Irt-(IRT-) like Protein Transporter [Source:UniProtKB/TrEMBL;Acc:O62192]
WBGene00012535	Y37A1A.2	289.914	0.724119	0.248985	2.90829	0.00363412	0.178219
WBGene00018710	F52G3.1	2430.59	-0.438962	0.151096	-2.90519	0.00367029	0.178219
WBGene00020986	W03D8.3	128.609	1.40803	0.483929	2.90958	0.00361915	0.178219
WBGene00021491	comt-4	463.724	1.76778	0.608344	2.90589	0.00366213	0.178219	Catechol-O-MethylTransferase family [Source:UniProtKB/TrEMBL;Acc:Q965W4]
WBGene00197517	R03G5.8	5.40504	-3.36538	1.15802	-2.90614	0.00365912	0.178219	NA
WBGene00219241	Y116A8A.150	4.11349	-4.1548	1.42786	-2.90981	0.00361645	0.178219
WBGene00000879	cyn-3	6687.32	1.61237	0.555167	2.90429	0.00368082	0.178266	Peptidyl-prolyl cis-trans isomerase 3 [Source:UniProtKB/Swiss-Prot;Acc:P52011]
WBGene00219571	linc-15	104.095	1.34388	0.463047	2.90225	0.00370494	0.17897
WBGene00044303	hst-3.2	102.679	-0.646132	0.222694	-2.90143	0.00371468	0.178977	Heparan SulphoTransferase [Source:UniProtKB/TrEMBL;Acc:Q4TTA0]
WBGene00020109	R151.6	2320.2	0.964441	0.332544	2.90019	0.00372936	0.179221	Derlin-2 [Source:UniProtKB/Swiss-Prot;Acc:Q21997]
WBGene00000013	abf-2	432.615	1.77695	0.614408	2.89213	0.00382639	0.180322	Antibacterial factor-related peptide 2 [Source:UniProtKB/Swiss-Prot;Acc:G5EC68]
WBGene00006589	tnt-4	1084.29	-1.43584	0.495936	-2.89522	0.00378896	0.180322	TropoNin T [Source:UniProtKB/TrEMBL;Acc:K8ERV5]
WBGene00009710	F44G3.10	418.989	3.52318	1.21827	2.89194	0.00382868	0.180322
WBGene00011446	T04F8.8	4162.25	0.995909	0.343992	2.89515	0.0037898	0.180322
WBGene00013385	Y62E10A.19	220.625	-1.15725	0.400173	-2.89186	0.00382965	0.180322
WBGene00015633	C09D4.2	1056.09	0.797057	0.275531	2.89281	0.00381815	0.180322
WBGene00020393	T10B5.7	1681.13	0.788625	0.272413	2.89496	0.00379201	0.180322
WBGene00235133	T26H5.14	132.633	1.01684	0.351371	2.89392	0.00380463	0.180322
WBGene00008170	C48B4.7	1828.58	0.879817	0.304667	2.8878	0.00387947	0.182208
WBGene00020735	T23F2.2	215.42	-1.088	0.376997	-2.88597	0.00390209	0.18281
WBGene00004030	pin-2	271.372	0.564765	0.196261	2.87763	0.00400675	0.184862	LIM domain-containing protein pin-2 [Source:UniProtKB/Swiss-Prot;Acc:Q19157]
WBGene00008897	F16H6.7	59.2953	-1.28101	0.444966	-2.87889	0.00399078	0.184862
WBGene00012781	nspd-7	244.548	2.69479	0.935728	2.87989	0.00397812	0.184862	Nematode Specific Peptide family, group D [Source:UniProtKB/TrEMBL;Acc:Q9XXF2]
WBGene00014150	ZK909.6	500.407	0.925061	0.321515	2.87719	0.00401229	0.184862	CES-2 region pioneer [Source:UniProtKB/TrEMBL;Acc:Q94127]
WBGene00021263	Y22D7AR.10	2985.16	2.20415	0.765319	2.88004	0.00397624	0.184862
WBGene00021732	Y49G5B.1	1904.86	0.904444	0.314375	2.87696	0.00401529	0.184862
WBGene00206420	T26G10.7	109.455	1.28414	0.44563	2.88164	0.00395615	0.184862
WBGene00000192	arl-8	5625.15	0.755762	0.262833	2.87545	0.00403451	0.185289	ARF-Like; Novel small G protein indispensable for equal chromosome segregation [Source:UniProtKB/TrEMBL;Acc:G5EDC6]
WBGene00013334	nlp-56	275.064	0.827656	0.288	2.87381	0.00405552	0.185341	Neuropeptide-Like Protein [Source:UniProtKB/TrEMBL;Acc:H2FLM4]
WBGene00016427	C34H4.5	486.722	0.806073	0.280475	2.87396	0.0040536	0.185341
WBGene00004814	skr-8	1427.81	1.0804	0.376413	2.87024	0.00410155	0.186987	SKR-8; SKp1 Related (Ubiquitin ligase complex component) [Source:UniProtKB/TrEMBL;Acc:G5ECY4]
WBGene00011941	T23B5.4	446.503	0.531532	0.185411	2.86678	0.00414668	0.188452
WBGene00014977	ZC15.4	13.4848	1.5795	0.551072	2.86623	0.00415392	0.188452
WBGene00000661	col-86	20.8326	1.66904	0.582968	2.86301	0.00419637	0.188558	COLlagen [Source:UniProtKB/TrEMBL;Acc:Q9XVY1]
WBGene00008171	C48B4.8	516.895	0.692971	0.241857	2.86521	0.00416738	0.188558
WBGene00010174	F56H9.2	5080.95	0.832212	0.290767	2.86212	0.00420812	0.188558
WBGene00010524	K03B8.6	296.61	-1.49482	0.522159	-2.86277	0.00419955	0.188558
WBGene00015683	C10G8.4	4756.07	1.37446	0.480336	2.86146	0.00421692	0.188558
WBGene00185048	urm-1	972.129	1.53253	0.53522	2.86337	0.00419159	0.188558	Ubiquitin-related modifier 1 homolog [Source:UniProtKB/Swiss-Prot;Acc:B3CKG1]
WBGene00000593	col-2	579.419	4.08577	1.42954	2.85809	0.00426195	0.189388	Cuticle collagen 2 [Source:UniProtKB/Swiss-Prot;Acc:P17656]
WBGene00001371	exl-1	1468.55	1.17691	0.411752	2.8583	0.00425915	0.189388	Chloride intracellular channel exl-1 [Source:UniProtKB/Swiss-Prot;Acc:O45405]
WBGene00021531	Y42G9A.1	191.096	-0.6659	0.233012	-2.8578	0.00426595	0.189388
WBGene00001336	qars-1	6544.97	0.471856	0.16542	2.85247	0.00433811	0.190648	Probable glutamine--tRNA ligase [Source:UniProtKB/Swiss-Prot;Acc:O62431]
WBGene00001393	fat-1	9329.72	0.810634	0.284238	2.85196	0.00434512	0.190648	Omega-3 fatty acid desaturase fat-1 [Source:UniProtKB/Swiss-Prot;Acc:Q9NEQ0]
WBGene00009484	F36G3.3	40.9881	1.02032	0.357763	2.85193	0.00434546	0.190648
WBGene00010364	H04D03.3	32.7354	1.15657	0.405145	2.8547	0.00430779	0.190648
WBGene00023428	K07C5.10	2.98654	-4.12543	1.44599	-2.853	0.00433082	0.190648
WBGene00010964	ctc-1	75100.6	1.10672	0.388255	2.85049	0.00436515	0.191062	Cytochrome c oxidase subunit 1 [Source:UniProtKB/Swiss-Prot;Acc:P24893]
WBGene00013647	Y105C5B.5	1070.45	1.88752	0.662812	2.84775	0.00440299	0.192267
WBGene00019630	emb-1	1027.79	1.15767	0.406677	2.84665	0.00441816	0.192479	Anaphase-promoting complex subunit emb-1 [Source:UniProtKB/Swiss-Prot;Acc:Q09410]
WBGene00017771	F25B4.8	743.063	1.51335	0.531886	2.84526	0.00443759	0.19273
WBGene00018742	F53B3.3	71.1989	-1.22636	0.431097	-2.84475	0.00444459	0.19273
WBGene00015099	ggtb-1	2125.48	0.649748	0.228546	2.84296	0.00446965	0.192919	Probable geranylgeranyl transferase type-2 subunit beta [Source:UniProtKB/Swiss-Prot;Acc:P41992]
WBGene00015560	C07A12.2	33.3127	-1.45649	0.512183	-2.84369	0.00445942	0.192919
WBGene00010036	cpar-1	1764.6	1.11372	0.391974	2.8413	0.00449301	0.19348	Histone H3-like centromeric protein cpar-1 [Source:UniProtKB/Swiss-Prot;Acc:P34440]
WBGene00017488	dct-7	77.0943	3.65324	1.28643	2.83982	0.00451394	0.193933	DAF-16/FOXO Controlled, germline Tumor affecting [Source:UniProtKB/TrEMBL;Acc:O44494]
WBGene00012713	bckd-1A	4395.45	0.771592	0.271884	2.83794	0.00454058	0.194629	2-oxoisovalerate dehydrogenase subunit alpha, mitochondrial [Source:UniProtKB/Swiss-Prot;Acc:O45924]
WBGene00010181	F57A8.6	10.689	-2.8046	0.989044	-2.83567	0.00457297	0.194675
WBGene00020036	R12E2.11	3281.97	0.537214	0.189439	2.83582	0.00457089	0.194675	Orotate phosphoribosyltransferase [Source:UniProtKB/Swiss-Prot;Acc:O61790]
WBGene00022447	hpo-20	232.497	1.0233	0.360784	2.83631	0.00456382	0.194675	Phosphatidylinositol-glycan biosynthesis class W protein [Source:UniProtKB/TrEMBL;Acc:D6RYD7]
WBGene00004490	rps-21	37247.9	1.67509	0.590923	2.8347	0.00458681	0.194819	40S ribosomal protein S21 [Source:UniProtKB/Swiss-Prot;Acc:P49197]
WBGene00004435	rpl-23	109370	1.59371	0.56282	2.83165	0.0046308	0.194921	60S ribosomal protein L23 [Source:UniProtKB/Swiss-Prot;Acc:P48158]
WBGene00012475	Y18D10A.2	12.4323	1.68346	0.594633	2.83109	0.004639	0.194921
WBGene00016634	C44B11.4	148.159	1.47266	0.520197	2.83096	0.00464091	0.194921
WBGene00018275	F41C3.11	191.855	-1.32347	0.467379	-2.83168	0.00463035	0.194921
WBGene00045400	C54D10.13	199.429	1.55084	0.547824	2.83092	0.00464147	0.194921
WBGene00018215	igcm-1	374.628	-0.826066	0.291885	-2.83011	0.00465326	0.194977	ImmunoGlobulin-like Cell adhesion Molecule family [Source:UniProtKB/TrEMBL;Acc:Q9TXI8]
WBGene00018760	irg-3	1496.49	1.26913	0.448596	2.8291	0.00466786	0.19515	Infection Response protein [Source:UniProtKB/TrEMBL;Acc:A0A0M7RF66]
WBGene00219617	linc-25	2.76054	-4.24591	1.50122	-2.8283	0.00467954	0.195201	NA
WBGene00000996	dif-1	5201.96	0.810249	0.286684	2.82628	0.00470922	0.195564
WBGene00017052	D2024.4	69.4579	-1.73159	0.612634	-2.82647	0.00470643	0.195564
WBGene00004908	snf-9	296.493	0.653637	0.231355	2.82526	0.00472421	0.19575	Transporter [Source:UniProtKB/TrEMBL;Acc:Q9XUG5]
WBGene00001729	grl-20	323.141	4.16211	1.47519	2.82141	0.00478128	0.196212	GRound-Like (Grd related) [Source:UniProtKB/TrEMBL;Acc:O61832]
WBGene00009816	F47B10.5	215.046	0.770889	0.273038	2.82338	0.00475207	0.196212
WBGene00015139	B0310.3	81.5294	-1.14039	0.404285	-2.82076	0.00479107	0.196212
WBGene00016144	mmab-1	1469.62	0.575198	0.203885	2.82119	0.00478457	0.196212	MethylMalonic Aciduria type B homolog [Source:UniProtKB/TrEMBL;Acc:Q18218]
WBGene00021401	prdx-6	2858.24	1.23176	0.436357	2.82282	0.00476038	0.196212	PeRoxireDoXin [Source:UniProtKB/TrEMBL;Acc:Q8MXT1]
WBGene00044249	F55B11.6	19.6958	1.24343	0.440891	2.82026	0.00479849	0.196212
WBGene00004086	pph-4.2	3384.62	1.11726	0.396704	2.81635	0.0048573	0.197888	Serine/threonine-protein phosphatase 4 catalytic subunit 2 [Source:UniProtKB/Swiss-Prot;Acc:Q9XTT8]
WBGene00009213	thn-1	253.359	1.44339	0.512674	2.81542	0.00487132	0.197888	THaumatiN family [Source:UniProtKB/TrEMBL;Acc:Q19874]
WBGene00020167	T02G5.11	40.6982	0.993774	0.352905	2.81598	0.00486285	0.197888
WBGene00003564	ncs-2	5461.04	-0.57162	0.203153	-2.81374	0.00489687	0.197978	Neuronal calcium sensor 2 [Source:UniProtKB/Swiss-Prot;Acc:P36609]
WBGene00012821	Y43F8B.11	208.803	0.995821	0.353984	2.81318	0.00490539	0.197978
WBGene00017153	E_BE45912.2	202.416	0.820783	0.291694	2.81385	0.00489516	0.197978
WBGene00000614	col-37	346.642	4.67566	1.67194	2.79655	0.00516512	0.201062	COLlagen [Source:UniProtKB/TrEMBL;Acc:G5ECU6]
WBGene00001885	his-11	3.25941	5.15846	1.84204	2.8004	0.00510396	0.201062	Histone H2B 1 [Source:UniProtKB/Swiss-Prot;Acc:P04255]
WBGene00003469	msp-142	210.109	4.61657	1.6464	2.80404	0.00504666	0.201062	Major sperm protein 19/31/40/45/50/51/53/59/61/65/81/113/142 [Source:UniProtKB/Swiss-Prot;Acc:P53017]
WBGene00004484	rps-15	75279.7	1.52244	0.543804	2.79961	0.00511649	0.201062	40S ribosomal protein S15 [Source:UniProtKB/Swiss-Prot;Acc:Q9XVP0]
WBGene00006374	syx-4	1668.51	1.0922	0.389636	2.80314	0.00506078	0.201062	Putative syntaxin-4 [Source:UniProtKB/Swiss-Prot;Acc:P91409]
WBGene00008681	scrm-4	520.678	0.748455	0.26681	2.8052	0.00502852	0.201062	Phospholipid scramblase [Source:UniProtKB/TrEMBL;Acc:O62149]
WBGene00008739	F13D12.3	1015	0.843117	0.301145	2.7997	0.00511495	0.201062
WBGene00011762	T13H10.2	44.617	-1.14099	0.407227	-2.80186	0.0050809	0.201062
WBGene00012460	dhps-1	1229.16	0.887529	0.317169	2.79828	0.00513752	0.201062	Deoxyhypusine synthase [Source:UniProtKB/Swiss-Prot;Acc:Q9XXJ0]
WBGene00013435	Y66D12A.9	5261.8	1.02942	0.368063	2.79686	0.00516017	0.201062
WBGene00016434	C35B1.4	1866.69	1.14791	0.410116	2.79898	0.00512641	0.201062
WBGene00017726	F22H10.2	345.222	1.97165	0.703804	2.80142	0.0050878	0.201062
WBGene00019535	tsen-34	440.804	1.27253	0.453629	2.80521	0.0050283	0.201062	Trna (tRNA) Splicing ENdonuclease subunit related [Source:UniProtKB/TrEMBL;Acc:U4PCA1]
WBGene00020783	blos-4	906.024	1.05668	0.377608	2.79836	0.00513624	0.201062	Biogenesis of lysosome-related organelles complex 1 subunit 4 [Source:UniProtKB/Swiss-Prot;Acc:Q22756]
WBGene00020886	ttr-6	4174.76	0.869158	0.310392	2.80019	0.0051072	0.201062	TransThyretin-Related family domain [Source:UniProtKB/TrEMBL;Acc:O17345]
WBGene00044897	M01D7.9	17.3938	2.10011	0.75091	2.79676	0.00516181	0.201062
WBGene00235297	F56D6.20	8.61157	4.35173	1.55265	2.80277	0.00506655	0.201062
WBGene00013001	Y48E1B.2	2411.72	0.942949	0.337304	2.79554	0.00518124	0.20127
WBGene00045208	F13E9.15	244.14	0.910316	0.325771	2.79435	0.00520049	0.201597
WBGene00007313	clec-147	244.719	1.21911	0.436688	2.79171	0.00524303	0.202825	C-type LECtin [Source:UniProtKB/TrEMBL;Acc:O62025]
WBGene00015247	B0545.4	88.3384	1.15906	0.41531	2.79084	0.0052571	0.202948
WBGene00000648	col-72	82.6082	4.00854	1.43819	2.78722	0.00531622	0.20418	COLlagen [Source:UniProtKB/TrEMBL;Acc:H2L0P1]
WBGene00013349	Y59A8B.12	1293.61	0.984217	0.353397	2.78502	0.00535246	0.20418
WBGene00013436	Y66D12A.10	2726.34	1.01646	0.364883	2.78572	0.00534092	0.20418
WBGene00015756	C14C6.2	2028	0.905465	0.325105	2.78515	0.0053503	0.20418
WBGene00017919	F29B9.1	1008.07	1.00582	0.360809	2.78768	0.00530876	0.20418	Protein-lysine N-methyltransferase CELE_F29B9.1 [Source:UniProtKB/TrEMBL;Acc:Q9GYH9]
WBGene00022642	lipl-5	17728.2	1.38073	0.495793	2.78488	0.00535472	0.20418	Lipase [Source:UniProtKB/TrEMBL;Acc:O61866]
WBGene00000670	col-95	13587	1.83002	0.657634	2.78273	0.00539041	0.204704	COLlagen [Source:UniProtKB/TrEMBL;Acc:Q86MP1]
WBGene00017272	F08F8.7	2156.95	0.6154	0.221098	2.78339	0.00537947	0.204704	Ribulose-phosphate 3-epimerase [Source:UniProtKB/TrEMBL;Acc:Q95ZW2]
WBGene00021114	W09C3.7	1035.19	0.937365	0.337041	2.78116	0.0054165	0.204743
WBGene00022822	ZK813.3	23619	1.05212	0.378428	2.78023	0.00543204	0.204743
WBGene00044988	W01A8.8	175.324	0.765726	0.275443	2.77998	0.0054363	0.204743
WBGene00045277	ZK742.6	45.5573	1.31689	0.473809	2.77938	0.00544635	0.204743
WBGene00045397	Y54G2A.52	539.653	1.68611	0.606208	2.7814	0.00541256	0.204743
WBGene00000660	col-85	362.588	3.35625	1.20855	2.77709	0.00548473	0.204874	COLlagen [Source:UniProtKB/TrEMBL;Acc:O18097]
WBGene00010966	nduo-3	2493.3	1.8923	0.68176	2.77562	0.00550971	0.204874	NADH-ubiquinone oxidoreductase chain 3 [Source:UniProtKB/Swiss-Prot;Acc:P24895]
WBGene00013393	Y62H9A.5	38197.6	1.02671	0.369572	2.7781	0.00546773	0.204874
WBGene00016342	C33C12.10	919.661	0.645435	0.232514	2.7759	0.00550486	0.204874
WBGene00021853	Y54F10AM.11	1000.58	1.04574	0.376456	2.77785	0.005472	0.204874
WBGene00044431	W03G9.8	1160.23	1.26656	0.456374	2.77526	0.00551576	0.204874
WBGene00004764	sel-7	79.985	-1.14895	0.414662	-2.77083	0.00559144	0.207272	SEL-7; Suppressor/Enhancer of Lin-12 [Source:UniProtKB/TrEMBL;Acc:G5EGS7]
WBGene00018045	F35D11.4	4319.2	1.40207	0.506141	2.77011	0.0056037	0.207302
WBGene00220049	R106.7	182.184	1.30954	0.472847	2.76949	0.00561448	0.207302	NA
WBGene00020604	T20B12.7	9079.38	0.971211	0.350816	2.76844	0.00563261	0.207561	Anamorsin homolog [Source:UniProtKB/Swiss-Prot;Acc:P41847]
WBGene00019409	K05F1.8	4.75804	4.55999	1.64809	2.76684	0.00566022	0.208167
WBGene00004118	pqn-29	46.4146	-1.33097	0.481167	-2.76612	0.00567274	0.208216	Prion-like-(Q/N-rich)-domain-bearing protein [Source:UniProtKB/TrEMBL;Acc:K8F812]
WBGene00014998	AH9.1	39.3116	0.95385	0.345042	2.76445	0.00570192	0.208876	Probable G-protein coupled receptor AH9.1 [Source:UniProtKB/Swiss-Prot;Acc:Q10904]
WBGene00013365	Y60A3A.19	2794.02	1.27668	0.462135	2.76256	0.00573492	0.209182
WBGene00016564	cmt-1	2442.54	0.808011	0.29245	2.76291	0.00572891	0.209182
WBGene00206459	Y80D4G.1	357.324	1.10097	0.398605	2.76205	0.00574392	0.209182
WBGene00010450	K01A11.2	1223.15	0.523745	0.189727	2.76052	0.00577099	0.20935
WBGene00021564	Y45G12B.3	1798.56	0.994965	0.360427	2.76052	0.00577099	0.20935	L-2-hydroxyglutarate dehydrogenase, mitochondrial [Source:UniProtKB/Swiss-Prot;Acc:Q9N4Z0]
WBGene00019208	lips-14	148.832	1.19345	0.43289	2.75693	0.00583461	0.211247
WBGene00003470	msp-152	102.52	4.94705	1.79595	2.75456	0.00587708	0.211329	Major sperm protein 152 [Source:UniProtKB/Swiss-Prot;Acc:Q23519]
WBGene00011591	T07F10.5	110.952	0.97	0.352201	2.75411	0.00588528	0.211329
WBGene00013535	gyg-3	58.8655	1.15564	0.419387	2.75554	0.0058595	0.211329
WBGene00016567	C41D11.9	852.071	0.714576	0.259502	2.75365	0.00589355	0.211329	TM2 domain-containing protein C41D11.9 [Source:UniProtKB/Swiss-Prot;Acc:Q95QZ5]
WBGene00021785	Y51H7C.7	1615.89	1.29951	0.471839	2.75415	0.00588453	0.211329
WBGene00019805	R01B10.3	534.719	1.23712	0.449486	2.7523	0.00591775	0.211335
WBGene00077757	E02H4.7	333.194	0.931797	0.338541	2.75239	0.00591611	0.211335
WBGene00077763	glb-34	23.3535	-1.24245	0.451513	-2.75175	0.0059277	0.211335	GLoBin related [Source:UniProtKB/TrEMBL;Acc:B3GWE1]
WBGene00004216	ptr-1	396.95	-1.00566	0.365663	-2.75023	0.00595533	0.211804	PaTched Related family [Source:UniProtKB/TrEMBL;Acc:Q18129]
WBGene00006567	tgt-2	2216.18	0.630767	0.229389	2.74977	0.00596364	0.211804	Queuine tRNA-ribosyltransferase accessory subunit 2 [Source:UniProtKB/Swiss-Prot;Acc:Q9NEU3]
WBGene00021350	Y37E3.8	98838.7	1.55656	0.566197	2.74915	0.00597494	0.211804
WBGene00001372	exo-3	3558.97	0.798596	0.291497	2.73964	0.00615064	0.212774	DNA-(apurinic or apyrimidinic site) lyase [Source:UniProtKB/TrEMBL;Acc:G5EBR7]
WBGene00004497	rps-28	23971.6	1.63311	0.596103	2.73964	0.00615066	0.212774	40S ribosomal protein S28 [Source:UniProtKB/Swiss-Prot;Acc:Q95Y04]
WBGene00008131	C47B2.2	2971.74	0.863125	0.314954	2.74048	0.006135	0.212774
WBGene00009455	phip-1	1184.82	0.902607	0.329058	2.743	0.00608799	0.212774	Protein HIstidine Phosphatase [Source:UniProtKB/TrEMBL;Acc:P90861]
WBGene00010685	aipl-1	7408.21	0.799831	0.29188	2.74027	0.00613881	0.212774	AIP1 (Actin Interacting Protein 1) Like [Source:UniProtKB/TrEMBL;Acc:O17939]
WBGene00010901	M28.10	6804.5	0.66529	0.242813	2.73993	0.00614519	0.212774
WBGene00010960	atp-6	25509	1.24231	0.453157	2.74145	0.00611679	0.212774	ATP synthase subunit a [Source:UniProtKB/Swiss-Prot;Acc:P24888]
WBGene00011809	T16G12.8	1060.73	0.789885	0.287791	2.74465	0.00605752	0.212774
WBGene00014203	ZK1058.3	385.925	0.738516	0.269245	2.74291	0.00608965	0.212774	Probable galactose-1-phosphate uridylyltransferase [Source:UniProtKB/Swiss-Prot;Acc:Q27536]
WBGene00016379	C33H5.13	460.625	1.69287	0.61679	2.74465	0.0060576	0.212774
WBGene00020924	W02B3.4	63.5789	1.04425	0.380928	2.74133	0.00611918	0.212774
WBGene00022380	Y94H6A.8	3771.03	1.3061	0.476285	2.74226	0.00610181	0.212774	Probable NADH dehydrogenase [ubiquinone] 1 alpha subcomplex subunit 12 [Source:UniProtKB/Swiss-Prot;Acc:Q9N2W7]
WBGene00044070	set-18	472.26	-0.979302	0.357266	-2.7411	0.00612339	0.212774	SET (Trithorax/polycomb) domain containing [Source:UniProtKB/TrEMBL;Acc:Q8I4F7]
WBGene00194771	F32F2.3	4.23641	-4.07012	1.48693	-2.73726	0.00619532	0.213922
WBGene00000646	H17B01.2	15.4806	-2.78611	1.01912	-2.73383	0.00626019	0.215035
WBGene00011054	arrd-13	1633.1	0.708571	0.259148	2.73423	0.00625256	0.215035	ARRestin Domain protein [Source:UniProtKB/TrEMBL;Acc:O17982]
WBGene00017091	ttr-40	134.413	0.950417	0.347723	2.73325	0.00627118	0.215035	TransThyretin-Related family domain [Source:UniProtKB/TrEMBL;Acc:Q65ZI5]
WBGene00018814	F54D11.4	1460.5	0.957825	0.350528	2.73252	0.00628522	0.215035
WBGene00021820	nipa-1	1738.9	0.70869	0.25932	2.73288	0.00627834	0.215035	NIPA1 (NonImprinted gene in Prader-Willi/Angelman syndrome region 1) homolog [Source:UniProtKB/TrEMBL;Acc:A3KFD2]
WBGene00007644	C17E4.4	282.488	0.841838	0.308765	2.72647	0.00640164	0.218617
WBGene00004431	rpl-19	97304.7	1.01002	0.370821	2.72375	0.00645459	0.219384	60S ribosomal protein L19 [Source:UniProtKB/Swiss-Prot;Acc:O02639]
WBGene00010660	K08D8.6	1846.21	0.556299	0.204304	2.7229	0.00647115	0.219384
WBGene00045251	F54F7.9	111.031	1.01408	0.372392	2.72314	0.00646653	0.219384
WBGene00194641	F47G3.4	371.416	0.562379	0.206489	2.72353	0.00645882	0.219384
WBGene00002090	ins-7	156.466	0.812272	0.298655	2.71976	0.00653288	0.220275	Probable insulin-like peptide beta-type 4 [Source:UniProtKB/Swiss-Prot;Acc:Q23430]
WBGene00015574	irg-1	540.968	-1.02115	0.375405	-2.72013	0.00652558	0.220275	Infection Response protein [Source:UniProtKB/TrEMBL;Acc:O16327]
WBGene00019914	clec-150	7193.83	1.87589	0.689586	2.72032	0.00652191	0.220275	C-type LECtin [Source:UniProtKB/TrEMBL;Acc:O44871]
WBGene00255426	C04G2.14	185.063	1.02916	0.378818	2.71676	0.00659247	0.221883
WBGene00001118	dyf-2	112.197	-0.781777	0.288394	-2.7108	0.00671219	0.221893	WD repeat-containing protein dyf-2 [Source:UniProtKB/Swiss-Prot;Acc:G5ECZ4]
WBGene00008139	C47D12.5	786.939	0.926268	0.341636	2.71127	0.00670259	0.221893
WBGene00008631	F10A3.1	249.122	1.86607	0.687709	2.71345	0.00665864	0.221893
WBGene00009191	F27D4.7	957.921	0.705228	0.259955	2.71289	0.00666998	0.221893	Vesicle transport protein [Source:UniProtKB/TrEMBL;Acc:Q7YTP0]
WBGene00009436	marb-1	1918.35	0.75529	0.278612	2.7109	0.00671004	0.221893	Mitochondrial Associated RiBonuclease homolog [Source:UniProtKB/TrEMBL;Acc:Q20062]
WBGene00010005	cnc-7	141.038	2.5155	0.926871	2.71397	0.00664827	0.221893	CaeNaCin (Caenorhabditis bacteriocin) [Source:UniProtKB/TrEMBL;Acc:Q9U3E5]
WBGene00010304	clpf-1	2698.04	0.728464	0.268783	2.71023	0.00672368	0.221893	CLeavage/Polyadenylation Factor Ia subunit [Source:UniProtKB/TrEMBL;Acc:Q2EEP3]
WBGene00011641	T09A5.15	671.213	1.57111	0.579171	2.7127	0.00667382	0.221893
WBGene00013550	Y75B8A.14	1989.15	0.565033	0.208046	2.71591	0.00660945	0.221893
WBGene00015134	B0304.2	1416.16	0.864058	0.318748	2.71079	0.00671235	0.221893
WBGene00016242	C30A5.10	15.2876	-1.35981	0.501659	-2.71063	0.00671556	0.221893
WBGene00010539	ttr-2	18327	0.687631	0.253774	2.70962	0.00673611	0.221911	Transthyretin-like protein 2 [Source:UniProtKB/Swiss-Prot;Acc:P34500]
WBGene00003119	mac-1	3501.32	1.02703	0.380037	2.70245	0.00688297	0.225291	Member of AAA family binding CED-4 [Source:UniProtKB/TrEMBL;Acc:Q9NAG4]
WBGene00015588	C08A9.8	21.941	-1.37945	0.510463	-2.70236	0.00688501	0.225291
WBGene00020189	tfbm-1	806.558	0.57353	0.212159	2.7033	0.00686539	0.225291	Dimethyladenosine transferase 1, mitochondrial [Source:UniProtKB/Swiss-Prot;Acc:P91424]
WBGene00235391	F38A5.22	185.839	1.32892	0.491781	2.70226	0.00688704	0.225291
WBGene00008281	C53D6.4	1111.84	0.484526	0.179717	2.69605	0.00701673	0.226356
WBGene00008740	F13D12.5	2164.82	0.797604	0.295614	2.69813	0.00697305	0.226356
WBGene00009783	rer-1	3636.41	0.53542	0.198504	2.69727	0.00699105	0.226356	Protein RER1 homolog [Source:UniProtKB/Swiss-Prot;Acc:P52879]
WBGene00013226	faah-5	31.4535	1.09989	0.407507	2.69907	0.00695345	0.226356	Fatty Acid Amide Hydrolase homolog [Source:UniProtKB/TrEMBL;Acc:Q9U243]
WBGene00013988	ZK512.10	19.2877	2.9259	1.08448	2.69797	0.00697637	0.226356
WBGene00014222	trpp-3	1775.14	0.944496	0.350316	2.69613	0.0070151	0.226356	Trafficking protein particle complex subunit 3 homolog [Source:UniProtKB/Swiss-Prot;Acc:P34605]
WBGene00017571	jmjd-3.1	784.075	-0.642995	0.238325	-2.69798	0.00697618	0.226356	Lysine-specific demethylase jmjd-3.1 [Source:UniProtKB/Swiss-Prot;Acc:Q95QK3]
WBGene00050914	T12B5.15	516.853	1.9068	0.707097	2.69666	0.00700397	0.226356
WBGene00006928	vit-4	20325.5	1.35082	0.501393	2.69413	0.00705728	0.227271	Vitellogenin-4 [Source:UniProtKB/Swiss-Prot;Acc:P18947]
WBGene00044776	T02B11.8	134.515	1.39497	0.518272	2.69158	0.00711143	0.22862
WBGene00001935	his-61	152.283	1.56365	0.58146	2.68918	0.00716272	0.229655	Histone H2A [Source:UniProtKB/Swiss-Prot;Acc:P09588]
WBGene00016621	arch-1	1131.59	1.13959	0.423808	2.68892	0.00716826	0.229655
WBGene00009373	F34D10.3	120.481	1.50645	0.560602	2.6872	0.00720539	0.229661
WBGene00011217	R10E11.5	78.4492	-1.03444	0.384788	-2.68833	0.00718107	0.229661
WBGene00016493	C37A2.7	50673.1	1.59454	0.593329	2.68745	0.00719995	0.229661	60S acidic ribosomal protein P2 [Source:UniProtKB/Swiss-Prot;Acc:O01504]
WBGene00003975	pen-2	1304.81	1.3135	0.489615	2.68273	0.00730242	0.229987	Gamma-secretase subunit pen-2 [Source:UniProtKB/Swiss-Prot;Acc:Q9U357]
WBGene00008730	F13B12.2	214.661	0.684706	0.255136	2.68369	0.00728139	0.229987
WBGene00012693	Y39B6A.34	1099.47	1.68941	0.629696	2.68289	0.0072989	0.229987	APOPT family protein Y39B6A.34, mitochondrial [Source:UniProtKB/Swiss-Prot;Acc:Q8MYM9]
WBGene00012695	Y39B6A.37	2358.1	0.751052	0.279901	2.68328	0.00729046	0.229987
WBGene00012712	ttm-1	1796.36	0.817301	0.304691	2.68239	0.00730974	0.229987	Toxin-regulated Targets of MAPK [Source:UniProtKB/TrEMBL;Acc:O45923]
WBGene00017390	F12A10.1	320.56	2.07816	0.774536	2.6831	0.00729429	0.229987
WBGene00020943	W02D7.8	24.2225	1.11216	0.414647	2.68219	0.00731428	0.229987
WBGene00022348	Y82E9BR.16	4166.23	0.929357	0.346051	2.6856	0.00723989	0.229987
WBGene00000751	col-178	5176.22	1.2373	0.461726	2.67974	0.00736793	0.230507	COLlagen [Source:UniProtKB/TrEMBL;Acc:O17641]
WBGene00008695	F11C3.1	34.0229	-1.09145	0.407289	-2.67979	0.00736684	0.230507	ATP-dependent DNA helicase [Source:UniProtKB/TrEMBL;Acc:O02243]
WBGene00017062	glrx-3	4616.17	0.628188	0.234348	2.68058	0.00734948	0.230507	GLutaRedoXin [Source:UniProtKB/TrEMBL;Acc:Q6EZG4]
WBGene00000640	col-64	14.7674	1.30691	0.488496	2.67538	0.00746447	0.231303	COLlagen [Source:UniProtKB/TrEMBL;Acc:O02271]
WBGene00000877	cyn-1	6755.07	1.48711	0.555902	2.67514	0.00746983	0.231303	Peptidyl-prolyl cis-trans isomerase 1 [Source:UniProtKB/Swiss-Prot;Acc:P52009]
WBGene00004361	rib-2	544.907	-0.846241	0.316367	-2.67487	0.00747579	0.231303	Exostosin-2 homolog [Source:UniProtKB/Swiss-Prot;Acc:O01705]
WBGene00009878	F49C12.9	3423.21	0.599567	0.223984	2.67682	0.00743239	0.231303
WBGene00011437	T04F3.2	100.795	-0.943973	0.35293	-2.67467	0.0074802	0.231303
WBGene00013960	cutl-8	203.882	-1.02983	0.384917	-2.67545	0.00746283	0.231303	CUTiclin-Like [Source:UniProtKB/TrEMBL;Acc:G5EDD6]
WBGene00185067	Y54G11A.17	1521.81	1.39631	0.521965	2.67511	0.0074704	0.231303
WBGene00000217	asp-4	26599.5	0.788668	0.295207	2.67158	0.00754958	0.233062	ASpartyl Protease [Source:UniProtKB/TrEMBL;Acc:Q21966]
WBGene00016755	C49A9.1	16.9396	-1.61672	0.605415	-2.67044	0.00757529	0.233084
WBGene00020446	T12B3.3	570.074	0.884526	0.331181	2.67082	0.0075666	0.233084
WBGene00000093	agt-1	1336.63	0.859235	0.323183	2.65867	0.00784507	0.233484	AlkylGuanine DNA alkylTransferase [Source:UniProtKB/TrEMBL;Acc:Q2HQK2]
WBGene00000526	clc-5	237.456	-0.774801	0.290595	-2.66625	0.00767019	0.233484	Clc-like protein 5 [Source:UniProtKB/Swiss-Prot;Acc:Q9NGJ7]
WBGene00001225	eif-3.B	12173.6	0.563942	0.211793	2.6627	0.00775156	0.233484	Eukaryotic translation initiation factor 3 subunit B [Source:UniProtKB/Swiss-Prot;Acc:Q9XWI6]
WBGene00001786	gst-38	757.603	1.96647	0.738847	2.66154	0.00777833	0.233484	Glutathione S-Transferase [Source:UniProtKB/TrEMBL;Acc:O45451]
WBGene00001890	his-16	2.71815	5.18951	1.95183	2.65878	0.00784231	0.233484	Histone H2A [Source:UniProtKB/Swiss-Prot;Acc:P09588]
WBGene00003129	map-1	3809.51	0.657942	0.247236	2.66119	0.00778642	0.233484	Methionine AminoPeptidase [Source:UniProtKB/TrEMBL;Acc:U4PBI7]
WBGene00003449	msp-56	38.9359	4.29571	1.61217	2.66455	0.00770909	0.233484	Major sperm protein 10/36/56/76 [Source:UniProtKB/Swiss-Prot;Acc:P05634]
WBGene00004097	pqm-96	3.50627	-3.77469	1.41967	-2.65886	0.00784065	0.233484	ParaQuat (Methylviologen) responsive [Source:UniProtKB/TrEMBL;Acc:Q95ZP9]
WBGene00007137	B0285.4	3620.16	0.564307	0.212084	2.66078	0.00779609	0.233484	Probable leucine carboxyl methyltransferase 1 [Source:UniProtKB/Swiss-Prot;Acc:P46554]
WBGene00008378	ule-3	38332.6	1.19202	0.448398	2.6584	0.00785125	0.233484	Uterine Lumin Expressed/locailized [Source:UniProtKB/TrEMBL;Acc:Q18947]
WBGene00010667	K08E4.3	816.858	0.72713	0.27273	2.66611	0.0076734	0.233484
WBGene00010670	K08E4.6	3149.65	0.684299	0.25677	2.66502	0.00769834	0.233484
WBGene00010768	K11D2.1	170.511	0.850303	0.319493	2.66142	0.00778129	0.233484
WBGene00012548	Y37D8A.6	755.525	0.718231	0.269556	2.66449	0.00771043	0.233484
WBGene00013008	clec-146	977.329	0.757157	0.284498	2.66138	0.0077822	0.233484	C-type LECtin [Source:UniProtKB/TrEMBL;Acc:B7WNB3]
WBGene00013358	abhd-3.1	1668.41	0.765305	0.287296	2.66383	0.00772577	0.233484	ABHydrolase Domain containing homolog [Source:UniProtKB/TrEMBL;Acc:Q9U1Z6]
WBGene00015868	C16H3.3	422.09	-0.687975	0.2582	-2.6645	0.0077103	0.233484
WBGene00020954	W02G9.4	1489.1	1.87085	0.701275	2.66778	0.00763533	0.233484
WBGene00189950	C39B5.14	36.1951	1.28698	0.483854	2.65985	0.00781766	0.233484
WBGene00195233	F31E9.11	70.7596	1.52599	0.572978	2.66327	0.00773857	0.233484
WBGene00255594	Y48G1BL.8	53.0823	1.339	0.503655	2.65857	0.00784723	0.233484
WBGene00202501	Y57E12B.10	10.0064	1.66752	0.627474	2.65751	0.00787208	0.233731
WBGene00005040	sra-14	112.717	0.988557	0.372255	2.65559	0.00791701	0.233739	Serpentine Receptor, class A (Alpha) [Source:UniProtKB/TrEMBL;Acc:Q9XVP3]
WBGene00008275	nstp-1	533.167	0.569072	0.21433	2.65512	0.00792809	0.233739	Nucleotide Sugar TransPorter family [Source:UniProtKB/TrEMBL;Acc:X5M5W6]
WBGene00021847	Y54F10AL.1	2456.82	0.607035	0.228606	2.65538	0.00792192	0.233739
WBGene00022721	ugtp-1	1198.2	0.516331	0.194488	2.65482	0.00793505	0.233739	UDP-galactose translocator 1 [Source:UniProtKB/Swiss-Prot;Acc:Q02334]
WBGene00219816	C14E2.12	57.2931	-1.57881	0.594553	-2.65546	0.00791995	0.233739	NA
WBGene00007730	C25G4.2	1657.67	1.15316	0.434588	2.65346	0.00796722	0.234317	Esterase C25G4.2 [Source:UniProtKB/Swiss-Prot;Acc:Q18169]
WBGene00021757	taco-1	1447.84	0.449999	0.169871	2.64907	0.00807143	0.237008	Translational Activator of Cytochrome c Oxidase [Source:UniProtKB/TrEMBL;Acc:Q965T4]
WBGene00000490	che-11	19.9911	-1.13452	0.428392	-2.64833	0.00808895	0.237149
WBGene00006050	ssq-1	524.503	3.45396	1.3058	2.64509	0.0081668	0.237472	Sperm-Specific family, class Q [Source:UniProtKB/TrEMBL;Acc:Q21294]
WBGene00007724	C25F9.4	89.76	-1.17863	0.445891	-2.64331	0.0082099	0.237472
WBGene00008765	ttx-7	3759.67	0.586592	0.221976	2.64259	0.00822734	0.237472	Inositol monophosphatase ttx-7 [Source:UniProtKB/Swiss-Prot;Acc:Q19420]
WBGene00009021	F21D9.8	5.54292	2.98678	1.12878	2.64603	0.00814418	0.237472
WBGene00010183	fipr-13	86.9512	1.4309	0.541209	2.64389	0.00819582	0.237472	FIP (Fungus-Induced Protein) Related [Source:UniProtKB/TrEMBL;Acc:Q7YX01]
WBGene00017070	praf-3	4353.18	0.632088	0.238836	2.64654	0.00813203	0.237472	PRA1 family protein [Source:UniProtKB/TrEMBL;Acc:H2KZJ7]
WBGene00021190	Y14H12A.1	446.99	1.49578	0.565931	2.64304	0.00821643	0.237472
WBGene00044457	C18H7.11	541.874	0.940518	0.355879	2.6428	0.00822239	0.237472
WBGene00044466	Y48A5A.3	596.444	1.46165	0.55277	2.64422	0.00818789	0.237472
WBGene00255600	F54H5.14	93.7848	-1.0908	0.412382	-2.64512	0.00816629	0.237472
WBGene00003107	mab-10	156.606	-0.68354	0.258742	-2.64179	0.00824701	0.237672
WBGene00020120	R160.3	221.979	0.810703	0.307016	2.64059	0.00827623	0.238146
WBGene00002269	lec-6	29296.5	1.92529	0.729277	2.64	0.00829069	0.238195	Galectin [Source:UniProtKB/TrEMBL;Acc:Q9N384]
WBGene00009092	tomm-20	4784.63	1.13095	0.428626	2.63854	0.00832635	0.238484	Mitochondrial import receptor subunit TOM20 homolog [Source:UniProtKB/Swiss-Prot;Acc:Q19766]
WBGene00022650	ZK84.2	97.7008	2.11839	0.802708	2.63905	0.00831388	0.238484
WBGene00000453	ceh-32	533.14	-0.751669	0.285037	-2.63709	0.00836205	0.238717	Homeobox protein ceh-32 [Source:UniProtKB/Swiss-Prot;Acc:Q23175]
WBGene00009443	F35G12.7	443.722	0.495334	0.187865	2.63665	0.00837288	0.238717
WBGene00017374	ttr-41	5765.54	1.1066	0.419674	2.63682	0.0083688	0.238717	TransThyretin-Related family domain [Source:UniProtKB/TrEMBL;Acc:Q86NH9]
WBGene00020151	T01G6.1	6.65959	-2.12268	0.806022	-2.63352	0.00845049	0.240195
WBGene00044374	C17F4.12	18.4163	3.0072	1.14181	2.63372	0.00844545	0.240195
WBGene00012777	lact-8	185.454	-1.21977	0.463362	-2.63243	0.00847768	0.240235	Beta-LACTamase domain containing [Source:UniProtKB/TrEMBL;Acc:F3Y5Q9]
WBGene00017780	F25E2.2	1931.42	0.720224	0.273553	2.63285	0.00846724	0.240235
WBGene00021485	Y40A1A.3	32.7148	-0.969932	0.36855	-2.63175	0.0084946	0.24035
WBGene00002079	xpo-2	9810.65	0.831556	0.316187	2.62995	0.00853974	0.240532	EXPOrtin (Nuclear export receptor) [Source:UniProtKB/TrEMBL;Acc:Q965V4]
WBGene00004037	plc-2	665.155	-0.699878	0.266113	-2.63	0.00853838	0.240532	Phosphoinositide phospholipase C [Source:UniProtKB/TrEMBL;Acc:Q9XWB7]
WBGene00007357	C06A12.3	384.453	0.65355	0.248499	2.62999	0.0085387	0.240532
WBGene00016058	nspd-3	126.366	4.2714	1.62485	2.62879	0.0085688	0.240986	Nematode Specific Peptide family, group D [Source:UniProtKB/TrEMBL;Acc:G5EG23]
WBGene00004771	sem-2	772.111	-0.654468	0.249011	-2.62827	0.00858205	0.240995	Transcription factor sem-2 [Source:UniProtKB/Swiss-Prot;Acc:Q8T3B9]
WBGene00000088	aex-5	434.084	-0.671902	0.256141	-2.62317	0.00871152	0.241822	Endoprotease aex-5 [Source:UniProtKB/Swiss-Prot;Acc:P91863]
WBGene00002254	lbp-2	14295.6	0.677903	0.258182	2.62567	0.00864776	0.241822	Fatty acid-binding protein homolog 2 [Source:UniProtKB/Swiss-Prot;Acc:Q20224]
WBGene00003457	msp-64	320.195	4.60365	1.75481	2.62345	0.00870443	0.241822	Major sperm protein 19/31/40/45/50/51/53/59/61/65/81/113/142 [Source:UniProtKB/Swiss-Prot;Acc:P53017]
WBGene00007616	rpoa-12	1258.77	1.03928	0.396022	2.6243	0.00868282	0.241822	DNA-directed RNA polymerase subunit [Source:UniProtKB/TrEMBL;Acc:O17587]
WBGene00011828	nepr-1	2503.11	0.923922	0.352235	2.62303	0.00871525	0.241822	Nuclear envelope phosphatase-regulatory subunit 1 homolog [Source:UniProtKB/Swiss-Prot;Acc:Q9XXN3]
WBGene00018463	F45E1.2	8.47907	-2.41068	0.918532	-2.62449	0.00867783	0.241822
WBGene00020896	T28D9.4	1639.88	0.679482	0.25895	2.62399	0.00869072	0.241822
WBGene00021602	clec-205	182.111	0.754055	0.287224	2.62532	0.00865676	0.241822	C-type LECtin [Source:UniProtKB/TrEMBL;Acc:Q9N4W4]
WBGene00000287	cal-3	88.9239	-0.959008	0.367908	-2.60665	0.00914333	0.242698	CALmodulin related genes [Source:UniProtKB/TrEMBL;Acc:U4PQW9]
WBGene00000893	cyn-17	176.558	-1.63909	0.625345	-2.6211	0.00876457	0.242698	CYclophyliN [Source:UniProtKB/TrEMBL;Acc:A9D417]
WBGene00001167	eef-2	134996	0.501013	0.19211	2.60795	0.0091087	0.242698	Elongation factor 2 [Source:UniProtKB/Swiss-Prot;Acc:P29691]
WBGene00002033	htp-2	2235.23	0.709635	0.271258	2.61609	0.00889442	0.242698	Him-Three Paralog [Source:UniProtKB/TrEMBL;Acc:Q95XC8]
WBGene00003804	npp-18	4728.96	0.6586	0.252925	2.60394	0.00921595	0.242698	Nucleoporin SEH1 [Source:UniProtKB/Swiss-Prot;Acc:O45933]
WBGene00004164	pqn-83	5036.89	0.750129	0.287946	2.6051	0.00918468	0.242698	Prion-like-(Q/N-rich)-domain-bearing protein [Source:UniProtKB/TrEMBL;Acc:Q9U2K1]
WBGene00004410	rla-2	37190.4	1.55644	0.597469	2.60505	0.00918607	0.242698	Ribosomal protein, Large subunit, Acidic (P1) [Source:UniProtKB/TrEMBL;Acc:Q9U1X9]
WBGene00006044	ssp-16	162.111	3.81287	1.46138	2.60909	0.00907823	0.242698	Sperm-specific class P protein 16 [Source:UniProtKB/Swiss-Prot;Acc:P91499]
WBGene00006574	tin-13	3400.38	1.42941	0.548293	2.60702	0.00913345	0.242698	Mitochondrial import inner membrane translocase subunit tim-13 [Source:UniProtKB/Swiss-Prot;Acc:O45319]
WBGene00006668	twk-13	145.161	-0.620242	0.237889	-2.60727	0.00912666	0.242698	TWiK family of potassium channels [Source:UniProtKB/TrEMBL;Acc:Q21729]
WBGene00006814	unc-82	624.967	-0.72144	0.276476	-2.60941	0.00906976	0.242698
WBGene00008101	C44H9.6	121.695	-0.759342	0.290687	-2.61224	0.00899522	0.242698
WBGene00008856	F15D3.6	2059.03	0.571909	0.218611	2.61611	0.00889388	0.242698
WBGene00010068	F54F7.8	17.5925	-1.29975	0.497071	-2.61482	0.00892752	0.242698
WBGene00010466	K01D12.7	11.3379	3.20844	1.22892	2.61078	0.00903358	0.242698
WBGene00011033	R05D11.5	1744.81	0.3803	0.146099	2.60303	0.00924049	0.242698
WBGene00011590	bus-19	390.251	-1.26853	0.485714	-2.61168	0.00900977	0.242698
WBGene00012631	Y38H6C.19	131.476	1.16952	0.449249	2.60328	0.00923354	0.242698
WBGene00012700	Y39B6A.42	2136.82	1.05151	0.404037	2.60251	0.00925445	0.242698
WBGene00012917	Y46G5A.29	174.372	-1.08438	0.415563	-2.60943	0.00906926	0.242698
WBGene00013599	eipr-1	980.675	0.565893	0.217029	2.60746	0.00912178	0.242698	EARP-interacting protein 1 [Source:UniProtKB/Swiss-Prot;Acc:Q9U1Q0]
WBGene00015111	B0281.4	19.7026	1.36295	0.52028	2.61965	0.00880199	0.242698
WBGene00015610	C08F1.6	1315.74	0.879121	0.33737	2.60581	0.00916572	0.242698
WBGene00018169	nspb-2	12.7294	3.90013	1.49579	2.60741	0.00912303	0.242698	Nematode Specific Peptide family, group B [Source:UniProtKB/TrEMBL;Acc:Q94214]
WBGene00018390	F43E2.1	730.788	0.363208	0.139514	2.60338	0.00923106	0.242698
WBGene00019156	H04M03.12	76.4462	-0.716622	0.27415	-2.61398	0.00894941	0.242698
WBGene00019648	K11D12.8	53.7823	1.08437	0.414999	2.61295	0.00897655	0.242698
WBGene00019710	M01E11.1	1432.77	0.752467	0.287203	2.61998	0.00879347	0.242698	Protein-S-isoprenylcysteine O-methyltransferase [Source:UniProtKB/TrEMBL;Acc:P91402]
WBGene00021795	Y52E8A.2	980.974	1.02911	0.393413	2.61586	0.0089004	0.242698
WBGene00021818	Y53G8B.2	689.255	0.914129	0.350472	2.60828	0.00909982	0.242698
WBGene00022035	Y65B4BL.3	728.794	0.839861	0.322692	2.60267	0.00925015	0.242698
WBGene00044233	Y56A3A.36	523.233	0.833864	0.320077	2.6052	0.00918208	0.242698
WBGene00044611	T27A3.8	15.7285	2.17	0.831356	2.61019	0.00904913	0.242698
WBGene00044757	Y55F3BR.11	265.037	1.4712	0.56238	2.61602	0.00889612	0.242698
WBGene00045067	F07C6.6	32.3243	2.0342	0.776634	2.61925	0.00881238	0.242698
WBGene00185005	T03F6.10	39.7196	1.47828	0.567986	2.60266	0.00925032	0.242698
WBGene00194689	Y38H6C.24	17.3271	2.20072	0.845503	2.60285	0.00924524	0.242698
WBGene00194747	H05C05.4	130.636	0.945014	0.361496	2.61418	0.00894425	0.242698
WBGene00195143	C16D2.2	35.87	1.80115	0.691856	2.60336	0.00923156	0.242698
WBGene00000445	ceh-22	39.6862	-1.37785	0.530136	-2.59905	0.00934817	0.242766	Homeobox protein ceh-22 [Source:UniProtKB/Swiss-Prot;Acc:P41936]
WBGene00001103	dsl-1	233.245	1.08649	0.417823	2.60037	0.0093124	0.242766	Delta-like protein [Source:UniProtKB/TrEMBL;Acc:O45201]
WBGene00008449	E01G6.1	187.515	-1.56517	0.601715	-2.60118	0.00929036	0.242766
WBGene00009466	F36D1.7	227.861	1.13003	0.434574	2.60031	0.00931388	0.242766
WBGene00010578	K04H8.3	24.52	1.4622	0.562131	2.60117	0.00929061	0.242766
WBGene00044666	F33G12.7	789.838	1.43512	0.552161	2.59909	0.00934709	0.242766
WBGene00050917	Y53G8AL.4	27.0739	1.74913	0.672743	2.6	0.00932251	0.242766
WBGene00004485	rps-16	81366.1	1.42848	0.550156	2.59649	0.00941811	0.242937	40S ribosomal protein S16 [Source:UniProtKB/Swiss-Prot;Acc:Q22054]
WBGene00016930	madf-6	1036.22	0.651683	0.25091	2.59728	0.00939656	0.242937	MADF domain transcription factor [Source:UniProtKB/TrEMBL;Acc:H2KZF9]
WBGene00019683	K12H6.2	392.961	0.8773	0.337687	2.59797	0.00937764	0.242937
WBGene00020413	T10E9.3	87.2872	-1.4489	0.558037	-2.59643	0.00941988	0.242937
WBGene00045356	T03E6.9	12.4571	1.54967	0.596535	2.59778	0.0093828	0.242937
WBGene00004456	rpl-43	50112.5	1.53747	0.592311	2.59572	0.00943934	0.242966	60S ribosomal protein L37a [Source:UniProtKB/Swiss-Prot;Acc:Q9U2A8]
WBGene00020096	R144.6	1324.82	0.808702	0.311586	2.59544	0.00944709	0.242966	Transmembrane protein 144 homolog [Source:UniProtKB/Swiss-Prot;Acc:Q10000]
WBGene00003424	msp-3	110.596	4.32004	1.66535	2.59408	0.00948449	0.243173	Major sperm protein 3 [Source:UniProtKB/Swiss-Prot;Acc:Q19832]
WBGene00004992	spp-7	33.5281	-1.92816	0.743254	-2.59422	0.00948058	0.243173	SaPosin-like Protein family [Source:UniProtKB/TrEMBL;Acc:V6CM12]
WBGene00013855	ZC116.3	80.1839	-0.931875	0.359346	-2.59325	0.0095073	0.243173	Probable cubilin [Source:UniProtKB/Swiss-Prot;Acc:Q20911]
WBGene00044344	mrpl-39	2046.03	1.01394	0.390931	2.59365	0.00949622	0.243173	Mitochondrial Ribosomal Protein, Large [Source:UniProtKB/TrEMBL;Acc:Q4W5T0]
WBGene00017344	F10E7.2	744.879	0.680719	0.262605	2.59218	0.00953695	0.243597
WBGene00001778	gst-30	174.176	0.947613	0.365652	2.59157	0.00955387	0.243695	Glutathione S-Transferase [Source:UniProtKB/TrEMBL;Acc:Q23520]
WBGene00009222	fbxa-95	539.753	0.902437	0.348543	2.58917	0.00962066	0.245064	F-box A protein [Source:UniProtKB/TrEMBL;Acc:O17849]
WBGene00001936	his-62	125.406	1.2114	0.468048	2.58819	0.00964819	0.245096	Probable histone H2B 4 [Source:UniProtKB/Swiss-Prot;Acc:Q27876]
WBGene00003766	nlp-28	491.242	2.47506	0.956243	2.58832	0.00964455	0.245096	Neuropeptide-like protein 28 QWGYGGY-amide GYGGYGGY-amide GMYGGY-amide GMYGGW-amide [Source:UniProtKB/Swiss-Prot;Acc:O44665]
WBGene00004952	spd-1	5097.19	0.864871	0.334636	2.58452	0.00975155	0.247048	SPD-1 [Source:UniProtKB/TrEMBL;Acc:G5ED58]
WBGene00016442	C35D10.5	1219.52	0.498786	0.19299	2.58452	0.00975155	0.247048
WBGene00019622	K10C2.7	26.8596	1.52669	0.591051	2.58301	0.00979421	0.247121
WBGene00021830	Y54E10A.10	4417.39	0.56825	0.219971	2.58329	0.0097862	0.247121	Ribosome production factor 2 homolog [Source:UniProtKB/Swiss-Prot;Acc:Q9N3F0]
WBGene00022379	Y94H6A.7	329.124	1.20707	0.467146	2.58392	0.00976838	0.247121
WBGene00014253	ZK1320.3	10777.9	0.667972	0.258706	2.58198	0.00982363	0.247529
WBGene00044489	pudl-1	58.2664	1.62371	0.629302	2.58018	0.00987486	0.248484	PUD-Like protein [Source:UniProtKB/TrEMBL;Acc:Q4R163]
WBGene00007252	mlt-2	136.016	-0.709779	0.275202	-2.57912	0.00990533	0.248484
WBGene00008220	C50B6.7	386.704	1.87181	0.725738	2.57918	0.0099036	0.248484	Alpha-amylase [Source:UniProtKB/TrEMBL;Acc:P91982]
WBGene00010429	H38K22.4	3.05226	-4.32973	1.67934	-2.57823	0.00993065	0.248484
WBGene00011430	T04C12.8	338.902	1.30446	0.506025	2.57786	0.00994151	0.248484
WBGene00023451	mlc-7	884.646	0.862153	0.334341	2.57866	0.00991836	0.248484	Myosin Light Chain [Source:UniProtKB/TrEMBL;Acc:Q69Z12]
WBGene00018056	F35F10.6	72.0313	-0.9523	0.369506	-2.57722	0.00995974	0.248607
WBGene00017127	E04F6.8	4655.64	0.960367	0.372743	2.57649	0.00998098	0.248804
WBGene00006832	unc-105	158.59	-0.959524	0.372596	-2.57524	0.0100172	0.249269	Degenerin-like protein unc-105 [Source:UniProtKB/Swiss-Prot;Acc:Q09274]
WBGene00011175	R09E10.5	45.7909	-1.07808	0.41876	-2.57446	0.0100398	0.249269
WBGene00019094	F59A7.7	21.2947	1.57727	0.612624	2.57462	0.0100351	0.249269
WBGene00004422	rpl-11.1	60754.8	0.954738	0.371259	2.57162	0.0101223	0.250452	60S ribosomal protein L11-1 [Source:UniProtKB/Swiss-Prot;Acc:Q94300]
WBGene00021739	Y50D4A.5	284.317	1.12496	0.437592	2.5708	0.0101464	0.250452
WBGene00044178	C30G7.4	218.532	0.940111	0.3657	2.57071	0.0101489	0.250452
WBGene00044894	Y71F9AR.4	763.491	1.32074	0.513801	2.57052	0.0101546	0.250452
WBGene00194849	K09A9.8	55.8099	1.37861	0.536017	2.57195	0.0101128	0.250452
WBGene00004478	rps-9	95997.1	1.68748	0.65677	2.56936	0.0101888	0.250811	40S ribosomal protein S9 [Source:UniProtKB/Swiss-Prot;Acc:Q20228]
WBGene00015193	clec-117	35.6571	3.25099	1.26548	2.56897	0.0102002	0.250811	C-type LECtin [Source:UniProtKB/TrEMBL;Acc:P90996]
WBGene00017277	F09C12.2	5.42761	-2.60262	1.01323	-2.56865	0.0102095	0.250811	Mitogen-activated protein kinase [Source:UniProtKB/TrEMBL;Acc:Q19243]
WBGene00010962	ctc-3	32905.6	1.00868	0.392995	2.56663	0.0102691	0.251613	Cytochrome c oxidase subunit 3 [Source:UniProtKB/Swiss-Prot;Acc:P24891]
WBGene00019945	R08C7.1	36.765	1.39859	0.544856	2.56689	0.0102614	0.251613
WBGene00255596	Y37B11A.8	263.551	0.9671	0.376908	2.56588	0.0102915	0.25183
WBGene00004442	rpl-28	45078.7	1.33202	0.519783	2.56265	0.0103877	0.252091	60S ribosomal protein L28 [Source:UniProtKB/Swiss-Prot;Acc:Q21930]
WBGene00004469	rps-0	111975	1.1236	0.438194	2.56416	0.0103425	0.252091	40S ribosomal protein SA [Source:UniProtKB/Swiss-Prot;Acc:P46769]
WBGene00004472	rps-3	104180	1.13977	0.444888	2.56192	0.0104096	0.252091	40S ribosomal protein S3 [Source:UniProtKB/Swiss-Prot;Acc:P48152]
WBGene00004496	rps-27	38153.3	1.27108	0.496081	2.56224	0.0103999	0.252091	40S ribosomal protein S27 [Source:UniProtKB/Swiss-Prot;Acc:Q9TXP0]
WBGene00006721	ubh-1	938.995	0.923409	0.360205	2.56357	0.0103602	0.252091	Ubiquitin carboxyl-terminal hydrolase [Source:UniProtKB/TrEMBL;Acc:Q9UAV3]
WBGene00017199	clec-45	336.744	3.15542	1.23167	2.5619	0.0104103	0.252091	C-type LECtin [Source:UniProtKB/TrEMBL;Acc:P91214]
WBGene00020756	T24A6.20	762.999	0.779603	0.304207	2.56273	0.0103851	0.252091
WBGene00020957	W02H5.2	2629.85	1.07129	0.417759	2.56436	0.0103365	0.252091
WBGene00008899	F16H6.9	15.6739	1.66869	0.651759	2.56029	0.0104586	0.252399
WBGene00009969	F53B7.7	13.6405	-1.55764	0.608424	-2.56012	0.0104636	0.252399
WBGene00021881	Y54G2A.16	86.3626	1.02134	0.398846	2.56073	0.0104451	0.252399
WBGene00005848	srw-101	3.52865	3.09472	1.20929	2.55911	0.0104939	0.252803	Serpentine Receptor, class W [Source:UniProtKB/TrEMBL;Acc:Q7Z2B1]
WBGene00018422	F44E2.9	952.103	1.42541	0.557307	2.55767	0.0105376	0.253447
WBGene00021321	Y34B4A.5	774.703	1.1549	0.451603	2.55733	0.0105478	0.253447
WBGene00044792	F59C6.14	459.762	1.19062	0.466043	2.55473	0.0106269	0.255018
WBGene00011731	acbp-5	1820.52	0.652466	0.255463	2.55406	0.0106476	0.255186	Acyl-Coenzyme A Binding Protein [Source:UniProtKB/TrEMBL;Acc:Q9XVJ0]
WBGene00012796	Y43F4A.1	330.231	-0.8448	0.330861	-2.55334	0.0106696	0.255386	Leishmanolysin-like peptidase [Source:UniProtKB/Swiss-Prot;Acc:O62446]
WBGene00003783	nos-1	1244.83	0.754031	0.295597	2.55087	0.0107453	0.255451	NanOS related [Source:UniProtKB/TrEMBL;Acc:Q09597]
WBGene00007334	C05C10.7	421.237	0.748857	0.293798	2.54888	0.0108068	0.255451
WBGene00008038	C40H1.2	32.1785	1.1468	0.449722	2.55003	0.0107714	0.255451
WBGene00008287	C54C6.5	38.8967	1.40653	0.551537	2.55021	0.0107658	0.255451
WBGene00011444	T04F8.6	508.161	-0.651694	0.255477	-2.55089	0.010745	0.255451
WBGene00011510	pdha-1	7769.86	0.530874	0.208227	2.5495	0.0107878	0.255451	Probable pyruvate dehydrogenase E1 component subunit alpha, mitochondrial [Source:UniProtKB/Swiss-Prot;Acc:P52899]
WBGene00012908	Y46G5A.18	2175.02	1.026	0.402302	2.55032	0.0107625	0.255451
WBGene00018332	F42A9.3	22.8509	3.29178	1.29024	2.5513	0.0107323	0.255451
WBGene00020703	T22F7.4	469.629	-0.840729	0.32991	-2.54836	0.010823	0.255451
WBGene00022363	Y92H12BL.1	2143.32	0.906591	0.3557	2.54875	0.010811	0.255451	Threonylcarbamoyladenosine tRNA methylthiotransferase [Source:UniProtKB/Swiss-Prot;Acc:Q8MXQ7]
WBGene00194717	ZC239.22	147.89	1.10623	0.433562	2.5515	0.0107261	0.255451
WBGene00000851	cut-1	282.334	3.50727	1.38031	2.54093	0.0110558	0.258977	Cuticlin-1 [Source:UniProtKB/Swiss-Prot;Acc:Q03755]
WBGene00007220	C01B9.1	53.7729	-1.09975	0.432798	-2.54102	0.011053	0.258977
WBGene00011247	mrpl-49	1587.14	1.14112	0.448959	2.54171	0.0110311	0.258977	Probable 39S ribosomal protein L49, mitochondrial [Source:UniProtKB/Swiss-Prot;Acc:Q21939]
WBGene00020416	T10E9.6	13.0309	2.85176	1.12199	2.54169	0.0110319	0.258977
WBGene00021253	Y22D7AL.15	1581.95	1.51463	0.595823	2.54207	0.0110198	0.258977
WBGene00044547	C13A2.12	136.079	3.99777	1.57302	2.54145	0.0110393	0.258977
WBGene00015913	C17F4.7	92943.4	1.27609	0.502418	2.53989	0.0110887	0.259097
WBGene00045275	F18E3.12	183.805	0.890818	0.350673	2.54031	0.0110755	0.259097
WBGene00021074	W07E6.2	3582.29	0.450798	0.177599	2.53829	0.0111396	0.259636
WBGene00044680	F30A10.13	381.886	1.0106	0.398122	2.53843	0.0111351	0.259636
WBGene00001500	ftn-1	1560.9	1.33747	0.52726	2.53665	0.011192	0.260117	Ferritin [Source:UniProtKB/TrEMBL;Acc:O16453]
WBGene00009050	F22D6.2	17040.9	0.59027	0.232766	2.5359	0.011216	0.260117
WBGene00013002	Y48E1B.3	1771.07	0.550551	0.217001	2.53708	0.011178	0.260117
WBGene00015355	C02F12.5	2142.16	0.869549	0.342861	2.53616	0.0112076	0.260117	BPTI/Kunitz inhibitor domain-containing protein C02F12.5 [Source:UniProtKB/Swiss-Prot;Acc:Q11101]
WBGene00010608	K07A1.1	1808.3	0.705555	0.27842	2.53414	0.0112725	0.260777
WBGene00015218	B0507.1	150.599	-0.778967	0.307365	-2.53434	0.0112659	0.260777
WBGene00002039	hum-6	487.755	-0.889982	0.351582	-2.53136	0.011362	0.261228	Unconventional myosin heavy chain 6 [Source:UniProtKB/Swiss-Prot;Acc:P91443]
WBGene00002105	ins-22	49.5491	0.813876	0.321361	2.53259	0.0113222	0.261228	Probable insulin-like peptide alpha-type 2 [Source:UniProtKB/Swiss-Prot;Acc:Q21508]
WBGene00015582	C07H6.9	78.7619	1.16769	0.461177	2.53198	0.0113421	0.261228
WBGene00020130	igcm-2	71.8194	-0.85707	0.33841	-2.53264	0.0113208	0.261228	ImmunoGlobulin-like Cell adhesion Molecule family [Source:UniProtKB/TrEMBL;Acc:Q22040]
WBGene00044341	ave-1	732.615	1.19412	0.471681	2.53163	0.0113533	0.261228	AVEugle (Drosophila eye differentiation) homolog [Source:UniProtKB/TrEMBL;Acc:Q4W4Y7]
WBGene00003699	nhr-109	195.196	-0.55606	0.219731	-2.53064	0.0113856	0.261449	Nuclear Hormone Receptor family [Source:UniProtKB/TrEMBL;Acc:H2L0L6]
WBGene00021543	Y43B11AR.1	1240.48	0.527207	0.208407	2.5297	0.0114159	0.261822
WBGene00002064	iff-1	31259.9	1.07587	0.425479	2.52862	0.0114512	0.262034	Eukaryotic translation initiation factor 5A-1 [Source:UniProtKB/Swiss-Prot;Acc:P34563]
WBGene00012996	pinn-4	2108.46	0.724434	0.28655	2.52813	0.0114673	0.262034	Peptidyl-prolyl cis-trans isomerase [Source:UniProtKB/TrEMBL;Acc:Q9NAF9]
WBGene00021506	Y41D4A.4	5608.76	0.593941	0.234904	2.52844	0.011457	0.262034	Transmembrane 9 superfamily member [Source:UniProtKB/TrEMBL;Acc:Q95Y24]
WBGene00017474	F14H12.7	52.1565	1.43729	0.568641	2.52759	0.0114849	0.262114
WBGene00001058	dpf-5	6195.7	0.585448	0.232061	2.52281	0.011642	0.2625	Dipeptidyl Peptidase Four (IV) family [Source:UniProtKB/TrEMBL;Acc:Q9TYX1]
WBGene00003467	msp-81	178.8	4.60928	1.82537	2.52511	0.0115661	0.2625	Major sperm protein 19/31/40/45/50/51/53/59/61/65/81/113/142 [Source:UniProtKB/Swiss-Prot;Acc:P53017]
WBGene00010597	K06A4.7	7717.38	1.43136	0.567094	2.52403	0.011602	0.2625
WBGene00010965	ctc-2	25948	1.39001	0.550709	2.52404	0.0116014	0.2625	Cytochrome c oxidase subunit 2 [Source:UniProtKB/Swiss-Prot;Acc:P24894]
WBGene00015404	nstp-4	2882.97	0.609751	0.241556	2.52427	0.0115939	0.2625	Nucleotide Sugar TransPorter family [Source:UniProtKB/TrEMBL;Acc:O16658]
WBGene00016998	D1005.4	107.537	1.24816	0.494754	2.5228	0.0116426	0.2625
WBGene00017461	bath-28	779.062	0.711465	0.281946	2.5234	0.0116225	0.2625	BTB and MATH domain containing [Source:UniProtKB/TrEMBL;Acc:H2KZR8]
WBGene00018731	F53A9.8	2935.97	1.94415	0.770356	2.5237	0.0116126	0.2625
WBGene00045406	D1086.19	27.6785	1.26517	0.500905	2.52577	0.0115444	0.2625
WBGene00235258	T05C7.5	6.12192	2.90354	1.14918	2.52663	0.0115162	0.2625
WBGene00020490	tmc-1	224.7	-0.788373	0.312564	-2.52227	0.0116599	0.262574	Transmembrane channel-like protein 1 [Source:UniProtKB/Swiss-Prot;Acc:D3KZG3]
WBGene00013015	Y48E1C.2	1227.02	0.630441	0.249998	2.52179	0.011676	0.262619
WBGene00000698	col-124	5402.25	1.74502	0.692812	2.51875	0.0117773	0.26426	COLlagen [Source:UniProtKB/TrEMBL;Acc:Q9NAR3]
WBGene00018102	math-28	24.8957	-1.01032	0.401064	-2.51911	0.0117653	0.26426	MATH (Meprin-associated Traf homology) domain containing [Source:UniProtKB/TrEMBL;Acc:Q2L6V3]
WBGene00011404	T03F7.7	325.967	-0.728601	0.289328	-2.51825	0.0117938	0.264311
WBGene00007686	tomm-40	6779.8	0.554181	0.220212	2.51658	0.0118499	0.264933	Mitochondrial import receptor subunit TOM40 homolog [Source:UniProtKB/Swiss-Prot;Acc:Q18090]
WBGene00009509	F37D6.3	31.2286	1.63434	0.649367	2.51682	0.0118419	0.264933
WBGene00021848	nhr-239	10.2407	1.41347	0.561766	2.51611	0.0118658	0.26497	Nuclear Hormone Receptor family [Source:UniProtKB/TrEMBL;Acc:Q9BKZ8]
WBGene00008027	scl-5	375.049	1.13831	0.453139	2.51205	0.0120033	0.26731	SCP-Like extracellular protein [Source:UniProtKB/TrEMBL;Acc:Q18543]
WBGene00009624	cnc-8	1263.08	1.71482	0.682836	2.51132	0.0120279	0.26731	CaeNaCin (Caenorhabditis bacteriocin) [Source:UniProtKB/TrEMBL;Acc:Q9XVW3]
WBGene00011155	R09B3.2	13681.4	1.33518	0.531567	2.51178	0.0120125	0.26731
WBGene00044696	F52E1.14	11789.8	0.556179	0.221445	2.51159	0.0120188	0.26731
WBGene00004157	pqn-75	540.978	1.31682	0.525275	2.50692	0.0121788	0.268277	Prion-like-(Q/N-rich)-domain-bearing protein [Source:UniProtKB/TrEMBL;Acc:Q8MQG9]
WBGene00004479	rps-10	65078.3	1.11454	0.444656	2.50653	0.0121923	0.268277	Ribosomal Protein, Small subunit [Source:UniProtKB/TrEMBL;Acc:O01869]
WBGene00011075	R07A4.4	30.4871	-1.22684	0.489367	-2.50699	0.0121763	0.268277
WBGene00011571	ttr-46	7289.43	0.73832	0.294239	2.50925	0.0120988	0.268277	Transthyretin-like protein 46 [Source:UniProtKB/Swiss-Prot;Acc:Q22285]
WBGene00012830	mrps-28	1839.01	1.40185	0.558843	2.50849	0.0121247	0.268277	Mitochondrial Ribosomal Protein, Small [Source:UniProtKB/TrEMBL;Acc:Q9XWP0]
WBGene00016386	tag-272	21.6018	-1.61317	0.64365	-2.50628	0.012201	0.268277
WBGene00018298	nlp-50	303.196	1.56601	0.62426	2.50859	0.0121215	0.268277	Neuropeptide-Like Protein [Source:UniProtKB/TrEMBL;Acc:Q20295]
WBGene00021338	Y34F4.3	25.0743	1.15275	0.459905	2.50649	0.0121936	0.268277
WBGene00021554	Y45G5AL.1	3454.55	0.690207	0.27523	2.50774	0.0121505	0.268277
WBGene00008857	timm-23	6401.13	1.33886	0.534359	2.50553	0.0122267	0.268527	Translocase, Inner Mitochondrial Membrane [Source:UniProtKB/TrEMBL;Acc:Q9XVQ2]
WBGene00006825	unc-96	641.907	-0.585514	0.233813	-2.50419	0.0122731	0.268912
WBGene00011607	T08D2.2	60.388	1.12054	0.447418	2.50446	0.0122639	0.268912
WBGene00004433	rpl-21	68434.2	1.00715	0.402433	2.50265	0.0123266	0.269446	60S ribosomal protein L21 [Source:UniProtKB/Swiss-Prot;Acc:P34334]
WBGene00004779	ser-4	220.284	0.859673	0.343561	2.50225	0.0123408	0.269446	SERotonin/octopamine receptor family; Serotonin receptor [Source:UniProtKB/TrEMBL;Acc:G5EGH0]
WBGene00044069	hat-1	6753.75	0.71316	0.284972	2.50256	0.0123299	0.269446	Histone AcetylTransferase [Source:UniProtKB/TrEMBL;Acc:Q21484]
WBGene00017779	gtr-1	45.0084	0.997937	0.398947	2.50143	0.0123693	0.269752	GPCR Thermal Receptor [Source:UniProtKB/TrEMBL;Acc:Q19779]
WBGene00016636	perm-2	49841.4	0.943789	0.377431	2.50056	0.0123997	0.270098	PERMeable eggshell [Source:UniProtKB/TrEMBL;Acc:O44145]
WBGene00194695	B0462.5	196.455	0.621008	0.248412	2.49991	0.0124225	0.27028
WBGene00011859	T20D3.6	1722.53	1.27193	0.509104	2.49837	0.0124766	0.271141
WBGene00018682	aagr-4	1027.06	-0.942704	0.377396	-2.49792	0.0124924	0.271169	Acid Alpha Glucosidase Relate [Source:UniProtKB/TrEMBL;Acc:O17352]
WBGene00010248	F58D5.9	125.498	0.76744	0.307444	2.4962	0.0125533	0.271383
WBGene00016038	cst-2	11.3268	-1.3438	0.538135	-2.49714	0.0125198	0.271383	Caenorhabditis STE20-like kinase [Source:UniProtKB/TrEMBL;Acc:Q304D8]
WBGene00044505	D2024.10	4.67754	1.89858	0.760592	2.49619	0.0125536	0.271383
WBGene00044607	K02A11.4	352.323	1.44192	0.577693	2.49599	0.0125605	0.271383
WBGene00013077	ttr-24	3535.64	0.726778	0.291435	2.49379	0.0126387	0.272038	TransThyretin-Related family domain [Source:UniProtKB/TrEMBL;Acc:H2KMI9]
WBGene00018783	cbs-2	120.041	1.77794	0.712858	2.49409	0.0126279	0.272038	Cystathionine Beta-Synthase [Source:UniProtKB/TrEMBL;Acc:Q9N4K2]
WBGene00020690	T22E5.1	46.2578	1.34237	0.538348	2.4935	0.0126492	0.272038
WBGene00206528	Y53H1A.7	3.22642	-3.3859	1.3573	-2.49459	0.0126103	0.272038
WBGene00003952	pbs-6	8006.46	0.804209	0.322877	2.49076	0.0127471	0.273513	Proteasome subunit beta type-1 [Source:UniProtKB/Swiss-Prot;Acc:P34286]
WBGene00013375	srsx-25	31.3535	0.946744	0.380093	2.49082	0.0127449	0.273513	Serpentine Receptor, class SX [Source:UniProtKB/TrEMBL;Acc:Q9U1X1]
WBGene00012324	rhy-1	589.832	-0.669507	0.269259	-2.48648	0.0129015	0.276507	Regulator of hypoxia-inducible factor 1 [Source:UniProtKB/Swiss-Prot;Acc:Q9XVW1]
WBGene00015940	zipt-3	1736.11	0.534484	0.215014	2.48582	0.0129255	0.276703	Zrt (ZRT), Irt-(IRT-) like Protein Transporter [Source:UniProtKB/TrEMBL;Acc:Q09957]
WBGene00009662	F43G6.10	533.269	0.925484	0.372443	2.4849	0.0129587	0.276778
WBGene00219694	linc-36	6.97882	3.26542	1.31392	2.48525	0.0129462	0.276778	NA
WBGene00004474	rps-5	115596	1.17901	0.474795	2.48321	0.0130205	0.277161	40S ribosomal protein S5 [Source:UniProtKB/Swiss-Prot;Acc:P49041]
WBGene00010256	hrg-3	123.621	2.35188	0.94743	2.48238	0.0130509	0.277161	Heme Responsive protein [Source:UniProtKB/TrEMBL;Acc:Q20983]
WBGene00013708	Y106G6E.4	547.892	0.510795	0.205739	2.48274	0.0130378	0.277161	Probable 5-formyltetrahydrofolate cyclo-ligase [Source:UniProtKB/Swiss-Prot;Acc:Q9XWE6]
WBGene00018779	F53H8.3	591.36	0.921847	0.371267	2.48297	0.0130291	0.277161
WBGene00044310	H20J04.9	487.509	0.530074	0.21347	2.48314	0.0130231	0.277161
WBGene00043053	F47H4.12	22.1818	-1.43381	0.577748	-2.48171	0.0130752	0.27736
WBGene00001838	hda-10	1886.97	0.775773	0.312714	2.48077	0.0131099	0.277748	Histone deacetylase [Source:UniProtKB/TrEMBL;Acc:Q9U266]
WBGene00016336	C33C12.4	96.2387	1.37339	0.553694	2.48041	0.0131232	0.277748
WBGene00003953	pbs-7	10965.3	0.877139	0.353738	2.47962	0.0131521	0.278043	Proteasome subunit beta [Source:UniProtKB/TrEMBL;Acc:P90868]
WBGene00020350	T08B2.12	12.0251	3.78708	1.5278	2.47878	0.0131833	0.278194
WBGene00235351	C32B5.18	35.6619	2.11616	0.853766	2.47862	0.0131891	0.278194
WBGene00000442	ceh-19	24.1785	-0.990415	0.399677	-2.47804	0.0132107	0.278335	Homeobox protein ceh-19 [Source:UniProtKB/Swiss-Prot;Acc:P26797]
WBGene00012142	T28H10.1	192.592	0.536932	0.216749	2.47721	0.0132415	0.278669
WBGene00000762	coq-2	1052.7	0.433013	0.175138	2.47241	0.0134205	0.27904	4-hydroxybenzoate polyprenyltransferase, mitochondrial [Source:UniProtKB/Swiss-Prot;Acc:Q8I7J4]
WBGene00001693	grd-4	63.2654	2.18098	0.881466	2.47426	0.0133512	0.27904	GRounDhog (Hedgehog-like family) [Source:UniProtKB/TrEMBL;Acc:O02154]
WBGene00002180	jtr-1	1530.57	0.981153	0.396891	2.4721	0.0134323	0.27904	JTB gene Related [Source:UniProtKB/TrEMBL;Acc:Q9N4B5]
WBGene00004274	rab-11.1	18878.5	0.526567	0.212682	2.47585	0.013292	0.27904	Ras-related protein rab-11.1 [Source:UniProtKB/Swiss-Prot;Acc:O01803]
WBGene00004488	rps-19	71914.1	1.37235	0.555798	2.46915	0.0135434	0.27904	40S ribosomal protein S19 [Source:UniProtKB/Swiss-Prot;Acc:O18650]
WBGene00004995	spp-10	11054.9	0.444929	0.179955	2.47245	0.013419	0.27904	SaPosin-like Protein family [Source:UniProtKB/TrEMBL;Acc:Q18276]
WBGene00009024	F21G4.3	12.0755	-1.64994	0.666768	-2.47453	0.013341	0.27904
WBGene00009576	F40F8.3	474.497	1.17399	0.474275	2.47534	0.0133111	0.27904
WBGene00009712	F44G4.2	5187.51	1.0814	0.437888	2.46958	0.0135271	0.27904	Probable NADH dehydrogenase [ubiquinone] 1 beta subcomplex subunit 2, mitochondrial [Source:UniProtKB/Swiss-Prot;Acc:Q20412]
WBGene00012740	slc-25A46	2022.31	0.677379	0.274047	2.47177	0.0134448	0.27904	SLC (SoLute Carrier) homolog [Source:UniProtKB/TrEMBL;Acc:Q9U2J0]
WBGene00013887	nspa-5	8.76568	3.64057	1.47424	2.46946	0.0135317	0.27904	Nematode Specific Peptide family, group A [Source:UniProtKB/TrEMBL;Acc:G5EDP8]
WBGene00015541	C06E7.4	501.476	-0.849093	0.343423	-2.47244	0.0134194	0.27904
WBGene00017308	F09F9.3	31.1168	1.35996	0.549877	2.47321	0.0133906	0.27904
WBGene00018712	F52G3.4	3.40602	2.4483	0.991505	2.46927	0.0135388	0.27904
WBGene00019913	R06B10.2	36.3551	-1.03161	0.417475	-2.47108	0.0134707	0.27904	Protein-tyrosine-phosphatase [Source:UniProtKB/TrEMBL;Acc:O44874]
WBGene00020089	R119.3	2252.51	1.2179	0.492885	2.47097	0.0134747	0.27904
WBGene00020831	T26C12.1	5610.4	0.695622	0.281363	2.47233	0.0134237	0.27904	Acetolactate synthase-like protein [Source:UniProtKB/Swiss-Prot;Acc:O61856]
WBGene00021693	Y48G8AR.2	86.6965	0.629521	0.254842	2.47023	0.0135024	0.27904
WBGene00023493	nspc-12	4.09994	-3.90335	1.57636	-2.47617	0.01328	0.27904	Nematode Specific Peptide family, group C [Source:UniProtKB/TrEMBL;Acc:G5EC48]
WBGene00012168	W01A8.6	188.309	-1.13922	0.461719	-2.46733	0.0136123	0.280149
WBGene00010913	M110.3	1433.34	0.480757	0.194915	2.4665	0.0136441	0.280186
WBGene00014826	R13H4.2	2419.58	1.08839	0.441233	2.4667	0.0136365	0.280186
WBGene00001749	gst-1	8062.7	0.620381	0.251684	2.46492	0.0137044	0.280962	Glutathione S-transferase P [Source:UniProtKB/Swiss-Prot;Acc:P10299]
WBGene00006927	vit-3	30677.1	1.24133	0.503639	2.46472	0.0137121	0.280962	Vitellogenin-3 [Source:UniProtKB/Swiss-Prot;Acc:Q9N4J2]
WBGene00000737	col-164	51.301	2.94575	1.19577	2.46348	0.0137594	0.281136	COLlagen [Source:UniProtKB/TrEMBL;Acc:Q22651]
WBGene00001720	grl-11	20.487	1.97583	0.802927	2.46078	0.0138635	0.281136	GRound-Like (Grd related) [Source:UniProtKB/TrEMBL;Acc:Q9NA23]
WBGene00002102	ins-19	468.955	2.23538	0.908379	2.46085	0.0138609	0.281136	INSulin related [Source:UniProtKB/TrEMBL;Acc:Q71UE4]
WBGene00006383	taf-2	1989.58	0.699217	0.283808	2.46369	0.0137514	0.281136	Transcription initiation factor TFIID subunit 2 [Source:UniProtKB/Swiss-Prot;Acc:Q9TYN3]
WBGene00008302	pals-38	14.724	-1.603	0.650977	-2.46245	0.0137993	0.281136	Protein containing ALS2cr12 (ALS2CR12) domain [Source:UniProtKB/TrEMBL;Acc:Q18826]
WBGene00010086	F55B11.4	3893.69	1.21169	0.492834	2.45861	0.0139474	0.281136
WBGene00011582	ntr-1	25.6719	1.11569	0.453078	2.46246	0.0137988	0.281136	Nematocin receptor 1 [Source:UniProtKB/Swiss-Prot;Acc:O02300]
WBGene00013579	Y79H2A.2	387.9	1.02886	0.418286	2.45969	0.0139056	0.281136
WBGene00015205	moa-2	1518.9	1.20536	0.490339	2.45821	0.0139631	0.281136
WBGene00015356	tag-278	296.308	-1.02106	0.415278	-2.45873	0.0139428	0.281136	Putative protein tag-278 [Source:UniProtKB/Swiss-Prot;Acc:Q11102]
WBGene00016553	mir-8199	31.0703	1.05372	0.428298	2.46025	0.0138841	0.281136
WBGene00017294	F09E10.1	155.237	2.03649	0.82727	2.4617	0.0138282	0.281136
WBGene00020399	ztf-4	2894.51	0.485313	0.197274	2.46009	0.0138902	0.281136	Zinc finger putative Transcription Factor family [Source:UniProtKB/TrEMBL;Acc:Q9TZI2]
WBGene00021844	Y54E10BR.5	5880.51	0.562077	0.228588	2.45891	0.0139359	0.281136	Signal peptidase complex catalytic subunit SEC11 [Source:UniProtKB/TrEMBL;Acc:Q9N3D0]
WBGene00044891	T07C4.12	944.268	0.802497	0.326503	2.45786	0.0139769	0.281136
WBGene00044921	F53C11.9	281.83	0.863	0.35085	2.45974	0.0139036	0.281136
WBGene00194727	C18D11.10	3.51013	2.62561	1.06824	2.45789	0.0139755	0.281136
WBGene00044339	nspc-4	250.912	0.955383	0.388781	2.45738	0.0139954	0.281204	Nematode Specific Peptide family, group C [Source:UniProtKB/TrEMBL;Acc:Q4TTA4]
WBGene00004990	spp-5	28385.5	1.0719	0.436559	2.45534	0.014075	0.281989	SaPosin-like Protein family [Source:UniProtKB/TrEMBL;Acc:Q86FL8]
WBGene00011147	R08D7.7	162.563	-0.837082	0.340932	-2.45527	0.0140777	0.281989	Uncharacterized sugar kinase R08D7.7 [Source:UniProtKB/Swiss-Prot;Acc:P30646]
WBGene00013301	Y57G11C.3	3796.18	0.440851	0.179614	2.45443	0.0141108	0.281989	Putative 6-phosphogluconolactonase [Source:UniProtKB/Swiss-Prot;Acc:O18229]
WBGene00019278	K01A2.3	75.2026	-1.07441	0.437712	-2.45461	0.0141037	0.281989
WBGene00019477	K07C11.4	1026.54	-0.680056	0.277014	-2.45495	0.0140902	0.281989	Carboxylic ester hydrolase [Source:UniProtKB/TrEMBL;Acc:Q21266]
WBGene00220228	Y111B2A.34	10.6204	-2.22405	0.90627	-2.45407	0.0141251	0.281989
WBGene00010814	M01F1.8	1274	0.57263	0.233483	2.45255	0.0141846	0.282166
WBGene00013023	Y48G10A.6	152.539	1.59069	0.648476	2.45297	0.0141684	0.282166
WBGene00017794	mltn-13	31.0188	-1.19464	0.487225	-2.45192	0.0142097	0.282166	MLt-TeN (Mlt-10) related [Source:UniProtKB/TrEMBL;Acc:G4SC46]
WBGene00020755	grl-31	8.95269	2.13071	0.868915	2.45215	0.0142004	0.282166	GRound-Like (Grd related) [Source:UniProtKB/TrEMBL;Acc:Q9TXS7]
WBGene00022180	Y71H2AM.15	407.676	-0.85323	0.347896	-2.45254	0.0141851	0.282166
WBGene00017055	D2062.1	17.2002	3.48635	1.42248	2.45089	0.0142505	0.282675
WBGene00016669	ilys-2	62.544	1.37277	0.560238	2.45034	0.0142722	0.282805	Invertebrate-type lysozyme 2 [Source:UniProtKB/Swiss-Prot;Acc:O76358]
WBGene00009505	F37B12.3	2798.72	0.54952	0.224344	2.44945	0.0143075	0.282829
WBGene00015267	chin-1	3472.45	0.894917	0.365314	2.44972	0.0142966	0.282829	CHImaeriN (Rac-GTPase-activating protein) homolog [Source:UniProtKB/TrEMBL;Acc:Q965N4]
WBGene00018267	F41C3.1	12.3112	2.58442	1.05523	2.44916	0.0143189	0.282829
WBGene00012187	rpb-11	2539.35	1.12267	0.458585	2.44812	0.0143602	0.283045	Probable DNA-directed RNA polymerase II subunit RPB11 [Source:UniProtKB/Swiss-Prot;Acc:Q9XVH6]
WBGene00016130	C26B2.8	97.3396	-1.12828	0.460877	-2.44813	0.0143601	0.283045
WBGene00010893	cutl-9	70.0251	-0.883768	0.361096	-2.44746	0.0143866	0.283266	CUTiclin-Like [Source:UniProtKB/TrEMBL;Acc:Q21573]
WBGene00001977	hmg-12	13395.8	0.845777	0.345746	2.44624	0.0144356	0.283357	HMG; High mobility group protein I beta [Source:UniProtKB/TrEMBL;Acc:G5EDQ2]
WBGene00012095	pssy-2	2682.98	0.693342	0.283415	2.44639	0.0144297	0.283357	PhosphatidylSerine SYnthase [Source:UniProtKB/TrEMBL;Acc:O18143]
WBGene00194848	T27D12.6	22.4337	1.27287	0.520343	2.44621	0.0144369	0.283357
WBGene00003443	msp-50	224.308	4.27619	1.74888	2.4451	0.0144814	0.283728	Major sperm protein 19/31/40/45/50/51/53/59/61/65/81/113/142 [Source:UniProtKB/Swiss-Prot;Acc:P53017]
WBGene00013496	Y70D2A.1	70.4099	-1.21883	0.498502	-2.44498	0.0144862	0.283728
WBGene00021546	laat-1	2813.35	0.703276	0.287695	2.44452	0.0145046	0.283791	Lysosomal amino acid transporter 1 [Source:UniProtKB/Swiss-Prot;Acc:Q95XZ6]
WBGene00008091	C44F1.1	194.128	-0.831154	0.340181	-2.44327	0.0145548	0.283841
WBGene00013671	Y105E8A.11	795.992	1.17986	0.482818	2.44369	0.0145379	0.283841
WBGene00019411	K05F1.10	237.688	-0.677809	0.277401	-2.44343	0.0145483	0.283841
WBGene00195239	ZK1127.13	1267.24	1.07121	0.438493	2.44294	0.014568	0.283841
WBGene00002275	lem-2	5688.08	0.791832	0.324373	2.44111	0.0146421	0.284986	LEM protein 2 [Source:UniProtKB/Swiss-Prot;Acc:Q9XTB5]
WBGene00016587	C42C1.9	79.3907	1.55511	0.637907	2.43782	0.0147759	0.287169
WBGene00021467	Y39G10AR.9	3408.67	0.681158	0.279438	2.4376	0.0147851	0.287169
WBGene00006047	ssp-19	19.1252	4.4714	1.8353	2.43634	0.0148369	0.287576	Sperm-specific class P protein 19 [Source:UniProtKB/Swiss-Prot;Acc:O01829]
WBGene00045473	F30A10.14	392.387	0.739595	0.303523	2.4367	0.014822	0.287576
WBGene00006759	unc-22	1886.82	-1.00575	0.413211	-2.43397	0.0149341	0.288271	Twitchin [Source:UniProtKB/Swiss-Prot;Acc:Q23551]
WBGene00009122	tct-1	38174.9	0.947497	0.389342	2.43359	0.01495	0.288271	Translationally-controlled tumor protein homolog [Source:UniProtKB/Swiss-Prot;Acc:Q93573]
WBGene00017759	sucl-2	6132.16	0.877777	0.360681	2.43367	0.0149467	0.288271	Succinate--CoA ligase [ADP/GDP-forming] subunit alpha, mitochondrial [Source:UniProtKB/TrEMBL;Acc:O02642]
WBGene00020929	W02C12.2	305.897	1.21309	0.498253	2.4347	0.0149043	0.288271
WBGene00185078	F40G9.17	997.674	1.21027	0.497172	2.43431	0.0149202	0.288271
WBGene00011110	prdx-3	7039.52	1.04602	0.429907	2.43312	0.0149693	0.288345	Probable peroxiredoxin prdx-3 [Source:UniProtKB/Swiss-Prot;Acc:Q21824]
WBGene00019658	K11H12.1	624.229	0.984302	0.404841	2.43133	0.0150435	0.289476	Putative bolA-like protein K11H12.1 [Source:UniProtKB/Swiss-Prot;Acc:P91375]
WBGene00000181	ard-1	6501.82	0.918842	0.378035	2.43058	0.0150748	0.28948	Alcohol/Ribitol Dehydrogenase family [Source:UniProtKB/TrEMBL;Acc:Q19102]
WBGene00023450	T12D8.10	1106.69	1.27954	0.526418	2.43066	0.0150714	0.28948
WBGene00001412	fem-2	5147.04	0.727233	0.2993	2.42978	0.0151079	0.289652	Ca(2+)/calmodulin-dependent protein kinase phosphatase [Source:UniProtKB/Swiss-Prot;Acc:P49594]
WBGene00012920	Y46G5A.35	522.315	0.830073	0.341752	2.42887	0.0151459	0.289652
WBGene00021239	Y20F4.4	1053.18	0.531422	0.21875	2.42936	0.0151254	0.289652
WBGene00021334	vps-4	5688.44	0.557653	0.229566	2.42916	0.0151338	0.289652	Related to yeast Vacuolar Protein Sorting factor [Source:UniProtKB/TrEMBL;Acc:Q9BL83]
WBGene00021104	W09B6.4	983.861	0.713773	0.293962	2.42811	0.0151776	0.28996
WBGene00022695	ZK328.6	110.106	-0.799492	0.329409	-2.42705	0.0152223	0.290517	Uncharacterized F-box protein ZK328.6 [Source:UniProtKB/Swiss-Prot;Acc:Q8TA81]
WBGene00012928	aakb-2	1127.08	0.670374	0.276395	2.42542	0.0152907	0.291226	AMP-Activated Kinase Beta subunit [Source:UniProtKB/TrEMBL;Acc:Q9NAH7]
WBGene00021060	dct-11	874.527	0.779388	0.321307	2.42568	0.0152798	0.291226	DAF-16/FOXO Controlled, germline Tumor affecting [Source:UniProtKB/TrEMBL;Acc:Q23190]
WBGene00014206	nit-1	582.937	-0.811561	0.334684	-2.42486	0.0153144	0.291379	NITrilase [Source:UniProtKB/TrEMBL;Acc:Q23384]
WBGene00015480	C05D10.4	614.498	-0.639402	0.263762	-2.42417	0.0153435	0.291636
WBGene00022077	vamp-7	1214.43	0.711367	0.29374	2.42176	0.0154457	0.29328	VAMP (Vesicle Associated Membrane Protein) homolog [Source:UniProtKB/TrEMBL;Acc:Q95XH1]
WBGene00044068	syd-9	334.517	-0.675228	0.278869	-2.42131	0.0154649	0.293345
WBGene00001486	frh-1	771.879	0.645094	0.266634	2.4194	0.0155461	0.293692	Frataxin, mitochondrial [Source:UniProtKB/Swiss-Prot;Acc:Q9TY03]
WBGene00003438	msp-45	165.786	4.28676	1.77208	2.41905	0.0155609	0.293692	Major sperm protein 19/31/40/45/50/51/53/59/61/65/81/113/142 [Source:UniProtKB/Swiss-Prot;Acc:P53017]
WBGene00011773	ttr-53	2269.1	0.582423	0.240692	2.41979	0.0155295	0.293692	TransThyretin-Related family domain [Source:UniProtKB/TrEMBL;Acc:Q22500]
WBGene00016607	C43E11.9	2789.23	0.837152	0.346069	2.41903	0.0155619	0.293692	60S ribosome subunit biogenesis protein NIP7 homolog [Source:UniProtKB/TrEMBL;Acc:P91154]
WBGene00017160	F01F1.3	245.406	0.569717	0.235493	2.41925	0.0155523	0.293692
WBGene00000644	col-68	104.035	1.1199	0.463367	2.41687	0.0156548	0.293962	COLlagen [Source:UniProtKB/TrEMBL;Acc:O44796]
WBGene00001637	gly-12	287.318	-0.728959	0.301814	-2.41525	0.0157242	0.293962	GLYcosylation related; UDP-N-acetylglucosamine:a-3-D-mannoside b-1,2-N-acetylglucosaminyltransferase I [Source:UniProtKB/TrEMBL;Acc:G5EBG7]
WBGene00004243	puf-7	1178.38	0.818375	0.339264	2.4122	0.0158564	0.293962	Pumilio domain-containing protein 7 [Source:UniProtKB/Swiss-Prot;Acc:O44169]
WBGene00006586	tni-4	1513.9	-0.656537	0.271915	-2.41449	0.0157573	0.293962	Troponin I 4 [Source:UniProtKB/Swiss-Prot;Acc:O44572]
WBGene00008929	F18A11.2	150.404	-0.880328	0.364613	-2.41442	0.0157604	0.293962
WBGene00009337	uig-1	501.005	-0.679402	0.280977	-2.418	0.0156061	0.293962	UNC-112-Interacting Guanine nucleotide exchange factor [Source:UniProtKB/TrEMBL;Acc:D4YWB9]
WBGene00010974	bbs-5	101.252	0.652253	0.270232	2.41368	0.0157924	0.293962	Bardet-Biedl syndrome 5 protein homolog [Source:UniProtKB/Swiss-Prot;Acc:Q21626]
WBGene00011768	oac-46	638.935	-0.654211	0.271154	-2.41269	0.0158353	0.293962	O-ACyltransferase homolog [Source:UniProtKB/TrEMBL;Acc:Q94056]
WBGene00013853	ZC116.1	182.24	-1.22609	0.507385	-2.41648	0.0156714	0.293962
WBGene00014954	Y102A5C.5	636.831	1.00291	0.415842	2.41176	0.0158757	0.293962
WBGene00017119	timm-17B.1	5453.96	0.985376	0.408297	2.41338	0.0158053	0.293962	Probable mitochondrial import inner membrane translocase subunit Tim17 [Source:UniProtKB/Swiss-Prot;Acc:O44477]
WBGene00017599	F19F10.3	221.936	0.806059	0.334147	2.41229	0.0158527	0.293962
WBGene00018289	F41E6.8	22.7212	2.44293	1.01227	2.41331	0.0158083	0.293962
WBGene00018568	F47E1.4	147.781	0.9307	0.385901	2.41176	0.0158758	0.293962	Solute carrier organic anion transporter family member [Source:UniProtKB/TrEMBL;Acc:Q95ZT3]
WBGene00020554	T19A5.3	366.871	-1.21523	0.503554	-2.41331	0.0158082	0.293962
WBGene00021425	ppgn-1	1013.9	0.521746	0.216325	2.41186	0.0158714	0.293962	ParaPleGiN AAA protease family; Paraplegin [Source:UniProtKB/TrEMBL;Acc:G5EDB6]
WBGene00022165	Y71H2AL.2	56.9406	0.754567	0.312707	2.41301	0.0158212	0.293962
WBGene00045132	ZK643.9	4.3193	-3.70203	1.53136	-2.41748	0.0156284	0.293962
WBGene00045215	ceh-63	20.8019	1.05074	0.434835	2.4164	0.0156747	0.293962	C. Elegans Homeobox [Source:UniProtKB/TrEMBL;Acc:A3FPJ2]
WBGene00004467	rpn-11	9705.12	0.538199	0.223341	2.40977	0.0159627	0.294435	26S proteasome non-ATPase regulatory subunit 14 [Source:UniProtKB/Swiss-Prot;Acc:O76577]
WBGene00013762	Y113G7B.12	142.297	-0.905147	0.37565	-2.40955	0.0159723	0.294435
WBGene00015665	C10A4.4	73.1049	1.13687	0.471822	2.40953	0.0159729	0.294435
WBGene00018328	F42A6.6	793.135	0.951351	0.394696	2.41034	0.0159377	0.294435
WBGene00019863	R04A9.3	117.446	-0.849432	0.352554	-2.40937	0.0159803	0.294435
WBGene00007603	C15C6.4	909.663	0.547559	0.227389	2.40803	0.0160388	0.29464
WBGene00008020	C38H2.3	233.869	0.733214	0.304462	2.40823	0.0160302	0.29464
WBGene00014164	lact-2	2480.72	0.579649	0.240706	2.40812	0.0160351	0.29464	Beta-lactamase domain-containing protein 2 [Source:UniProtKB/Swiss-Prot;Acc:Q09621]
WBGene00002219	klp-7	5284.46	0.691325	0.28739	2.40553	0.0161489	0.295209	Kinesin-like protein [Source:UniProtKB/TrEMBL;Acc:G5ED75]
WBGene00006660	twk-5	370.838	1.13379	0.471252	2.40592	0.0161319	0.295209	TWiK family of potassium channels [Source:UniProtKB/TrEMBL;Acc:Q17481]
WBGene00021843	Y54E10BR.4	3386.49	0.400366	0.166417	2.40581	0.0161367	0.295209
WBGene00050913	T12B5.14	59.95	1.61157	0.669757	2.4062	0.0161193	0.295209
WBGene00220207	Y75B8A.62	14.1686	-1.71761	0.71393	-2.40585	0.016135	0.295209
WBGene00006743	unc-3	75.8962	-0.663216	0.275781	-2.40486	0.0161786	0.295329	Transcription factor unc-3 [Source:UniProtKB/Swiss-Prot;Acc:Q93705]
WBGene00011017	R04F11.5	1236.34	0.611995	0.254506	2.40464	0.0161882	0.295329
WBGene00018462	F45E1.1	93.718	-0.96767	0.402533	-2.40395	0.0162189	0.295329
WBGene00018961	mrps-16	1765.72	1.19034	0.495102	2.40422	0.0162069	0.295329	Probable 28S ribosomal protein S16, mitochondrial [Source:UniProtKB/Swiss-Prot;Acc:Q10129]
WBGene00011081	R07B1.9	129.516	-1.15113	0.479247	-2.40196	0.0163075	0.296075
WBGene00013532	Y73F8A.27	2213.4	1.03341	0.430225	2.40202	0.0163047	0.296075
WBGene00013779	Y116A8B.1	10.0558	1.74673	0.727178	2.40207	0.0163025	0.296075
WBGene00022072	cpg-9	1790.21	1.851	0.770786	2.40145	0.0163304	0.296202	Chondroitin proteoglycan 9 [Source:UniProtKB/Swiss-Prot;Acc:Q95XP7]
WBGene00020389	T10B5.3	4870.34	0.765128	0.318665	2.40104	0.0163484	0.296241
WBGene00004999	spp-14	11090.9	1.01553	0.423301	2.39907	0.0164366	0.296589	SaPosin-like Protein family [Source:UniProtKB/TrEMBL;Acc:Q2XN18]
WBGene00009947	F52H3.5	997.744	-0.744193	0.310053	-2.40021	0.0163856	0.296589	Tetratricopeptide repeat protein 36 homolog [Source:UniProtKB/Swiss-Prot;Acc:Q20683]
WBGene00017219	F07F6.7	232.241	1.02444	0.426907	2.39969	0.0164091	0.296589
WBGene00021465	ekl-7	1771.69	0.72013	0.300199	2.39884	0.0164471	0.296589
WBGene00044213	Y102A5C.36	274.963	1.13716	0.474026	2.39894	0.0164427	0.296589
WBGene00000671	col-96	279.419	1.08865	0.454883	2.39325	0.0166999	0.296591	COLlagen [Source:UniProtKB/TrEMBL;Acc:Q86MP2]
WBGene00000691	col-117	741.558	2.7652	1.15528	2.39354	0.0166865	0.296591	COLlagen; COLlagen structural [Source:UniProtKB/TrEMBL;Acc:G5EDG6]
WBGene00001397	fat-5	4064.61	1.11362	0.465714	2.3912	0.0167933	0.296591	Delta(9)-fatty-acid desaturase fat-5 [Source:UniProtKB/Swiss-Prot;Acc:G5ED44]
WBGene00002032	htp-1	2974.67	0.554379	0.23169	2.39276	0.0167221	0.296591	Him-Three Paralog [Source:UniProtKB/TrEMBL;Acc:Q20305]
WBGene00002253	lbp-1	7438.13	1.09044	0.455587	2.39348	0.0166893	0.296591	Fatty acid-binding protein homolog 1 [Source:UniProtKB/Swiss-Prot;Acc:Q20223]
WBGene00004267	rab-3	548.623	-0.758574	0.317569	-2.38869	0.0169085	0.296591	Ras-related protein Rab-3 [Source:UniProtKB/Swiss-Prot;Acc:Q94986]
WBGene00004988	spp-3	6772.87	1.37399	0.574465	2.39177	0.0167673	0.296591	SaPosin-like Protein family [Source:UniProtKB/TrEMBL;Acc:Q22336]
WBGene00006053	ssq-4	402.438	3.53795	1.48077	2.38926	0.0168821	0.296591	Sperm-Specific family, class Q [Source:UniProtKB/TrEMBL;Acc:Q23062]
WBGene00009650	ccnk-1	2652.08	0.602546	0.251338	2.39736	0.0165138	0.296591	CyCliN K [Source:UniProtKB/TrEMBL;Acc:O17869]
WBGene00010547	K03H1.12	38.9608	2.79581	1.1673	2.39512	0.0166148	0.296591
WBGene00011335	T01E8.8	474.553	0.483434	0.20231	2.38956	0.0168684	0.296591
WBGene00011561	ttr-15	23657.7	0.468489	0.195619	2.39491	0.0166246	0.296591	Transthyretin-like protein 15 [Source:UniProtKB/Swiss-Prot;Acc:Q22288]
WBGene00011803	T16G12.1	588.237	-1.17385	0.490351	-2.3939	0.0166703	0.296591
WBGene00013896	ZC443.1	137.888	-0.978242	0.40877	-2.39313	0.0167052	0.296591
WBGene00013996	ZK550.2	415.648	0.716888	0.299455	2.39397	0.016667	0.296591
WBGene00014184	ZK1025.4	33.1653	-1.81675	0.758988	-2.39365	0.0166815	0.296591
WBGene00015152	B0348.2	48.8271	1.46736	0.612275	2.39658	0.016549	0.296591
WBGene00015497	nhr-76	532.043	0.6768	0.282713	2.39395	0.0166681	0.296591	Nuclear Hormone Receptor family [Source:UniProtKB/TrEMBL;Acc:Q65CM0]
WBGene00015932	C17H12.6	422.923	0.664384	0.278109	2.38893	0.0168973	0.296591
WBGene00018099	ztf-28	714.041	0.593217	0.247945	2.39254	0.0167322	0.296591	Zinc finger putative Transcription Factor family [Source:UniProtKB/TrEMBL;Acc:O76398]
WBGene00018361	F42G8.10	6742.94	1.28852	0.537359	2.39787	0.0164907	0.296591
WBGene00019058	F58F9.4	74.6447	-0.95223	0.39835	-2.39044	0.0168284	0.296591
WBGene00019077	zipt-11	3421.56	0.632853	0.264833	2.38963	0.0168653	0.296591	Zrt (ZRT), Irt-(IRT-) like Protein Transporter [Source:UniProtKB/TrEMBL;Acc:P91354]
WBGene00019524	K08D9.2	10.1295	-2.02772	0.845455	-2.39838	0.0164678	0.296591
WBGene00021922	atg-3	2461.78	0.68707	0.287197	2.39233	0.0167417	0.296591	AuTophaGy (Yeast Atg homolog) [Source:UniProtKB/TrEMBL;Acc:U4PRD2]
WBGene00022022	Y61A9LA.11	1024.95	0.551089	0.230627	2.38953	0.01687	0.296591
WBGene00077450	K06B4.15	28.2766	2.25804	0.944195	2.3915	0.0167796	0.296591
WBGene00194788	R02D5.10	14.7165	2.20981	0.924722	2.3897	0.0168621	0.296591
WBGene00235319	F44E7.17	179.277	-0.668061	0.278879	-2.39553	0.0165966	0.296591
WBGene00019607	K10B2.4	1928.45	1.07683	0.450917	2.3881	0.0169358	0.296594
WBGene00195050	T22D1.17	48.2047	0.828854	0.347092	2.388	0.0169405	0.296594
WBGene00000817	csn-5	3779.73	0.497391	0.208454	2.3861	0.0170281	0.29735	COP9 signalosome complex subunit 5 [Source:UniProtKB/Swiss-Prot;Acc:P91001]
WBGene00008849	try-10	264.484	0.869255	0.364311	2.38603	0.0170315	0.29735	TRYpsin-like protease [Source:UniProtKB/TrEMBL;Acc:E1B6T7]
WBGene00017727	F22H10.3	7663.88	1.58058	0.662272	2.3866	0.017005	0.29735
WBGene00022515	ttr-48	4347.89	0.503844	0.211271	2.38483	0.0170871	0.298041	TransThyretin-Related family domain [Source:UniProtKB/TrEMBL;Acc:Q23378]
WBGene00000522	clc-1	2465.19	1.49526	0.627239	2.38387	0.0171315	0.298258	CLaudin-like in Caenorhabditis [Source:UniProtKB/TrEMBL;Acc:Q93198]
WBGene00013784	Y116A8C.3	297.414	0.79243	0.332399	2.38397	0.0171268	0.298258
WBGene00011934	T22H2.4	19.6659	1.2565	0.527798	2.38065	0.0172821	0.300318
WBGene00012997	Y48C3A.18	867.386	1.23263	0.517727	2.38084	0.0172732	0.300318
WBGene00001734	grl-25	520.592	3.40019	1.4288	2.37974	0.0173247	0.300437	GRound-Like (Grd related) [Source:UniProtKB/TrEMBL;Acc:G5EDQ6]
WBGene00013158	Y53F4B.11	192.862	2.31925	0.974829	2.37913	0.0173534	0.300437
WBGene00016395	C34B2.10	2266.94	0.742118	0.311842	2.37979	0.0173224	0.300437	Probable signal peptidase complex subunit 1 [Source:UniProtKB/Swiss-Prot;Acc:O44953]
WBGene00018932	mrpl-2	1621.55	0.660595	0.277648	2.37925	0.0173479	0.300437	Mitochondrial Ribosomal Protein, Large [Source:UniProtKB/TrEMBL;Acc:U4PFC3]
WBGene00006163	str-112	14.1531	1.53316	0.64571	2.37438	0.0175785	0.300591	Seven TM Receptor [Source:UniProtKB/TrEMBL;Acc:O16913]
WBGene00007625	C16C10.4	5356.72	0.903594	0.380592	2.37418	0.017588	0.300591	Probable histone deacetylase complex subunit SAP18 [Source:UniProtKB/Swiss-Prot;Acc:Q09250]
WBGene00008211	C49F5.7	818.426	1.20668	0.507479	2.37779	0.0174167	0.300591
WBGene00008792	F14D7.5	8.86201	1.96916	0.828383	2.37711	0.0174489	0.300591
WBGene00009463	F36D1.4	14.6593	3.21621	1.35348	2.37626	0.0174892	0.300591
WBGene00012585	lips-15	779.988	1.02003	0.429447	2.37522	0.0175386	0.300591	LIPaSe related [Source:UniProtKB/TrEMBL;Acc:Q9NAK4]
WBGene00013602	Y87G2A.16	86.7936	-1.02282	0.430694	-2.37482	0.0175573	0.300591
WBGene00015074	natc-2	3744.6	0.510331	0.214708	2.37687	0.0174604	0.300591	N-alpha-AcetylTransferase C complex subunit [Source:UniProtKB/TrEMBL;Acc:O16486]
WBGene00015622	C09B8.3	34.5838	-1.53455	0.645183	-2.37847	0.0173845	0.300591
WBGene00017348	F10E7.6	1064.39	0.467888	0.197015	2.37488	0.0175546	0.300591
WBGene00021370	nape-2	711.19	0.654595	0.27568	2.37448	0.0175737	0.300591	N-Acyl Phosphatidyl Ethanolamine specific phospholipase D (NAPE-PLD) homolog [Source:UniProtKB/TrEMBL;Acc:Q965X8]
WBGene00044371	ZC239.20	85.897	0.97515	0.410226	2.3771	0.0174492	0.300591
WBGene00045305	ZC250.4	882.679	0.716686	0.301542	2.37673	0.0174667	0.300591
WBGene00045417	Y37H2A.13	266.708	2.07574	0.874021	2.37494	0.017552	0.300591
WBGene00001879	his-5	13.8698	1.99322	0.839702	2.37372	0.0176098	0.300689	Histone H4 [Source:UniProtKB/Swiss-Prot;Acc:P62784]
WBGene00007589	erg-28	515.719	0.669542	0.282134	2.37313	0.017638	0.300895	Probable ergosterol biosynthetic protein 28 homolog [Source:UniProtKB/Swiss-Prot;Acc:G5EEQ9]
WBGene00003081	lsm-7	3240.17	1.04746	0.441468	2.37268	0.0176594	0.300985	LSM Sm-like protein [Source:UniProtKB/TrEMBL;Acc:Q23543]
WBGene00004481	rps-12	49912.7	1.61055	0.67925	2.37107	0.0177369	0.301479	40S ribosomal protein S12 [Source:UniProtKB/Swiss-Prot;Acc:P49196]
WBGene00007745	C26D10.4	93.6836	-0.736871	0.310733	-2.37139	0.0177212	0.301479
WBGene00009514	F37H8.5	5701.52	0.604352	0.254822	2.37167	0.0177081	0.301479	GILT-like protein F37H8.5 [Source:UniProtKB/Swiss-Prot;Acc:O17861]
WBGene00000209	asg-1	8152.69	1.11994	0.47267	2.36938	0.0178178	0.301687	Probable ATP synthase subunit g 1, mitochondrial [Source:UniProtKB/Swiss-Prot;Acc:P90921]
WBGene00000627	col-50	221.137	3.63867	1.53742	2.36673	0.0179459	0.301687	COLlagen [Source:UniProtKB/TrEMBL;Acc:O01662]
WBGene00006827	unc-98	801.33	-0.378271	0.159847	-2.36645	0.0179595	0.301687	Zinc finger protein unc-98 [Source:UniProtKB/Swiss-Prot;Acc:Q19203]
WBGene00012891	sorb-1	234.671	-0.837367	0.353538	-2.36854	0.0178586	0.301687	SORBin homolog [Source:UniProtKB/TrEMBL;Acc:G5EC32]
WBGene00013556	Y75B8A.23	70.3543	1.58066	0.667271	2.36884	0.0178441	0.301687
WBGene00018419	F44E2.6	1397.31	0.931497	0.393452	2.3675	0.0179087	0.301687
WBGene00018468	cla-1	138.247	-1.02297	0.432037	-2.36778	0.0178954	0.301687	LOW QUALITY PROTEIN: Uncharacterized protein CELE_F45E4.3 [Source:RefSeq peptide;Acc:NP_001294148]
WBGene00019751	M03D4.4	138.108	-0.86914	0.367219	-2.36682	0.0179417	0.301687
WBGene00020588	T19H12.2	23299.5	1.048	0.442359	2.36912	0.0178307	0.301687	Acidic leucine-rich nuclear phosphoprotein 32-related protein 2 [Source:UniProtKB/Swiss-Prot;Acc:O01615]
WBGene00021841	Y54E10BR.2	1277.14	0.880304	0.371971	2.36659	0.0179528	0.301687
WBGene00022276	nlp-40	10845.4	1.07974	0.455921	2.36827	0.0178716	0.301687	Neuropeptide-like peptides nlp-40 Peptide P1 Peptide P2 Peptide P3 Peptide P4 [Source:UniProtKB/Swiss-Prot;Acc:Q9N4D8]
WBGene00219700	linc-6	91.2973	1.18655	0.500969	2.36851	0.0178597	0.301687	NA
WBGene00235308	C37C3.17	50.4117	1.47106	0.620601	2.37037	0.0177701	0.301687
WBGene00003764	nlp-26	245.27	1.42543	0.602561	2.36561	0.0180002	0.301761	Neuropeptide-Like Protein [Source:UniProtKB/TrEMBL;Acc:Q9XWN4]
WBGene00016616	C43H6.3	858.87	0.994722	0.420537	2.36536	0.0180124	0.301761
WBGene00021965	Y57G7A.1	520.461	0.830629	0.351094	2.36583	0.0179897	0.301761
WBGene00022402	lmtr-2	2210.27	1.0365	0.438281	2.36492	0.018034	0.301851	Ragulator complex protein LAMTOR2 homolog [Source:UniProtKB/Swiss-Prot;Acc:Q9N2U6]
WBGene00007309	C04G2.10	247.565	0.739529	0.312858	2.36378	0.0180893	0.302506
WBGene00004429	rpl-17	89780.9	1.22566	0.51878	2.36259	0.0181478	0.302939	60S ribosomal protein L17 [Source:UniProtKB/Swiss-Prot;Acc:Q9BL19]
WBGene00014472	MTCE.33	1674.31	1.19448	0.505544	2.36275	0.0181397	0.302939
WBGene00001234	eif-6	9105.16	0.742692	0.314639	2.36046	0.0182523	0.303718	Eukaryotic translation initiation factor 6 [Source:UniProtKB/Swiss-Prot;Acc:O62106]
WBGene00006052	ssq-3	123.168	3.71459	1.57317	2.36122	0.018215	0.303718	Sperm-Specific family, class Q [Source:UniProtKB/TrEMBL;Acc:Q23347]
WBGene00010397	suox-1	955.547	-0.393719	0.166812	-2.36025	0.0182625	0.303718	SUlfite OXidase [Source:UniProtKB/TrEMBL;Acc:Q9XTQ8]
WBGene00013148	Y53F4A.2	25.6376	2.92628	1.23963	2.36061	0.0182447	0.303718
WBGene00019311	K02E7.6	255.968	-0.862692	0.365557	-2.35994	0.018278	0.303718
WBGene00255598	BE0003N10.6	38.8773	1.08402	0.459397	2.35965	0.0182921	0.303718
WBGene00001232	eif-3.I	11329	0.554981	0.235502	2.35658	0.0184439	0.304341	Eukaryotic translation initiation factor 3 subunit I [Source:UniProtKB/Swiss-Prot;Acc:Q965S8]
WBGene00003071	lrp-1	1815.5	-0.807649	0.342626	-2.35723	0.0184118	0.304341	Low-density lipoprotein receptor-related protein [Source:UniProtKB/Swiss-Prot;Acc:Q04833]
WBGene00003640	nhr-50	219.497	-0.555509	0.235719	-2.35666	0.0184403	0.304341	Nuclear Hormone Receptor family [Source:UniProtKB/TrEMBL;Acc:O62031]
WBGene00003772	nlr-1	238.212	-0.652912	0.277032	-2.35681	0.0184327	0.304341	Neurexin Like receptor [Source:UniProtKB/TrEMBL;Acc:Q19617]
WBGene00009575	F40F8.1	2784.14	0.948599	0.402531	2.35659	0.0184437	0.304341	UMP-CMP kinase 2 [Source:UniProtKB/Swiss-Prot;Acc:Q20230]
WBGene00012106	T27F6.7	1579.97	0.732017	0.310603	2.35676	0.018435	0.304341
WBGene00016055	C24D10.4	2171.17	0.520851	0.22088	2.35808	0.0183698	0.304341
WBGene00003444	msp-51	18.7837	4.48105	1.90212	2.35582	0.0184821	0.304432	Major sperm protein 19/31/40/45/50/51/53/59/61/65/81/113/142 [Source:UniProtKB/Swiss-Prot;Acc:P53017]
WBGene00021395	pnc-1	1199.88	0.807296	0.34268	2.35583	0.0184814	0.304432	Pyrazinamidase and NiCotinamidase [Source:UniProtKB/TrEMBL;Acc:A7WK39]
WBGene00006397	taf-13	1956.1	0.661727	0.281022	2.35472	0.0185368	0.305064	TAF (TBP-associated transcription factor) family [Source:UniProtKB/TrEMBL;Acc:Q17957]
WBGene00012753	Y41C4A.6	105.903	1.13024	0.480167	2.35384	0.0185806	0.305162
WBGene00043057	M142.8	1659.68	0.771493	0.327725	2.35409	0.0185683	0.305162	Protein-lysine N-methyltransferase M142.8 [Source:UniProtKB/Swiss-Prot;Acc:Q5WRN3]
WBGene00185118	K02E2.11	104.84	1.54722	0.657382	2.35362	0.0185918	0.305162
WBGene00004124	pqn-37	201.701	-0.932605	0.396617	-2.3514	0.0187028	0.305371	Prion-like-(Q/N-rich)-domain-bearing protein [Source:UniProtKB/TrEMBL;Acc:Q95ZT9]
WBGene00004742	scl-1	8.59901	3.23964	1.37764	2.35159	0.0186932	0.305371	SCP-Like extracellular protein [Source:UniProtKB/TrEMBL;Acc:Q20608]
WBGene00007112	B0035.13	1794.56	1.20952	0.514313	2.35173	0.0186866	0.305371
WBGene00009958	madd-4	338.626	-0.869917	0.369721	-2.3529	0.0186275	0.305371
WBGene00017169	F01F1.15	1400.22	0.730927	0.310843	2.35143	0.0187014	0.305371
WBGene00022864	ZK1236.5	381.346	-0.894606	0.380361	-2.35199	0.0186731	0.305371
WBGene00044298	T23B7.2	4.40943	-3.15465	1.34208	-2.35057	0.0187447	0.305787
WBGene00004348	rgs-5	523.223	-0.641414	0.272932	-2.35009	0.0187691	0.305916	Regulator of G-protein signaling rgs-5 [Source:UniProtKB/Swiss-Prot;Acc:Q10955]
WBGene00000621	col-44	60.2721	2.44676	1.04145	2.34939	0.0188043	0.305965	COLlagen [Source:UniProtKB/TrEMBL;Acc:Q20739]
WBGene00007515	C10C6.7	114.223	0.714961	0.304323	2.34935	0.0188062	0.305965
WBGene00012867	seld-1	755.766	0.520325	0.221504	2.34905	0.0188213	0.305965	Probable selenide, water dikinase [Source:UniProtKB/Swiss-Prot;Acc:O62461]
WBGene00006929	vit-5	103536	1.11109	0.473296	2.34756	0.0188969	0.306908	Vitellogenin-5 [Source:UniProtKB/Swiss-Prot;Acc:P06125]
WBGene00007322	C05B5.5	43.7	-0.859819	0.366338	-2.34706	0.0189221	0.306908	Uncharacterized F-box protein C05B5.5 [Source:UniProtKB/Swiss-Prot;Acc:P34293]
WBGene00010222	F57G12.2	34.8117	-1.09268	0.465816	-2.34574	0.0189895	0.306908
WBGene00012239	W04A8.4	1151.29	-0.785525	0.335048	-2.34451	0.019052	0.306908
WBGene00012768	eef-1B.2	24231.9	1.07409	0.457765	2.34637	0.0189571	0.306908	Probable elongation factor 1-beta/1-delta 2 [Source:UniProtKB/Swiss-Prot;Acc:Q9U2H9]
WBGene00012780	Y42A5A.5	245.957	0.584943	0.249546	2.34403	0.0190768	0.306908
WBGene00013508	Y71A12B.11	1091.76	0.829939	0.353931	2.34492	0.0190314	0.306908
WBGene00018300	F41G3.3	31.3602	-1.30631	0.55678	-2.34618	0.0189667	0.306908
WBGene00018573	oac-30	70.5059	-1.12068	0.477918	-2.34493	0.0190309	0.306908	O-ACyltransferase homolog [Source:UniProtKB/TrEMBL;Acc:P91310]
WBGene00021884	Y54G2A.19	525.599	1.03999	0.44331	2.34597	0.0189775	0.306908
WBGene00022280	Y74C10AL.2	2770.72	1.0917	0.465536	2.34503	0.0190255	0.306908
WBGene00219412	ZK381.62	11.5698	2.40516	1.02602	2.34417	0.0190694	0.306908
WBGene00011399	T03F6.3	4715.84	0.696566	0.297398	2.3422	0.0191704	0.30795	Probable glucosamine-6-phosphate isomerase [Source:UniProtKB/Swiss-Prot;Acc:Q9XVJ2]
WBGene00194642	C25H3.17	305.64	1.10219	0.470595	2.34212	0.0191746	0.30795
WBGene00022720	ZK370.6	104.571	0.699602	0.298815	2.34125	0.0192191	0.3084
WBGene00000235	baf-1	12948.7	0.752612	0.321714	2.33938	0.0193156	0.308452	Barrier-to-autointegration factor 1 [Source:UniProtKB/Swiss-Prot;Acc:Q03565]
WBGene00011108	R07E3.7	132.37	-0.655118	0.280091	-2.33895	0.0193382	0.308452
WBGene00018103	F36H5.4	368.832	0.704449	0.300942	2.34082	0.0192417	0.308452
WBGene00019117	nhr-144	82.8806	-0.865152	0.369685	-2.34024	0.0192713	0.308452
WBGene00019178	scl-12	28.8222	1.79416	0.767018	2.33914	0.0193284	0.308452	SCP-Like extracellular protein [Source:UniProtKB/TrEMBL;Acc:Q9N5N3]
WBGene00022752	ZK484.6	53.2235	0.967783	0.413726	2.33919	0.0193256	0.308452
WBGene00044227	C07A9.13	17.1367	1.58361	0.676922	2.33943	0.0193131	0.308452
WBGene00012854	Y44A6D.3	465.339	-0.547324	0.234108	-2.33791	0.0193919	0.308929
WBGene00017444	F13H8.12	18.0306	2.23744	0.957232	2.33741	0.0194178	0.308929	Major sperm protein [Source:UniProtKB/TrEMBL;Acc:G4S429]
WBGene00044236	C17E4.11	681.983	0.407479	0.174327	2.33744	0.0194162	0.308929
WBGene00044987	K07A1.17	1787.96	0.587563	0.251546	2.33581	0.019501	0.309988
WBGene00008377	D1054.10	28238.8	0.856685	0.366913	2.33485	0.0195513	0.310485
WBGene00014022	ZK637.2	2660.07	0.981186	0.420416	2.33384	0.0196039	0.310485
WBGene00015779	lrch-1	562.481	-0.666617	0.285642	-2.33375	0.019609	0.310485	Leucine-rich Repeats (LRR) and Calponin Homology (CH) domain homolog [Source:UniProtKB/TrEMBL;Acc:Q17989]
WBGene00015823	C16B8.3	3327.58	1.11924	0.479613	2.33362	0.0196155	0.310485
WBGene00018335	F42A9.6	1354.9	0.900092	0.385553	2.33455	0.0195672	0.310485
WBGene00195010	Y37E11AL.12	8.2991	3.1746	1.36074	2.33299	0.0196484	0.310742
WBGene00003091	lys-2	25131	1.05508	0.452746	2.3304	0.0197851	0.312135	Lysozyme-like protein 2 [Source:UniProtKB/Swiss-Prot;Acc:O62416]
WBGene00004338	rfc-2	3666.24	0.704743	0.302378	2.33067	0.0197709	0.312135	RFC (DNA replication factor) family [Source:UniProtKB/TrEMBL;Acc:O44175]
WBGene00017429	F13D11.4	479.646	-0.805261	0.345598	-2.33005	0.0198035	0.312135
WBGene00021563	Y45G12B.2	2947.95	0.8927	0.383123	2.33006	0.0198029	0.312135	Zinc finger protein-like 1 homolog [Source:UniProtKB/Swiss-Prot;Acc:Q9N4Y9]
WBGene00001875	his-1	9.38203	1.55699	0.668555	2.32889	0.0198651	0.312841	Histone H4 [Source:UniProtKB/Swiss-Prot;Acc:P62784]
WBGene00001432	fkb-7	464.608	-0.946281	0.407161	-2.32409	0.0201204	0.314739	Peptidylprolyl isomerase [Source:UniProtKB/TrEMBL;Acc:O61826]
WBGene00003417	mrt-2	795.25	0.566761	0.243871	2.32402	0.0201244	0.314739	MoRTal germline; Rad1-like protein [Source:UniProtKB/TrEMBL;Acc:G5EC44]
WBGene00004483	rps-14	82658.9	1.33273	0.573044	2.3257	0.0200344	0.314739	40S ribosomal protein S14 [Source:UniProtKB/Swiss-Prot;Acc:P48150]
WBGene00008504	F01G4.5	786.466	0.394732	0.169847	2.32405	0.0201229	0.314739
WBGene00011687	cwc-15	6910.21	0.751544	0.323151	2.32568	0.0200359	0.314739	Protein CWC15 homolog [Source:UniProtKB/Swiss-Prot;Acc:O45766]
WBGene00018725	kreg-1	181.433	1.59899	0.687646	2.3253	0.0200557	0.314739
WBGene00019662	K11H12.6	88.6568	0.694674	0.298896	2.32414	0.0201182	0.314739
WBGene00019688	K12H6.8	3.24927	3.60564	1.55163	2.32378	0.0201375	0.314739
WBGene00255549	Y71F9B.24	3.08435	2.35389	1.0124	2.32507	0.0200684	0.314739
WBGene00004486	rps-17	35356.9	1.11486	0.479835	2.32343	0.0201562	0.314768	40S ribosomal protein S17 [Source:UniProtKB/Swiss-Prot;Acc:O01692]
WBGene00003877	pept-1	1405.88	-1.0416	0.448457	-2.32262	0.0201997	0.315183	Peptide transporter family 1 [Source:UniProtKB/Swiss-Prot;Acc:Q21219]
WBGene00016911	drn-1	177.137	-0.784512	0.337986	-2.32114	0.0202795	0.316163	GTP-binding protein drn-1 [Source:UniProtKB/Swiss-Prot;Acc:Q09930]
WBGene00000416	ced-2	3149.28	0.607264	0.26193	2.31842	0.0204265	0.316268	Cell death abnormality protein 2 [Source:UniProtKB/Swiss-Prot;Acc:Q9NHC3]
WBGene00000975	dhs-12	2894.34	0.798931	0.345033	2.31552	0.0205846	0.316268	DeHydrogenases, Short chain [Source:UniProtKB/TrEMBL;Acc:G5EG13]
WBGene00006802	unc-69	1373.05	0.547559	0.236046	2.31971	0.0203564	0.316268	Short coiled-coil domain-containing protein UNC-69 splice variant T07A5.6b [Source:UniProtKB/TrEMBL;Acc:G5EDQ5]
WBGene00006811	unc-79	122.984	-0.747792	0.323048	-2.3148	0.0206238	0.316268	Uncoordinated protein 79 [Source:UniProtKB/Swiss-Prot;Acc:P42173]
WBGene00009730	myo-6	272.775	-0.871957	0.376237	-2.31757	0.0204725	0.316268	MYOsin heavy chain structural genes [Source:UniProtKB/TrEMBL;Acc:Q5FC20]
WBGene00011156	R09B3.3	38453.6	1.31031	0.565485	2.31715	0.0204957	0.316268
WBGene00012074	T27A8.2	213.045	0.801116	0.34577	2.3169	0.020509	0.316268
WBGene00012104	sygl-1	2815.97	0.684874	0.295853	2.31491	0.0206177	0.316268
WBGene00012123	T28D6.3	477.42	1.82585	0.788641	2.31518	0.0206028	0.316268
WBGene00012370	W09G3.7	264.121	0.906714	0.391708	2.31477	0.0206255	0.316268
WBGene00013209	bub-3	5725.91	0.627794	0.270972	2.31683	0.0205132	0.316268	Mitotic checkpoint protein bub-3 [Source:UniProtKB/Swiss-Prot;Acc:Q9XWH0]
WBGene00013735	Y111B2A.12	1951.67	0.545678	0.235673	2.3154	0.020591	0.316268
WBGene00013740	hut-1	2348.21	0.438997	0.189413	2.31767	0.0204672	0.316268	Yeast Homolog UDP-Gal Transporter [Source:UniProtKB/TrEMBL;Acc:V6CLL6]
WBGene00013874	ZC376.2	687.902	0.911983	0.393615	2.31694	0.0205068	0.316268
WBGene00017172	F02C9.1	11.6518	3.11524	1.3455	2.3153	0.0205964	0.316268
WBGene00019381	K04C2.3	3433.69	0.621706	0.267985	2.31992	0.020345	0.316268
WBGene00021209	hgap-1	2507.9	0.6576	0.283392	2.32046	0.020316	0.316268	Heterodimeric GTPase Activating Protein subunit [Source:UniProtKB/TrEMBL;Acc:V6CIT8]
WBGene00022427	Y104H12D.3	2163.34	0.804113	0.346985	2.31743	0.0204805	0.316268
WBGene00045053	K12C11.7	219.722	1.06962	0.461201	2.3192	0.020384	0.316268
WBGene00206380	C42D4.18	192.789	-0.886336	0.382658	-2.31626	0.0205438	0.316268
WBGene00017894	F28B12.1	97.592	-0.79495	0.343485	-2.31436	0.0206479	0.316352
WBGene00011320	T01C3.3	3854.34	0.796514	0.344313	2.31335	0.0207036	0.316945
WBGene00006817	unc-85	4828.37	0.635664	0.274917	2.3122	0.0207666	0.317649	Probable histone chaperone asf-1 [Source:UniProtKB/Swiss-Prot;Acc:Q19326]
WBGene00001650	gon-1	409.839	-0.941363	0.407264	-2.31143	0.0208089	0.317938	A disintegrin and metalloproteinase with thrombospondin motifs gon-1 [Source:UniProtKB/Swiss-Prot;Acc:Q19791]
WBGene00018000	F33D11.1	10.9385	3.0177	1.30573	2.31112	0.0208261	0.317938
WBGene00018374	tag-343	426.3	-0.684688	0.296282	-2.31093	0.0208366	0.317938
WBGene00013020	Y48G10A.3	1448.14	0.753742	0.326295	2.31	0.0208882	0.318464
WBGene00021826	txl-1	4534.51	0.553104	0.239478	2.30962	0.020909	0.318521	ThioredoXin-Like; Thioredoxin-like protein; Thioredoxin-like protein TXL [Source:UniProtKB/TrEMBL;Acc:G5EES9]
WBGene00010195	pot-2	1043.62	0.743777	0.32209	2.30922	0.0209316	0.318604	Protection Of Telomeres 1 (Pot1) homolog [Source:UniProtKB/TrEMBL;Acc:O45595]
WBGene00011530	T06D8.10	411.061	-1.27448	0.552048	-2.30865	0.0209632	0.318788
WBGene00016738	C47D2.1	107.541	0.691888	0.299729	2.30838	0.0209778	0.318788
WBGene00007899	C33D9.5	151.007	-1.04965	0.454872	-2.30757	0.0210232	0.319217
WBGene00010448	K01A6.6	57.8489	0.664288	0.28795	2.30695	0.0210575	0.319478
WBGene00016509	adss-1	11148	0.66173	0.286899	2.30649	0.0210833	0.319609	Adenylosuccinate synthetase [Source:UniProtKB/Swiss-Prot;Acc:P91134]
WBGene00010348	H01G02.1	1242.77	0.73536	0.318887	2.30602	0.0211096	0.319749
WBGene00001518	gar-2	194.678	-0.825563	0.358166	-2.30497	0.0211681	0.320265	Probable muscarinic acetylcholine receptor gar-2 [Source:UniProtKB/Swiss-Prot;Acc:Q09388]
WBGene00009572	F40D4.13	91.3863	0.986995	0.428281	2.30455	0.0211918	0.320265
WBGene00021838	Y54E10BL.3	19.6901	-1.43497	0.622684	-2.30449	0.0211953	0.320265
WBGene00004119	pqn-31	239.139	-1.11443	0.483857	-2.30323	0.0212661	0.321075	Prion-like-(Q/N-rich)-domain-bearing protein [Source:UniProtKB/TrEMBL;Acc:Q7JNW7]
WBGene00007324	C05B5.8	1138.14	0.838415	0.364094	2.30274	0.0212934	0.321227
WBGene00012253	clec-50	20491.6	1.1644	0.505837	2.30193	0.021339	0.321656	C-type LECtin [Source:UniProtKB/TrEMBL;Acc:Q9XUL7]
WBGene00012148	inos-1	5489.95	0.891177	0.387401	2.3004	0.0214258	0.322442	INOsitol-3-phosphate Synthase [Source:UniProtKB/TrEMBL;Acc:G5ED01]
WBGene00045052	K12C11.6	426.362	1.4116	0.61358	2.3006	0.0214142	0.322442
WBGene00195226	ZC404.16	4.89896	1.85831	0.808	2.29989	0.0214543	0.32261
WBGene00000220	atf-2	289.972	-0.659408	0.286774	-2.2994	0.0214824	0.322773	ATF (cAMP-dependent transcription factor) family [Source:UniProtKB/TrEMBL;Acc:Q21361]
WBGene00009981	F53F1.3	1066.08	0.400377	0.174157	2.29895	0.021508	0.322897
WBGene00009556	F39B2.5	729.947	0.71371	0.310534	2.29833	0.0215429	0.322902
WBGene00044773	C08A9.10	2748.04	0.979324	0.42607	2.2985	0.0215331	0.322902
WBGene00004150	pqn-67	45.0621	-0.792293	0.344835	-2.2976	0.0215845	0.323085	Prion-like-(Q/N-rich)-domain-bearing protein [Source:UniProtKB/TrEMBL;Acc:Q9XUQ0]
WBGene00010133	F55H12.2	561.763	1.08319	0.471462	2.29751	0.0215898	0.323085
WBGene00195250	C13C4.8	14.2613	1.10124	0.479384	2.2972	0.0216074	0.323089
WBGene00000659	col-84	409.529	2.92429	1.27375	2.29582	0.0216864	0.323092	COLlagen [Source:UniProtKB/TrEMBL;Acc:Q21437]
WBGene00001490	frm-3	174.501	-0.717595	0.312503	-2.29628	0.02166	0.323092	FERM domain (Protein4.1-ezrin-radixin-moesin) family [Source:UniProtKB/TrEMBL;Acc:O17905]
WBGene00010242	F58D5.2	180.11	1.2853	0.559877	2.29568	0.0216943	0.323092
WBGene00023172	Y23H5A.8	38.2004	1.36677	0.595254	2.29611	0.0216699	0.323092
WBGene00219266	mir-4938	18.5723	-1.26157	0.549391	-2.2963	0.0216588	0.323092
WBGene00000594	col-3	1074.79	2.54215	1.10796	2.29444	0.0217654	0.323132	COLlagen; COLlagen structural [Source:UniProtKB/TrEMBL;Acc:G5EDG6]
WBGene00002210	kin-29	815.17	-0.559663	0.243884	-2.29479	0.0217451	0.323132	Serine/threonine-protein kinase kin-29 [Source:UniProtKB/Swiss-Prot;Acc:Q21017]
WBGene00014956	Y102A5C.11	5.50249	1.6891	0.736178	2.29442	0.0217663	0.323132
WBGene00017257	F08F1.3	217.719	-0.420669	0.183335	-2.29454	0.0217595	0.323132
WBGene00013872	ZC374.2	152.542	-0.596103	0.259869	-2.29386	0.0217986	0.323355
WBGene00001762	gst-14	18.5134	-1.1391	0.496798	-2.29289	0.0218541	0.323792	Glutathione S-Transferase [Source:UniProtKB/TrEMBL;Acc:Q93696]
WBGene00003515	myo-3	2686.61	-0.799388	0.348706	-2.29244	0.0218802	0.323792	Myosin-3 [Source:UniProtKB/Swiss-Prot;Acc:P12844]
WBGene00010747	K10D11.3	147.946	-0.593806	0.258999	-2.29269	0.0218656	0.323792
WBGene00004421	rpl-10	135828	1.21187	0.529114	2.29039	0.021999	0.32452	60S ribosomal protein L10 [Source:UniProtKB/Swiss-Prot;Acc:Q09533]
WBGene00011215	R10E9.3	125.908	0.968551	0.422864	2.29046	0.0219948	0.32452
WBGene00021421	Y38F2AR.3	1624.18	0.585508	0.25555	2.29117	0.0219534	0.32452
WBGene00077546	C01A2.9	11.9943	1.45928	0.637047	2.2907	0.0219809	0.32452
WBGene00007266	C03A3.1	129.994	-0.608324	0.265719	-2.28935	0.0220588	0.324889
WBGene00044746	C53H9.3	831.581	1.32695	0.579617	2.28936	0.0220586	0.324889
WBGene00007421	C07H4.1	319.152	0.780195	0.340981	2.28809	0.0221324	0.324955
WBGene00010269	F58G1.7	173.155	0.816712	0.356951	2.28802	0.0221363	0.324955
WBGene00011676	cyp-13A2	320.563	-0.965448	0.422002	-2.28778	0.0221505	0.324955	Putative cytochrome P450 CYP13A2 [Source:UniProtKB/Swiss-Prot;Acc:Q27518]
WBGene00077526	C25A1.16	5270.95	1.03998	0.454476	2.28831	0.0221193	0.324955
WBGene00077787	T05E12.10	18.3153	1.18524	0.517828	2.28887	0.022087	0.324955
WBGene00019509	K07H8.9	883.322	0.733912	0.320896	2.28707	0.0221915	0.325174
WBGene00185055	Y47D3B.12	55.3614	1.08861	0.476016	2.28692	0.0222003	0.325174
WBGene00021456	Y39F10B.1	3049.02	0.62327	0.272611	2.2863	0.022237	0.325456
WBGene00016393	C34B2.8	7769.1	1.09856	0.480591	2.28585	0.0222631	0.325582
WBGene00010308	F59B2.3	2255.51	0.441601	0.193222	2.28546	0.0222858	0.325659	N-acetylglucosamine-6-phosphate deacetylase [Source:UniProtKB/Swiss-Prot;Acc:P34480]
WBGene00003434	msp-38	71.8922	3.98228	1.744	2.28342	0.0224057	0.327155	Major sperm protein 38 [Source:UniProtKB/Swiss-Prot;Acc:P53020]
WBGene00000369	ccf-1	5461	0.585325	0.256604	2.28105	0.0225457	0.327592	CCR4-NOT transcription complex subunit 7 [Source:UniProtKB/Swiss-Prot;Acc:Q17345]
WBGene00002107	ins-24	147.053	1.23782	0.542334	2.2824	0.022466	0.327592	INSulin related [Source:UniProtKB/TrEMBL;Acc:Q9U1P6]
WBGene00010770	K11D2.4	1052.18	0.779879	0.341717	2.28224	0.0224754	0.327592
WBGene00011058	fdps-1	2260.63	0.384732	0.168681	2.28083	0.0225586	0.327592	Farnesyl DiPhosphate Synthetase [Source:UniProtKB/TrEMBL;Acc:O62336]
WBGene00011829	T19A6.4	177.702	0.857784	0.376037	2.28111	0.0225417	0.327592
WBGene00021827	dnc-6	1980.54	0.709024	0.310718	2.28189	0.0224959	0.327592	Dynactin subunit 6 [Source:UniProtKB/Swiss-Prot;Acc:Q9N3F1]
WBGene00021993	Y59E9AL.3	20.4354	2.90855	1.27477	2.28162	0.0225117	0.327592
WBGene00001690	grd-1	189.201	-1.16185	0.509791	-2.27907	0.0226626	0.327794	GRounDhog (Hedgehog-like family) [Source:UniProtKB/TrEMBL;Acc:Q21835]
WBGene00001805	gur-4	115.674	1.42256	0.62453	2.27781	0.0227377	0.327794	GUstatory Receptor family [Source:UniProtKB/TrEMBL;Acc:Q9XU57]
WBGene00003076	lsm-1	2450.32	0.679255	0.298159	2.27816	0.0227169	0.327794	LSM Sm-like protein [Source:UniProtKB/TrEMBL;Acc:Q20229]
WBGene00004449	rpl-35	60868.7	0.919807	0.40386	2.27754	0.022754	0.327794	60S ribosomal protein L35 [Source:UniProtKB/Swiss-Prot;Acc:P34662]
WBGene00006310	sul-3	114.899	-1.02744	0.450943	-2.27842	0.0227018	0.327794	SULfatase domain protein [Source:UniProtKB/TrEMBL;Acc:H2KZF6]
WBGene00008355	fbxa-141	75.1997	-0.690395	0.303126	-2.27758	0.0227514	0.327794	F-box A protein [Source:UniProtKB/TrEMBL;Acc:O62123]
WBGene00009393	clec-62	4931.28	0.533657	0.234364	2.27705	0.0227835	0.327794	C-type LECtin [Source:UniProtKB/TrEMBL;Acc:O45441]
WBGene00009632	ttyh-1	1547.04	-0.562271	0.246805	-2.2782	0.0227144	0.327794	Protein tweety homolog 1 [Source:UniProtKB/Swiss-Prot;Acc:Q20332]
WBGene00013728	Y111B2A.2	2309.04	0.715399	0.313863	2.27934	0.0226471	0.327794
WBGene00016017	C23G10.11	115.467	2.08593	0.915747	2.27784	0.0227359	0.327794
WBGene00018085	ttr-20	558.856	0.631079	0.276812	2.27981	0.0226187	0.327794	TransThyretin-Related family domain [Source:UniProtKB/TrEMBL;Acc:Q20089]
WBGene00019240	H24K24.3	4804.41	0.936461	0.411228	2.27723	0.0227723	0.327794	Alcohol dehydrogenase class-3 [Source:UniProtKB/Swiss-Prot;Acc:Q17335]
WBGene00001116	dyc-1	180.744	-0.804848	0.353951	-2.27389	0.0229723	0.328464	Dystrophin-like protein 1 [Source:UniProtKB/Swiss-Prot;Acc:Q8STF6]
WBGene00001210	egl-46	78.5862	-0.743504	0.326993	-2.27376	0.0229805	0.328464	C2H2 zinc finger protein EGL-46 [Source:UniProtKB/TrEMBL;Acc:G5EFY4]
WBGene00004480	rps-11	77779.7	0.980068	0.431036	2.27375	0.0229809	0.328464	Ribosomal Protein, Small subunit [Source:UniProtKB/TrEMBL;Acc:Q20206]
WBGene00008493	F01D5.2	416.407	1.24648	0.548109	2.27415	0.022957	0.328464
WBGene00010134	F55H12.3	304.443	-0.720443	0.316818	-2.27399	0.0229663	0.328464
WBGene00010370	ctg-1	1536.71	-0.496326	0.218139	-2.27528	0.0228893	0.328464	CRAL/TRIO and GOLD domain containing [Source:UniProtKB/TrEMBL;Acc:K8F7T8]
WBGene00015052	clec-52	2807.24	0.667832	0.293591	2.2747	0.022924	0.328464	C-type LECtin [Source:UniProtKB/TrEMBL;Acc:Q17452]
WBGene00018774	F53G12.9	66.6908	1.02089	0.449016	2.27362	0.0229886	0.328464
WBGene00194742	F37C12.21	58.5907	1.06499	0.468121	2.27504	0.0229034	0.328464
WBGene00012978	Y48B6A.1	6908.3	0.572275	0.251784	2.27288	0.0230337	0.328604	Ribosome biogenesis protein BOP1 homolog [Source:UniProtKB/Swiss-Prot;Acc:Q9U2A9]
WBGene00017866	stn-2	241.381	-0.52535	0.231138	-2.27288	0.0230335	0.328604	SynTrophiN [Source:UniProtKB/TrEMBL;Acc:Q5WRR6]
WBGene00002058	ifd-2	431.152	-0.792386	0.348722	-2.27226	0.0230708	0.328882	Intermediate filament protein ifd-2 [Source:UniProtKB/Swiss-Prot;Acc:Q19782]
WBGene00004787	sft-1	592.391	0.804832	0.354314	2.27152	0.0231152	0.328884	SURF1-like protein [Source:UniProtKB/Swiss-Prot;Acc:Q9N5N8]
WBGene00007107	pfd-4	3360.94	0.581456	0.256055	2.27083	0.0231574	0.328884	Probable prefoldin subunit 4 [Source:UniProtKB/Swiss-Prot;Acc:Q17435]
WBGene00195065	F20G2.9	3.93894	2.22108	0.977972	2.27111	0.0231403	0.328884
WBGene00195248	emc-5	391.16	-0.488975	0.215224	-2.27194	0.0230904	0.328884	EMC Endoplasmic Membrane protein Complex (Yeast EMC) homolog [Source:UniProtKB/TrEMBL;Acc:E1B6R8]
WBGene00219949	F44E5.16	4.37081	-2.48297	1.09343	-2.2708	0.0231591	0.328884	NA
WBGene00018656	F49H12.5	2082.3	-0.904644	0.398475	-2.27027	0.0231914	0.329093
WBGene00009907	F49H6.3	4.35409	2.67792	1.17978	2.26986	0.0232162	0.329193
WBGene00001006	dlg-1	3239.72	-0.667147	0.294395	-2.26617	0.0234411	0.330373	Drosophila Discs LarGe homolog; MAGUK protein DLG-1; SAP97-like protein DLG-1 [Source:UniProtKB/TrEMBL;Acc:G5ECY0]
WBGene00003385	moc-2	286.047	0.992666	0.438032	2.26619	0.0234395	0.330373	MOlybdenum Cofactor biosynthesis [Source:UniProtKB/TrEMBL;Acc:Q23069]
WBGene00004444	rpl-30	28106.9	1.06365	0.469359	2.26617	0.0234409	0.330373	Ribosomal Protein, Large subunit [Source:UniProtKB/TrEMBL;Acc:Q9XWS4]
WBGene00013476	Y69E1A.4	4.26836	3.7002	1.63277	2.26621	0.0234383	0.330373	Serine/threonine-protein phosphatase [Source:UniProtKB/TrEMBL;Acc:Q9XW33]
WBGene00016328	pde-5	20.0515	-1.09326	0.482266	-2.26692	0.0233951	0.330373	Probable 3',5'-cyclic phosphodiesterase pde-5 [Source:UniProtKB/Swiss-Prot;Acc:P91119]
WBGene00018049	clec-138	4.50498	-2.66066	1.17318	-2.26791	0.0233349	0.330373	C-type LECtin [Source:UniProtKB/TrEMBL;Acc:Q20038]
WBGene00018054	F35F10.4	15.5561	-1.14427	0.504667	-2.26738	0.0233672	0.330373
WBGene00045261	H29C22.1	2084.89	1.09057	0.48098	2.26739	0.0233664	0.330373
WBGene00012939	Y47D3B.1	190.244	-0.942263	0.41591	-2.26555	0.0234791	0.330408
WBGene00020115	mboa-6	5455.64	0.578312	0.255247	2.26569	0.0234702	0.330408	Lysophospholipid acyltransferase 5 [Source:UniProtKB/Swiss-Prot;Acc:O01925]
WBGene00021691	Y48G8AL.13	3507.77	0.86128	0.380306	2.2647	0.0235311	0.33089
WBGene00013433	Y66D12A.7	506.083	0.853317	0.377124	2.26269	0.0236545	0.332375	Glutamyl-tRNA(Gln) amidotransferase subunit C, mitochondrial [Source:UniProtKB/Swiss-Prot;Acc:Q9BI40]
WBGene00021912	Y55B1BR.2	765.717	0.527758	0.233274	2.26239	0.0236731	0.332386
WBGene00016106	C25F6.7	503.094	-1.2299	0.543778	-2.26178	0.0237111	0.332669
WBGene00000622	col-45	338.92	2.69678	1.1936	2.25937	0.0238604	0.333515	COLlagen [Source:UniProtKB/TrEMBL;Acc:V6CM19]
WBGene00009294	F31D4.9	3005.76	1.2399	0.548851	2.25907	0.0238787	0.333515
WBGene00009389	F35B12.10	342.62	-0.473054	0.209321	-2.25994	0.0238247	0.333515
WBGene00017402	F12E12.1	541.183	0.76662	0.339312	2.25934	0.0238624	0.333515
WBGene00022250	Y73B6BL.29	401.821	0.407698	0.180417	2.25976	0.0238362	0.333515	tRNA pseudouridine synthase [Source:UniProtKB/TrEMBL;Acc:Q95XD5]
WBGene00044900	cnc-11	12.2714	1.65744	0.733618	2.25927	0.0238669	0.333515	CaeNaCin (Caenorhabditis bacteriocin) [Source:UniProtKB/TrEMBL;Acc:A4V4W3]
WBGene00004815	skr-9	755.445	0.823376	0.36456	2.25855	0.0239116	0.333667	SKR-9; SKp1 Related (Ubiquitin ligase complex component) [Source:UniProtKB/TrEMBL;Acc:G5EFA9]
WBGene00016655	acbp-1	4274.24	1.48209	0.656277	2.25833	0.0239254	0.333667	Acyl-CoA-binding protein homolog 1 [Source:UniProtKB/Swiss-Prot;Acc:O01805]
WBGene00001145	eat-16	614.241	-0.507103	0.224712	-2.25668	0.0240279	0.334029
WBGene00001428	fkb-3	1539.34	-1.04927	0.465568	-2.25374	0.0242123	0.334029	Peptidylprolyl isomerase [Source:UniProtKB/TrEMBL;Acc:O16309]
WBGene00001892	his-18	7.13594	2.08717	0.924663	2.25722	0.0239942	0.334029	Histone H4 [Source:UniProtKB/Swiss-Prot;Acc:P62784]
WBGene00003442	msp-49	151.094	3.70828	1.64472	2.25465	0.0241553	0.334029	Major sperm protein 49 [Source:UniProtKB/Swiss-Prot;Acc:Q18461]
WBGene00004476	rps-7	85499.3	0.881713	0.391195	2.2539	0.0242027	0.334029	40S ribosomal protein S7 [Source:UniProtKB/Swiss-Prot;Acc:Q23312]
WBGene00007750	syg-2	376.942	-0.468082	0.207459	-2.25627	0.024054	0.334029	Synaptogenesis protein syg-2 [Source:RefSeq peptide;Acc:NP_001309467]
WBGene00011668	clec-47	728.464	1.19662	0.530458	2.25583	0.0240816	0.334029	C-type LECtin [Source:UniProtKB/TrEMBL;Acc:O18076]
WBGene00011852	clec-26	54.4908	-0.985394	0.436817	-2.25585	0.02408	0.334029	C-type LECtin [Source:UniProtKB/TrEMBL;Acc:Q9XUN6]
WBGene00012145	nlp-46	26.0497	-1.247	0.552859	-2.25554	0.0240992	0.334029	Neuropeptide-Like Protein [Source:UniProtKB/TrEMBL;Acc:Q7YTJ1]
WBGene00012188	W01G7.4	3024.12	1.05692	0.468502	2.25595	0.0240738	0.334029
WBGene00013984	ZK512.4	1083.65	1.06151	0.470989	2.25379	0.0242094	0.334029	Signal recognition particle 9 kDa protein [Source:UniProtKB/Swiss-Prot;Acc:P34642]
WBGene00015911	C17F4.3	110.683	3.04891	1.35312	2.25325	0.0242435	0.334029
WBGene00016332	C32F10.4	1081.37	0.54579	0.242213	2.25335	0.0242372	0.334029
WBGene00016447	msd-4	353.634	3.89982	1.73113	2.25277	0.0242738	0.334029	Major Sperm protein Domain containing [Source:UniProtKB/TrEMBL;Acc:G5EEJ7]
WBGene00017334	F10D2.8	44.1336	1.54071	0.683664	2.25361	0.0242209	0.334029
WBGene00018659	F52C6.2	1045.02	0.698263	0.309352	2.25718	0.0239968	0.334029
WBGene00019730	asns-2	8148.73	-0.924085	0.41018	-2.25288	0.024267	0.334029	Asparagine synthetase [Source:UniProtKB/TrEMBL;Acc:Q65ZI9]
WBGene00022307	Y77E11A.2	1809.49	0.787813	0.349328	2.25522	0.0241194	0.334029
WBGene00013445	Y66D12A.19	622.704	0.777786	0.34533	2.2523	0.0243035	0.334192
WBGene00011528	T06D8.7	2707.99	0.895896	0.397915	2.25148	0.0243553	0.334526
WBGene00022126	Y71F9B.2	1472.27	0.633503	0.281389	2.25134	0.0243638	0.334526	Phosphatidate cytidylyltransferase, mitochondrial [Source:UniProtKB/Swiss-Prot;Acc:Q9N4G7]
WBGene00015670	C10B5.1	352.917	0.566721	0.251769	2.25096	0.0243881	0.334614
WBGene00006728	ubq-2	63984.1	1.0135	0.450411	2.25017	0.0244383	0.335057	Ubiquitin-60S ribosomal protein L40 Ubiquitin 60S ribosomal protein L40 [Source:UniProtKB/Swiss-Prot;Acc:P49632]
WBGene00006472	tag-123	3808.11	0.445726	0.198163	2.24929	0.0244939	0.335438	Transmembrane 9 superfamily member [Source:UniProtKB/TrEMBL;Acc:O17388]
WBGene00006958	wve-1	1924.82	0.556814	0.247565	2.24916	0.0245021	0.335438	WAVE (Actin cytoskeleton modulator) homolog [Source:UniProtKB/TrEMBL;Acc:F5GUF0]
WBGene00004914	snr-1	13308	0.987768	0.439286	2.24858	0.0245395	0.335703	Small nuclear ribonucleoprotein Sm D3 [Source:UniProtKB/Swiss-Prot;Acc:Q17348]
WBGene00219826	C18H9.12	228.143	0.602991	0.268329	2.24721	0.0246269	0.336652	NA
WBGene00004153	pqn-71	52.389	-1.49817	0.666986	-2.24619	0.0246921	0.337078	Prion-like-(Q/N-rich)-domain-bearing protein [Source:UniProtKB/TrEMBL;Acc:O18118]
WBGene00011274	R53.5	2678.95	0.883498	0.393476	2.24537	0.0247443	0.337078
WBGene00012933	mib-1	497.837	0.841977	0.374949	2.24558	0.0247309	0.337078	MIB (MIndBomb) ubiquitin ligase homolog [Source:UniProtKB/TrEMBL;Acc:Q9U2C5]
WBGene00019321	K02E10.7	86.563	-0.701575	0.312418	-2.24563	0.0247279	0.337078
WBGene00021611	nhr-238	68.8584	-0.656734	0.292492	-2.24531	0.0247484	0.337078	Nuclear Hormone Receptor family [Source:UniProtKB/TrEMBL;Acc:Q966B7]
WBGene00009635	F42F12.3	933.689	0.882026	0.393036	2.24413	0.0248237	0.337335
WBGene00015338	catp-2	17.2215	-1.09535	0.488034	-2.24442	0.0248055	0.337335	Cation transporting ATPase [Source:UniProtKB/TrEMBL;Acc:A0A131MBN3]
WBGene00017971	F32A5.8	754.516	-0.501462	0.223476	-2.24392	0.0248379	0.337335
WBGene00019029	F58B6.1	82.2366	1.17772	0.524857	2.24389	0.0248397	0.337335
WBGene00044001	C09G4.4	634.896	0.567152	0.252797	2.24351	0.0248642	0.337422	C09G4.4 protein [Source:UniProtKB/TrEMBL;Acc:G5ED81]
WBGene00012201	W02B12.1	538.96	0.537642	0.239693	2.24305	0.0248938	0.337578
WBGene00219316	F21A3.11	1917.11	0.750171	0.334663	2.24157	0.0249893	0.338627	Purple acid phosphatase [Source:UniProtKB/TrEMBL;Acc:H2FLJ4]
WBGene00019235	H23N18.4	3.90614	-3.017	1.34653	-2.24057	0.0250537	0.339007
WBGene00020479	T13C2.3	257.459	-0.649316	0.289794	-2.24062	0.025051	0.339007
WBGene00003167	mec-3	116.28	0.613601	0.273961	2.23974	0.0251078	0.339185	Mechanosensory protein 3 [Source:UniProtKB/Swiss-Prot;Acc:P09088]
WBGene00010126	F55G11.6	7.84171	1.75208	0.782342	2.23953	0.0251215	0.339185
WBGene00010758	vnut-1	2252.97	0.676045	0.30184	2.23974	0.0251075	0.339185	Vesicular NUcleotide Transporte [Source:UniProtKB/TrEMBL;Acc:O45678]
WBGene00021528	gbb-1	222.216	-0.60587	0.270578	-2.23917	0.025145	0.339257	GABA B receptor subunit; GABAB1 receptor subunit [Source:UniProtKB/TrEMBL;Acc:B3VBI8]
WBGene00013211	Y54G9A.9	317.965	1.3617	0.60822	2.23883	0.025167	0.339309
WBGene00013093	cup-14	2598.42	0.706801	0.315783	2.23825	0.0252046	0.339425
WBGene00021515	set-23	713.015	0.716694	0.320259	2.23786	0.0252303	0.339425	Probable histone-lysine N-methyltransferase set-23 [Source:UniProtKB/Swiss-Prot;Acc:Q95Y12]
WBGene00043997	Y79H2A.12	20.3409	1.14437	0.511356	2.2379	0.0252274	0.339425
WBGene00011205	R10E4.9	923.32	1.05995	0.473928	2.23652	0.0253174	0.339862	Very-long-chain (3R)-3-hydroxyacyl-CoA dehydratase [Source:UniProtKB/TrEMBL;Acc:Q21905]
WBGene00021340	Y34F4.5	759.397	1.01297	0.452846	2.2369	0.0252929	0.339862
WBGene00219756	linc-68	9.53862	1.80154	0.805466	2.23664	0.0253099	0.339862	NA
WBGene00006680	twk-28	294.616	-0.587321	0.262754	-2.23525	0.0254012	0.339948	TWiK family of potassium channels [Source:UniProtKB/TrEMBL;Acc:Q22940]
WBGene00008687	F11A10.6	1257.92	0.538018	0.240758	2.23468	0.0254384	0.339948
WBGene00010245	F58D5.6	11.1523	-1.79682	0.803963	-2.23496	0.0254202	0.339948
WBGene00011984	T24C2.5	338.937	0.685475	0.306655	2.23533	0.0253959	0.339948
WBGene00018241	F40G9.5	365.842	0.610498	0.273055	2.23581	0.0253645	0.339948
WBGene00021015	enu-3.3	226.554	0.910029	0.407084	2.23548	0.0253857	0.339948	ENhancer of Uncoordination [Source:UniProtKB/TrEMBL;Acc:O44748]
WBGene00175031	C06C3.12	11.5157	-1.59503	0.713826	-2.23448	0.0254514	0.339948
WBGene00013561	Y75B8A.31	1650.56	0.494517	0.221349	2.23411	0.025476	0.340033	UPF0528 protein Y75B8A.31 [Source:UniProtKB/Swiss-Prot;Acc:Q9XW78]
WBGene00009257	F29G6.1	104.475	-1.23805	0.554396	-2.23316	0.0255386	0.34045
WBGene00016374	swd-2.2	2163.15	0.583022	0.261085	2.23308	0.0255438	0.34045	Set1 WD40 repeat protein homolog [Source:UniProtKB/TrEMBL;Acc:Q18403]
WBGene00044199	F57B1.8	2.72254	2.63126	1.17851	2.23271	0.025568	0.340529
WBGene00077563	peel-1	25.2315	2.45385	1.0992	2.23239	0.0255893	0.34057	PEEL-1 [Source:UniProtKB/TrEMBL;Acc:G5EGC6]
WBGene00000697	col-123	112.757	3.26659	1.46941	2.22307	0.0262113	0.34082	COLlagen [Source:UniProtKB/TrEMBL;Acc:Q23222]
WBGene00000887	cyn-11	3049.02	0.7289	0.32758	2.2251	0.0260742	0.34082	Peptidyl-prolyl cis-trans isomerase 11 [Source:UniProtKB/Swiss-Prot;Acc:P52018]
WBGene00001156	ech-7	4107.49	1.14498	0.515011	2.22321	0.0262015	0.34082	Enoyl-CoA Hydratase [Source:UniProtKB/TrEMBL;Acc:Q9NEZ8]
WBGene00003374	mlk-1	454.101	-0.60778	0.272498	-2.2304	0.0257207	0.34082	Mitogen-activated protein kinase kinase kinase mlk-1 [Source:UniProtKB/Swiss-Prot;Acc:A0A0K3AV08]
WBGene00004075	pod-1	16104.1	0.716874	0.321247	2.23153	0.0256458	0.34082	POD-1 [Source:UniProtKB/TrEMBL;Acc:G5EDS2]
WBGene00004441	rpl-27	64978.6	1.02993	0.461937	2.22959	0.0257744	0.34082	60S ribosomal protein L27 [Source:UniProtKB/Swiss-Prot;Acc:P91914]
WBGene00005528	sri-16	47.6719	1.11696	0.501969	2.22515	0.0260709	0.34082	Serpentine Receptor, class I [Source:UniProtKB/TrEMBL;Acc:O62177]
WBGene00005547	sri-35	12.6315	1.47731	0.664298	2.22387	0.0261571	0.34082
WBGene00006467	magu-2	357.84	-0.732701	0.329071	-2.22657	0.0259758	0.34082	MAGUK family [Source:UniProtKB/TrEMBL;Acc:Q17549]
WBGene00006584	tni-1	1792.56	-0.838977	0.376217	-2.23003	0.0257453	0.34082	Troponin I 1 [Source:UniProtKB/Swiss-Prot;Acc:Q20334]
WBGene00006678	twk-25	157.238	-0.568076	0.255027	-2.22751	0.0259131	0.34082	TWiK family of potassium channels [Source:UniProtKB/TrEMBL;Acc:I2HAI4]
WBGene00006924	vig-1	67242.8	0.750653	0.337134	2.22657	0.0259757	0.34082	VIG (Drosophila Vasa Intronic Gene) ortholog [Source:UniProtKB/TrEMBL;Acc:H2KYR1]
WBGene00007068	cTel55X.1	1879.79	0.775365	0.348142	2.22715	0.0259372	0.34082
WBGene00007626	rnf-121	2348.22	0.462896	0.207772	2.2279	0.0258869	0.34082	RING finger protein 121 [Source:RefSeq peptide;Acc:NP_497832]
WBGene00009686	ent-7	531.334	0.568251	0.255019	2.22827	0.0258628	0.34082	Equilibrative Nucleoside Transporter [Source:UniProtKB/TrEMBL;Acc:E1B6S0]
WBGene00009771	F46B6.6	1656.45	-0.498508	0.223856	-2.22691	0.025953	0.34082
WBGene00010196	F57C2.4	2199.74	0.883189	0.397213	2.22347	0.0261844	0.34082
WBGene00010556	rack-1	99147.1	0.932175	0.418776	2.22595	0.0260175	0.34082	Guanine nucleotide-binding protein subunit beta-2-like 1 [Source:UniProtKB/Swiss-Prot;Acc:Q21215]
WBGene00013972	scl-20	83.2853	1.76194	0.790188	2.22977	0.0257627	0.34082	SCP-Like extracellular protein [Source:UniProtKB/TrEMBL;Acc:O62508]
WBGene00014104	ZK849.6	20.7603	3.052	1.3695	2.22855	0.0258436	0.34082
WBGene00014820	R09B3.6	172.132	-0.502639	0.226041	-2.22367	0.0261709	0.34082
WBGene00014916	fbxa-124	125.289	-0.784135	0.352028	-2.22748	0.0259155	0.34082
WBGene00016797	C50A2.3	407.461	0.919995	0.413509	2.22485	0.0260913	0.34082
WBGene00017181	F02E11.3	23.6535	1.19729	0.536625	2.23115	0.0256714	0.34082
WBGene00017763	crls-1	2471.52	0.528251	0.237441	2.22477	0.026097	0.34082	Probable cardiolipin synthase (CMP-forming) [Source:UniProtKB/Swiss-Prot;Acc:O01916]
WBGene00018367	F42H10.3	605.373	-0.509717	0.229094	-2.22492	0.0260866	0.34082	LIM and SH3 domain protein F42H10.3 [Source:UniProtKB/Swiss-Prot;Acc:P34416]
WBGene00019631	K10D2.5	1105.21	0.812783	0.364788	2.2281	0.025874	0.34082
WBGene00021261	Y22D7AR.7	21.968	-1.1841	0.532071	-2.22546	0.0260505	0.34082
WBGene00021647	Y47G6A.22	1836.11	0.909199	0.408744	2.22437	0.0261235	0.34082
WBGene00022170	Y71H2AM.5	11629.5	1.22729	0.551153	2.22676	0.025963	0.34082
WBGene00077497	K06A4.10	20.2475	1.1123	0.500291	2.2233	0.0261955	0.34082
WBGene00235102	Y54G2A.75	3811.99	0.894068	0.40081	2.23065	0.0257041	0.34082
WBGene00235359	F56D6.22	16.362	2.92955	1.31278	2.23156	0.0256441	0.34082
WBGene00004428	rpl-16	69443.2	0.799412	0.359669	2.22263	0.0262406	0.340963	60S ribosomal protein L13a [Source:UniProtKB/Swiss-Prot;Acc:Q27389]
WBGene00009901	F49E12.8	34.0803	-1.01077	0.454953	-2.2217	0.0263036	0.341464
WBGene00021368	best-20	316.843	1.03372	0.46532	2.22152	0.0263158	0.341464	Bestrophin homolog [Source:UniProtKB/TrEMBL;Acc:Q965X4]
WBGene00022179	Y71H2AM.14	34.0941	-1.31338	0.591364	-2.22093	0.0263557	0.341745
WBGene00004151	pqn-68	332.879	0.654593	0.294992	2.21902	0.0264853	0.341771	D-tyrosyl-tRNA(Tyr) deacylase [Source:UniProtKB/TrEMBL;Acc:Q9XUP4]
WBGene00004163	pqn-82	902.317	0.660601	0.297785	2.21839	0.0265285	0.341771	Prion-like-(Q/N-rich)-domain-bearing protein [Source:UniProtKB/TrEMBL;Acc:Q9N411]
WBGene00007327	C05C9.3	43.7906	-1.1223	0.505409	-2.22058	0.0263794	0.341771
WBGene00009813	haly-1	521.178	-0.483003	0.217545	-2.22024	0.0264022	0.341771	Histidine ammonia-lyase [Source:UniProtKB/Swiss-Prot;Acc:Q20502]
WBGene00010542	K03H1.7	713.058	-0.888196	0.400355	-2.21852	0.0265192	0.341771
WBGene00020931	cytb-5.2	3257.21	0.60307	0.271873	2.2182	0.0265411	0.341771	YTochrome B [Source:UniProtKB/TrEMBL;Acc:O01816]
WBGene00021322	Y34B4A.6	11124.8	1.20494	0.542887	2.2195	0.0264524	0.341771
WBGene00021829	mrpl-17	1568.72	0.827511	0.372754	2.21999	0.0264192	0.341771	Mitochondrial Ribosomal Protein, Large [Source:UniProtKB/TrEMBL;Acc:Q9N3F3]
WBGene00045212	Y110A7A.21	186.908	1.1061	0.498355	2.2195	0.0264526	0.341771
WBGene00045340	T10G3.8	26.2007	-1.02213	0.460727	-2.21851	0.0265198	0.341771
WBGene00010062	lipl-1	529.184	1.36172	0.614266	2.21682	0.0266354	0.34195	Lipase [Source:UniProtKB/TrEMBL;Acc:Q93789]
WBGene00015150	B0336.13	1658.21	0.869802	0.392441	2.21639	0.026665	0.34195	Transcription initiation factor IIA small chain homolog [Source:UniProtKB/Swiss-Prot;Acc:Q9BIB4]
WBGene00016993	CD4.8	394.581	0.437304	0.197248	2.21702	0.0266215	0.34195
WBGene00022734	ZK418.5	3705.05	0.611509	0.275824	2.21703	0.0266211	0.34195
WBGene00044251	F59C6.12	194.673	0.43837	0.197777	2.21648	0.0266585	0.34195	UPF0598 protein F59C6.12 [Source:UniProtKB/Swiss-Prot;Acc:Q564X7]
WBGene00219369	R160.10	13.4488	1.55229	0.700339	2.21649	0.0266582	0.34195
WBGene00022075	Y69A2AR.3	2275.46	1.37119	0.618819	2.21582	0.0267035	0.342209
WBGene00013350	slr-2	765.742	0.441256	0.199165	2.21553	0.026724	0.342237	Synthetic with Lin-35/Rb [Source:RefSeq peptide;Acc:NP_001256774]
WBGene00002179	jph-1	749.163	-0.734993	0.33193	-2.21431	0.0268078	0.342369	JunctoPHilin [Source:UniProtKB/TrEMBL;Acc:Q22667]
WBGene00004020	pho-1	694.138	-1.22911	0.554925	-2.2149	0.0267667	0.342369	Intestinal acid phosphatase [Source:UniProtKB/Swiss-Prot;Acc:Q19076]
WBGene00019285	cbn-1	165.169	-1.00427	0.453606	-2.21398	0.0268304	0.342369	Calcium BiNding protein homolog [Source:UniProtKB/TrEMBL;Acc:Q9TZ47]
WBGene00019354	K03B4.2	5222.59	0.581579	0.262612	2.2146	0.0267877	0.342369
WBGene00021157	Y4C6B.3	90.8641	0.646293	0.291942	2.21377	0.0268445	0.342369
WBGene00022043	psf-3	1888.95	0.826255	0.373149	2.21427	0.0268099	0.342369	PSF (Yeast Partner of Sld Five) conserved replication factor, GINS complex [Source:UniProtKB/TrEMBL;Acc:Q9BL54]
WBGene00001309	emr-1	5454.1	0.767795	0.347163	2.21163	0.0269925	0.342382	Emerin homolog 1 [Source:UniProtKB/Swiss-Prot;Acc:O01971]
WBGene00003090	lys-1	30306.9	1.21475	0.549015	2.21261	0.0269247	0.342382	Lysozyme-like protein 1 [Source:UniProtKB/Swiss-Prot;Acc:O62415]
WBGene00003510	mxl-2	2002.62	0.785815	0.355231	2.21212	0.0269581	0.342382	MaX-Like [Source:UniProtKB/TrEMBL;Acc:Q9TZ70]
WBGene00004477	rps-8	110333	1.07682	0.486813	2.21198	0.0269679	0.342382	40S ribosomal protein S8 [Source:UniProtKB/Swiss-Prot;Acc:P48156]
WBGene00014672	C08F11.6	25.1516	0.935948	0.422996	2.21266	0.0269208	0.342382
WBGene00015572	C07G1.6	25.1576	2.60428	1.17741	2.21187	0.0269754	0.342382
WBGene00017385	F11G11.5	4114.63	0.478363	0.21625	2.21208	0.0269611	0.342382
WBGene00022309	rpc-11	676.688	1.14503	0.517381	2.21312	0.0268894	0.342382	DNA-directed RNA polymerase subunit [Source:UniProtKB/TrEMBL;Acc:Q9N4B7]
WBGene00008553	F07C6.2	169.075	0.867944	0.392562	2.21097	0.0270376	0.342721
WBGene00010163	F56H6.2	43.1425	0.906335	0.410132	2.20986	0.0271148	0.342809
WBGene00010655	K08D8.1	61.77	1.348	0.610077	2.20955	0.0271365	0.342809
WBGene00014002	ZK593.2	157.3	0.975389	0.44138	2.20986	0.0271149	0.342809
WBGene00019026	F58A6.9	55.3272	4.26842	1.93172	2.20965	0.0271294	0.342809	Major Sperm Protein [Source:UniProtKB/TrEMBL;Acc:G5EEW3]
WBGene00020684	T22D1.5	4831.53	0.78555	0.355357	2.21059	0.027064	0.342809
WBGene00006633	tsp-7	272.767	0.687477	0.311339	2.20813	0.0272353	0.342857	Tetraspanin [Source:UniProtKB/TrEMBL;Acc:Q9XVI4]
WBGene00007991	C37A5.7	609.673	0.704191	0.319054	2.20712	0.0273057	0.342857
WBGene00010484	dph-3	725.891	1.31316	0.594918	2.2073	0.0272933	0.342857	DPH3 homolog [Source:UniProtKB/Swiss-Prot;Acc:Q21102]
WBGene00012437	hum-9	260.749	-0.913943	0.414034	-2.20741	0.0272854	0.342857	Heavy chain, Unconventional Myosin [Source:UniProtKB/TrEMBL;Acc:Q9XWR0]
WBGene00013946	ZK228.3	901.647	0.683615	0.30973	2.20713	0.027305	0.342857
WBGene00017413	F13A2.4	168.647	1.17667	0.532897	2.20805	0.0272405	0.342857
WBGene00018934	F56B3.11	3108.49	1.05548	0.477855	2.20879	0.0271894	0.342857
WBGene00019489	K07E1.1	858.068	-0.670002	0.303558	-2.20717	0.0273025	0.342857	1,2-dihydroxy-3-keto-5-methylthiopentene dioxygenase homolog 2 [Source:UniProtKB/Swiss-Prot;Acc:Q09407]
WBGene00043981	T14E8.4	32.2599	-1.10092	0.498342	-2.20917	0.0271632	0.342857
WBGene00006769	unc-33	2534.68	0.719854	0.3262	2.20679	0.027329	0.342918
WBGene00018571	F47F2.3	10.2863	-1.41231	0.640216	-2.20599	0.0273848	0.343388
WBGene00219675	linc-44	10.1617	1.46033	0.662272	2.20503	0.0274518	0.343996	NA
WBGene00004420	rpl-9	65349.7	0.836652	0.379783	2.20297	0.0275967	0.344447	60S ribosomal protein L9 [Source:UniProtKB/Swiss-Prot;Acc:Q95Y90]
WBGene00008809	cyp-13A11	6.98915	2.19741	0.997551	2.20281	0.0276083	0.344447	CYtochrome P450 family [Source:UniProtKB/TrEMBL;Acc:O17806]
WBGene00012402	sfxn-1.3	15.5243	2.73457	1.24131	2.20297	0.0275965	0.344447	Sideroflexin [Source:UniProtKB/TrEMBL;Acc:Q7K7S6]
WBGene00020499	T14B4.2	1389.24	1.04478	0.474289	2.20283	0.0276069	0.344447
WBGene00020636	T20H4.5	5495.65	0.945804	0.429196	2.20367	0.0275479	0.344447	Probable NADH dehydrogenase [ubiquinone] iron-sulfur protein 8, mitochondrial [Source:UniProtKB/Swiss-Prot;Acc:Q22619]
WBGene00050885	Y94H6A.12	389.123	1.01927	0.462526	2.2037	0.0275455	0.344447
WBGene00235311	Y57E12B.11	9.22119	2.4394	1.10747	2.20268	0.0276171	0.344447
WBGene00004426	rpl-14	58545.9	1.08603	0.493121	2.20235	0.0276404	0.344508	Ribosomal Protein, Large subunit [Source:UniProtKB/TrEMBL;Acc:Q9XVE9]
WBGene00011131	R07H5.11	87.3079	0.830314	0.377084	2.20194	0.0276699	0.344582
WBGene00022412	Y102A11A.2	90.6231	-0.92488	0.420117	-2.20148	0.0277019	0.344582
WBGene00219711	anr-49	8.92382	1.63711	0.7436	2.2016	0.0276934	0.344582	NA
WBGene00004499	rps-30	59808.1	1.02512	0.465822	2.20068	0.0277589	0.344618	40S ribosomal protein S30 [Source:UniProtKB/TrEMBL;Acc:Q18231]
WBGene00010322	F59B10.6	27.5177	-1.13094	0.513865	-2.20084	0.0277472	0.344618
WBGene00012423	Y10G11A.1	2748.41	0.652973	0.296717	2.20066	0.0277602	0.344618	5'-nucleotidase [Source:UniProtKB/TrEMBL;Acc:Q95ZJ9]
WBGene00017907	F28F9.3	87.1687	1.38088	0.627764	2.19967	0.02783	0.345255
WBGene00012831	Y43F8C.9	42.8756	1.86146	0.846651	2.19862	0.027905	0.345725
WBGene00016904	C53D5.3	12.1851	-1.25829	0.572271	-2.19877	0.0278943	0.345725
WBGene00009796	F46G10.1	4061.59	0.874905	0.398196	2.19717	0.0280084	0.346776
WBGene00004700	rsp-3	24247.9	0.9254	0.421278	2.19665	0.0280455	0.347004	Probable splicing factor, arginine/serine-rich 3 [Source:UniProtKB/Swiss-Prot;Acc:Q9NEW6]
WBGene00006619	try-1	2174.38	0.908715	0.413957	2.19519	0.0281498	0.34754	TRYpsin-like protease [Source:UniProtKB/TrEMBL;Acc:Q23528]
WBGene00008666	F10G8.8	517.148	-0.587475	0.267705	-2.19448	0.0282006	0.34754
WBGene00010912	gmps-1	3922.78	0.511439	0.233015	2.19487	0.0281726	0.34754	Probable GMP synthase [glutamine-hydrolyzing] [Source:UniProtKB/Swiss-Prot;Acc:Q09580]
WBGene00019287	K01A12.3	25.2484	-1.10342	0.502789	-2.19459	0.0281927	0.34754	Probable G-protein coupled receptor K01A12.3 [Source:UniProtKB/Swiss-Prot;Acc:Q10042]
WBGene00022244	Y73B6BL.23	2327.47	0.636106	0.289769	2.19522	0.028148	0.34754
WBGene00043705	egrh-2	112.739	-0.555868	0.253273	-2.19474	0.028182	0.34754	EGR (Early Growth factor Response factor) Homolog [Source:UniProtKB/TrEMBL;Acc:U4PBA8]
WBGene00001627	gly-2	117.636	-0.998313	0.455118	-2.19352	0.0282696	0.34765	Alpha-1,6-mannosylglycoprotein 6-beta-N-acetylglucosaminyltransferase [Source:UniProtKB/Swiss-Prot;Acc:Q9NDH7]
WBGene00010374	rga-5	264.146	-0.611145	0.278639	-2.19332	0.028284	0.34765	Rho GTPase Activating protein [Source:UniProtKB/TrEMBL;Acc:D3YT92]
WBGene00016893	C53B7.2	1152.74	0.986212	0.449508	2.19398	0.0282367	0.34765
WBGene00206373	C27A2.12	108.519	-0.878157	0.400322	-2.19363	0.0282621	0.34765
WBGene00016639	C44B12.6	57.4999	0.934825	0.42631	2.19283	0.0283195	0.347703
WBGene00018172	F38B6.2	30.0792	-1.16068	0.529326	-2.19275	0.0283257	0.347703
WBGene00015326	ivd-1	5212.87	0.500345	0.22824	2.19219	0.0283657	0.347965	IsoValeryl-CoA Dehydrogenase; Isovaleryl-CoA dehydrogenase [Source:UniProtKB/TrEMBL;Acc:G5EEH6]
WBGene00000620	col-43	1156.3	3.04434	1.38923	2.19139	0.0284233	0.348032	COLlagen; Collagen [Source:UniProtKB/TrEMBL;Acc:G5ED38]
WBGene00003604	nhr-5	185.137	-0.672681	0.307179	-2.18986	0.0285342	0.348032	Nuclear hormone receptor family member nhr-5 [Source:UniProtKB/Swiss-Prot;Acc:Q9NA51]
WBGene00008309	nhr-170	67.3313	-0.609287	0.278204	-2.19007	0.028519	0.348032	Nuclear Hormone Receptor family [Source:UniProtKB/TrEMBL;Acc:O45315]
WBGene00008761	F13E9.12	66.7849	1.25537	0.573039	2.19073	0.0284711	0.348032
WBGene00009586	F40F9.10	91.5516	-0.671714	0.306716	-2.19002	0.0285231	0.348032
WBGene00011325	T01C3.11	117.357	1.46517	0.669204	2.18941	0.0285667	0.348032
WBGene00015196	B0454.5	667.064	0.99758	0.455567	2.18976	0.0285419	0.348032
WBGene00020012	R11G1.6	346.833	-0.891001	0.406913	-2.18966	0.0285488	0.348032
WBGene00021773	fbxb-42	161.16	0.987199	0.450924	2.18928	0.0285765	0.348032	F-box B protein [Source:UniProtKB/TrEMBL;Acc:Q9N3J6]
WBGene00045456	C10A4.9	70.3623	0.718103	0.327816	2.19057	0.028483	0.348032
WBGene00077673	B0563.10	128.4	2.17135	0.991089	2.19087	0.0284611	0.348032
WBGene00012221	W03C9.5	1210.83	1.1299	0.5162	2.18887	0.0286062	0.348166
WBGene00004703	rsp-6	14313	0.987459	0.451283	2.18812	0.0286611	0.348607	Probable splicing factor, arginine/serine-rich 6 [Source:UniProtKB/Swiss-Prot;Acc:Q18409]
WBGene00021475	tbca-1	3860.27	0.957954	0.437932	2.18745	0.0287096	0.34897	Tubulin-specific chaperone A [Source:UniProtKB/TrEMBL;Acc:Q95XR1]
WBGene00004743	scm-1	4673.09	0.545387	0.249449	2.18637	0.0287888	0.349022	Secretory carrier-associated membrane protein [Source:UniProtKB/TrEMBL;Acc:G5EED5]
WBGene00011531	rsbp-1	659.368	-0.814627	0.372579	-2.18645	0.0287825	0.349022	R-Seven Binding Protein (R7BP) homolog [Source:UniProtKB/TrEMBL;Acc:Q9U379]
WBGene00014117	clec-91	5787.28	0.841314	0.384689	2.187	0.0287428	0.349022	C-type lectin domain-containing protein 91 [Source:UniProtKB/Swiss-Prot;Acc:Q94417]
WBGene00016931	C54G6.2	13.9025	1.52756	0.698609	2.18657	0.0287736	0.349022
WBGene00013962	ZK287.1	186.266	-0.692721	0.316887	-2.18602	0.0288142	0.349102
WBGene00000941	ddp-1	2661.27	1.29192	0.592093	2.18195	0.0291131	0.349319	Mitochondrial import inner membrane translocase subunit Tim8 [Source:UniProtKB/Swiss-Prot;Acc:Q9N408]
WBGene00001039	dnj-21	1083.06	1.04856	0.480674	2.18145	0.0291505	0.349319	Mitochondrial import inner membrane translocase subunit TIM14 [Source:UniProtKB/Swiss-Prot;Acc:P91454]
WBGene00005726	srv-15	19.5462	1.09122	0.499731	2.18362	0.0289901	0.349319	Serpentine Receptor, class V [Source:UniProtKB/TrEMBL;Acc:Q2HQL3]
WBGene00006048	ssp-31	43.3421	3.24091	1.48413	2.18371	0.0289837	0.349319	Sperm-specific class P protein 31 [Source:UniProtKB/Swiss-Prot;Acc:Q9XXL3]
WBGene00006829	unc-101	2291.34	0.471747	0.216093	2.18307	0.0290303	0.349319	AP-1 complex subunit mu-1-I [Source:UniProtKB/Swiss-Prot;Acc:P35602]
WBGene00007555	dohh-1	3734.35	0.636434	0.291726	2.18162	0.0291379	0.349319	Deoxyhypusine hydroxylase [Source:UniProtKB/Swiss-Prot;Acc:Q17949]
WBGene00007592	C14H10.2	849.768	-0.649086	0.297204	-2.18398	0.0289641	0.349319
WBGene00009691	F44E5.4	56.7599	0.892727	0.408988	2.18277	0.0290529	0.349319
WBGene00013208	Y54G9A.5	2198.63	0.790973	0.362413	2.18252	0.0290714	0.349319
WBGene00018643	drd-50	1110.99	1.08844	0.498519	2.18334	0.0290106	0.349319	Dietary restriction down regulated [Source:UniProtKB/TrEMBL;Acc:Q9GZE5]
WBGene00020595	T20B5.2	66.5319	-1.14276	0.523328	-2.18364	0.0289889	0.349319
WBGene00021419	eri-5	1353.49	0.690456	0.316218	2.18348	0.0290005	0.349319	Enhanced RNAI (RNA interference) [Source:UniProtKB/TrEMBL;Acc:U4PMJ7]
WBGene00021444	ttc-7	1267	0.695753	0.318463	2.18472	0.0289096	0.349319	TeTratriCopeptide repeat domain protein related [Source:UniProtKB/TrEMBL;Acc:F8WU09]
WBGene00022310	Y77E11A.7	2935.51	0.693007	0.317673	2.18151	0.0291459	0.349319
WBGene00022505	ZC21.3	260.121	-1.21927	0.55887	-2.18166	0.0291343	0.349319
WBGene00044433	W10C8.6	132.368	1.28624	0.58862	2.18519	0.0288752	0.349319
WBGene00219661	linc-45	12.8768	1.24506	0.570158	2.18372	0.0289831	0.349319	NA
WBGene00019813	ger-1	762.051	0.529759	0.242947	2.18055	0.0292164	0.349884	GDP-L-fucose synthase [Source:UniProtKB/Swiss-Prot;Acc:G5EER4]
WBGene00012476	Y18D10A.3	207.347	0.742694	0.340753	2.17957	0.0292894	0.350533	NAD(P)H-hydrate epimerase [Source:RefSeq peptide;Acc:NP_493241]
WBGene00000998	dig-1	1011.61	-0.774542	0.355634	-2.17792	0.0294119	0.351097	Mesocentin [Source:UniProtKB/Swiss-Prot;Acc:Q09165]
WBGene00011513	fbxa-197	413.799	0.48411	0.22227	2.17803	0.0294039	0.351097	F-box A protein [Source:UniProtKB/TrEMBL;Acc:O18043]
WBGene00016355	lact-5	411.342	-0.723364	0.332121	-2.17801	0.0294052	0.351097	Beta-LACTamase domain containing [Source:UniProtKB/TrEMBL;Acc:Q18384]
WBGene00018863	F55A12.2	712.549	0.693031	0.318177	2.17813	0.0293965	0.351097
WBGene00012376	nduf-7	7661.98	0.828268	0.380383	2.17746	0.0294463	0.351246	Probable NADH dehydrogenase [ubiquinone] iron-sulfur protein 7, mitochondrial [Source:UniProtKB/Swiss-Prot;Acc:Q94360]
WBGene00019079	rpa-4	75.8236	-0.849425	0.390137	-2.17725	0.0294621	0.351246	Replication Protein A homolog [Source:UniProtKB/TrEMBL;Acc:Q8I7G2]
WBGene00011712	T11F9.10	26.4037	1.29146	0.593337	2.17661	0.0295095	0.351588
WBGene00017180	F02E11.2	152.715	0.868465	0.399206	2.17548	0.0295939	0.352368
WBGene00013135	rga-2	235.149	-0.399016	0.183459	-2.17496	0.0296331	0.352609	Rho GTPase Activating protein [Source:UniProtKB/TrEMBL;Acc:Q9XW53]
WBGene00000072	add-1	304.54	-0.481774	0.222048	-2.16968	0.030031	0.353406	Adducin-related protein 1 [Source:UniProtKB/Swiss-Prot;Acc:Q9U9K0]
WBGene00001404	fbp-1	6244.07	0.763456	0.351856	2.1698	0.0300223	0.353406	Fructose-1,6-BiPhosphatase; Fructose-1,6-bisphosphatase [Source:UniProtKB/TrEMBL;Acc:G5EBJ7]
WBGene00003634	nhr-44	160.172	-0.637353	0.293993	-2.16792	0.0301651	0.353406	Nuclear hormone receptor family member nhr-44 [Source:UniProtKB/Swiss-Prot;Acc:Q22555]
WBGene00003924	pas-3	12130.5	0.702436	0.323867	2.1689	0.0300902	0.353406	Proteasome subunit alpha type-4 [Source:UniProtKB/Swiss-Prot;Acc:Q9N599]
WBGene00004739	scd-1	1941.05	-0.438562	0.202251	-2.1684	0.0301281	0.353406	Suppressor of Constitutive Dauer formation [Source:UniProtKB/TrEMBL;Acc:Q8MQ12]
WBGene00004819	skr-13	839.243	0.795421	0.366349	2.17121	0.0299154	0.353406	SKR-13; SKp1 Related (Ubiquitin ligase complex component) [Source:UniProtKB/TrEMBL;Acc:G5EEX4]
WBGene00004989	spp-4	689.383	1.22345	0.563444	2.17139	0.029902	0.353406	SaPosin-like Protein family [Source:UniProtKB/TrEMBL;Acc:Q22338]
WBGene00006051	ssq-2	677.383	3.72316	1.71532	2.17053	0.029967	0.353406	Sperm-Specific family, class Q [Source:UniProtKB/TrEMBL;Acc:Q23057]
WBGene00008174	C48B4.11	1201.49	0.536584	0.246967	2.17269	0.0298035	0.353406
WBGene00008590	F08H9.2	108.857	2.21054	1.01925	2.1688	0.030098	0.353406
WBGene00008677	F11A5.9	1795.87	0.987761	0.454701	2.17233	0.0298307	0.353406
WBGene00008917	F17C11.6	277.17	0.831365	0.382597	2.17295	0.0297841	0.353406
WBGene00010160	png-1	1874.96	0.516845	0.238075	2.17093	0.0299364	0.353406	Peptide-N(4)-(N-acetyl-beta-glucosaminyl)asparagine amidase [Source:UniProtKB/Swiss-Prot;Acc:Q9TW67]
WBGene00011321	fil-1	236.219	1.31909	0.607508	2.17131	0.0299075	0.353406	Fasting Induced Lipase [Source:UniProtKB/TrEMBL;Acc:Q22060]
WBGene00011526	cox-15	2580.1	0.55077	0.25385	2.16967	0.0300317	0.353406	Cytochrome OXidase assembly protein [Source:UniProtKB/TrEMBL;Acc:Q22251]
WBGene00012487	Y18D10A.23	194.46	0.85005	0.391659	2.17038	0.029978	0.353406
WBGene00013127	Y52B11A.8	2606.05	0.901715	0.415846	2.16839	0.0301293	0.353406	Phospholipase A2-like protein Y52B11A.8 [Source:UniProtKB/Swiss-Prot;Acc:Q9U256]
WBGene00014083	ZK795.3	2069.72	0.444881	0.20489	2.17132	0.0299071	0.353406	Brix domain-containing protein ZK795.3 [Source:UniProtKB/Swiss-Prot;Acc:O62518]
WBGene00015185	mrpl-41	2530.39	1.1101	0.510804	2.17325	0.0297617	0.353406	39S ribosomal protein L41, mitochondrial [Source:UniProtKB/Swiss-Prot;Acc:P90993]
WBGene00017978	msrp-1	58.4814	3.26389	1.505	2.16869	0.030106	0.353406	MS Related Protein [Source:UniProtKB/TrEMBL;Acc:O01851]
WBGene00019537	K08D12.3	34196.6	1.2375	0.570923	2.16755	0.0301929	0.353406
WBGene00020035	egg-5	1378.36	0.828153	0.381284	2.17201	0.0298547	0.353406	EGG sterile (Unfertilizable) [Source:UniProtKB/TrEMBL;Acc:O61789]
WBGene00020478	T13C2.2	41.3115	-1.01586	0.468638	-2.16768	0.030183	0.353406
WBGene00022057	Y67D2.7	3080.07	0.501336	0.230762	2.17253	0.0298158	0.353406
WBGene00022169	Y71H2AM.4	3171.61	1.32836	0.611379	2.17273	0.0298008	0.353406
WBGene00022261	clec-210	58.9481	1.84426	0.850599	2.16819	0.0301439	0.353406	C-type LECtin [Source:UniProtKB/TrEMBL;Acc:Q9TXW7]
WBGene00044708	pals-11	6.89663	-1.91757	0.885186	-2.16629	0.0302891	0.35431	Protein containing ALS2cr12 (ALS2CR12) domain [Source:UniProtKB/TrEMBL;Acc:Q2L6U4]
WBGene00017058	msrp-6	30.7015	4.29286	1.98208	2.16583	0.0303239	0.354495	MS Related Protein [Source:UniProtKB/TrEMBL;Acc:O16596]
WBGene00003431	msp-33	147.16	3.86156	1.78364	2.16498	0.0303889	0.354588	Major sperm protein 33 [Source:UniProtKB/Swiss-Prot;Acc:P53019]
WBGene00012193	vps-25	1368.82	0.714547	0.330034	2.16507	0.0303821	0.354588	Related to yeast Vacuolar Protein Sorting factor [Source:UniProtKB/TrEMBL;Acc:Q9U354]
WBGene00016805	C50D2.1	164.217	-1.25392	0.579054	-2.16547	0.0303519	0.354588
WBGene00004418	rpl-7	105221	0.754144	0.348666	2.16294	0.0305459	0.355308	60S ribosomal protein L7 [Source:UniProtKB/Swiss-Prot;Acc:O01802]
WBGene00006364	syd-2	585.177	-0.509211	0.23535	-2.16364	0.0304923	0.355308	Liprin-alpha [Source:UniProtKB/Swiss-Prot;Acc:Q21049]
WBGene00009862	fbxb-67	144.488	0.718272	0.332032	2.16327	0.0305208	0.355308	F-box B protein [Source:UniProtKB/TrEMBL;Acc:O45536]
WBGene00021347	rpb-10	2679.56	1.00655	0.465319	2.16315	0.0305299	0.355308	DNA-directed RNA polymerases I, II, and III subunit RPABC5 [Source:UniProtKB/Swiss-Prot;Acc:Q9GR61]
WBGene00195150	Y81G3A.6	18.6636	1.1689	0.540284	2.16349	0.0305033	0.355308
WBGene00000889	cyn-13	5187.9	0.621062	0.287173	2.16268	0.030566	0.35532	Peptidyl-prolyl cis-trans isomerase [Source:UniProtKB/TrEMBL;Acc:D3NQB1]
WBGene00000063	act-1	7903.46	1.01126	0.467988	2.16086	0.030706	0.355618	Actin-1 [Source:UniProtKB/Swiss-Prot;Acc:P0DM41]
WBGene00006738	ulp-3	787.217	1.0651	0.492898	2.16089	0.0307039	0.355618	Ubiquitin-Like Protease [Source:UniProtKB/TrEMBL;Acc:Q86FN3]
WBGene00010783	mrpl-36	1003.16	1.37868	0.637691	2.16198	0.0306194	0.355618	Ribosomal protein [Source:UniProtKB/TrEMBL;Acc:Q7YWY8]
WBGene00016064	acd-1	137.995	-1.19192	0.55159	-2.16088	0.030705	0.355618
WBGene00018305	exos-8	1936.55	0.551978	0.255439	2.1609	0.030703	0.355618	EXOSome (Multiexonuclease complex) component [Source:UniProtKB/TrEMBL;Acc:Q95QG7]
WBGene00021774	fbxb-43	137.926	0.736757	0.340853	2.16151	0.0306562	0.355618	F-box B protein [Source:UniProtKB/TrEMBL;Acc:Q9N3J7]
WBGene00001168	eef-1A.1	315288	0.495137	0.229219	2.1601	0.0307646	0.35563	Elongation factor 1-alpha [Source:UniProtKB/Swiss-Prot;Acc:P53013]
WBGene00008173	C48B4.10	1016.58	0.790988	0.366222	2.15986	0.0307834	0.35563
WBGene00015619	C08G9.1	444.724	0.915682	0.42382	2.16054	0.0307306	0.35563
WBGene00015720	C13A2.3	48.3566	-1.71518	0.793996	-2.16019	0.0307583	0.35563
WBGene00007053	chd-7	2356.09	-0.4622	0.214049	-2.15932	0.0308251	0.355671	Chromodomain and Helicase Domain protein [Source:UniProtKB/TrEMBL;Acc:O61845]
WBGene00077756	Y11D7A.19	32.3285	-1.02011	0.47238	-2.15951	0.0308106	0.355671
WBGene00006470	tag-120	1856.59	0.971176	0.450204	2.15719	0.0309907	0.356046
WBGene00008041	ufc-1	2008.92	0.831609	0.385339	2.15812	0.0309181	0.356046	Ubiquitin-fold modifier-conjugating enzyme 1 [Source:UniProtKB/Swiss-Prot;Acc:Q03598]
WBGene00017048	D2021.4	118.902	-0.664836	0.308196	-2.15719	0.0309912	0.356046
WBGene00020126	flp-26	200.92	1.29171	0.598754	2.15734	0.0309796	0.356046	FMRFamide-like neuropeptides 26 EFNADDLTLRF-amide GGAGEPLAFSPDMLSLRF-amide [Source:UniProtKB/Swiss-Prot;Acc:Q8MPY9]
WBGene00021646	Y47G6A.21	1242.83	0.744584	0.34506	2.15784	0.0309405	0.356046
WBGene00021892	Y54G2A.28	23.7307	1.23373	0.571735	2.15787	0.0309378	0.356046
WBGene00022970	CD4.10	212.788	0.997598	0.462375	2.15755	0.0309626	0.356046
WBGene00219742	linc-52	16.464	2.24388	1.04046	2.15663	0.0310345	0.356323	NA
WBGene00010941	gss-1	2132.19	0.345361	0.16018	2.15608	0.0310777	0.3566	Glutathione synthetase [Source:UniProtKB/TrEMBL;Acc:Q21549]
WBGene00001389	far-5	325.294	0.515653	0.239314	2.15471	0.0311843	0.356629	Fatty Acid/Retinol binding protein [Source:UniProtKB/TrEMBL;Acc:Q19480]
WBGene00007387	jmjd-5	1072.48	0.478844	0.222245	2.15458	0.031195	0.356629	JuMonJi (Transcription factor) Domain protein [Source:UniProtKB/TrEMBL;Acc:Q17765]
WBGene00007776	dmd-4	43.5357	-0.850209	0.394499	-2.15516	0.0311491	0.356629	DM (Doublesex/MAB-3) Domain family [Source:UniProtKB/TrEMBL;Acc:Q18248]
WBGene00011959	nyn-1	1254.7	0.550824	0.255604	2.15499	0.0311624	0.356629	NYN domain ribonuclease homolog [Source:UniProtKB/TrEMBL;Acc:O18125]
WBGene00021270	Y23H5A.3	5686.59	0.651237	0.302181	2.15512	0.0311525	0.356629
WBGene00021887	fbxc-45	623.17	0.518647	0.240666	2.15505	0.0311577	0.356629	F-box C protein [Source:UniProtKB/TrEMBL;Acc:Q9N3B1]
WBGene00003583	ndx-6	1004	0.77357	0.359167	2.15379	0.0312564	0.356761	Putative nudix hydrolase 6 [Source:UniProtKB/Swiss-Prot;Acc:Q09297]
WBGene00016322	C32E8.4	50.3928	2.99484	1.39056	2.1537	0.031264	0.356761
WBGene00185001	F56A8.9	225.981	-0.477498	0.2217	-2.15381	0.0312552	0.356761
WBGene00000656	col-80	4666.17	1.159	0.538489	2.15231	0.0313727	0.35717	Putative cuticle collagen 80 [Source:UniProtKB/Swiss-Prot;Acc:Q09456]
WBGene00001933	his-59	146.842	1.11765	0.519526	2.15129	0.0314531	0.35717	Histone H3 [Source:UniProtKB/Swiss-Prot;Acc:P08898]
WBGene00007973	C36B1.6	227.442	0.966809	0.449345	2.1516	0.0314292	0.35717
WBGene00015814	oatr-1	6736.02	0.541654	0.251749	2.15156	0.0314318	0.35717	Probable ornithine aminotransferase, mitochondrial [Source:UniProtKB/Swiss-Prot;Acc:Q18040]
WBGene00020075	math-35	95.4082	-0.725033	0.33689	-2.15214	0.0313865	0.35717
WBGene00021703	cpt-3	146.958	1.307	0.607434	2.15167	0.0314236	0.35717	Carnitine Palmitoyl Transferase [Source:UniProtKB/TrEMBL;Acc:Q9N3N3]
WBGene00022452	Y110A2AR.1	6756.58	0.784183	0.364457	2.15164	0.0314254	0.35717	Receptor expression-enhancing protein [Source:UniProtKB/TrEMBL;Acc:Q9N488]
WBGene00235263	Y66H1A.8	14.5938	-1.39305	0.647532	-2.15132	0.0314512	0.35717
WBGene00012932	Y47D3A.21	2350.43	0.3904	0.181567	2.15017	0.0315417	0.357958	Density-regulated protein homolog [Source:UniProtKB/Swiss-Prot;Acc:Q9NAH4]
WBGene00013319	ccch-5	323.016	0.895492	0.416619	2.14943	0.0316005	0.357973	CCCH-type zinc finger putative transcription factor [Source:UniProtKB/TrEMBL;Acc:O18251]
WBGene00021210	Y18H1A.4	1353.24	0.923592	0.429639	2.14969	0.0315795	0.357973
WBGene00021845	rpb-7	4430.85	0.654846	0.304659	2.14944	0.0315996	0.357973	RNA Polymerase II (B) subunit [Source:UniProtKB/TrEMBL;Acc:Q9N3C9]
WBGene00044217	F23D12.9	35.1191	0.931876	0.433762	2.14836	0.0316854	0.358716
WBGene00197317	T22F3.14	4.56099	2.39644	1.11596	2.14742	0.03176	0.359342	NA
WBGene00009899	efl-3	897.463	-0.742036	0.345617	-2.14699	0.0317944	0.359514	E2F-like (Mammalian transcription factor) [Source:UniProtKB/TrEMBL;Acc:Q20619]
WBGene00003648	nhr-58	572.479	0.751943	0.350301	2.14656	0.0318282	0.359678	Nuclear Hormone Receptor family [Source:UniProtKB/TrEMBL;Acc:O16960]
WBGene00003758	nlp-20	816.711	1.12939	0.526229	2.1462	0.031857	0.359678	Neuropeptide-Like Protein [Source:UniProtKB/TrEMBL;Acc:Q94233]
WBGene00010609	dut-1	8883.01	0.592242	0.276018	2.14566	0.0319	0.359678	DeoxyUTPase; Deoxyuridinetriphosphatase [Source:UniProtKB/TrEMBL;Acc:G5EET2]
WBGene00012886	Y45F10D.6	110.073	0.87172	0.406238	2.14584	0.0318861	0.359678
WBGene00016032	C24A3.1	5.11541	-1.84917	0.861845	-2.14559	0.0319054	0.359678
WBGene00001819	haf-9	1991.89	-0.852101	0.398037	-2.14076	0.0322937	0.359754	HAlF transporter (PGP related) [Source:UniProtKB/TrEMBL;Acc:Q8IA64]
WBGene00001979	hmp-2	4055	0.426588	0.199145	2.14209	0.032186	0.359754	Beta-catenin-like protein hmp-2 [Source:UniProtKB/Swiss-Prot;Acc:O44326]
WBGene00003246	mig-14	2187.61	0.731626	0.341538	2.14215	0.0321812	0.359754	Protein wntless homolog [Source:UniProtKB/Swiss-Prot;Acc:Q7YWX7]
WBGene00003526	nas-7	229.056	-0.878857	0.410119	-2.14293	0.0321189	0.359754	Zinc metalloproteinase nas-7 [Source:UniProtKB/Swiss-Prot;Acc:P55113]
WBGene00003678	nhr-88	908.082	0.605588	0.282405	2.1444	0.0320012	0.359754	Nuclear Hormone Receptor family [Source:UniProtKB/TrEMBL;Acc:H2KZA1]
WBGene00004487	rps-18	72554.9	0.881357	0.411629	2.14114	0.0322625	0.359754	Ribosomal Protein, Small subunit [Source:UniProtKB/TrEMBL;Acc:O18240]
WBGene00006700	uba-2	3195.82	0.823473	0.384643	2.14088	0.0322837	0.359754	SUMO-activating enzyme subunit uba-2 [Source:UniProtKB/Swiss-Prot;Acc:Q9NAN1]
WBGene00008067	C43D7.4	8.74611	-1.72441	0.804064	-2.14462	0.0319832	0.359754
WBGene00009831	F47G9.4	189.736	-0.748021	0.349428	-2.1407	0.032298	0.359754	Probable RING finger protein 207 homolog [Source:UniProtKB/Swiss-Prot;Acc:Q20548]
WBGene00010828	M02B1.3	6967.16	0.619818	0.289155	2.14355	0.0320689	0.359754
WBGene00011307	mpst-7	272.792	-0.784201	0.365656	-2.14464	0.0319817	0.359754	MercaptoPyruvate SulfurTransferase homolog [Source:UniProtKB/TrEMBL;Acc:G5EEV0]
WBGene00011612	T08D2.7	35.8913	1.00145	0.467665	2.14138	0.0322434	0.359754
WBGene00012864	Y45F3A.9	783.85	0.526709	0.245721	2.14352	0.0320712	0.359754
WBGene00013930	clec-96	13.3209	2.26167	1.05594	2.14185	0.0322059	0.359754	C-type LECtin [Source:UniProtKB/TrEMBL;Acc:Q9XUI5]
WBGene00018880	acc-3	30.8735	-0.900095	0.419788	-2.14417	0.0320195	0.359754	Acetylcholine-gated Chloride Channel; Acetylcholine-gated chloride channel subunit ACC-3 [Source:UniProtKB/TrEMBL;Acc:G5EDN0]
WBGene00019901	R05G6.9	72.4706	-1.0514	0.490627	-2.14297	0.0321152	0.359754
WBGene00022397	Y97E10AR.2	107.203	-0.654551	0.305172	-2.14486	0.0319641	0.359754
WBGene00022465	ift-20	12.6214	-1.31548	0.614158	-2.14192	0.0321997	0.359754	IFT (Chlamydomonas IntraFlagellar Transport) homolog [Source:UniProtKB/TrEMBL;Acc:Q8TA52]
WBGene00189949	Y48G1C.13	332.917	0.705211	0.329154	2.1425	0.0321535	0.359754
WBGene00219680	linc-35	33.2415	0.90847	0.424251	2.14135	0.032246	0.359754	NA
WBGene00017398	slc-17.6	557.973	0.506259	0.236523	2.14042	0.0323209	0.359794	SLC (SoLute Carrier) homolog [Source:UniProtKB/TrEMBL;Acc:X5M917]
WBGene00010041	F54C9.3	3812.79	0.92752	0.433388	2.14016	0.0323417	0.359811
WBGene00007243	nspb-7	9.84975	3.11147	1.45411	2.13978	0.0323729	0.359943	Nematode Specific Peptide family, group B [Source:UniProtKB/TrEMBL;Acc:O45234]
WBGene00018073	F35H10.10	1268.42	-0.580591	0.271476	-2.13865	0.0324642	0.360743	CELF35-1 [Source:UniProtKB/TrEMBL;Acc:G5ECZ3]
WBGene00000474	cey-3	27659.4	0.660714	0.30903	2.13802	0.0325148	0.36109	C. Elegans Y-box [Source:UniProtKB/TrEMBL;Acc:P91398]
WBGene00021072	W07B8.4	62.0426	2.01484	0.94252	2.13771	0.0325399	0.361154
WBGene00002086	ins-3	80.1499	0.549301	0.257029	2.13712	0.0325882	0.361475	Probable insulin-like peptide beta-type 3 [Source:UniProtKB/Swiss-Prot;Acc:Q09628]
WBGene00000758	col-185	40.8618	3.27909	1.53586	2.13502	0.0327594	0.36226	COLlagen [Source:UniProtKB/TrEMBL;Acc:Q7YXA3]
WBGene00010185	F57A10.4	339.896	0.779129	0.364879	2.13531	0.0327357	0.36226
WBGene00012457	acbp-6	120.107	1.32638	0.621215	2.13513	0.0327504	0.36226	Acyl-Coenzyme A Binding Protein [Source:UniProtKB/TrEMBL;Acc:Q9XXJ2]
WBGene00014102	best-25	23.2303	1.39553	0.653697	2.13482	0.0327755	0.36226	Bestrophin homolog 25 [Source:UniProtKB/Swiss-Prot;Acc:O18303]
WBGene00019649	K11D12.9	67.8508	-0.593746	0.278007	-2.13572	0.032702	0.36226
WBGene00022045	mrpl-55	998.542	1.04491	0.489349	2.13531	0.0327354	0.36226	Mitochondrial Ribosomal Protein, Large [Source:UniProtKB/TrEMBL;Acc:Q9TYJ8]
WBGene00001961	hlh-17	15.2591	1.49436	0.700847	2.13222	0.0329887	0.36246	Helix Loop Helix [Source:UniProtKB/TrEMBL;Acc:O45489]
WBGene00002177	jkk-1	28.6148	-0.978063	0.459093	-2.13042	0.0331367	0.36246	Dual specificity mitogen-activated protein kinase kinase jkk-1 [Source:UniProtKB/Swiss-Prot;Acc:G5EDT6]
WBGene00002216	klp-3	296.975	-0.904484	0.424383	-2.13129	0.0330652	0.36246	Kinesin-like protein klp-3 [Source:UniProtKB/Swiss-Prot;Acc:P45962]
WBGene00004271	rab-7	5430.33	0.563635	0.264302	2.13255	0.0329621	0.36246	RAB family [Source:UniProtKB/TrEMBL;Acc:Q23146]
WBGene00006757	unc-18	1687.73	-0.604376	0.283589	-2.13117	0.0330751	0.36246	Putative acetylcholine regulator unc-18 [Source:RefSeq peptide;Acc:NP_001024606]
WBGene00007449	C08F8.9	1147.77	1.15603	0.541951	2.13308	0.0329179	0.36246
WBGene00009118	F25H2.4	3130.99	0.556863	0.261279	2.1313	0.0330645	0.36246
WBGene00009190	F27D4.6	210.565	-0.762247	0.357394	-2.13279	0.0329418	0.36246
WBGene00009562	flp-22	843.528	0.736788	0.345484	2.13262	0.0329557	0.36246	FMRF-Like Peptide [Source:UniProtKB/TrEMBL;Acc:Q93702]
WBGene00009670	F43G9.8	7.19484	-1.88991	0.885593	-2.13406	0.0328378	0.36246
WBGene00010705	cyp-14A1	47.0553	-0.740766	0.347486	-2.13179	0.0330243	0.36246	CYtochrome P450 family [Source:UniProtKB/TrEMBL;Acc:Q27506]
WBGene00018669	F52C6.12	83.6009	0.821639	0.385059	2.1338	0.0328589	0.36246
WBGene00019372	K03H9.3	11.309	-1.44357	0.677699	-2.1301	0.033163	0.36246
WBGene00020700	T22F3.11	632.77	2.9478	1.38373	2.13033	0.0331445	0.36246
WBGene00020895	T28D9.3	749.556	0.635217	0.297642	2.13417	0.0328293	0.36246
WBGene00022203	Y73B3A.1	2005.02	0.677021	0.317756	2.13063	0.0331197	0.36246
WBGene00022377	gpx-4	48.2628	0.605147	0.284081	2.13019	0.0331559	0.36246	Glutathione peroxidase [Source:UniProtKB/TrEMBL;Acc:Q9N2X2]
WBGene00044304	F52B10.3	162.188	-0.56758	0.26638	-2.13072	0.0331124	0.36246
WBGene00044548	cnc-9	11.8861	3.42296	1.60469	2.1331	0.0329163	0.36246	CaeNaCin (Caenorhabditis bacteriocin) [Source:UniProtKB/TrEMBL;Acc:Q4R175]
WBGene00001919	his-45	3.23624	2.86883	1.34829	2.12776	0.0333571	0.362805	Histone H3 [Source:UniProtKB/Swiss-Prot;Acc:P08898]
WBGene00009044	F22B5.6	51.7722	0.860397	0.404256	2.12835	0.0333083	0.362805
WBGene00012379	Y1A5A.1	178.293	3.23547	1.51959	2.12918	0.0332395	0.362805
WBGene00021861	Y54F10BM.6	43.5249	1.13877	0.53506	2.12831	0.0333114	0.362805
WBGene00022499	set-30	634.22	-0.695604	0.326731	-2.12898	0.0332557	0.362805	SET (Trithorax/polycomb) domain containing [Source:UniProtKB/TrEMBL;Acc:Q23084]
WBGene00022705	ZK354.2	668.676	1.37764	0.647391	2.12799	0.0333383	0.362805
WBGene00022817	upp-1	3094.01	0.660998	0.310675	2.12762	0.0333687	0.362805	Uridine and thymidine phosphorylase [Source:UniProtKB/Swiss-Prot;Acc:Q23588]
WBGene00206385	T06D4.6	60.7137	0.96007	0.451244	2.12761	0.0333696	0.362805
WBGene00219590	linc-72	6.13407	1.63374	0.76766	2.12821	0.0333196	0.362805
WBGene00001976	hmg-11	8447.93	1.29239	0.607761	2.12648	0.0334634	0.362978	HMG; High mobility group protein I alpha [Source:UniProtKB/TrEMBL;Acc:G5EEL9]
WBGene00005620	srj-35	3.466	1.91241	0.899268	2.12663	0.0334506	0.362978
WBGene00006926	vit-2	292111	0.812608	0.382038	2.12703	0.0334173	0.362978	Vitellogenin-2 [Source:UniProtKB/Swiss-Prot;Acc:P05690]
WBGene00022476	fbxa-75	24.0974	-1.80843	0.850286	-2.12684	0.033433	0.362978	F-box A protein [Source:UniProtKB/TrEMBL;Acc:Q966E2]
WBGene00001119	dyf-3	451.932	0.806145	0.379192	2.12595	0.0335071	0.363241	Clusterin-associated protein 1 homolog [Source:UniProtKB/Swiss-Prot;Acc:Q6I6D4]
WBGene00000169	aqp-1	2006.25	1.23721	0.584064	2.11828	0.0341515	0.363256	AQuaPorin or aquaglyceroporin related [Source:UniProtKB/TrEMBL;Acc:Q8IG23]
WBGene00000534	cpi-2	8551.55	0.668019	0.315277	2.11883	0.0341046	0.363256	Cystatin [Source:UniProtKB/TrEMBL;Acc:G5ECM9]
WBGene00002248	lam-3	615.127	-0.898996	0.42378	-2.12138	0.0338901	0.363256	LAMinin related. See also lmb; Laminin alpha chain [Source:UniProtKB/TrEMBL;Acc:G5ECE3]
WBGene00004446	rpl-32	65980.4	1.11807	0.526851	2.12218	0.0338222	0.363256	Ribosomal Protein, Large subunit [Source:UniProtKB/TrEMBL;Acc:B7WN95]
WBGene00004987	spp-2	2554.48	1.71513	0.808971	2.12014	0.0339944	0.363256	SaPosin-like Protein family [Source:UniProtKB/TrEMBL;Acc:Q8MPX7]
WBGene00006839	unc-115	2924.91	-0.430349	0.202727	-2.1228	0.0337704	0.363256	Putative actin-binding protein UNC-115 [Source:UniProtKB/TrEMBL;Acc:O77133]
WBGene00006913	vha-4	8538.42	0.799799	0.377441	2.119	0.0340903	0.363256	VHA-4; Vacuolar H ATPase [Source:UniProtKB/TrEMBL;Acc:G5EDB8]
WBGene00007923	C34C12.4	1658.6	0.548019	0.258107	2.12322	0.0337351	0.363256
WBGene00008209	C49F5.5	16.7423	1.0363	0.488469	2.12153	0.0338768	0.363256
WBGene00008865	F15G9.1	2217.53	0.793692	0.373591	2.12449	0.0336291	0.363256
WBGene00009079	F23B12.1	85.6762	2.06327	0.973927	2.11851	0.034132	0.363256	Serine/threonine-protein phosphatase [Source:UniProtKB/TrEMBL;Acc:Q27495]
WBGene00009636	F42F12.4	658.928	0.979993	0.46143	2.12382	0.0336856	0.363256	1,2-dihydroxy-3-keto-5-methylthiopentene dioxygenase [Source:UniProtKB/TrEMBL;Acc:Q20340]
WBGene00009971	F53C11.1	1221.48	0.579215	0.273356	2.1189	0.0340988	0.363256
WBGene00010959	nduo-1	13951.5	0.86881	0.408828	2.12512	0.0335764	0.363256	NADH-ubiquinone oxidoreductase chain 1 [Source:UniProtKB/Swiss-Prot;Acc:P24887]
WBGene00011252	R11H6.4	245.14	0.768522	0.362193	2.12186	0.0338499	0.363256
WBGene00012994	Y48C3A.12	1514.92	1.06316	0.501343	2.12063	0.0339531	0.363256
WBGene00013367	Y60A3A.23	16.5785	2.82936	1.33208	2.12402	0.0336686	0.363256
WBGene00013408	fbxb-93	96.8307	1.0999	0.518414	2.12166	0.033866	0.363256	F-box B protein [Source:UniProtKB/TrEMBL;Acc:Q9XWG0]
WBGene00013849	ZC84.6	46.698	-0.994958	0.469574	-2.11885	0.034103	0.363256
WBGene00013934	ZK131.11	628.047	-0.590955	0.27895	-2.11849	0.0341333	0.363256
WBGene00016263	C30F12.4	2102.58	0.708208	0.333754	2.12195	0.0338422	0.363256
WBGene00017159	F01F1.2	1866.04	0.546731	0.257314	2.12476	0.0336069	0.363256
WBGene00017814	F26A10.2	93.3381	-0.841709	0.396493	-2.12289	0.0337633	0.363256
WBGene00018200	btb-17	222.381	0.471712	0.222637	2.11875	0.0341115	0.363256	BTB (Broad/complex/Tramtrack/Bric a brac) domain protein [Source:UniProtKB/TrEMBL;Acc:Q8ITZ2]
WBGene00018957	F56C11.5	1295.76	0.724151	0.341667	2.11946	0.0340512	0.363256
WBGene00020091	rnp-8	5829.01	0.763512	0.359787	2.12212	0.0338277	0.363256	RNP (RRM RNA binding domain) containing [Source:UniProtKB/TrEMBL;Acc:V6CLS0]
WBGene00020330	T07H6.1	115.117	-0.715376	0.336956	-2.12306	0.0337492	0.363256
WBGene00022194	Y71H2B.4	1935.87	1.12761	0.531168	2.12289	0.0337632	0.363256
WBGene00022393	abhd-12	3397.64	0.479083	0.22607	2.11918	0.0340752	0.363256	ABHydrolase Domain containing homolog [Source:UniProtKB/TrEMBL;Acc:Q965S2]
WBGene00044262	Y95D11A.2	16.9875	0.991146	0.466691	2.12377	0.0336892	0.363256
WBGene00044435	Y20F4.8	19.7041	-1.05701	0.498565	-2.12009	0.0339981	0.363256
WBGene00086565	W06G6.17	12.5421	1.40438	0.661361	2.12347	0.0337143	0.363256
WBGene00195032	Y37E3.24	5.71893	2.24226	1.05725	2.12083	0.0339358	0.363256
WBGene00001808	gut-2	1667.89	0.962213	0.454456	2.11728	0.0342357	0.363945
WBGene00001899	his-25	11.0862	1.94429	0.918664	2.11643	0.0343082	0.364099	Histone H3 [Source:UniProtKB/Swiss-Prot;Acc:P08898]
WBGene00004447	rpl-33	45985.1	0.969643	0.458199	2.11621	0.0343271	0.364099	60S ribosomal protein L35a [Source:UniProtKB/Swiss-Prot;Acc:P49180]
WBGene00010982	flp-32	191.572	1.40785	0.665274	2.11619	0.0343283	0.364099	FMRF-Like Peptide [Source:UniProtKB/TrEMBL;Acc:Q21656]
WBGene00012356	W09D6.1	649.724	0.498825	0.235701	2.11635	0.0343149	0.364099
WBGene00016190	C28G1.5	685.195	-0.600639	0.283937	-2.11539	0.0343964	0.364613
WBGene00006711	ubc-16	1968.22	0.507016	0.239711	2.11512	0.03442	0.364657	UBiquitin Conjugating enzyme [Source:UniProtKB/TrEMBL;Acc:Q9XWF6]
WBGene00020782	T24H7.3	2161.72	0.546118	0.258248	2.1147	0.0344556	0.364826
WBGene00017400	stg-2	94.794	0.549556	0.259921	2.11432	0.0344881	0.364963	STarGazin (Mammalian calcium channel) homolog; TARP-like protein STG-2 [Source:UniProtKB/TrEMBL;Acc:G5EBI8]
WBGene00021942	madf-1	212.763	0.713949	0.337799	2.11353	0.0345552	0.365466	MADF domain transcription factor [Source:UniProtKB/TrEMBL;Acc:U4PBX0]
WBGene00000179	aqp-11	1840.11	1.04959	0.497075	2.11153	0.0347269	0.365763	Aquaporin [Source:UniProtKB/TrEMBL;Acc:O46024]
WBGene00001109	dsl-7	25.8636	-0.948876	0.44921	-2.11232	0.034659	0.365763	Delta-like protein [Source:UniProtKB/TrEMBL;Acc:Q7YXD2]
WBGene00003525	nas-6	52.1781	-1.20198	0.569358	-2.11112	0.0347617	0.365763	Zinc metalloproteinase nas-6 [Source:UniProtKB/Swiss-Prot;Acc:Q9U3S9]
WBGene00004430	rpl-18	66253.7	0.871118	0.412807	2.11023	0.0348383	0.365763	60S ribosomal protein L18 [Source:UniProtKB/Swiss-Prot;Acc:O45946]
WBGene00008859	F15D4.2	967.667	0.814706	0.385677	2.1124	0.0346519	0.365763
WBGene00009925	F52B11.2	1809.37	0.678624	0.321573	2.11033	0.0348301	0.365763	Probable phosphomannomutase [Source:UniProtKB/Swiss-Prot;Acc:Q9XUE6]
WBGene00012606	Y38F1A.2	345.819	0.706781	0.334921	2.11029	0.0348332	0.365763
WBGene00013807	Y116A8C.30	1206.13	0.990832	0.469409	2.11081	0.034789	0.365763
WBGene00015620	C08G9.2	40.1749	-0.873125	0.413436	-2.11187	0.0346973	0.365763
WBGene00019246	rpb-5	5987.21	0.347558	0.164657	2.1108	0.0347894	0.365763	DNA-directed RNA polymerases I, II, and III subunit RPABC1 [Source:UniProtKB/Swiss-Prot;Acc:Q9N5K2]
WBGene00020760	T24C4.4	698.367	1.2834	0.607834	2.11144	0.0347348	0.365763
WBGene00044645	Y51H7BR.8	12.182	1.57879	0.74783	2.11116	0.034759	0.365763
WBGene00077685	C04F12.12	13.0825	2.65781	1.25926	2.11062	0.0348047	0.365763
WBGene00012755	Y41C4A.8	425.44	1.1123	0.527286	2.10949	0.0349022	0.365816
WBGene00018765	mpc-2	2308.95	0.94679	0.448727	2.10995	0.0348631	0.365816	Probable mitochondrial pyruvate carrier 2 [Source:UniProtKB/Swiss-Prot;Acc:O01578]
WBGene00045098	VY10G11R.3	2.87585	2.0607	0.976834	2.10957	0.0348952	0.365816
WBGene00007201	exos-4.1	1722.67	0.71632	0.339738	2.10845	0.0349922	0.366141	Putative exosome complex component RRP41 [Source:UniProtKB/Swiss-Prot;Acc:Q17533]
WBGene00008342	frpr-5	77.6023	-0.686935	0.325768	-2.10866	0.0349736	0.366141	FMRFamide Peptide Receptor family [Source:UniProtKB/TrEMBL;Acc:K8F7R9]
WBGene00020160	igcm-3	3983.31	-0.610686	0.289626	-2.10853	0.0349848	0.366141	ImmunoGlobulin-like Cell adhesion Molecule family [Source:UniProtKB/TrEMBL;Acc:Q22096]
WBGene00016262	C30F12.3	106.684	0.644872	0.305944	2.10781	0.0350473	0.366176
WBGene00019767	rpa-2	10272.5	0.517669	0.24557	2.10803	0.0350284	0.366176	Replication Protein A homolog [Source:UniProtKB/TrEMBL;Acc:Q95Y97]
WBGene00077539	Y52B11A.12	46.3546	0.973499	0.461871	2.10773	0.0350544	0.366176
WBGene00000037	ace-3	125.637	-0.604709	0.287037	-2.10673	0.0351413	0.366786	Carboxylic ester hydrolase [Source:UniProtKB/TrEMBL;Acc:Q9U295]
WBGene00003093	lys-4	4260.68	1.72066	0.817558	2.10464	0.035323	0.366786	LYSozyme [Source:UniProtKB/TrEMBL;Acc:Q20964]
WBGene00003703	nhr-113	52.8701	-1.06501	0.505616	-2.10636	0.0351732	0.366786	Nuclear Hormone Receptor family [Source:UniProtKB/TrEMBL;Acc:Q9XXL8]
WBGene00004434	rpl-22	40412.1	1.15176	0.547326	2.10434	0.0353488	0.366786	60S ribosomal protein L22 [Source:UniProtKB/Swiss-Prot;Acc:P52819]
WBGene00010784	twk-48	91.9868	-0.792942	0.376713	-2.1049	0.0353001	0.366786	TWiK family of potassium channels [Source:UniProtKB/TrEMBL;Acc:Q7YWY7]
WBGene00011072	tag-209	1032.16	1.41899	0.674074	2.10509	0.0352836	0.366786	Putative protein tag-209 [Source:UniProtKB/Swiss-Prot;Acc:Q09418]
WBGene00012374	W09H1.4	34.0583	1.15383	0.548092	2.10518	0.0352754	0.366786
WBGene00013567	Y75B12B.1	4140.92	0.796378	0.378422	2.10447	0.0353375	0.366786
WBGene00013741	Y111B2A.21	141.841	0.876929	0.416586	2.10504	0.0352882	0.366786
WBGene00016114	flp-27	506.779	1.00659	0.478307	2.10449	0.0353359	0.366786	FMRFamide-like neuropeptides 27 EASAFGDIIGELKGKGLGGRMRF-amide [Source:UniProtKB/Swiss-Prot;Acc:Q18184]
WBGene00016571	C41H7.1	180.85	0.910674	0.432341	2.10638	0.0351713	0.366786
WBGene00016751	C48E7.6	98.8596	-0.727576	0.345617	-2.10515	0.0352782	0.366786
WBGene00012091	pals-29	20.5051	-1.69306	0.804686	-2.104	0.035378	0.366795	Protein containing ALS2cr12 (ALS2CR12) domain [Source:UniProtKB/TrEMBL;Acc:O45859]
WBGene00016614	trpp-12	415.364	-0.678772	0.322629	-2.10388	0.0353891	0.366795	TRansport Protein Particle [Source:UniProtKB/TrEMBL;Acc:Q5WRR4]
WBGene00010727	K09G1.1	3277.1	-0.458981	0.218186	-2.10362	0.0354112	0.366821
WBGene00000731	col-158	1104.25	1.97045	0.93875	2.09901	0.0358157	0.367147	COLlagen [Source:UniProtKB/TrEMBL;Acc:O17734]
WBGene00001755	gst-7	7041.71	0.732357	0.348849	2.09935	0.0357857	0.367147	Probable glutathione S-transferase 7 [Source:UniProtKB/Swiss-Prot;Acc:P91253]
WBGene00002261	ldb-1	1353.64	-0.613228	0.292152	-2.099	0.0358168	0.367147	F58A3.1a; LIM Domain Binding protein [Source:UniProtKB/TrEMBL;Acc:G5EEL0]
WBGene00004854	slt-1	226.618	-0.997693	0.475061	-2.10014	0.0357166	0.367147	Slit homolog 1 protein [Source:UniProtKB/Swiss-Prot;Acc:G5EFX6]
WBGene00007019	mdt-19	2666.42	0.639283	0.304548	2.09912	0.0358065	0.367147	Mediator of RNA polymerase II transcription subunit 19 [Source:UniProtKB/Swiss-Prot;Acc:Q9N4F2]
WBGene00007932	zip-5	334.588	-0.850115	0.404719	-2.10051	0.0356842	0.367147	BZIP transcription factor family [Source:UniProtKB/TrEMBL;Acc:B1V8I9]
WBGene00010669	bath-37	24.9926	1.04391	0.497108	2.09996	0.035732	0.367147	BTB and MATH domain containing [Source:UniProtKB/TrEMBL;Acc:M1ZJY8]
WBGene00010963	nduo-4	10125.8	1.00442	0.477717	2.10253	0.0355065	0.367147	NADH-ubiquinone oxidoreductase chain 4 [Source:UniProtKB/Swiss-Prot;Acc:P24892]
WBGene00011904	hlb-1	1331.51	-0.50157	0.238658	-2.10162	0.0355862	0.367147	Liprin-beta [Source:UniProtKB/Swiss-Prot;Acc:Q94071]
WBGene00013306	Y57G11C.8	176.345	0.57543	0.273902	2.10086	0.0356531	0.367147
WBGene00016281	pals-32	34.883	-1.49849	0.713901	-2.09902	0.0358151	0.367147	Protein containing ALS2cr12 (ALS2CR12) domain [Source:UniProtKB/TrEMBL;Acc:O16898]
WBGene00016829	sre-54	76.489	1.70302	0.810632	2.10086	0.0356533	0.367147	Serpentine Receptor, class E (Epsilon) [Source:UniProtKB/TrEMBL;Acc:A3QMA4]
WBGene00020662	T21H3.1	40599.7	1.13955	0.542502	2.10054	0.0356816	0.367147
WBGene00020913	W01B11.1	10.8836	2.05632	0.978051	2.10247	0.0355123	0.367147
WBGene00022036	Y65B4BL.4	1818.51	0.597515	0.28433	2.10149	0.0355983	0.367147
WBGene00044153	W04G3.11	16.9653	1.10972	0.527902	2.10214	0.035541	0.367147
WBGene00044707	F22G12.7	5.83346	-1.47946	0.704007	-2.10148	0.035599	0.367147
WBGene00219687	linc-12	8.48503	1.44694	0.688734	2.10086	0.0356529	0.367147	NA
WBGene00255375	F08B4.8	102.409	3.3174	1.5794	2.10042	0.0356923	0.367147
WBGene00003784	nos-2	1440.68	0.721051	0.343623	2.09838	0.0358719	0.367307	NanOS related [Source:UniProtKB/TrEMBL;Acc:Q23406]
WBGene00014226	ZK1098.11	644.063	0.563724	0.268642	2.09842	0.0358683	0.367307
WBGene00010408	mboa-2	2407.25	0.436754	0.208225	2.09751	0.0359484	0.367889	O-acyltransferase [Source:UniProtKB/TrEMBL;Acc:Q9NCE1]
WBGene00000976	dhs-13	5350.98	0.694439	0.33156	2.09446	0.0362192	0.368034	DeHydrogenases, Short chain [Source:UniProtKB/TrEMBL;Acc:O16619]
WBGene00006709	ubc-14	2284.08	0.993577	0.473884	2.09667	0.0360231	0.368034	UBiquitin Conjugating enzyme [Source:UniProtKB/TrEMBL;Acc:Q9U1Q1]
WBGene00007239	C01G10.14	5.72183	-2.60913	1.24571	-2.09449	0.0362161	0.368034	Major sperm protein [Source:UniProtKB/TrEMBL;Acc:Q93173]
WBGene00007657	pals-3	17.4837	-1.46476	0.699247	-2.09477	0.0361918	0.368034	Protein containing ALS2cr12 (ALS2CR12) domain [Source:UniProtKB/TrEMBL;Acc:O45255]
WBGene00007901	C33D9.8	80.3174	-0.878702	0.419201	-2.09614	0.0360699	0.368034
WBGene00009304	eva-1	322.436	-0.598341	0.28544	-2.09621	0.0360637	0.368034	Enhancer of unc-40 Ventral Axon guidance defects [Source:UniProtKB/TrEMBL;Acc:A0A131MCP4]
WBGene00011424	dhs-31	97.7521	0.538089	0.256646	2.09662	0.0360274	0.368034	DeHydrogenases, Short chain [Source:UniProtKB/TrEMBL;Acc:D3KFT5]
WBGene00013547	Y75B8A.10	28.6814	1.43467	0.684969	2.0945	0.0362157	0.368034
WBGene00013886	ZC412.5	39.2274	2.26875	1.08319	2.0945	0.036215	0.368034
WBGene00017952	F31E3.6	60.6455	0.86941	0.415041	2.09476	0.0361926	0.368034
WBGene00018489	F46E10.2	2921.73	1.37803	0.657356	2.09633	0.0360533	0.368034	5H1 [Source:UniProtKB/TrEMBL;Acc:G5EDS0]
WBGene00021600	Y46H3A.4	45.829	1.47098	0.702106	2.0951	0.0361618	0.368034
WBGene00022157	Y71G12B.22	13.4254	2.3797	1.13561	2.09553	0.0361239	0.368034
WBGene00003925	pas-4	9701.68	0.464331	0.221734	2.09409	0.0362522	0.368039	Proteasome subunit alpha type-7 [Source:UniProtKB/Swiss-Prot;Acc:Q95005]
WBGene00016728	C46H11.2	376.704	-0.746959	0.356712	-2.09401	0.0362591	0.368039	Flavin-containing monooxygenase [Source:UniProtKB/TrEMBL;Acc:Q9GYJ1]
WBGene00002094	ins-11	60.121	1.16545	0.557269	2.09136	0.0364962	0.368263	Probable insulin-like peptide gamma-type 1 B-chain-like peptide A-chain-like peptide [Source:UniProtKB/Swiss-Prot;Acc:Q18060]
WBGene00004134	myrf-1	1023.43	-0.650082	0.311001	-2.09029	0.036592	0.368263	Myelin regulatory factor related [Source:UniProtKB/TrEMBL;Acc:G5EFI7]
WBGene00004482	rps-13	41675.1	1.09772	0.525389	2.08935	0.0366762	0.368263	40S ribosomal protein S13 [Source:UniProtKB/Swiss-Prot;Acc:P51404]
WBGene00004971	spe-17	48.6342	3.74982	1.79303	2.09133	0.0364986	0.368263	Spermatogenesis-defective protein spe-17 [Source:UniProtKB/Swiss-Prot;Acc:P34890]
WBGene00007163	fbxa-154	39.5523	-1.19971	0.573443	-2.09211	0.0364283	0.368263	F-box A protein [Source:UniProtKB/TrEMBL;Acc:Q86D19]
WBGene00007709	clec-87	29411.9	0.757555	0.362417	2.09029	0.0365919	0.368263	C-type lectin domain-containing protein 87 [Source:UniProtKB/Swiss-Prot;Acc:Q9XVS3]
WBGene00008237	nstp-10	3194.48	0.468507	0.224177	2.0899	0.0366272	0.368263	GDP-fucose transporter [Source:UniProtKB/Swiss-Prot;Acc:Q968A5]
WBGene00009390	F35C5.1	38.8681	1.47182	0.704031	2.09056	0.0365671	0.368263
WBGene00010793	LLC1.2	8527.34	1.01805	0.48701	2.09041	0.0365814	0.368263
WBGene00011134	ssp-33	30.4964	3.99268	1.90969	2.09075	0.0365505	0.368263	Sperm Specific family, class P [Source:UniProtKB/TrEMBL;Acc:Q9U393]
WBGene00013419	Y65A5A.2	1643.7	0.971866	0.464957	2.09023	0.0365975	0.368263
WBGene00015487	mrps-17	1485.78	0.739949	0.353993	2.09029	0.0365913	0.368263	28S ribosomal protein S17, mitochondrial [Source:UniProtKB/Swiss-Prot;Acc:Q11189]
WBGene00015858	C16D9.3	8.83959	1.38016	0.65984	2.09166	0.0364687	0.368263
WBGene00017247	F08D12.3	1231.62	0.939794	0.449489	2.0908	0.0365456	0.368263
WBGene00019237	H24G06.1	936.097	-0.820115	0.392484	-2.08955	0.0366584	0.368263
WBGene00020659	T21G5.1	23.8741	-1.51113	0.72232	-2.09206	0.0364334	0.368263	Tyrosine-protein kinase [Source:UniProtKB/TrEMBL;Acc:O02064]
WBGene00044324	ufm-1	2921.61	0.936844	0.44839	2.08935	0.0366761	0.368263	Ubiquitin-fold modifier 1 [Source:UniProtKB/Swiss-Prot;Acc:P34661]
WBGene00045252	Y62H9A.15	158.726	0.717117	0.342664	2.09277	0.0363699	0.368263
WBGene00219207	C01F6.14	103.332	1.36218	0.651336	2.09137	0.0364952	0.368263
WBGene00219279	T24D5.11	17.5691	-1.33559	0.638207	-2.09272	0.0363738	0.368263
WBGene00003462	msp-74	6.75575	3.3064	1.58282	2.08893	0.0367137	0.368441	Major Sperm Protein [Source:UniProtKB/TrEMBL;Acc:G5EEW3]
WBGene00015455	C04G6.5	103.198	1.45802	0.69807	2.08864	0.0367405	0.368485	UPF0057 membrane protein C04G6.5 [Source:UniProtKB/Swiss-Prot;Acc:Q17638]
WBGene00019830	hrg-1	1102.35	1.12223	0.53735	2.08845	0.0367576	0.368485	Heme transporter hrg-1 [Source:UniProtKB/Swiss-Prot;Acc:Q21642]
WBGene00016437	C35B1.8	19.2343	1.91188	0.915584	2.08816	0.0367838	0.368549
WBGene00003463	msp-76	199.125	3.62586	1.7373	2.08707	0.0368821	0.368883	Major sperm protein 10/36/56/76 [Source:UniProtKB/Swiss-Prot;Acc:P05634]
WBGene00007389	glb-3	50.6506	-0.90517	0.433629	-2.08743	0.0368495	0.368883	GLoBin related [Source:UniProtKB/TrEMBL;Acc:B6EU62]
WBGene00008440	DY3.8	3216.04	0.720955	0.345574	2.08625	0.0369555	0.368883
WBGene00009800	rrc-1	192.245	-0.684083	0.327878	-2.08639	0.0369432	0.368883	GTPase-activating protein rrc-1 [Source:UniProtKB/Swiss-Prot;Acc:Q20498]
WBGene00012383	ttr-17	1346.77	0.553723	0.265307	2.08711	0.0368786	0.368883	TransThyretin-Related family domain [Source:UniProtKB/TrEMBL;Acc:Q9XWL1]
WBGene00013366	Y60A3A.21	734.336	0.837245	0.40129	2.08638	0.036944	0.368883
WBGene00019544	miro-1	2238.43	0.413866	0.198346	2.08659	0.0369255	0.368883	Mitochondrial Rho GTPase 1 [Source:UniProtKB/Swiss-Prot;Acc:Q94263]
WBGene00008860	romo-1	1932.64	1.19694	0.574112	2.08485	0.0370833	0.36996	(Reactive Oxygen species MOdulator) homolog [Source:UniProtKB/TrEMBL;Acc:Q93511]
WBGene00012659	Y39A1A.22	1271.68	0.909442	0.436262	2.08462	0.0371036	0.369964
WBGene00007741	glb-8	81.223	-0.901963	0.432912	-2.08348	0.0372076	0.370606	GLoBin related; Globin [Source:UniProtKB/TrEMBL;Acc:G5EBR4]
WBGene00012903	vps-2	5591.38	0.749331	0.359632	2.0836	0.0371963	0.370606	Related to yeast Vacuolar Protein Sorting factor [Source:UniProtKB/TrEMBL;Acc:Q9U2F6]
WBGene00010338	F59F4.3	569.704	-0.34812	0.167159	-2.08257	0.0372908	0.371114
WBGene00016599	C42D8.1	846.218	0.854168	0.410211	2.08226	0.0373184	0.371114
WBGene00019726	bris-1	2544.97	0.549052	0.263665	2.08238	0.0373073	0.371114	BRag/Iqsec/Schizo related Arf GEF family member [Source:UniProtKB/TrEMBL;Acc:U4PLL0]
WBGene00004048	plx-2	332.109	-0.564408	0.271106	-2.08187	0.037354	0.371135	Plexin-2 [Source:UniProtKB/Swiss-Prot;Acc:O45657]
WBGene00020021	R12B2.7	8.12478	1.53589	0.737767	2.08181	0.0373603	0.371135
WBGene00000443	ceh-20	1528.83	-0.601221	0.28935	-2.07783	0.0377246	0.371496	Homeobox protein ceh-20 [Source:UniProtKB/Swiss-Prot;Acc:P41779]
WBGene00001728	grl-19	43.9852	3.27693	1.57648	2.07863	0.0376509	0.371496	GRound-Like (Grd related) [Source:UniProtKB/TrEMBL;Acc:O44504]
WBGene00004450	rpl-36	52478.5	1.05586	0.508032	2.07833	0.037679	0.371496	60S ribosomal protein L36 [Source:UniProtKB/Swiss-Prot;Acc:P49181]
WBGene00009336	F32D8.14	1864.11	0.389932	0.187725	2.07715	0.037788	0.371496
WBGene00009497	F36H1.12	6.35217	1.99854	0.961607	2.07834	0.0376784	0.371496
WBGene00010064	F54F7.2	859.14	1.15871	0.557205	2.07951	0.0375702	0.371496
WBGene00011495	T05F1.11	264.201	-0.846439	0.407372	-2.0778	0.0377274	0.371496
WBGene00013967	ZK287.7	907.325	0.491045	0.236376	2.07739	0.0377657	0.371496
WBGene00015102	cpg-2	92173.9	0.818508	0.394069	2.07707	0.0377951	0.371496	Chondroitin proteoglycan-2 [Source:UniProtKB/Swiss-Prot;Acc:P41996]
WBGene00017133	EEED8.2	793.724	-0.881937	0.424253	-2.0788	0.0376356	0.371496
WBGene00019498	K07E8.7	971.857	0.634203	0.305125	2.0785	0.0376633	0.371496	Pseudouridine synthase [Source:UniProtKB/TrEMBL;Acc:A0A0M7RF85]
WBGene00020277	T06A1.1	15.5575	-1.3068	0.628754	-2.0784	0.0376723	0.371496
WBGene00021400	Y38C1AA.9	124.849	-0.72762	0.35023	-2.07755	0.0377508	0.371496
WBGene00022074	Y69A2AR.1	4647.04	0.579376	0.278659	2.07916	0.0376028	0.371496
WBGene00022662	ZK112.6	6.0579	-2.04427	0.983577	-2.07841	0.0376718	0.371496
WBGene00043147	nspd-6	40.2243	3.69427	1.7782	2.07754	0.0377519	0.371496	Nematode Specific Peptide family, group D [Source:UniProtKB/TrEMBL;Acc:G5EG23]
WBGene00044218	F23H12.10	57.0378	0.712975	0.343008	2.07859	0.0376548	0.371496
WBGene00045483	oxy-5	2673.31	0.722416	0.347167	2.08089	0.0374443	0.371496
WBGene00050903	Y17D7C.4	268.139	1.08403	0.521077	2.08037	0.0374917	0.371496
WBGene00077543	F27D4.8	584.898	0.851874	0.409333	2.08113	0.0374221	0.371496
WBGene00004432	rpl-20	43214.7	0.698333	0.336353	2.07619	0.0378764	0.371717	60S ribosomal protein L18a [Source:UniProtKB/Swiss-Prot;Acc:O44480]
WBGene00012582	clec-8	235.489	0.631865	0.304404	2.07575	0.0379173	0.371717	C-type LECtin [Source:UniProtKB/TrEMBL;Acc:Q9NAK6]
WBGene00013073	hmit-1.1	491.467	1.01389	0.488402	2.07594	0.0378995	0.371717	H(+) MyoInositol coTransporter [Source:UniProtKB/TrEMBL;Acc:Q9XXR3]
WBGene00015450	C04F5.8	2522.88	0.43288	0.208481	2.07635	0.0378618	0.371717
WBGene00077770	M04D5.3	948.907	0.860615	0.414523	2.07616	0.0378794	0.371717
WBGene00018164	sup-36	4498.73	0.645213	0.310928	2.07512	0.0379756	0.371963	SUPpressor [Source:UniProtKB/TrEMBL;Acc:Q94207]
WBGene00020329	bath-26	205.669	-0.470468	0.226727	-2.07505	0.0379823	0.371963	BTB and MATH domain containing [Source:UniProtKB/TrEMBL;Acc:O76611]
WBGene00001669	gpa-7	204.337	-0.680494	0.328004	-2.07465	0.0380192	0.372129	Guanine nucleotide-binding protein alpha-7 subunit [Source:UniProtKB/Swiss-Prot;Acc:Q21917]
WBGene00016544	math-18	63.6656	-0.827259	0.398899	-2.07385	0.0380929	0.372459	MATH (Meprin-associated Traf homology) domain containing [Source:UniProtKB/TrEMBL;Acc:Q9TZA4]
WBGene00020509	hex-1	6746.36	1.15867	0.558682	2.07394	0.0380846	0.372459	Beta-hexosaminidase A [Source:UniProtKB/Swiss-Prot;Acc:Q22492]
WBGene00001787	gst-39	517.233	0.972992	0.469271	2.07341	0.038134	0.372666	Glutathione S-Transferase [Source:UniProtKB/TrEMBL;Acc:Q9NAB0]
WBGene00000776	cpl-1	41469.7	0.718751	0.346816	2.07243	0.0382258	0.372673	CathePsin L family [Source:UniProtKB/TrEMBL;Acc:O45734]
WBGene00001396	fat-4	7518.17	0.414947	0.200168	2.07299	0.0381735	0.372673	Delta(5) fatty acid desaturase fat-4 [Source:UniProtKB/Swiss-Prot;Acc:G5EG11]
WBGene00001747	gsp-1	10598.5	0.384146	0.185318	2.0729	0.0381815	0.372673	Serine/threonine-protein phosphatase PP1-alpha [Source:UniProtKB/Swiss-Prot;Acc:Q27497]
WBGene00010053	F54D5.9	3190.52	0.667498	0.3221	2.07233	0.0382347	0.372673
WBGene00016108	C25G6.3	26.6675	-1.25599	0.605987	-2.07263	0.0382071	0.372673
WBGene00044478	K06B9.6	12.5297	1.38971	0.670732	2.07193	0.0382724	0.372846
WBGene00000843	cup-2	3896.36	0.435134	0.210055	2.07152	0.0383099	0.372943	Derlin-1 [Source:UniProtKB/Swiss-Prot;Acc:Q93561]
WBGene00045392	pals-35	198.825	0.750126	0.362136	2.07139	0.0383223	0.372943	Protein containing ALS2cr12 (ALS2CR12) domain [Source:UniProtKB/TrEMBL;Acc:A5A8R5]
WBGene00013588	nlp-42	378.325	1.19825	0.578588	2.07099	0.03836	0.373115	Neuropeptide-Like Protein [Source:UniProtKB/TrEMBL;Acc:Q95ZI9]
WBGene00006746	unc-6	468.109	-0.556906	0.268983	-2.07041	0.0384139	0.373307	Netrin unc-6 [Source:UniProtKB/Swiss-Prot;Acc:P34710]
WBGene00008232	C50F4.4	356.177	0.559775	0.270562	2.06893	0.0385522	0.373307
WBGene00008727	F13A7.12	49.7774	-0.986779	0.476903	-2.06914	0.038533	0.373307
WBGene00009537	ccch-2	118.637	0.963233	0.465512	2.06919	0.0385282	0.373307	CCCH-type zinc finger putative transcription factor [Source:UniProtKB/TrEMBL;Acc:O45491]
WBGene00014914	Y52B11A.11	19.7724	0.966663	0.467278	2.06871	0.0385733	0.373307
WBGene00015618	C08G5.6	41.7964	1.12367	0.543175	2.06871	0.0385729	0.373307
WBGene00017695	fip-1	16.1422	1.64764	0.795904	2.07015	0.0384379	0.373307	Fungus-induced protein 1 [Source:UniProtKB/Swiss-Prot;Acc:P34407]
WBGene00022760	ZK546.3	21.0044	2.17324	1.05012	2.06951	0.0384985	0.373307
WBGene00023419	F53F4.16	766.104	1.00904	0.487449	2.07004	0.0384489	0.373307
WBGene00194836	C25H3.18	192.004	1.23747	0.598207	2.06864	0.03858	0.373307
WBGene00021692	Y48G8AL.15	253.732	0.810858	0.392025	2.06838	0.038604	0.373346
WBGene00018965	F56D2.3	403.111	-0.978962	0.473416	-2.06787	0.0386527	0.373429
WBGene00022653	ZK105.1	5089.82	0.965286	0.46679	2.06792	0.0386473	0.373429
WBGene00006130	str-68	13.4323	1.9281	0.932763	2.06709	0.0387258	0.373508	Seven TM Receptor [Source:UniProtKB/TrEMBL;Acc:A0A0S4XRX5]
WBGene00007372	C06B8.7	651.376	-0.49246	0.238257	-2.06693	0.038741	0.373508
WBGene00022450	ubc-26	664.771	0.682577	0.330202	2.06715	0.0387199	0.373508	UBiquitin Conjugating enzyme [Source:UniProtKB/TrEMBL;Acc:Q86S73]
WBGene00194864	Y66A7A.9	10.8213	2.47348	1.19661	2.06707	0.038728	0.373508
WBGene00018846	eef-1B.1	34024.4	1.03492	0.500779	2.06663	0.0387694	0.373589	Probable elongation factor 1-beta/1-delta 1 [Source:UniProtKB/Swiss-Prot;Acc:P34460]
WBGene00019200	H14E04.3	203.5	0.907081	0.438989	2.06629	0.0388007	0.373697
WBGene00010118	F55F3.4	20.0442	-1.24805	0.604276	-2.06536	0.0388886	0.374158
WBGene00044149	T24D5.6	27.7325	-1.05617	0.511323	-2.06557	0.0388695	0.374158
WBGene00019615	K10B4.3	602.272	-0.665048	0.322063	-2.06497	0.0389262	0.374326	Protein melted homolog [Source:UniProtKB/Swiss-Prot;Acc:O17237]
WBGene00004302	ran-1	32656.9	0.570006	0.276084	2.06461	0.0389599	0.374385	GTP-binding nuclear protein ran-1 [Source:UniProtKB/Swiss-Prot;Acc:O17915]
WBGene00004320	rbx-1	8114.92	0.842357	0.408194	2.06362	0.039054	0.374385	RING-box protein 1 [Source:UniProtKB/Swiss-Prot;Acc:Q23457]
WBGene00005979	srx-88	2.81889	2.92965	1.41942	2.06397	0.0390202	0.374385	Serpentine Receptor, class X [Source:UniProtKB/TrEMBL;Acc:Q20355]
WBGene00006424	ctbp-1	252.478	-0.722405	0.350114	-2.06334	0.0390805	0.374385	C-terminal-binding protein 1 [Source:UniProtKB/Swiss-Prot;Acc:Q20595]
WBGene00008694	F11C1.5	1433.37	-0.581494	0.281758	-2.0638	0.0390363	0.374385
WBGene00016825	C50E10.1	60.8335	2.35729	1.14223	2.06376	0.0390403	0.374385
WBGene00021470	tpxl-1	6621.22	0.667227	0.32323	2.06425	0.0389942	0.374385	TPX2 (Targeting Protein for Xenopus Klp2)-Like; TPX2-related alternative variant b [Source:UniProtKB/TrEMBL;Acc:Q8WSN6]
WBGene00022373	mrpl-15	2375.13	0.631441	0.306048	2.06321	0.039093	0.374385	Mitochondrial Ribosomal Protein, Large [Source:UniProtKB/TrEMBL;Acc:Q9BPN6]
WBGene00007331	pho-11	7984.24	0.5968	0.28931	2.06284	0.0391281	0.374529	Putative acid phosphatase 11 [Source:UniProtKB/Swiss-Prot;Acc:Q09451]
WBGene00021548	trx-4	1644.84	0.852868	0.413572	2.0622	0.0391889	0.374919	Thioredoxin [Source:UniProtKB/TrEMBL;Acc:Q9TXY8]
WBGene00007690	sftd-3	1053.36	0.480294	0.233019	2.06118	0.0392856	0.375241	Vesicle transport protein [Source:UniProtKB/TrEMBL;Acc:G5EDD5]
WBGene00012134	T28F3.8	789.505	0.483744	0.234671	2.06137	0.0392674	0.375241
WBGene00015912	fbxc-50	1691.52	0.687913	0.333777	2.061	0.0393031	0.375241	F-box C protein [Source:UniProtKB/TrEMBL;Acc:O16541]
WBGene00017673	icmt-1	116.43	1.88948	0.91668	2.06122	0.0392817	0.375241	Protein-S-isoprenylcysteine O-methyltransferase [Source:UniProtKB/TrEMBL;Acc:P91266]
WBGene00013829	Y116F11B.14	6.77516	1.44347	0.70051	2.0606	0.0393413	0.375414
WBGene00007707	fath-1	3558.44	0.497856	0.24173	2.05955	0.0394412	0.376174	Fatty acid 2-hydroxylase [Source:UniProtKB/TrEMBL;Acc:Q9XVS0]
WBGene00003082	lsm-8	2828.69	0.626617	0.304358	2.05881	0.0395122	0.376659	LSM Sm-like protein [Source:UniProtKB/TrEMBL;Acc:Q95XD4]
WBGene00044660	fbxa-87	48.4104	-0.735417	0.357251	-2.05854	0.0395379	0.376711
WBGene00011996	T24F1.4	78.6268	0.850757	0.413351	2.0582	0.0395714	0.376838
WBGene00004448	rpl-34	35737.5	0.930028	0.45209	2.05718	0.0396693	0.377578	Ribosomal Protein, Large subunit [Source:UniProtKB/TrEMBL;Acc:A3QMC5]
WBGene00003673	nhr-83	44.4566	-0.669981	0.325876	-2.05594	0.0397887	0.37815
WBGene00004492	rps-23	99470.1	1.00087	0.486825	2.05592	0.0397903	0.37815	40S ribosomal protein S23 [Source:UniProtKB/Swiss-Prot;Acc:Q19877]
WBGene00022283	lgc-27	406.852	-0.952253	0.463153	-2.05602	0.0397805	0.37815	Ligand-Gated ion Channel [Source:UniProtKB/TrEMBL;Acc:Q8TA50]
WBGene00010633	nspd-2	251.694	3.67252	1.78675	2.05542	0.0398386	0.378223	Nematode Specific Peptide family, group D [Source:UniProtKB/TrEMBL;Acc:Q21293]
WBGene00020458	fbxa-70	29.3105	0.81348	0.395768	2.05545	0.0398357	0.378223
WBGene00006039	ssp-10	157.762	1.92542	0.937023	2.05483	0.0398956	0.378571	Sperm-specific class P protein 10 [Source:UniProtKB/Swiss-Prot;Acc:Q21289]
WBGene00007775	acd-3	57.4872	-0.740597	0.360559	-2.05402	0.0399735	0.378925
WBGene00021354	fpn-1.1	664.248	0.420558	0.204739	2.05412	0.0399645	0.378925	FerroPortiN [Source:UniProtKB/TrEMBL;Acc:Q8IA95]
WBGene00012658	Y39A1A.21	969.084	0.975999	0.475213	2.05381	0.0399938	0.378925
WBGene00001601	glh-4	1047.64	0.724978	0.353229	2.05243	0.0401276	0.379325	ATP-dependent RNA helicase glh-4 [Source:UniProtKB/Swiss-Prot;Acc:O76743]
WBGene00011001	R04B5.1	7.55098	2.80654	1.36695	2.05315	0.0400585	0.379325
WBGene00015098	snpc-3.1	113.047	0.860836	0.419329	2.05289	0.0400833	0.379325	SNAPc (Small Nuclear RNA Activating Complex) homolog [Source:UniProtKB/TrEMBL;Acc:O44168]
WBGene00016011	C23G10.2	4169.89	0.971305	0.473255	2.05239	0.0401314	0.379325	RutC family protein C23G10.2 [Source:UniProtKB/Swiss-Prot;Acc:Q10121]
WBGene00022253	hrpf-2	5353.9	0.512833	0.249879	2.05233	0.0401378	0.379325	HnRNP F homolog [Source:UniProtKB/TrEMBL;Acc:V6CLR1]
WBGene00000908	daf-12	782.74	-0.671678	0.327468	-2.05112	0.0402551	0.379429	Nuclear hormone receptor family member daf-12 [Source:UniProtKB/Swiss-Prot;Acc:G5EFF5]
WBGene00001792	gst-44	61.1492	0.644294	0.314449	2.04896	0.0404658	0.379429	Glutathione S-Transferase [Source:UniProtKB/TrEMBL;Acc:O45352]
WBGene00003450	msp-57	93.8774	3.69873	1.80391	2.0504	0.0403258	0.379429	Major sperm protein 55/57 [Source:UniProtKB/Swiss-Prot;Acc:Q17856]
WBGene00004235	ptr-21	2136.59	0.657317	0.320737	2.0494	0.0404235	0.379429	PaTched Related family [Source:UniProtKB/TrEMBL;Acc:Q9N2Z6]
WBGene00004415	rpl-4	157294	0.747258	0.364221	2.05166	0.0402026	0.379429	60S ribosomal protein L4 [Source:UniProtKB/Swiss-Prot;Acc:O02056]
WBGene00011805	T16G12.4	1694.34	0.510555	0.249019	2.05026	0.0403389	0.379429
WBGene00012480	clec-104	21.9751	0.993985	0.485137	2.04887	0.0404744	0.379429	C-type LECtin [Source:UniProtKB/TrEMBL;Acc:Q9XW21]
WBGene00012968	Y48A6B.7	1096.92	1.08293	0.527845	2.05161	0.040208	0.379429
WBGene00013742	sas-1	1379.76	0.682394	0.332804	2.05044	0.0403215	0.379429
WBGene00015948	C18A11.2	89.4289	1.53813	0.750122	2.0505	0.0403152	0.379429
WBGene00016573	C41H7.3	1819.49	0.666501	0.325232	2.04931	0.0404315	0.379429
WBGene00017080	lec-12	3246.45	0.719997	0.351229	2.04993	0.0403708	0.379429	Galectin [Source:UniProtKB/TrEMBL;Acc:Q5ZR27]
WBGene00018537	F47B7.6	13.7061	1.51175	0.737214	2.05063	0.0403033	0.379429
WBGene00019227	sgca-1	227.909	-0.677438	0.330216	-2.0515	0.0402184	0.379429	SarcoGlyCan Alpha homolog [Source:UniProtKB/TrEMBL;Acc:H2L0C3]
WBGene00021561	Y45G5AM.9	2065.47	0.584475	0.285236	2.04909	0.0404529	0.379429
WBGene00021780	scl-17	2.98843	2.91906	1.42458	2.04907	0.0404554	0.379429	SCP-Like extracellular protein [Source:UniProtKB/TrEMBL;Acc:Q9N3I3]
WBGene00005904	srx-13	29.2517	1.14392	0.558726	2.04736	0.0406224	0.380435	Serpentine Receptor, class X [Source:UniProtKB/TrEMBL;Acc:Q7KPX2]
WBGene00015769	C14C11.7	930.208	0.790181	0.385938	2.04743	0.0406159	0.380435
WBGene00002110	ins-27	445.434	1.28854	0.629461	2.04706	0.0406524	0.380444	INSulin related [Source:UniProtKB/TrEMBL;Acc:Q7JKM7]
WBGene00008227	C50B8.5	174.161	0.650792	0.317934	2.04694	0.0406642	0.380444
WBGene00011339	T01G5.1	105.399	-1.06884	0.522439	-2.04587	0.0407693	0.380909
WBGene00018724	F53A9.1	513.446	1.21711	0.594825	2.04616	0.0407404	0.380909
WBGene00019290	K02A2.5	47.3713	-0.734072	0.358822	-2.04578	0.0407779	0.380909
WBGene00194644	ZK795.6	5.06034	2.02553	0.99019	2.0456	0.0407956	0.380909
WBGene00002255	lbp-3	3149.34	0.391404	0.191516	2.04371	0.040982	0.381094	Fatty acid-binding protein homolog 3 [Source:UniProtKB/Swiss-Prot;Acc:Q20222]
WBGene00006520	tag-175	883.651	0.663493	0.324521	2.04453	0.0409009	0.381094	Transmembrane protein 41 homolog [Source:UniProtKB/Swiss-Prot;Acc:O62126]
[truncated: 44,571 more rows]

## Sheet: nsun-1 vs. control polysomes
wormbase_ID	gene_name	baseMean	log2FoldChange	lfcSE	stat	pvalue	padj	description
WBGene00000669	col-94	494.082	-7.48844	0.635225	-11.7887	4.46636e-32	1.13848e-27	COLlagen [Source:UniProtKB/TrEMBL;Acc:Q9U349]
WBGene00012550	hpo-21	896.792	-4.13199	0.355574	-11.6206	3.23844e-31	4.12739e-27	Probable signal peptidase complex subunit 2 [Source:UniProtKB/Swiss-Prot;Acc:Q9XWW1]
WBGene00009287	psf-2	112.877	-5.59534	0.569955	-9.81716	9.4981e-23	6.05267e-19	Probable DNA replication complex GINS protein PSF2 [Source:UniProtKB/Swiss-Prot;Acc:O62193]
WBGene00220163	Y47D3A.35	219.575	-2.58588	0.263378	-9.81814	9.40658e-23	6.05267e-19
WBGene00014108	ZK856.7	1006.72	-2.0525	0.237476	-8.64297	5.47722e-18	2.79229e-14
WBGene00010723	cpg-7	85.1828	-5.7942	0.687914	-8.42286	3.67405e-17	1.56086e-13	Chondroitin proteoglycan 7 [Source:UniProtKB/Swiss-Prot;Acc:Q7YWX9]
WBGene00015392	nspc-7	140.546	2.38434	0.294243	8.10331	5.34824e-16	1.94752e-12	Nematode Specific Peptide family, group C [Source:UniProtKB/TrEMBL;Acc:Q8WQG6]
WBGene00008357	nspc-16	274.427	1.69885	0.244633	6.94449	3.79842e-12	1.21027e-08	Nematode Specific Peptide family, group C [Source:UniProtKB/TrEMBL;Acc:G5ECP8]
WBGene00010538	ttr-3	53.4542	-2.79074	0.408073	-6.83883	7.98427e-12	2.26132e-08	Transthyretin-like protein 3 [Source:UniProtKB/Swiss-Prot;Acc:P34499]
WBGene00016590	C42C1.12	365.265	-2.17572	0.3262	-6.66989	2.55999e-11	6.5254e-08
WBGene00007459	C08F11.12	876.617	2.06337	0.328664	6.27807	3.42791e-10	7.9434e-07	UPF0375 protein C08F11.12 [Source:UniProtKB/Swiss-Prot;Acc:Q9U3R0]
WBGene00005000	spp-15	1036.18	-1.49312	0.25064	-5.95724	2.56534e-09	5.44921e-06	SaPosin-like Protein family [Source:UniProtKB/TrEMBL;Acc:Q9BIC4]
WBGene00023477	nspc-1	104.698	1.97511	0.34151	5.78347	7.3176e-09	1.33233e-05	Nematode Specific Peptide family, group C [Source:UniProtKB/TrEMBL;Acc:Q65ZI6]
WBGene00219838	C28H8.14	195.434	-2.29949	0.396857	-5.79425	6.86277e-09	1.33233e-05	NA
WBGene00206484	C31H2.14	15.7522	-4.11185	0.725335	-5.66889	1.43722e-08	2.44232e-05
WBGene00012878	Y45F10C.2	1165.74	1.93275	0.342807	5.63802	1.72018e-08	2.74046e-05	UPF0375 protein Y45F10C.2 [Source:UniProtKB/Swiss-Prot;Acc:O45941]
WBGene00023401		67.1113	-7.04129	1.25508	-5.61022	2.0207e-08	3.02986e-05
WBGene00009637	nspc-13	425.59	1.49993	0.276607	5.42261	5.87345e-08	8.31746e-05	Nematode Specific Peptide family, group C [Source:UniProtKB/TrEMBL;Acc:G5EF55]
WBGene00219886	F09E10.15	36.5838	-5.89862	1.09225	-5.40043	6.64823e-08	8.91913e-05	NA
WBGene00021838	Y54E10BL.3	19.6901	-4.04917	0.765289	-5.29103	1.21627e-07	0.000155014
WBGene00249815	F20D12.12	36.8526	-6.7776	1.30849	-5.17971	2.22227e-07	0.000269742
WBGene00194925	K08D8.11	17.8694	-4.47938	0.875115	-5.11861	3.0779e-07	0.000356616
WBGene00044340	nspc-5	14.3934	3.2662	0.639847	5.10466	3.31382e-07	0.000367257	Nematode Specific Peptide family, group C [Source:UniProtKB/TrEMBL;Acc:G5EDF2]
WBGene00022484	fbxa-77	13.4456	-6.18034	1.22071	-5.06293	4.12871e-07	0.000438504	F-box A protein [Source:UniProtKB/TrEMBL;Acc:Q95Y63]
WBGene00023263		26.1261	-5.39108	1.09575	-4.92	8.65452e-07	0.000874751
WBGene00167714	21ur-15004	8.93375	-6.87376	1.3988	-4.91403	8.92253e-07	0.000874751	NA
WBGene00008213	C49F8.1	136.157	-1.15432	0.235357	-4.90455	9.36437e-07	0.000884066
WBGene00220030	M03F4.13	13.8422	-5.52673	1.13638	-4.86347	1.15348e-06	0.00105008	NA
WBGene00009969	F53B7.7	13.6405	-3.54201	0.734845	-4.82008	1.43502e-06	0.00126133
WBGene00017909	F28H1.4	91.4246	-1.54268	0.324679	-4.75139	2.02024e-06	0.00171653
WBGene00007870	C32H11.7	23.0253	-3.59276	0.768379	-4.67577	2.92857e-06	0.00240804
WBGene00219908	F20C5.10	377.591	1.25886	0.275359	4.57172	4.83746e-06	0.00385334	NA
WBGene00194696	EEED8.18	18.3721	-2.60194	0.578194	-4.50012	6.79148e-06	0.00520285
WBGene00219816	C14E2.12	57.2931	-4.61589	1.02677	-4.49552	6.93986e-06	0.00520285	NA
WBGene00220004	K03E5.9	60.6197	-1.86648	0.417908	-4.46625	7.9601e-06	0.00579723	NA
WBGene00012145	nlp-46	26.0497	-2.40778	0.541946	-4.44284	8.87789e-06	0.00628604	Neuropeptide-Like Protein [Source:UniProtKB/TrEMBL;Acc:Q7YTJ1]
WBGene00220118	W03D8.13	90.4239	-1.74298	0.393674	-4.42747	9.5344e-06	0.00656843
WBGene00197517	R03G5.8	5.40504	-6.24104	1.4308	-4.36192	1.28925e-05	0.00864812	NA
WBGene00017197	F07C3.9	74.2664	-1.20831	0.277429	-4.35537	1.32843e-05	0.00868251
WBGene00011056	R06B9.5	451.756	-1.43964	0.332978	-4.32354	1.53546e-05	0.00978471
WBGene00219709	linc-37	39.6799	-2.35162	0.558475	-4.21079	2.54477e-05	0.015821	NA
WBGene00013345	Y59A8B.8	678.975	-0.880245	0.209737	-4.19689	2.70607e-05	0.0164233
WBGene00050906	F20E11.17	99.7199	-2.26704	0.540989	-4.19055	2.78281e-05	0.0164962
WBGene00012598	Y38E10A.20	27.6532	-2.00122	0.479641	-4.17232	3.01516e-05	0.0174674
WBGene00022864	ZK1236.5	381.346	-1.55585	0.378475	-4.11084	3.94227e-05	0.0223308
WBGene00011203	R10E4.7	103.184	1.71618	0.418858	4.09728	4.18037e-05	0.0231647
WBGene00194695	B0462.5	196.455	0.995514	0.243899	4.08166	4.47144e-05	0.0242504
WBGene00023458	M02E1.3	23.248	-3.14655	0.778785	-4.04034	5.33747e-05	0.0283442
WBGene00007271	C03C10.5	45.2332	-2.20756	0.547083	-4.03515	5.45684e-05	0.0283867
WBGene00219859	C49F5.11	27.9836	-3.55332	0.885833	-4.01128	6.03915e-05	0.0307876	NA
WBGene00012324	rhy-1	589.832	-1.05765	0.268732	-3.93569	8.29593e-05	0.0414634	Regulator of hypoxia-inducible factor 1 [Source:UniProtKB/Swiss-Prot;Acc:Q9XVW1]
WBGene00006929	vit-5	103536	1.84091	0.473306	3.88946	0.000100465	0.0492474	Vitellogenin-5 [Source:UniProtKB/Swiss-Prot;Acc:P06125]
WBGene00009640	nspc-10	1175.79	1.04453	0.269818	3.87125	0.000108277	0.0520753	Nematode Specific Peptide family, group C [Source:UniProtKB/TrEMBL;Acc:Q8I4J0]
WBGene00009935	F52E10.4	79.1895	-1.24635	0.328633	-3.79253	0.00014912	0.0699756
WBGene00018817	F54D12.4	258.726	1.16638	0.307797	3.78944	0.000150987	0.0699756
WBGene00077439	F55B12.10	28.0034	-1.67466	0.443238	-3.77823	0.000157947	0.0718943
WBGene00219984	F58D5.12	48.169	-1.79685	0.476486	-3.77104	0.000162569	0.0726997	NA
WBGene00044029	C05D12.7	42.5785	-1.72642	0.45996	-3.75343	0.000174433	0.0766605
WBGene00022063	Y67D8B.4	35.2257	-1.80351	0.483116	-3.73307	0.000189159	0.0817232
WBGene00008360	nspc-19	171.296	1.49516	0.405447	3.68768	0.000226309	0.0961437	Nematode Specific Peptide family, group C [Source:UniProtKB/TrEMBL;Acc:G5ECN6]
WBGene00008356	nspc-20	1017.96	1.26707	0.344723	3.67561	0.000237281	0.0977952	Nematode Specific Peptide family, group C [Source:UniProtKB/TrEMBL;Acc:G5ECP8]
WBGene00021073	nol-1	4631.38	-1.19681	0.325665	-3.67498	0.00023787	0.0977952	NucleOLar protein [Source:UniProtKB/TrEMBL;Acc:A0A0M7RDQ9]
WBGene00016904	C53D5.3	12.1851	-2.14171	0.594083	-3.60507	0.000312067	0.12429
WBGene00199315	T04C12.23	2.86104	-5.29644	1.46753	-3.60909	0.000307278	0.12429	NA
WBGene00011745	sre-4	188.774	1.28945	0.360613	3.57573	0.000349256	0.136962	Serpentine Receptor, class E (Epsilon) [Source:UniProtKB/TrEMBL;Acc:Q94048]
WBGene00219912	F22H10.10	58.0011	-2.93668	0.824711	-3.56085	0.000369649	0.142763	NA
WBGene00008038	C40H1.2	32.1785	1.60535	0.452737	3.54588	0.000391299	0.14668
WBGene00021040	W05G11.2	77.6443	-1.06027	0.298794	-3.5485	0.000387428	0.14668
WBGene00007240	C01G10.15	58.8905	-2.152	0.60859	-3.53605	0.000406157	0.148742
WBGene00045175	C10C6.9	101.454	-1.67796	0.47473	-3.53455	0.000408471	0.148742
WBGene00220228	Y111B2A.34	10.6204	-4.26458	1.21272	-3.51654	0.000437204	0.156962
WBGene00018774	F53G12.9	66.6908	-1.62585	0.464002	-3.50397	0.000458383	0.16228
WBGene00009673	F43G9.13	650.452	-0.876171	0.251698	-3.48104	0.000499477	0.169755
WBGene00010617	K07A1.13	388.064	0.951049	0.272947	3.48437	0.000493289	0.169755
WBGene00011558	T07A5.5	756.888	-1.8877	0.54186	-3.48375	0.000494448	0.169755
WBGene00044399	F11F1.8	6.89845	-4.87614	1.4042	-3.47254	0.000515555	0.172914
WBGene00006928	vit-4	20325.5	1.73422	0.501413	3.45866	0.000542875	0.179713	Vitellogenin-4 [Source:UniProtKB/Swiss-Prot;Acc:P18947]
WBGene00012910	Y46G5A.20	190.726	-1.75171	0.509869	-3.43561	0.000591229	0.190765
WBGene00022457	Y110A7A.7	366.698	-0.638235	0.185699	-3.43694	0.000588319	0.190765
WBGene00016916	C54D2.2	44.933	-1.3229	0.385773	-3.42921	0.000605336	0.192875
WBGene00001915	his-41	2393.63	-0.598014	0.17498	-3.41761	0.000631726	0.194008	Probable histone H2B 3 [Source:UniProtKB/Swiss-Prot;Acc:Q27484]
WBGene00006930	vit-6	282148	1.42461	0.416512	3.42033	0.000625451	0.194008	Vitellogenin-6 [Source:UniProtKB/Swiss-Prot;Acc:P18948]
WBGene00220040	R10E11.13	336.033	0.84907	0.248013	3.4235	0.000618211	0.194008	NA
WBGene00185102	Y105C5A.1268	16.4322	-2.1201	0.621705	-3.41015	0.000649281	0.197026
WBGene00004016	phf-5	1253.58	-1.22518	0.359987	-3.40341	0.000665509	0.197254	PHF-5; PHd Finger family [Source:UniProtKB/TrEMBL;Acc:G5EBY6]
WBGene00045271	F07G6.10	58.3388	-1.66618	0.48954	-3.40356	0.000665146	0.197254
WBGene00006926	vit-2	292111	1.29635	0.382041	3.39324	0.000690721	0.202373	Vitellogenin-2 [Source:UniProtKB/Swiss-Prot;Acc:P05690]
WBGene00235319	F44E7.17	179.277	-0.962534	0.284067	-3.38841	0.000702993	0.203628
WBGene00022951	C30E1.9	1355.82	-0.981983	0.290807	-3.37675	0.000733479	0.210072
WBGene00006066	sto-4	710.706	-0.73035	0.217267	-3.36154	0.000775099	0.219525	Stomatin-4 [Source:UniProtKB/Swiss-Prot;Acc:Q22165]
WBGene00017813	F26A10.1	70.214	-1.05816	0.322819	-3.27789	0.00104587	0.292958
WBGene00013985	sec-16	3093.54	1.02006	0.312053	3.26888	0.00107975	0.298895
WBGene00014123	elpc-3	2690.27	0.530149	0.16232	3.26607	0.00109051	0.298895	Probable elongator complex protein 3 [Source:UniProtKB/Swiss-Prot;Acc:Q23651]
WBGene00017498	pud-4	2796.8	1.96511	0.60284	3.25976	0.00111508	0.300106	Protein Up-regulated in Daf-2(Gf) [Source:UniProtKB/TrEMBL;Acc:M1ZMJ3]
WBGene00021743	Y50D4B.4	191.802	0.734432	0.225362	3.25889	0.00111848	0.300106
WBGene00020893	T28C12.6	73.5453	-1.19413	0.366854	-3.25504	0.00113377	0.301038
WBGene00009055	F22D6.14	59.0519	-1.47713	0.455333	-3.24406	0.00117837	0.306497
WBGene00015641	C09E7.7	156.044	1.26315	0.389051	3.24675	0.0011673	0.306497
WBGene00018670	F52C6.13	15.3713	-2.22998	0.688406	-3.23933	0.00119811	0.308482
WBGene00007476	C09E9.1	819.393	-0.592101	0.183432	-3.22791	0.00124699	0.317858
WBGene00008486	ugt-44	1784.07	0.457234	0.142193	3.21557	0.00130184	0.328552	UDP-GlucuronosylTransferase [Source:UniProtKB/TrEMBL;Acc:O17757]
WBGene00044181	F09C6.11	8.08897	-2.79342	0.869588	-3.21235	0.00131655	0.329007
WBGene00006927	vit-3	30677.1	1.61563	0.503651	3.20784	0.00133735	0.330962	Vitellogenin-3 [Source:UniProtKB/Swiss-Prot;Acc:Q9N4J2]
WBGene00009634	nspc-9	891.169	0.86605	0.270422	3.20259	0.00136199	0.333817	Nematode Specific Peptide family, group C [Source:UniProtKB/TrEMBL;Acc:Q20345]
WBGene00012371	W09G3.8	341.836	-1.6408	0.512907	-3.19902	0.00137893	0.334752
WBGene00235373	Y24D9A.14	4.37779	-4.32895	1.35582	-3.19285	0.00140875	0.338764
WBGene00007282	clec-223	455.039	1.3337	0.418899	3.18384	0.00145337	0.343023	C-type LECtin [Source:UniProtKB/TrEMBL;Acc:O17562]
WBGene00014030	glb-1	1164.5	-1.44503	0.453697	-3.185	0.00144752	0.343023	Globin-like protein [Source:UniProtKB/Swiss-Prot;Acc:P30627]
WBGene00014871	Y37H9A.5	70.1308	-1.2122	0.383802	-3.15841	0.00158635	0.370972
WBGene00197636	Y67D8C.16	0.420868	-16.5146	5.23473	-3.15482	0.00160597	0.372146	NA
WBGene00007588	C14C10.5	5479.6	0.716572	0.228528	3.1356	0.00171501	0.376859
WBGene00011240	R11A8.7	3690.7	0.977849	0.311607	3.13809	0.00170054	0.376859	Ankyrin repeat and KH domain-containing protein R11A8.7 [Source:UniProtKB/Swiss-Prot;Acc:Q21920]
WBGene00016326	ubr-1	3925.88	0.821551	0.261943	3.13637	0.00171052	0.376859	E3 ubiquitin-protein ligase ubr-1 [Source:UniProtKB/Swiss-Prot;Acc:P91133]
WBGene00016652	got-2.1	1651.36	0.487699	0.155376	3.13883	0.00169626	0.376859	Aspartate aminotransferase [Source:UniProtKB/TrEMBL;Acc:O01804]
WBGene00019792	M116.5	407.316	0.739417	0.235798	3.1358	0.00171386	0.376859
WBGene00044509	K07H8.12	72.2163	-1.44264	0.459907	-3.1368	0.00170804	0.376859
WBGene00023503	F17C11.13	23.342	-1.56496	0.499518	-3.13294	0.00173063	0.377042
WBGene00013287	Y57A10C.9	16.3283	-1.54566	0.495784	-3.11761	0.00182321	0.386705
WBGene00019120	npl-4.1	733.256	0.709535	0.2275	3.11883	0.00181572	0.386705	NPL (Yeast Nuclear Protein Localization) homolog [Source:UniProtKB/TrEMBL;Acc:H2KYU6]
WBGene00044143	K09E9.4	53.1327	-1.4599	0.468576	-3.11561	0.00183567	0.386705
WBGene00195975	K09A9.9	2.51702	-5.10821	1.63757	-3.11937	0.00181235	0.386705	NA
WBGene00219619	linc-76	119.55	-0.735605	0.236346	-3.1124	0.0018557	0.38772	NA
WBGene00016405	hecd-1	8965.84	0.806917	0.260243	3.10063	0.00193111	0.389699	HECtD1 ubiquitin ligase homolog [Source:UniProtKB/TrEMBL;Acc:V6CJX7]
WBGene00017949	F31D5.6	253.293	-1.32516	0.427606	-3.09902	0.00194162	0.389699
WBGene00023429	W08G11.6	8.23035	-4.6177	1.48643	-3.10657	0.00189268	0.389699
WBGene00044224	F17C8.8	17.0705	-2.05335	0.661226	-3.10537	0.00190042	0.389699
WBGene00235181	F35E12.13	3.14979	-4.68668	1.5118	-3.10006	0.00193479	0.389699
WBGene00006912	vha-3	4688.76	-0.754399	0.243691	-3.09572	0.00196338	0.390988	V-type proton ATPase 16 kDa proteolipid subunit 2/3 [Source:UniProtKB/Swiss-Prot;Acc:P34546]
WBGene00003349	mir-255	2.73014	-4.62086	1.50081	-3.07892	0.00207755	0.398171
WBGene00008530	F02E9.5	1444.07	-0.780645	0.252968	-3.08594	0.00202907	0.398171
WBGene00012973	spat-2	2938.35	0.909525	0.294884	3.08435	0.00203998	0.398171	Suppressor of PAr-Two defect [Source:UniProtKB/TrEMBL;Acc:A0A1I6CM95]
WBGene00017239	F08B6.1	248.087	-1.01426	0.329227	-3.08075	0.00206482	0.398171
WBGene00050947	K07C5.13	23.4242	-1.94111	0.630097	-3.08065	0.00206552	0.398171
WBGene00002099	ins-16	28.0017	-2.40464	0.782814	-3.07179	0.00212777	0.404425	INSulin related [Source:UniProtKB/TrEMBL;Acc:Q7KX46]
WBGene00013680	rpom-1	1256.43	0.77638	0.252908	3.06982	0.00214191	0.404425	DNA-directed RNA polymerase [Source:UniProtKB/TrEMBL;Acc:A5PEY3]
WBGene00016386	tag-272	21.6018	-1.93824	0.633885	-3.05772	0.00223027	0.418012
WBGene00019940	npp-21	6336.57	1.08137	0.35469	3.04877	0.00229784	0.427532	Nuclear Pore complex Protein [Source:UniProtKB/TrEMBL;Acc:Q5WRT9]
WBGene00022500	lfi-1	1771.98	0.917518	0.301544	3.04274	0.00234438	0.433031	Lin-5 (Five) Interacting protein [Source:UniProtKB/TrEMBL;Acc:Q45EJ8]
WBGene00219949	F44E5.16	4.37081	-4.09648	1.34741	-3.04026	0.00236375	0.433468	NA
WBGene00005180	srg-23	7.29551	2.1012	0.693607	3.02938	0.00245059	0.446182	Serpentine receptor class gamma [Source:UniProtKB/TrEMBL;Acc:Q9TYL6]
WBGene00019121	npl-4.2	878.866	0.611125	0.202038	3.02481	0.0024879	0.449763	NPL (Yeast Nuclear Protein Localization) homolog [Source:UniProtKB/TrEMBL;Acc:Q95QZ9]
WBGene00018664	bath-11	68.0662	-1.08252	0.358175	-3.02231	0.00250853	0.450298
WBGene00010803	M01B2.10	107.661	-0.771376	0.255732	-3.01635	0.00255838	0.452868
WBGene00016993	CD4.8	394.581	0.597537	0.198051	3.01709	0.00255217	0.452868
WBGene00007260	olrn-1	473.605	-0.505236	0.167968	-3.00794	0.00263026	0.462381
WBGene00010013	F54B3.1	2093.09	0.913646	0.304787	2.99765	0.00272066	0.474998
WBGene00022354	Y82E9BR.22	360.013	-1.26563	0.422699	-2.99416	0.00275199	0.477199
WBGene00014944	Y68A4A.12	17.4472	-3.1179	1.04339	-2.98824	0.00280591	0.483261
WBGene00007681	C18D11.3	2962.71	-0.799204	0.26843	-2.97732	0.00290776	0.484437
WBGene00012434	Y11D7A.10	2445.17	-0.771694	0.258938	-2.98023	0.00288037	0.484437
WBGene00175027	W02F12.8	123.839	-2.44602	0.820595	-2.98078	0.00287512	0.484437
WBGene00195209	C07B5.8	26.7651	-2.11495	0.710266	-2.97768	0.00290437	0.484437
WBGene00220000	K02F2.11	2.80038	-4.65014	1.55936	-2.98208	0.00286296	0.484437	NA
WBGene00023493	nspc-12	4.09994	-4.59508	1.54691	-2.97049	0.00297329	0.488962	Nematode Specific Peptide family, group C [Source:UniProtKB/TrEMBL;Acc:G5EC48]
WBGene00194861	H04D03.6	89.3094	1.2198	0.410488	2.97158	0.00296273	0.488962
WBGene00001829	hcp-1	4889.86	1.19761	0.405383	2.95426	0.00313424	0.50873	HoloCentric chromosome binding Protein [Source:UniProtKB/TrEMBL;Acc:O76447]
WBGene00011978	T24B8.4	874.14	0.49259	0.166636	2.95609	0.0031157	0.50873
WBGene00077773	F25H5.10	105.536	-1.0794	0.365605	-2.95238	0.00315337	0.50873
WBGene00014920	Y53F4B.38	12.0471	-2.71413	0.921077	-2.94669	0.00321191	0.514915
WBGene00009339	F32G8.3	7.28059	-2.3432	0.79752	-2.9381	0.00330227	0.526092
WBGene00004097	pqm-96	3.50627	-4.22133	1.44187	-2.92768	0.00341499	0.537334	ParaQuat (Methylviologen) responsive [Source:UniProtKB/TrEMBL;Acc:Q95ZP9]
WBGene00013637	Y105C5A.13	34.4959	-1.74088	0.594499	-2.92832	0.00340797	0.537334
WBGene00001123	dyf-7	94.0201	-0.877598	0.300184	-2.92353	0.00346085	0.541209
WBGene00001704	grd-15	16.6709	-1.59855	0.549447	-2.90939	0.00362137	0.556076	GRounDhog (Hedgehog-like family) [Source:UniProtKB/TrEMBL;Acc:Q7YXB4]
WBGene00015008	lmd-2	198.887	-0.748509	0.256977	-2.91275	0.00358261	0.556076	LysM Domain (Peptidoglycan binding) protein [Source:UniProtKB/TrEMBL;Acc:O02055]
WBGene00016330	C32E12.4	449.134	1.07477	0.369253	2.91067	0.0036066	0.556076
WBGene00001842	her-1	46.8711	-1.37767	0.474939	-2.90072	0.00372308	0.560973	HERmaphrodization of XO animals [Source:UniProtKB/TrEMBL;Acc:Q65ZB2]
WBGene00017501	pud-3	4737.28	1.55084	0.534921	2.89919	0.00374128	0.560973	5C820; Protein Up-regulated in Daf-2(Gf) [Source:UniProtKB/TrEMBL;Acc:G5EEV5]
WBGene00022221	Y73B3A.20	53.7739	-1.15759	0.399214	-2.89967	0.00373559	0.560973
WBGene00219266	mir-4938	18.5723	-1.80632	0.622255	-2.90286	0.0036977	0.560973
WBGene00003426	msp-19	28.1556	-5.36692	1.86185	-2.88257	0.00394445	0.564853	Major sperm protein 19/31/40/45/50/51/53/59/61/65/81/113/142 [Source:UniProtKB/Swiss-Prot;Acc:P53017]
WBGene00005523	sri-11	16.9875	-1.81065	0.627058	-2.88753	0.00388281	0.564853	Serpentine Receptor, class I [Source:UniProtKB/TrEMBL;Acc:O18110]
WBGene00006212	str-168	21.2781	-1.51703	0.52585	-2.88491	0.00391521	0.564853	Seven TM Receptor [Source:UniProtKB/TrEMBL;Acc:Q9N2T0]
WBGene00006941	wnk-1	3319.28	0.721823	0.250402	2.88265	0.00394341	0.564853	Serine/threonine-protein kinase WNK [Source:UniProtKB/Swiss-Prot;Acc:X5M5N0]
WBGene00015280	C01B10.6	6483.75	0.823213	0.284873	2.88976	0.0038554	0.564853
WBGene00018898	F55F10.1	2627.88	0.765489	0.265455	2.88369	0.00393043	0.564853	Midasin [Source:UniProtKB/TrEMBL;Acc:O61851]
WBGene00077537	Y47H10A.6	21.6596	-1.70342	0.590544	-2.88449	0.00392049	0.564853
WBGene00200170	DL2.2	2.17678	-4.99452	1.7326	-2.88267	0.00394324	0.564853	NA
WBGene00235277	T04C4.3	5.75719	-4.10392	1.42898	-2.87193	0.00407979	0.580971
WBGene00011763	T14B1.1	954.605	-0.906278	0.315989	-2.86807	0.00412983	0.58483
WBGene00008459	mrpl-53	1163.55	-0.970834	0.339377	-2.86063	0.00422794	0.595416	Mitochondrial Ribosomal Protein, Large [Source:UniProtKB/TrEMBL;Acc:Q7YX52]
WBGene00195246	ZK546.19	3.50598	-4.31812	1.51147	-2.85689	0.0042781	0.599169
WBGene00000455	ceh-34	121.607	-0.792763	0.279912	-2.83219	0.00462309	0.61464	Homeobox protein ceh-34 [Source:UniProtKB/Swiss-Prot;Acc:Q94165]
WBGene00003525	nas-6	52.1781	-1.57726	0.557127	-2.83105	0.00463951	0.61464	Zinc metalloproteinase nas-6 [Source:UniProtKB/Swiss-Prot;Acc:Q9U3S9]
WBGene00007222	C01F6.2	71.0355	1.0161	0.358786	2.83204	0.00462517	0.61464
WBGene00012432	Y11D7A.8	39.9354	1.25633	0.442791	2.8373	0.00454965	0.61464
WBGene00012584	ceh-100	1829.84	0.812904	0.285747	2.84484	0.00444336	0.61464	C. Elegans Homeobox [Source:UniProtKB/TrEMBL;Acc:Q7K714]
WBGene00013634	Y105C5A.9	3.58846	-4.21105	1.47955	-2.84618	0.00442475	0.61464
WBGene00019124	F59E12.9	3687.64	0.790708	0.279305	2.83098	0.00464054	0.61464
WBGene00020008	R11F4.2	62.0359	-0.759198	0.267822	-2.83471	0.00458676	0.61464
WBGene00219289	T05C12.15	20.6919	-1.55714	0.550214	-2.83007	0.00465381	0.61464
WBGene00219885	F09E10.14	3.61556	-3.91945	1.3806	-2.83896	0.00452615	0.61464	NA
WBGene00220188	Y65B4A.10	208.161	-1.55751	0.549331	-2.83529	0.00457844	0.61464
WBGene00016039	C24A8.5	23.3585	-1.20317	0.428094	-2.81053	0.00494595	0.646525
WBGene00017818	F26D11.1	237.525	-1.24208	0.441814	-2.81133	0.00493379	0.646525	Gluconokinase [Source:UniProtKB/TrEMBL;Acc:O61968]
WBGene00010429	H38K22.4	3.05226	-4.62691	1.64769	-2.80812	0.00498311	0.648058
WBGene00019829	R02E12.5	52.2	-1.17566	0.418953	-2.80618	0.0050133	0.648675
WBGene00001858	hil-7	138.647	-1.31824	0.470365	-2.80259	0.00506944	0.652627	HIstone H1 Like; Histone H1.Q [Source:UniProtKB/TrEMBL;Acc:Q9U3W3]
WBGene00195248	emc-5	391.16	-0.603696	0.215563	-2.80055	0.0051015	0.653454	EMC Endoplasmic Membrane protein Complex (Yeast EMC) homolog [Source:UniProtKB/TrEMBL;Acc:E1B6R8]
WBGene00003124	2001-05-01	466.663	-0.690525	0.247168	-2.79375	0.00521008	0.664025	ATPase inhibitor mai-1, mitochondrial [Source:UniProtKB/Swiss-Prot;Acc:P37209]
WBGene00004874	smc-4	5148.33	0.92302	0.330763	2.79058	0.00526132	0.667219	Structural maintenance of chromosomes protein 4 [Source:UniProtKB/Swiss-Prot;Acc:Q20060]
WBGene00044339	nspc-4	250.912	1.06891	0.383522	2.78708	0.00531855	0.671138	Nematode Specific Peptide family, group C [Source:UniProtKB/TrEMBL;Acc:Q4TTA4]
WBGene00015633	C09D4.2	1056.09	0.764721	0.274825	2.78258	0.00539289	0.677166
WBGene00016746	C48B6.10	2174.93	-1.17552	0.423316	-2.77693	0.00548751	0.68567
WBGene00015052	clec-52	2807.24	0.812812	0.293114	2.77303	0.00555377	0.690563	C-type LECtin [Source:UniProtKB/TrEMBL;Acc:Q17452]
WBGene00016558	pks-1	310.213	0.804926	0.291277	2.76344	0.00571958	0.707729	PolyKetide Synthase [Source:UniProtKB/TrEMBL;Acc:Q18559]
WBGene00016907	C53H9.2	10974.6	0.707815	0.256903	2.75518	0.00586596	0.722335
WBGene00009691	F44E5.4	56.7599	1.13408	0.412422	2.74981	0.00596307	0.723803
WBGene00017780	F25E2.2	1931.42	0.750905	0.27286	2.75198	0.00592362	0.723803
WBGene00189958	F45H11.8	666.899	-1.18702	0.43167	-2.74982	0.00596278	0.723803
WBGene00003822	nsy-1	1247.4	0.533775	0.194318	2.74691	0.00601587	0.724713	Mitogen-activated protein kinase kinase kinase nsy-1 [Source:UniProtKB/Swiss-Prot;Acc:Q21029]
WBGene00011182	R09H10.5	3943.96	0.576356	0.209867	2.74629	0.00602743	0.724713
WBGene00015531	C06E4.2	46.3891	-1.52719	0.556703	-2.74327	0.00608298	0.727958
WBGene00020097	larp-1	6475.28	0.865298	0.316683	2.73238	0.00628789	0.742619	La-related protein 1 [Source:UniProtKB/Swiss-Prot;Acc:D5MCN2]
WBGene00020586	frpr-18	83.6032	-0.822673	0.301112	-2.73212	0.00629289	0.742619	FLP-2 receptor; FMRFamide Peptide Receptor family [Source:UniProtKB/TrEMBL;Acc:G5EGC5]
WBGene00021658	Y48G1A.2	1201.51	-1.03148	0.377514	-2.7323	0.00628939	0.742619
WBGene00017982	hpo-18	4242.73	-1.56046	0.572785	-2.72435	0.00644286	0.753342
WBGene00220178	Y52D3.2	229.979	0.631201	0.231589	2.72552	0.00642001	0.753342
WBGene00003423	msi-1	2667.16	0.629725	0.231588	2.71916	0.00654483	0.76112	MuSashI (Fly neural) family; Neural RNA-binding protein MSI-1 [Source:UniProtKB/TrEMBL;Acc:G5EFS2]
WBGene00044531	F13A2.9	23.1675	-1.53228	0.563765	-2.71793	0.0065691	0.76112
WBGene00000750	col-177	27.3084	-1.04199	0.386804	-2.69385	0.00706324	0.774743	COLlagen [Source:UniProtKB/TrEMBL;Acc:Q21039]
WBGene00000911	daf-15	2461.93	1.04497	0.387875	2.69408	0.0070584	0.774743	DAF-15 [Source:UniProtKB/TrEMBL;Acc:Q68TI8]
WBGene00001171	egl-2	97.0355	-0.951009	0.351565	-2.70507	0.00682899	0.774743	EAG K+ channel EGL-2 [Source:UniProtKB/TrEMBL;Acc:Q9XYX7]
WBGene00008476	E03H4.8	1749.78	-0.572847	0.212744	-2.69266	0.00708851	0.774743
WBGene00015014	bath-24	253.593	0.692419	0.256951	2.69475	0.00704419	0.774743	BTB and MATH domain containing [Source:UniProtKB/TrEMBL;Acc:O16566]
WBGene00015437	scrm-3	75.9007	-0.870061	0.323447	-2.68997	0.00714587	0.774743	Phospholipid scramblase [Source:UniProtKB/TrEMBL;Acc:G5EG07]
WBGene00015560	C07A12.2	33.3127	-1.29395	0.479353	-2.69936	0.00694721	0.774743
WBGene00015908	C17F3.3	14.7102	4.31411	1.60403	2.68955	0.00715487	0.774743
WBGene00017701	F22D3.5	2.73091	-4.43635	1.63695	-2.71012	0.00672585	0.774743
WBGene00018671	F52C6.14	16.1445	-1.46995	0.543981	-2.7022	0.00688818	0.774743
WBGene00020819	T26A5.2	879.076	1.11637	0.415209	2.6887	0.00717298	0.774743
WBGene00022700	ZK353.4	25.7077	1.21748	0.450801	2.70071	0.00691909	0.774743
WBGene00022853	ZK1127.6	475.701	0.731953	0.27195	2.6915	0.00711317	0.774743
WBGene00044411	R12B2.8	30.2881	-1.28855	0.477529	-2.69838	0.00696787	0.774743
WBGene00200308	C56C10.15	4.37874	-4.4131	1.63571	-2.69796	0.00697651	0.774743	NA
WBGene00219678	linc-9	42.7697	-1.20072	0.445382	-2.69593	0.00701931	0.774743	NA
WBGene00009799	lgc-47	179.657	-0.658228	0.246081	-2.67484	0.00747644	0.804111	Ligand-Gated ion Channel [Source:UniProtKB/TrEMBL;Acc:G5EC54]
WBGene00010520	cpx-2	70.6864	-0.741813	0.278014	-2.66826	0.00762461	0.806129	ComPleXin (Synaptic protein) homolog [Source:UniProtKB/TrEMBL;Acc:Q21168]
WBGene00015122	B0302.5	823.487	0.423731	0.158679	2.67036	0.00757691	0.806129
WBGene00022825	ZK816.1	76.1749	-0.695346	0.260662	-2.66762	0.00763909	0.806129
WBGene00023068	rpl-41.2	32224.8	-1.86221	0.696876	-2.67223	0.00753497	0.806129	Ribosomal Protein, Large subunit [Source:UniProtKB/TrEMBL;Acc:A0A0M6VD87]
WBGene00023318	K07D4.1	81.0379	-0.836886	0.313794	-2.66699	0.00765332	0.806129
WBGene00020345	T08B2.4	40.1252	-1.25605	0.471452	-2.6642	0.00771705	0.809497
WBGene00015605	C08E3.13	33.0243	-1.52948	0.575058	-2.65971	0.0078209	0.817028
WBGene00194793	W04G3.13	30.8146	1.12448	0.424186	2.6509	0.00802775	0.835214
WBGene00008113	C46C2.5	2076.21	1.00776	0.381077	2.64451	0.00818089	0.842073
WBGene00008849	try-10	264.484	0.952172	0.360494	2.6413	0.00825886	0.842073	TRYpsin-like protease [Source:UniProtKB/TrEMBL;Acc:E1B6T7]
WBGene00016534	C39D10.7	13024.1	1.25764	0.475721	2.64365	0.00820165	0.842073
WBGene00077593	C49G7.12	945.37	-0.78442	0.296886	-2.64216	0.00823794	0.842073
WBGene00194716	ZK637.18	7.82453	-3.21519	1.2171	-2.64169	0.00824938	0.842073
WBGene00206528	Y53H1A.7	3.22642	-3.79031	1.43596	-2.63955	0.00830153	0.843051
WBGene00021160	gba-4	1374.83	0.868566	0.329282	2.63776	0.00834558	0.844163	Putative glucosylceramidase 4 [Source:UniProtKB/Swiss-Prot;Acc:Q9UB00]
WBGene00000439	ceh-16	139.14	-0.762353	0.289414	-2.63413	0.00843541	0.849876	Homeobox protein engrailed-like ceh-16 [Source:UniProtKB/Swiss-Prot;Acc:P34326]
WBGene00000140	anc-1	2641.06	0.810141	0.308087	2.62959	0.00854886	0.85351	Nuclear anchorage protein 1 [Source:UniProtKB/Swiss-Prot;Acc:Q9N4M4]
WBGene00010019	F54B8.4	861.803	-0.441678	0.168	-2.62903	0.00856281	0.85351
WBGene00015932	C17H12.6	422.923	0.716435	0.27259	2.62825	0.00858242	0.85351
WBGene00017539	F17E9.2	340.836	0.77856	0.296329	2.62734	0.00860542	0.85351
WBGene00006925	vit-1	13268	1.05976	0.403726	2.62496	0.00866598	0.855228	Vitellogenin-1 [Source:UniProtKB/Swiss-Prot;Acc:P55155]
WBGene00016187	C28G1.2	38.3982	1.28794	0.491238	2.62183	0.00874593	0.855228
WBGene00016559	C41A3.2	121.243	1.05324	0.401785	2.6214	0.00875695	0.855228
WBGene00219734	linc-128	2.37259	-4.01782	1.53165	-2.62321	0.00871067	0.855228	NA
WBGene00219826	C18H9.12	228.143	0.708579	0.270698	2.6176	0.00885502	0.861505	NA
WBGene00001406	fce-2	919.209	-0.43867	0.167902	-2.61266	0.00898409	0.866302	CAAX prenyl protease 2 homolog [Source:UniProtKB/Swiss-Prot;Acc:G5EEP3]
WBGene00004453	rpl-39	17428.8	-1.37798	0.527276	-2.6134	0.00896473	0.866302	60S ribosomal protein L39 [Source:UniProtKB/Swiss-Prot;Acc:P52814]
WBGene00008557	F07H5.6	18.8374	-1.84028	0.704597	-2.61182	0.00900628	0.866302
WBGene00003412	mrp-6	474.867	0.595424	0.228287	2.60823	0.0091012	0.867387
WBGene00003545	nas-27	116.609	-1.79666	0.689229	-2.60676	0.00914025	0.867387	Zinc metalloproteinase nas-27 [Source:UniProtKB/Swiss-Prot;Acc:O17264]
WBGene00004947	sos-1	879.732	0.685572	0.263048	2.60626	0.00915367	0.867387	Son of sevenless homolog [Source:UniProtKB/Swiss-Prot;Acc:Q9N5D3]
WBGene00009880	F49C12.11	8116.29	-0.968168	0.371067	-2.60915	0.00907681	0.867387	Translation machinery-associated protein 7 homolog [Source:UniProtKB/Swiss-Prot;Acc:Q20588]
WBGene00016105	C25F6.6	14.2881	-1.7178	0.659793	-2.60354	0.00922674	0.869006
WBGene00194855	Y75B8A.44	47.4285	-1.91875	0.737106	-2.60308	0.00923894	0.869006
WBGene00010961	nduo-2	3824.45	-1.5005	0.577579	-2.59792	0.00937899	0.875716	NADH-ubiquinone oxidoreductase chain 2 [Source:UniProtKB/Swiss-Prot;Acc:P24889]
WBGene00019639	K10F12.7	5.20483	-2.50291	0.963052	-2.59893	0.00935138	0.875716
WBGene00000962	dhc-1	8719.79	0.696782	0.268568	2.59443	0.00947476	0.876246	Dynein heavy chain, cytoplasmic [Source:UniProtKB/Swiss-Prot;Acc:Q19020]
WBGene00001830	hcp-2	4183.67	0.809726	0.312424	2.59175	0.00954891	0.876246	HoloCentric chromosome binding Protein [Source:UniProtKB/TrEMBL;Acc:Q22257]
WBGene00002295	let-19	1447.69	0.89682	0.346724	2.58656	0.00969405	0.876246	Mediator of RNA polymerase II transcription subunit 13 [Source:UniProtKB/Swiss-Prot;Acc:Q93442]
WBGene00004140	ebax-1	920.167	0.432908	0.167319	2.58731	0.00967276	0.876246	Elongin-B/C E3 ligase in AXon guidance [Source:UniProtKB/TrEMBL;Acc:Q21875]
WBGene00010050	F54D5.4	10296.9	0.572864	0.221293	2.58872	0.00963344	0.876246
WBGene00010734	parn-1	572.374	0.769986	0.297254	2.59033	0.00958833	0.876246	3'-5' exoribonuclease parn-1 [Source:UniProtKB/Swiss-Prot;Acc:Q21412]
WBGene00020242	phat-5	135.645	-1.29081	0.498061	-2.59166	0.00955136	0.876246	PHAryngeal gland Toxin-related [Source:UniProtKB/TrEMBL;Acc:O16420]
WBGene00044535	K11D12.13	1544.11	1.1489	0.443619	2.58984	0.00960205	0.876246
WBGene00174662	21ur-7638	11.3354	1.42389	0.549375	2.59184	0.00954648	0.876246	NA
WBGene00016406	C34D10.1	486.235	-0.571404	0.221466	-2.5801	0.00987707	0.889634
WBGene00003210	mel-28	4782	0.984687	0.383187	2.56973	0.0101778	0.89026
WBGene00003356	mir-262	15.5549	1.49552	0.581151	2.57337	0.0100714	0.89026
WBGene00003827	ntl-4	2520.56	0.477249	0.18593	2.56682	0.0102636	0.89026	NOT-Like (Yeast CCR4/NOT complex component) [Source:UniProtKB/TrEMBL;Acc:W6RTE4]
WBGene00007196	B0513.4	7147.11	0.857987	0.335045	2.56081	0.0104428	0.89026
WBGene00012760	Y41C4A.17	14.4655	-3.30195	1.2876	-2.56442	0.0103347	0.89026
WBGene00013871	gnrr-3	14.3581	-1.34463	0.521898	-2.57642	0.00998307	0.89026	GoNadotropin-Releasing hormone Receptor (GnRHR) related [Source:UniProtKB/TrEMBL;Acc:Q23265]
WBGene00015890	C17C3.5	108.557	1.76599	0.689539	2.56112	0.0104334	0.89026
WBGene00017299	molo-1	114.441	-0.675516	0.262756	-2.57089	0.0101439	0.89026
WBGene00018219	F40A3.4	43.9019	-1.28574	0.501327	-2.56467	0.0103275	0.89026
WBGene00019203	ttr-47	2561.56	0.658559	0.256946	2.56302	0.0103765	0.89026	TransThyretin-Related family domain [Source:UniProtKB/TrEMBL;Acc:O61977]
WBGene00020374	T09A12.5	1136.15	-1.19088	0.464211	-2.56537	0.0103065	0.89026
WBGene00022476	fbxa-75	24.0974	-2.15037	0.835204	-2.57467	0.0100336	0.89026	F-box A protein [Source:UniProtKB/TrEMBL;Acc:Q966E2]
WBGene00200459	F38H4.15	5.26847	-3.43404	1.33716	-2.56817	0.0102238	0.89026	NA
WBGene00219493	C18D4.12	17.2165	-1.76696	0.689249	-2.56359	0.0103595	0.89026
WBGene00220140	Y34F4.7	4.7728	-3.64221	1.42131	-2.56257	0.0103901	0.89026
WBGene00235391	F38A5.22	185.839	1.24807	0.487142	2.56202	0.0104065	0.89026
WBGene00004148	pqn-65	2448.19	0.741752	0.290212	2.5559	0.0105914	0.897593	Prion-like-(Q/N-rich)-domain-bearing protein [Source:UniProtKB/TrEMBL;Acc:H2KYH2]
WBGene00008407	D2023.3	65.994	-0.7974	0.312016	-2.55564	0.0105993	0.897593
WBGene00015813	thoc-2	2775.65	1.23738	0.484632	2.55323	0.0106729	0.900832	THO Complex (Transcription factor/nuclear export) subunit [Source:UniProtKB/TrEMBL;Acc:Q18033]
WBGene00007816	C30F2.2	28.2514	-1.19251	0.467374	-2.55152	0.0107255	0.900956
WBGene00045077	Y71A12B.18	88.7495	-0.887437	0.347894	-2.55088	0.010745	0.900956
WBGene00005188	srg-31	84.2986	-0.791463	0.310435	-2.54953	0.0107869	0.901438	Serpentine receptor class gamma-31 [Source:UniProtKB/Swiss-Prot;Acc:O61892]
WBGene00044537	B0238.15	17.8963	-1.93788	0.760428	-2.54841	0.0108215	0.901438
WBGene00044903	K03H1.13	621.35	0.690894	0.271394	2.54573	0.0109051	0.905441
WBGene00012863	Y45F3A.8	35.6873	-1.48842	0.58518	-2.54352	0.0109743	0.908232
WBGene00044413	B0205.12	213.988	-1.67636	0.659816	-2.54064	0.0110648	0.91276
WBGene00009780	F46C5.4	37.7024	-0.936007	0.368664	-2.53892	0.0111196	0.914319
WBGene00009744	hpo-35	1640.39	0.786043	0.309983	2.53576	0.0112204	0.919637
WBGene00002889	let-765	4697.93	0.801479	0.31661	2.53144	0.0113595	0.928057	Notch signaling pathway homolog-1 [Source:UniProtKB/TrEMBL;Acc:O01737]
WBGene00009078	rpb-12	1593.73	-1.39072	0.550806	-2.52488	0.0115738	0.942231	RNA Polymerase II (B) subunit [Source:UniProtKB/TrEMBL;Acc:X5M5N4]
WBGene00020167	T02G5.11	40.6982	-1.00417	0.397925	-2.52351	0.0116188	0.942231
WBGene00194649	Y57G11C.1130	88.2685	0.906373	0.359279	2.52276	0.0116439	0.942231
WBGene00003777	nmy-2	8578.91	1.19671	0.476565	2.51112	0.0120349	0.946819	Non-muscle MYosin [Source:UniProtKB/TrEMBL;Acc:G5EBY3]
WBGene00006375	syp-1	1219.58	1.08025	0.429333	2.51611	0.0118659	0.946819	Synaptonemal complex protein SYP-1 [Source:UniProtKB/TrEMBL;Acc:G5EGS8]
WBGene00009189	F27D4.4	4176.14	0.642238	0.25566	2.51208	0.0120021	0.946819	Zinc finger CCCH domain-containing protein 15 homolog [Source:UniProtKB/Swiss-Prot;Acc:Q93618]
WBGene00010765	K10H10.10	32.724	-1.5583	0.620236	-2.51242	0.0119905	0.946819
WBGene00013426	Y66A7A.7	196.071	-1.25946	0.50012	-2.51832	0.0117916	0.946819
WBGene00015741	C13F10.1	93.8428	-0.772057	0.307023	-2.51465	0.0119151	0.946819
WBGene00019290	K02A2.5	47.3713	-0.856062	0.340903	-2.51116	0.0120334	0.946819
WBGene00020236	lgc-1	15.5722	-1.44694	0.57477	-2.51742	0.0118219	0.946819	Ligand-Gated ion Channel [Source:UniProtKB/TrEMBL;Acc:O16426]
WBGene00219413	Y38F2AL.12	18.7457	-1.70429	0.677243	-2.51652	0.0118521	0.946819
WBGene00015597	fbxa-162	108.822	0.618433	0.246525	2.50861	0.0121208	0.950642
WBGene00003040	lin-59	1755.08	0.798594	0.318525	2.50716	0.0121704	0.951609	Probable histone-lysine N-methyltransferase lin-59 [Source:UniProtKB/Swiss-Prot;Acc:O44757]
WBGene00010032	F54B11.9	81.3824	-1.18094	0.4722	-2.50092	0.012387	0.95971
WBGene00019314	K02E7.10	51.3502	-0.79872	0.319326	-2.50127	0.0123749	0.95971
WBGene00219985	F58D5.13	169.735	0.635831	0.254029	2.50299	0.012315	0.95971	NA
WBGene00002694	let-502	3518.67	0.919124	0.369213	2.48941	0.0127954	0.963627	Rho-associated protein kinase let-502 [Source:UniProtKB/Swiss-Prot;Acc:P92199]
WBGene00007485	C09G1.3	18.6427	-1.63901	0.65854	-2.48885	0.0128156	0.963627
WBGene00009267	usp-48	3168.87	1.02241	0.410749	2.48915	0.0128051	0.963627	Ubiquitin carboxyl-terminal hydrolase [Source:UniProtKB/TrEMBL;Acc:G5ECC7]
WBGene00009879	F49C12.10	156.822	0.718555	0.288459	2.49101	0.0127379	0.963627
WBGene00010122	F55G11.1	29.378	-0.994469	0.399204	-2.49113	0.0127338	0.963627
WBGene00014975	Y116A8A.10	32.7017	-0.92871	0.371957	-2.49682	0.0125312	0.963627
WBGene00015292	C01C4.2	6.82684	1.89823	0.76259	2.48919	0.0128035	0.963627
WBGene00015457	C04G6.7	40.9174	-2.08243	0.835335	-2.49292	0.0126696	0.963627
WBGene00019316	K02E7.12	50.5268	-1.00112	0.402008	-2.4903	0.0127637	0.963627
WBGene00019587	K09F6.4	81.1299	0.948847	0.381218	2.48899	0.0128108	0.963627
WBGene00020285	T06A10.2	11.0082	-1.92831	0.775145	-2.48768	0.0128579	0.963968
WBGene00006497	tag-151	3884.39	0.699264	0.281245	2.48631	0.0129075	0.964842	Pre-rRNA-processing protein TSR1 homolog [Source:UniProtKB/Swiss-Prot;Acc:Q19329]
WBGene00009497	F36H1.12	6.35217	1.9981	0.805022	2.48204	0.0130633	0.965169
WBGene00010971	R01E6.7	62.1054	-0.830471	0.334581	-2.48212	0.0130603	0.965169
WBGene00021485	Y40A1A.3	32.7148	-1.06406	0.428484	-2.48331	0.0130169	0.965169
WBGene00021580	clec-174	18.1198	1.57594	0.634577	2.48345	0.0130117	0.965169	C-type LECtin [Source:UniProtKB/TrEMBL;Acc:Q9N3W8]
WBGene00010605	K06G5.1	24091	0.60059	0.242136	2.48039	0.013124	0.966705
WBGene00199692	R07H5.12	2.13133	-4.07582	1.64387	-2.47941	0.0131599	0.966705	NA
WBGene00198620	F11C7.9	1.59834	-4.22103	1.7047	-2.47612	0.013282	0.970084	NA
WBGene00235263	Y66H1A.8	14.5938	-1.77	0.714551	-2.47708	0.0132464	0.970084
WBGene00001598	glh-1	9853.09	0.711724	0.288428	2.4676	0.0136024	0.978144	ATP-dependent RNA helicase glh-1 [Source:UniProtKB/Swiss-Prot;Acc:P34689]
WBGene00011874	T20G5.13	16.7596	-1.27502	0.516494	-2.46861	0.013564	0.978144
WBGene00017849	F27B3.7	60.1597	0.865209	0.350704	2.46706	0.0136226	0.978144
WBGene00018573	oac-30	70.5059	-1.17671	0.476328	-2.47037	0.0134975	0.978144	O-ACyltransferase homolog [Source:UniProtKB/TrEMBL;Acc:P91310]
WBGene00020264	acl-8	1317.75	-0.518802	0.210064	-2.46974	0.0135213	0.978144	ACyLtransferase-like [Source:UniProtKB/TrEMBL;Acc:O16526]
WBGene00044048	F57G9.7	2.49648	-3.83388	1.55355	-2.46782	0.0135938	0.978144
WBGene00000592	coh-3	1112.71	0.763005	0.309568	2.46474	0.0137114	0.981599	COHesin family [Source:UniProtKB/TrEMBL;Acc:Q19232]
WBGene00007326	C05C9.2	22.0322	-1.3707	0.556598	-2.46264	0.0137918	0.981599
WBGene00011629	T08G11.1	5572.73	0.923202	0.375013	2.46178	0.0138248	0.981599
WBGene00014208	ZK1067.2	1291.94	1.07818	0.43787	2.46232	0.0138041	0.981599
WBGene00014772	F56D5.4	944.475	-0.558297	0.22699	-2.45956	0.0139106	0.983267
WBGene00022356	eak-3	3.32726	-3.00394	1.22152	-2.45918	0.0139254	0.983267	Enhancer of AKt-1 null [Source:UniProtKB/TrEMBL;Acc:Q9BL23]
WBGene00016120	C25H3.11	25.7854	1.33832	0.544588	2.45749	0.0139913	0.985189
WBGene00006731	uev-2	37.2025	-1.0588	0.432294	-2.44927	0.0143145	0.986302	Ubiquitin E2 (Conjugating enzyme) variant [Source:UniProtKB/TrEMBL;Acc:Q20872]
WBGene00008372	D1054.5	245.279	0.800417	0.326626	2.45056	0.0142633	0.986302
WBGene00008930	F18A11.3	327.918	-0.946317	0.385528	-2.4546	0.014104	0.986302	UPF0729 protein F18A11.3 [Source:RefSeq peptide;Acc:NP_496772]
WBGene00012953	fbxa-216	93.6524	-1.02303	0.416882	-2.45401	0.0141272	0.986302	F-box A protein [Source:UniProtKB/TrEMBL;Acc:Q9XWD4]
WBGene00017375	pbo-6	35.0266	-0.838084	0.342184	-2.44922	0.0143167	0.986302	Proton-gated ion channel subunit pbo-6 [Source:UniProtKB/Swiss-Prot;Acc:Q19351]
WBGene00020309	T07D3.6	8.173	-1.94109	0.792377	-2.44971	0.0142973	0.986302
WBGene00023067	rpl-41.1	2649.73	-1.53803	0.627145	-2.45244	0.0141893	0.986302	Ribosomal Protein, Large subunit [Source:UniProtKB/TrEMBL;Acc:A0A0M6VD87]
WBGene00202501	Y57E12B.10	10.0064	1.46563	0.596789	2.45586	0.0140549	0.986302
WBGene00013465	Y67H2A.10	1285.1	0.937741	0.383411	2.44578	0.0144538	0.990393
WBGene00020863	T27E4.5	25.3519	-1.15501	0.472163	-2.44621	0.0144369	0.990393
WBGene00016151	smc-5	3145.38	1.13089	0.462675	2.44424	0.0145157	0.99197	Structural maintenance of chromosomes protein 5 [Source:UniProtKB/Swiss-Prot;Acc:Q18237]
WBGene00000001	aap-1	2381.36	0.482571	0.469031	1.02887	0.303541	1	Phosphoinositide 3-kinase adapter subunit; Phosphoinositide kinase AdAPter subunit [Source:UniProtKB/TrEMBL;Acc:G5EDP9]
WBGene00000002	aat-1	517.979	-0.196645	0.28288	-0.695152	0.48696	1	Amino Acid Transporter [Source:UniProtKB/TrEMBL;Acc:Q19834]
WBGene00000003	aat-2	530.197	-0.371787	0.225445	-1.64913	0.0991213	1	Amino Acid Transporter [Source:UniProtKB/TrEMBL;Acc:Q19151]
WBGene00000004	aat-3	1327.1	-0.00824922	0.230994	-0.0357118	0.971512	1	Amino Acid Transporter [Source:UniProtKB/TrEMBL;Acc:O17395]
WBGene00000005	aat-4	195.226	-0.167258	0.292895	-0.57105	0.567966	1	Amino Acid Transporter [Source:UniProtKB/TrEMBL;Acc:Q7YXH5]
WBGene00000006	aat-5	525.146	-0.809365	0.425559	-1.90188	0.0571862	1	Amino Acid Transporter [Source:UniProtKB/TrEMBL;Acc:H2KZG9]
WBGene00000007	aat-6	250.421	-0.102352	0.276822	-0.369738	0.711578	1	Amino Acid Transporter [Source:UniProtKB/TrEMBL;Acc:B2D6M4]
WBGene00000008	aat-7	18.9869	0.100806	0.523985	0.192384	0.847442	1	Amino Acid Transporter [Source:UniProtKB/TrEMBL;Acc:O44832]
WBGene00000009	aat-8	40.1923	0.158549	0.609812	0.259996	0.794867	1	Amino Acid Transporter [Source:UniProtKB/TrEMBL;Acc:Q94197]
WBGene00000010	aat-9	1226.98	-0.12324	0.445293	-0.276762	0.781963	1	Amino Acid Transporter [Source:UniProtKB/TrEMBL;Acc:Q56VY0]
WBGene00000012	abf-1	5.93461	-0.738833	0.795407	-0.928873	0.352955	1	Antibacterial factor-related peptide 1 [Source:UniProtKB/Swiss-Prot;Acc:G5EGC4]
WBGene00000013	abf-2	432.615	0.301126	0.613197	0.491075	0.623373	1	Antibacterial factor-related peptide 2 [Source:UniProtKB/Swiss-Prot;Acc:G5EC68]
WBGene00000014	abf-3	1.79736	-0.999573	1.91809	-0.521129	0.602277	1	AntiBacterial Factor related [Source:UniProtKB/TrEMBL;Acc:O45563]
WBGene00000015	abf-4	14.8649	-0.66342	0.820041	-0.809008	0.41851	1	AntiBacterial Factor related [Source:UniProtKB/TrEMBL;Acc:Q9XX40]
WBGene00000016	abf-5	407.13	-0.242927	0.478557	-0.507624	0.611717	1	ABF-5; AntiBacterial Factor related [Source:UniProtKB/TrEMBL;Acc:G5EFQ2]
WBGene00000017	abf-6	377.798	-0.0632971	0.296647	-0.213375	0.831035	1	ABF-6; AntiBacterial Factor related [Source:UniProtKB/TrEMBL;Acc:G5EBS3]
WBGene00000018	abl-1	873.851	0.279002	0.321831	0.866921	0.385985	1	Tyrosine-protein kinase abl-1 [Source:UniProtKB/Swiss-Prot;Acc:P03949]
WBGene00000019	abt-1	46.0505	0.25293	0.485118	0.521378	0.602103	1	ABC Transporter family [Source:UniProtKB/TrEMBL;Acc:S6EZS3]
WBGene00000020	abt-2	658.308	-0.0568058	0.191466	-0.296689	0.766704	1	ABC Transporter family [Source:UniProtKB/TrEMBL;Acc:Q1RS86]
WBGene00000021	abt-3	5.52961	-0.049046	0.903459	-0.0542869	0.956707	1
WBGene00000022	abt-4	1139.48	0.1155	0.268255	0.430559	0.666789	1	ABC Transporter family [Source:UniProtKB/TrEMBL;Acc:Q9TXV8]
WBGene00000023	abt-5	114.97	0.370008	0.484844	0.76315	0.445374	1	ABC Transporter family [Source:UniProtKB/TrEMBL;Acc:Q9XW49]
WBGene00000024	abu-1	30.6327	-1.56376	1.05733	-1.47897	0.139147	1	Activated in Blocked Unfolded protein response [Source:UniProtKB/TrEMBL;Acc:Q17400]
WBGene00000025	abu-2	2.15575	-0.516475	1.45824	-0.354178	0.723205	1	Activated in Blocked Unfolded protein response [Source:UniProtKB/TrEMBL;Acc:Q19594]
WBGene00000026	abu-3	1.07771	-1.34276	1.84794	-0.726626	0.467455	1
WBGene00000027	abu-4	8.66111	-0.106404	0.877642	-0.121238	0.903502	1	Activated in Blocked Unfolded protein response [Source:UniProtKB/TrEMBL;Acc:Q86S74]
WBGene00000028	abu-5	0.323705	0	5.26765	0	1	1	Activated in Blocked Unfolded protein response [Source:UniProtKB/TrEMBL;Acc:Q9NF70]
WBGene00000029	abu-6	35.9178	-1.27562	1.23216	-1.03527	0.300542	1	Activated in Blocked Unfolded protein response [Source:UniProtKB/TrEMBL;Acc:O16501]
WBGene00000030	abu-7	26.7008	-1.35294	1.25524	-1.07784	0.281105	1	Activated in Blocked Unfolded protein response [Source:UniProtKB/TrEMBL;Acc:O16502]
WBGene00000031	abu-8	255.955	-0.980057	0.826097	-1.18637	0.235476	1	Activated in Blocked Unfolded protein response [Source:UniProtKB/TrEMBL;Acc:O16511]
WBGene00000033	abu-10	212.009	-1.4468	0.845885	-1.71039	0.087193	1	Activated in Blocked Unfolded protein response [Source:UniProtKB/TrEMBL;Acc:Q20002]
WBGene00000034	abu-11	303.081	-1.13583	0.850075	-1.33616	0.181498	1	Activated in Blocked Unfolded protein response [Source:UniProtKB/TrEMBL;Acc:P91419]
WBGene00000035	ace-1	295.721	0.137726	0.323111	0.426249	0.669926	1	Acetylcholinesterase 1 [Source:UniProtKB/Swiss-Prot;Acc:P38433]
WBGene00000036	ace-2	427.129	-0.565365	0.413203	-1.36825	0.171233	1	Carboxylic ester hydrolase [Source:UniProtKB/TrEMBL;Acc:G5EDV9]
WBGene00000037	ace-3	125.637	-0.25321	0.277396	-0.912812	0.361341	1	Carboxylic ester hydrolase [Source:UniProtKB/TrEMBL;Acc:Q9U295]
WBGene00000038	ace-4	40.2334	-0.353	0.531852	-0.663719	0.50687	1	Carboxylic ester hydrolase [Source:UniProtKB/TrEMBL;Acc:G5EDN1]
WBGene00000039	acn-1	2160.68	-0.468508	0.448274	-1.04514	0.295959	1	Inactive angiotensin-converting enzyme-related protein [Source:UniProtKB/Swiss-Prot;Acc:Q18581]
WBGene00000040	aco-1	5726.53	-0.123195	0.211794	-0.581675	0.560786	1	Probable cytoplasmic aconitate hydratase [Source:UniProtKB/Swiss-Prot;Acc:Q23500]
WBGene00000041	aco-2	12726.6	0.325179	0.221167	1.47029	0.141484	1	Probable aconitate hydratase, mitochondrial [Source:UniProtKB/Swiss-Prot;Acc:P34455]
WBGene00000042	acr-2	51.4993	-0.552056	0.436102	-1.26589	0.205554	1	Acetylcholine receptor subunit beta-type acr-2 [Source:UniProtKB/Swiss-Prot;Acc:P48182]
WBGene00000043	acr-3	22.5109	-0.761486	0.556171	-1.36916	0.17095	1	Acetylcholine receptor subunit beta-type acr-3 [Source:UniProtKB/Swiss-Prot;Acc:Q93149]
WBGene00000044	acr-5	42.5694	-0.531726	0.469287	-1.13305	0.257193	1	Acetylcholine receptor subunit alpha-type acr-5 [Source:UniProtKB/Swiss-Prot;Acc:P54246]
WBGene00000045	acr-6	6.48032	0.322929	0.708079	0.456063	0.648345	1	AcetylCholine Receptor [Source:UniProtKB/TrEMBL;Acc:Q9N4M3]
WBGene00000046	acr-7	19.0965	-0.14046	0.431379	-0.325607	0.744722	1	Acetylcholine receptor subunit alpha-type acr-7 [Source:UniProtKB/Swiss-Prot;Acc:P45963]
WBGene00000047	acr-8	104.589	-0.442333	0.426175	-1.03791	0.29931	1	AcetylCholine Receptor [Source:UniProtKB/TrEMBL;Acc:Q23355]
WBGene00000048	acr-9	37.7631	-0.43996	0.471157	-0.933786	0.350414	1	AcetylCholine Receptor [Source:UniProtKB/TrEMBL;Acc:Q18556]
WBGene00000049	acr-10	19.5564	-0.0343409	0.537471	-0.0638936	0.949055	1	AcetylCholine Receptor [Source:UniProtKB/TrEMBL;Acc:Q21645]
WBGene00000050	acr-11	46.1448	-0.422154	0.329596	-1.28082	0.200256	1	AcetylCholine Receptor [Source:UniProtKB/TrEMBL;Acc:P91197]
WBGene00000051	acr-12	150.62	-0.238211	0.360744	-0.660333	0.50904	1	AcetylCholine Receptor; Nicotinic acetylcholine receptor-like subunit ACR-12 [Source:UniProtKB/TrEMBL;Acc:G5EDF1]
WBGene00000053	acr-14	22.729	-0.170267	0.534004	-0.318851	0.74984	1	AcetylCholine Receptor [Source:UniProtKB/TrEMBL;Acc:Q22224]
WBGene00000054	acr-15	101.346	0.187714	0.391259	0.47977	0.631391	1	AcetylCholine Receptor [Source:UniProtKB/TrEMBL;Acc:O16926]
WBGene00000055	acr-16	151.491	-0.283787	0.278064	-1.02058	0.307452	1	Acetylcholine receptor subunit alpha-type acr-16 [Source:UniProtKB/Swiss-Prot;Acc:P48180]
WBGene00000056	acr-17	90.0147	-0.0904515	0.301728	-0.299778	0.764347	1	AcetylCholine Receptor [Source:UniProtKB/TrEMBL;Acc:Q6F6K3]
WBGene00000057	acr-18	88.8245	0.127024	0.402196	0.315826	0.752135	1	AcetylCholine Receptor; Acetylcholine receptor, one of nine alpha a7-like nicotinic acetylcholine receptor subunits (58.6 kD) (Acr-18) [Source:UniProtKB/TrEMBL;Acc:G5EG72]
WBGene00000058	acr-19	45.2065	0.0369648	0.367013	0.100718	0.919774	1	AcetylCholine Receptor; Acetylcholine receptor (63.2 kD) (Acr-19) [Source:UniProtKB/TrEMBL;Acc:G5EGB5]
WBGene00000059	acr-20	83.6328	-0.400016	0.272272	-1.46918	0.141785	1	AcetylCholine Receptor [Source:UniProtKB/TrEMBL;Acc:Q7JKI4]
WBGene00000060	acr-21	18.401	-0.175017	0.657239	-0.266292	0.790014	1	AcetylCholine Receptor [Source:UniProtKB/TrEMBL;Acc:Q9N5U8]
WBGene00000061	lgc-11	35.1501	-0.066589	0.524603	-0.126932	0.898994	1	Acetylcholine receptor (51.1 kD) (Acr-22); Ligand-Gated ion Channel [Source:UniProtKB/TrEMBL;Acc:G5EGR1]
WBGene00000062	acr-23	36.2246	-0.347269	0.514974	-0.674343	0.500093	1	Betaine receptor acr-23 [Source:UniProtKB/Swiss-Prot;Acc:G5EG88]
WBGene00000063	act-1	7903.46	0.240611	0.467973	0.514155	0.607144	1	Actin-1 [Source:UniProtKB/Swiss-Prot;Acc:P0DM41]
WBGene00000064	act-2	20709	0.119392	0.258093	0.462594	0.643655	1	Actin-2 [Source:UniProtKB/Swiss-Prot;Acc:P10984]
WBGene00000065	act-3	12811	-0.0760932	0.393255	-0.193496	0.846571	1	Actin-1 [Source:UniProtKB/Swiss-Prot;Acc:P0DM41]
WBGene00000066	act-4	34551.2	-0.245277	0.361344	-0.678793	0.497269	1	Actin-4 [Source:UniProtKB/Swiss-Prot;Acc:P10986]
WBGene00000067	act-5	22140.5	-0.290312	0.472154	-0.614868	0.538642	1	ACTin [Source:UniProtKB/TrEMBL;Acc:O45815]
WBGene00000068	acy-1	261.815	0.12464	0.289648	0.430316	0.666966	1	Adenylyl CYclase [Source:UniProtKB/TrEMBL;Acc:Q19523]
WBGene00000069	acy-2	60.068	-0.116394	0.364316	-0.319487	0.749357	1	Adenylyl CYclase [Source:UniProtKB/TrEMBL;Acc:O16880]
WBGene00000070	acy-3	356.74	0.0731865	0.277561	0.263678	0.792028	1	Adenylyl CYclase [Source:UniProtKB/TrEMBL;Acc:G5EE33]
WBGene00000071	acy-4	161.889	0.364245	0.405521	0.898214	0.369072	1	Adenylyl CYclase [Source:UniProtKB/TrEMBL;Acc:Q966F9]
WBGene00000072	add-1	304.54	-0.0218807	0.21941	-0.0997253	0.920562	1	Adducin-related protein 1 [Source:UniProtKB/Swiss-Prot;Acc:Q9U9K0]
WBGene00000073	add-2	581.809	0.298899	0.194013	1.54061	0.123411	1	Adducin-related protein 2 [Source:UniProtKB/Swiss-Prot;Acc:Q20952]
WBGene00000074	adm-2	868.656	0.417603	0.332662	1.25534	0.209357	1	ADAM (Disintegrin plus metalloprotease) family [Source:UniProtKB/TrEMBL;Acc:G5EDW5]
WBGene00000075	adm-4	851.32	0.00635665	0.258921	0.0245506	0.980413	1	ADAM (Disintegrin plus metalloprotease) family [Source:UniProtKB/TrEMBL;Acc:Q94316]
WBGene00000079	adr-1	1197.79	0.654941	0.552752	1.18487	0.236068	1	Adenosine Deaminase acting on RNA; Truncated ADR-1F [Source:UniProtKB/TrEMBL;Acc:G5EG30]
WBGene00000080	adr-2	2662.55	0.281241	0.329557	0.853392	0.393442	1	Probable double-stranded RNA-specific adenosine deaminase [Source:UniProtKB/Swiss-Prot;Acc:Q22618]
WBGene00000081	ads-1	4453.76	0.000245015	0.331397	0.000739339	0.99941	1	Alkyldihydroxyacetonephosphate synthase [Source:UniProtKB/Swiss-Prot;Acc:O45218]
WBGene00000082	adt-1	115.022	-0.750574	0.455123	-1.64917	0.0991132	1	ADAMTS family; ADT-1 [Source:UniProtKB/TrEMBL;Acc:G5ECS8]
WBGene00000083	adt-2	1597.12	0.0668773	0.231161	0.28931	0.772344	1	ADAMTS family; ADAMTS-like protease [Source:UniProtKB/TrEMBL;Acc:Q19204]
WBGene00000084	aex-1	205.152	0.57903	0.341524	1.69543	0.0899936	1	C2 domain-containing protein aex-1 [Source:UniProtKB/Swiss-Prot;Acc:G5EEU3]
WBGene00000085	aex-2	48.5626	0.0478927	0.42061	0.113865	0.909345	1	G-protein coupled receptor aex-2 [Source:UniProtKB/Swiss-Prot;Acc:G5ECD9]
WBGene00000086	aex-3	322.716	0.351673	0.202611	1.7357	0.0826161	1	MAP kinase-activating death domain protein [Source:UniProtKB/Swiss-Prot;Acc:O02626]
WBGene00000088	aex-5	434.084	0.114042	0.251158	0.454067	0.649781	1	Endoprotease aex-5 [Source:UniProtKB/Swiss-Prot;Acc:P91863]
WBGene00000089	aex-6	363.902	-0.169722	0.37819	-0.448774	0.653594	1	Rab27 [Source:UniProtKB/TrEMBL;Acc:G5EBS5]
WBGene00000090	age-1	1425.38	0.774257	0.529817	1.46137	0.143915	1	Phosphatidylinositol 3-kinase age-1 [Source:UniProtKB/Swiss-Prot;Acc:Q94125]
WBGene00000092	ags-3	1418.27	-0.11006	0.206573	-0.532788	0.59418	1	Activator of G protein Signalling [Source:UniProtKB/TrEMBL;Acc:Q19955]
WBGene00000093	agt-1	1336.63	0.277173	0.322668	0.859004	0.390338	1	AlkylGuanine DNA alkylTransferase [Source:UniProtKB/TrEMBL;Acc:Q2HQK2]
WBGene00000094	agt-2	514.379	0.660097	0.499123	1.32251	0.185997	1	AlkylGuanine DNA alkylTransferase [Source:UniProtKB/TrEMBL;Acc:Q19263]
WBGene00000095	aha-1	484.574	-0.00492771	0.347526	-0.0141794	0.988687	1	Aryl hydrocarbon receptor nuclear translocator homolog [Source:UniProtKB/Swiss-Prot;Acc:O02219]
WBGene00000096	ahr-1	24.1314	0.751787	0.633107	1.18746	0.235048	1	Aryl hydrocarbon receptor protein 1 [Source:UniProtKB/Swiss-Prot;Acc:O44712]
WBGene00000097	aip-1	2079.16	-0.334913	0.206701	-1.62028	0.105173	1	Arsenite Inducible Protein [Source:UniProtKB/TrEMBL;Acc:Q9XUW8]
WBGene00000098	air-1	5674.99	0.0938593	0.409232	0.229355	0.818593	1	Aurora/Ipl1 Related kinase; Aurora/Ipl1-related protein kinase 1 [Source:UniProtKB/TrEMBL;Acc:G5EDL3]
WBGene00000099	air-2	3020.29	0.115156	0.32398	0.355441	0.722259	1	Aurora/IPL1-related protein kinase 2 [Source:UniProtKB/Swiss-Prot;Acc:O01427]
WBGene00000100	ajm-1	1931.7	0.445765	0.253912	1.75559	0.0791587	1	Apical Junction Molecule [Source:UniProtKB/TrEMBL;Acc:A0A1C3NSM8]
WBGene00000101	aka-1	4570.97	0.767969	0.494333	1.55355	0.120293	1	A Kinase Anchor protein; A kinase anchor protein [Source:UniProtKB/TrEMBL;Acc:Q18930]
WBGene00000102	akt-1	4864.45	0.418898	0.5022	0.834126	0.40421	1	Serine/threonine-protein kinase akt-1 [Source:UniProtKB/Swiss-Prot;Acc:Q17941]
WBGene00000103	akt-2	1165.92	0.000793882	0.243742	0.00325705	0.997401	1	Serine/threonine-protein kinase akt-2 [Source:UniProtKB/Swiss-Prot;Acc:Q9XTG7]
WBGene00000105	alg-1	1562.59	-0.0916061	0.160848	-0.56952	0.569003	1	Argonaute-like [Source:UniProtKB/TrEMBL;Acc:Q3LTR7]
WBGene00000106	alg-2	4550.02	-0.02417	0.236212	-0.102323	0.9185	1
WBGene00000107	alh-1	9662.37	0.129885	0.221001	0.587715	0.556724	1	ALdehyde deHydrogenase [Source:UniProtKB/TrEMBL;Acc:Q8IG19]
WBGene00000108	alh-2	7.76007	-0.301591	1.01393	-0.297449	0.766124	1	ALdehyde deHydrogenase [Source:UniProtKB/TrEMBL;Acc:Q9TXM0]
WBGene00000109	alh-3	2107.68	-0.0582713	0.267714	-0.217663	0.827692	1	10-formyltetrahydrofolate dehydrogenase [Source:UniProtKB/TrEMBL;Acc:G5ECV9]
WBGene00000110	alh-4	4055.38	-0.0363836	0.208087	-0.174848	0.861199	1	Aldehyde dehydrogenase [Source:UniProtKB/TrEMBL;Acc:Q8MXJ7]
WBGene00000111	alh-5	212.405	-0.232567	0.497592	-0.467385	0.640224	1	Aldehyde dehydrogenase [Source:UniProtKB/TrEMBL;Acc:O44555]
WBGene00000112	alh-6	2630.55	-0.154788	0.440529	-0.351368	0.725312	1	ALdehyde deHydrogenase [Source:UniProtKB/TrEMBL;Acc:Q6A593]
WBGene00000113	alh-7	1428.63	-0.349189	0.449236	-0.777295	0.436985	1	ALdehyde deHydrogenase [Source:UniProtKB/TrEMBL;Acc:O02266]
WBGene00000114	alh-8	20589	-0.160287	0.44	-0.36429	0.715642	1	Probable methylmalonate-semialdehyde dehydrogenase [acylating], mitochondrial [Source:UniProtKB/Swiss-Prot;Acc:P52713]
WBGene00000115	alh-9	4243.67	0.157554	0.374921	0.420233	0.674315	1	Putative aldehyde dehydrogenase family 7 member A1 homolog [Source:UniProtKB/Swiss-Prot;Acc:P46562]
WBGene00000116	alh-10	724.132	-0.0472967	0.270398	-0.174915	0.861146	1	ALdehyde deHydrogenase [Source:UniProtKB/TrEMBL;Acc:Q18822]
WBGene00000117	alh-11	1308.55	0.257952	0.255768	1.00854	0.313195	1	ALdehyde deHydrogenase [Source:UniProtKB/TrEMBL;Acc:Q20352]
WBGene00000118	alh-12	1570.74	0.18394	0.227061	0.810088	0.41789	1	ALdehyde deHydrogenase [Source:UniProtKB/TrEMBL;Acc:Q7Z1Q3]
WBGene00000120	aly-1	4765.99	0.366268	0.289354	1.26581	0.20558	1	Ref/ALY RNA export adaptor family [Source:UniProtKB/TrEMBL;Acc:Q17561]
WBGene00000121	aly-2	8180.19	0.278599	0.352536	0.790272	0.429369	1	Ref/ALY RNA export adaptor family [Source:UniProtKB/TrEMBL;Acc:O62183]
WBGene00000122	aly-3	7514.99	-0.408921	0.183692	-2.22612	0.0260059	1	Ref/ALY RNA export adaptor family [Source:UniProtKB/TrEMBL;Acc:Q21559]
WBGene00000123	ama-1	8888.75	0.210227	0.203862	1.03122	0.302438	1	DNA-directed RNA polymerase II subunit RPB1 [Source:UniProtKB/Swiss-Prot;Acc:P16356]
WBGene00000133	amt-1	73.5994	0.504314	0.608756	0.828433	0.407425	1	Putative ammonium transporter 1 [Source:UniProtKB/Swiss-Prot;Acc:P54145]
WBGene00000134	amt-2	26.0984	-1.02369	0.471307	-2.17202	0.0298541	1	Putative ammonium transporter 2 [Source:UniProtKB/Swiss-Prot;Acc:Q20605]
WBGene00000135	amt-3	87.9732	-0.0271673	0.336718	-0.0806827	0.935694	1	Putative ammonium transporter 3 [Source:UniProtKB/Swiss-Prot;Acc:Q21565]
WBGene00000136	amt-4	590.85	-0.303705	0.469297	-0.647149	0.517536	1	Ammonium transporter [Source:UniProtKB/TrEMBL;Acc:Q17663]
WBGene00000137	amx-1	747.09	0.196631	0.207555	0.947364	0.343453	1	Amine oxidase family member 1 [Source:UniProtKB/Swiss-Prot;Acc:Q21988]
WBGene00000138	amx-2	429.734	-0.118065	0.24847	-0.475167	0.634668	1	AMine oXidase family [Source:UniProtKB/TrEMBL;Acc:Q9XXU5]
WBGene00000139	amx-3	180.464	0.105809	0.186693	0.566753	0.570882	1	AMine oXidase family [Source:UniProtKB/TrEMBL;Acc:E0AHD3]
WBGene00000142	aos-1	4230.59	0.13308	0.310129	0.429111	0.667843	1	SUMO-activating enzyme subunit aos-1 [Source:UniProtKB/Swiss-Prot;Acc:Q17820]
WBGene00000143	apc-2	1720.8	0.388729	0.358902	1.0831	0.278762	1	Anaphase-promoting complex subunit 2 [Source:UniProtKB/Swiss-Prot;Acc:P34514]
WBGene00000144	apc-10	773.86	0.00375712	0.275924	0.0136165	0.989136	1	Anaphase-promoting complex subunit 10 [Source:UniProtKB/Swiss-Prot;Acc:H2L2B8]
WBGene00000145	apc-11	1313.04	-0.211229	0.201491	-1.04833	0.294485	1	Anaphase-promoting complex subunit 11 [Source:UniProtKB/Swiss-Prot;Acc:Q20052]
WBGene00000146	ape-1	4192.21	0.265842	0.408282	0.651125	0.514966	1	Apoptotic enhancer 1 protein [Source:UniProtKB/Swiss-Prot;Acc:Q9XVN3]
WBGene00000147	aph-1	1503.81	-0.0697283	0.253262	-0.275321	0.78307	1	Gamma-secretase subunit aph-1 [Source:UniProtKB/Swiss-Prot;Acc:O45876]
WBGene00000148	aph-2	1686.2	0.404056	0.381053	1.06037	0.288978	1	Nicastrin [Source:UniProtKB/Swiss-Prot;Acc:Q23316]
WBGene00000149	apl-1	7380.21	0.340539	0.268941	1.26622	0.205434	1	Beta-amyloid-like protein [Source:UniProtKB/Swiss-Prot;Acc:Q10651]
WBGene00000150	apm-1	1467.63	-0.122392	0.193152	-0.633658	0.526304	1	AdaPtin, Mu/medium chain (Clathrin associated complex) [Source:UniProtKB/TrEMBL;Acc:O01755]
WBGene00000151	apn-1	1510.85	0.79655	0.463303	1.71928	0.0855625	1	DNA-(apurinic or apyrimidinic site) lyase [Source:UniProtKB/Swiss-Prot;Acc:Q10002]
WBGene00000155	app-1	5663.71	-0.04106	0.249261	-0.164727	0.869159	1	Xaa-Pro aminopeptidase app-1 [Source:UniProtKB/Swiss-Prot;Acc:O44750]
WBGene00000156	2001-04-01	2493.34	0.632555	0.478084	1.3231	0.185801	1	Adenomatous polyposis coli protein-related protein 1 [Source:UniProtKB/Swiss-Prot;Acc:Q21227]
WBGene00000157	aps-2	1576.99	-0.255473	0.32225	-0.792779	0.427907	1	AdaPtin, Small chain (Clathrin associated complex) [Source:UniProtKB/TrEMBL;Acc:Q19123]
WBGene00000158	apg-1	3466.58	0.19859	0.236861	0.838424	0.401793	1	AdaPtin, Gamma chain (Clathrin associated complex) [Source:UniProtKB/TrEMBL;Acc:Q8WQB3]
WBGene00000159	aps-1	1898.11	-0.117667	0.19474	-0.604224	0.545695	1	AdaPtin, Small chain (Clathrin associated complex) [Source:UniProtKB/TrEMBL;Acc:O16369]
WBGene00000160	apb-1	2854.57	0.195304	0.334942	0.583097	0.559828	1	AP complex subunit beta [Source:UniProtKB/TrEMBL;Acc:Q9N4F3]
WBGene00000161	apa-2	2164.08	0.116504	0.258243	0.451142	0.651887	1	AdaPtin, Alpha chain (Clathrin associated complex) [Source:UniProtKB/TrEMBL;Acc:Q22601]
WBGene00000162	apd-3	2520.72	0.444283	0.234274	1.89643	0.0579038	1	AP-3 complex subunit delta [Source:UniProtKB/TrEMBL;Acc:Q95X88]
WBGene00000163	apb-3	3355.64	0.491835	0.478355	1.02818	0.303865	1	AP-3 complex subunit beta [Source:UniProtKB/TrEMBL;Acc:O45718]
WBGene00000164	apm-3	1127.24	-0.0238888	0.192393	-0.124167	0.901183	1	AdaPtin, Mu/medium chain (Clathrin associated complex) [Source:UniProtKB/TrEMBL;Acc:Q20736]
WBGene00000165	aps-3	2192.51	-0.512609	0.549191	-0.93339	0.350619	1	AdaPtin, Small chain (Clathrin associated complex) [Source:UniProtKB/TrEMBL;Acc:Q8T874]
WBGene00000166	apt-9	47.0188	0.0910802	0.478073	0.190515	0.848906	1	AdaPTin or adaptin-related protein [Source:UniProtKB/TrEMBL;Acc:Q23165]
WBGene00000168	apx-1	3401.36	-0.295997	0.360629	-0.82078	0.411771	1	Anterior pharynx in excess protein 1 [Source:UniProtKB/Swiss-Prot;Acc:P41990]
WBGene00000169	aqp-1	2006.25	0.354299	0.583901	0.606778	0.543998	1	AQuaPorin or aquaglyceroporin related [Source:UniProtKB/TrEMBL;Acc:Q8IG23]
WBGene00000170	aqp-2	5368.95	0.00346529	0.342898	0.0101059	0.991937	1	AQuaPorin or aquaglyceroporin related [Source:UniProtKB/TrEMBL;Acc:Q17571]
WBGene00000171	aqp-3	33.258	0.840423	0.606839	1.38492	0.166077	1	AQuaPorin or aquaglyceroporin related [Source:UniProtKB/TrEMBL;Acc:A0A061ADS9]
WBGene00000172	aqp-4	712.38	-0.383326	0.5278	-0.726272	0.467672	1	AQuaPorin or aquaglyceroporin related [Source:UniProtKB/TrEMBL;Acc:G5EEK0]
WBGene00000173	aqp-5	15.7515	-0.681474	0.571755	-1.1919	0.233301	1	AQuaPorin or aquaglyceroporin related [Source:UniProtKB/TrEMBL;Acc:Q18469]
WBGene00000174	aqp-6	98.6733	-0.224716	0.314477	-0.71457	0.474875	1	AQuaPorin or aquaglyceroporin related [Source:UniProtKB/TrEMBL;Acc:D5MCS1]
WBGene00000175	aqp-7	2916.81	-0.131779	0.462155	-0.285141	0.775536	1	AQuaPorin or aquaglyceroporin related [Source:UniProtKB/TrEMBL;Acc:Q21473]
WBGene00000176	aqp-8	904.317	-0.361702	0.683888	-0.52889	0.596882	1	AQuaPorin or aquaglyceroporin related [Source:UniProtKB/TrEMBL;Acc:Q7Z138]
WBGene00000177	aqp-9	216.54	-0.0378483	0.31099	-0.121703	0.903134	1	AQuaPorin or aquaglyceroporin related [Source:UniProtKB/TrEMBL;Acc:E5QCH4]
WBGene00000178	aqp-10	2223.06	-0.592018	0.418375	-1.41504	0.157057	1	Putative aquaporin-10 [Source:UniProtKB/Swiss-Prot;Acc:Q09369]
WBGene00000179	aqp-11	1840.11	-0.0426262	0.496874	-0.0857888	0.931634	1	Aquaporin [Source:UniProtKB/TrEMBL;Acc:O46024]
WBGene00000180	arc-1	727.092	-0.165606	0.240588	-0.688338	0.49124	1	E3 ubiquitin-protein ligase arc-1 [Source:UniProtKB/Swiss-Prot;Acc:Q09654]
WBGene00000181	ard-1	6501.82	0.000995791	0.378011	0.00263429	0.997898	1	Alcohol/Ribitol Dehydrogenase family [Source:UniProtKB/TrEMBL;Acc:Q19102]
WBGene00000182	arf-1.2	15524.3	-0.0259639	0.293993	-0.0883146	0.929627	1	ADP-ribosylation factor 1-like 2 [Source:UniProtKB/Swiss-Prot;Acc:Q10943]
WBGene00000183	arf-3	13977.5	-0.127165	0.241197	-0.527227	0.598036	1	ADP-Ribosylation Factor related; ADP-ribosylation factor related (20.5 kD) (Arf-3) [Source:UniProtKB/TrEMBL;Acc:G5EFK4]
WBGene00000184	arf-6	1401.42	-0.319713	0.240182	-1.33113	0.183146	1	ADP-Ribosylation Factor related [Source:UniProtKB/TrEMBL;Acc:Q9U2S4]
WBGene00000185	arg-1	57.2009	-0.0832279	0.505471	-0.164654	0.869216	1	Delta-like protein [Source:UniProtKB/TrEMBL;Acc:Q7JNV6]
WBGene00000186	ark-1	1395.65	0.446712	0.322267	1.38615	0.1657	1	Ack-related non-receptor tyrosine kinase [Source:UniProtKB/Swiss-Prot;Acc:G5EBZ8]
WBGene00000187	arl-1	2318.98	0.0796503	0.211686	0.376266	0.706719	1	ADP-ribosylation factor-like protein 1 [Source:UniProtKB/Swiss-Prot;Acc:Q20758]
WBGene00000188	arl-3	39.4494	-0.669708	0.423828	-1.58014	0.114075	1	ADP-ribosylation factor-like protein 3 [Source:UniProtKB/Swiss-Prot;Acc:O45379]
WBGene00000189	arl-5	816.981	-0.0501096	0.289951	-0.172821	0.862792	1	ADP-ribosylation factor-like protein 5 [Source:UniProtKB/Swiss-Prot;Acc:P34212]
WBGene00000190	arf-1.1	113.733	-0.434213	0.516272	-0.841055	0.400317	1	ADP-ribosylation factor 1-like 1 [Source:UniProtKB/Swiss-Prot;Acc:Q94231]
WBGene00000191	arl-7	62.0082	-0.979806	0.44863	-2.18399	0.0289627	1
WBGene00000192	arl-8	5625.15	0.098015	0.26289	0.372836	0.70927	1	ARF-Like; Novel small G protein indispensable for equal chromosome segregation [Source:UniProtKB/TrEMBL;Acc:G5EDC6]
WBGene00000193	arl-6	12.7625	-0.157143	0.52548	-0.299046	0.764905	1	ADP-ribosylation factor-like protein 6 [Source:UniProtKB/Swiss-Prot;Acc:Q18510]
WBGene00000195	arr-1	980.444	-0.106485	0.193499	-0.550312	0.582106	1	Probable beta-arrestin [Source:UniProtKB/Swiss-Prot;Acc:P51485]
WBGene00000196	aars-1	715.429	0.567182	0.417058	1.35996	0.173843	1	Alanine--tRNA ligase, mitochondrial [Source:UniProtKB/Swiss-Prot;Acc:Q23122]
WBGene00000197	aars-2	11285.9	0.0569437	0.223511	0.25477	0.798901	1	Alanine--tRNA ligase, cytoplasmic [Source:UniProtKB/Swiss-Prot;Acc:O01541]
WBGene00000198	art-1	5976.5	0.00598579	0.164468	0.0363949	0.970967	1	Probable very-long-chain enoyl-CoA reductase art-1 [Source:UniProtKB/Swiss-Prot;Acc:Q9N5Y2]
WBGene00000199	arx-1	4805.19	-0.0809295	0.171073	-0.47307	0.636163	1	Actin-related protein 3 [Source:UniProtKB/Swiss-Prot;Acc:Q9N4I0]
WBGene00000200	arx-2	5275.33	0.0873869	0.266549	0.327846	0.743028	1	Actin-related protein 2 [Source:UniProtKB/Swiss-Prot;Acc:P53489]
WBGene00000201	arx-3	4487.3	-0.374671	0.255171	-1.46832	0.142018	1	ARp2/3 compleX component [Source:UniProtKB/TrEMBL;Acc:Q9U1R7]
WBGene00000202	exos-4.2	1775.59	0.160237	0.326054	0.491443	0.623113	1	EXOSome (Multiexonuclease complex) component [Source:UniProtKB/TrEMBL;Acc:Q9N4P9]
WBGene00000203	arx-5	2859.33	-0.247849	0.323115	-0.76706	0.443046	1	Probable actin-related protein 2/3 complex subunit 3 [Source:UniProtKB/Swiss-Prot;Acc:Q9XWV3]
WBGene00000204	arx-6	2573.45	-0.347688	0.212914	-1.633	0.102469	1	Probable actin-related protein 2/3 complex subunit 4 [Source:UniProtKB/Swiss-Prot;Acc:P58798]
WBGene00000205	arx-7	2542.25	-0.173546	0.334183	-0.519313	0.603543	1	Actin-related protein 2/3 complex subunit 5 [Source:UniProtKB/TrEMBL;Acc:O61861]
WBGene00000206	asb-1	9634.16	0.136478	0.254024	0.537263	0.591086	1	ATP Synthase B homolog [Source:UniProtKB/TrEMBL;Acc:Q20053]
WBGene00000207	asb-2	9641.13	-0.423078	0.469996	-0.900173	0.368028	1	ATP Synthase B homolog [Source:UniProtKB/TrEMBL;Acc:Q19126]
WBGene00000208	asc-1	3352.07	-0.0328948	0.197461	-0.166588	0.867694	1	ASC-1; Activating Signal Cointegrator homolog [Source:UniProtKB/TrEMBL;Acc:G5EDK1]
WBGene00000209	asg-1	8152.69	-0.336318	0.472635	-0.711582	0.476724	1	Probable ATP synthase subunit g 1, mitochondrial [Source:UniProtKB/Swiss-Prot;Acc:P90921]
WBGene00000210	asg-2	4255.31	-0.902991	0.584216	-1.54565	0.12219	1	Probable ATP synthase subunit g 2, mitochondrial [Source:UniProtKB/Swiss-Prot;Acc:Q18803]
WBGene00000211	asm-1	331.698	0.254611	0.434441	0.586064	0.557832	1	Sphingomyelin phosphodiesterase 1 [Source:UniProtKB/Swiss-Prot;Acc:Q10916]
WBGene00000212	asm-2	394.021	0.185304	0.529987	0.349639	0.72661	1	Sphingomyelin phosphodiesterase 2 [Source:UniProtKB/Swiss-Prot;Acc:Q23498]
WBGene00000213	asm-3	171.445	0.635765	0.520173	1.22222	0.221625	1	Putative sphingomyelin phosphodiesterase asm-3 [Source:UniProtKB/Swiss-Prot;Acc:Q9UAY4]
WBGene00000214	asp-1	91515.4	-0.72387	0.776955	-0.931676	0.351504	1	ASpartyl Protease; Aspartic protease 1 [Source:UniProtKB/TrEMBL;Acc:G5EEI4]
WBGene00000215	asp-2	17488.2	0.0958444	0.393942	0.243296	0.807776	1	ASpartyl Protease [Source:UniProtKB/TrEMBL;Acc:Q86NE1]
WBGene00000216	asp-3	37719.6	-0.0150342	0.442337	-0.0339881	0.972887	1	Aspartic protease 3 [Source:UniProtKB/Swiss-Prot;Acc:P55956]
WBGene00000217	asp-4	26599.5	0.363539	0.295165	1.23165	0.218081	1	ASpartyl Protease [Source:UniProtKB/TrEMBL;Acc:Q21966]
WBGene00000218	asp-5	28458.4	-0.123848	0.492048	-0.2517	0.801273	1	ASpartyl Protease [Source:UniProtKB/TrEMBL;Acc:O01532]
WBGene00000219	asp-6	59639.5	-0.281463	0.516722	-0.544708	0.585954	1	Aspartic protease 6 [Source:UniProtKB/Swiss-Prot;Acc:O01530]
WBGene00000220	atf-2	289.972	-0.181677	0.287843	-0.631167	0.527931	1	ATF (cAMP-dependent transcription factor) family [Source:UniProtKB/TrEMBL;Acc:Q21361]
WBGene00000221	atf-5	2459.32	-0.517102	0.275966	-1.87379	0.0609593	1	ATF (cAMP-dependent transcription factor) family [Source:UniProtKB/TrEMBL;Acc:Q22156]
WBGene00000222	atf-6	702.124	0.356869	0.291491	1.22429	0.220844	1	ATF (cAMP-dependent transcription factor) family [Source:UniProtKB/TrEMBL;Acc:Q20435]
WBGene00000223	atf-7	6280.41	0.325675	0.315153	1.03339	0.301423	1	ATF (cAMP-dependent transcription factor) family [Source:UniProtKB/TrEMBL;Acc:B3GWA6]
WBGene00000224	atgp-1	1184.85	-0.0370619	0.288875	-0.128297	0.897914	1	Amino acid Transporter GlycoProtein subunit [Source:UniProtKB/TrEMBL;Acc:Q9XVU3]
WBGene00000225	atgp-2	829.36	-0.0746979	0.264193	-0.28274	0.777376	1	Amino acid Transporter GlycoProtein subunit [Source:UniProtKB/TrEMBL;Acc:G1K110]
WBGene00000226	atl-1	1744.56	0.960626	0.436337	2.20157	0.0276958	1	Serine/threonine-protein kinase ATR [Source:UniProtKB/Swiss-Prot;Acc:Q22258]
WBGene00000227	atm-1	1236.38	0.25115	0.258849	0.970257	0.331918	1	Serine/threonine-protein kinase ATM [Source:UniProtKB/Swiss-Prot;Acc:Q9N3Q4]
WBGene00000228	atn-1	3604.75	0.00531208	0.229722	0.023124	0.981551	1	AcTiniN [Source:UniProtKB/TrEMBL;Acc:H2L2C8]
WBGene00000229	atp-2	48544.8	-0.0471219	0.19939	-0.236331	0.813176	1	ATP synthase subunit beta, mitochondrial [Source:UniProtKB/Swiss-Prot;Acc:P46561]
WBGene00000230	atp-3	17332.6	-0.326169	0.260675	-1.25124	0.210845	1	ATP synthase subunit [Source:UniProtKB/TrEMBL;Acc:Q7JNG1]
WBGene00000231	atx-2	6312.1	0.416959	0.220751	1.88882	0.0589162	1	Ataxin-2 homolog [Source:UniProtKB/Swiss-Prot;Acc:G5ED29]
WBGene00000232	avr-14	229.992	0.0709196	0.290778	0.243896	0.807311	1	Inhibitory amino acid receptor subunit gbr-2A [Source:UniProtKB/TrEMBL;Acc:Q17367]
WBGene00000233	avr-15	268.905	0.530306	0.481792	1.10069	0.27103	1	GluClalpha2B protein [Source:UniProtKB/TrEMBL;Acc:O17548]
WBGene00000235	baf-1	12948.7	-0.0211102	0.321641	-0.0656328	0.94767	1	Barrier-to-autointegration factor 1 [Source:UniProtKB/Swiss-Prot;Acc:Q03565]
WBGene00000236	bag-1	1667.17	0.00209301	0.294651	0.00710337	0.994332	1	BAG family molecular chaperone regulator 1 [Source:UniProtKB/Swiss-Prot;Acc:O44739]
WBGene00000237	bam-2	993.837	0.143441	0.242715	0.590987	0.554529	1	BAM-2 [Source:UniProtKB/TrEMBL;Acc:G5ECL4]
WBGene00000238	bar-1	408.262	0.108519	0.262978	0.412656	0.679859	1	Beta-catenin/armadillo-related protein 1 [Source:UniProtKB/Swiss-Prot;Acc:Q18825]
WBGene00000239	bas-1	637.496	-0.0316076	0.25277	-0.125045	0.900488	1	Biogenic Amine Synthesis related [Source:UniProtKB/TrEMBL;Acc:O45137]
WBGene00000240	pah-1	1509.54	-0.210701	0.268969	-0.783365	0.433413	1	Probable phenylalanine-4-hydroxylase 1 [Source:UniProtKB/Swiss-Prot;Acc:P90925]
WBGene00000241	bbs-1	26.6069	-0.45669	0.462947	-0.986483	0.323896	1	Bardet-Biedl syndrome 1 protein homolog [Source:UniProtKB/Swiss-Prot;Acc:Q9NEZ7]
WBGene00000242	bbs-2	18.7209	0.044659	0.514476	0.0868049	0.930827	1	Bardet-Biedl syndrome 2 protein homolog [Source:UniProtKB/Swiss-Prot;Acc:Q19640]
WBGene00000244	bbs-8	36.4298	0.0381441	0.483677	0.0788627	0.937142	1	Tetratricopeptide repeat protein 8 [Source:UniProtKB/Swiss-Prot;Acc:Q23049]
WBGene00000245	bca-1	609.423	-0.161391	0.228058	-0.707675	0.479147	1	Beta carbonic anhydrase 1 [Source:UniProtKB/Swiss-Prot;Acc:Q22460]
WBGene00000246	bcc-1	190.405	0.0791189	0.238064	0.332344	0.73963	1	BiCaudal C (Drosophila) homolog [Source:UniProtKB/TrEMBL;Acc:Q21593]
WBGene00000247	bec-1	1849.48	0.0424405	0.250073	0.169713	0.865236	1	Beclin homolog [Source:UniProtKB/Swiss-Prot;Acc:Q22592]
WBGene00000248	ben-1	1367.16	-0.279136	0.305071	-0.914987	0.360199	1	Tubulin beta chain [Source:UniProtKB/TrEMBL;Acc:Q18817]
WBGene00000249	bir-1	2397.81	-0.565955	0.295181	-1.91732	0.0551977	1	BIR (Baculovirus inhibitory repeat) family; Inhibitor of apoptosis homolog [Source:UniProtKB/TrEMBL;Acc:G5EFA2]
WBGene00000250	bir-2	1101.2	0.364072	0.451558	0.806257	0.420094	1	BIR (Baculovirus inhibitory repeat) family; Inhibitor of apoptosis homolog [Source:UniProtKB/TrEMBL;Acc:G5ECJ5]
WBGene00000251	bli-1	233.568	-0.883494	0.985863	-0.896163	0.370166	1	Cuticle collagen bli-1 [Source:UniProtKB/Swiss-Prot;Acc:Q09457]
WBGene00000252	bli-2	552.791	-0.905472	1.33304	-0.679255	0.496976	1	BLIstered cuticle [Source:UniProtKB/TrEMBL;Acc:O01904]
WBGene00000253	bli-3	630.343	0.0531784	0.193901	0.274256	0.783888	1	Dual oxidase 1 [Source:UniProtKB/Swiss-Prot;Acc:O61213]
WBGene00000254	bli-4	6478.21	0.126798	0.381962	0.331966	0.739915	1	Endoprotease bli-4 [Source:UniProtKB/Swiss-Prot;Acc:P51559]
WBGene00000255	bli-5	81.4904	-0.74348	0.919575	-0.808504	0.418801	1	Kunitz-type protein bli-5 [Source:UniProtKB/Swiss-Prot;Acc:O62247]
WBGene00000256	bli-6	970.736	-1.36556	1.39584	-0.978308	0.327922	1	BLIstered cuticle [Source:UniProtKB/TrEMBL;Acc:Q8MXR1]
WBGene00000257	bmk-1	3421.68	0.836039	0.403643	2.07123	0.0383372	1	Kinesin-like protein [Source:UniProtKB/TrEMBL;Acc:G5EGL7]
WBGene00000259	bpl-1	723.742	0.358677	0.40167	0.892965	0.371876	1	Biotin Protein Ligase; Biotin protein ligase, holocarboxylase synthetase (70.9 kD) alternative variant b [Source:UniProtKB/TrEMBL;Acc:G5ECZ9]
WBGene00000262	bra-1	839.137	-0.0476348	0.295538	-0.16118	0.871952	1	BMP Receptor Associated protein family [Source:UniProtKB/TrEMBL;Acc:Q20741]
WBGene00000263	F23H11.5	11672.3	-0.633859	0.555155	-1.14177	0.25355	1
WBGene00000264	brc-1	716.99	0.605388	0.393978	1.5366	0.124391	1	BRCa homolog (Tumor suppressor gene Brca1) [Source:UniProtKB/TrEMBL;Acc:B6VQ61]
WBGene00000265	brd-1	1463.67	0.295126	0.297194	0.993039	0.320691	1	BRCA1-associated RING domain protein 1 [Source:UniProtKB/Swiss-Prot;Acc:Q21209]
WBGene00000266	bre-1	1363.59	-0.113754	0.311076	-0.365681	0.714603	1	GDP-mannose 4,6 dehydratase 1 [Source:UniProtKB/Swiss-Prot;Acc:Q18801]
WBGene00000267	bre-2	84.4252	0.381124	0.318342	1.19721	0.231223	1	Beta-1,3-galactosyltransferase bre-2 [Source:UniProtKB/Swiss-Prot;Acc:Q6QMT2]
WBGene00000268	bre-3	2235.98	0.234651	0.42826	0.547918	0.583748	1	Beta-1,4-mannosyltransferase bre-3 [Source:UniProtKB/Swiss-Prot;Acc:Q03562]
WBGene00000269	bre-4	1021.76	-0.511213	0.286851	-1.78216	0.0747239	1	Beta-1,4-N-acetylgalactosaminyltransferase bre-4 [Source:UniProtKB/Swiss-Prot;Acc:Q9GUM2]
WBGene00000270	bre-5	422.407	-0.481255	0.287943	-1.67136	0.0946512	1	Beta-1,3-galactosyltransferase bre-5 [Source:UniProtKB/Swiss-Prot;Acc:Q95US5]
WBGene00000271	brf-1	1414.8	0.775275	0.474791	1.63288	0.102495	1	BRF (Transcription factor) homolog [Source:UniProtKB/TrEMBL;Acc:A0A131MCT5]
WBGene00000272	bro-1	43.379	-0.179053	0.305649	-0.585813	0.558001	1	BROther (Drosophila tx factor partner) homolog [Source:UniProtKB/TrEMBL;Acc:Q95ZL9]
WBGene00000273	brp-1	11956.6	0.693323	0.380268	1.82325	0.0682654	1	Bypass of Response to Pheromone in yeast [Source:UniProtKB/TrEMBL;Acc:I2HAF4]
WBGene00000274	btf-1	2282.54	0.351267	0.270723	1.29752	0.194454	1	BTAF (TBP-associated factor) homolog [Source:UniProtKB/TrEMBL;Acc:G5EF07]
WBGene00000275	bub-1	7594.38	0.428726	0.252709	1.69652	0.0897875	1	Mitotic checkpoint serine/threonine-protein kinase bub-1 [Source:UniProtKB/Swiss-Prot;Acc:Q21776]
WBGene00000276	byn-1	4888.2	0.0869203	0.183534	0.473592	0.635791	1	Cell adhesion protein byn-1 [Source:UniProtKB/Swiss-Prot;Acc:Q20932]
WBGene00000277	cab-1	4401.93	0.248553	0.273418	0.909058	0.36332	1
WBGene00000279	cah-1	145.371	-0.444423	0.257878	-1.72339	0.0848188	1	Carbonic AnHydrase [Source:UniProtKB/TrEMBL;Acc:A0A131MB23]
WBGene00000280	cah-2	80.7662	-0.00482727	0.40948	-0.0117888	0.990594	1	Putative carbonic anhydrase-like protein 2 [Source:UniProtKB/Swiss-Prot;Acc:Q18932]
WBGene00000281	cah-3	2073.4	-0.158223	0.410928	-0.385037	0.70021	1	Putative carbonic anhydrase 3 [Source:UniProtKB/Swiss-Prot;Acc:Q27504]
WBGene00000282	cah-4	3131.23	-0.0352688	0.302689	-0.116518	0.907242	1	Carbonic AnHydrase [Source:UniProtKB/TrEMBL;Acc:Q8WQD8]
WBGene00000283	cah-5	871.523	0.150015	0.232412	0.645468	0.518624	1	Putative carbonic anhydrase 5 [Source:UniProtKB/Swiss-Prot;Acc:Q10462]
WBGene00000284	cah-6	155.616	-0.498015	0.364098	-1.36781	0.171373	1	Carbonic AnHydrase [Source:UniProtKB/TrEMBL;Acc:O02637]
WBGene00000285	cal-1	255.375	-0.0428638	0.268902	-0.159403	0.873351	1	Calmodulin-like protein [Source:UniProtKB/Swiss-Prot;Acc:P04630]
WBGene00000286	cal-2	284.045	0.13585	0.249235	0.545069	0.585706	1	CALmodulin related genes; Calmodulin-like protein [Source:UniProtKB/TrEMBL;Acc:G5EEG0]
WBGene00000287	cal-3	88.9239	-0.226988	0.351233	-0.646261	0.51811	1	CALmodulin related genes [Source:UniProtKB/TrEMBL;Acc:U4PQW9]
WBGene00000288	cal-4	224.559	-0.211097	0.350485	-0.602299	0.546975	1	CALmodulin related genes [Source:UniProtKB/TrEMBL;Acc:G5EF93]
WBGene00000289	cam-1	3757.5	0.0571097	0.263509	0.216728	0.82842	1	Tyrosine-protein kinase receptor cam-1 [Source:UniProtKB/Swiss-Prot;Acc:G5EGK5]
WBGene00000292	cap-1	5853.83	0.0865267	0.258741	0.334414	0.738067	1	F-actin-capping protein subunit alpha [Source:UniProtKB/Swiss-Prot;Acc:P34685]
WBGene00000293	cap-2	6413.93	-0.284552	0.183486	-1.55081	0.120948	1	F-actin-capping protein subunit beta [Source:UniProtKB/Swiss-Prot;Acc:P34686]
WBGene00000294	cas-1	3975.09	-0.111827	0.228662	-0.489048	0.624808	1	Adenylyl cyclase-associated protein [Source:UniProtKB/TrEMBL;Acc:H2L023]
WBGene00000295	cat-1	69.6196	-0.265494	0.295871	-0.897332	0.369542	1
WBGene00000296	cat-2	45.3953	-0.720199	0.375881	-1.91603	0.0553611	1	Tyrosine 3-monooxygenase [Source:UniProtKB/Swiss-Prot;Acc:P90986]
WBGene00000298	cat-4	1381.54	-0.022794	0.197976	-0.115135	0.908338	1	GTP cyclohydrolase 1 [Source:UniProtKB/Swiss-Prot;Acc:Q19980]
WBGene00000301	cav-1	27935.2	-0.0397632	0.310563	-0.128036	0.898121	1	Caveolin-1 [Source:UniProtKB/Swiss-Prot;Acc:Q94051]
WBGene00000302	cav-2	172.147	-0.0142027	0.373257	-0.0380508	0.969647	1	Caveolin-2 [Source:UniProtKB/Swiss-Prot;Acc:Q18879]
WBGene00000308	C04A11.t1	3.30662	-1.50905	0.906198	-1.66526	0.0958617	1
WBGene00000366	cbp-1	4167.18	0.607269	0.299478	2.02776	0.0425848	1
WBGene00000367	cca-1	276.799	0.464535	0.369546	1.25704	0.208739	1	Voltage-dependent T-type calcium channel subunit alpha [Source:UniProtKB/TrEMBL;Acc:G5EBS2]
WBGene00000368	ccb-1	478.326	-0.339913	0.23888	-1.42294	0.154753	1	Calcium Channel, Beta subunit [Source:UniProtKB/TrEMBL;Acc:O01661]
WBGene00000369	ccf-1	5461	0.0567648	0.256531	0.221279	0.824875	1	CCR4-NOT transcription complex subunit 7 [Source:UniProtKB/Swiss-Prot;Acc:Q17345]
WBGene00000370	ccg-1	3749.41	0.486179	0.321923	1.51024	0.130983	1	Conserved Cysteine/Glycine domain protein [Source:UniProtKB/TrEMBL;Acc:Q9NA39]
WBGene00000371	cco-1	11897.2	-0.570946	0.439776	-1.29826	0.194196	1	Cytochrome C Oxidase [Source:UniProtKB/TrEMBL;Acc:P90849]
WBGene00000372	cyp-13A7	19.1121	0.672592	0.691787	0.972253	0.330925	1	Putative cytochrome P450 CYP13A7 [Source:UniProtKB/Swiss-Prot;Acc:Q27519]
WBGene00000373	cyp-14A5	3486.53	0.126735	0.574897	0.220448	0.825522	1	CYtochrome P450 family [Source:UniProtKB/TrEMBL;Acc:Q27531]
WBGene00000374	cyp-31A1	453.694	-0.704081	0.344699	-2.0426	0.0410924	1
WBGene00000375	cyp-44A1	909.314	0.030806	0.288299	0.106854	0.914905	1	Probable cytochrome P450 CYP44 [Source:UniProtKB/Swiss-Prot;Acc:Q09660]
WBGene00000376	ccr-4	8691.93	0.170762	0.385938	0.442459	0.658157	1	CCR (Yeast CCR4/NOT complex component) homolog; CCR4 [Source:UniProtKB/TrEMBL;Acc:G5EE09]
WBGene00000377	cct-1	14394.6	0.106633	0.202179	0.527418	0.597903	1	T-complex protein 1 subunit alpha [Source:UniProtKB/Swiss-Prot;Acc:P41988]
WBGene00000378	cct-2	10785.2	0.331464	0.217367	1.52491	0.127282	1	T-complex protein 1 subunit beta [Source:UniProtKB/Swiss-Prot;Acc:P47207]
WBGene00000379	cct-4	10848	0.390069	0.299818	1.30102	0.193253	1	T-complex protein 1 subunit delta [Source:UniProtKB/Swiss-Prot;Acc:P47208]
WBGene00000380	cct-5	23425.7	0.182205	0.148845	1.22412	0.220906	1	T-complex protein 1 subunit epsilon [Source:UniProtKB/Swiss-Prot;Acc:P47209]
WBGene00000381	cct-6	13242.4	0.0642287	0.16388	0.391926	0.695113	1	T-complex protein 1 subunit zeta [Source:UniProtKB/Swiss-Prot;Acc:P46550]
WBGene00000382	cdc-6	2374.02	0.430697	0.390914	1.10177	0.270562	1	Cell Division Cycle related [Source:UniProtKB/TrEMBL;Acc:P91155]
WBGene00000383	cdc-14	4361.69	0.54115	0.358593	1.50909	0.131276	1	Cell Division Cycle related [Source:UniProtKB/TrEMBL;Acc:A0A0K3ATW0]
WBGene00000386	cdc-25.1	5397.94	0.278651	0.390131	0.714249	0.475073	1	M-phase inducer phosphatase cdc-25.1 [Source:UniProtKB/Swiss-Prot;Acc:O44552]
WBGene00000387	cdc-25.2	2069.25	-0.188832	0.265273	-0.711841	0.476563	1	M-phase inducer phosphatase cdc-25.2 [Source:UniProtKB/Swiss-Prot;Acc:O44628]
WBGene00000388	cdc-25.3	432.21	-0.249634	0.67965	-0.367297	0.713397	1	M-phase inducer phosphatase cdc-25.3 [Source:UniProtKB/Swiss-Prot;Acc:P30634]
WBGene00000389	cdc-25.4	15.3216	-0.865965	1.07718	-0.803921	0.421443	1	Cell Division Cycle related [Source:UniProtKB/TrEMBL;Acc:Q21762]
WBGene00000390	cdc-42	7167.67	0.153437	0.302818	0.506697	0.612367	1	Cell division control protein 42 homolog [Source:UniProtKB/Swiss-Prot;Acc:Q05062]
WBGene00000391	cdd-1	320.995	-0.0294131	0.442677	-0.0664437	0.947025	1	Cytidine deaminase [Source:UniProtKB/TrEMBL;Acc:Q22922]
WBGene00000392	cdd-2	1781.72	-0.398166	0.405272	-0.982465	0.325871	1	Cytidine deaminase [Source:UniProtKB/TrEMBL;Acc:Q20628]
WBGene00000393	cdf-1	883.494	0.175949	0.389512	0.451717	0.651473	1	Cation diffusion facilitator family protein 1 [Source:UniProtKB/Swiss-Prot;Acc:Q95QW4]
WBGene00000395	cdh-3	290.382	0.206312	0.281945	0.731747	0.464323	1	Cadherin-3 [Source:UniProtKB/Swiss-Prot;Acc:P34616]
WBGene00000396	cdh-4	2063.15	0.668591	0.360109	1.85664	0.063363	1	Cadherin-4 [Source:UniProtKB/TrEMBL;Acc:A0A1C3NSI5]
WBGene00000397	cdh-5	112.15	-0.047566	0.47872	-0.0993606	0.920852	1	CaDHerin family [Source:UniProtKB/TrEMBL;Acc:X5M8R9]
WBGene00000399	cdh-7	536.809	-0.286067	0.498692	-0.573634	0.566215	1	CaDHerin family [Source:UniProtKB/TrEMBL;Acc:O62328]
WBGene00000401	cdh-9	154.88	-0.681095	0.340127	-2.00247	0.0452337	1	CaDHerin family [Source:UniProtKB/TrEMBL;Acc:Q21035]
WBGene00000402	cdh-10	558.147	-0.121627	0.445728	-0.272873	0.784951	1	CaDHerin family [Source:UniProtKB/TrEMBL;Acc:Q5F4U0]
WBGene00000403	casy-1	2399.23	0.165583	0.219143	0.755594	0.449892	1	CAlSYntenin/Alcadein homolog; Calsyntenin [Source:UniProtKB/TrEMBL;Acc:G5ED46]
WBGene00000405	cdk-1	9015.5	0.0223482	0.247794	0.0901886	0.928137	1	Cyclin-dependent kinase 1 [Source:UniProtKB/Swiss-Prot;Acc:P34556]
WBGene00000406	cdk-4	815.625	-0.0942116	0.272026	-0.346333	0.729093	1	Cyclin-dependent kinase 4 homolog [Source:UniProtKB/Swiss-Prot;Acc:Q9XTR1]
WBGene00000407	cdk-5	1440.9	-0.0497715	0.242607	-0.205153	0.837453	1	Cyclin-dependent-like kinase 5 [Source:UniProtKB/Swiss-Prot;Acc:G5ECH7]
WBGene00000408	cdk-7	2347.87	0.221029	0.338639	0.652698	0.513951	1	Cyclin-dependent kinase 7 [Source:UniProtKB/Swiss-Prot;Acc:G5EFV5]
WBGene00000409	cdk-8	1169.14	0.39467	0.425826	0.926835	0.354012	1	Cyclin-dependent kinase 8 [Source:UniProtKB/Swiss-Prot;Acc:P90866]
WBGene00000410	cdk-9	2035.16	-0.14129	0.189438	-0.745835	0.455767	1	Probable cyclin-dependent kinase 9 [Source:UniProtKB/Swiss-Prot;Acc:Q9TVL3]
WBGene00000411	cdl-1	13794	0.088061	0.2601	0.338566	0.734937	1	Histone RNA hairpin-binding protein [Source:UniProtKB/Swiss-Prot;Acc:Q09599]
WBGene00000412	cdr-1	69.5126	0.21784	0.398713	0.546356	0.584821	1	CaDmium Responsive; Cadmium-inducible lysosomal protein CDR-1 [Source:UniProtKB/TrEMBL;Acc:G5EE89]
WBGene00000413	cdt-1	1897.34	0.366509	0.437776	0.837207	0.402476	1	CDT (S. pombe CDC10 Dependent Transcript) homolog [Source:UniProtKB/TrEMBL;Acc:Q86S68]
WBGene00000414	cec-1	2701.69	0.214227	0.248141	0.863327	0.387957	1	Chromo domain-containing protein cec-1 [Source:UniProtKB/Swiss-Prot;Acc:P34618]
WBGene00000415	ced-1	3359.46	0.12889	0.320961	0.401574	0.687997	1	Cell death abnormality protein 1 [Source:UniProtKB/Swiss-Prot;Acc:Q9XWD6]
WBGene00000416	ced-2	3149.28	-0.142921	0.262432	-0.544602	0.586028	1	Cell death abnormality protein 2 [Source:UniProtKB/Swiss-Prot;Acc:Q9NHC3]
WBGene00000417	ced-3	3867.2	0.35837	0.430863	0.831749	0.405551	1	Cell death protein 3 Cell death protein 3 subunit 1 Cell death protein 3 subunit 2 [Source:UniProtKB/Swiss-Prot;Acc:P42573]
WBGene00000418	ced-4	1567.67	0.244937	0.434395	0.563858	0.572851	1	Cell death protein 4 [Source:UniProtKB/Swiss-Prot;Acc:P30429]
WBGene00000419	ced-5	1776.05	0.744736	0.439154	1.69584	0.0899158	1	CED-5 [Source:UniProtKB/TrEMBL;Acc:G5EEN3]
WBGene00000420	ced-6	2110.66	-0.256003	0.242817	-1.0543	0.291744	1	Cell death protein 6 [Source:UniProtKB/Swiss-Prot;Acc:O76337]
WBGene00000421	ced-7	3115.71	0.763772	0.455035	1.67849	0.0932513	1	ABC transporter ced-7 [Source:UniProtKB/Swiss-Prot;Acc:P34358]
WBGene00000422	ced-8	230.974	-0.0307269	0.337388	-0.091073	0.927435	1	Cell death abnormality protein 8 [Source:UniProtKB/Swiss-Prot;Acc:O17386]
WBGene00000423	ced-9	3943.23	-0.177336	0.243295	-0.728892	0.466068	1	Apoptosis regulator ced-9 [Source:UniProtKB/Swiss-Prot;Acc:P41958]
WBGene00000424	ced-10	3173.06	-0.110993	0.165545	-0.670471	0.502558	1	Ras-related protein ced-10 [Source:UniProtKB/Swiss-Prot;Acc:Q03206]
WBGene00000425	ced-11	642.373	0.152089	0.331683	0.458536	0.646567	1
WBGene00000426	ced-12	2714.58	0.702713	0.3538	1.98619	0.0470123	1	Cell death abnormality protein 12 [Source:UniProtKB/Swiss-Prot;Acc:Q8STE5]
WBGene00000427	ced-13	20.505	-0.291676	0.662114	-0.440522	0.659559	1
WBGene00000428	ceh-1	24.601	-0.338715	0.580925	-0.583062	0.559852	1	Homeobox protein ceh-1 [Source:RefSeq peptide;Acc:NP_508796]
WBGene00000429	ceh-2	27.1865	-0.290548	0.39878	-0.728591	0.466252	1	Homeobox protein ceh-2 [Source:UniProtKB/Swiss-Prot;Acc:G5ECT8]
WBGene00000430	ceh-5	31.0609	-0.533649	0.3963	-1.34658	0.178116	1	Homeobox protein ceh-5 [Source:UniProtKB/Swiss-Prot;Acc:P20269]
WBGene00000431	ceh-6	74.5401	-0.444708	0.427313	-1.04071	0.298011	1	Homeobox protein ceh-6 [Source:UniProtKB/Swiss-Prot;Acc:P20268]
WBGene00000432	ceh-7	1.93121	0.938612	1.695	0.553755	0.579747	1	Homeobox protein ceh-7 [Source:UniProtKB/Swiss-Prot;Acc:P20270]
WBGene00000433	ceh-8	16.8165	-0.356459	0.509224	-0.700004	0.483925	1	Homeobox protein ceh-8 [Source:UniProtKB/Swiss-Prot;Acc:Q94398]
WBGene00000434	ceh-9	15.014	-0.546584	0.572442	-0.954828	0.339665	1	Homeobox protein ceh-9 [Source:UniProtKB/Swiss-Prot;Acc:P56407]
WBGene00000435	ceh-10	69.1275	0.269269	0.430909	0.624886	0.532046	1	Homeobox protein ceh-10 [Source:UniProtKB/Swiss-Prot;Acc:P41935]
WBGene00000436	ceh-12	3.88958	0.53261	0.94667	0.562614	0.573698	1	Homeobox protein ceh-12 [Source:UniProtKB/Swiss-Prot;Acc:P17487]
WBGene00000437	ceh-13	771.246	-0.00138252	0.19694	-0.00702002	0.994399	1	Homeobox protein ceh-13 [Source:UniProtKB/Swiss-Prot;Acc:P17488]
WBGene00000438	ceh-14	47.3292	-0.17446	0.416008	-0.419367	0.674948	1	Homeobox protein ceh-14 [Source:UniProtKB/Swiss-Prot;Acc:P20271]
WBGene00000440	ceh-17	8.5237	-0.709938	0.663015	-1.07077	0.284272	1	C. Elegans Homeobox; CEH-17 [Source:UniProtKB/TrEMBL;Acc:G5EC89]
WBGene00000441	ceh-18	509.569	-0.0441307	0.31821	-0.138684	0.8897	1	Homeobox protein ceh-18 [Source:UniProtKB/Swiss-Prot;Acc:P41934]
WBGene00000442	ceh-19	24.1785	0.00590505	0.384397	0.0153618	0.987744	1	Homeobox protein ceh-19 [Source:UniProtKB/Swiss-Prot;Acc:P26797]
WBGene00000443	ceh-20	1528.83	-0.0203956	0.288677	-0.0706519	0.943675	1	Homeobox protein ceh-20 [Source:UniProtKB/Swiss-Prot;Acc:P41779]
WBGene00000444	ceh-21	757.397	-0.209852	0.264304	-0.793979	0.427208	1	Homeobox protein ceh-21 [Source:UniProtKB/Swiss-Prot;Acc:Q22811]
WBGene00000445	ceh-22	39.6862	-0.74785	0.51859	-1.44208	0.149279	1	Homeobox protein ceh-22 [Source:UniProtKB/Swiss-Prot;Acc:P41936]
WBGene00000446	ceh-23	64.5465	0.117082	0.472748	0.247663	0.804395	1	Homeobox protein ceh-23 [Source:UniProtKB/Swiss-Prot;Acc:P34663]
WBGene00000447	ceh-24	35.7242	-0.225668	0.391083	-0.577033	0.563917	1	Homeobox protein ceh-24 [Source:UniProtKB/Swiss-Prot;Acc:Q9NLC2]
WBGene00000448	pros-1	143.003	0.0397235	0.267223	0.148653	0.881827	1	Homeobox protein prospero homolog 1 [Source:UniProtKB/Swiss-Prot;Acc:P34522]
WBGene00000449	ceh-27	266.928	-0.189177	0.532849	-0.355029	0.722568	1	C. Elegans Homeobox [Source:UniProtKB/TrEMBL;Acc:Q9XVN4]
WBGene00000450	ceh-28	2.51459	1.08926	1.18729	0.917434	0.358915	1	C. Elegans Homeobox; NK-2 family homeodomain protein CEH-28 [Source:UniProtKB/TrEMBL;Acc:G5EE18]
WBGene00000451	ceh-30	50.5608	-0.0913847	0.325132	-0.281069	0.778657	1	Homeobox protein ceh-30 [Source:UniProtKB/Swiss-Prot;Acc:Q22909]
WBGene00000452	ceh-31	37.0141	-0.293046	0.370702	-0.790515	0.429227	1	Homeobox protein ceh-31 [Source:UniProtKB/Swiss-Prot;Acc:Q22910]
WBGene00000453	ceh-32	533.14	0.100622	0.283794	0.35456	0.722919	1	Homeobox protein ceh-32 [Source:UniProtKB/Swiss-Prot;Acc:Q23175]
WBGene00000454	ceh-33	18.8108	-0.367739	0.480561	-0.765228	0.444136	1	Homeobox protein ceh-33 [Source:UniProtKB/Swiss-Prot;Acc:Q94166]
WBGene00000457	ceh-36	176.5	-0.311818	0.516993	-0.603138	0.546417	1	Homeobox protein ceh-36 [Source:UniProtKB/Swiss-Prot;Acc:Q93352]
WBGene00000458	ceh-37	641.211	0.0186227	0.200082	0.0930753	0.925844	1	Homeobox protein ceh-37 [Source:UniProtKB/Swiss-Prot;Acc:Q93356]
WBGene00000459	ceh-38	2279	0.482071	0.469688	1.02636	0.30472	1	Homeobox protein ceh-38 [Source:UniProtKB/Swiss-Prot;Acc:Q19720]
WBGene00000460	ceh-39	828.208	-0.0690641	0.361841	-0.190869	0.848629	1	Homeobox protein ceh-39 [Source:UniProtKB/Swiss-Prot;Acc:Q22812]
WBGene00000461	ceh-40	347.978	0.291028	0.447797	0.649911	0.51575	1	Homeobox protein ceh-40 [Source:UniProtKB/Swiss-Prot;Acc:Q19503]
WBGene00000462	ceh-41	520.922	-0.377341	0.220161	-1.71393	0.0865413	1	C. Elegans Homeobox [Source:UniProtKB/TrEMBL;Acc:Q22810]
WBGene00000463	ceh-43	1196.42	-0.126841	0.290929	-0.435985	0.662848	1	Homeobox protein ceh-43 [Source:UniProtKB/Swiss-Prot;Acc:Q18273]
WBGene00000464	ceh-44	2118.1	0.311873	0.264517	1.17903	0.238387	1	Homeobox protein cut-like ceh-44 [Source:UniProtKB/Swiss-Prot;Acc:Q9BL02]
WBGene00000465	cpg-1	41051	0.641145	0.434303	1.47626	0.139873	1	Chondroitin proteoglycan 1 [Source:UniProtKB/Swiss-Prot;Acc:Q17802]
WBGene00000466	cel-1	2130.55	0.288564	0.351844	0.820149	0.412131	1	mRNA-capping enzyme Polynucleotide 5'-triphosphatase mRNA guanylyltransferase [Source:UniProtKB/Swiss-Prot;Acc:Q17607]
WBGene00000467	cep-1	1457.66	0.416566	0.432176	0.963882	0.335105	1	Transcription factor cep-1 [Source:UniProtKB/Swiss-Prot;Acc:Q20646]
WBGene00000468	ces-1	16.8301	-0.669488	0.745776	-0.897707	0.369342	1	CES-1; CEll death Specification [Source:UniProtKB/TrEMBL;Acc:G5ECN8]
WBGene00000469	ces-2	190.492	-0.900725	0.570202	-1.57966	0.114185	1	Cell death specification protein 2 [Source:UniProtKB/Swiss-Prot;Acc:Q94126]
WBGene00000472	cey-1	19636.5	-0.164033	0.211154	-0.77684	0.437253	1	C. Elegans Y-box [Source:UniProtKB/TrEMBL;Acc:O62213]
WBGene00000473	cey-2	54202.9	0.00769647	0.287393	0.0267803	0.978635	1	C. Elegans Y-box [Source:UniProtKB/TrEMBL;Acc:P91306]
WBGene00000474	cey-3	27659.4	-0.073412	0.309015	-0.237568	0.812216	1	C. Elegans Y-box [Source:UniProtKB/TrEMBL;Acc:P91398]
WBGene00000475	cey-4	25935.9	-0.0424618	0.234524	-0.181056	0.856324	1	C. Elegans Y-box [Source:UniProtKB/TrEMBL;Acc:G5EDV3]
WBGene00000476	cfi-1	73.7443	0.133954	0.571768	0.23428	0.814767	1	AT-rich interactive domain-containing protein cfi-1 [Source:UniProtKB/Swiss-Prot;Acc:O02326]
WBGene00000477	cft-1	82.6856	0.468881	0.383006	1.22421	0.220871	1	Cystic Fibrosis Transmembrane conductance regulator homolog [Source:UniProtKB/TrEMBL;Acc:Q95QV2]
WBGene00000478	cfz-2	548.074	-0.373465	0.229839	-1.6249	0.104185	1	Frizzled-2 [Source:UniProtKB/Swiss-Prot;Acc:G5ECQ2]
WBGene00000479	cgh-1	38001.4	0.614576	0.361239	1.7013	0.0888865	1	ATP-dependent RNA helicase cgh-1 [Source:UniProtKB/Swiss-Prot;Acc:Q95YF3]
WBGene00000480	cgp-1	8089.32	0.0188599	0.39489	0.0477599	0.961908	1	GTP-binding protein cgp-1 [Source:UniProtKB/Swiss-Prot;Acc:Q18905]
WBGene00000481	cha-1	149.142	-0.71334	0.446763	-1.59668	0.110336	1	Choline O-acetyltransferase [Source:UniProtKB/Swiss-Prot;Acc:P32756]
WBGene00000482	chd-3	2877.12	0.478754	0.293598	1.63064	0.102965	1	Chromodomain-helicase-DNA-binding protein 3 homolog [Source:UniProtKB/Swiss-Prot;Acc:Q22516]
WBGene00000483	che-1	1.87291	-0.0821501	1.28444	-0.0639579	0.949004	1	Transcription factor che-1 [Source:UniProtKB/Swiss-Prot;Acc:Q966L8]
WBGene00000484	che-2	14.5602	0.321182	0.614112	0.523002	0.600973	1	CHE-2 protein [Source:UniProtKB/TrEMBL;Acc:G5EGF0]
WBGene00000485	che-3	85.1735	0.357002	0.403081	0.885683	0.375788	1	Cytoplasmic dynein 2 heavy chain 1 [Source:UniProtKB/Swiss-Prot;Acc:Q19542]
WBGene00000487	che-6	4.22109	0.177051	1.06441	0.166338	0.867891	1
WBGene00000488	che-7	43.6316	-0.27038	0.429727	-0.62919	0.529225	1	Innexin [Source:UniProtKB/TrEMBL;Acc:A0A131MB60]
WBGene00000490	che-11	19.9911	0.770184	0.461275	1.66968	0.0949819	1
WBGene00000491	che-12	52.4547	0.321493	0.503735	0.638218	0.523332	1	Crescerin-like protein che-12 [Source:UniProtKB/Swiss-Prot;Acc:Q17423]
WBGene00000492	che-13	35.7404	0.267936	0.431222	0.621342	0.534375	1	Intraflagellar transport protein che-13 [Source:UniProtKB/Swiss-Prot;Acc:Q93833]
WBGene00000493	che-14	237.466	-0.417622	0.377268	-1.10696	0.268309	1	CHE-14 protein [Source:UniProtKB/TrEMBL;Acc:G5EEW0]
WBGene00000496	chs-1	7483.96	0.637101	0.547104	1.1645	0.244223	1	CHitin Synthase; Chitin synthase 1 [Source:UniProtKB/TrEMBL;Acc:G5ECD6]
WBGene00000497	chs-2	300.466	0.0585947	0.315539	0.185697	0.852682	1	CHitin Synthase; Chitin synthase 2 [Source:UniProtKB/TrEMBL;Acc:G5EBQ8]
WBGene00000498	chk-1	4628.17	-0.266731	0.358043	-0.74497	0.45629	1	Serine/threonine-protein kinase chk-1 [Source:UniProtKB/Swiss-Prot;Acc:Q9N3Z3]
WBGene00000499	chk-2	218.814	0.116002	0.397727	0.291663	0.770544	1	Serine/threonine-protein kinase chk-2 [Source:UniProtKB/Swiss-Prot;Acc:Q9U1Y5]
WBGene00000500	chn-1	2290.47	-0.0351147	0.29754	-0.118017	0.906054	1	C-term of Hsp70-iNteracting protein (CHIP family); Hsp70-interacting protein [Source:UniProtKB/TrEMBL;Acc:G5ECY6]
WBGene00000501	cho-1	168.306	-0.367061	0.457818	-0.801763	0.42269	1	High-affinity choline transporter 1 [Source:UniProtKB/Swiss-Prot;Acc:O02228]
WBGene00000502	chp-1	2733.91	0.117402	0.20772	0.565192	0.571943	1	CHORD Protein; CHORD containing protein [Source:UniProtKB/TrEMBL;Acc:G5EEI8]
WBGene00000503	cht-1	15654.1	0.20285	0.342673	0.591965	0.553874	1	Probable endochitinase [Source:UniProtKB/Swiss-Prot;Acc:Q11174]
WBGene00000506	cic-1	886.2	0.0262619	0.282941	0.0928175	0.926049	1	Cyclin-C [Source:UniProtKB/Swiss-Prot;Acc:Q9TYP2]
WBGene00000507	cit-1.1	1023.71	0.32668	0.331122	0.986587	0.323845	1	Cyclin-T1.1 [Source:UniProtKB/Swiss-Prot;Acc:P34425]
WBGene00000508	cit-1.2	1782.07	-0.0480117	0.215182	-0.223121	0.823441	1	Cyclin-T1.2 [Source:UniProtKB/Swiss-Prot;Acc:P34424]
WBGene00000509	cka-1	1592.75	0.107033	0.370658	0.288765	0.772761	1	Choline Kinase A [Source:UniProtKB/TrEMBL;Acc:B3GWD5]
WBGene00000510	cka-2	190.704	-0.335689	0.371057	-0.904683	0.365633	1	Choline kinase A2 [Source:UniProtKB/Swiss-Prot;Acc:Q22942]
WBGene00000511	ckb-1	229.584	-0.122704	0.230645	-0.532006	0.594722	1	Choline kinase B1 [Source:UniProtKB/Swiss-Prot;Acc:P46558]
WBGene00000512	ckb-2	434.244	0.0497401	0.378239	0.131504	0.895376	1	Choline kinase B2 [Source:UniProtKB/Swiss-Prot;Acc:P46559]
WBGene00000513	ckb-3	5.93573	0.125515	0.787627	0.159358	0.873387	1	Putative choline kinase B3 [Source:UniProtKB/Swiss-Prot;Acc:P46560]
WBGene00000514	ckb-4	576.385	-0.234259	0.314929	-0.743848	0.456969	1	Choline Kinase B [Source:UniProtKB/TrEMBL;Acc:Q9GZF3]
WBGene00000515	ckc-1	724.78	0.251968	0.336254	0.74934	0.453653	1	Choline Kinase C [Source:UniProtKB/TrEMBL;Acc:Q86MJ6]
WBGene00000516	cki-1	730.537	-0.323805	0.407481	-0.79465	0.426817	1	Cyclin-dependent kinase inhibitor 1 [Source:UniProtKB/Swiss-Prot;Acc:Q22197]
WBGene00000517	cki-2	1883.12	0.0795501	0.216	0.368287	0.712659	1	CKI family (Cyclin-dependent Kinase Inhibitor); Cyclin-dependent kinase inhibitor [Source:UniProtKB/TrEMBL;Acc:G5EEJ2]
WBGene00000518	ckk-1	216.571	-0.214037	0.265544	-0.806032	0.420224	1	Calcium/calmodulin-dependent protein kinase kinase [Source:UniProtKB/Swiss-Prot;Acc:Q3Y416]
WBGene00000519	cku-70	2057.41	0.460845	0.421205	1.09411	0.273907	1	Caenorhabditis KU [Source:UniProtKB/TrEMBL;Acc:Q9U2D2]
WBGene00000520	cku-80	1525.54	0.682674	0.48098	1.41934	0.1558	1	ATP-dependent DNA helicase II subunit 2 [Source:UniProtKB/TrEMBL;Acc:Q21829]
WBGene00000521	cky-1	57.9488	-0.671005	0.456273	-1.47062	0.141393	1	CKY homolog; Putative transcription factor C15C8.2 [Source:UniProtKB/TrEMBL;Acc:G5EFA5]
WBGene00000522	clc-1	2465.19	0.225635	0.627142	0.359784	0.719009	1	CLaudin-like in Caenorhabditis [Source:UniProtKB/TrEMBL;Acc:Q93198]
WBGene00000523	clc-2	211.51	-0.425745	0.374888	-1.13566	0.256099	1	Clc-like protein 2 [Source:UniProtKB/Swiss-Prot;Acc:Q11085]
WBGene00000524	clc-3	97.7042	-0.660703	0.440438	-1.50011	0.133587	1	CLaudin-like in Caenorhabditis [Source:UniProtKB/TrEMBL;Acc:Q23532]
WBGene00000525	clc-4	9.7368	0.129607	0.606886	0.213561	0.83089	1	CLaudin-like in Caenorhabditis [Source:UniProtKB/TrEMBL;Acc:Q22191]
WBGene00000526	clc-5	237.456	-0.543501	0.284101	-1.91306	0.0557407	1	Clc-like protein 5 [Source:UniProtKB/Swiss-Prot;Acc:Q9NGJ7]
WBGene00000527	cle-1	1174.03	0.712127	0.524137	1.35867	0.174252	1	CLE-1C protein; CoLlagen with Endostatin domain [Source:UniProtKB/TrEMBL;Acc:G5EDQ4]
WBGene00000528	clh-1	1419.14	0.43584	0.38668	1.12713	0.259686	1	Chloride channel protein [Source:UniProtKB/TrEMBL;Acc:G5EDQ0]
WBGene00000529	clh-2	128.028	-0.349658	0.345305	-1.0126	0.311249	1	Chloride channel protein [Source:UniProtKB/TrEMBL;Acc:G5EG93]
WBGene00000530	clh-3	664.3	0.248514	0.368719	0.673994	0.500315	1	Chloride channel protein clh-3 [Source:UniProtKB/Swiss-Prot;Acc:Q9BMK9]
WBGene00000531	clh-4	45.7123	0.34348	0.4548	0.755232	0.450109	1	Chloride channel protein [Source:UniProtKB/TrEMBL;Acc:Q95ZP4]
WBGene00000532	clh-5	2835.5	0.0837622	0.378395	0.221362	0.824811	1	Chloride channel protein [Source:UniProtKB/TrEMBL;Acc:G5EGT4]
WBGene00000533	clh-6	1742.06	0.480856	0.451777	1.06437	0.287163	1	Chloride channel protein [Source:UniProtKB/TrEMBL;Acc:G5EC75]
WBGene00000534	cpi-2	8551.55	0.176641	0.315164	0.560471	0.575158	1	Cystatin [Source:UniProtKB/TrEMBL;Acc:G5ECM9]
WBGene00000535	cpi-1	14772.2	0.722084	0.316118	2.28422	0.0223584	1	Cystatin [Source:UniProtKB/TrEMBL;Acc:G5EDZ9]
WBGene00000536	clk-1	855.975	0.140994	0.160244	0.879867	0.378932	1	5-demethoxyubiquinone hydroxylase, mitochondrial [Source:UniProtKB/Swiss-Prot;Acc:P48376]
WBGene00000537	clk-2	933.011	0.580004	0.36573	1.58588	0.112767	1	Telomere length regulation protein clk-2 [Source:UniProtKB/Swiss-Prot;Acc:Q95YE9]
WBGene00000539	cln-3.1	172.743	-0.372376	0.426212	-0.873686	0.382289	1	Battenin [Source:UniProtKB/TrEMBL;Acc:G5EBM4]
WBGene00000540	cln-3.2	516.422	-0.00165065	0.211098	-0.00781938	0.993761	1	Battenin [Source:UniProtKB/TrEMBL;Acc:G5ECU8]
WBGene00000541	cln-3.3	132.646	-0.283622	0.562618	-0.504111	0.614183	1	Battenin [Source:UniProtKB/TrEMBL;Acc:G5EES1]
WBGene00000542	clp-1	4984.83	0.214613	0.294083	0.729771	0.46553	1	Calpain clp-1 [Source:UniProtKB/Swiss-Prot;Acc:P34308]
WBGene00000543	clp-2	1104.39	0.557653	0.375016	1.48701	0.137012	1	CaLPain family [Source:UniProtKB/TrEMBL;Acc:Q22143]
WBGene00000544	clp-3	31.5566	0.334023	0.596619	0.559859	0.575576	1	CaLPain family [Source:UniProtKB/TrEMBL;Acc:Q9U2B2]
WBGene00000545	clp-4	1560.73	0.0252961	0.21058	0.120126	0.904384	1	CaLPain family [Source:UniProtKB/TrEMBL;Acc:Q8IAA9]
WBGene00000546	clp-6	61.4709	-0.23414	0.489929	-0.477906	0.632717	1	CaLPain family [Source:UniProtKB/TrEMBL;Acc:Q9N4B2]
WBGene00000547	clp-7	3945.26	0.366715	0.219846	1.66805	0.0953052	1	CaLPain family [Source:UniProtKB/TrEMBL;Acc:U4PMH7]
WBGene00000548	clr-1	2882.46	0.681343	0.415697	1.63904	0.101206	1	Receptor-type tyrosine-protein phosphatase [Source:UniProtKB/Swiss-Prot;Acc:H2KZM6]
WBGene00000549	cls-2	3686.63	0.0518297	0.198099	0.261636	0.793602	1	CLASP family of microtubule-binding proteins [Source:UniProtKB/TrEMBL;Acc:K8ESK4]
WBGene00000550	clu-1	4016.94	0.478612	0.328868	1.45533	0.145578	1	Clustered mitochondria protein homolog [Source:UniProtKB/Swiss-Prot;Acc:P34466]
WBGene00000551	clx-1	48.1397	-0.0107882	0.697195	-0.0154737	0.987654	1	CoLlagen sequence X-hybridizing [Source:UniProtKB/TrEMBL;Acc:Q18756]
WBGene00000552	cmd-1	15300.7	0.0335732	0.195825	0.171445	0.863874	1	Calmodulin [Source:UniProtKB/Swiss-Prot;Acc:O16305]
WBGene00000553	cmk-1	290.699	-0.0525439	0.327095	-0.160638	0.872378	1	Calcium/calmodulin-dependent protein kinase type 1 [Source:UniProtKB/Swiss-Prot;Acc:Q9TXJ0]
WBGene00000554	cnb-1	1645.58	-0.140208	0.260799	-0.537607	0.590848	1	Protein phosphatase 2B regulatory subunit cnb-1 [Source:UniProtKB/Swiss-Prot;Acc:G5EDN6]
WBGene00000555	cnc-1	6.29418	-1.07549	0.891261	-1.20671	0.227546	1	CaeNaCin (Caenorhabditis bacteriocin) [Source:UniProtKB/TrEMBL;Acc:O44615]
WBGene00000556	cnc-2	353.625	-0.395774	0.961737	-0.41152	0.680691	1	CaeNaCin (Caenorhabditis bacteriocin) [Source:UniProtKB/TrEMBL;Acc:O44611]
WBGene00000557	cnc-3	467.119	-0.244716	0.637409	-0.383923	0.701035	1	CaeNaCin (Caenorhabditis bacteriocin) [Source:UniProtKB/TrEMBL;Acc:O44612]
WBGene00000558	cnc-4	503.903	-0.263187	0.574541	-0.458083	0.646893	1	CaeNaCin (Caenorhabditis bacteriocin) [Source:UniProtKB/TrEMBL;Acc:O44613]
WBGene00000559	cnc-5	0.234574	-0.820906	5.23202	-0.156901	0.875323	1	CaeNaCin (Caenorhabditis bacteriocin) [Source:UniProtKB/TrEMBL;Acc:O44614]
WBGene00000560	cnc-6	30.173	-0.636424	0.564341	-1.12773	0.259434	1	CaeNaCin (Caenorhabditis bacteriocin) [Source:UniProtKB/TrEMBL;Acc:Q9N3V6]
WBGene00000561	cnd-1	61.5804	0.425152	0.287574	1.47841	0.139298	1	Neurogenic differentiation factor 1 [Source:UniProtKB/Swiss-Prot;Acc:P46581]
WBGene00000562	cng-1	336.421	-0.594291	0.496767	-1.19632	0.231573	1	Cyclic Nucleotide Gated channel [Source:UniProtKB/TrEMBL;Acc:A8WI01]
WBGene00000563	cng-3	4.61699	-0.229493	0.972893	-0.235887	0.81352	1	Cyclic Nucleotide Gated channel [Source:UniProtKB/TrEMBL;Acc:Q7Z205]
WBGene00000564	cnk-1	2034.64	0.193406	0.392307	0.492995	0.622016	1	Connector enhancer of kinase suppressor of ras [Source:UniProtKB/Swiss-Prot;Acc:G5EEW9]
WBGene00000565	cnt-1	2010.04	0.24491	0.209164	1.1709	0.24164	1	Arf-GAP with ANK repeat and PH domain-containing protein cnt-1 Truncated ctn-1 [Source:UniProtKB/Swiss-Prot;Acc:Q9XXH8]
WBGene00000566	cnt-2	3106.46	-0.101774	0.195009	-0.521893	0.601745	1	Arf-GAP with ANK repeat and PH domain-containing protein cnt-2 [Source:UniProtKB/Swiss-Prot;Acc:Q9XX14]
WBGene00000567	cnx-1	7429.96	0.40228	0.424448	0.947771	0.343246	1	Calnexin [Source:UniProtKB/Swiss-Prot;Acc:P34652]
WBGene00000583	cof-2	68.979	0.186387	0.310138	0.60098	0.547853	1	COlmedin (Collagen plus olFactomedin) family; Collagen/olfactomedin domain containing protein 2 [Source:UniProtKB/TrEMBL;Acc:G5EBT7]
WBGene00000584	cog-1	99.3651	-0.344183	0.466557	-0.737709	0.460691	1	COG-1B [Source:UniProtKB/TrEMBL;Acc:G5EGF2]
WBGene00000585	cogc-2	1547.46	0.297421	0.410489	0.724554	0.468726	1	Conserved oligomeric Golgi complex subunit 2 [Source:UniProtKB/Swiss-Prot;Acc:Q21444]
WBGene00000591	coh-1	1154.38	0.243719	0.251432	0.969325	0.332383	1	COHesin family [Source:UniProtKB/TrEMBL;Acc:A0A131MBD0]
WBGene00000593	col-2	579.419	0.523892	1.43475	0.365145	0.715003	1	Cuticle collagen 2 [Source:UniProtKB/Swiss-Prot;Acc:P17656]
WBGene00000594	col-3	1074.79	0.312981	1.10795	0.282487	0.77757	1	COLlagen; COLlagen structural [Source:UniProtKB/TrEMBL;Acc:G5EDG6]
WBGene00000596	col-7	6.29318	-2.26122	1.46568	-1.54278	0.122885	1	Cuticle collagen 7 [Source:UniProtKB/Swiss-Prot;Acc:P18832]
WBGene00000597	col-8	6788.09	0.641523	0.629466	1.01915	0.30813	1	Cuticle collagen 8 [Source:UniProtKB/Swiss-Prot;Acc:P18833]
WBGene00000598	col-9	6.54936	0.273086	0.726659	0.37581	0.707058	1	COLlagen [Source:UniProtKB/TrEMBL;Acc:Q20744]
WBGene00000599	col-10	5358.37	-1.69036	0.893845	-1.89111	0.0586098	1	Cuticle collagen 10 [Source:UniProtKB/Swiss-Prot;Acc:Q17460]
WBGene00000601	col-12	1012.55	-1.16379	1.34119	-0.867732	0.385541	1	Cuticle collagen 12 [Source:UniProtKB/Swiss-Prot;Acc:P20630]
WBGene00000602	col-13	396.72	-1.43691	1.31303	-1.09435	0.273803	1	Cuticle collagen 13 [Source:UniProtKB/Swiss-Prot;Acc:P20631]
WBGene00000603	col-14	3179.17	-0.941767	0.907023	-1.03831	0.299128	1	Cuticle collagen 14 [Source:UniProtKB/Swiss-Prot;Acc:P18834]
WBGene00000606	col-17	10390.1	-0.423749	0.787476	-0.53811	0.590501	1	COLlagen [Source:UniProtKB/TrEMBL;Acc:P91248]
WBGene00000608	col-19	8437.63	0.617546	0.639145	0.966207	0.333941	1	Cuticle collagen 19 [Source:UniProtKB/Swiss-Prot;Acc:P18835]
WBGene00000609	col-20	5157.86	0.473384	0.438484	1.07959	0.280324	1	COLlagen [Source:UniProtKB/TrEMBL;Acc:P91249]
WBGene00000610	col-33	130.732	-0.538716	0.9421	-0.571825	0.567441	1	COLlagen [Source:UniProtKB/TrEMBL;Acc:Q20091]
WBGene00000611	col-34	504.178	-0.579086	0.533333	-1.08579	0.277573	1	Cuticle collagen 34 [Source:UniProtKB/Swiss-Prot;Acc:P34687]
WBGene00000612	col-35	106.911	0.194615	1.77386	0.109713	0.912637	1	COLlagen [Source:UniProtKB/TrEMBL;Acc:Q93208]
WBGene00000613	col-36	1110.49	-0.039643	1.6822	-0.0235662	0.981199	1	Cuticle collagen 36 [Source:UniProtKB/Swiss-Prot;Acc:P34803]
WBGene00000614	col-37	346.642	-0.632249	1.68281	-0.375711	0.707132	1	COLlagen [Source:UniProtKB/TrEMBL;Acc:G5ECU6]
WBGene00000615	col-38	1048.83	-1.11291	1.23609	-0.900346	0.367936	1	COLlagen [Source:UniProtKB/TrEMBL;Acc:Q20754]
WBGene00000616	col-39	5694.52	-1.23657	1.10127	-1.12286	0.261498	1	Cuticle collagen 39 [Source:UniProtKB/Swiss-Prot;Acc:Q09455]
WBGene00000617	col-40	798.708	0.0228103	1.55431	0.0146755	0.988291	1	Cuticle collagen 40 [Source:UniProtKB/Swiss-Prot;Acc:P34804]
WBGene00000618	col-41	5529.05	-0.638275	0.728987	-0.875564	0.381267	1	COLlagen [Source:UniProtKB/TrEMBL;Acc:Q22369]
WBGene00000620	col-43	1156.3	0.176371	1.39083	0.12681	0.899091	1	COLlagen; Collagen [Source:UniProtKB/TrEMBL;Acc:G5ED38]
WBGene00000621	col-44	60.2721	0.26867	1.08166	0.248386	0.803836	1	COLlagen [Source:UniProtKB/TrEMBL;Acc:Q20739]
WBGene00000622	col-45	338.92	0.136439	1.19619	0.114061	0.909189	1	COLlagen [Source:UniProtKB/TrEMBL;Acc:V6CM19]
WBGene00000623	col-46	359.821	-0.664218	0.779624	-0.851972	0.39423	1	COLlagen [Source:UniProtKB/TrEMBL;Acc:Q1EPL5]
WBGene00000624	col-47	87.5198	-0.724731	0.87742	-0.825979	0.408816	1	COLlagen [Source:UniProtKB/TrEMBL;Acc:V6CLE3]
WBGene00000625	col-48	2200.06	-1.0312	0.921998	-1.11844	0.263378	1	COLlagen [Source:UniProtKB/TrEMBL;Acc:Q9N3D7]
WBGene00000626	col-49	549.154	-1.40344	1.44554	-0.970875	0.33161	1	COLlagen [Source:UniProtKB/TrEMBL;Acc:O44989]
WBGene00000627	col-50	221.137	0.131753	1.56151	0.0843753	0.932758	1	COLlagen [Source:UniProtKB/TrEMBL;Acc:O01662]
WBGene00000628	col-51	186.881	0.182751	1.52603	0.119756	0.904677	1	COLlagen [Source:UniProtKB/TrEMBL;Acc:Q7Z152]
WBGene00000629	col-52	3.76425	-0.242235	0.900519	-0.268994	0.787934	1	COLlagen [Source:UniProtKB/TrEMBL;Acc:O01873]
WBGene00000630	col-53	48.3366	-0.558078	0.380638	-1.46616	0.142604	1	COLlagen [Source:UniProtKB/TrEMBL;Acc:E5QCF2]
WBGene00000631	col-54	928.675	-0.962596	0.900149	-1.06937	0.284901	1	COLlagen [Source:UniProtKB/TrEMBL;Acc:O44774]
WBGene00000632	col-55	2.58355	-1.30627	1.29631	-1.00768	0.313607	1	COLlagen [Source:UniProtKB/TrEMBL;Acc:O01860]
WBGene00000633	col-56	7.21565	-1.00527	0.835773	-1.2028	0.229055	1	COLlagen [Source:UniProtKB/TrEMBL;Acc:Q9GYS2]
WBGene00000634	col-58	343.301	-1.01678	0.962121	-1.05681	0.290596	1	COLlagen [Source:UniProtKB/TrEMBL;Acc:P91274]
WBGene00000636	col-60	207.157	-1.44808	0.949168	-1.52563	0.127102	1	COLlagen [Source:UniProtKB/TrEMBL;Acc:Q19725]
WBGene00000637	col-61	66.9643	-0.845094	0.863534	-0.978646	0.327755	1	COLlagen [Source:UniProtKB/TrEMBL;Acc:Q17582]
WBGene00000638	col-62	9.93116	-0.796887	0.874731	-0.911008	0.362291	1	COLlagen [Source:UniProtKB/TrEMBL;Acc:Q93207]
WBGene00000639	col-63	587.015	-1.25215	1.36094	-0.920061	0.357541	1	COLlagen [Source:UniProtKB/TrEMBL;Acc:Q94399]
WBGene00000640	col-64	14.7674	0.654492	0.486701	1.34475	0.178706	1	COLlagen [Source:UniProtKB/TrEMBL;Acc:O02271]
WBGene00000641	col-65	1885.37	-1.03556	0.890512	-1.16288	0.244879	1	COLlagen [Source:UniProtKB/TrEMBL;Acc:Q9XUT4]
WBGene00000642	col-66	2.79681	-1.46503	1.49908	-0.977284	0.328428	1
WBGene00000644	col-68	104.035	-0.212059	0.467117	-0.453973	0.649848	1	COLlagen [Source:UniProtKB/TrEMBL;Acc:O44796]
WBGene00000645	col-69	61.1038	-0.848898	0.596254	-1.42372	0.154527	1	COLlagen [Source:UniProtKB/TrEMBL;Acc:Q9TZ57]
WBGene00000646	H17B01.2	15.4806	-0.810889	0.916385	-0.884879	0.376222	1
WBGene00000647	col-71	2071.57	-0.891819	1.08041	-0.825442	0.409121	1	COLlagen [Source:UniProtKB/TrEMBL;Acc:Q9N4U2]
WBGene00000648	col-72	82.6082	-0.0840553	1.4546	-0.0577857	0.953919	1	COLlagen [Source:UniProtKB/TrEMBL;Acc:H2L0P1]
WBGene00000649	col-73	8363.04	-0.721852	0.831174	-0.868472	0.385136	1	COLlagen [Source:UniProtKB/TrEMBL;Acc:P91250]
WBGene00000650	col-74	11.2651	-1.2567	0.772777	-1.62621	0.103904	1	COLlagen [Source:UniProtKB/TrEMBL;Acc:Q23422]
WBGene00000651	col-75	8.14157	-0.296722	0.84085	-0.352884	0.724176	1	Putative cuticle collagen 75 [Source:UniProtKB/Swiss-Prot;Acc:Q09578]
WBGene00000652	col-76	539.269	-0.811032	0.40897	-1.98311	0.0473553	1	COLlagen [Source:UniProtKB/TrEMBL;Acc:Q21528]
WBGene00000653	col-77	2989.61	-1.24516	1.16103	-1.07246	0.283514	1	COLlagen [Source:UniProtKB/TrEMBL;Acc:Q21562]
WBGene00000654	col-78	3.73438	-1.16257	1.42453	-0.816109	0.414438	1	COLlagen [Source:UniProtKB/TrEMBL;Acc:Q9U336]
WBGene00000655	col-79	128.276	-0.697395	1.21044	-0.576149	0.564514	1	Putative cuticle collagen 79 [Source:UniProtKB/Swiss-Prot;Acc:Q09233]
WBGene00000656	col-80	4666.17	0.267083	0.538569	0.495912	0.619957	1	Putative cuticle collagen 80 [Source:UniProtKB/Swiss-Prot;Acc:Q09456]
WBGene00000657	col-81	234.05	-1.23689	0.866151	-1.42803	0.153283	1	COLlagen [Source:UniProtKB/TrEMBL;Acc:Q20135]
WBGene00000658	col-83	33.1031	-0.340747	0.655235	-0.520037	0.603038	1	COLlagen [Source:UniProtKB/TrEMBL;Acc:Q9NAQ4]
WBGene00000659	col-84	409.529	0.224614	1.27863	0.175667	0.860555	1	COLlagen [Source:UniProtKB/TrEMBL;Acc:Q21437]
WBGene00000660	col-85	362.588	0.147645	1.21299	0.12172	0.903121	1	COLlagen [Source:UniProtKB/TrEMBL;Acc:O18097]
WBGene00000661	col-86	20.8326	0.518693	0.59747	0.868149	0.385313	1	COLlagen [Source:UniProtKB/TrEMBL;Acc:Q9XVY1]
WBGene00000662	col-87	8.83553	-0.243574	0.902123	-0.270001	0.787159	1	COLlagen [Source:UniProtKB/TrEMBL;Acc:Q7YTG4]
WBGene00000663	col-88	202.666	-2.04109	1.26099	-1.61864	0.105525	1	COLlagen [Source:UniProtKB/TrEMBL;Acc:O44904]
WBGene00000664	col-89	153.739	-0.954986	0.775876	-1.23085	0.21838	1	COLlagen [Source:UniProtKB/TrEMBL;Acc:Q19528]
WBGene00000665	col-90	5636.22	-0.725158	0.767267	-0.945118	0.344599	1	Putative cuticle collagen 90 [Source:UniProtKB/Swiss-Prot;Acc:P34340]
WBGene00000666	col-91	969.022	-1.81596	1.29685	-1.40028	0.161429	1	Putative cuticle collagen 91 [Source:UniProtKB/Swiss-Prot;Acc:P34391]
WBGene00000667	col-92	854.827	-2.14016	1.29507	-1.65255	0.0984235	1	COLlagen [Source:UniProtKB/TrEMBL;Acc:Q9XVG3]
WBGene00000668	col-93	3470.64	-0.506713	0.722672	-0.701166	0.483199	1	COLlagen [Source:UniProtKB/TrEMBL;Acc:Q9U348]
WBGene00000670	col-95	13587	0.703012	0.657649	1.06898	0.28508	1	COLlagen [Source:UniProtKB/TrEMBL;Acc:Q86MP1]
WBGene00000671	col-96	279.419	-0.0969766	0.455854	-0.212736	0.831533	1	COLlagen [Source:UniProtKB/TrEMBL;Acc:Q86MP2]
WBGene00000672	col-97	3893.36	-1.11523	1.07721	-1.03529	0.300533	1	COLlagen [Source:UniProtKB/TrEMBL;Acc:O18286]
WBGene00000673	col-98	12028.8	-0.448696	0.784137	-0.572217	0.567175	1	COLlagen [Source:UniProtKB/TrEMBL;Acc:O17805]
WBGene00000674	col-99	495.367	-0.403331	0.599821	-0.672419	0.501317	1	Putative cuticle collagen 99 [Source:UniProtKB/Swiss-Prot;Acc:O76368]
WBGene00000675	col-101	13907.4	0.649227	0.629903	1.03068	0.302692	1	COLlagen [Source:UniProtKB/TrEMBL;Acc:U4PFF3]
WBGene00000676	col-102	392.244	0.304071	1.59095	0.191126	0.848427	1	COLlagen [Source:UniProtKB/TrEMBL;Acc:Q9GZF7]
WBGene00000677	col-103	9944.5	-0.290454	0.596643	-0.486814	0.62639	1	COLlagen [Source:UniProtKB/TrEMBL;Acc:O45114]
WBGene00000678	col-104	2161.41	-1.34998	1.17861	-1.1454	0.252045	1	COLlagen [Source:UniProtKB/TrEMBL;Acc:O44174]
WBGene00000679	col-105	20.8427	-1.80527	0.746169	-2.41938	0.0155468	1	COLlagen [Source:UniProtKB/TrEMBL;Acc:O44173]
WBGene00000680	col-106	22983.3	0.416711	0.50984	0.817337	0.413736	1	COLlagen [Source:UniProtKB/TrEMBL;Acc:Q8MXT6]
WBGene00000681	col-107	14515.8	-0.967745	1.11703	-0.866357	0.386294	1	COLlagen [Source:UniProtKB/TrEMBL;Acc:Q86S35]
WBGene00000682	col-108	19.2626	-0.319421	0.76159	-0.419413	0.674914	1	COLlagen [Source:UniProtKB/TrEMBL;Acc:Q95Y22]
WBGene00000683	col-109	2407.32	-0.982587	0.929852	-1.05671	0.290643	1	COLlagen [Source:UniProtKB/TrEMBL;Acc:Q9N527]
WBGene00000684	col-110	172.009	-1.04135	1.218	-0.854962	0.392572	1	COLlagen [Source:UniProtKB/TrEMBL;Acc:Q19592]
WBGene00000685	col-111	908.833	-0.853687	0.841769	-1.01416	0.310507	1	COLlagen [Source:UniProtKB/TrEMBL;Acc:U4PM21]
WBGene00000687	col-113	362.603	-0.862041	0.534086	-1.61405	0.106517	1	COLlagen [Source:UniProtKB/TrEMBL;Acc:Q18450]
WBGene00000688	col-114	96.946	-1.52379	1.33373	-1.1425	0.253247	1	COLlagen [Source:UniProtKB/TrEMBL;Acc:Q18975]
WBGene00000689	col-115	328.545	-0.723506	0.810905	-0.89222	0.372275	1	COLlagen [Source:UniProtKB/TrEMBL;Acc:Q9N3X9]
WBGene00000690	col-116	80.1291	0.183645	0.403565	0.455057	0.649068	1	COLlagen [Source:UniProtKB/TrEMBL;Acc:O61525]
WBGene00000691	col-117	741.558	0.510569	1.15528	0.441945	0.658529	1	COLlagen; COLlagen structural [Source:UniProtKB/TrEMBL;Acc:G5EDG6]
WBGene00000692	col-118	715.641	-0.592613	0.697917	-0.849116	0.395817	1	COLlagen [Source:UniProtKB/TrEMBL;Acc:A5JYR8]
WBGene00000693	col-119	33644.4	0.931839	0.741011	1.25753	0.208563	1	COLlagen [Source:UniProtKB/TrEMBL;Acc:Q18799]
WBGene00000694	col-120	253.487	-2.13372	1.46641	-1.45506	0.145652	1	COLlagen [Source:UniProtKB/TrEMBL;Acc:Q9XWR2]
WBGene00000695	col-121	252.547	-0.449999	0.63609	-0.707446	0.479289	1	COLlagen [Source:UniProtKB/TrEMBL;Acc:Q20880]
WBGene00000696	col-122	29915.6	0.663685	0.431723	1.5373	0.124221	1	COLlagen [Source:UniProtKB/TrEMBL;Acc:Q22183]
WBGene00000697	col-123	112.757	0.139438	1.49198	0.0934584	0.925539	1	COLlagen [Source:UniProtKB/TrEMBL;Acc:Q23222]
WBGene00000698	col-124	5402.25	0.555533	0.693134	0.80148	0.422854	1	COLlagen [Source:UniProtKB/TrEMBL;Acc:Q9NAR3]
WBGene00000699	col-125	13545.1	-1.05097	1.12315	-0.935734	0.34941	1	COLlagen [Source:UniProtKB/TrEMBL;Acc:Q18302]
WBGene00000700	col-126	0.451359	-1.49231	5.24733	-0.284395	0.776108	1	COLlagen [Source:UniProtKB/TrEMBL;Acc:G5EFU8]
WBGene00000701	col-127	0.197862	0	5.26765	0	1	1	COLlagen [Source:UniProtKB/TrEMBL;Acc:G5EFU8]
WBGene00000702	col-128	167.319	-0.455331	0.651291	-0.699122	0.484476	1	COLlagen [Source:UniProtKB/TrEMBL;Acc:Q19368]
WBGene00000703	col-129	365.663	-1.03163	0.643146	-1.60404	0.108705	1	COLlagen [Source:UniProtKB/TrEMBL;Acc:Q21556]
WBGene00000704	col-130	1969.49	-1.05221	1.13166	-0.929795	0.352477	1	COLlagen [Source:UniProtKB/TrEMBL;Acc:Q19218]
WBGene00000705	col-131	81.5841	-1.16408	0.864185	-1.34702	0.177973	1	COLlagen [Source:UniProtKB/TrEMBL;Acc:Q18537]
WBGene00000706	col-132	20.8741	-0.567427	0.678272	-0.836577	0.40283	1	COLlagen [Source:UniProtKB/TrEMBL;Acc:Q18536]
WBGene00000707	col-133	1399.35	-1.3309	1.49248	-0.891734	0.372535	1	COLlagen [Source:UniProtKB/TrEMBL;Acc:Q9XUE9]
WBGene00000708	col-135	27.8813	1.02264	0.587547	1.74053	0.0817657	1	COLlagen [Source:UniProtKB/TrEMBL;Acc:Q86D04]
WBGene00000709	col-136	3.30535	-3.44509	1.4932	-2.30718	0.0210447	1
WBGene00000710	col-137	37.7987	-0.919908	0.738026	-1.24644	0.212602	1	COLlagen [Source:UniProtKB/TrEMBL;Acc:Q9NAE0]
WBGene00000711	col-138	1232.97	-1.63357	1.50131	-1.0881	0.276552	1	COLlagen [Source:UniProtKB/TrEMBL;Acc:A3QM98]
WBGene00000712	col-139	359.241	-1.06435	0.624612	-1.70402	0.0883778	1	COLlagen [Source:UniProtKB/TrEMBL;Acc:Q20282]
WBGene00000713	col-140	16531.1	0.554384	0.485523	1.14183	0.253525	1	COLlagen [Source:UniProtKB/TrEMBL;Acc:Q19813]
WBGene00000714	col-141	74.7051	-1.0258	0.757137	-1.35484	0.175469	1	COLlagen [Source:UniProtKB/TrEMBL;Acc:O17035]
WBGene00000715	col-142	551.269	-0.645646	0.603592	-1.06967	0.284766	1	COLlagen [Source:UniProtKB/TrEMBL;Acc:O17036]
WBGene00000716	col-143	14709.8	0.792576	0.616819	1.28494	0.198813	1	COLlagen [Source:UniProtKB/TrEMBL;Acc:O17038]
WBGene00000717	col-144	3490.18	-1.52433	0.925154	-1.64765	0.0994242	1	COLlagen [Source:UniProtKB/TrEMBL;Acc:Q17458]
WBGene00000718	col-145	1804.9	-1.11295	1.43291	-0.776706	0.437332	1	Putative cuticle collagen 145 [Source:UniProtKB/Swiss-Prot;Acc:Q17459]
WBGene00000719	col-146	1100.69	-1.11065	1.34215	-0.827515	0.407945	1	COLlagen [Source:UniProtKB/TrEMBL;Acc:Q22260]
WBGene00000720	col-147	4949.25	-1.08148	1.27562	-0.847806	0.396546	1	COLlagen [Source:UniProtKB/TrEMBL;Acc:Q22256]
WBGene00000721	col-148	1.32551	-1.17503	2.00078	-0.587286	0.557011	1	COLlagen [Source:UniProtKB/TrEMBL;Acc:Q17939]
WBGene00000722	col-149	1803.51	-1.06563	0.719508	-1.48106	0.138591	1	COLlagen [Source:UniProtKB/TrEMBL;Acc:Q17417]
WBGene00000723	col-150	151.49	-0.642723	0.625424	-1.02766	0.30411	1	COLlagen [Source:UniProtKB/TrEMBL;Acc:Q17418]
WBGene00000724	col-151	7.63361	0.742557	0.902774	0.822528	0.410776	1	COLlagen [Source:UniProtKB/TrEMBL;Acc:Q17402]
WBGene00000725	col-152	14.1577	-0.535222	0.86748	-0.616985	0.537245	1	COLlagen [Source:UniProtKB/TrEMBL;Acc:Q19979]
WBGene00000726	col-153	139.554	-0.175494	0.39974	-0.43902	0.660647	1	COLlagen [Source:UniProtKB/TrEMBL;Acc:Q19514]
WBGene00000727	col-154	280.189	-0.537233	0.755809	-0.710806	0.477205	1	COLlagen [Source:UniProtKB/TrEMBL;Acc:Q20805]
WBGene00000728	col-155	258.857	-0.565547	0.538826	-1.04959	0.293906	1	Putative cuticle collagen 155 [Source:UniProtKB/Swiss-Prot;Acc:Q21184]
WBGene00000729	col-156	1113.88	-1.45886	1.43461	-1.01691	0.309199	1	COLlagen [Source:UniProtKB/TrEMBL;Acc:Q20927]
WBGene00000730	col-157	711.206	-0.540585	1.24451	-0.434375	0.664016	1	COLlagen [Source:UniProtKB/TrEMBL;Acc:Q22393]
WBGene00000731	col-158	1104.25	0.0613671	0.939758	0.0653009	0.947934	1	COLlagen [Source:UniProtKB/TrEMBL;Acc:O17734]
WBGene00000732	col-159	2700.35	-0.69382	0.886701	-0.782473	0.433936	1	COLlagen [Source:UniProtKB/TrEMBL;Acc:Q20922]
WBGene00000733	col-160	9608.43	-0.405641	0.539655	-0.751667	0.452251	1	COLlagen [Source:UniProtKB/TrEMBL;Acc:Q20921]
WBGene00000734	col-161	1577.9	-1.09154	1.45168	-0.75191	0.452105	1	COLlagen [Source:UniProtKB/TrEMBL;Acc:O17686]
WBGene00000735	col-162	1026.84	-1.02997	1.43324	-0.718631	0.472368	1	COLlagen [Source:UniProtKB/TrEMBL;Acc:Q9U2P5]
WBGene00000736	col-163	39.0631	-0.711573	0.757574	-0.939278	0.347588	1	COLlagen [Source:UniProtKB/TrEMBL;Acc:Q86D09]
WBGene00000737	col-164	51.301	-0.406945	1.21993	-0.33358	0.738696	1	COLlagen [Source:UniProtKB/TrEMBL;Acc:Q22651]
WBGene00000738	col-165	7.04458	-0.74333	1.13207	-0.65661	0.511432	1	COLlagen [Source:UniProtKB/TrEMBL;Acc:Q966K5]
WBGene00000739	col-166	10613.2	-0.807355	0.7887	-1.02365	0.305999	1	COLlagen [Source:UniProtKB/TrEMBL;Acc:Q86FL7]
WBGene00000740	col-167	3926.54	-1.03511	0.869556	-1.19039	0.233892	1	COLlagen [Source:UniProtKB/TrEMBL;Acc:Q22379]
WBGene00000741	col-168	1074.58	-0.587306	1.16312	-0.504941	0.6136	1	COLlagen [Source:UniProtKB/TrEMBL;Acc:Q22380]
WBGene00000742	col-169	2292.57	-1.11399	1.14039	-0.976851	0.328643	1	COLlagen [Source:UniProtKB/TrEMBL;Acc:Q86NE4]
WBGene00000743	col-170	479.307	-1.36713	1.32978	-1.02809	0.303908	1	COLlagen [Source:UniProtKB/TrEMBL;Acc:Q86NE3]
WBGene00000744	col-171	1.4235	-1.75767	1.95239	-0.900267	0.367978	1	COLlagen [Source:UniProtKB/TrEMBL;Acc:Q86NE2]
WBGene00000745	col-172	161.642	-0.991294	0.846737	-1.17072	0.24171	1	COLlagen [Source:UniProtKB/TrEMBL;Acc:Q7YZV5]
WBGene00000746	col-173	520.529	-0.828478	0.758991	-1.09155	0.27503	1	COLlagen [Source:UniProtKB/TrEMBL;Acc:Q20270]
WBGene00000747	col-174	148.997	-1.17172	0.880808	-1.33027	0.183428	1	COLlagen [Source:UniProtKB/TrEMBL;Acc:Q9GYP3]
WBGene00000748	col-175	680.793	-1.6223	1.57541	-1.02976	0.303123	1	COLlagen [Source:UniProtKB/TrEMBL;Acc:Q18480]
WBGene00000749	col-176	4310.16	-1.50273	1.21128	-1.24062	0.214747	1	COLlagen [Source:UniProtKB/TrEMBL;Acc:Q23263]
WBGene00000751	col-178	5176.22	0.286491	0.461816	0.620358	0.535022	1	COLlagen [Source:UniProtKB/TrEMBL;Acc:O17641]
WBGene00000752	col-179	475.08	0.302697	0.493624	0.613214	0.539735	1	COLlagen [Source:UniProtKB/TrEMBL;Acc:O17642]
WBGene00000753	col-180	3160.51	-0.848741	1.37851	-0.615693	0.538097	1	COLlagen [Source:UniProtKB/TrEMBL;Acc:Q18620]
WBGene00000754	col-181	26627	0.770785	0.452388	1.70382	0.0884156	1	COLlagen [Source:UniProtKB/TrEMBL;Acc:Q23150]
WBGene00000755	col-182	188.003	-1.1408	0.896465	-1.27256	0.203176	1	COLlagen [Source:UniProtKB/TrEMBL;Acc:Q21855]
WBGene00000756	col-183	436.713	0.96868	0.915742	1.05781	0.290142	1	COLlagen [Source:UniProtKB/TrEMBL;Acc:Q19111]
WBGene00000757	col-184	15017.3	0.699088	0.472981	1.47805	0.139395	1	COLlagen [Source:UniProtKB/TrEMBL;Acc:Q19470]
WBGene00000758	col-185	40.8618	1.24046	1.57658	0.786806	0.431396	1	COLlagen [Source:UniProtKB/TrEMBL;Acc:Q7YXA3]
WBGene00000759	col-186	102.974	-0.488459	0.539152	-0.905976	0.364948	1	COLlagen [Source:UniProtKB/TrEMBL;Acc:Q19050]
WBGene00000760	col-187	15.6574	-0.773935	0.631558	-1.22544	0.22041	1	COLlagen [Source:UniProtKB/TrEMBL;Acc:Q18327]
WBGene00000761	coq-1	1489.18	0.0996515	0.206544	0.482472	0.629471	1	COenzyme Q (Ubiquinone) biosynthesis [Source:UniProtKB/TrEMBL;Acc:P91093]
WBGene00000762	coq-2	1052.7	0.142028	0.174701	0.812976	0.416232	1	4-hydroxybenzoate polyprenyltransferase, mitochondrial [Source:UniProtKB/Swiss-Prot;Acc:Q8I7J4]
WBGene00000763	coq-3	945.958	-0.193489	0.37645	-0.513983	0.607264	1	Ubiquinone biosynthesis O-methyltransferase, mitochondrial [Source:UniProtKB/TrEMBL;Acc:O18235]
WBGene00000764	coq-4	704.858	0.0613089	0.184686	0.331964	0.739917	1	Ubiquinone biosynthesis protein coq-4, mitochondrial [Source:UniProtKB/Swiss-Prot;Acc:P91428]
WBGene00000765	coq-5	1738.23	0.0276456	0.191067	0.144691	0.884955	1	2-methoxy-6-polyprenyl-1,4-benzoquinol methylase, mitochondrial [Source:UniProtKB/Swiss-Prot;Acc:P34666]
WBGene00000766	coq-6	1484.78	0.116123	0.230469	0.503855	0.614363	1	Ubiquinone biosynthesis monooxygenase COQ6, mitochondrial [Source:UniProtKB/Swiss-Prot;Acc:O01884]
WBGene00000767	coq-8	1861.85	0.657325	0.400071	1.64302	0.100379	1	Atypical kinase coq-8, mitochondrial [Source:UniProtKB/Swiss-Prot;Acc:Q18486]
WBGene00000768	cor-1	618.67	-0.316129	0.42819	-0.738293	0.460337	1	Coronin-like protein cor-1 [Source:UniProtKB/Swiss-Prot;Acc:Q21624]
WBGene00000770	cpb-1	1411.45	0.660947	0.414993	1.59267	0.111234	1	Cytoplasmic polyadenylation element-binding protein 1 [Source:UniProtKB/Swiss-Prot;Acc:Q03571]
WBGene00000771	cpb-2	120.36	0.178817	0.637075	0.280684	0.778953	1	Cytoplasmic polyadenylation element-binding protein 2 [Source:UniProtKB/Swiss-Prot;Acc:Q18317]
WBGene00000772	cpb-3	3130.2	0.700099	0.466781	1.49984	0.133655	1	Cytoplasmic polyadenylation element-binding protein 3 [Source:UniProtKB/Swiss-Prot;Acc:O01835]
WBGene00000773	cpf-1	2784.68	0.164914	0.238388	0.691789	0.48907	1	Cleavage and Polyadenylation Factor [Source:UniProtKB/TrEMBL;Acc:Q19864]
WBGene00000774	cpf-2	1255.86	-0.338586	0.23564	-1.43688	0.150752	1	Cleavage and Polyadenylation Factor [Source:UniProtKB/TrEMBL;Acc:O45577]
WBGene00000775	cpin-1	352.832	0.17609	0.239321	0.735793	0.461857	1	CyPIN (Guanine aminohydrolase) homolog [Source:UniProtKB/TrEMBL;Acc:Q20166]
WBGene00000776	cpl-1	41469.7	0.204224	0.346801	0.588881	0.555941	1	CathePsin L family [Source:UniProtKB/TrEMBL;Acc:O45734]
WBGene00000777	cpn-1	9037.7	0.0359168	0.255879	0.140366	0.888371	1	CPN-1; CalPoNin [Source:UniProtKB/TrEMBL;Acc:G5EFB5]
WBGene00000778	cpn-2	469.815	-0.304535	0.360871	-0.843889	0.398731	1	CalPoNin [Source:UniProtKB/TrEMBL;Acc:A0A0K3AWU9]
WBGene00000779	cpn-3	9859.08	0.0105104	0.393915	0.0266819	0.978713	1	CalPoNin [Source:UniProtKB/TrEMBL;Acc:O01542]
WBGene00000780	cpn-4	2308.14	-0.18969	0.374664	-0.506295	0.612649	1	CalPoNin [Source:UniProtKB/TrEMBL;Acc:O44727]
WBGene00000781	cpr-1	8123.81	-0.268049	0.727885	-0.368257	0.712681	1	Gut-specific cysteine proteinase [Source:UniProtKB/Swiss-Prot;Acc:P25807]
WBGene00000782	cpr-2	322.89	2.98945	1.3061	2.28884	0.0220886	1	Cysteine PRotease related [Source:UniProtKB/TrEMBL;Acc:O45466]
WBGene00000783	cpr-3	1578.98	0.120838	0.383387	0.315186	0.75262	1	Cathepsin B-like cysteine proteinase 3 [Source:UniProtKB/Swiss-Prot;Acc:P43507]
WBGene00000784	cpr-4	17255.5	-0.0968817	0.567145	-0.170823	0.864363	1	Cathepsin B-like cysteine proteinase 4 [Source:UniProtKB/Swiss-Prot;Acc:P43508]
WBGene00000785	cpr-5	8369.03	-1.12609	0.914017	-1.23202	0.217941	1	Cathepsin B-like cysteine proteinase 5 [Source:UniProtKB/Swiss-Prot;Acc:P43509]
WBGene00000786	cpr-6	33749.2	0.361723	0.272	1.32986	0.183563	1	Cathepsin B-like cysteine proteinase 6 [Source:UniProtKB/Swiss-Prot;Acc:P43510]
WBGene00000787	cps-6	1667.43	-0.306211	0.299544	-1.02226	0.306658	1	Endonuclease G, mitochondrial [Source:UniProtKB/Swiss-Prot;Acc:Q95NM6]
WBGene00000788	cpz-1	12900.7	-0.138385	0.29345	-0.471581	0.637226	1	CathePsin Z; Cathepsin Z-like enzyme [Source:UniProtKB/TrEMBL;Acc:G5EGP8]
WBGene00000789	cpz-2	4802	0.295559	0.285598	1.03488	0.300726	1	CathePsin Z [Source:UniProtKB/TrEMBL;Acc:P92005]
WBGene00000792	crb-1	684.255	0.192324	0.319992	0.601027	0.547822	1	Drosophila CRumBs homolog [Source:UniProtKB/TrEMBL;Acc:Q19350]
WBGene00000793	crh-1	1066.93	-0.220346	0.331661	-0.664372	0.506452	1	CREB Homolog; Cyclic AMP-response element binding protein 1 gamma 2 [Source:UniProtKB/TrEMBL;Acc:G5EBL5]
WBGene00000794	crn-1	5163.94	0.295986	0.372756	0.794046	0.427169	1	Flap endonuclease 1 [Source:UniProtKB/Swiss-Prot;Acc:Q9N3T2]
WBGene00000795	crn-2	1902.41	-0.185483	0.400989	-0.462564	0.643677	1	Cell death-related nuclease 2; Cell-death-Related Nuclease [Source:UniProtKB/TrEMBL;Acc:G5EG18]
WBGene00000796	crn-3	2046.84	1.01579	0.511348	1.9865	0.0469776	1	Cell death-related nuclease 3; Cell-death-Related Nuclease [Source:UniProtKB/TrEMBL;Acc:G5EBX6]
WBGene00000797	crn-4	1333.37	-0.141213	0.280868	-0.502771	0.615125	1	Cell death-related nuclease 4 [Source:UniProtKB/Swiss-Prot;Acc:Q10905]
WBGene00000798	crn-5	974.958	-0.265196	0.387817	-0.683817	0.494091	1	Cell death-related nuclease 5; Cell-death-Related Nuclease [Source:UniProtKB/TrEMBL;Acc:G5EG59]
WBGene00000799	crn-6	956.572	0.421205	0.255697	1.64728	0.0994999	1	Cell death-related nuclease 6 [Source:UniProtKB/Swiss-Prot;Acc:P34508]
WBGene00000800	cars-1	6092.23	0.504044	0.320882	1.57081	0.116227	1	Cysteinyl Amino-acyl tRNA Synthetase [Source:UniProtKB/TrEMBL;Acc:O76618]
WBGene00000801	cars-2	396.813	-0.404628	0.313389	-1.29114	0.196657	1
WBGene00000802	crt-1	49394.6	-0.359881	0.235518	-1.52804	0.126502	1	Calreticulin [Source:UniProtKB/Swiss-Prot;Acc:P27798]
WBGene00000803	csb-1	881.074	0.441819	0.417463	1.05834	0.289899	1	CSB (Cockayne Syndrome B) homolog [Source:UniProtKB/TrEMBL;Acc:Q93781]
WBGene00000804	csc-1	6024.76	-0.658915	0.518883	-1.26987	0.20413	1	Chromosome segregation and cytokinesis defective protein 1 [Source:UniProtKB/Swiss-Prot;Acc:O45952]
WBGene00000812	csk-1	1972.19	0.156853	0.421951	0.371732	0.710092	1	Tyrosine-protein kinase csk-1 [Source:UniProtKB/Swiss-Prot;Acc:G5ECJ6]
WBGene00000813	csn-1	3028.44	0.284054	0.207396	1.36962	0.170805	1	COP9 signalosome complex subunit 1 [Source:UniProtKB/Swiss-Prot;Acc:Q9GS00]
WBGene00000814	csn-2	3400.41	0.344312	0.338639	1.01675	0.309271	1	COP9 signalosome complex subunit 2 [Source:UniProtKB/Swiss-Prot;Acc:O01422]
WBGene00000815	csn-3	2625.18	0.264563	0.412987	0.640609	0.521777	1	COP9 signalosome complex subunit 3 [Source:UniProtKB/Swiss-Prot;Acc:Q9N425]
WBGene00000816	csn-4	2777.41	0.159017	0.443612	0.35846	0.719999	1	COP9 signalosome complex subunit 4 [Source:UniProtKB/Swiss-Prot;Acc:Q9N359]
WBGene00000817	csn-5	3779.73	0.133676	0.208198	0.642063	0.520832	1	COP9 signalosome complex subunit 5 [Source:UniProtKB/Swiss-Prot;Acc:P91001]
WBGene00000818	csn-6	2721.45	0.208092	0.310406	0.670385	0.502613	1	COP9 signalosome complex subunit 6 [Source:UniProtKB/Swiss-Prot;Acc:Q95PZ0]
WBGene00000819	csp-1	23.2705	-0.0900403	0.568541	-0.158371	0.874165	1	Caspase A Caspase A subunit p16 Caspase A subunit p14 [Source:UniProtKB/Swiss-Prot;Acc:G5EBM1]
WBGene00000820	csp-2	28.7051	0.185469	0.381493	0.486166	0.626849	1	Putative inactive caspase B Putative inactive caspase B subunit p31 Putative inactive caspase B subunit p17 Putative inactive caspase subunit p14 [Source:UniProtKB/Swiss-Prot;Acc:Q9TZP5]
WBGene00000821	csp-3	5.70457	0.130548	0.828156	0.157637	0.874743	1	Non-catalytic caspase homolog csp-3 [Source:UniProtKB/Swiss-Prot;Acc:G5ECW5]
WBGene00000822	csq-1	5104.39	-0.0720722	0.328368	-0.219486	0.826271	1	Calsequestrin [Source:UniProtKB/TrEMBL;Acc:Q20203]
WBGene00000829	ctb-1	40819.1	-0.834362	0.517067	-1.61365	0.106604	1	Cytochrome b [Source:UniProtKB/Swiss-Prot;Acc:P24890]
WBGene00000830	ctl-1	14.2202	0.639462	0.568782	1.12427	0.2609	1	Catalase-2 [Source:UniProtKB/Swiss-Prot;Acc:O61235]
WBGene00000831	ctl-2	2233.01	0.0834202	0.313573	0.266032	0.790215	1	Peroxisomal catalase 1 [Source:UniProtKB/Swiss-Prot;Acc:Q27487]
WBGene00000832	ctn-1	1668.6	-0.372133	0.278529	-1.33607	0.181528	1	Alpha-CaTuliN (Catenin/vinculin related) [Source:UniProtKB/TrEMBL;Acc:H2L012]
WBGene00000833	cts-1	21803.6	0.0416569	0.219719	0.189592	0.849629	1	Probable citrate synthase, mitochondrial [Source:UniProtKB/Swiss-Prot;Acc:P34575]
WBGene00000834	cua-1	2562	0.320972	0.317489	1.01097	0.31203	1	CU (Copper) ATPase; Copper transporting ATPase [Source:UniProtKB/TrEMBL;Acc:G5EE14]
WBGene00000835	cuc-1	1676.86	-0.621612	0.402677	-1.5437	0.122662	1	CU (Copper) Chaperonin; Copper chaperone [Source:UniProtKB/TrEMBL;Acc:G5EE41]
WBGene00000836	cul-1	4296.79	0.22706	0.359915	0.630871	0.528125	1	Cullin-1 [Source:UniProtKB/Swiss-Prot;Acc:Q17389]
WBGene00000837	cul-2	6415.63	0.142733	0.312046	0.457409	0.647377	1	Cullin-2 [Source:UniProtKB/Swiss-Prot;Acc:Q17390]
WBGene00000838	cul-3	6209.17	0.439762	0.407837	1.07828	0.28091	1	Cullin-3 [Source:UniProtKB/Swiss-Prot;Acc:Q17391]
WBGene00000839	cul-4	1984.39	0.793767	0.379149	2.09355	0.0363005	1	Cullin-4 [Source:UniProtKB/Swiss-Prot;Acc:Q17392]
WBGene00000840	cul-5	1880.07	0.453339	0.296773	1.52756	0.126622	1	Cullin-5 [Source:UniProtKB/Swiss-Prot;Acc:Q23639]
WBGene00000841	cul-6	224.516	0.409524	0.463154	0.884208	0.376584	1	Cullin-6 [Source:UniProtKB/Swiss-Prot;Acc:Q21346]
WBGene00000843	cup-2	3896.36	-0.20507	0.209988	-0.976581	0.328776	1	Derlin-1 [Source:UniProtKB/Swiss-Prot;Acc:Q93561]
WBGene00000845	cup-4	250.051	0.0736684	0.354949	0.207547	0.835583	1	Acetylcholine receptor-like protein cup-4 [Source:UniProtKB/Swiss-Prot;Acc:P34271]
WBGene00000846	cup-5	2323.38	0.138314	0.330862	0.418041	0.675917	1	CUP-5L [Source:UniProtKB/TrEMBL;Acc:Q8T666]
WBGene00000851	cut-1	282.334	0.0671791	1.38639	0.048456	0.961353	1	Cuticlin-1 [Source:UniProtKB/Swiss-Prot;Acc:Q03755]
WBGene00000853	cut-6	131.525	-0.348716	0.450869	-0.773432	0.439267	1	CUTiclin [Source:UniProtKB/TrEMBL;Acc:Q21540]
WBGene00000854	cux-7	1188.02	0.559572	0.448811	1.24679	0.212476	1	Clk-2 Upstream, human gene XE7 related [Source:UniProtKB/TrEMBL;Acc:Q95YE8]
WBGene00000857	cwn-1	814.817	0.0178378	0.251317	0.0709771	0.943416	1
WBGene00000858	cwn-2	293.085	0.103627	0.391503	0.264689	0.791249	1
WBGene00000859	cwp-1	1.15737	3.01076	2.25683	1.33407	0.182182	1	Coexpressed With Polycystins [Source:UniProtKB/TrEMBL;Acc:P91138]
WBGene00000860	cwp-2	2.54206	-0.967289	1.24053	-0.779735	0.435547	1	Coexpressed With Polycystins [Source:UniProtKB/TrEMBL;Acc:P91139]
WBGene00000861	cwp-3	2.26339	-1.28528	1.34818	-0.95335	0.340413	1	Coexpressed With Polycystins [Source:UniProtKB/TrEMBL;Acc:P91140]
WBGene00000862	cwp-4	42.9222	-0.0891022	0.375423	-0.237338	0.812394	1	Coexpressed With Polycystins [Source:UniProtKB/TrEMBL;Acc:O44626]
WBGene00000863	cya-1	2849.92	0.266318	0.323235	0.823916	0.409987	1	G2/mitotic-specific cyclin-A1 [Source:UniProtKB/Swiss-Prot;Acc:P34638]
WBGene00000864	cya-2	19.767	-0.450711	0.622792	-0.723694	0.469253	1	CYclin A [Source:UniProtKB/TrEMBL;Acc:Q7Z134]
WBGene00000865	cyb-1	12034.8	0.0403056	0.288425	0.139744	0.888862	1	G2/mitotic-specific cyclin-B1 [Source:UniProtKB/Swiss-Prot;Acc:Q10653]
WBGene00000866	cyb-2.1	1884.56	-0.172574	0.52023	-0.331726	0.740096	1	CYclin B [Source:UniProtKB/TrEMBL;Acc:O45926]
WBGene00000867	cyb-2.2	3216.12	-0.184531	0.492887	-0.374388	0.708116	1	CYclin B [Source:UniProtKB/TrEMBL;Acc:Q9BLB5]
WBGene00000868	cyb-3	29500.1	-0.0559266	0.284731	-0.196419	0.844282	1	G2/mitotic-specific cyclin-B3 [Source:UniProtKB/Swiss-Prot;Acc:Q10654]
WBGene00000869	cyc-1	13079.7	-0.327271	0.263004	-1.24436	0.213368	1	CYtochrome C [Source:UniProtKB/TrEMBL;Acc:Q18853]
WBGene00000870	cyd-1	2000.91	-0.359111	0.40209	-0.893111	0.371797	1	G1/S-specific cyclin-D [Source:UniProtKB/Swiss-Prot;Acc:Q9U2M5]
WBGene00000871	cye-1	4079.3	0.673727	0.444541	1.51556	0.129631	1	G1/S-specific cyclin-E [Source:UniProtKB/Swiss-Prot;Acc:O01501]
WBGene00000872	cyk-1	1792.71	0.609518	0.289425	2.10596	0.0352077	1	CYtoKinesis defect [Source:UniProtKB/TrEMBL;Acc:H2KYI3]
WBGene00000874	cyk-3	2834.43	0.413022	0.365308	1.13061	0.258218	1	CYtoKinesis defect; Ubiquitin c-terminal hydrolase [Source:UniProtKB/TrEMBL;Acc:G5EDU8]
WBGene00000875	cyk-4	8444.24	0.0689759	0.250741	0.275088	0.783248	1	CYtoKinesis defect [Source:UniProtKB/TrEMBL;Acc:Q9XUS9]
WBGene00000876	cyl-1	2478.43	0.26911	0.427067	0.630134	0.528607	1	CYclin L; Cyclin L [Source:UniProtKB/TrEMBL;Acc:G5EBX3]
WBGene00000877	cyn-1	6755.07	-0.0231242	0.555857	-0.0416009	0.966817	1	Peptidyl-prolyl cis-trans isomerase 1 [Source:UniProtKB/Swiss-Prot;Acc:P52009]
WBGene00000878	cyn-2	278.573	-0.283514	0.849945	-0.333568	0.738706	1	Peptidyl-prolyl cis-trans isomerase 2 [Source:UniProtKB/Swiss-Prot;Acc:P52010]
WBGene00000879	cyn-3	6687.32	-0.0476119	0.555176	-0.08576	0.931657	1	Peptidyl-prolyl cis-trans isomerase 3 [Source:UniProtKB/Swiss-Prot;Acc:P52011]
WBGene00000880	cyn-4	1436.7	0.490122	0.423149	1.15827	0.246753	1	Peptidyl-prolyl cis-trans isomerase 4 [Source:UniProtKB/Swiss-Prot;Acc:P52012]
WBGene00000881	cyn-5	22836.4	-0.536519	0.539032	-0.995339	0.319572	1	Peptidyl-prolyl cis-trans isomerase 5 [Source:UniProtKB/Swiss-Prot;Acc:P52013]
WBGene00000882	cyn-6	3612.05	-0.524353	0.766214	-0.684343	0.493759	1	Peptidyl-prolyl cis-trans isomerase 6 [Source:UniProtKB/Swiss-Prot;Acc:P52014]
WBGene00000883	cyn-7	43325.9	-0.406757	0.419017	-0.970742	0.331677	1	Peptidyl-prolyl cis-trans isomerase 7 [Source:UniProtKB/Swiss-Prot;Acc:P52015]
WBGene00000884	cyn-8	2251.04	0.0195911	0.374562	0.0523042	0.958286	1	Peptidyl-prolyl cis-trans isomerase 8 [Source:UniProtKB/Swiss-Prot;Acc:P52016]
WBGene00000885	cyn-9	1015.14	0.152536	0.361506	0.421947	0.673064	1	Peptidyl-prolyl cis-trans isomerase 9 [Source:UniProtKB/Swiss-Prot;Acc:Q09637]
WBGene00000886	cyn-10	1316.48	-0.0574818	0.409738	-0.140289	0.888432	1	Peptidyl-prolyl cis-trans isomerase 10 [Source:UniProtKB/Swiss-Prot;Acc:P52017]
WBGene00000887	cyn-11	3049.02	-0.0515299	0.327395	-0.157394	0.874934	1	Peptidyl-prolyl cis-trans isomerase 11 [Source:UniProtKB/Swiss-Prot;Acc:P52018]
WBGene00000888	cyn-12	2627.56	-0.113747	0.218193	-0.521312	0.60215	1	Peptidyl-prolyl cis-trans isomerase [Source:UniProtKB/TrEMBL;Acc:Q18445]
WBGene00000889	cyn-13	5187.9	-0.0480855	0.287183	-0.167438	0.867025	1	Peptidyl-prolyl cis-trans isomerase [Source:UniProtKB/TrEMBL;Acc:D3NQB1]
WBGene00000890	sig-7	1797.37	0.332322	0.308589	1.07691	0.281521	1	Peptidyl-prolyl cis-trans isomerase sig-7 [Source:UniProtKB/Swiss-Prot;Acc:G5EEW6]
WBGene00000891	cyn-15	2556.05	0.50997	0.309232	1.64915	0.0991169	1	CYclophyliN [Source:UniProtKB/TrEMBL;Acc:Q9U1Q3]
WBGene00000892	cyn-16	697.813	0.33716	0.567043	0.594593	0.552115	1	CYclophyliN [Source:UniProtKB/TrEMBL;Acc:Q9XXI7]
WBGene00000893	cyn-17	176.558	-0.411697	0.622745	-0.661101	0.508548	1	CYclophyliN [Source:UniProtKB/TrEMBL;Acc:A9D417]
WBGene00000894	dab-1	7467.2	0.409666	0.303053	1.3518	0.176441	1	DAB (Drosophila disabled) homolog [Source:UniProtKB/TrEMBL;Acc:A5JYR4]
WBGene00000895	dac-1	90.4166	-0.188304	0.383029	-0.491619	0.622989	1	DAChsund transcription factor homolog [Source:UniProtKB/TrEMBL;Acc:H2KY91]
WBGene00000896	dad-1	4842.83	-0.388824	0.301163	-1.29107	0.196678	1	Dolichyl-diphosphooligosaccharide--protein glycosyltransferase subunit dad-1 [Source:UniProtKB/Swiss-Prot;Acc:P52872]
WBGene00000897	daf-1	1205.31	-0.284113	0.187275	-1.51709	0.129245	1	Cell surface receptor daf-1 [Source:UniProtKB/Swiss-Prot;Acc:P20792]
WBGene00000898	daf-2	1306.61	0.807529	0.619048	1.30447	0.192074	1	Insulin-like receptor Insulin-like receptor subunit alpha Insulin-like receptor subunit beta [Source:UniProtKB/Swiss-Prot;Acc:Q968Y9]
WBGene00000899	daf-3	912.076	0.266087	0.287825	0.924477	0.355238	1	Dwarfin sma [Source:UniProtKB/TrEMBL;Acc:O17532]
WBGene00000900	daf-4	1357.66	-0.148087	0.277018	-0.534576	0.592943	1	Cell surface receptor daf-4 [Source:UniProtKB/Swiss-Prot;Acc:P50488]
WBGene00000901	daf-5	1574.36	-0.0730362	0.175606	-0.415909	0.677476	1	Abnormal DAuer Formation DAF-5, a Ski oncogene homolog involved in a neuronal TGF beta pathway (71.0 kD) (Daf-5) [Source:UniProtKB/TrEMBL;Acc:G5EDM7]
WBGene00000902	daf-6	195.962	-0.36479	0.389904	-0.93559	0.349485	1
WBGene00000903	daf-7	476.08	-0.281779	0.441938	-0.637599	0.523735	1	Dauer larva development regulatory growth factor daf-7 [Source:UniProtKB/Swiss-Prot;Acc:P92172]
WBGene00000904	daf-8	388.048	0.254773	0.447813	0.568927	0.569405	1	Dwarfin sma [Source:UniProtKB/TrEMBL;Acc:Q21733]
WBGene00000905	daf-9	135.846	-0.745499	0.646639	-1.15288	0.248958	1	Cytochrome P450 daf-9 [Source:UniProtKB/Swiss-Prot;Acc:H2KYS3]
WBGene00000906	daf-10	29.8469	0.628882	0.505202	1.24481	0.213201	1	Intraflagellar transport protein 122 homolog [Source:UniProtKB/Swiss-Prot;Acc:G5EFW7]
WBGene00000907	daf-11	21.8864	0.808389	0.573235	1.41022	0.158473	1	Receptor-type guanylate cyclase daf-11 [Source:UniProtKB/Swiss-Prot;Acc:Q8I4N4]
WBGene00000908	daf-12	782.74	0.0134983	0.327331	0.0412375	0.967107	1	Nuclear hormone receptor family member daf-12 [Source:UniProtKB/Swiss-Prot;Acc:G5EFF5]
WBGene00000910	daf-14	687.845	-0.00191453	0.316	-0.00605864	0.995166	1	Smad protein [Source:UniProtKB/TrEMBL;Acc:G5EEP2]
WBGene00000912	daf-16	4565.72	0.229669	0.311527	0.737238	0.460978	1	Forkhead box protein O [Source:UniProtKB/Swiss-Prot;Acc:O16850]
WBGene00000913	daf-18	8470.35	0.415926	0.524717	0.792667	0.427972	1	Phosphatidylinositol 3,4,5-trisphosphate 3-phosphatase and dual-specificity protein phosphatase daf-18 [Source:UniProtKB/Swiss-Prot;Acc:G5EE01]
WBGene00000914	daf-19	472.249	0.16921	0.340956	0.49628	0.619697	1	RFX-like transcription factor daf-19 [Source:UniProtKB/Swiss-Prot;Acc:Q09555]
WBGene00000915	daf-21	70478.5	-0.0830762	0.208926	-0.397634	0.6909	1	Heat shock protein 90 [Source:UniProtKB/Swiss-Prot;Acc:Q18688]
WBGene00000917	daf-25	1643.17	-0.0873185	0.150782	-0.579103	0.56252	1	Dauer abnormal formation protein 25 [Source:UniProtKB/Swiss-Prot;Acc:Q9N3Q8]
WBGene00000920	daf-28	265.134	-0.559543	0.503182	-1.11201	0.266135	1
WBGene00000923	daf-31	3657.92	0.0923322	0.193119	0.478111	0.632571	1	N-alpha-acetyltransferase daf-31 [Source:UniProtKB/Swiss-Prot;Acc:O61219]
WBGene00000928	dao-2	9111.28	-0.635691	0.724132	-0.877867	0.380016	1	Dauer or Aging adult Overexpression [Source:UniProtKB/TrEMBL;Acc:Q86LS4]
WBGene00000929	dao-3	2432.58	0.0193149	0.172015	0.112286	0.910596	1	Dauer or Aging adult Overexpression [Source:UniProtKB/TrEMBL;Acc:Q21285]
WBGene00000930	dao-4	99.528	-1.04193	1.04502	-0.997039	0.318745	1	Dauer or Aging adult Overexpression [Source:UniProtKB/TrEMBL;Acc:Q23262]
WBGene00000931	dao-5	6219.84	0.336216	0.228907	1.46879	0.14189	1	Dauer or Aging adult Overexpression [Source:UniProtKB/TrEMBL;Acc:Q9XVS4]
WBGene00000932	dao-6	154.597	-1.0204	0.469169	-2.17491	0.0296371	1	Dauer or Aging adult Overexpression [Source:UniProtKB/TrEMBL;Acc:Q8MPY0]
WBGene00000933	dap-3	2481.03	0.105281	0.21151	0.497757	0.618655	1	Mammalian cell Death Associated Protein related; Putative uncharacterized protein [Source:UniProtKB/TrEMBL;Acc:G5EFC8]
WBGene00000934	dat-1	85.7834	-0.246482	0.413895	-0.59552	0.551496	1	Sodium-dependent dopamine transporter [Source:UniProtKB/Swiss-Prot;Acc:Q03614]
WBGene00000935	daz-1	5128.32	0.540607	0.430504	1.25575	0.209206	1	DAZ protein 1 [Source:UniProtKB/Swiss-Prot;Acc:Q20870]
WBGene00000936	dbl-1	321.384	-0.672301	0.362893	-1.85261	0.0639379	1	DPP/BMP-Like; Decapentaplegic protein homolog [Source:UniProtKB/TrEMBL;Acc:G5EEL5]
WBGene00000937	dbr-1	1308.18	0.707588	0.480514	1.47257	0.140868	1	Lariat debranching enzyme [Source:UniProtKB/Swiss-Prot;Acc:Q966M6]
WBGene00000938	dcp-66	1309.3	0.631993	0.529519	1.19352	0.232664	1	Deacetylase Complex Protein [Source:UniProtKB/TrEMBL;Acc:G5ED89]
WBGene00000939	dcr-1	2516.83	0.862515	0.376412	2.29142	0.0219394	1	Endoribonuclease dcr-1 [Source:UniProtKB/Swiss-Prot;Acc:P34529]
WBGene00000940	dcs-1	2060.48	-0.220906	0.161997	-1.36364	0.172682	1	m7GpppX diphosphatase [Source:UniProtKB/Swiss-Prot;Acc:G5EFS4]
WBGene00000941	ddp-1	2661.27	-0.778333	0.592075	-1.31459	0.188649	1	Mitochondrial import inner membrane translocase subunit Tim8 [Source:UniProtKB/Swiss-Prot;Acc:Q9N408]
WBGene00000942	deb-1	2437.82	0.0688975	0.260689	0.26429	0.791556	1	Vinculin [Source:UniProtKB/Swiss-Prot;Acc:P19826]
WBGene00000950	deg-1	68.4542	-0.104577	0.258345	-0.404794	0.685629	1	Degenerin deg-1 [Source:UniProtKB/Swiss-Prot;Acc:P24585]
WBGene00000951	deg-3	147.158	-0.140174	0.410729	-0.341281	0.732892	1	Acetylcholine receptor subunit alpha-type deg-3 [Source:UniProtKB/Swiss-Prot;Acc:P54244]
WBGene00000952	del-1	46.0431	-0.450322	0.366334	-1.22927	0.218971	1	Degenerin del-1 [Source:UniProtKB/Swiss-Prot;Acc:Q19038]
WBGene00000953	del-2	46.1951	0.234539	0.457452	0.512707	0.608156	1	DEgenerin Like [Source:UniProtKB/TrEMBL;Acc:G5ECD8]
WBGene00000955	des-2	135.318	-0.205206	0.30469	-0.67349	0.500636	1	Acetylcholine receptor subunit alpha-type des-2 [Source:UniProtKB/Swiss-Prot;Acc:O76554]
WBGene00000958	dgk-1	263.106	-0.284142	0.287166	-0.989469	0.322434	1	Diacylglycerol kinase [Source:UniProtKB/TrEMBL;Acc:Q7JNZ1]
WBGene00000959	dgk-2	2153.82	-0.410719	0.346385	-1.18573	0.235729	1	Diacylglycerol kinase [Source:UniProtKB/TrEMBL;Acc:H2KYI9]
WBGene00000960	dgk-3	20.7455	0.55857	0.501944	1.11281	0.265789	1	Probable diacylglycerol kinase 3 [Source:UniProtKB/Swiss-Prot;Acc:Q03603]
WBGene00000961	dgn-1	1608.02	0.342028	0.286666	1.19312	0.232822	1	DystroGlycaN [Source:UniProtKB/TrEMBL;Acc:Q22629]
WBGene00000963	dhp-1	370.029	0.0732563	0.338446	0.216449	0.828638	1	Dihydropyrimidinase 1 [Source:UniProtKB/Swiss-Prot;Acc:Q21773]
WBGene00000964	dhp-2	432.732	0.00506039	0.341913	0.0148002	0.988192	1	Dihydropyrimidinase 2 [Source:UniProtKB/Swiss-Prot;Acc:Q18677]
WBGene00000965	dhs-1	2235.14	0.191427	0.3358	0.570062	0.568635	1	DeHydrogenases, Short chain [Source:UniProtKB/TrEMBL;Acc:P91013]
WBGene00000966	dhs-2	286.603	0.110578	0.358172	0.30873	0.757527	1	DeHydrogenases, Short chain [Source:UniProtKB/TrEMBL;Acc:O01758]
WBGene00000967	dhs-3	2948.29	0.22367	0.285167	0.78435	0.432835	1	DeHydrogenases, Short chain [Source:UniProtKB/TrEMBL;Acc:A5JYX4]
WBGene00000968	dhs-4	223.739	0.101859	0.224172	0.454376	0.649558	1	DeHydrogenases, Short chain [Source:UniProtKB/TrEMBL;Acc:O18030]
WBGene00000969	dhs-5	819.743	-0.0165342	0.191672	-0.0862628	0.931257	1	Uncharacterized oxidoreductase dhs-5 [Source:UniProtKB/Swiss-Prot;Acc:Q10130]
WBGene00000970	dhs-6	2892.64	0.294623	0.249039	1.18304	0.236793	1	DeHydrogenases, Short chain [Source:UniProtKB/TrEMBL;Acc:Q09979]
WBGene00000971	dhs-7	194.914	0.790892	0.394769	2.00343	0.045131	1	DeHydrogenases, Short chain [Source:UniProtKB/TrEMBL;Acc:Q19062]
WBGene00000972	dhs-8	285.05	-0.061348	0.461856	-0.132829	0.894328	1	DeHydrogenases, Short chain [Source:UniProtKB/TrEMBL;Acc:U4PLQ0]
WBGene00000973	dhs-9	2174.07	0.136315	0.279472	0.48776	0.62572	1	DeHydrogenases, Short chain [Source:UniProtKB/TrEMBL;Acc:Q9N538]
WBGene00000974	dhs-11	1803.04	0.279508	0.457568	0.610855	0.541295	1	DeHydrogenases, Short chain [Source:UniProtKB/TrEMBL;Acc:A0A168H2Z9]
WBGene00000975	dhs-12	2894.34	0.148533	0.344751	0.430841	0.666584	1	DeHydrogenases, Short chain [Source:UniProtKB/TrEMBL;Acc:G5EG13]
WBGene00000976	dhs-13	5350.98	-0.142518	0.33154	-0.429867	0.667293	1	DeHydrogenases, Short chain [Source:UniProtKB/TrEMBL;Acc:O16619]
WBGene00000977	dhs-14	926.62	0.192337	0.369188	0.520973	0.602385	1	DeHydrogenases, Short chain [Source:UniProtKB/TrEMBL;Acc:Q9N5G3]
WBGene00000978	dhs-15	57.8482	-0.598168	0.450972	-1.3264	0.184708	1	DeHydrogenases, Short chain [Source:UniProtKB/TrEMBL;Acc:Q9N5G1]
WBGene00000979	dhs-16	93.6088	-0.710388	0.312435	-2.27372	0.022983	1	3 beta-hydroxysteroid dehydrogenase dhs-16 [Source:UniProtKB/Swiss-Prot;Acc:O16881]
WBGene00000980	dhs-17	398.834	-0.154354	0.284927	-0.541731	0.588004	1	DeHydrogenases, Short chain [Source:UniProtKB/TrEMBL;Acc:Q1XFZ3]
WBGene00000981	dhs-18	647.19	-0.0842361	0.361028	-0.233323	0.815511	1	DeHydrogenases, Short chain [Source:UniProtKB/TrEMBL;Acc:Q18639]
WBGene00000982	dhs-19	967.899	0.266676	0.371158	0.718497	0.472451	1	DeHydrogenases, Short chain [Source:UniProtKB/TrEMBL;Acc:Q22392]
WBGene00000983	dhs-20	352.327	0.249611	0.427896	0.583345	0.559661	1	DeHydrogenases, Short chain [Source:UniProtKB/TrEMBL;Acc:Q20012]
WBGene00000984	dhs-21	856.711	0.0151305	0.336009	0.0450301	0.964083	1	L-xylulose reductase [Source:UniProtKB/Swiss-Prot;Acc:Q21929]
WBGene00000985	dhs-22	4361.64	0.0898371	0.247038	0.363656	0.716115	1	DeHydrogenases, Short chain [Source:UniProtKB/TrEMBL;Acc:Q9XVS9]
WBGene00000986	dhs-23	32.8243	-0.0525091	0.439695	-0.119422	0.904941	1	DeHydrogenases, Short chain [Source:UniProtKB/TrEMBL;Acc:O45709]
WBGene00000987	dhs-24	1486.8	-0.212936	0.334292	-0.636974	0.524142	1	DeHydrogenases, Short chain [Source:UniProtKB/TrEMBL;Acc:Q9U1Y6]
WBGene00000988	dhs-25	1892.6	-0.961828	0.62262	-1.54481	0.122393	1	DeHydrogenases, Short chain [Source:UniProtKB/TrEMBL;Acc:Q19246]
WBGene00000989	dhs-26	326.052	0.461728	0.646196	0.714532	0.474898	1	DeHydrogenases, Short chain [Source:UniProtKB/TrEMBL;Acc:Q23612]
WBGene00000990	dhs-27	798.354	-0.476706	0.338325	-1.40902	0.15883	1	Uncharacterized oxidoreductase dhs-27 [Source:RefSeq peptide;Acc:NP_508591]
WBGene00000991	dhs-28	4575.67	0.00359175	0.302045	0.0118915	0.990512	1	DeHydrogenases, Short chain [Source:UniProtKB/TrEMBL;Acc:Q21481]
WBGene00000992	dhs-29	875.807	-0.234112	0.41649	-0.562107	0.574043	1	DeHydrogenases, Short chain [Source:UniProtKB/TrEMBL;Acc:Q19843]
WBGene00000993	dhs-30	1305.8	-0.00109833	0.403029	-0.00272519	0.997826	1	DeHydrogenases, Short chain [Source:UniProtKB/TrEMBL;Acc:Q65ZI3]
WBGene00000994	dic-1	1139.5	0.433534	0.420466	1.03108	0.302504	1	DICE1 (Deleted In Cancer) homolog [Source:UniProtKB/TrEMBL;Acc:H2KZC8]
WBGene00000995	die-1	2733.47	0.366964	0.307632	1.19287	0.232921	1	Dorsal Intercalation and Elongation defect [Source:UniProtKB/TrEMBL;Acc:A0A131MCR4]
WBGene00000996	dif-1	5201.96	0.0642188	0.286581	0.224086	0.82269	1
WBGene00000998	dig-1	1011.61	0.661386	0.355741	1.85918	0.0630016	1	Mesocentin [Source:UniProtKB/Swiss-Prot;Acc:Q09165]
WBGene00001000	dim-1	7266.88	-0.226526	0.331271	-0.683808	0.494097	1	Disorganized muscle protein 1 [Source:UniProtKB/Swiss-Prot;Acc:Q18066]
WBGene00001001	dis-3	3047.39	0.654514	0.290323	2.25444	0.0241686	1	Probable exosome complex exonuclease RRP44 [Source:UniProtKB/Swiss-Prot;Acc:Q17632]
WBGene00001002	div-1	3397.82	0.0234611	0.226865	0.103414	0.917634	1	DNA polymerase alpha subunit B [Source:UniProtKB/Swiss-Prot;Acc:Q21625]
WBGene00001005	dlc-1	17121.5	-0.379866	0.386552	-0.982704	0.325753	1	Dynein light chain 1, cytoplasmic [Source:UniProtKB/Swiss-Prot;Acc:Q22799]
WBGene00001006	dlg-1	3239.72	-0.196885	0.294234	-0.669145	0.503403	1	Drosophila Discs LarGe homolog; MAGUK protein DLG-1; SAP97-like protein DLG-1 [Source:UniProtKB/TrEMBL;Acc:G5ECY0]
WBGene00001007	dli-1	4901.01	-0.146431	0.198389	-0.738099	0.460454	1	Dynein Light Intermediate chain [Source:UniProtKB/TrEMBL;Acc:G5ECK7]
WBGene00001008	dlk-1	1892.09	-0.088521	0.204473	-0.432924	0.66507	1	Mitogen-activated protein kinase kinase kinase dlk-1 [Source:UniProtKB/Swiss-Prot;Acc:O01700]
WBGene00001016	dna-2	2279.96	0.49012	0.371343	1.31986	0.186883	1	Yeast DNA helicase/endonuclease family [Source:UniProtKB/TrEMBL;Acc:Q9U3F2]
WBGene00001017	dnc-1	3445.23	0.720671	0.332116	2.16994	0.0300114	1	DyNactin Complex component [Source:UniProtKB/TrEMBL;Acc:E2JKY8]
WBGene00001018	dnc-2	2705.39	0.187254	0.441075	0.424541	0.671171	1	Probable dynactin subunit 2 [Source:UniProtKB/Swiss-Prot;Acc:Q09248]
WBGene00001019	dnj-1	2178.54	0.273673	0.362461	0.755042	0.450224	1	DnaJ homolog subfamily B member 1 [Source:UniProtKB/Swiss-Prot;Acc:Q17438]
WBGene00001020	dnj-2	1173.83	-0.183907	0.370606	-0.496233	0.61973	1	DnaJ homolog dnj-2 [Source:UniProtKB/Swiss-Prot;Acc:Q17433]
WBGene00001021	dnj-3	343.937	-0.0824153	0.208793	-0.394723	0.693048	1	DNaJ domain (Prokaryotic heat shock protein) [Source:UniProtKB/TrEMBL;Acc:Q93171]
WBGene00001022	dnj-4	508.154	0.0595654	0.426904	0.139529	0.889032	1	DNaJ domain (Prokaryotic heat shock protein) [Source:UniProtKB/TrEMBL;Acc:P91014]
WBGene00001023	dnj-5	9122.82	0.274245	0.464011	0.591032	0.554499	1	DnaJ homolog dnj-5 [Source:UniProtKB/Swiss-Prot;Acc:Q09446]
WBGene00001025	dnj-7	2125.23	0.0984787	0.222339	0.442921	0.657823	1	DNaJ domain (Prokaryotic heat shock protein) [Source:UniProtKB/TrEMBL;Acc:P91189]
WBGene00001026	dnj-8	1869.47	0.282591	0.420755	0.671629	0.50182	1	DNaJ domain (Prokaryotic heat shock protein) [Source:UniProtKB/TrEMBL;Acc:B2MZA7]
WBGene00001027	dnj-9	1710.35	0.0866751	0.187305	0.462747	0.643546	1	DNaJ domain (Prokaryotic heat shock protein) [Source:UniProtKB/TrEMBL;Acc:P91243]
WBGene00001028	dnj-10	1517.84	0.34982	0.384281	0.910323	0.362652	1	DnaJ homolog dnj-10 [Source:UniProtKB/Swiss-Prot;Acc:Q8TA83]
WBGene00001029	dnj-11	5037.89	0.821914	0.425677	1.93084	0.0535027	1	DNaJ domain (Prokaryotic heat shock protein) [Source:UniProtKB/TrEMBL;Acc:Q94216]
WBGene00001030	dnj-12	12136.6	0.197549	0.220558	0.895676	0.370426	1	DNaJ domain (Prokaryotic heat shock protein) [Source:UniProtKB/TrEMBL;Acc:O45502]
WBGene00001031	dnj-13	8746.42	-0.25482	0.150064	-1.69808	0.0894925	1	DNaJ domain (Prokaryotic heat shock protein) [Source:UniProtKB/TrEMBL;Acc:Q20774]
WBGene00001032	dnj-14	2152.31	0.0579875	0.164165	0.353228	0.723918	1	DNaJ domain (Prokaryotic heat shock protein) [Source:UniProtKB/TrEMBL;Acc:Q21162]
WBGene00001033	dnj-15	690.102	-0.0854821	0.30865	-0.276955	0.781815	1	DNaJ domain (Prokaryotic heat shock protein) [Source:UniProtKB/TrEMBL;Acc:Q21324]
WBGene00001034	dnj-16	2756.6	-0.063616	0.307825	-0.206663	0.836273	1	DNaJ domain (Prokaryotic heat shock protein) [Source:UniProtKB/TrEMBL;Acc:C1P627]
WBGene00001035	dnj-17	1335.52	0.877921	0.501114	1.75194	0.0797843	1	DNaJ domain (Prokaryotic heat shock protein) [Source:UniProtKB/TrEMBL;Acc:O62360]
WBGene00001036	dnj-18	509.614	-0.119693	0.452624	-0.264443	0.791438	1	DNaJ domain (Prokaryotic heat shock protein) [Source:UniProtKB/TrEMBL;Acc:Q22138]
WBGene00001037	dnj-19	9112.19	0.192259	0.326307	0.589197	0.555729	1	DNaJ domain (Prokaryotic heat shock protein) [Source:UniProtKB/TrEMBL;Acc:O16303]
WBGene00001038	dnj-20	6800.15	0.0167809	0.178899	0.0938008	0.925267	1	DnaJ homolog dnj-20 [Source:UniProtKB/Swiss-Prot;Acc:Q8MPX3]
WBGene00001039	dnj-21	1083.06	-0.207111	0.480649	-0.430899	0.666542	1	Mitochondrial import inner membrane translocase subunit TIM14 [Source:UniProtKB/Swiss-Prot;Acc:P91454]
WBGene00001040	dnj-22	2419.08	0.493249	0.392098	1.25797	0.208401	1	DNaJ domain (Prokaryotic heat shock protein) [Source:UniProtKB/TrEMBL;Acc:O17002]
WBGene00001041	dnj-23	4327.59	0.150536	0.280327	0.537001	0.591267	1	DNaJ domain (Prokaryotic heat shock protein) [Source:UniProtKB/TrEMBL;Acc:Q22751]
WBGene00001042	dnj-24	682.119	-0.0159414	0.211095	-0.075518	0.939803	1	DNaJ domain (Prokaryotic heat shock protein) [Source:UniProtKB/TrEMBL;Acc:Q9TY07]
WBGene00001043	dnj-25	1832.52	0.220891	0.354161	0.623701	0.532824	1	Auxilin; DNaJ domain (Prokaryotic heat shock protein) [Source:UniProtKB/TrEMBL;Acc:G5EDJ6]
WBGene00001044	dnj-26	382.018	0.451698	0.392998	1.14936	0.250406	1	DNaJ domain (Prokaryotic heat shock protein) [Source:UniProtKB/TrEMBL;Acc:Q9U2L4]
WBGene00001045	dnj-27	2054.17	-0.0314548	0.195243	-0.161106	0.87201	1	DNaJ domain (Prokaryotic heat shock protein) [Source:UniProtKB/TrEMBL;Acc:Q25AR9]
WBGene00001046	dnj-28	847.493	0.322859	0.469395	0.687819	0.491567	1	DNaJ domain (Prokaryotic heat shock protein) [Source:UniProtKB/TrEMBL;Acc:Q9N3E0]
WBGene00001047	dnj-29	5776.65	0.346036	0.29091	1.1895	0.234245	1	DNaJ domain (Prokaryotic heat shock protein) [Source:UniProtKB/TrEMBL;Acc:Q9U1W0]
WBGene00001048	dnj-30	1741.44	0.207606	0.346409	0.599308	0.548967	1	DNaJ domain (Prokaryotic heat shock protein) [Source:UniProtKB/TrEMBL;Acc:A0A078BS22]
WBGene00001049	dog-1	2156.48	0.256605	0.26162	0.980833	0.326675	1	Deletions Of G-rich DNA [Source:UniProtKB/TrEMBL;Acc:O62217]
WBGene00001050	dom-3	671.308	0.403939	0.482877	0.836525	0.402859	1	Decapping nuclease dom-3 [Source:UniProtKB/Swiss-Prot;Acc:Q10660]
WBGene00001051	cks-1	7125.92	0.134092	0.26441	0.507136	0.61206	1	Cyclin-dependent kinases regulatory subunit [Source:UniProtKB/Swiss-Prot;Acc:Q17868]
WBGene00001052	dop-1	111.56	-0.722941	0.38391	-1.8831	0.0596871	1	DOPamine receptor [Source:UniProtKB/TrEMBL;Acc:Q86ME4]
WBGene00001053	dop-2	121.47	0.169286	0.336992	0.502344	0.615426	1	D2-like dopamine receptor long variant; DOPamine receptor [Source:UniProtKB/TrEMBL;Acc:G5EBI6]
WBGene00001054	dpf-1	196.326	-0.0647405	0.336318	-0.192498	0.847352	1	Dipeptidyl peptidase family member 1 [Source:UniProtKB/Swiss-Prot;Acc:Q7JKY3]
WBGene00001055	dpf-2	654.374	0.733547	0.40062	1.83103	0.067096	1	Dipeptidyl peptidase family member 2 [Source:UniProtKB/Swiss-Prot;Acc:Q18253]
WBGene00001056	dpf-3	6027.36	0.295756	0.394783	0.74916	0.453761	1	Dipeptidyl Peptidase Four (IV) family [Source:UniProtKB/TrEMBL;Acc:Q965K3]
WBGene00001057	dpf-4	2684.45	0.434996	0.383702	1.13368	0.256928	1	Dipeptidyl Peptidase Four (IV) family [Source:UniProtKB/TrEMBL;Acc:Q19086]
WBGene00001058	dpf-5	6195.7	0.217321	0.232055	0.936506	0.349013	1	Dipeptidyl Peptidase Four (IV) family [Source:UniProtKB/TrEMBL;Acc:Q9TYX1]
WBGene00001059	dpf-6	473.624	-0.104359	0.319038	-0.327105	0.743589	1	Dipeptidyl peptidase family member 6 [Source:UniProtKB/Swiss-Prot;Acc:P34422]
WBGene00001060	dpf-7	2065.22	0.0440012	0.337015	0.130562	0.896122	1	Dipeptidyl Peptidase Four (IV) family [Source:UniProtKB/TrEMBL;Acc:H2L0B1]
WBGene00001061	dpl-1	2612.86	0.5878	0.377548	1.55689	0.119497	1	Transcription factor dpl-1 [Source:UniProtKB/Swiss-Prot;Acc:Q22703]
WBGene00001062	dpr-1	1.0433	-0.231277	2.04024	-0.113358	0.909747	1	Dauer Pheromone Responsive [Source:UniProtKB/TrEMBL;Acc:Q9XVK1]
WBGene00001063	dpy-1	495.838	-0.26055	0.358669	-0.726436	0.467572	1	DumPY: shorter than wild-type [Source:UniProtKB/TrEMBL;Acc:G4SNP7]
WBGene00001064	dpy-2	1750.23	-0.492892	0.653266	-0.754504	0.450547	1	Cuticle collagen dpy-2 [Source:UniProtKB/Swiss-Prot;Acc:P35799]
WBGene00001065	dpy-3	1580.16	-0.568704	0.715324	-0.79503	0.426596	1	DumPY: shorter than wild-type [Source:UniProtKB/TrEMBL;Acc:Q19079]
WBGene00001066	dpy-4	14236.1	-0.569041	0.868326	-0.655331	0.512255	1	DumPY: shorter than wild-type [Source:UniProtKB/TrEMBL;Acc:O62432]
WBGene00001067	dpy-5	12413.6	-0.896497	0.821513	-1.09127	0.275152	1	Cuticle collagen dpy-5 [Source:UniProtKB/Swiss-Prot;Acc:P91285]
WBGene00001068	dpy-6	399.481	0.14114	0.491052	0.287423	0.773788	1	DumPY: shorter than wild-type [Source:UniProtKB/TrEMBL;Acc:Q94185]
WBGene00001069	dpy-7	2317.57	-0.487069	0.697414	-0.698392	0.484932	1	Cuticle collagen dpy-7 [Source:UniProtKB/Swiss-Prot;Acc:P34688]
WBGene00001070	dpy-8	1598.33	-0.461486	0.709377	-0.650551	0.515336	1	DumPY: shorter than wild-type [Source:UniProtKB/TrEMBL;Acc:Q18345]
WBGene00001071	dpy-9	2327.25	-0.427566	0.710629	-0.601673	0.547392	1	DumPY: shorter than wild-type [Source:UniProtKB/TrEMBL;Acc:O16787]
WBGene00001072	dpy-10	1754.29	-0.54025	0.470431	-1.14842	0.250797	1	Cuticle collagen dpy-10 [Source:UniProtKB/Swiss-Prot;Acc:P35800]
WBGene00001073	dpy-11	9070.06	-0.100007	0.122331	-0.817509	0.413637	1	DumPY: shorter than wild-type; Thioredoxin-like protein DPY-11 [Source:UniProtKB/TrEMBL;Acc:G5EC91]
WBGene00001074	dpy-13	15268.4	-0.910657	0.849724	-1.07171	0.283851	1	Cuticle collagen dpy-13 [Source:UniProtKB/Swiss-Prot;Acc:P17657]
WBGene00001075	dpy-14	2873.23	-0.413156	0.571305	-0.72318	0.469569	1	COLlagen structural; DumPY: shorter than wild-type [Source:UniProtKB/TrEMBL;Acc:G5EEB6]
WBGene00001076	dpy-17	2760.22	-0.548446	0.716603	-0.765342	0.444068	1	DumPY: shorter than wild-type [Source:UniProtKB/TrEMBL;Acc:Q20778]
WBGene00001077	dpy-18	3280.14	-0.298757	0.311486	-0.959136	0.33749	1	Prolyl 4-hydroxylase subunit alpha-1 [Source:UniProtKB/Swiss-Prot;Acc:Q10576]
WBGene00001078	dpy-19	283.563	-0.16488	0.289269	-0.569989	0.568685	1	C-mannosyltransferase dpy-19 [Source:UniProtKB/Swiss-Prot;Acc:P34413]
WBGene00001079	dpy-20	106.79	-0.95299	0.584833	-1.62951	0.103205	1
WBGene00001080	dpy-21	1766.09	0.261924	0.331086	0.791106	0.428882	1	Dosage compensation protein dpy-21 [Source:UniProtKB/Swiss-Prot;Acc:Q9GRZ3]
WBGene00001081	dpy-22	1444.29	0.441739	0.33809	1.30657	0.191359	1	Mediator of RNA polymerase II transcription subunit 12 [Source:UniProtKB/Swiss-Prot;Acc:Q20497]
WBGene00001082	dpy-23	2128.36	-0.137717	0.161139	-0.85465	0.392745	1	AP-2 complex subunit mu [Source:UniProtKB/Swiss-Prot;Acc:P35603]
WBGene00001085	dpy-26	2597.47	0.641035	0.440004	1.45689	0.145148	1	Condensin complex subunit dpy-26 [Source:UniProtKB/Swiss-Prot;Acc:G5EGE9]
WBGene00001086	dpy-27	1557.49	0.498544	0.26537	1.87867	0.0602892	1	Chromosome condensation protein dpy-27 [Source:UniProtKB/Swiss-Prot;Acc:P48996]
WBGene00001087	dpy-28	2120.72	0.523193	0.330111	1.5849	0.112989	1	Condensin complex subunit 1 [Source:UniProtKB/Swiss-Prot;Acc:Q9U2M1]
WBGene00001088	dpy-30	8910.29	-0.49087	0.382839	-1.28218	0.199778	1	Dosage compensation protein dpy-30 [Source:UniProtKB/Swiss-Prot;Acc:Q10661]
WBGene00001089	dre-1	1723.96	-0.0794941	0.253566	-0.313504	0.753898	1	F-box protein dre-1 [Source:UniProtKB/Swiss-Prot;Acc:Q94251]
WBGene00001090	drh-1	926.455	0.714152	0.383514	1.86213	0.062585	1	Dicer Related Helicase; Dicer-related helicase [Source:UniProtKB/TrEMBL;Acc:G5EDI8]
WBGene00001091	drh-2	488.18	0.392519	0.536325	0.731867	0.46425	1
WBGene00001092	dro-1	2109.83	-0.488265	0.293193	-1.66534	0.0958454	1	DR1 (One) transcription factor family [Source:UniProtKB/TrEMBL;Acc:O45550]
WBGene00001093	drp-1	4033.82	0.53138	0.409823	1.29661	0.194766	1	Dynamin-Related Protein; Dynamin-related protein [Source:UniProtKB/TrEMBL;Acc:G5EDY8]
WBGene00001094	dars-1	11724.6	0.131752	0.168179	0.783399	0.433393	1	Aspartate--tRNA ligase, cytoplasmic [Source:UniProtKB/Swiss-Prot;Acc:Q03577]
WBGene00001095	dars-2	709.505	0.384921	0.219401	1.75442	0.0793589	1	Aspartyl(D) Amino-acyl tRNA Synthetase [Source:UniProtKB/TrEMBL;Acc:P90831]
WBGene00001096	dsc-1	11.2856	-0.317106	0.703123	-0.450997	0.651992	1	Homeobox protein dsc-1 [Source:UniProtKB/Swiss-Prot;Acc:Q93246]
WBGene00001099	dsc-4	1512.75	0.118784	0.327617	0.36257	0.716926	1	Defecation Suppressor of Clk-1; Microsomal triglyceride transfer protein [Source:UniProtKB/TrEMBL;Acc:G5ECG7]
WBGene00001101	dsh-1	1217.38	0.247999	0.251573	0.98579	0.324236	1	DiSHevelled related [Source:UniProtKB/TrEMBL;Acc:B1Q240]
WBGene00001102	dsh-2	3596.26	0.198277	0.213893	0.926992	0.353931	1	DiSHevelled related [Source:UniProtKB/TrEMBL;Acc:Q18239]
WBGene00001103	dsl-1	233.245	-0.136094	0.416215	-0.32698	0.743683	1	Delta-like protein [Source:UniProtKB/TrEMBL;Acc:O45201]
WBGene00001104	dsl-2	1583.42	-0.144586	0.413571	-0.349605	0.726635	1	Delta-like protein [Source:UniProtKB/TrEMBL;Acc:O45203]
WBGene00001105	dsl-3	847.174	-0.455847	0.597014	-0.763545	0.445139	1	Delta-like protein [Source:UniProtKB/TrEMBL;Acc:U4PBR7]
WBGene00001106	dsl-4	1.52514	-2.94794	1.85615	-1.5882	0.112241	1	Delta-like protein [Source:UniProtKB/TrEMBL;Acc:Q93519]
WBGene00001107	dsl-5	65.9937	-0.353168	0.432383	-0.816796	0.414045	1	Delta-like protein [Source:UniProtKB/TrEMBL;Acc:Q20971]
WBGene00001108	dsl-6	55.1988	-0.787101	0.742268	-1.0604	0.288962	1	Delta-like protein [Source:UniProtKB/TrEMBL;Acc:O45602]
WBGene00001109	dsl-7	25.8636	-0.764451	0.439653	-1.73876	0.0820768	1	Delta-like protein [Source:UniProtKB/TrEMBL;Acc:Q7YXD2]
WBGene00001110	duo-1	745.083	0.796881	0.432519	1.84242	0.0654141	1	Deubiquitylating with USP/UBP and OTU domains [Source:UniProtKB/TrEMBL;Acc:Q7JLI8]
WBGene00001111	duo-2	7.91379	0.579003	0.804562	0.71965	0.47174	1
WBGene00001112	duo-3	1793.59	0.451568	0.477563	0.945567	0.344369	1	Deubiquitylating with USP/UBP and OTU domains [Source:UniProtKB/TrEMBL;Acc:U4PBZ5]
WBGene00001113	dur-1	2550.79	-0.55134	0.539476	-1.02199	0.306785	1	Dauer Up-Regulated [Source:UniProtKB/TrEMBL;Acc:H9G2U2]
WBGene00001115	dyb-1	890.689	0.232297	0.195349	1.18914	0.234386	1	Dystrobrevin-1 [Source:UniProtKB/Swiss-Prot;Acc:Q9Y048]
WBGene00001116	dyc-1	180.744	0.0927488	0.355868	0.260627	0.79438	1	Dystrophin-like protein 1 [Source:UniProtKB/Swiss-Prot;Acc:Q8STF6]
WBGene00001117	dyf-1	72.3276	0.266784	0.337803	0.789762	0.429667	1	Tetratricopeptide repeat protein 30 homolog [Source:UniProtKB/Swiss-Prot;Acc:Q8I7G4]
WBGene00001118	dyf-2	112.197	0.398332	0.291988	1.36421	0.172503	1	WD repeat-containing protein dyf-2 [Source:UniProtKB/Swiss-Prot;Acc:G5ECZ4]
WBGene00001119	dyf-3	451.932	0.439297	0.381466	1.1516	0.249484	1	Clusterin-associated protein 1 homolog [Source:UniProtKB/Swiss-Prot;Acc:Q6I6D4]
WBGene00001121	dyf-5	29.0967	0.322593	0.462829	0.697001	0.485802	1	Serine/threonine-protein kinase dyf-5 [Source:UniProtKB/Swiss-Prot;Acc:B3WFY8]
WBGene00001122	dyf-6	72.2315	-0.0830324	0.296411	-0.280126	0.779381	1	Intraflagellar transport protein 46 homolog [Source:UniProtKB/Swiss-Prot;Acc:Q0G838]
WBGene00001127	dyf-11	90.0864	1.08015	0.538391	2.00626	0.0448288	1
WBGene00001129	dyf-13	20.4802	-0.0231041	0.464125	-0.0497799	0.960298	1	Intraflagellar transport protein 56 homolog [Source:UniProtKB/Swiss-Prot;Acc:Q95QT8]
WBGene00001130	dyn-1	2481.01	0.145253	0.23265	0.62434	0.532404	1	Dynamin [Source:UniProtKB/Swiss-Prot;Acc:P39055]
WBGene00001131	dys-1	1848.75	-0.258805	0.188743	-1.3712	0.170312	1	Dystrophin-1 [Source:UniProtKB/Swiss-Prot;Acc:Q9TW65]
WBGene00001132	alp-1	2909.84	-0.312144	0.421947	-0.739769	0.45944	1	ALP/Enigma encoding [Source:UniProtKB/TrEMBL;Acc:G5EC72]
WBGene00001133	eat-2	34.4799	-0.215841	0.543106	-0.397419	0.691058	1	Neuronal acetylcholine receptor subunit eat-2 [Source:UniProtKB/Swiss-Prot;Acc:Q9U298]
WBGene00001134	eat-3	2178.35	0.677845	0.364187	1.86125	0.0627082	1
WBGene00001135	eat-4	221.663	-0.462183	0.290212	-1.59257	0.111257	1	Probable vesicular glutamate transporter eat-4 [Source:UniProtKB/Swiss-Prot;Acc:P34644]
WBGene00001136	eat-5	31.4568	-0.497111	0.431108	-1.1531	0.24887	1	Innexin eat-5 [Source:UniProtKB/Swiss-Prot;Acc:Q27295]
WBGene00001137	eat-6	18994.6	0.0302234	0.257734	0.117266	0.906649	1	Sodium/potassium-transporting ATPase subunit alpha [Source:UniProtKB/TrEMBL;Acc:P90735]
WBGene00001145	eat-16	614.241	-0.135562	0.223442	-0.6067	0.54405	1
WBGene00001147	eat-18	4.02654	-1.48437	1.27394	-1.16518	0.243945	1
WBGene00001148	eat-20	1192.9	-0.0363735	0.163827	-0.222024	0.824295	1	Abnormal pharyngeal pumping eat-20 [Source:UniProtKB/Swiss-Prot;Acc:Q9NL29]
WBGene00001149	bcat-1	4139.92	0.201674	0.284718	0.70833	0.478741	1	Branched-chain-amino-acid aminotransferase, cytosolic [Source:UniProtKB/Swiss-Prot;Acc:P54688]
WBGene00001150	ech-1.1	186.288	0.19571	0.4102	0.477108	0.633285	1	Enoyl-CoA Hydratase [Source:UniProtKB/TrEMBL;Acc:O17612]
WBGene00001151	ech-2	1050.95	-0.175606	0.288359	-0.608982	0.542536	1	Enoyl-CoA Hydratase [Source:UniProtKB/TrEMBL;Acc:Q20184]
WBGene00001152	ech-3	379.69	0.332374	0.331146	1.00371	0.315519	1	Enoyl-CoA Hydratase [Source:UniProtKB/TrEMBL;Acc:A0A131MCK1]
WBGene00001153	ech-4	3825.51	0.115305	0.262342	0.439521	0.660284	1	Enoyl-CoA Hydratase [Source:UniProtKB/TrEMBL;Acc:Q09603]
WBGene00001154	ech-5	1487.71	-0.416279	0.238553	-1.74501	0.0809824	1	Enoyl-CoA Hydratase [Source:UniProtKB/TrEMBL;Acc:O45106]
WBGene00001155	ech-6	13530.8	-0.0140134	0.356568	-0.0393009	0.968651	1	Probable enoyl-CoA hydratase, mitochondrial [Source:UniProtKB/Swiss-Prot;Acc:P34559]
WBGene00001156	ech-7	4107.49	-0.202915	0.514909	-0.39408	0.693522	1	Enoyl-CoA Hydratase [Source:UniProtKB/TrEMBL;Acc:Q9NEZ8]
WBGene00001157	ech-8	281.031	0.211021	0.34243	0.616245	0.537733	1	Enoyl-CoA Hydratase [Source:UniProtKB/TrEMBL;Acc:O17761]
WBGene00001158	ech-9	114.021	0.0833305	0.587672	0.141798	0.88724	1	Enoyl-CoA Hydratase [Source:UniProtKB/TrEMBL;Acc:A0A061AKU6]
WBGene00001159	eff-1	397.411	-0.100927	0.311588	-0.323913	0.746004	1	EFF-1A; Epithelial Fusion Failure [Source:UniProtKB/TrEMBL;Acc:G5ECA1]
WBGene00001160	efk-1	3553.14	0.621088	0.398876	1.5571	0.119447	1	Eukaryotic elongation factor 2 kinase [Source:UniProtKB/Swiss-Prot;Acc:O01991]
WBGene00001161	efl-1	2632.19	0.0182895	0.344671	0.0530636	0.957681	1	E2F-like (Mammalian transcription factor); EFL-1 [Source:UniProtKB/TrEMBL;Acc:G5EF11]
WBGene00001162	efl-2	675.348	-0.0249569	0.286395	-0.0871415	0.930559	1	E2F-like (Mammalian transcription factor) [Source:UniProtKB/TrEMBL;Acc:A5HWA7]
WBGene00001163	efn-2	642.405	-0.629725	0.415647	-1.51505	0.129761	1	Eph(F)riN [Source:UniProtKB/TrEMBL;Acc:Q9U3M2]
WBGene00001164	efn-3	70.6365	0.306779	0.448511	0.683995	0.493979	1	Eph(F)riN [Source:UniProtKB/TrEMBL;Acc:Q19475]
WBGene00001165	efn-4	688.539	0.0822537	0.351325	0.234124	0.814889	1	Ephrin-4 [Source:UniProtKB/Swiss-Prot;Acc:O44516]
WBGene00001166	eftu-2	8296.46	0.346156	0.297434	1.16381	0.244502	1	Elongation Factor TU family [Source:UniProtKB/TrEMBL;Acc:Q23463]
WBGene00001167	eef-2	134996	0.129296	0.192115	0.673013	0.500939	1	Elongation factor 2 [Source:UniProtKB/Swiss-Prot;Acc:P29691]
WBGene00001168	eef-1A.1	315288	0.282167	0.229221	1.23098	0.218329	1	Elongation factor 1-alpha [Source:UniProtKB/Swiss-Prot;Acc:P53013]
WBGene00001169	eef-1A.2	48470.7	-0.0943557	0.234147	-0.402977	0.686965	1	Elongation factor 1-alpha [Source:UniProtKB/Swiss-Prot;Acc:P53013]
WBGene00001170	egl-1	239.876	-0.190868	0.426558	-0.447462	0.654541	1	Programmed cell death activator egl-1 [Source:UniProtKB/Swiss-Prot;Acc:O61667]
WBGene00001172	egl-3	3466.1	0.298613	0.334323	0.893188	0.371756	1	Neuroendocrine convertase 2 [Source:UniProtKB/Swiss-Prot;Acc:G5ECN9]
WBGene00001173	egl-4	9786.06	0.127658	0.263731	0.484045	0.628354	1	cGMP-dependent protein kinase egl-4 [Source:UniProtKB/Swiss-Prot;Acc:O76360]
WBGene00001174	egl-5	85.4973	-0.30258	0.310353	-0.974954	0.329583	1	Homeobox protein egl-5 [Source:UniProtKB/Swiss-Prot;Acc:P17486]
WBGene00001175	egl-6	174.257	0.0626435	0.342164	0.18308	0.854735	1	G protein-coupled receptor EGL-6 isoform b [Source:UniProtKB/TrEMBL;Acc:G5EFX1]
WBGene00001177	egl-8	1995.55	0.183615	0.272857	0.672934	0.500989	1	1-phosphatidylinositol 4,5-bisphosphate phosphodiesterase beta egl-8 [Source:UniProtKB/Swiss-Prot;Acc:G5EBH0]
WBGene00001178	egl-9	610.277	0.151453	0.347217	0.436192	0.662698	1	Hypoxia-inducible factor prolyl hydroxylase [Source:UniProtKB/Swiss-Prot;Acc:G5EBV0]
WBGene00001179	egl-10	328.783	-0.0177537	0.532796	-0.0333218	0.973418	1	Regulator of G-protein signaling egl-10 [Source:UniProtKB/Swiss-Prot;Acc:P49809]
WBGene00001182	egl-13	469.894	0.198279	0.277657	0.714115	0.475156	1	Transcription factor egl-13 [Source:UniProtKB/Swiss-Prot;Acc:Q23045]
WBGene00001184	egl-15	386.294	0.394345	0.352554	1.11854	0.263338	1	Myoblast growth factor receptor egl-15 [Source:UniProtKB/Swiss-Prot;Acc:Q10656]
WBGene00001185	egl-17	27.4921	-0.405591	0.459628	-0.882434	0.377542	1	EGL-17 [Source:UniProtKB/TrEMBL;Acc:G5EEF1]
WBGene00001186	egl-18	1353.13	-0.315306	0.243861	-1.29297	0.19602	1	GATA-like transcription factor ELT-5 [Source:UniProtKB/TrEMBL;Acc:G5EGF4]
WBGene00001187	egl-19	353.838	0.193129	0.346904	0.556721	0.577718	1	Voltage-dependent L-type calcium channel subunit alpha [Source:UniProtKB/TrEMBL;Acc:G5EG02]
WBGene00001188	egl-20	117.003	0.0879462	0.39724	0.221393	0.824787	1	Wnt homolog [Source:UniProtKB/TrEMBL;Acc:G5EG05]
WBGene00001189	egl-21	3273.26	-0.0612821	0.325073	-0.188518	0.85047	1	Carboxypeptidase E [Source:UniProtKB/Swiss-Prot;Acc:O17754]
WBGene00001190	egl-23	111.015	0.414252	0.273992	1.51191	0.130556	1
WBGene00001193	egl-26	512.836	-0.402277	0.212204	-1.89571	0.0579985	1
WBGene00001194	egl-27	4149.39	0.747918	0.418716	1.78622	0.0740643	1	Egg-laying defective protein 27 [Source:UniProtKB/Swiss-Prot;Acc:Q09228]
WBGene00001196	egl-30	4706.72	-0.14786	0.235135	-0.62883	0.529461	1	EGL-30; Heterotrimeric G protein alpha subunit [Source:UniProtKB/TrEMBL;Acc:G5EGU1]
WBGene00001202	egl-36	79.2964	0.0465731	0.34246	0.135996	0.891825	1	Potassium voltage-gated channel protein egl-36 [Source:UniProtKB/Swiss-Prot;Acc:G5EFC3]
WBGene00001204	egl-38	45.429	-0.493205	0.403508	-1.22229	0.221597	1	PAX protein [Source:UniProtKB/TrEMBL;Acc:G5ED14]
WBGene00001207	egl-43	143.597	-0.255889	0.376441	-0.679758	0.496658	1	Egl-43 [Source:UniProtKB/TrEMBL;Acc:Q26336]
WBGene00001208	egl-44	1080.14	0.273045	0.263117	1.03773	0.299393	1	Transcription enhancer factor-like protein egl-44 [Source:UniProtKB/Swiss-Prot;Acc:Q19849]
WBGene00001209	egl-45	8360.64	0.673664	0.29277	2.301	0.0213914	1	Eukaryotic translation initiation factor 3 subunit A [Source:UniProtKB/Swiss-Prot;Acc:P34339]
WBGene00001210	egl-46	78.5862	-0.607527	0.322596	-1.88324	0.0596676	1	C2H2 zinc finger protein EGL-46 [Source:UniProtKB/TrEMBL;Acc:G5EFY4]
WBGene00001211	egl-47	25.3673	-0.0268165	0.397349	-0.0674886	0.946193	1	Egg laying defective EGL-47A [Source:UniProtKB/TrEMBL;Acc:G5EDX4]
WBGene00001214	ego-1	1350.47	0.810386	0.371378	2.18211	0.0291017	1	Enhancer of Glp-One (Glp-1); RNA-directed RNA polymerase related EGO-1 [Source:UniProtKB/TrEMBL;Acc:G5EBQ3]
WBGene00001215	ego-2	1872.55	-0.0737753	0.224091	-0.32922	0.741989	1	Enhancer of Glp-One (Glp-1); Enhancer of glp-1 [Source:UniProtKB/TrEMBL;Acc:G5EBN5]
WBGene00001223	ehn-3	2.68524	-0.24661	1.39475	-0.176813	0.859655	1	Enhancer of HAND mutation hnd-1 [Source:UniProtKB/TrEMBL;Acc:H2L026]
WBGene00001224	ehs-1	1862.1	0.784242	0.38667	2.02819	0.0425405	1	EHS-1; Eps15 (Endocytosis protein) Homologous Sequence [Source:UniProtKB/TrEMBL;Acc:Q9BIF4]
WBGene00001225	eif-3.B	12173.6	0.236108	0.211755	1.11501	0.264848	1	Eukaryotic translation initiation factor 3 subunit B [Source:UniProtKB/Swiss-Prot;Acc:Q9XWI6]
WBGene00001226	eif-3.C	8794.35	0.251338	0.144772	1.7361	0.082547	1	Eukaryotic translation initiation factor 3 subunit C [Source:UniProtKB/Swiss-Prot;Acc:O02328]
WBGene00001227	eif-3.D	7710.63	0.269052	0.221787	1.21311	0.225088	1	Eukaryotic translation initiation factor 3 subunit D [Source:UniProtKB/Swiss-Prot;Acc:P30642]
WBGene00001228	eif-3.E	6049.11	0.0713383	0.190788	0.373915	0.708468	1	Eukaryotic translation initiation factor 3 subunit E [Source:UniProtKB/Swiss-Prot;Acc:O61820]
WBGene00001229	eif-3.F	7765.85	0.0158325	0.128189	0.123509	0.901704	1	Eukaryotic translation initiation factor 3 subunit F [Source:UniProtKB/Swiss-Prot;Acc:Q18967]
WBGene00001230	eif-3.G	6386.08	0.0866003	0.124377	0.696275	0.486256	1	Eukaryotic translation initiation factor 3 subunit G [Source:UniProtKB/Swiss-Prot;Acc:Q19706]
WBGene00001231	eif-3.H	4212.08	0.053406	0.240498	0.222064	0.824264	1	Eukaryotic translation initiation factor 3 subunit H [Source:UniProtKB/Swiss-Prot;Acc:O01974]
WBGene00001232	eif-3.I	11329	0.121829	0.235368	0.51761	0.60473	1	Eukaryotic translation initiation factor 3 subunit I [Source:UniProtKB/Swiss-Prot;Acc:Q965S8]
WBGene00001233	eif-3.K	4975.78	-0.157385	0.238618	-0.659567	0.509532	1	Eukaryotic translation initiation factor 3 subunit K [Source:UniProtKB/Swiss-Prot;Acc:Q9XUP3]
WBGene00001234	eif-6	9105.16	-0.292091	0.314585	-0.928496	0.35315	1	Eukaryotic translation initiation factor 6 [Source:UniProtKB/Swiss-Prot;Acc:O62106]
WBGene00001235	elb-1	2695.68	-0.192052	0.423327	-0.453672	0.650065	1	ELongin B; RNA polymerase II transcription factor SIII p18 subunit [Source:UniProtKB/TrEMBL;Acc:G5ECR7]
WBGene00001236	elc-1	648.569	-0.577924	0.492052	-1.17452	0.240187	1	ELongin C [Source:UniProtKB/TrEMBL;Acc:Q9BKS1]
WBGene00001237	elc-2	16.069	-0.744429	0.645778	-1.15276	0.249008	1	ELongin C [Source:UniProtKB/TrEMBL;Acc:Q23153]
WBGene00001239	elo-1	6982.32	-0.331503	0.176723	-1.87584	0.0606778	1	Elongation of very long chain fatty acids protein [Source:UniProtKB/TrEMBL;Acc:G5EEE5]
WBGene00001240	elo-2	3126.44	-0.648649	0.329561	-1.96822	0.0490424	1	Elongation of very long chain fatty acids protein [Source:UniProtKB/TrEMBL;Acc:Q9XVQ9]
WBGene00001241	elo-3	2636.19	0.095449	0.283725	0.336414	0.736558	1	Putative fatty acid elongation protein 3 [Source:UniProtKB/Swiss-Prot;Acc:P49191]
WBGene00001242	elo-4	251.559	-0.573741	0.530242	-1.08204	0.279237	1	Putative fatty acid elongation protein 4 [Source:UniProtKB/Swiss-Prot;Acc:Q03574]
WBGene00001243	elo-5	2554.35	-0.229126	0.192353	-1.19118	0.233583	1	Elongation of very long chain fatty acids protein 5 [Source:UniProtKB/Swiss-Prot;Acc:Q20300]
WBGene00001244	elo-6	6478.79	-0.306121	0.374357	-0.817725	0.413514	1	Elongation of very long chain fatty acids protein 6 [Source:UniProtKB/Swiss-Prot;Acc:Q20303]
WBGene00001245	elo-7	32.6417	-1.0902	1.02659	-1.06196	0.288253	1	Elongation of very long chain fatty acids protein [Source:UniProtKB/TrEMBL;Acc:Q20904]
WBGene00001246	elo-8	38.7177	0.0168168	0.875881	0.0191999	0.984682	1	Elongation of very long chain fatty acids protein [Source:UniProtKB/TrEMBL;Acc:F3Y5R4]
WBGene00001247	elo-9	280.963	-0.31806	0.274833	-1.15728	0.247156	1	Elongation of very long chain fatty acids protein [Source:UniProtKB/TrEMBL;Acc:Q9NAC6]
WBGene00001248	elp-1	288.287	0.150991	0.290291	0.520137	0.602968	1	Echinoderm microtubule-associated protein-like elp-1 [Source:UniProtKB/Swiss-Prot;Acc:O45487]
WBGene00001249	elt-1	734.619	0.167881	0.216978	0.773725	0.439094	1	Transcription factor elt-1 [Source:UniProtKB/Swiss-Prot;Acc:P28515]
WBGene00001250	elt-2	981.628	-0.265562	0.198843	-1.33553	0.181702	1	Transcription factor elt-2 [Source:UniProtKB/Swiss-Prot;Acc:Q10655]
WBGene00001251	elt-3	875.414	0.0884856	0.269858	0.327897	0.742989	1	Erythroid-Like Transcription factor family; GATA transcription factor ELT-3 [Source:UniProtKB/TrEMBL;Acc:G5ECF7]
WBGene00001252	elt-4	33.3357	-0.917266	0.42674	-2.14948	0.0315968	1	Erythroid-Like Transcription factor family [Source:UniProtKB/TrEMBL;Acc:Q8MQA7]
WBGene00001253	elt-6	277.43	-0.472934	0.2152	-2.19765	0.0279739	1	Erythroid-Like Transcription factor family; GATA-like transcription factor ELT-6 [Source:UniProtKB/TrEMBL;Acc:G5EGN3]
WBGene00001258	emb-4	3174.43	0.338305	0.443191	0.763339	0.445261	1
WBGene00001259	emb-5	7097.88	0.930317	0.422899	2.19986	0.0278169	1	Suppressor of Ty 6 homolog [Source:UniProtKB/Swiss-Prot;Acc:P34703]
WBGene00001262	emb-8	3241.01	0.385265	0.355594	1.08344	0.278612	1	NADPH--cytochrome P450 reductase [Source:UniProtKB/TrEMBL;Acc:Q09590]
WBGene00001263	emb-9	7254.37	0.309245	0.229366	1.34826	0.177576	1	Collagen alpha-1(IV) chain [Source:UniProtKB/Swiss-Prot;Acc:P17139]
WBGene00001281	emb-27	2106.73	0.179792	0.350932	0.512327	0.608422	1	Cell division cycle protein 16 homolog [Source:UniProtKB/Swiss-Prot;Acc:G5EG38]
WBGene00001284	emb-30	1512.89	0.889217	0.388005	2.29177	0.021919	1	Abnormal embryogenesis protein 30 [Source:UniProtKB/Swiss-Prot;Acc:P34441]
WBGene00001303	emo-1	9839.82	-0.824542	0.371458	-2.21975	0.0264359	1	Protein transport protein Sec61 subunit gamma [Source:UniProtKB/Swiss-Prot;Acc:Q19967]
WBGene00001309	emr-1	5454.1	-0.071301	0.347165	-0.205381	0.837274	1	Emerin homolog 1 [Source:UniProtKB/Swiss-Prot;Acc:O01971]
WBGene00001310	end-1	51.4821	-0.0308462	0.381633	-0.0808269	0.93558	1	ENDoderm determining; GATA transcription factor END-1 [Source:UniProtKB/TrEMBL;Acc:G5EDN4]
WBGene00001311	end-3	28.2379	-0.10985	0.453245	-0.242363	0.808499	1	ENDoderm determining [Source:UniProtKB/TrEMBL;Acc:Q9XUW7]
[truncated: 45,189 more rows]
