# Supplementary material for: The ribosomal RNA m5C methyltransferase NSUN-1 modulates healthspan and oogenesis in Caenorhabditis elegans
Source: eLife. 2020 Dec 8;9:e56205. doi: 10.7554/eLife.56205 (PMC7746234; doi:10.7554/eLife.56205)
Supplement: Source data 2. — xlsx-file containing RNA-seq analysis results for the comparison between total mRNAs and polysomal mRNAs for control RNAi (sheet 1) and nsun-1 RNAi (sheet 2). [file elife-56205-data2.xlsx]

## Sheet: RNAi control
wormbase_ID	gene_name	baseMean	log2FoldChange	lfcSE	stat	pvalue	padj	description
WBGene00014772	F56D5.4	944.475	-2.17143	0.222521	-9.75833	1.69926e-22	2.81075e-18
WBGene00014294	C53C7.5	1719.38	-2.8873	0.303948	-9.49932	2.11263e-21	1.74725e-17
WBGene00004179	prg-2	3231.52	-2.09107	0.226855	-9.21765	3.03694e-20	1.67447e-16	Piwi-like protein [Source:UniProtKB/TrEMBL;Acc:Q17567]
WBGene00012592	Y38E10A.14	111.182	-3.76696	0.45648	-8.25218	1.55527e-16	6.43145e-13
WBGene00018862	wago-2	1899.29	-1.98261	0.248823	-7.96794	1.61344e-15	5.33757e-12
WBGene00014820	R09B3.6	172.132	-1.82053	0.234627	-7.75924	8.5442e-15	2.35549e-11
WBGene00001091	drh-2	488.18	-3.86224	0.531352	-7.2687	3.62957e-13	7.50459e-10
WBGene00021050	W05H9.3	11283.6	-1.69744	0.233401	-7.27263	3.52564e-13	7.50459e-10
WBGene00020028	R12C12.8	323.537	-1.90801	0.289695	-6.58627	4.51014e-11	8.28914e-08
WBGene00021186	Y9D1A.1	132.307	-3.61732	0.557726	-6.48583	8.82432e-11	1.45963e-07
WBGene00010019	F54B8.4	861.803	1.07847	0.168918	6.38459	1.71859e-10	2.58429e-07
WBGene00015359	C02G6.1	42.8517	-2.80288	0.441035	-6.35524	2.08104e-10	2.86855e-07
WBGene00013730	sql-1	589.122	-1.95655	0.309566	-6.32029	2.61068e-10	3.32179e-07	Suppressor of gpa-3QL dye-filling defect [Source:UniProtKB/TrEMBL;Acc:D0Z5P0]
WBGene00017785	F25E5.4	158.05	-2.33064	0.372084	-6.26374	3.75853e-10	4.14466e-07
WBGene00045238	rpr-1	59.5127	-4.91133	0.783655	-6.26721	3.67566e-10	4.14466e-07
WBGene00010959	nduo-1	13951.5	-2.55581	0.409069	-6.24787	4.16088e-10	4.30157e-07	NADH-ubiquinone oxidoreductase chain 1 [Source:UniProtKB/Swiss-Prot;Acc:P24887]
WBGene00003827	ntl-4	2520.56	-1.15457	0.185582	-6.22134	4.92922e-10	4.79613e-07	NOT-Like (Yeast CCR4/NOT complex component) [Source:UniProtKB/TrEMBL;Acc:W6RTE4]
WBGene00012584	ceh-100	1829.84	-1.76002	0.2853	-6.169	6.87216e-10	6.31513e-07	C. Elegans Homeobox [Source:UniProtKB/TrEMBL;Acc:Q7K714]
WBGene00014505	T05E11.9	2356.88	-2.85499	0.469214	-6.08462	1.16768e-09	1.01656e-06
WBGene00017372	F10G7.9	1388.64	-2.09842	0.347556	-6.03764	1.56385e-09	1.29338e-06
WBGene00015640	C09E7.6	140.741	-2.60367	0.432913	-6.01429	1.80676e-09	1.42313e-06
WBGene00010960	atp-6	25509	-2.71434	0.453316	-5.98773	2.12793e-09	1.53035e-06	ATP synthase subunit a [Source:UniProtKB/Swiss-Prot;Acc:P24888]
WBGene00011599	T07G12.8	306.27	-1.99308	0.332803	-5.98876	2.11441e-09	1.53035e-06
WBGene00014836	T09F5.12	424.275	-1.6531	0.277003	-5.96781	2.4046e-09	1.65727e-06
WBGene00007906	C33G3.6	248.176	-1.60801	0.270843	-5.93705	2.90192e-09	1.92002e-06
WBGene00019278	K01A2.3	75.2026	-2.67343	0.453651	-5.89313	3.78946e-09	2.41082e-06
WBGene00001229	eif-3.F	7765.85	0.754911	0.128335	5.88236	4.04465e-09	2.47787e-06	Eukaryotic translation initiation factor 3 subunit F [Source:UniProtKB/Swiss-Prot;Acc:Q18967]
WBGene00004064	pms-2	823.267	-2.26082	0.387482	-5.83464	5.39072e-09	3.18457e-06	PMS (Post Meiotic Segregation) family [Source:UniProtKB/TrEMBL;Acc:G5EFG5]
WBGene00021205	Y17G9B.8	465.02	-1.1165	0.192874	-5.78875	7.09126e-09	4.04471e-06
WBGene00019079	rpa-4	75.8236	-2.29692	0.405079	-5.6703	1.42545e-08	7.85944e-06	Replication Protein A homolog [Source:UniProtKB/TrEMBL;Acc:Q8I7G2]
WBGene00219303	Y13C8A.4	89.2547	-2.71815	0.481839	-5.6412	1.68868e-08	9.01046e-06
WBGene00015818	C16A11.5	391.201	-2.25081	0.399483	-5.63432	1.75755e-08	9.08489e-06
WBGene00006941	wnk-1	3319.28	-1.40448	0.250218	-5.61301	1.98837e-08	9.96655e-06	Serine/threonine-protein kinase WNK [Source:UniProtKB/Swiss-Prot;Acc:X5M5N0]
WBGene00014643	B0391.8	174.389	-1.70305	0.305488	-5.57486	2.47728e-08	1.2052e-05
WBGene00013465	Y67H2A.10	1285.1	-2.12287	0.382795	-5.5457	2.92779e-08	1.38368e-05
WBGene00019913	R06B10.2	36.3551	-2.49517	0.452732	-5.51136	3.56069e-08	1.63604e-05	Protein-tyrosine-phosphatase [Source:UniProtKB/TrEMBL;Acc:O44874]
WBGene00017849	F27B3.7	60.1597	-1.87053	0.339924	-5.50278	3.7384e-08	1.67127e-05
WBGene00012196	bath-35	93.5982	-1.46556	0.267309	-5.48263	4.19044e-08	1.81002e-05	BTB and MATH domain containing [Source:UniProtKB/TrEMBL;Acc:Q9XUM9]
WBGene00206522	F14D2.19	81.1101	-4.22683	0.771403	-5.4794	4.26762e-08	1.81002e-05
WBGene00003784	nos-2	1440.68	-1.88869	0.345326	-5.46928	4.51868e-08	1.86859e-05	NanOS related [Source:UniProtKB/TrEMBL;Acc:Q23406]
WBGene00044149	T24D5.6	27.7325	-3.13787	0.576968	-5.43855	5.37166e-08	2.16714e-05
WBGene00008622	F09C8.2	1634.64	-1.47488	0.273975	-5.38327	7.3145e-08	2.88069e-05
WBGene00017077	D2096.10	127.54	-1.65928	0.308716	-5.37478	7.66747e-08	2.94948e-05
WBGene00011561	ttr-15	23657.7	1.04339	0.195566	5.33525	9.54142e-08	3.58351e-05	Transthyretin-like protein 15 [Source:UniProtKB/Swiss-Prot;Acc:Q22288]
WBGene00011696	eea-1	978.748	-2.36276	0.443183	-5.33134	9.74898e-08	3.58351e-05	EEA1; EEA1 (Early Endosome Antigen, Rab effector) homolog [Source:UniProtKB/TrEMBL;Acc:G5ED80]
WBGene00044493	Y54G2A.50	324.244	-1.91371	0.359757	-5.31945	1.0408e-07	3.74258e-05
WBGene00016330	C32E12.4	449.134	-1.94595	0.368152	-5.28573	1.25206e-07	4.40644e-05
WBGene00004879	smg-1	1558.06	-1.38122	0.262512	-5.26154	1.42851e-07	4.92269e-05	Serine/threonine-protein kinase smg-1 [Source:UniProtKB/Swiss-Prot;Acc:O01510]
WBGene00014987	ZK637.6	680.972	-1.4215	0.271013	-5.24513	1.56168e-07	5.27179e-05
WBGene00004898	snb-2	861.476	0.918543	0.17564	5.2297	1.69787e-07	5.6169e-05	SyNaptoBrevin related [Source:UniProtKB/TrEMBL;Acc:Q19767]
WBGene00011240	R11A8.7	3690.7	-1.62674	0.311474	-5.22271	1.76327e-07	5.71886e-05	Ankyrin repeat and KH domain-containing protein R11A8.7 [Source:UniProtKB/Swiss-Prot;Acc:Q21920]
WBGene00010113	F55D12.5	1336.66	-2.13168	0.409007	-5.21183	1.86987e-07	5.948e-05
WBGene00001394	fat-2	13723.6	-1.38228	0.266495	-5.18688	2.13846e-07	6.67401e-05	Delta(12) fatty acid desaturase fat-2 [Source:UniProtKB/Swiss-Prot;Acc:G5EGA5]
WBGene00014309	F07H5.5	13318.8	-1.74658	0.338139	-5.16528	2.40084e-07	7.35414e-05
WBGene00015356	tag-278	296.308	-2.13685	0.417623	-5.1167	3.10925e-07	9.35094e-05	Putative protein tag-278 [Source:UniProtKB/Swiss-Prot;Acc:Q11102]
WBGene00219758	linc-11	128.501	-1.68122	0.329528	-5.10192	3.36216e-07	9.93098e-05	NA
WBGene00014218	ZK1098.1	2268.01	-2.6692	0.524205	-5.0919	3.54494e-07	0.000101338	WW domain-containing protein ZK1098.1 [Source:UniProtKB/Swiss-Prot;Acc:P34600]
WBGene00019134	F59H6.3	62.099	-1.82356	0.358162	-5.09145	3.55337e-07	0.000101338
WBGene00016101	C25E10.12	675.276	0.744803	0.147035	5.06547	4.07395e-07	0.000114216	UPF0046 protein C25E10.12 [Source:UniProtKB/Swiss-Prot;Acc:Q18161]
WBGene00017304	F09F7.7	1815.05	-1.11149	0.221091	-5.02731	4.97401e-07	0.000137125	DNA N6-methyl adenine demethylase [Source:UniProtKB/Swiss-Prot;Acc:Q8MNT9]
WBGene00016258	vha-16	10380.7	0.536414	0.106828	5.0213	5.13217e-07	0.000139166	Vacuolar H ATPase [Source:UniProtKB/TrEMBL;Acc:Q95YD5]
WBGene00021763	Y51F10.2	6969.05	-1.55301	0.311047	-4.99286	5.94932e-07	0.000158722
WBGene00010369	chd-1	1118.14	-2.07424	0.415814	-4.98839	6.08854e-07	0.000158917	Chromodomain and Helicase Domain protein [Source:UniProtKB/TrEMBL;Acc:O17909]
WBGene00011335	T01E8.8	474.553	0.996635	0.199874	4.98631	6.15424e-07	0.000158917
WBGene00045366	Y17D7C.3	161.423	-1.25013	0.251003	-4.98053	6.34092e-07	0.000158917
WBGene00206355	C34C6.10	22.3866	-2.39596	0.480784	-4.98345	6.24616e-07	0.000158917
WBGene00219279	T24D5.11	17.5691	-3.8446	0.775104	-4.96011	7.04539e-07	0.000173937
WBGene00017754	F23F12.8	22.5542	-2.27683	0.460121	-4.94834	7.48484e-07	0.000182069
WBGene00016868	C52B9.8	1377.53	-2.05549	0.415823	-4.94318	7.68579e-07	0.000184247
WBGene00013193	Y54E2A.8	1050.62	-1.39096	0.281801	-4.93596	7.97576e-07	0.000188467
WBGene00001571	gei-14	926.445	-2.38171	0.483728	-4.92367	8.49377e-07	0.000197881	GEX Interacting protein [Source:UniProtKB/TrEMBL;Acc:Q21088]
WBGene00021605	Y46H3C.5	197.564	-3.08413	0.626792	-4.9205	8.63251e-07	0.00019832
WBGene00219838	C28H8.14	195.434	-1.78689	0.364324	-4.90466	9.35891e-07	0.000212063	NA
WBGene00020075	math-35	95.4082	-1.68419	0.344048	-4.89522	9.81934e-07	0.000218751
WBGene00194934	ZK809.9	49.0922	-1.74219	0.35604	-4.89325	9.9186e-07	0.000218751
WBGene00206362	B0041.11	276.201	-1.79525	0.367141	-4.88981	1.00935e-06	0.000219679
WBGene00017642	F20D12.2	1505.45	-2.36647	0.48431	-4.88626	1.02768e-06	0.000220765
WBGene00009582	F40F9.5	754.566	0.772153	0.158293	4.878	1.07166e-06	0.00022726
WBGene00004111	pqn-21	597.738	-1.38684	0.285625	-4.85548	1.20097e-06	0.000248315	Prion-like-(Q/N-rich)-domain-bearing protein; Putative MAP-like protein [Source:UniProtKB/TrEMBL;Acc:G5EF29]
WBGene00009511	F37H8.2	100.549	-2.28036	0.469497	-4.85703	1.19157e-06	0.000248315
WBGene00016494	C37A2.8	2390.74	-1.4551	0.300742	-4.83836	1.30912e-06	0.000265264
WBGene00017717	F22F4.4	409.247	-2.03442	0.420555	-4.83747	1.31501e-06	0.000265264
WBGene00011898	T21C9.13	2202.79	-1.6645	0.345204	-4.82179	1.42275e-06	0.000283538
WBGene00013141	Y53C12A.6	74.1475	-1.4155	0.294005	-4.81453	1.47547e-06	0.000287521
WBGene00043068	F32E10.9	300.232	-1.42855	0.296733	-4.81426	1.4775e-06	0.000287521
WBGene00017397	F12A10.8	456.689	-2.4038	0.499601	-4.81144	1.49844e-06	0.000288205
WBGene00015868	C16H3.3	422.09	-1.24379	0.258689	-4.80805	1.5241e-06	0.000289771
WBGene00022515	ttr-48	4347.89	1.01348	0.211004	4.80312	1.56212e-06	0.000293626	TransThyretin-Related family domain [Source:UniProtKB/TrEMBL;Acc:Q23378]
WBGene00001081	dpy-22	1444.29	-1.61716	0.337586	-4.79036	1.66481e-06	0.000302922	Mediator of RNA polymerase II transcription subunit 12 [Source:UniProtKB/Swiss-Prot;Acc:Q20497]
WBGene00006666	twk-11	48.075	-1.90554	0.397781	-4.79042	1.66435e-06	0.000302922	TWiK family of potassium channels [Source:UniProtKB/TrEMBL;Acc:H2KZ66]
WBGene00019712	rmh-1	496.855	-1.78603	0.372854	-4.79016	1.66652e-06	0.000302922	RMi1 (RMI1) Homolog [Source:UniProtKB/TrEMBL;Acc:P91399]
WBGene00004186	prpf-4	4246.26	-1.66961	0.349111	-4.78245	1.73169e-06	0.000310741	Vertebrate Pre-mRNA Processing Factor [Source:UniProtKB/TrEMBL;Acc:E3W737]
WBGene00014472	MTCE.33	1674.31	-2.42828	0.507938	-4.78067	1.74711e-06	0.000310741
WBGene00044412	F40H6.6	73.7279	-1.62657	0.340566	-4.77609	1.78737e-06	0.00031452
WBGene00006650	tts-1	11282	-3.07297	0.643875	-4.77263	1.81839e-06	0.00031661
WBGene00007899	C33D9.5	151.007	-2.18345	0.459069	-4.75626	1.97215e-06	0.000339806
WBGene00008684	mig-32	2052.99	-2.02898	0.426892	-4.75292	2.00503e-06	0.000341908
WBGene00014941	Y67H2A.9	188.566	-1.77475	0.373976	-4.74563	2.07855e-06	0.00035083
WBGene00043056	nfya-2	632.878	-1.43593	0.303165	-4.73646	2.17487e-06	0.000363379	Nuclear transcription Factor Y, A (Alpha) subunit [Source:UniProtKB/TrEMBL;Acc:F3Y5S3]
WBGene00185002	K11H3.8	324.434	-2.62636	0.555027	-4.73196	2.22363e-06	0.000367811
WBGene00005000	spp-15	1036.18	1.18147	0.250036	4.72518	2.29909e-06	0.000376527	SaPosin-like Protein family [Source:UniProtKB/TrEMBL;Acc:Q9BIC4]
WBGene00194641	F47G3.4	371.416	0.961395	0.203864	4.71586	2.40693e-06	0.000390324
WBGene00008145	set-5	618.122	-1.70673	0.363034	-4.7013	2.58508e-06	0.000411152	SET (Trithorax/polycomb) domain containing [Source:UniProtKB/TrEMBL;Acc:K8ESG9]
WBGene00009587	mig-38	1767.64	-1.54186	0.327944	-4.7016	2.58133e-06	0.000411152	Abnormal cell migration protein 38 [Source:UniProtKB/Swiss-Prot;Acc:A6ZJ71]
WBGene00045410	E01G4.7	124.782	-1.41075	0.300417	-4.69598	2.65338e-06	0.000417996
WBGene00009702	F44F4.3	55.8563	-1.58871	0.339245	-4.68307	2.82612e-06	0.000441008
WBGene00077593	C49G7.12	945.37	-1.37929	0.294749	-4.67956	2.8749e-06	0.000444428
WBGene00018452	F45D11.5	85.2289	-1.96342	0.420844	-4.66543	3.07978e-06	0.000471691
WBGene00011142	R08D7.1	1899.95	-1.65923	0.355965	-4.66121	3.14358e-06	0.000477045	BUD13 homolog [Source:UniProtKB/Swiss-Prot;Acc:P30640]
WBGene00019991	R09H3.3	65.2943	-2.88401	0.619282	-4.65702	3.2082e-06	0.000482427
WBGene00004296	rad-50	1820.25	-2.01051	0.432369	-4.64998	3.31969e-06	0.000494694	DNA repair protein rad-50 [Source:UniProtKB/Swiss-Prot;Acc:O44199]
WBGene00004101	hgrs-1	1902.8	-2.13615	0.459659	-4.64724	3.36411e-06	0.000496836	Hepatocyte Growth factor-Regulated TK Substrate (HRS) family [Source:UniProtKB/TrEMBL;Acc:Q17796]
WBGene00022765	ZK546.14	2704.6	-2.53229	0.546383	-4.63464	3.57566e-06	0.000523408
WBGene00011503	gcc-2	1554.34	-1.91335	0.414942	-4.61112	4.00501e-06	0.000577536	GRIP and coiled-coil domain-containing protein 2 [Source:UniProtKB/Swiss-Prot;Acc:P34562]
WBGene00013295	Y57G11B.2	437.669	1.00612	0.218305	4.60879	4.05019e-06	0.000577536
WBGene00045507	F10A3.17	1940.56	0.808483	0.17539	4.60964	4.03368e-06	0.000577536
WBGene00012245	W04D2.6	2343.63	-1.78012	0.38678	-4.60241	4.17639e-06	0.000585438
WBGene00013246	Y57A10A.1	293.953	-1.66624	0.361952	-4.60349	4.15469e-06	0.000585438
WBGene00001325	eor-2	708.151	-1.56065	0.340494	-4.58349	4.57279e-06	0.000635618	EOR-2B [Source:UniProtKB/TrEMBL;Acc:G5EGD8]
WBGene00016559	C41A3.2	121.243	-1.82431	0.398395	-4.57915	4.66867e-06	0.000643537
WBGene00008976	plp-2	17.1975	-2.6078	0.571145	-4.56593	4.9729e-06	0.000679807	Pur alpha Like Protein [Source:UniProtKB/TrEMBL;Acc:Q93537]
WBGene00016816	C50E3.5	899.074	-1.88392	0.412925	-4.56239	5.05747e-06	0.000685702
WBGene00022951	C30E1.9	1355.82	-1.31712	0.288989	-4.55768	5.17207e-06	0.000695539
WBGene00011415	him-18	946.273	-2.4104	0.529305	-4.5539	5.2661e-06	0.000702473	High Incidence of Males (Increased X chromosome loss) [Source:UniProtKB/TrEMBL;Acc:Q22145]
WBGene00004145	pqn-62	166.132	-1.29709	0.285572	-4.54208	5.57018e-06	0.000737091	Prion-like-(Q/N-rich)-domain-bearing protein [Source:UniProtKB/TrEMBL;Acc:A0A0K3ATD0]
WBGene00000592	coh-3	1112.71	-1.40225	0.309079	-4.53687	5.70944e-06	0.000749523	COHesin family [Source:UniProtKB/TrEMBL;Acc:Q19232]
WBGene00018898	F55F10.1	2627.88	-1.20297	0.265314	-4.53411	5.78457e-06	0.000753406	Midasin [Source:UniProtKB/TrEMBL;Acc:O61851]
WBGene00219912	F22H10.10	58.0011	-2.63462	0.582853	-4.52021	6.17772e-06	0.000798326	NA
WBGene00000298	cat-4	1381.54	0.897179	0.198647	4.51644	6.2887e-06	0.000806367	GTP cyclohydrolase 1 [Source:UniProtKB/Swiss-Prot;Acc:Q19980]
WBGene00014454	MTCE.7	1940.24	-2.42057	0.536434	-4.51234	6.41168e-06	0.000815813
WBGene00012660	Y39A1A.24	888.149	-1.02385	0.227025	-4.50987	6.48667e-06	0.000819053
WBGene00011299	ikke-1	1881.23	-2.05597	0.456291	-4.50583	6.61155e-06	0.000828497	Inhibitor of nuclear factor kappa-B kinase epsilon subunit homolog 1 [Source:UniProtKB/Swiss-Prot;Acc:P32742]
WBGene00220165	Y47G6A.36	78.4075	1.53778	0.341916	4.49756	6.87386e-06	0.000854891
WBGene00018051	che-10	328.133	-1.52235	0.338896	-4.49209	7.05285e-06	0.000870606	Rootletin [Source:UniProtKB/Swiss-Prot;Acc:Q09EF7]
WBGene00002295	let-19	1447.69	-1.55502	0.346462	-4.48829	7.17967e-06	0.000873227	Mediator of RNA polymerase II transcription subunit 13 [Source:UniProtKB/Swiss-Prot;Acc:Q93442]
WBGene00022474	zig-9	1131.07	0.816039	0.181808	4.48846	7.17404e-06	0.000873227	2 (Zwei) IG domain protein [Source:UniProtKB/TrEMBL;Acc:Q95Y79]
WBGene00012650	orc-1	3329.62	-1.49991	0.334976	-4.47767	7.5461e-06	0.000911095	ORC (Origin Recognition Complex) subunit [Source:UniProtKB/TrEMBL;Acc:Q9XX17]
WBGene00010507	K02E2.6	155.671	-1.34199	0.300248	-4.46962	7.83592e-06	0.000930014
WBGene00010961	nduo-2	3824.45	-2.57576	0.576024	-4.47161	7.76317e-06	0.000930014	NADH-ubiquinone oxidoreductase chain 2 [Source:UniProtKB/Swiss-Prot;Acc:P24889]
WBGene00022706	ZK354.3	31.9822	-3.48577	0.78005	-4.46865	7.87147e-06	0.000930014
WBGene00010044	F54C9.9	1519.19	-2.19954	0.492583	-4.46531	7.99518e-06	0.000937931
WBGene00001044	dnj-26	382.018	-1.74204	0.390397	-4.46222	8.11138e-06	0.000942007	DNaJ domain (Prokaryotic heat shock protein) [Source:UniProtKB/TrEMBL;Acc:Q9U2L4]
WBGene00011109	R07E5.1	1067.4	-2.1343	0.478396	-4.46137	8.14382e-06	0.000942007	G patch domain-containing protein 1 homolog [Source:UniProtKB/Swiss-Prot;Acc:Q21827]
WBGene00015608	math-3	200.166	-2.17541	0.488883	-4.44976	8.59669e-06	0.000983866	MATH (Meprin-associated Traf homology) domain containing [Source:UniProtKB/TrEMBL;Acc:Q8MXJ3]
WBGene00016496	C37C3.2	12583.5	0.69548	0.156321	4.44906	8.62466e-06	0.000983866	Eukaryotic translation initiation factor 5 [Source:UniProtKB/Swiss-Prot;Acc:Q22918]
WBGene00021265	Y22D7AR.12	31.702	-2.90444	0.653385	-4.44523	8.77993e-06	0.000994718
WBGene00004106	pqn-15	67.155	-2.17979	0.491239	-4.43734	9.10781e-06	0.00102485	Prion-like-(Q/N-rich)-domain-bearing protein [Source:UniProtKB/TrEMBL;Acc:P91094]
WBGene00009477	rbpl-1	6002.45	-1.84347	0.416252	-4.42873	9.47917e-06	0.00105871	Retinoblastoma Binding Protein Like [Source:UniProtKB/TrEMBL;Acc:O62235]
WBGene00020935	fnci-1	1280.65	-1.28275	0.28973	-4.42742	9.53675e-06	0.00105871	FANCI (Fanconi anemia complex component I) homolog [Source:UniProtKB/TrEMBL;Acc:Q7Z150]
WBGene00004148	pqn-65	2448.19	-1.28197	0.290049	-4.41986	9.87643e-06	0.00108911	Prion-like-(Q/N-rich)-domain-bearing protein [Source:UniProtKB/TrEMBL;Acc:H2KYH2]
WBGene00219849	C36C9.10	15.4766	-6.41712	1.4539	-4.41373	1.01604e-05	0.00111301	NA
WBGene00011975	T24B1.1	1086.21	-1.65948	0.376244	-4.41066	1.03057e-05	0.00112149	Golgin-84 [Source:UniProtKB/Swiss-Prot;Acc:P90970]
WBGene00009190	F27D4.6	210.565	-1.58335	0.35958	-4.40333	1.06601e-05	0.00113031
WBGene00015621	C09B7.2	522.261	0.721497	0.16384	4.40367	1.06437e-05	0.00113031
WBGene00018608	F48E3.9	29.5171	-2.10949	0.478809	-4.40571	1.0544e-05	0.00113031
WBGene00023159	W06H8.5	3939.18	-1.04476	0.237261	-4.40343	1.06554e-05	0.00113031
WBGene00015908	C17F3.3	14.7102	-6.83044	1.55248	-4.39971	1.08397e-05	0.00114203
WBGene00010520	cpx-2	70.6864	1.24368	0.282836	4.39718	1.09668e-05	0.00114811	ComPleXin (Synaptic protein) homolog [Source:UniProtKB/TrEMBL;Acc:Q21168]
WBGene00012121	T28C6.7	1071.84	-1.43901	0.327645	-4.39198	1.12322e-05	0.00116851
WBGene00012819	Y43F8B.9	100.275	-2.08668	0.475509	-4.3883	1.14239e-05	0.00117672
WBGene00016836	C50F2.2	1437.56	-1.83461	0.418123	-4.38774	1.14535e-05	0.00117672
WBGene00007091	eri-12	1666.62	-1.57884	0.360645	-4.37784	1.19862e-05	0.00122385	Enhanced RNAI (RNA interference) [Source:UniProtKB/TrEMBL;Acc:Q17415]
WBGene00010629	K07C5.6	3812.02	-2.32512	0.531797	-4.3722	1.23001e-05	0.00124363	Pre-mRNA-splicing factor SLU7 [Source:UniProtKB/Swiss-Prot;Acc:Q21278]
WBGene00011966	T23G7.3	3877.16	-1.95624	0.447481	-4.37166	1.23303e-05	0.00124363
WBGene00009067	F23A7.1	123.781	1.39075	0.319665	4.35065	1.35737e-05	0.00132208
WBGene00016097	C25E10.8	1016.73	0.848699	0.195021	4.35183	1.35006e-05	0.00132208
WBGene00017796	F25G6.1	143.911	-1.51812	0.348466	-4.35657	1.32116e-05	0.00132208
WBGene00018101	math-27	193.508	-1.50469	0.345482	-4.35534	1.3286e-05	0.00132208	MATH (Meprin-associated Traf homology) domain containing [Source:UniProtKB/TrEMBL;Acc:Q8MPV2]
WBGene00018892	cir-1	3864.46	-1.90512	0.437881	-4.35077	1.35657e-05	0.00132208	CIR (Transcription factor CBF1 Interacting coRepressor) homolog; CIR-1 [Source:UniProtKB/TrEMBL;Acc:G5EBE3]
WBGene00019124	F59E12.9	3687.64	-1.21462	0.279197	-4.35042	1.35876e-05	0.00132208
WBGene00014746	F27D4.3	81.6893	-1.38108	0.317686	-4.3473	1.37821e-05	0.00133316
WBGene00004995	spp-10	11054.9	0.780908	0.179865	4.34163	1.41431e-05	0.00134943	SaPosin-like Protein family [Source:UniProtKB/TrEMBL;Acc:Q18276]
WBGene00018204	F39F10.4	45.0416	-1.68587	0.388197	-4.34283	1.40661e-05	0.00134943
WBGene00022812	uvs-1	731.928	-2.20382	0.507695	-4.34082	1.41951e-05	0.00134943	UV-stimulated scaffold protein A homolog [Source:UniProtKB/Swiss-Prot;Acc:Q23088]
WBGene00010102	F55C9.5	23.2007	-2.5263	0.582254	-4.33883	1.4324e-05	0.00135391
WBGene00009412	F35E2.5	75.6967	-1.66692	0.386277	-4.31536	1.59345e-05	0.00149757
WBGene00005602	srj-14	89.2443	-1.46774	0.340473	-4.3109	1.62594e-05	0.00151947	Serpentine Receptor, class J [Source:UniProtKB/TrEMBL;Acc:O01456]
WBGene00044638	F23A7.8	782.88	-2.70309	0.627591	-4.30709	1.65418e-05	0.00153718
WBGene00020218	T04G9.7	5899.96	1.08662	0.252367	4.30573	1.66438e-05	0.00153802
WBGene00009393	clec-62	4931.28	1.00737	0.234182	4.30163	1.69544e-05	0.00155802	C-type LECtin [Source:UniProtKB/TrEMBL;Acc:O45441]
WBGene00001563	gei-6	2067.02	-1.38832	0.323358	-4.29344	1.75922e-05	0.00160157	GEX Interacting protein [Source:UniProtKB/TrEMBL;Acc:O16310]
WBGene00020097	larp-1	6475.28	-1.3593	0.316626	-4.29307	1.7622e-05	0.00160157	La-related protein 1 [Source:UniProtKB/Swiss-Prot;Acc:D5MCN2]
WBGene00016080	C24H12.11	303.904	-2.18939	0.511548	-4.27994	1.86947e-05	0.00168977
WBGene00010555	K04C1.5	902.019	-1.73723	0.406436	-4.27429	1.9175e-05	0.00172377
WBGene00219218	Y73B6BL.288	59.1186	-1.98357	0.464752	-4.26802	1.97215e-05	0.00176331
WBGene00001915	his-41	2393.63	0.746397	0.174996	4.26522	1.99708e-05	0.00177601	Probable histone H2B 3 [Source:UniProtKB/Swiss-Prot;Acc:Q27484]
WBGene00235352	ZK250.13	44.3847	-1.63612	0.383854	-4.26234	2.02294e-05	0.00178938
WBGene00009386	tag-290	205.968	1.11861	0.262597	4.25981	2.04596e-05	0.0017906
WBGene00017446	F14B8.4	167.617	1.24117	0.291345	4.26013	2.04311e-05	0.0017906
WBGene00022044	dpm-1	1898.72	0.669953	0.157427	4.25565	2.0844e-05	0.00181464	Dolichol Phosphate Mannosyltransferase [Source:UniProtKB/TrEMBL;Acc:U4PF58]
WBGene00011681	T10B10.4	1041.57	0.740185	0.17417	4.24979	2.13975e-05	0.00185307
WBGene00003587	ned-8	4422.52	0.877414	0.20663	4.24631	2.17322e-05	0.00185919	NEDD8 [Source:UniProtKB/Swiss-Prot;Acc:Q93725]
WBGene00019102	F59C12.3	1001.5	-1.49801	0.352839	-4.24561	2.18003e-05	0.00185919
WBGene00023519	Y60A3A.24	41.1593	-2.02745	0.477548	-4.24555	2.18054e-05	0.00185919
WBGene00004323	rde-1	1252.22	-1.68034	0.396522	-4.2377	2.2582e-05	0.00191553	RNA interference promoting factor RDE-1 [Source:UniProtKB/TrEMBL;Acc:G5EEH0]
WBGene00009234	F28H6.6	361.238	-1.03644	0.244691	-4.23572	2.27825e-05	0.00192268
WBGene00007327	C05C9.3	43.7906	-2.18322	0.516099	-4.23023	2.33454e-05	0.00195028
WBGene00019429	K06A5.1	1223	-1.80518	0.426642	-4.23114	2.32514e-05	0.00195028
WBGene00003053	lmp-1	11871.9	0.657496	0.155535	4.22733	2.36486e-05	0.0019637	LAMP family protein lmp-1 [Source:UniProtKB/Swiss-Prot;Acc:Q11117]
WBGene00017855	F27C1.6	1883.61	-1.34894	0.319254	-4.2253	2.38621e-05	0.0019637
WBGene00019303	K02D10.3	30.2222	-1.66497	0.393966	-4.22618	2.37695e-05	0.0019637
WBGene00008537	F02H6.4	775.274	-2.50013	0.591917	-4.22378	2.40241e-05	0.00196724
WBGene00002163	ist-1	219.333	-1.53763	0.364676	-4.21643	2.48196e-05	0.00201246	Insulin receptor SubsTrate homolog [Source:UniProtKB/TrEMBL;Acc:Q18820]
WBGene00009883	F49C12.14	551.819	0.921418	0.218501	4.217	2.47573e-05	0.00201246
WBGene00010056	smc-6	4194.07	-1.66871	0.396063	-4.21325	2.51719e-05	0.00203106	Structural maintenance of chromosomes protein 6 homolog smc-6 [Source:UniProtKB/Swiss-Prot;Acc:G5EG17]
WBGene00002086	ins-3	80.1499	1.03846	0.24674	4.20872	2.56824e-05	0.00206219	Probable insulin-like peptide beta-type 3 [Source:UniProtKB/Swiss-Prot;Acc:Q09628]
WBGene00017128	E04F6.9	2720.15	0.985185	0.2348	4.19585	2.71851e-05	0.00216384
WBGene00022328	Y82E9BL.12	28.0962	-2.20419	0.525353	-4.19564	2.72099e-05	0.00216384
WBGene00008934	F18C12.3	820.86	-1.86999	0.446994	-4.18348	2.87085e-05	0.00227209
WBGene00012424	dlc-3	134.299	1.27168	0.304803	4.17212	3.01778e-05	0.00237701	Dynein Light Chain [Source:UniProtKB/TrEMBL;Acc:Q8MPS5]
WBGene00015641	C09E7.7	156.044	-1.61601	0.387644	-4.16879	3.06227e-05	0.00240061
WBGene00003660	nhr-70	774.149	0.895569	0.214923	4.16692	3.08743e-05	0.00240892	Nuclear Hormone Receptor family [Source:UniProtKB/TrEMBL;Acc:G5EEL3]
WBGene00020735	T23F2.2	215.42	-1.57124	0.377635	-4.16073	3.1723e-05	0.00246352
WBGene00007458	ule-4	27125.7	1.2173	0.292723	4.15855	3.2028e-05	0.002466	UPF0375 protein ule-4 [Source:UniProtKB/Swiss-Prot;Acc:O62053]
WBGene00011045	gpx-2	2213.66	1.0067	0.242091	4.15837	3.20531e-05	0.002466	Glutathione peroxidase 2 [Source:UniProtKB/Swiss-Prot;Acc:O62327]
WBGene00000935	daz-1	5128.32	-1.78736	0.430343	-4.15335	3.27646e-05	0.00248605	DAZ protein 1 [Source:UniProtKB/Swiss-Prot;Acc:Q20870]
WBGene00011016	R04F11.3	2252.23	-2.20178	0.530046	-4.15393	3.26806e-05	0.00248605
WBGene00018761	F53E10.5	74.9784	-1.83821	0.442509	-4.15406	3.26627e-05	0.00248605
WBGene00006349	sur-2	898.193	-1.84387	0.445178	-4.14186	3.44495e-05	0.00260196	Mediator of RNA polymerase II transcription subunit 23 [Source:UniProtKB/Swiss-Prot;Acc:Q10669]
WBGene00009671	mfap-1	3818.56	-1.99006	0.480626	-4.14056	3.46452e-05	0.00260485	Microfibrillar-associated protein 1 [Source:UniProtKB/Swiss-Prot;Acc:Q93712]
WBGene00010967	nduo-5	9858.48	-1.48158	0.358633	-4.1312	3.60882e-05	0.00269332	NADH-ubiquinone oxidoreductase chain 5 [Source:UniProtKB/Swiss-Prot;Acc:P24896]
WBGene00195093	Y59E9AL.36	1510.04	-1.53857	0.37246	-4.13082	3.61476e-05	0.00269332
WBGene00000257	bmk-1	3421.68	-1.66098	0.403509	-4.11634	3.84936e-05	0.00275527	Kinesin-like protein [Source:UniProtKB/TrEMBL;Acc:G5EGL7]
WBGene00006618	trt-1	989.995	-2.0941	0.508327	-4.1196	3.79525e-05	0.00275527	Telomerase Reverse Transcriptase [Source:UniProtKB/TrEMBL;Acc:O45321]
WBGene00007348	C05G5.2	511.404	-1.39277	0.337887	-4.12201	3.75586e-05	0.00275527
WBGene00010638	K07F5.14	1178.68	-1.74779	0.424569	-4.11661	3.84483e-05	0.00275527
WBGene00011720	T11G6.5	1562.66	-1.60291	0.389299	-4.11743	3.83127e-05	0.00275527
WBGene00013659	Y105C5B.20	190.918	-1.30356	0.316518	-4.11843	3.81462e-05	0.00275527
WBGene00016490	C36E6.2	857.87	0.594794	0.144528	4.11544	3.86448e-05	0.00275527
WBGene00017235	F08B4.3	213.177	-1.20387	0.292364	-4.11771	3.82648e-05	0.00275527
WBGene00020087	R119.1	315.706	-1.5322	0.371546	-4.12384	3.72609e-05	0.00275527
WBGene00044200	H37A05.4	351.532	-1.9367	0.470087	-4.11988	3.79069e-05	0.00275527	LOW QUALITY PROTEIN: Uncharacterized protein CELE_H37A05.4 [Source:RefSeq peptide;Acc:NP_001294676]
WBGene00008234	C50F4.9	200.303	1.01977	0.248167	4.10919	3.97053e-05	0.00281167
WBGene00015813	thoc-2	2775.65	-1.99066	0.484513	-4.10857	3.98109e-05	0.00281167	THO Complex (Transcription factor/nuclear export) subunit [Source:UniProtKB/TrEMBL;Acc:Q18033]
WBGene00021643	ccep-290	22.4857	-2.5117	0.611447	-4.10779	3.99457e-05	0.00281167	CEntrosomal Protein [Source:UniProtKB/TrEMBL;Acc:A2A266]
WBGene00019796	M151.4	29.8181	-2.07764	0.506013	-4.1059	4.02737e-05	0.00282274
WBGene00015716	sox-4	482.728	0.84357	0.205687	4.10123	4.10959e-05	0.00286822	SOX (Mammalian SRY box) family [Source:UniProtKB/TrEMBL;Acc:Q17922]
WBGene00000911	daf-15	2461.93	-1.58893	0.387745	-4.09788	4.16948e-05	0.00288823	DAF-15 [Source:UniProtKB/TrEMBL;Acc:Q68TI8]
WBGene00011236	R11A8.1	427.69	-1.86645	0.45549	-4.09768	4.17319e-05	0.00288823
WBGene00012678	Y39B6A.16	295.789	-1.06923	0.261197	-4.09357	4.24784e-05	0.00290345
WBGene00015126	B0303.4	1641.51	-1.59895	0.390452	-4.09513	4.2193e-05	0.00290345
WBGene00019651	K11D12.12	261.661	-1.03009	0.25161	-4.09399	4.24016e-05	0.00290345
WBGene00015028	B0207.5	22.5766	-2.18066	0.532907	-4.092	4.27662e-05	0.00291109
WBGene00006359	swp-1	1068.69	-1.45521	0.356098	-4.08654	4.37849e-05	0.00295611	Splicing factor (Suppressor of White aPricot) related [Source:UniProtKB/TrEMBL;Acc:H2KY78]
WBGene00008563	F07H5.13	839.921	-1.62883	0.398569	-4.08669	4.37563e-05	0.00295611
WBGene00013734	Y111B2A.10	1064.29	-1.01605	0.248991	-4.08068	4.49036e-05	0.00300709
WBGene00021559	Y45G5AM.7	1486.8	-1.89236	0.463686	-4.08113	4.48174e-05	0.00300709
WBGene00018860	vpat-1	896.497	0.807477	0.198009	4.07798	4.54278e-05	0.00302993	Vesicular PolyAmine Transporter [Source:UniProtKB/TrEMBL;Acc:A8WFM4]
WBGene00019261	H34I24.2	10523.4	0.953988	0.234171	4.07389	4.62344e-05	0.00307134
WBGene00010109	F55C10.5	338.434	0.795192	0.195355	4.0705	4.69133e-05	0.00309963
WBGene00018100	math-26	118.052	-1.62067	0.398209	-4.06989	4.70351e-05	0.00309963	MATH (Meprin-associated Traf homology) domain containing [Source:UniProtKB/TrEMBL;Acc:P91300]
WBGene00009200	F28C1.1	1494.76	-1.63054	0.401574	-4.06036	4.89967e-05	0.00321609
WBGene00011361	lyst-1	214.955	-1.75999	0.433609	-4.05893	4.92979e-05	0.00321828	LYSosomal Trafficking regulator protein [Source:UniProtKB/TrEMBL;Acc:G5EFC7]
WBGene00015328	C02B10.3	1001.81	0.78617	0.193763	4.05738	4.96254e-05	0.00321828	EGF-like domain-containing protein C02B10.3 [Source:UniProtKB/Swiss-Prot;Acc:O44443]
WBGene00020819	T26A5.2	879.076	-1.68352	0.414828	-4.05835	4.94202e-05	0.00321828
WBGene00045086	Y43B11AR.7	137.554	-2.11223	0.5207	-4.05652	4.98084e-05	0.00321828
WBGene00000490	che-11	19.9911	-1.79264	0.442096	-4.05487	5.01616e-05	0.0032285
WBGene00010050	F54D5.4	10296.9	0.89721	0.221429	4.05192	5.07999e-05	0.0032569
WBGene00016799	C50C3.1	1158.88	-1.27401	0.314921	-4.0455	5.22123e-05	0.00333453
WBGene00019117	nhr-144	82.8806	-1.50997	0.373423	-4.0436	5.26357e-05	0.0033465
WBGene00077531	F40G9.15	68.7038	-1.32885	0.328692	-4.04285	5.28043e-05	0.0033465
WBGene00018017	golg-2	1902.95	-1.63735	0.405093	-4.04191	5.30166e-05	0.00334713	GOLGi associated coiled-coil protein homolog [Source:UniProtKB/TrEMBL;Acc:Q19989]
WBGene00006810	unc-78	2045.59	0.620404	0.153692	4.03667	5.42145e-05	0.00339682	Actin-interacting protein 1 [Source:UniProtKB/Swiss-Prot;Acc:Q11176]
WBGene00010092	F55C5.2	91.1732	-2.18647	0.541627	-4.03685	5.41738e-05	0.00339682
WBGene00001613	glr-2	46.0499	-1.90767	0.473573	-4.02825	5.6194e-05	0.00345958	Glutamate receptor 2 [Source:UniProtKB/Swiss-Prot;Acc:Q10914]
WBGene00003472	mtk-1	1472.4	-1.62145	0.402407	-4.02938	5.59247e-05	0.00345958	MTK1/MEKK4 homolog [Source:UniProtKB/TrEMBL;Acc:O01837]
WBGene00003925	pas-4	9701.68	0.892894	0.221637	4.02863	5.61017e-05	0.00345958	Proteasome subunit alpha type-7 [Source:UniProtKB/Swiss-Prot;Acc:Q95005]
WBGene00009124	rtel-1	937.982	-2.18102	0.541469	-4.02796	5.62619e-05	0.00345958	Regulator of telomere elongation helicase 1 homolog [Source:UniProtKB/Swiss-Prot;Acc:Q93575]
WBGene00014134	ZK896.3	101.028	-1.52591	0.378731	-4.029	5.60135e-05	0.00345958
WBGene00012932	Y47D3A.21	2350.43	0.729338	0.181128	4.02665	5.65772e-05	0.00346609	Density-regulated protein homolog [Source:UniProtKB/Swiss-Prot;Acc:Q9NAH4]
WBGene00008536	F02H6.3	473.819	-2.42711	0.603034	-4.02484	5.70141e-05	0.00347997
WBGene00019729	M02D8.3	936.55	-1.29033	0.320706	-4.02341	5.73625e-05	0.00348836
WBGene00004726	sas-4	1174.32	-1.68021	0.417743	-4.02212	5.76755e-05	0.00349454	Spindle assembly abnormal protein 4 [Source:UniProtKB/Swiss-Prot;Acc:P34402]
WBGene00001860	him-1	3348	-1.71517	0.426546	-4.02105	5.79384e-05	0.00349766	Structural maintenance of chromosomes protein 1 [Source:UniProtKB/Swiss-Prot;Acc:O01789]
WBGene00019988	R09F10.5	185.391	0.877661	0.218397	4.01865	5.85336e-05	0.00352074
WBGene00002256	lbp-4	1806.75	0.734748	0.182881	4.01763	5.87852e-05	0.00352307	Fatty acid-binding protein homolog 4 [Source:UniProtKB/Swiss-Prot;Acc:Q23092]
WBGene00012382	ttr-16	9823.61	0.971784	0.242019	4.01532	5.93648e-05	0.00354496	Transthyretin-like protein 16 [Source:UniProtKB/Swiss-Prot;Acc:P55955]
WBGene00011248	R11D1.10	513.737	-1.57077	0.391403	-4.01316	5.99106e-05	0.00356468
WBGene00004140	ebax-1	920.167	-0.66915	0.166886	-4.00963	6.08141e-05	0.00360547	Elongin-B/C E3 ligase in AXon guidance [Source:UniProtKB/TrEMBL;Acc:Q21875]
WBGene00000094	agt-2	514.379	-1.99196	0.49774	-4.00201	6.28073e-05	0.00371034	AlkylGuanine DNA alkylTransferase [Source:UniProtKB/TrEMBL;Acc:Q19263]
WBGene00006390	taf-8	1141.05	-2.13272	0.533104	-4.00058	6.31887e-05	0.00371959	TAF (TBP-associated transcription factor) family [Source:UniProtKB/TrEMBL;Acc:Q8WQ97]
WBGene00023401		67.1113	-1.75075	0.437828	-3.99872	6.36873e-05	0.00373564
WBGene00003721	nhr-131	482.779	0.701296	0.175539	3.9951	6.46682e-05	0.00377978	Nuclear Hormone Receptor family [Source:UniProtKB/TrEMBL;Acc:O16968]
WBGene00010640	K07F5.16	213.444	-1.18539	0.296782	-3.99414	6.49299e-05	0.00378171
WBGene00010539	ttr-2	18327	1.01166	0.253736	3.98707	6.68948e-05	0.00388248	Transthyretin-like protein 2 [Source:UniProtKB/Swiss-Prot;Acc:P34500]
WBGene00001250	elt-2	981.628	0.794163	0.199297	3.98483	6.75283e-05	0.00389373	Transcription factor elt-2 [Source:UniProtKB/Swiss-Prot;Acc:Q10655]
WBGene00012337	W07G4.3	1759.36	-1.12063	0.281232	-3.98472	6.75595e-05	0.00389373
WBGene00008415	mce-1	2305.04	0.730497	0.183437	3.98228	6.82559e-05	0.00392021	Methylmalonyl-CoA Epimerase; Mitochondrial methylmalonyl-CoA epimerase [Source:UniProtKB/TrEMBL;Acc:G5EEG4]
WBGene00000271	brf-1	1414.8	-1.88808	0.4744	-3.97993	6.89357e-05	0.00393532	BRF (Transcription factor) homolog [Source:UniProtKB/TrEMBL;Acc:A0A131MCT5]
WBGene00009173	prom-1	1017.13	-1.60433	0.403126	-3.97973	6.89947e-05	0.00393532	PRogression Of Meiosis [Source:UniProtKB/TrEMBL;Acc:G5EDC7]
WBGene00019075	F59A3.2	771.662	-1.54981	0.389648	-3.97745	6.96594e-05	0.0039483
WBGene00044696	F52E1.14	11789.8	0.880468	0.221373	3.97731	6.96998e-05	0.0039483
WBGene00003129	map-1	3809.51	0.982381	0.247058	3.97632	6.99896e-05	0.00395119	Methionine AminoPeptidase [Source:UniProtKB/TrEMBL;Acc:U4PBI7]
WBGene00018483	F45F2.11	2704.03	-1.67309	0.420872	-3.97529	7.02946e-05	0.00395491
WBGene00015245	B0524.6	429.608	-2.01493	0.506971	-3.97444	7.05437e-05	0.00395547
WBGene00016603	met-1	2711.69	-1.52957	0.385391	-3.96888	7.22114e-05	0.0040353	Histone-lysine N-methyltransferase [Source:UniProtKB/TrEMBL;Acc:A4LBC3]
WBGene00045268	ttr-42	1870.64	1.28785	0.324711	3.96614	7.30467e-05	0.00406823	TransThyretin-Related family domain [Source:UniProtKB/TrEMBL;Acc:A2V8C3]
WBGene00015451	C04F5.9	563.846	-1.69348	0.427399	-3.9623	7.42308e-05	0.00410653
WBGene00021832	Y54E10A.12	802.132	-1.78626	0.450766	-3.96273	7.40985e-05	0.00410653
WBGene00014108	ZK856.7	1006.72	0.931916	0.235302	3.96052	7.47874e-05	0.00412353
WBGene00007131	pals-26	56.4518	-1.69027	0.426932	-3.95911	7.52292e-05	0.00413411	Protein containing ALS2cr12 (ALS2CR12) domain [Source:UniProtKB/TrEMBL;Acc:Q17466]
WBGene00004468	rpn-12	5661.19	0.67877	0.171648	3.95444	7.67145e-05	0.00414999	26S proteasome non-ATPase regulatory subunit 8 [Source:UniProtKB/Swiss-Prot;Acc:Q23449]
WBGene00015642	C09E7.8	337.726	-1.60245	0.405009	-3.95657	7.60335e-05	0.00414999
WBGene00017274	F08F8.9	2260.14	-1.61785	0.409142	-3.95426	7.67726e-05	0.00414999
WBGene00019645	swt-7	1998.1	1.05394	0.26644	3.95564	7.63291e-05	0.00414999	Sugar transporter SWEET [Source:UniProtKB/TrEMBL;Acc:O44620]
WBGene00022198	Y71H2B.11	173.468	-1.12071	0.283319	-3.95564	7.63292e-05	0.00414999
WBGene00000796	crn-3	2046.84	-2.01979	0.511127	-3.95164	7.76165e-05	0.00418194	Cell death-related nuclease 3; Cell-death-Related Nuclease [Source:UniProtKB/TrEMBL;Acc:G5EBX6]
WBGene00017079	D2096.12	921.038	-1.67898	0.425071	-3.94988	7.81898e-05	0.00419915
WBGene00007621	C16C2.4	1779.63	-1.94951	0.494172	-3.94501	7.9795e-05	0.00427149
WBGene00009711	F44G4.1	2518.12	-1.49588	0.379275	-3.94406	8.01145e-05	0.00427476	Brix domain-containing protein F44G4.1 [Source:UniProtKB/Swiss-Prot;Acc:P54073]
WBGene00015988	C18H2.1	42.154	-1.27532	0.323605	-3.94098	8.11488e-05	0.00431435
WBGene00021153	Y4C6A.3	680.82	-1.9023	0.48278	-3.9403	8.13783e-05	0.00431435
WBGene00001284	emb-30	1512.89	-1.52674	0.387765	-3.93728	8.24103e-05	0.00434124	Abnormal embryogenesis protein 30 [Source:UniProtKB/Swiss-Prot;Acc:P34441]
WBGene00013155	Y53F4B.8	62.593	-1.78382	0.452991	-3.93787	8.22081e-05	0.00434124
WBGene00002254	lbp-2	14295.6	1.01449	0.258131	3.93015	8.48943e-05	0.00445789	Fatty acid-binding protein homolog 2 [Source:UniProtKB/Swiss-Prot;Acc:Q20224]
WBGene00017952	F31E3.6	60.6455	-1.7519	0.446113	-3.92703	8.60015e-05	0.00450174
WBGene00003210	mel-28	4782	-1.50322	0.383125	-3.92356	8.72487e-05	0.00455262
WBGene00010313	F59B2.11	12.3339	-2.54718	0.649354	-3.92264	8.75846e-05	0.00455577
WBGene00004134	myrf-1	1023.43	-1.22057	0.311263	-3.92133	8.80617e-05	0.00456623	Myelin regulatory factor related [Source:UniProtKB/TrEMBL;Acc:G5EFI7]
WBGene00002850	let-716	2926.47	-1.45064	0.37021	-3.91842	8.91316e-05	0.00460727
WBGene00008749	F13E6.5	1040.61	0.720022	0.183888	3.91554	9.02021e-05	0.00464808
WBGene00006961	xnp-1	3417.76	-1.52169	0.389644	-3.90533	9.40974e-05	0.00480391	Transcriptional regulator ATRX homolog [Source:UniProtKB/Swiss-Prot;Acc:Q9U7E0]
WBGene00012258	W04G3.5	2688.42	0.922982	0.236311	3.9058	9.39159e-05	0.00480391
WBGene00016979	C56G2.4	135.902	1.01067	0.258764	3.90577	9.39261e-05	0.00480391
WBGene00004044	plk-3	4147.28	-2.03093	0.520242	-3.90382	9.46866e-05	0.00481911	Serine/threonine-protein kinase plk-3 [Source:UniProtKB/Swiss-Prot;Acc:Q20845]
WBGene00000931	dao-5	6219.84	-0.893076	0.228817	-3.90302	9.49989e-05	0.00482017	Dauer or Aging adult Overexpression [Source:UniProtKB/TrEMBL;Acc:Q9XVS4]
WBGene00002090	ins-7	156.466	1.15018	0.294826	3.90121	9.57117e-05	0.00484149	Probable insulin-like peptide beta-type 4 [Source:UniProtKB/Swiss-Prot;Acc:Q23430]
WBGene00014198	ZK1053.3	29.1947	-1.72324	0.44234	-3.89573	9.79049e-05	0.00493733
WBGene00018265	nhr-182	273.698	0.760036	0.195141	3.8948	9.82803e-05	0.0049412	Nuclear Hormone Receptor family [Source:UniProtKB/TrEMBL;Acc:O16676]
WBGene00007746	C26D10.6	476.571	0.937818	0.241195	3.88821	0.000100987	0.00506187
WBGene00019168	H06I04.3	3353.3	-1.5412	0.396528	-3.88673	0.000101603	0.00507737	Putative rRNA methyltransferase [Source:UniProtKB/TrEMBL;Acc:Q5CCJ2]
WBGene00021000	W03F9.2	357.079	-0.834543	0.214848	-3.88434	0.000102608	0.00511219
WBGene00013602	Y87G2A.16	86.7936	-1.6824	0.433344	-3.88236	0.000103449	0.00513857
WBGene00021485	Y40A1A.3	32.7148	-1.44488	0.372475	-3.87914	0.000104826	0.00517898
WBGene00219816	C14E2.12	57.2931	-2.33868	0.602908	-3.879	0.000104888	0.00517898	NA
WBGene00007121	B0250.4	80.4383	-2.21485	0.571221	-3.87739	0.000105584	0.00519782
WBGene00007227	C01G6.5	4065.55	-1.9089	0.492795	-3.87363	0.000107228	0.00524769
WBGene00014888	Y43F8B.8	10.3559	-2.56387	0.66188	-3.87362	0.000107232	0.00524769
WBGene00004874	smc-4	5148.33	-1.28068	0.330711	-3.87251	0.000107722	0.00525612	Structural maintenance of chromosomes protein 4 [Source:UniProtKB/Swiss-Prot;Acc:Q20060]
WBGene00009027	F21G4.6	323.225	-0.971493	0.250963	-3.87106	0.000108365	0.00527195
WBGene00019133	F59H6.2	60.7709	-2.36754	0.612232	-3.86706	0.000110156	0.00532775
WBGene00022735	ZK418.6	194.423	0.721728	0.186615	3.86747	0.000109969	0.00532775
WBGene00010306	golg-4	724.139	-1.80329	0.466979	-3.8616	0.000112646	0.00543228	GOLGi associated coiled-coil protein homolog [Source:UniProtKB/TrEMBL;Acc:G5EEK2]
WBGene00077443	Y71A12B.19	23.2165	-1.67531	0.434266	-3.85779	0.000114417	0.00550168
WBGene00010475	K01F9.2	281.64	0.732138	0.189941	3.85456	0.000115938	0.00555865
WBGene00011209	R10E8.3	21.6835	-1.53746	0.399073	-3.85257	0.000116884	0.00558779
WBGene00003593	nfm-1	676.975	-1.35362	0.351434	-3.8517	0.000117302	0.00559164	NeuroFibroMatosis homolog [Source:UniProtKB/TrEMBL;Acc:H2KYX3]
WBGene00010659	K08D8.5	1892.02	1.12166	0.291458	3.84843	0.000118876	0.00560861
WBGene00016151	smc-5	3145.38	-1.78008	0.462581	-3.84815	0.000119015	0.00560861	Structural maintenance of chromosomes protein 5 [Source:UniProtKB/Swiss-Prot;Acc:Q18237]
WBGene00020407	chil-24	216.289	0.768644	0.199685	3.84929	0.00011846	0.00560861	CHItinase-Like [Source:UniProtKB/TrEMBL;Acc:Q9TZF2]
WBGene00045414	T19H5.7	106.986	1.60681	0.417508	3.84857	0.000118811	0.00560861
WBGene00008295	nlp-39	1276.56	1.32388	0.344542	3.84242	0.000121826	0.00572478	Neuropeptide-Like Protein [Source:UniProtKB/TrEMBL;Acc:O17707]
WBGene00003786	npa-1	7136.98	-1.47295	0.38382	-3.83761	0.000124239	0.00581795	Nematode Polyprotein Allergen related; Nematode polyprotein allergen related, post-translationnally cleaved, the diverse 14.5 kDa cleavage products bind lipids and retinol (164.6 kD) (Npa-1) [Source:UniProtKB/TrEMBL;Acc:G5EF32]
WBGene00012239	W04A8.4	1151.29	-1.28605	0.335166	-3.83707	0.000124512	0.00581795
WBGene00014243	dcaf-1	3277.7	-1.15885	0.302117	-3.83576	0.000125179	0.00583264	DDB1- and CUL4-associated factor homolog 1 [Source:UniProtKB/Swiss-Prot;Acc:Q21106]
WBGene00013690	hprt-1	3384	0.83463	0.217969	3.82912	0.0001286	0.00597521	Hypoxanthine PhosphoRibosylTransferase homolog [Source:UniProtKB/TrEMBL;Acc:Q9NF11]
WBGene00009634	nspc-9	891.169	1.04204	0.272389	3.82554	0.000130484	0.00601773	Nematode Specific Peptide family, group C [Source:UniProtKB/TrEMBL;Acc:Q20345]
WBGene00015017	B0205.1	1732.14	-1.16842	0.305444	-3.82531	0.000130607	0.00601773
WBGene00044728	Y53F4B.45	334.795	-2.05884	0.538097	-3.82614	0.000130167	0.00601773
WBGene00003007	lin-18	478.424	0.74541	0.194939	3.82382	0.000131401	0.00602079	Inactive tyrosine-protein kinase RYK [Source:UniProtKB/Swiss-Prot;Acc:G5EGT9]
WBGene00020234	T05A12.3	1821.67	-1.33547	0.349199	-3.82437	0.000131105	0.00602079
WBGene00004796	sid-2	953.367	1.02133	0.267415	3.81927	0.000133847	0.00611593	Systemic RNA interference defective protein 2 [Source:UniProtKB/Swiss-Prot;Acc:G5EEV9]
WBGene00012184	mnr-1	884.13	0.896954	0.234892	3.81857	0.000134225	0.00611629	MeNoRin (Dendritic branching protein) [Source:UniProtKB/TrEMBL;Acc:O45879]
WBGene00007647	C17E4.10	1785.8	-1.67259	0.438694	-3.81266	0.000137481	0.00624157
WBGene00021172	Y8A9A.3	10.3236	-2.82707	0.741583	-3.81221	0.000137729	0.00624157
WBGene00009606	F40G12.11	687.997	-2.14982	0.564673	-3.8072	0.00014055	0.00627032
WBGene00010130	vha-14	8726.11	0.691454	0.181556	3.8085	0.000139814	0.00627032	V-type proton ATPase subunit D [Source:UniProtKB/Swiss-Prot;Acc:P34462]
WBGene00019813	ger-1	762.051	0.921361	0.241945	3.80815	0.000140011	0.00627032	GDP-L-fucose synthase [Source:UniProtKB/Swiss-Prot;Acc:G5EER4]
WBGene00020010	R11G1.1	53.5947	-1.99055	0.522461	-3.80995	0.000138992	0.00627032
WBGene00022667	ZK154.5	868.794	-1.44392	0.379072	-3.8091	0.000139473	0.00627032
WBGene00194679	T26C11.9	49.3414	-1.2783	0.335772	-3.80704	0.000140638	0.00627032
WBGene00004204	swsn-4	5363	-1.75008	0.459852	-3.80574	0.000141379	0.00628642	SWI/SNF nucleosome remodeling complex component; SWI2/SNF2-like protein [Source:UniProtKB/TrEMBL;Acc:G5EF53]
WBGene00001829	hcp-1	4889.86	-1.5422	0.405339	-3.80472	0.000141963	0.00629545	HoloCentric chromosome binding Protein [Source:UniProtKB/TrEMBL;Acc:O76447]
WBGene00001073	dpy-11	9070.06	0.465313	0.122377	3.8023	0.000143357	0.00630134	DumPY: shorter than wild-type; Thioredoxin-like protein DPY-11 [Source:UniProtKB/TrEMBL;Acc:G5EC91]
WBGene00014089	ZK822.1	144.099	-1.77305	0.466365	-3.80185	0.000143619	0.00630134
WBGene00020346	rbm-5	1818.53	-1.40664	0.369948	-3.80225	0.000143385	0.00630134	RNA Binding Motif protein homolog [Source:UniProtKB/TrEMBL;Acc:Q86NK1]
WBGene00219859	C49F5.11	27.9836	-2.01234	0.529092	-3.8034	0.000142726	0.00630134	NA
WBGene00009127	clsp-1	1874.92	-1.49329	0.392926	-3.80043	0.000144448	0.00632094	CLaSPin homolog [Source:UniProtKB/TrEMBL;Acc:O17838]
WBGene00011310	T01B4.3	236.878	0.870126	0.229122	3.79766	0.00014607	0.00635836
WBGene00016751	C48E7.6	98.8596	-1.32231	0.348192	-3.79765	0.000146072	0.00635836
WBGene00219374	C25A11.10	256.537	-1.36675	0.359995	-3.79659	0.000146703	0.00636905
WBGene00009638	nspc-14	996.075	0.989158	0.260789	3.79295	0.000148869	0.00642933	Nematode Specific Peptide family, group C [Source:UniProtKB/TrEMBL;Acc:G5EF55]
WBGene00015163	B0361.9	1894.65	0.908188	0.23942	3.79328	0.00014867	0.00642933
WBGene00002201	kin-18	3154.62	-1.60213	0.422667	-3.79053	0.000150323	0.00647525	Serine/threonine-protein kinase SULU [Source:UniProtKB/Swiss-Prot;Acc:P46549]
WBGene00013247	Y57A10A.2	453.248	-0.769004	0.203018	-3.78787	0.000151946	0.00651122
WBGene00015122	B0302.5	823.487	0.607277	0.160308	3.78819	0.000151747	0.00651122
WBGene00016154	C27A12.2	1317.91	-1.7466	0.461223	-3.78689	0.000152547	0.0065201
WBGene00010963	nduo-4	10125.8	-1.80862	0.47788	-3.78468	0.000153906	0.00654437	NADH-ubiquinone oxidoreductase chain 4 [Source:UniProtKB/Swiss-Prot;Acc:P24892]
WBGene00235094	K08D9.9	429.688	1.60236	0.423339	3.78505	0.000153676	0.00654437
WBGene00021607	Y46H3C.7	26.3392	-3.38307	0.894561	-3.78183	0.000155682	0.00660292
WBGene00016305	fbxc-57	91.4166	-1.2141	0.321106	-3.781	0.000156202	0.00660803
WBGene00004747	sdc-3	468.036	-1.64099	0.434367	-3.7779	0.000158158	0.00667369	Zinc finger protein sdc-3 [Source:UniProtKB/Swiss-Prot;Acc:P34706]
WBGene00009640	nspc-10	1175.79	1.02554	0.271578	3.77624	0.000159214	0.00668415	Nematode Specific Peptide family, group C [Source:UniProtKB/TrEMBL;Acc:Q8I4J0]
WBGene00023036	F39E9.10	115.753	-1.27832	0.338473	-3.77674	0.000158897	0.00668415
WBGene00219571	linc-15	104.095	-1.82307	0.483072	-3.7739	0.000160713	0.00673002
WBGene00003576	ndc-80	1998.87	-2.0155	0.534842	-3.76841	0.00016429	0.00685586	Kinetochore protein ndc-80 [Source:UniProtKB/Swiss-Prot;Acc:Q17635]
WBGene00004893	sms-2	998.953	0.671007	0.178079	3.76802	0.000164547	0.00685586	Phosphatidylcholine:ceramide cholinephosphotransferase 2 [Source:UniProtKB/Swiss-Prot;Acc:Q20735]
WBGene00002221	klp-10	507.056	-1.73006	0.459349	-3.76633	0.000165665	0.00687007
WBGene00021375	Y37E11B.2	77.4466	-1.21077	0.321479	-3.76625	0.000165719	0.00687007
WBGene00019002	F57B10.4	1207.3	-1.90884	0.507252	-3.76309	0.000167824	0.00693993
WBGene00016788	C49G7.10	820.75	-0.958779	0.254885	-3.76161	0.000168823	0.00696384
WBGene00014904	Y49E10.26	140.264	-2.37426	0.631313	-3.76083	0.000169351	0.00696824
WBGene00009996	F53F4.14	1582.53	-2.12646	0.565762	-3.75858	0.00017088	0.00700103
WBGene00015037	B0212.3	473.397	-1.46217	0.389039	-3.75841	0.000170994	0.00700103
WBGene00020111	R151.8	1100.4	-1.71992	0.457956	-3.75564	0.000172901	0.00706164
WBGene00219728	linc-16	38.2678	-1.61488	0.430125	-3.75443	0.000173734	0.00707815	NA
WBGene00011726	lpr-2	53.6067	-1.61677	0.430702	-3.75379	0.000174178	0.00707882	LiPocalin-Related protein [Source:UniProtKB/TrEMBL;Acc:G5EEB8]
WBGene00008648	F10D11.2	885.15	-1.87217	0.499119	-3.75095	0.000176169	0.00713551
WBGene00021952	vha-19	9314.87	0.700443	0.186756	3.75057	0.000176436	0.00713551	Vacuolar H ATPase [Source:UniProtKB/TrEMBL;Acc:Q9TYW1]
WBGene00015851	C16C8.13	68.0436	-2.0997	0.560235	-3.74788	0.000178335	0.00719471
WBGene00020031	suco-1	3100.31	-1.45708	0.388927	-3.74642	0.000179376	0.00721911	SUn (SUN) domain Containing Ossification factor homolog [Source:UniProtKB/TrEMBL;Acc:O61794]
WBGene00010680	K08F4.12	31.41	1.45133	0.387527	3.7451	0.000180318	0.00723944
WBGene00015517	C06A8.8	320.538	0.800567	0.213804	3.7444	0.000180827	0.00724229
WBGene00020729	T23E1.2	131.566	-1.20817	0.32279	-3.74288	0.00018192	0.00726847
WBGene00017197	F07C3.9	74.2664	1.02145	0.273072	3.74058	0.000183599	0.00731784
WBGene00015581	C07H6.4	2061.89	-1.46256	0.391245	-3.73823	0.000185319	0.00736865
WBGene00008130	fbxa-140	115.79	-1.33276	0.35664	-3.73699	0.000186239	0.00738748	F-box A protein [Source:UniProtKB/TrEMBL;Acc:O62104]
WBGene00206521	T02G5.15	18.3691	-1.90151	0.509443	-3.73252	0.000189575	0.00750182
WBGene00194812	F19B2.12	122.589	-1.06989	0.286768	-3.73085	0.000190838	0.00753378
WBGene00000226	atl-1	1744.56	-1.6257	0.436153	-3.72735	0.000193501	0.00762073	Serine/threonine-protein kinase ATR [Source:UniProtKB/Swiss-Prot;Acc:Q22258]
WBGene00219803	C06A1.12	454.115	-0.979564	0.262875	-3.72635	0.000194276	0.00763307	NA
WBGene00021556	Y45G5AM.3	1851.92	0.771263	0.20721	3.72214	0.000197543	0.00774302
WBGene00021543	Y43B11AR.1	1240.48	0.772264	0.207846	3.71556	0.000202755	0.00792855
WBGene00011083	glo-1	524.149	0.913972	0.246187	3.71251	0.000205211	0.00798297	Gut granule LOss; Rab GTPase GLO-1 [Source:UniProtKB/TrEMBL;Acc:G5EBF0]
WBGene00011793	T16A9.3	70.1535	-1.30265	0.350926	-3.71204	0.000205595	0.00798297
WBGene00014790	H03G16.3	12.0613	-1.95837	0.527425	-3.71307	0.000204757	0.00798297
WBGene00016030	C24A1.3	601.661	0.614047	0.165528	3.70963	0.000207563	0.0080405
WBGene00019011	F57C9.4	1606.39	-1.59545	0.430307	-3.7077	0.000209154	0.00808321
WBGene00020738	T23F2.5	3658.59	0.956288	0.258035	3.70604	0.000210528	0.00811735	UPF0057 membrane protein T23F2.5 [Source:UniProtKB/Swiss-Prot;Acc:Q22702]
WBGene00016652	got-2.1	1651.36	-0.574897	0.155185	-3.7046	0.000211729	0.00814466	Aspartate aminotransferase [Source:UniProtKB/TrEMBL;Acc:O01804]
WBGene00021826	txl-1	4534.51	0.886361	0.239314	3.70376	0.000212426	0.00815252	ThioredoXin-Like; Thioredoxin-like protein; Thioredoxin-like protein TXL [Source:UniProtKB/TrEMBL;Acc:G5EES9]
WBGene00021311	thoc-5	1160.85	-1.59863	0.432149	-3.69925	0.00021624	0.00826058
WBGene00045419	lsy-12	1603.11	-1.30125	0.351759	-3.69926	0.00021623	0.00826058	Histone acetyltransferase [Source:UniProtKB/TrEMBL;Acc:K8ERR8]
WBGene00001230	eif-3.G	6386.08	0.460057	0.124488	3.69559	0.000219373	0.00836094	Eukaryotic translation initiation factor 3 subunit G [Source:UniProtKB/Swiss-Prot;Acc:Q19706]
WBGene00013726	Y106G6H.16	336.539	-1.10561	0.29933	-3.69362	0.000221082	0.00840671
WBGene00007978	C36B1.11	2026.42	-1.78094	0.482449	-3.69145	0.000222979	0.00845835
WBGene00008926	F17H10.2	1195.04	0.898562	0.243453	3.6909	0.000223463	0.00845835
WBGene00019254	H31G24.3	213.253	-1.15214	0.312216	-3.6902	0.000224076	0.00846218
WBGene00017688	ttr-35	1323.19	0.952105	0.258238	3.68693	0.000226973	0.00855207	TransThyretin-Related family domain [Source:UniProtKB/TrEMBL;Acc:Q19694]
WBGene00010079	F55A11.6	587.03	0.598979	0.162618	3.68336	0.000230179	0.00865317
WBGene00016800	C50C3.2	33.4417	-2.20569	0.599559	-3.67885	0.000234284	0.00878751
WBGene00014307	F07H5.3	2333.16	-1.97691	0.537667	-3.67683	0.000236154	0.00883761
WBGene00009293	F31D4.8	253.375	0.94252	0.256427	3.67559	0.000237304	0.0088606
WBGene00011771	T14G8.3	2335.64	-1.10269	0.300069	-3.67479	0.000238041	0.0088681
WBGene00011532	chaf-1	4094.3	-1.66715	0.453964	-3.67243	0.000240254	0.00891183	CHromatin Assembly Factor [Source:UniProtKB/TrEMBL;Acc:Q9U380]
WBGene00013452	Y67A10A.3	13.5371	-3.17468	0.864472	-3.67239	0.000240292	0.00891183
WBGene00010850	M04C3.1	363.03	-1.38018	0.376088	-3.66983	0.000242709	0.00896768
WBGene00249808	Y48G8AL.20	488.271	-1.14639	0.312398	-3.66965	0.000242882	0.00896768
WBGene00006375	syp-1	1219.58	-1.57387	0.429113	-3.66772	0.000244718	0.00900717	Synaptonemal complex protein SYP-1 [Source:UniProtKB/TrEMBL;Acc:G5EGS8]
WBGene00013516	Y73F4A.3	316.608	1.01903	0.277862	3.66739	0.000245041	0.00900717
WBGene00050946	M162.12	21.7594	-1.67512	0.458471	-3.6537	0.000258484	0.00948022
WBGene00001596	gld-2	2246.75	-1.56723	0.429138	-3.65205	0.000260155	0.00949894	Poly(A) RNA polymerase gld-2 [Source:UniProtKB/Swiss-Prot;Acc:O17087]
WBGene00007660	pals-6	102.324	-1.52538	0.41768	-3.65204	0.000260169	0.00949894	Protein containing ALS2cr12 (ALS2CR12) domain [Source:UniProtKB/TrEMBL;Acc:O45258]
WBGene00008085	C44C10.4	272.732	-1.18085	0.323387	-3.6515	0.000260717	0.00949894
WBGene00012439	Y12A6A.1	664.666	0.948941	0.259926	3.65081	0.000261419	0.00950357
WBGene00017708	F22E5.9	593.31	-1.09655	0.30056	-3.64834	0.000263938	0.00957411
WBGene00015016	bath-14	64.3062	-1.33018	0.365081	-3.64353	0.000268922	0.00971298
WBGene00021816	Y53G8AR.9	3289.91	0.795771	0.218408	3.64351	0.00026894	0.00971298
WBGene00003012	lin-26	2055.3	-1.15649	0.317539	-3.64206	0.000270466	0.00973995	Transcription factor lin-26 [Source:UniProtKB/Swiss-Prot;Acc:Q27355]
WBGene00009130	F25H5.8	1082.8	1.16208	0.319204	3.64056	0.000272043	0.00973995
WBGene00017742	nfyc-1	1346.11	-0.735665	0.202016	-3.64163	0.000270921	0.00973995	Nuclear transcription factor Y subunit gamma [Source:UniProtKB/TrEMBL;Acc:O17072]
WBGene00020412	T10E9.2	1178.4	-1.90808	0.524115	-3.64058	0.000272026	0.00973995
WBGene00019592	K09F6.9	153.771	-2.23422	0.61388	-3.63951	0.00027316	0.00975883
WBGene00009059	chw-1	408.605	0.922173	0.253454	3.63843	0.000274309	0.00977874	CHp/Wrch Rho-like protein homolog [Source:UniProtKB/TrEMBL;Acc:Q19739]
WBGene00015495	C05E11.6	48.8776	-1.63236	0.448781	-3.63733	0.000275482	0.00979947
WBGene00009672	F43G9.12	1612.78	-1.26978	0.349247	-3.63575	0.000277174	0.00983849
WBGene00003572	ncx-7	373.817	0.744304	0.204993	3.63088	0.000282459	0.0100046	Putative sodium/calcium exchanger 7 [Source:UniProtKB/Swiss-Prot;Acc:P34322]
WBGene00010569	scbp-2	296.751	-0.918213	0.253107	-3.62776	0.000285887	0.0100956	SECIS (SeCis) Binding Protein homolog [Source:UniProtKB/TrEMBL;Acc:Q95ZR7]
WBGene00018035	sek-4	301.276	0.710177	0.195779	3.62744	0.000286249	0.0100956	SAPK/ERK kinase [Source:UniProtKB/TrEMBL;Acc:Q58AU8]
WBGene00014994	ZK1225.7	54.9774	-1.3282	0.36637	-3.6253	0.000288626	0.0101372
WBGene00019125	ddl-1	482.712	-0.804169	0.221823	-3.62528	0.000288653	0.0101372	WASH complex subunit homolog 3 [Source:UniProtKB/Swiss-Prot;Acc:O01901]
WBGene00012879	fbxa-215	3276.74	-2.16297	0.597004	-3.62305	0.00029115	0.0101816	F-box A protein [Source:UniProtKB/TrEMBL;Acc:O62474]
WBGene00013704	Y106G6D.8	1025.11	0.979233	0.270265	3.62323	0.000290949	0.0101816
WBGene00001352	evl-14	1780.38	-1.90175	0.525145	-3.62138	0.000293036	0.0102094
WBGene00010781	K11H3.4	475.713	-1.46596	0.404942	-3.62017	0.000294413	0.0102094
WBGene00017004	nrd-1	3262.41	-1.17118	0.32347	-3.62066	0.000293847	0.0102094	NRD (Yeast Nuclear pre-mRNA Down-regulation) homolog [Source:UniProtKB/TrEMBL;Acc:O01864]
WBGene00022333	fbxa-27	74.5275	1.13734	0.314115	3.62079	0.00029371	0.0102094	F-box A protein [Source:UniProtKB/TrEMBL;Acc:Q95XB5]
WBGene00015926	C17H11.6	1551.86	0.480398	0.132747	3.6189	0.000295857	0.0102269
WBGene00021316	Y32H12A.8	1248.5	-1.11667	0.308587	-3.61864	0.000296153	0.0102269
WBGene00050948	Y48B6A.16	41.976	-1.66452	0.460369	-3.61562	0.000299632	0.0103254
WBGene00012279	W05B10.4	157.457	0.908998	0.251501	3.61429	0.000301174	0.0103374
WBGene00016203	tag-250	1024.43	0.427662	0.118327	3.61424	0.000301229	0.0103374	Putative protein tag-250 [Source:UniProtKB/Swiss-Prot;Acc:P34344]
WBGene00001389	far-5	325.294	0.856441	0.237066	3.61267	0.000303061	0.0103787	Fatty Acid/Retinol binding protein [Source:UniProtKB/TrEMBL;Acc:Q19480]
WBGene00003903	pab-2	5500.98	-0.627252	0.173681	-3.61151	0.000304419	0.0104037	Polyadenylate-binding protein [Source:UniProtKB/TrEMBL;Acc:Q19581]
WBGene00004933	sod-4	975.142	0.938733	0.259969	3.61095	0.000305079	0.0104048	Extracellular superoxide dismutase [Cu-Zn] [Source:UniProtKB/Swiss-Prot;Acc:P34461]
WBGene00001232	eif-3.I	11329	0.849475	0.235444	3.60797	0.000308597	0.0104918	Eukaryotic translation initiation factor 3 subunit I [Source:UniProtKB/Swiss-Prot;Acc:Q965S8]
WBGene00003658	nhr-68	1647.22	0.634898	0.175983	3.60772	0.0003089	0.0104918	Nuclear Hormone Receptor family [Source:UniProtKB/TrEMBL;Acc:H8ESE6]
WBGene00007184	ctr-9	3822.59	-1.5265	0.423386	-3.60547	0.000311593	0.0105196	RNA polymerase-associated protein CTR9 [Source:UniProtKB/Swiss-Prot;Acc:Q03560]
WBGene00010660	K08D8.6	1846.21	0.735463	0.203946	3.60617	0.00031075	0.0105196
WBGene00014135	ZK896.4	235.404	0.922525	0.255893	3.60512	0.000312011	0.0105196
WBGene00016409	sumv-1	1872.34	-1.3245	0.367417	-3.60491	0.000312262	0.0105196
WBGene00015501	C06A5.3	1718.01	-1.46087	0.405311	-3.60432	0.000312976	0.0105222
WBGene00019213	H20E11.1	576.14	0.854271	0.237097	3.60305	0.000314508	0.0105523
WBGene00006833	unc-108	12363.3	0.75987	0.210975	3.6017	0.000316145	0.0105857	Rab-2 [Source:UniProtKB/TrEMBL;Acc:I7FN62]
WBGene00001644	gly-19	278.713	0.740303	0.205689	3.59913	0.000319278	0.0105944	GLY-19; GLYcosylation related [Source:UniProtKB/TrEMBL;Acc:G5EBK7]
WBGene00005009	spr-4	1556.59	-1.41175	0.392363	-3.59806	0.000320603	0.0105944	Suppressor of presenilin protein 4 [Source:UniProtKB/Swiss-Prot;Acc:O17582]
WBGene00012383	ttr-17	1346.77	0.953261	0.264804	3.59987	0.000318375	0.0105944	TransThyretin-Related family domain [Source:UniProtKB/TrEMBL;Acc:Q9XWL1]
WBGene00015939	C18A3.1	464.706	-1.06624	0.296399	-3.59731	0.000321528	0.0105944	DNA N6-methyl methyltransferase [Source:UniProtKB/Swiss-Prot;Acc:Q09956]
WBGene00020214	attf-5	158.32	-1.66846	0.463652	-3.59852	0.00032003	0.0105944	AT hook Transcription Factor family [Source:UniProtKB/TrEMBL;Acc:A0A168HBV3]
WBGene00020585	clec-178	149.024	1.01593	0.282376	3.59778	0.000320941	0.0105944	C-type LECtin [Source:UniProtKB/TrEMBL;Acc:Q22591]
WBGene00022188	Y71H2AR.1	2224.13	0.829523	0.230482	3.59908	0.00031935	0.0105944
WBGene00077772	T02G6.10	35.3874	-1.73368	0.481589	-3.59991	0.000318328	0.0105944
WBGene00003421	msh-5	715.383	-1.40269	0.390734	-3.58988	0.000330835	0.0108578	MutS protein homolog 5 [Source:UniProtKB/Swiss-Prot;Acc:Q19272]
WBGene00020118	R155.4	12.0479	-2.30839	0.642974	-3.59018	0.000330455	0.0108578
WBGene00007627	ccdc-55	1699.97	-1.6852	0.469643	-3.58827	0.000332885	0.0109035	Nuclear speckle splicing regulatory protein 1 homolog [Source:UniProtKB/Swiss-Prot;Acc:Q09252]
WBGene00007258	hasp-1	837.958	-1.24769	0.347849	-3.58688	0.000334657	0.0109199	HASPin kinase related [Source:UniProtKB/TrEMBL;Acc:G5EE25]
WBGene00011139	R08B4.3	492.888	0.763649	0.212914	3.58666	0.000334941	0.0109199
WBGene00017441	F13H8.8	54.8018	-1.72476	0.480927	-3.58633	0.000335366	0.0109199
WBGene00001118	dyf-2	112.197	-1.0317	0.288027	-3.58197	0.000341015	0.0110171	WD repeat-containing protein dyf-2 [Source:UniProtKB/Swiss-Prot;Acc:G5ECZ4]
WBGene00004818	skr-12	553.424	0.931262	0.259916	3.58293	0.000339758	0.0110171	SKR-12; SKp1 Related (Ubiquitin ligase complex component); Skp1p homolog [Source:UniProtKB/TrEMBL;Acc:G5EGD5]
WBGene00009087	F23D12.3	84.9702	1.24448	0.347297	3.58333	0.000339244	0.0110171
WBGene00010957	nduo-6	1902.24	-2.35568	0.657578	-3.58236	0.00034051	0.0110171	NADH-ubiquinone oxidoreductase chain 6 [Source:UniProtKB/Swiss-Prot;Acc:P24885]
WBGene00003499	mut-2	1042.38	-1.68124	0.469793	-3.57868	0.000345331	0.0111347	MUTator [Source:UniProtKB/TrEMBL;Acc:Q8IA66]
WBGene00016170	C27F2.8	3213.02	-1.79093	0.500552	-3.57791	0.000346353	0.011146
WBGene00001595	gld-1	13677.1	-1.26503	0.353674	-3.57683	0.000347788	0.0111621	Female germline-specific tumor suppressor gld-1 [Source:UniProtKB/Swiss-Prot;Acc:Q17339]
WBGene00009450	ugt-58	1520.39	0.615133	0.172047	3.57538	0.00034972	0.0111621	Putative UDP-glucuronosyltransferase ugt-58 [Source:UniProtKB/Swiss-Prot;Acc:Q20086]
WBGene00013580	Y79H2A.3	2029.66	-0.963787	0.269591	-3.575	0.000350227	0.0111621
WBGene00021502	Y40D12A.1	618.437	-1.58289	0.44276	-3.57504	0.000350173	0.0111621
WBGene00077607	T10C6.16	18.0982	-1.73064	0.484095	-3.575	0.000350227	0.0111621
WBGene00020673	T22B7.4	344.86	-1.59434	0.446102	-3.57394	0.000351646	0.0111857
WBGene00002187	kgb-1	1413.72	0.630599	0.176523	3.57234	0.000353811	0.011233	GLH-binding kinase 1 [Source:UniProtKB/Swiss-Prot;Acc:O44408]
WBGene00006555	tbx-36	261.586	-2.05095	0.574406	-3.57055	0.000356229	0.0112881	Putative T-box protein 36 [Source:UniProtKB/Swiss-Prot;Acc:Q23622]
WBGene00004788	sft-4	3908.51	0.503891	0.141207	3.56847	0.000359079	0.0113352	Surfeit locus protein 4 homolog [Source:UniProtKB/Swiss-Prot;Acc:Q18864]
WBGene00007254	C01H6.4	316.924	0.714167	0.200133	3.56846	0.000359085	0.0113352	Flavin-containing monooxygenase [Source:UniProtKB/TrEMBL;Acc:Q17585]
WBGene00015385	C03B8.2	26.0233	-1.62018	0.454182	-3.56724	0.000360758	0.0113663
WBGene00001042	dnj-24	682.119	0.75614	0.212026	3.56625	0.000362121	0.0113875	DNaJ domain (Prokaryotic heat shock protein) [Source:UniProtKB/TrEMBL;Acc:Q9TY07]
WBGene00019247	syp-4	1973.47	-1.77155	0.497147	-3.56343	0.000366044	0.011489
WBGene00002274	lec-11	879.458	0.938834	0.263622	3.56129	0.000369034	0.0115391	Galectin [Source:UniProtKB/TrEMBL;Acc:Q94215]
WBGene00020530	T15B12.1	706.314	0.64605	0.181391	3.56165	0.000368533	0.0115391
WBGene00013946	ZK228.3	901.647	1.09937	0.309022	3.55756	0.000374316	0.0116822
WBGene00004117	sin-3	2603.78	-1.81786	0.511406	-3.55463	0.000378517	0.0117911	Paired amphipathic helix protein sin-3 [Source:UniProtKB/Swiss-Prot;Acc:A5JYW9]
WBGene00219770	linc-40	56.1092	-2.28874	0.64398	-3.55405	0.000379348	0.0117947	NA
WBGene00008991	F20G4.2	94.248	-2.55194	0.718364	-3.55243	0.000381686	0.0118246
WBGene00022413	Y102A11A.3	527.852	-1.33524	0.375871	-3.5524	0.000381737	0.0118246
WBGene00001324	eor-1	1629.63	-1.03692	0.292207	-3.54859	0.000387296	0.011968	EOR-1 [Source:UniProtKB/TrEMBL;Acc:G5EDU4]
WBGene00018216	F40A3.1	651.789	0.674972	0.190257	3.54769	0.000388626	0.011968
WBGene00020943	W02D7.8	24.2225	1.42578	0.401904	3.54756	0.000388824	0.011968
WBGene00021671	Y48G1BM.6	60.1802	-1.33697	0.376901	-3.54726	0.000389261	0.011968
WBGene00015050	clec-51	663.383	0.849308	0.2395	3.54618	0.000390865	0.011995	C-type LECtin [Source:UniProtKB/TrEMBL;Acc:Q17450]
WBGene00019748	atg-2	1733.19	-0.77917	0.219822	-3.54455	0.000393278	0.0120467	AuTophaGy (Yeast Atg homolog) [Source:UniProtKB/TrEMBL;Acc:Q21480]
WBGene00008549	din-1	2221.35	-0.804828	0.227125	-3.54354	0.000394788	0.0120605	Daf-12-interacting protein 1 [Source:UniProtKB/Swiss-Prot;Acc:G5EGK6]
WBGene00022441	Y110A2AL.4	358.705	-2.27967	0.643378	-3.54328	0.000395186	0.0120605
WBGene00004147	larp-5	4827.11	-1.5498	0.438187	-3.53686	0.000404919	0.0123347	LARP (RNA binding La related protein) homolog [Source:UniProtKB/TrEMBL;Acc:O44760]
WBGene00001426	fkb-1	7096.68	0.817691	0.231256	3.53587	0.00040643	0.012358	Peptidylprolyl isomerase [Source:UniProtKB/TrEMBL;Acc:Q20107]
WBGene00022124	supr-1	517.027	-1.38299	0.39154	-3.53219	0.000412135	0.0125085	SUPpressor of Rpm-1 [Source:UniProtKB/TrEMBL;Acc:Q95XT1]
WBGene00007860	rilp-1	1356.08	-1.6702	0.472977	-3.53124	0.000413611	0.0125303	RILP (Rab7-Interacting Lysosomal Protein) homolog [Source:UniProtKB/TrEMBL;Acc:G5EDL7]
WBGene00008197	C49C3.7	1210.04	-1.45105	0.411093	-3.52974	0.000415963	0.0125622
WBGene00011660	T09E11.11	67.5156	-1.56156	0.442418	-3.5296	0.000416184	0.0125622
WBGene00000003	aat-2	530.197	0.797119	0.225991	3.52722	0.000419947	0.0126352	Amino Acid Transporter [Source:UniProtKB/TrEMBL;Acc:Q19151]
WBGene00017041	D2007.1	1371.92	1.14429	0.324428	3.52711	0.000420129	0.0126352
WBGene00007921	C34C12.2	1523.74	-1.13367	0.321694	-3.52407	0.000424976	0.0127434
WBGene00019337	K02F6.3	17.2287	-2.05175	0.582241	-3.52389	0.000425267	0.0127434
WBGene00019733	M02E1.1	368.713	-1.30604	0.370891	-3.52136	0.000429331	0.0128419
WBGene00017571	jmjd-3.1	784.075	-0.837683	0.238069	-3.51866	0.000433737	0.012919	Lysine-specific demethylase jmjd-3.1 [Source:UniProtKB/Swiss-Prot;Acc:Q95QK3]
WBGene00018316	F41H10.3	2636.37	-1.19033	0.338276	-3.51881	0.000433494	0.012919
WBGene00018823	F54E2.1	7836.94	0.9063	0.257593	3.51834	0.000434251	0.012919
WBGene00012385	Y5F2A.4	951.733	-1.7859	0.507828	-3.51675	0.000436861	0.0129733
WBGene00018702	F52E4.5	1300.52	0.794169	0.225912	3.51539	0.000439102	0.0130165
WBGene00015203	cdk-11.1	1648.14	-1.32433	0.376806	-3.51464	0.000440358	0.0130303	Putative serine/threonine-protein kinase B0495.2 [Source:UniProtKB/Swiss-Prot;Acc:Q09437]
WBGene00008334	sdz-8	319.792	0.90178	0.256689	3.51313	0.000442862	0.013081	SKN-1 Dependent Zygotic transcript [Source:UniProtKB/TrEMBL;Acc:P90780]
WBGene00006938	wee-1.1	19.5461	-2.03418	0.579185	-3.51215	0.000444497	0.0130982	Membrane-associated tyrosine- and threonine-specific cdc2-inhibitory kinase wee-1.1 [Source:UniProtKB/Swiss-Prot;Acc:Q20085]
WBGene00007315	C04H5.7	2104.59	1.42049	0.404487	3.51183	0.000445025	0.0130982
WBGene00012101	zip-10	1086.96	0.760298	0.216657	3.50923	0.000449413	0.0132038	BZIP transcription factor family [Source:UniProtKB/TrEMBL;Acc:Q22835]
WBGene00010884	M7.8	148.937	0.81599	0.232574	3.50852	0.000450615	0.0132157
WBGene00011722	rbm-22	6729.23	0.622356	0.177501	3.50622	0.000454527	0.0132424
WBGene00012151	VH15N14R.1	122.074	-1.73656	0.495298	-3.5061	0.00045473	0.0132424
WBGene00012212	W02D9.6	1333.66	1.44859	0.413081	3.50679	0.000453552	0.0132424
WBGene00020781	T24H7.2	3803.46	-1.97261	0.562565	-3.50647	0.000454101	0.0132424
WBGene00007023	mdt-27	1249.5	-1.20329	0.343317	-3.5049	0.000456777	0.0132553	MeDiaTor [Source:UniProtKB/TrEMBL;Acc:Q22550]
WBGene00019572	K09E2.3	1698.28	0.901636	0.257241	3.50503	0.000456562	0.0132553
WBGene00000100	ajm-1	1931.7	-0.888989	0.253731	-3.50367	0.000458896	0.0132935	Apical Junction Molecule [Source:UniProtKB/TrEMBL;Acc:A0A1C3NSM8]
WBGene00003367	mix-1	3131.88	-1.13536	0.324153	-3.50253	0.000460859	0.0133271	Mitotic chromosome and X-chromosome-associated protein mix-1 [Source:UniProtKB/Swiss-Prot;Acc:Q09591]
WBGene00012201	W02B12.1	538.96	0.834177	0.238316	3.50029	0.000464749	0.0133694
WBGene00015976	C18E3.9	829.816	-1.4827	0.423582	-3.50038	0.000464591	0.0133694
WBGene00018274	F41C3.8	210.745	0.706128	0.201711	3.5007	0.000464037	0.0133694
WBGene00004191	prx-1	224.015	-0.995729	0.284826	-3.49593	0.00047242	0.0135665	PeRoXisome assembly factor; Peroxin [Source:UniProtKB/TrEMBL;Acc:G5ED99]
WBGene00006971	zak-1	194.608	-1.45673	0.416981	-3.49353	0.000476682	0.0136415	Mammalian ZAK kinase homolog [Source:UniProtKB/TrEMBL;Acc:H2KZW5]
WBGene00020992	W03F8.2	32.4844	-2.10914	0.603652	-3.49397	0.000475887	0.0136415
WBGene00000770	cpb-1	1411.45	-1.44736	0.41459	-3.49106	0.000481099	0.0137218	Cytoplasmic polyadenylation element-binding protein 1 [Source:UniProtKB/Swiss-Prot;Acc:Q03571]
WBGene00019490	K07E3.1	765.865	-1.26127	0.361287	-3.49104	0.000481147	0.0137218
WBGene00009770	F46B6.5	2367.37	-1.64975	0.472661	-3.49035	0.000482384	0.0137334
WBGene00011576	rmh-2	530.751	-1.47268	0.422007	-3.48971	0.000483537	0.0137426	RMi1 (RMI1) Homolog [Source:UniProtKB/TrEMBL;Acc:G5EF82]
WBGene00015194	B0432.13	653.785	-1.71032	0.49019	-3.4891	0.000484653	0.0137507
WBGene00017605	F19F10.9	3321.4	-1.47341	0.422983	-3.48339	0.000495101	0.0139991
WBGene00019912	R06B10.1	39.3406	-2.11419	0.60693	-3.48341	0.000495065	0.0139991
WBGene00021735	Y50D4A.1	1510.77	-1.43645	0.412627	-3.48122	0.000499135	0.0140891
WBGene00012213	W02D9.7	3268.34	1.30199	0.374208	3.47932	0.000502692	0.0141172
WBGene00020148	T01D1.3	479.409	0.862791	0.247959	3.47958	0.000502205	0.0141172
WBGene00021079	W08A12.2	615.376	1.42892	0.410597	3.48011	0.000501204	0.0141172
WBGene00011600	zim-2	529.508	-1.87254	0.538443	-3.4777	0.000505744	0.0141548	Zinc finger In Meiosis [Source:UniProtKB/TrEMBL;Acc:O18067]
WBGene00022211	Y73B3A.9	87.7879	-1.27008	0.365195	-3.47782	0.000505507	0.0141548
WBGene00017258	F08F1.4	521.245	1.23641	0.355697	3.47601	0.000508926	0.0142199
WBGene00008535	F02H6.2	566.809	-2.0361	0.586614	-3.47093	0.000518653	0.0144672
WBGene00012138	T28F4.3	57.8265	-1.7896	0.515718	-3.47011	0.000520242	0.0144871	Protein-tyrosine-phosphatase [Source:UniProtKB/TrEMBL;Acc:Q22852]
WBGene00009362	F33E2.6	12.7244	-2.91901	0.841463	-3.46897	0.000522465	0.0145179
WBGene00009651	F43D2.2	557.999	-1.70951	0.492846	-3.46864	0.000523103	0.0145179
WBGene00015472	C05D9.3	1447.02	0.825365	0.238	3.46793	0.000524491	0.014532	Uncharacterized integrin beta-like protein C05D9.3 [Source:UniProtKB/Swiss-Prot;Acc:Q9GYK2]
WBGene00002105	ins-22	49.5491	1.07861	0.311173	3.46627	0.000527729	0.0145486	Probable insulin-like peptide alpha-type 2 [Source:UniProtKB/Swiss-Prot;Acc:Q21508]
WBGene00009254	capg-1	2615.06	-1.64828	0.475478	-3.46657	0.000527147	0.0145486	Condensin complex subunit capg-1 [Source:UniProtKB/Swiss-Prot;Acc:G5EFJ4]
WBGene00022159	mppa-1	1353.75	0.797027	0.229894	3.46693	0.00052643	0.0145486	Mitochondrial Processing Peptidase Alpha [Source:UniProtKB/TrEMBL;Acc:W6RR41]
WBGene00016115	mdt-26	3819.98	-0.724141	0.209076	-3.46353	0.000533138	0.0146733	MeDiaTor [Source:UniProtKB/TrEMBL;Acc:D7SFJ3]
WBGene00001470	baz-2	1042.32	-1.52341	0.440187	-3.46083	0.000538509	0.0147231	Bromodomain Adjacent to Zinc finger domain, 2A/2B, homolog [Source:UniProtKB/TrEMBL;Acc:Q23590]
WBGene00003922	pas-1	8148.68	0.66478	0.192057	3.46136	0.000537447	0.0147231	Proteasome subunit alpha type-6 [Source:UniProtKB/Swiss-Prot;Acc:O17586]
WBGene00006874	vab-8	616.394	-1.48861	0.429995	-3.46193	0.000536322	0.0147231	Kinesin-like protein vab-8 [Source:UniProtKB/Swiss-Prot;Acc:Q21441]
WBGene00010295	fbxa-193	135.06	-1.38064	0.398902	-3.46111	0.000537946	0.0147231
WBGene00002696	let-504	4830.54	-1.46415	0.423323	-3.4587	0.000542793	0.0148157
WBGene00010901	M28.10	6804.5	0.83923	0.242741	3.45731	0.000545606	0.014868
WBGene00019647	K11D12.7	1446.74	0.751782	0.217482	3.45676	0.000546718	0.0148738
WBGene00006826	unc-97	2355.73	0.460853	0.133444	3.45354	0.000553277	0.0150038	LIM domain-containing protein unc-97 [Source:UniProtKB/Swiss-Prot;Acc:P50464]
WBGene00009323	best-13	674.681	0.758291	0.21957	3.45352	0.000553312	0.0150038	Bestrophin homolog 13 [Source:UniProtKB/Swiss-Prot;Acc:O45435]
WBGene00001617	glr-6	159.469	-0.889167	0.257578	-3.45203	0.000556386	0.0150379	GLutamate Receptor family (AMPA) [Source:UniProtKB/TrEMBL;Acc:Q8MXV7]
WBGene00008666	F10G8.8	517.148	-0.923886	0.267634	-3.45205	0.000556345	0.0150379
WBGene00019795	M151.3	126.338	-1.8203	0.527912	-3.44811	0.000564518	0.0152328
WBGene00014516	hpo-42	954.027	-1.1594	0.336372	-3.44678	0.000567316	0.0152834
WBGene00007761	rad-26	2092.61	-1.14492	0.332237	-3.44611	0.000568727	0.0152964
WBGene00004039	plc-4	1053.44	-0.911463	0.264583	-3.4449	0.000571263	0.0153148	Phosphoinositide phospholipase C [Source:UniProtKB/TrEMBL;Acc:Q21754]
WBGene00014087	ZK809.5	1403.92	-1.61111	0.467664	-3.44501	0.000571039	0.0153148
WBGene00000283	cah-5	871.523	0.80369	0.23334	3.44428	0.000572578	0.0153253	Putative carbonic anhydrase 5 [Source:UniProtKB/Swiss-Prot;Acc:Q10462]
WBGene00017142	EEED8.14	469.604	-1.86661	0.542131	-3.44309	0.000575117	0.0153684
WBGene00014053	ZK669.3	325.804	0.801544	0.232854	3.44226	0.000576885	0.0153907	GILT-like protein ZK669.3 [Source:UniProtKB/Swiss-Prot;Acc:Q23570]
WBGene00012426	Y11D7A.1	19.9451	-1.8275	0.531117	-3.44086	0.000579878	0.0154457
WBGene00021644	Y47G6A.18	2852.14	0.730297	0.212281	3.44023	0.000581218	0.0154565
WBGene00016354	rig-6	665.191	-1.10902	0.322488	-3.43895	0.000583981	0.015505	Contactin rig-6 [Source:UniProtKB/Swiss-Prot;Acc:H2KZ60]
WBGene00007087	B0001.2	1829.97	-1.5798	0.459859	-3.4354	0.000591688	0.0156793
WBGene00008040	ttr-5	1252.47	0.964045	0.280649	3.43505	0.000592439	0.0156793	Transthyretin-like protein 5 [Source:UniProtKB/Swiss-Prot;Acc:Q03575]
WBGene00010844	prp-3	2238.37	-1.47916	0.430716	-3.43419	0.000594324	0.015704	Yeast PRP (Splicing factor) related [Source:UniProtKB/TrEMBL;Acc:Q21486]
WBGene00000383	cdc-14	4361.69	-1.23048	0.358485	-3.43244	0.000598183	0.0157782	Cell Division Cycle related [Source:UniProtKB/TrEMBL;Acc:A0A0K3ATW0]
WBGene00020821	jhdm-1	3176.88	-1.23028	0.358468	-3.43205	0.000599038	0.0157782	JmjC domain-containing histone demethylation protein 1 [Source:UniProtKB/Swiss-Prot;Acc:Q95Q98]
WBGene00009514	F37H8.5	5701.52	0.873387	0.254711	3.42893	0.000605958	0.0159351	GILT-like protein F37H8.5 [Source:UniProtKB/Swiss-Prot;Acc:O17861]
WBGene00016664	C45E5.1	352.413	0.849073	0.247729	3.42743	0.00060933	0.0159983
WBGene00006732	uev-3	428.214	-1.5122	0.44132	-3.42655	0.00061131	0.0160249	Ubiquitin-conjugating enzyme E2 variant 3 [Source:UniProtKB/Swiss-Prot;Acc:P91853]
WBGene00017971	F32A5.8	754.516	0.754892	0.220352	3.42584	0.000612891	0.0160409
WBGene00015378	C03B1.7	235.809	-1.33047	0.388519	-3.42448	0.000615988	0.0160965
WBGene00009846	F48F5.2	63.7557	-1.90875	0.557596	-3.42317	0.000618951	0.0161484
WBGene00003941	pbo-1	1275.52	0.728842	0.212958	3.42247	0.000620542	0.0161533
WBGene00012498	Y24F12A.3	93.1236	-1.55935	0.455709	-3.42181	0.000622068	0.0161533
WBGene00019962	cysl-3	1031.05	0.910348	0.266022	3.42208	0.00062144	0.0161533	Cysteine synthase 3 [Source:UniProtKB/Swiss-Prot;Acc:O01592]
WBGene00013078	ttr-25	1638.69	1.07545	0.314561	3.4189	0.000628739	0.0163009	TransThyretin-Related family domain [Source:UniProtKB/TrEMBL;Acc:F3Y5P3]
WBGene00021649	Y47G6A.25	791.531	-1.17971	0.345189	-3.41756	0.000631846	0.0163558
WBGene00010231	F58B3.4	2671.55	-1.45276	0.425183	-3.41679	0.00063363	0.0163606
WBGene00016269	C30G4.4	705.638	0.602206	0.176257	3.41663	0.000634008	0.0163606
WBGene00017985	neg-1	1552.16	-1.10294	0.323199	-3.41256	0.000643562	0.0165337	Negative Effect on Gut development [Source:UniProtKB/TrEMBL;Acc:A0A168H505]
WBGene00018199	F39E9.7	39.8841	-1.33846	0.392129	-3.41332	0.000641772	0.0165337
WBGene00019229	ipla-5	48.7743	-2.22103	0.650852	-3.41249	0.000643714	0.0165337	Intracelllar PhosphoLipase A family [Source:UniProtKB/TrEMBL;Acc:Q9N5L3]
WBGene00022883	ZK1248.15	876.421	-1.76004	0.516407	-3.40825	0.000653815	0.016767
WBGene00014113	hpo-40	1669.02	-1.28336	0.376612	-3.40763	0.000655295	0.0167686
WBGene00018307	dyla-1	24.6583	-1.84088	0.540263	-3.40738	0.000655901	0.0167686	DYnein Light chain, Axonemal p28 type [Source:UniProtKB/TrEMBL;Acc:Q95YA5]
WBGene00001514	xnd-1	3330.56	-1.27056	0.373059	-3.40579	0.000659719	0.0167883	X chromosome NonDisjunction factor [Source:UniProtKB/TrEMBL;Acc:O45134]
WBGene00008214	gem-1	570.898	0.507502	0.148997	3.40614	0.000658895	0.0167883	Gon-2 Extragenic Modifier [Source:UniProtKB/TrEMBL;Acc:Q18712]
WBGene00019122	F59E12.6	561.128	-1.19759	0.351574	-3.40636	0.00065836	0.0167883
WBGene00012692	Y39B6A.33	2457.91	-1.16311	0.341599	-3.4049	0.000661893	0.0168166
WBGene00019249	H28G03.1	2152.21	-0.751425	0.220715	-3.4045	0.000662863	0.0168166
WBGene00003522	nas-3	262.452	1.05651	0.310712	3.40027	0.000673191	0.0170525	Zinc metalloproteinase nas-3 [Source:UniProtKB/Swiss-Prot;Acc:Q21252]
WBGene00021658	Y48G1A.2	1201.51	-1.27556	0.375185	-3.3998	0.000674346	0.0170556
WBGene00021539	Y42H9AR.4	1601.32	-1.60948	0.473534	-3.39887	0.000676659	0.017088
WBGene00009697	F44F1.5	162.552	-1.80603	0.531444	-3.39834	0.000677962	0.0170948
WBGene00009637	nspc-13	425.59	0.958489	0.282229	3.39614	0.000683442	0.0171806	Nematode Specific Peptide family, group C [Source:UniProtKB/TrEMBL;Acc:G5EF55]
WBGene00014213	ZK1073.1	1904.94	0.77382	0.227842	3.39631	0.000683012	0.0171806
WBGene00018117	nlp-47	483.922	0.826854	0.243713	3.39274	0.000691979	0.0173688	Neuropeptide-Like Protein [Source:UniProtKB/TrEMBL;Acc:O76722]
WBGene00008082	com-1	1019.15	-1.25854	0.371056	-3.39178	0.000694394	0.017403	Completion Of Meiotic recombination (Budding yeast Com) related [Source:UniProtKB/TrEMBL;Acc:Q18606]
WBGene00020556	pamn-1	905.674	0.515821	0.15211	3.3911	0.00069613	0.0174201	Probable peptidyl-glycine alpha-amidating monooxygenase pamn-1 Probable peptidylglycine alpha-hydroxylating monooxygenase Probable peptidyl-alpha-hydroxyglycine alpha-amidating lyase [Source:UniProtKB/Swiss-Prot;Acc:P83388]
WBGene00008710	F11E6.7	3513.89	-1.42109	0.41918	-3.39018	0.000698466	0.017452
WBGene00011479	T05E11.2	106.161	0.859146	0.253453	3.38977	0.000699516	0.017452
WBGene00021975	Y58A7A.1	535.099	0.746031	0.22013	3.38904	0.000701378	0.0174721
WBGene00019467	K07B1.7	626.674	-1.47711	0.436091	-3.38716	0.000706209	0.017566
WBGene00011291	R102.4	1796.32	0.620417	0.183267	3.38532	0.000710955	0.0176452
WBGene00045252	Y62H9A.15	158.726	1.14844	0.339264	3.3851	0.000711527	0.0176452
WBGene00164986	Y48A6C.6	9.0475	-2.73646	0.809555	-3.3802	0.00072432	0.0179356
WBGene00012130	slc-17.4	529.975	0.597669	0.176854	3.37944	0.000726334	0.0179586	SLC (SoLute Carrier) homolog [Source:UniProtKB/TrEMBL;Acc:Q8I4F5]
WBGene00018764	F53F10.2	9060.32	0.751756	0.222619	3.37688	0.000733143	0.0180999
WBGene00010585	K05C4.9	201.338	-1.28063	0.379518	-3.37436	0.000739888	0.0182392
WBGene00001233	eif-3.K	4975.78	0.804633	0.238724	3.37055	0.000750174	0.0184189	Eukaryotic translation initiation factor 3 subunit K [Source:UniProtKB/Swiss-Prot;Acc:Q9XUP3]
WBGene00001997	hpr-9	394.501	-1.42865	0.423878	-3.37043	0.000750519	0.0184189	Homolog of S. Pombe Rad [Source:UniProtKB/TrEMBL;Acc:Q95Q27]
WBGene00015746	C13F10.7	4859.65	-0.926134	0.274771	-3.37057	0.000750128	0.0184189
WBGene00004031	pis-1	1812.13	-1.2174	0.361451	-3.36809	0.000756898	0.0184394	PIS (Pax-2, IA-1/6, Smad-2 interacting protein) homolog [Source:UniProtKB/TrEMBL;Acc:Q9U370]
WBGene00013976	hizr-1	149.95	0.917412	0.27231	3.36899	0.000754431	0.0184394	High zinc activated nuclear receptor protein [Source:UniProtKB/Swiss-Prot;Acc:G5ED47]
WBGene00017138	EEED8.10	1780.38	-0.853152	0.253287	-3.36832	0.000756284	0.0184394	Putative RNA-binding protein EEED8.10 [Source:UniProtKB/Swiss-Prot;Acc:Q09299]
WBGene00018757	tag-304	1159.08	0.552443	0.164043	3.36768	0.000758043	0.0184394
WBGene00043982	B0403.6	158.752	0.947342	0.281277	3.368	0.000757157	0.0184394
WBGene00194906	Y53C12A.11	162.423	-1.31593	0.390589	-3.36909	0.000754161	0.0184394
WBGene00007137	B0285.4	3620.16	0.713342	0.211924	3.36602	0.000762603	0.0185231	Probable leucine carboxyl methyltransferase 1 [Source:UniProtKB/Swiss-Prot;Acc:P46554]
WBGene00013360	Y60A3A.9	3970.63	0.499221	0.148369	3.36472	0.000766219	0.0185836
WBGene00009885	F49E2.1	249.474	-0.954588	0.283875	-3.36271	0.000771822	0.0186921	Molybdenum cofactor biosynthesis protein 1 GTP 3',8-cyclase Cyclic pyranopterin monophosphate synthase [Source:UniProtKB/Swiss-Prot;Acc:Q20624]
WBGene00003783	nos-1	1244.83	-0.997663	0.296725	-3.36225	0.000773099	0.0186957	NanOS related [Source:UniProtKB/TrEMBL;Acc:Q09597]
WBGene00015557	C06G4.1	1074.2	-1.74252	0.518418	-3.36123	0.000775959	0.0187374	KH domain-containing protein C06G4.1 [Source:UniProtKB/Swiss-Prot;Acc:P34307]
WBGene00045509	T07D10.8	268.437	-1.08822	0.323835	-3.36041	0.00077827	0.0187658
WBGene00016397	maph-9	35.0748	-1.92875	0.574156	-3.35927	0.000781475	0.0188157
WBGene00015885	fbxa-65	372.704	0.703781	0.209562	3.35835	0.000784102	0.0188241	F-box A protein [Source:UniProtKB/TrEMBL;Acc:O45159]
WBGene00018785	F54A3.6	950.008	-0.799858	0.238153	-3.35859	0.000783425	0.0188241
WBGene00003923	pas-2	10286.9	0.886974	0.264156	3.35776	0.000785766	0.0188279	Proteasome subunit alpha type-2 [Source:UniProtKB/Swiss-Prot;Acc:Q27488]
WBGene00009483	F36G3.2	591.614	1.07726	0.320917	3.35683	0.000788416	0.0188279
WBGene00012689	Y39B6A.30	30.2265	-2.83519	0.844638	-3.35669	0.000788811	0.0188279
WBGene00018317	F41H10.4	939.569	-1.25986	0.375299	-3.35695	0.000788087	0.0188279
WBGene00000151	apn-1	1510.85	-1.55392	0.463047	-3.35587	0.000791171	0.0188515	DNA-(apurinic or apyrimidinic site) lyase [Source:UniProtKB/Swiss-Prot;Acc:Q10002]
WBGene00007586	ril-2	3414.8	-1.33875	0.398983	-3.35541	0.000792486	0.0188515	RNAi-Induced Longevity [Source:UniProtKB/TrEMBL;Acc:Q17973]
WBGene00009674	nucb-1	1093.86	-1.00184	0.298598	-3.35515	0.000793221	0.0188515	NUCleoBindin homolog [Source:UniProtKB/TrEMBL;Acc:Q20384]
WBGene00002062	ife-4	754.445	0.620809	0.185181	3.35244	0.000801024	0.0189824	Eukaryotic translation initiation factor 4E-4 [Source:UniProtKB/Swiss-Prot;Acc:Q22888]
WBGene00003883	osm-1	246.259	-1.26236	0.376524	-3.35267	0.000800358	0.0189824	Intraflagellar transport protein osm-1 [Source:UniProtKB/Swiss-Prot;Acc:Q22830]
WBGene00016120	C25H3.11	25.7854	-1.80354	0.538286	-3.35052	0.000806606	0.0190874
WBGene00010958	ndfl-4	226.658	-2.53356	0.756483	-3.34913	0.000810665	0.0191543	NADH-ubiquinone oxidoreductase chain 4L [Source:UniProtKB/Swiss-Prot;Acc:P24886]
WBGene00017133	EEED8.2	793.724	-1.42084	0.424297	-3.34869	0.000811956	0.0191543
WBGene00020631	T20F7.3	50.2169	1.1108	0.331743	3.34836	0.000812908	0.0191543	Kinase [Source:UniProtKB/TrEMBL;Acc:O02167]
WBGene00000953	del-2	46.1951	-1.49234	0.445781	-3.3477	0.00081484	0.0191725	DEgenerin Like [Source:UniProtKB/TrEMBL;Acc:G5ECD8]
WBGene00009448	zfp-2	1286.1	-1.6561	0.494812	-3.34693	0.00081713	0.0191895	Zinc Finger Protein [Source:UniProtKB/TrEMBL;Acc:Q20082]
WBGene00022166	Y71H2AM.1	2006.36	0.452284	0.135144	3.34667	0.000817881	0.0191895	Probable tRNA N6-adenosine threonylcarbamoyltransferase [Source:UniProtKB/TrEMBL;Acc:Q9BL28]
WBGene00007196	B0513.4	7147.11	1.12145	0.335276	3.34486	0.000823238	0.0192243
WBGene00009054	F22D6.9	404.934	-0.784056	0.234425	-3.3446	0.000824016	0.0192243	Serine/threonine-protein phosphatase [Source:UniProtKB/TrEMBL;Acc:Q27494]
WBGene00014165	puf-12	5048.62	-1.15803	0.346165	-3.34533	0.00082185	0.0192243	Pumilio domain-containing protein 12 [Source:UniProtKB/Swiss-Prot;Acc:Q09622]
WBGene00019624	K10C9.3	2643.84	0.78913	0.235931	3.34475	0.000823561	0.0192243
WBGene00000535	cpi-1	14772.2	1.05729	0.316221	3.34353	0.000827205	0.0192715	Cystatin [Source:UniProtKB/TrEMBL;Acc:G5EDZ9]
WBGene00014114	tftc-3	1857.18	-1.08879	0.325802	-3.34188	0.000832124	0.0193589	Transcription Factor ThreeC subunit (GTF3C homolog) [Source:UniProtKB/TrEMBL;Acc:Q95PV7]
WBGene00010613	K07A1.6	2359.87	1.30431	0.390351	3.34138	0.00083363	0.0193667
WBGene00003477	mtm-5	645.124	-0.866126	0.259336	-3.33978	0.000838437	0.0193678	Myotubularin-related protein 5 [Source:UniProtKB/Swiss-Prot;Acc:Q9TXP3]
WBGene00010642	mks-6	28.8541	-1.97704	0.592015	-3.33952	0.000839234	0.0193678	MecKel-Gruber Syndrome (MKS) homolog [Source:UniProtKB/TrEMBL;Acc:Q21303]
WBGene00013985	sec-16	3093.54	-1.04193	0.312019	-3.33932	0.000839848	0.0193678
WBGene00019794	M151.2	10.8483	-2.38996	0.715825	-3.33874	0.00084158	0.0193678
WBGene00020964	polq-1	931.482	-1.79904	0.538733	-3.3394	0.000839588	0.0193678	DNA polymerase theta [Source:UniProtKB/Swiss-Prot;Acc:A0FLQ6]
WBGene00022856	cth-2	5093.45	0.774511	0.231983	3.33865	0.000841874	0.0193678	Putative cystathionine gamma-lyase 2 [Source:UniProtKB/Swiss-Prot;Acc:P55216]
WBGene00195255	H16D19.7	10.2583	-2.21234	0.662581	-3.33897	0.000840891	0.0193678
WBGene00219278	R09A8.9	14.3037	-2.16621	0.649055	-3.33749	0.000845385	0.0194215
WBGene00007788	C28A5.1	637.538	-1.52653	0.457446	-3.33706	0.000846685	0.0194244
WBGene00008862	F15D4.5	1137.04	-1.79694	0.539084	-3.33333	0.000858146	0.0196601
WBGene00002783	let-607	3437.49	-1.16336	0.349096	-3.3325	0.000860692	0.0196633
WBGene00003720	nhr-130	219.622	0.730401	0.219225	3.33174	0.000863039	0.0196633	Nuclear hormone receptor family member nhr-130 [Source:UniProtKB/Swiss-Prot;Acc:O16963]
WBGene00011424	dhs-31	97.7521	0.833667	0.250145	3.33274	0.000859956	0.0196633	DeHydrogenases, Short chain [Source:UniProtKB/TrEMBL;Acc:D3KFT5]
WBGene00043053	F47H4.12	22.1818	-1.9468	0.584269	-3.33202	0.000862184	0.0196633
WBGene00019244	H25P19.1	1007.39	-0.613042	0.184052	-3.33081	0.000865945	0.0197023
WBGene00004030	pin-2	271.372	0.64743	0.194475	3.32912	0.000871211	0.0197949	LIM domain-containing protein pin-2 [Source:UniProtKB/Swiss-Prot;Acc:Q19157]
WBGene00015955	C18B2.4	2180.11	0.745266	0.224005	3.327	0.000877856	0.0199185
WBGene00019831	R02F2.1	20141.1	-0.998873	0.300527	-3.32373	0.000888209	0.0201258
WBGene00012211	ssp-37	476.525	1.17737	0.354354	3.32258	0.000891891	0.0201266	Sperm Specific family, class P [Source:UniProtKB/TrEMBL;Acc:Q9XVH1]
WBGene00020886	ttr-6	4174.76	1.03103	0.310304	3.32263	0.000891716	0.0201266	TransThyretin-Related family domain [Source:UniProtKB/TrEMBL;Acc:O17345]
WBGene00235333	C24H12.18	32.4185	-1.74692	0.525738	-3.3228	0.0008912	0.0201266
WBGene00194650	C36A4.14	198.541	-1.24467	0.37467	-3.32206	0.000893569	0.020137
WBGene00022410	Y97E10C.1	920.146	-1.18498	0.35683	-3.32086	0.0008974	0.0201958
WBGene00003682	nhr-92	89.9075	0.800681	0.241232	3.31913	0.000902969	0.0202935	Nuclear Hormone Receptor family [Source:UniProtKB/TrEMBL;Acc:Q95Y07]
WBGene00011441	T04F8.2	1313.68	0.578117	0.174282	3.31713	0.000909476	0.020412
WBGene00007165	B0391.10	208.692	-1.5965	0.481363	-3.31662	0.000911135	0.0204164
WBGene00017931	picc-1	2389.92	-1.65475	0.498973	-3.31631	0.000912143	0.0204164	PAC-1 interacting and coiled-coil domain-containing protein 1 [Source:UniProtKB/Swiss-Prot;Acc:H2KYP0]
WBGene00004984	spn-4	14466.8	-1.37404	0.414536	-3.31465	0.00091759	0.0204829	PIP-1 [Source:UniProtKB/TrEMBL;Acc:G5EF02]
WBGene00195189	ZC449.8	108.865	1.1906	0.359156	3.315	0.000916443	0.0204829
WBGene00003821	nst-1	5415.54	-1.60212	0.483439	-3.314	0.000919718	0.0205028	Guanine nucleotide-binding protein-like 3 homolog [Source:UniProtKB/Swiss-Prot;Acc:Q21086]
WBGene00013077	ttr-24	3535.64	0.964862	0.291309	3.31216	0.000925787	0.0205826	TransThyretin-Related family domain [Source:UniProtKB/TrEMBL;Acc:H2KMI9]
WBGene00021560	coh-4	674.864	-0.717483	0.216617	-3.31222	0.000925577	0.0205826	COHesin family [Source:UniProtKB/TrEMBL;Acc:Q95XJ4]
WBGene00013303	Y57G11C.5	30.9503	-1.52534	0.46067	-3.31113	0.000929192	0.0206018
WBGene00015639	C09E7.5	8.9758	-2.13034	0.643457	-3.31077	0.000930389	0.0206018
WBGene00021327	mrpl-38	2922.85	0.552341	0.166825	3.3109	0.000929959	0.0206018	Mitochondrial Ribosomal Protein, Large [Source:UniProtKB/TrEMBL;Acc:Q9BL86]
WBGene00019070	F58H7.5	100.605	-1.8458	0.557942	-3.30824	0.000938854	0.0207615
WBGene00016292	tbc-7	729.698	0.650223	0.196724	3.30525	0.000948918	0.020956	TBC (Tre-2/Bub2/Cdc16) domain family [Source:UniProtKB/TrEMBL;Acc:Q8MQB0]
WBGene00002223	klp-12	2155.33	-1.28174	0.387968	-3.30374	0.000954045	0.0210224	Kinesin-Like Protein [Source:UniProtKB/TrEMBL;Acc:B3GWD7]
WBGene00019087	F59A6.5	2377.53	-1.47898	0.447685	-3.30362	0.000954467	0.0210224
WBGene00011597	zim-1	956.002	-1.44453	0.437603	-3.301	0.000963398	0.0211909	Zinc finger In Meiosis [Source:UniProtKB/TrEMBL;Acc:O18064]
WBGene00001086	dpy-27	1557.49	-0.874826	0.265167	-3.29916	0.000969762	0.0212771	Chromosome condensation protein dpy-27 [Source:UniProtKB/Swiss-Prot;Acc:P48996]
WBGene00017216	F07F6.2	20.5015	-1.60018	0.485032	-3.29912	0.000969891	0.0212771
WBGene00013855	ZC116.3	80.1839	-1.18139	0.358206	-3.29806	0.000973561	0.0213294	Probable cubilin [Source:UniProtKB/Swiss-Prot;Acc:Q20911]
WBGene00015850	C16C8.12	330.1	-1.929	0.585035	-3.29724	0.000976392	0.0213631
WBGene00010617	K07A1.13	388.064	0.915206	0.277603	3.29682	0.000977879	0.0213674
WBGene00000424	ced-10	3173.06	0.546013	0.165678	3.29563	0.000982016	0.0214012	Ras-related protein ced-10 [Source:UniProtKB/Swiss-Prot;Acc:Q03206]
WBGene00022830	ZK973.1	3689.45	-1.77546	0.538701	-3.29582	0.000981339	0.0214012
WBGene00001029	dnj-11	5037.89	-1.40226	0.425613	-3.29468	0.000985352	0.0214359	DNaJ domain (Prokaryotic heat shock protein) [Source:UniProtKB/TrEMBL;Acc:Q94216]
WBGene00010649	K08C7.7	167.806	0.649007	0.197001	3.29443	0.000986201	0.0214359
WBGene00020896	T28D9.4	1639.88	-0.855518	0.259774	-3.29332	0.000990115	0.0214928
WBGene00007418	C07E3.8	10.8208	-2.44524	0.742746	-3.29216	0.000994218	0.0215038
WBGene00018959	F56D1.1	1046.3	-1.59073	0.48315	-3.29242	0.000993276	0.0215038	Putative zinc finger protein F56D1.1 [Source:UniProtKB/Swiss-Prot;Acc:Q10127]
WBGene00020777	T24E12.10	85.9683	-1.15933	0.352158	-3.29207	0.000994523	0.0215038
WBGene00016457	C35E7.5	3503.82	-1.67383	0.508639	-3.29081	0.000998998	0.0215724
WBGene00000537	clk-2	933.011	-1.20186	0.365288	-3.29016	0.00100129	0.0215792	Telomere length regulation protein clk-2 [Source:UniProtKB/Swiss-Prot;Acc:Q95YE9]
WBGene00020449	fbxa-54	296.895	0.78051	0.237265	3.28962	0.00100323	0.0215792	F-box A protein [Source:UniProtKB/TrEMBL;Acc:Q9TZ21]
WBGene00043051	C29E4.13	654.891	-1.04978	0.319098	-3.28985	0.00100241	0.0215792
WBGene00014252	ZK1320.2	7295.65	0.991543	0.301493	3.28877	0.00100625	0.0216161
WBGene00022798	fahd-1	759.366	0.550064	0.167303	3.28782	0.00100965	0.021661	Fumarylacetoacetate hydrolase domain-containing protein 1 [Source:UniProtKB/Swiss-Prot;Acc:P34673]
WBGene00007786	rmd-2	9255.25	0.757096	0.230373	3.28639	0.00101479	0.021743	Regulator of Microtubule Dynamics [Source:UniProtKB/TrEMBL;Acc:Q8MQB5]
WBGene00001653	gon-4	1603.47	-1.65532	0.503887	-3.28509	0.00101948	0.0218068
WBGene00009946	ogr-2	595.831	-1.34096	0.408226	-3.28484	0.0010204	0.0218068
WBGene00011087	R07B7.2	1301.26	-1.31923	0.401706	-3.28407	0.00102318	0.021838
WBGene00004804	skn-1	4436.73	-0.990561	0.302007	-3.27993	0.00103834	0.022133	SKiNhead [Source:UniProtKB/TrEMBL;Acc:V6CLA3]
WBGene00016944	uri-1	1418.66	-1.85612	0.566114	-3.27871	0.00104282	0.0221998	URI (Unconventional prefoldin RPB5 Interactor) homolog [Source:UniProtKB/TrEMBL;Acc:Q966M4]
WBGene00017745	F23F1.4	886.447	0.751384	0.229216	3.27805	0.00104525	0.022223
WBGene00010554	mlc-6	74.6673	0.96677	0.295107	3.276	0.0010529	0.0223569	Myosin Light Chain [Source:UniProtKB/TrEMBL;Acc:Q21201]
WBGene00010434	H40L08.3	38.8339	-1.7105	0.522491	-3.27375	0.00106132	0.0225068
WBGene00045291	F23D12.10	80.9587	-1.78693	0.546235	-3.27135	0.00107035	0.0226692
WBGene00009069	F23A7.4	534.93	-1.98937	0.608376	-3.26998	0.00107556	0.0227505
WBGene00007053	chd-7	2356.09	-0.698789	0.213997	-3.26542	0.00109302	0.0229941	Chromodomain and Helicase Domain protein [Source:UniProtKB/TrEMBL;Acc:O61845]
WBGene00007495	C09G9.5	84.9005	1.12906	0.345687	3.26612	0.00109032	0.0229941
WBGene00010972	R01H10.4	178.362	0.684953	0.209795	3.26487	0.00109514	0.0229941
WBGene00013869	mlck-1	339.178	-1.35458	0.414779	-3.26579	0.0010916	0.0229941	Myosin Light Chain Kinase related [Source:UniProtKB/TrEMBL;Acc:Q23260]
WBGene00015236	B0511.11	87.4508	-1.2693	0.388582	-3.26649	0.0010889	0.0229941
WBGene00077457	Y39B6A.49	143.155	-1.20643	0.369527	-3.2648	0.00109542	0.0229941
WBGene00010498	K02B12.5	762.159	-1.50386	0.461312	-3.25997	0.00111425	0.0233545
WBGene00020572	rund-1	126.969	-1.29058	0.395922	-3.25967	0.00111542	0.0233545	RUN Domain containing protein; RUND-1 [Source:UniProtKB/TrEMBL;Acc:Q22585]
WBGene00000840	cul-5	1880.07	-0.96625	0.29654	-3.25842	0.00112035	0.023407	Cullin-5 [Source:UniProtKB/Swiss-Prot;Acc:Q23639]
WBGene00009777	F46C3.2	118.521	0.936002	0.287297	3.25796	0.00112216	0.023407
WBGene00014011	ZK632.2	1770.05	-1.5455	0.474366	-3.25804	0.00112185	0.023407
WBGene00019509	K07H8.9	883.322	-1.05025	0.322438	-3.25721	0.00112513	0.0234392
WBGene00006949	wrt-3	223.359	0.829849	0.254808	3.25677	0.00112689	0.0234464	Warthog protein 3 [Source:UniProtKB/Swiss-Prot;Acc:Q20170]
WBGene00008863	F15D4.6	39.3851	-1.52469	0.468232	-3.25627	0.00112887	0.023458
WBGene00255595	D1046.18	22.9339	-1.53779	0.472502	-3.25457	0.00113563	0.0235689
WBGene00006443	pak-2	1612.44	-1.31444	0.404316	-3.25101	0.00114994	0.0238062	Serine/threonine-protein kinase pak-2 [Source:UniProtKB/Swiss-Prot;Acc:G5EFU0]
WBGene00012176	W01C9.2	71.6819	-2.37989	0.732023	-3.25111	0.00114955	0.0238062
WBGene00014615	Y116F11A.4	20.2632	-1.48531	0.45708	-3.24955	0.00115588	0.0238992
WBGene00086566	C08H9.16	862.961	-1.55768	0.479515	-3.24844	0.00116038	0.0239624
WBGene00012526	Y32B12C.3	9.11313	-2.55559	0.786895	-3.24769	0.00116346	0.0239959
WBGene00016318	C32D5.11	2366.9	-1.26116	0.38857	-3.24563	0.0011719	0.02414
WBGene00019203	ttr-47	2561.56	0.83524	0.257483	3.24387	0.00117919	0.0242599	TransThyretin-Related family domain [Source:UniProtKB/TrEMBL;Acc:O61977]
WBGene00001499	fsn-1	4139.33	-0.918868	0.283334	-3.24305	0.00118256	0.024299	F-box/SPRY domain-containing protein 1 [Source:UniProtKB/Swiss-Prot;Acc:Q18223]
WBGene00008745	F13E6.1	5771.51	0.586496	0.1811	3.23852	0.00120152	0.0246581
WBGene00023489	F42A10.9	401.835	0.7215	0.223081	3.23426	0.0012196	0.0249981
WBGene00006410	nck-1	2732.29	0.474956	0.146893	3.23336	0.00122344	0.0250187	NCK (Non-Catalytic region of tyrosine Kinase) adaptor protein family [Source:UniProtKB/TrEMBL;Acc:Q95PW9]
WBGene00195017	R144.15	23.0312	-4.706	1.45548	-3.23329	0.00122372	0.0250187
WBGene00219452	F21D9.11	92.9138	-1.1141	0.344606	-3.23296	0.00122515	0.0250187
WBGene00006237	str-204	27.2798	-1.41028	0.436751	-3.22904	0.00124208	0.0253085	Seven TM Receptor [Source:UniProtKB/TrEMBL;Acc:O16921]
WBGene00006432	tag-53	2800.91	0.503851	0.156058	3.22861	0.00124393	0.0253085	Putative protein tag-53 [Source:UniProtKB/Swiss-Prot;Acc:Q19981]
WBGene00015513	snpc-1.1	1511.45	-1.58321	0.490363	-3.22865	0.00124377	0.0253085	SNAPc (Small Nuclear RNA Activating Complex) homolog [Source:UniProtKB/TrEMBL;Acc:Q17694]
WBGene00007459	C08F11.12	876.617	1.07181	0.332047	3.22788	0.00124712	0.0253424	UPF0375 protein C08F11.12 [Source:UniProtKB/Swiss-Prot;Acc:Q9U3R0]
WBGene00001045	dnj-27	2054.17	0.630791	0.195498	3.22658	0.00125277	0.0254183	DNaJ domain (Prokaryotic heat shock protein) [Source:UniProtKB/TrEMBL;Acc:Q25AR9]
WBGene00013079	ttr-26	2022.71	0.919668	0.285052	3.22632	0.00125393	0.0254183	TransThyretin-Related family domain [Source:UniProtKB/TrEMBL;Acc:Q9XXR5]
WBGene00015091	B0261.1	2509.29	-1.24767	0.386855	-3.22516	0.00125903	0.0254904
WBGene00006492	let-391	1036.92	-1.32095	0.409743	-3.22386	0.00126475	0.0255749
WBGene00020496	spat-3	1487.11	-0.980227	0.304095	-3.22343	0.00126667	0.0255824	Suppressor of PAr-Two defect [Source:UniProtKB/TrEMBL;Acc:Q22463]
WBGene00023355	W02F12.1	26.4893	-1.42065	0.440933	-3.22191	0.00127337	0.0256864
WBGene00022794	snu-23	1563.43	-1.04219	0.323521	-3.2214	0.00127567	0.0257014	Putative zinc finger matrin-type protein snu-23 [Source:UniProtKB/Swiss-Prot;Acc:P34670]
WBGene00011318	cdt-2	1700.88	-1.62766	0.505667	-3.21884	0.00128709	0.0258632	CDT (S. pombe CDC10 Dependent Transcript) homolog [Source:UniProtKB/TrEMBL;Acc:Q22059]
WBGene00018769	mnat-1	3599.28	0.622575	0.193418	3.21881	0.00128723	0.0258632	MNAT (Menage a trois) TFIIH subunit [Source:UniProtKB/TrEMBL;Acc:O17245]
WBGene00044220	Y102A5C.35	10.6635	-2.08554	0.647975	-3.21855	0.00128839	0.0258632
WBGene00020297	nog-1	13651	-0.752452	0.233832	-3.21792	0.00129126	0.0258893	Nucleolar GTP-binding protein 1 [Source:UniProtKB/Swiss-Prot;Acc:O44411]
WBGene00003034	lin-49	1600.02	-1.664	0.517165	-3.21754	0.00129294	0.0258918
WBGene00011741	T12G3.6	2068.38	-1.37672	0.428179	-3.21528	0.00130317	0.0260463
WBGene00013870	ZC373.5	517.609	0.632059	0.196588	3.21514	0.00130381	0.0260463	Probable methylthioribulose-1-phosphate dehydratase [Source:UniProtKB/Swiss-Prot;Acc:Q23261]
WBGene00007132	pals-27	66.9475	-1.66868	0.519163	-3.21418	0.00130817	0.0261019	Protein containing ALS2cr12 (ALS2CR12) domain [Source:UniProtKB/TrEMBL;Acc:Q17469]
WBGene00013029	glrx-5	1197.83	0.722092	0.224756	3.21278	0.00131456	0.0261977	Glutaredoxin [Source:UniProtKB/TrEMBL;Acc:Q9XTU9]
WBGene00014308	F07H5.4	812.222	-1.48683	0.462921	-3.21185	0.00131885	0.0262517
WBGene00220246	ZK858.10	453.032	-0.915719	0.285561	-3.20674	0.00134248	0.0266899
WBGene00009803	F47B8.2	1613.03	0.783644	0.244421	3.20612	0.00134537	0.0267153
WBGene00008694	F11C1.5	1433.37	-0.90263	0.281677	-3.20449	0.00135303	0.0268351
WBGene00010196	F57C2.4	2199.74	1.27196	0.39699	3.20401	0.00135526	0.0268472
WBGene00012795	Y43E12A.3	273.044	-1.09252	0.34109	-3.20303	0.00135989	0.0269067
WBGene00004110	pqn-20	2510.29	-1.67098	0.521767	-3.20254	0.00136223	0.0269207	Prion-like-(Q/N-rich)-domain-bearing protein [Source:UniProtKB/TrEMBL;Acc:O01505]
WBGene00017025	D1037.1	1322.94	-1.02961	0.321604	-3.20147	0.00136728	0.0269883
WBGene00022334	Y82E9BR.1	188.893	-1.12006	0.350005	-3.20014	0.00137361	0.0270809
WBGene00023069	rncs-1	1410.18	-2.57393	0.804569	-3.19914	0.00137837	0.0271424
WBGene00007374	C06C3.3	30.0942	-1.29646	0.405305	-3.19873	0.00138036	0.0271492
WBGene00002879	let-754	5238.95	0.926364	0.289685	3.19783	0.00138465	0.0271803	Adenylate kinase [Source:UniProtKB/Swiss-Prot;Acc:P34346]
WBGene00219908	F20C5.10	377.591	-0.882311	0.27592	-3.19771	0.00138522	0.0271803	NA
WBGene00018533	F47B7.2	2752.26	0.495388	0.154979	3.19649	0.0013911	0.0272633	Sulfhydryl oxidase [Source:UniProtKB/TrEMBL;Acc:Q95QF9]
WBGene00007489	C09G5.7	49.6366	-1.14265	0.357546	-3.19582	0.00139434	0.0272944
WBGene00001747	gsp-1	10598.5	0.591892	0.185248	3.19513	0.00139766	0.0273271	Serine/threonine-protein phosphatase PP1-alpha [Source:UniProtKB/Swiss-Prot;Acc:Q27497]
WBGene00044605	ttr-36	1562.55	0.903691	0.282883	3.19457	0.00140038	0.027348	TransThyretin-Related family domain [Source:UniProtKB/TrEMBL;Acc:Q45EK1]
WBGene00001121	dyf-5	29.0967	-1.421	0.445115	-3.19242	0.00141085	0.0274875	Serine/threonine-protein kinase dyf-5 [Source:UniProtKB/Swiss-Prot;Acc:B3WFY8]
WBGene00012845	set-24	954.484	-1.23726	0.387543	-3.19259	0.00141005	0.0274875	SET (Trithorax/polycomb) domain containing [Source:UniProtKB/TrEMBL;Acc:Q9U2G8]
WBGene00000174	aqp-6	98.6733	1.02053	0.319767	3.19149	0.00141542	0.027544	AQuaPorin or aquaglyceroporin related [Source:UniProtKB/TrEMBL;Acc:D5MCS1]
WBGene00011237	gkow-1	2383.36	-1.55141	0.486245	-3.1906	0.00141978	0.0275964	G patch domain and KOW motifs-containing protein homolog 1 [Source:UniProtKB/Swiss-Prot;Acc:Q21924]
WBGene00189949	Y48G1C.13	332.917	1.0449	0.327531	3.19024	0.00142157	0.0275987
WBGene00001681	gpc-1	133.974	0.996547	0.312426	3.1897	0.00142419	0.0276172	Guanine nucleotide-binding protein subunit gamma [Source:UniProtKB/Swiss-Prot;Acc:P54406]
WBGene00002248	lam-3	615.127	-1.3507	0.423761	-3.18742	0.0014355	0.0276743	LAMinin related. See also lmb; Laminin alpha chain [Source:UniProtKB/TrEMBL;Acc:G5ECE3]
WBGene00017263	F08F3.6	1627.08	-1.15647	0.362809	-3.18755	0.00143485	0.0276743
WBGene00017352	F10E7.11	58.0316	-1.42579	0.447222	-3.18811	0.00143208	0.0276743
WBGene00019004	xpg-1	1026.15	-1.54912	0.485909	-3.18809	0.00143214	0.0276743	XPG (Xeroderma Pigmentosum group G) DNA repair gene homolog [Source:UniProtKB/TrEMBL;Acc:O44737]
WBGene00044079	tag-241	311.049	-0.935506	0.293456	-3.18789	0.00143315	0.0276743
WBGene00007286	C04A11.2	277.054	-1.30881	0.410796	-3.18603	0.00144239	0.0277103
WBGene00009831	F47G9.4	189.736	-1.11435	0.349741	-3.1862	0.00144156	0.0277103	Probable RING finger protein 207 homolog [Source:UniProtKB/Swiss-Prot;Acc:Q20548]
WBGene00015703	C11D2.7	1999.12	0.622521	0.195388	3.18607	0.00144218	0.0277103
WBGene00010111	F55D12.2	322.361	-0.901787	0.283116	-3.18522	0.00144644	0.0277559
WBGene00017905	F28F5.6	489.898	0.845767	0.26565	3.18376	0.00145373	0.0278312
WBGene00021800	Y53G8AL.2	6236.61	0.572112	0.179683	3.184	0.00145253	0.0278312
WBGene00009174	F26H9.2	1112.27	-1.69727	0.5332	-3.18318	0.00145667	0.0278552
WBGene00044156	Y66C5A.1	60.3686	1.07304	0.337154	3.18263	0.00145943	0.0278759
WBGene00194986	T27F7.4	870.753	0.583625	0.183442	3.18153	0.00146498	0.0279494	Mannosyltransferase [Source:UniProtKB/TrEMBL;Acc:G5EDN2]
WBGene00019608	ani-2	3075.56	-1.51334	0.475765	-3.18085	0.00146842	0.0279829	Anillin-like protein 2 [Source:UniProtKB/Swiss-Prot;Acc:Q09994]
WBGene00007042	pbrm-1	4709.92	-1.21125	0.380878	-3.18014	0.00147205	0.0280197	PolyBRoMo domain containing [Source:UniProtKB/TrEMBL;Acc:G5EEY5]
WBGene00019302	K02D10.2	25.2155	-1.5713	0.494155	-3.17978	0.00147387	0.0280222
WBGene00009888	F49E2.5	6559.89	-0.974376	0.306478	-3.17927	0.00147646	0.0280391
WBGene00000264	brc-1	716.99	-1.24954	0.393376	-3.17644	0.00149093	0.0282167	BRCa homolog (Tumor suppressor gene Brca1) [Source:UniProtKB/TrEMBL;Acc:B6VQ61]
WBGene00010962	ctc-3	32905.6	-1.24854	0.39304	-3.17662	0.00149003	0.0282167	Cytochrome c oxidase subunit 3 [Source:UniProtKB/Swiss-Prot;Acc:P24891]
WBGene00011601	zim-3	881.912	-1.23108	0.387548	-3.17658	0.00149024	0.0282167	Zinc finger In Meiosis [Source:UniProtKB/TrEMBL;Acc:A0A061AJC4]
WBGene00003709	nhr-119	482.004	1.14683	0.361165	3.17536	0.00149651	0.0282721	Nuclear Hormone Receptor family [Source:UniProtKB/TrEMBL;Acc:G4SCE4]
WBGene00020321	T07F12.1	244.672	0.700985	0.220768	3.17521	0.00149727	0.0282721
WBGene00004121	ptrn-1	971.439	-1.27301	0.401075	-3.174	0.00150355	0.0282877	Patronin (microtubule-binding protein) homolog [Source:UniProtKB/Swiss-Prot;Acc:U4PAZ9]
WBGene00004862	sma-9	1768.54	-0.729554	0.229897	-3.1734	0.00150665	0.0282877	SMA-9 class IIb; SMAll [Source:UniProtKB/TrEMBL;Acc:G5ED62]
WBGene00015747	C13G5.2	1680.63	-0.851431	0.268298	-3.17345	0.00150638	0.0282877
WBGene00017313	cpsf-2	1747.89	-1.36851	0.431128	-3.17426	0.00150217	0.0282877	Probable cleavage and polyadenylation specificity factor subunit 2 [Source:UniProtKB/Swiss-Prot;Acc:O17403]
WBGene00022880	tbc-2	2023.78	-1.67235	0.526896	-3.17396	0.00150375	0.0282877	TBC (Tre-2/Bub2/Cdc16) domain family [Source:UniProtKB/TrEMBL;Acc:Q23419]
WBGene00007723	C25F9.2	24.3857	-1.6033	0.505361	-3.17259	0.00151087	0.0283348
WBGene00019129	F59G1.8	898.915	-0.863279	0.272227	-3.17117	0.00151827	0.0284413
WBGene00009975	F53C11.5	2840.9	-1.53284	0.483424	-3.17081	0.00152017	0.0284447
WBGene00016425	C34H4.2	1412.38	0.983542	0.310287	3.16978	0.00152553	0.0285127
WBGene00195071	C16C8.21	10.1968	-2.26153	0.713699	-3.16875	0.00153097	0.0285822
WBGene00003822	nsy-1	1247.4	-0.615035	0.194169	-3.16752	0.00153745	0.0286543	Mitogen-activated protein kinase kinase kinase nsy-1 [Source:UniProtKB/Swiss-Prot;Acc:Q21029]
WBGene00004105	szy-20	1490.73	-1.12894	0.356497	-3.16675	0.00154151	0.0286543	SZY-20A; Suppressor of ZYg-1 [Source:UniProtKB/TrEMBL;Acc:G5EGU9]
WBGene00015434	C04E12.4	169.16	-0.981598	0.309932	-3.16714	0.00153946	0.0286543
WBGene00020335	ttr-30	437.505	0.718688	0.226951	3.16671	0.00154176	0.0286543	TransThyretin-Related family domain [Source:UniProtKB/TrEMBL;Acc:Q22341]
WBGene00004762	sel-5	2162.26	-1.45094	0.458258	-3.1662	0.00154444	0.0286718	Serine/threonine-protein kinase sel-5 [Source:UniProtKB/Swiss-Prot;Acc:G5ECQ3]
WBGene00003508	mut-16	1978	-1.38599	0.437895	-3.16512	0.00155017	0.0287459	MUTator [Source:UniProtKB/TrEMBL;Acc:O62011]
WBGene00012002	T24H10.4	1512.91	-1.38306	0.437024	-3.16473	0.00155225	0.0287522
WBGene00012434	Y11D7A.10	2445.17	0.819219	0.2589	3.16423	0.00155496	0.0287702
WBGene00018986	cdo-1	920.872	0.752174	0.237801	3.16304	0.00156133	0.0288559	Cysteine dioxygenase 1 [Source:UniProtKB/Swiss-Prot;Acc:Q20893]
WBGene00019332	K02F3.9	1083.5	0.807395	0.255295	3.1626	0.00156368	0.028867
WBGene00016822	C50E3.11	728.976	-1.25583	0.397131	-3.16226	0.00156549	0.0288683
WBGene00003723	nhr-133	263.115	0.62857	0.198808	3.16169	0.00156859	0.0288869	Nuclear hormone receptor family member nhr-133 [Source:UniProtKB/Swiss-Prot;Acc:O16354]
WBGene00004150	pqn-67	45.0621	-1.08647	0.343664	-3.16142	0.00157	0.0288869	Prion-like-(Q/N-rich)-domain-bearing protein [Source:UniProtKB/TrEMBL;Acc:Q9XUQ0]
WBGene00004118	pqn-29	46.4146	-1.50772	0.477323	-3.15871	0.00158469	0.0290926	Prion-like-(Q/N-rich)-domain-bearing protein [Source:UniProtKB/TrEMBL;Acc:K8F812]
WBGene00022790	ZK682.7	9.13066	-2.67537	0.84692	-3.15895	0.00158341	0.0290926
WBGene00015666	gad-2	38.094	-1.44332	0.457039	-3.15798	0.00158865	0.0291329
WBGene00001127	dyf-11	90.0864	-1.69028	0.535794	-3.15473	0.00160648	0.0293508
WBGene00008101	C44H9.6	121.695	-0.911434	0.288939	-3.15442	0.0016082	0.0293508
WBGene00010871	M05B5.3	57.6512	-1.44546	0.458212	-3.15457	0.00160737	0.0293508
WBGene00017631	F20B6.7	20.861	-2.14856	0.680925	-3.15535	0.00160306	0.0293508
WBGene00021114	W09C3.7	1035.19	1.06212	0.336733	3.1542	0.0016094	0.0293508
WBGene00009812	suca-1	6010.3	0.589061	0.186806	3.15334	0.00161413	0.0293723	Succinate--CoA ligase [ADP-forming] subunit beta, mitochondrial [Source:UniProtKB/Swiss-Prot;Acc:P53588]
WBGene00220049	R106.7	182.184	-1.51788	0.481356	-3.15334	0.00161412	0.0293723	NA
WBGene00003948	pbs-2	10448.4	0.996745	0.316342	3.15085	0.00162796	0.0295072	Proteasome subunit beta type [Source:UniProtKB/TrEMBL;Acc:O62102]
WBGene00004053	tank-1	2163.37	-0.949387	0.301243	-3.15157	0.00162395	0.0295072	Tankyrase-like protein [Source:UniProtKB/Swiss-Prot;Acc:Q9TXQ1]
WBGene00011066	ztf-15	1039	-1.83365	0.581875	-3.15127	0.0016256	0.0295072	Zinc finger putative Transcription Factor family [Source:UniProtKB/TrEMBL;Acc:Q21777]
WBGene00015486	C05D11.9	1272.8	-1.53659	0.487727	-3.15051	0.00162987	0.0295072
WBGene00018420	F44E2.7	2660.53	-1.22723	0.389547	-3.1504	0.00163047	0.0295072	Putative zinc finger protein F44E2.7 [Source:UniProtKB/Swiss-Prot;Acc:P34437]
WBGene00016102	C25F6.1	519.757	-0.698189	0.221653	-3.14991	0.00163319	0.0295241
WBGene00004809	skr-3	3176.26	0.750312	0.238333	3.14817	0.00164294	0.0296486	SKR-3; SKp1 Related (Ubiquitin ligase complex component) [Source:UniProtKB/TrEMBL;Acc:G5EE67]
WBGene00022448	pinn-1	1211.02	0.874585	0.277819	3.14805	0.00164366	0.0296486	Peptidyl-prolyl cis-trans isomerase [Source:UniProtKB/TrEMBL;Acc:Q9N492]
WBGene00000198	art-1	5976.5	0.517121	0.164557	3.1425	0.00167513	0.0301041	Probable very-long-chain enoyl-CoA reductase art-1 [Source:UniProtKB/Swiss-Prot;Acc:Q9N5Y2]
WBGene00000562	cng-1	336.421	-1.55147	0.493609	-3.14312	0.00167157	0.0301041	Cyclic Nucleotide Gated channel [Source:UniProtKB/TrEMBL;Acc:A8WI01]
WBGene00003735	nhx-8	896.105	0.724415	0.23057	3.14184	0.00167889	0.0301041	Sodium/hydrogen exchanger [Source:UniProtKB/TrEMBL;Acc:G5EBN7]
WBGene00003920	par-5	42270.9	0.83276	0.265039	3.14203	0.00167778	0.0301041	14-3-3-like protein 1 [Source:UniProtKB/Swiss-Prot;Acc:P41932]
WBGene00011957	T23F11.6	611.744	0.845095	0.268992	3.14172	0.0016796	0.0301041
WBGene00044457	C18H7.11	541.874	1.11587	0.355182	3.14168	0.00167983	0.0301041
WBGene00003603	nhr-4	501.697	0.579947	0.184649	3.14081	0.00168482	0.0301608	Nuclear hormone receptor family member nhr-4 [Source:UniProtKB/Swiss-Prot;Acc:O45436]
WBGene00008172	C48B4.9	905.425	-0.866033	0.275902	-3.13891	0.00169577	0.0302912
WBGene00012231	W04A4.2	753.788	0.996152	0.317347	3.139	0.00169528	0.0302912
WBGene00015896	C17C3.15	92.1568	-1.17141	0.373247	-3.13842	0.0016986	0.0303091
WBGene00003391	mog-3	4686.94	-0.891432	0.284098	-3.13776	0.00170245	0.0303245	Masculinisation Of Germline; Sex determining protein MOG-3 [Source:UniProtKB/TrEMBL;Acc:G5EBT5]
WBGene00013638	Y105C5A.14	154.26	-1.18811	0.378702	-3.13733	0.00170496	0.0303245
WBGene00013867	ZC373.2	19563.5	1.19251	0.380104	3.13733	0.00170495	0.0303245
WBGene00013702	Y106G6D.6	240.457	0.954656	0.304325	3.13696	0.0017071	0.03033
WBGene00018376	F43C9.2	667.995	0.934047	0.297811	3.13638	0.00171049	0.0303575
WBGene00044468	Y69A2AL.2	2201.66	1.05223	0.335603	3.13534	0.00171654	0.0304323	Phospholipase A(2) [Source:UniProtKB/TrEMBL;Acc:Q3V5J7]
WBGene00008417	D2030.7	1644.14	-1.32208	0.421751	-3.13474	0.00172008	0.0304539
WBGene00044921	F53C11.9	281.83	1.0962	0.349719	3.1345	0.00172144	0.0304539
WBGene00004384	rnp-1	2623.71	-0.724823	0.23128	-3.13396	0.00172466	0.0304782	RNA-binding protein rnp-1 [Source:UniProtKB/Swiss-Prot;Acc:Q10667]
WBGene00010357	H03A11.2	195.782	-1.21005	0.386268	-3.13266	0.00173231	0.0305807
WBGene00008970	F20C5.5	37.8872	-1.69163	0.540168	-3.13167	0.00173818	0.0306516
WBGene00011112	R07E5.4	677.936	1.13461	0.362474	3.13019	0.00174693	0.0307731
WBGene00003378	mml-1	812.495	-0.596903	0.190739	-3.12943	0.00175147	0.0308045	Protein WBSCR14 homolog [Source:UniProtKB/Swiss-Prot;Acc:P41846]
WBGene00003800	npp-14	5420.93	-0.854209	0.272989	-3.1291	0.00175342	0.0308045	Nuclear pore complex protein 14 [Source:UniProtKB/Swiss-Prot;Acc:Q17602]
WBGene00007050	utp-20	1689.1	-1.31745	0.421051	-3.12895	0.0017543	0.0308045	UTP small subunit (SSU) processome component homolog [Source:UniProtKB/TrEMBL;Acc:Q19545]
WBGene00006939	wee-1.2	64.7692	-1.72697	0.552264	-3.12707	0.0017656	0.03097
WBGene00013562	Y75B8A.32	50.0899	-1.37757	0.440619	-3.12644	0.00176937	0.0309907
WBGene00017127	E04F6.8	4655.64	1.16495	0.372673	3.12594	0.00177239	0.0309907
WBGene00020893	T28C12.6	73.5453	1.14091	0.364971	3.12602	0.0017719	0.0309907
WBGene00006945	wars-1	4651.19	0.772447	0.247258	3.12405	0.00178382	0.0311575	Tryptophanyl(W) Amino-acyl tRNA Synthetase; Tryptophanyl-tRNA synthetase (Cytosolic) [Source:UniProtKB/TrEMBL;Acc:G5EDY2]
WBGene00007008	rfp-1	2532.45	-1.25154	0.40071	-3.12329	0.00178839	0.0312044	E3 ubiquitin-protein ligase bre-1 [Source:UniProtKB/Swiss-Prot;Acc:P34537]
WBGene00004125	mdt-30	1128.78	-1.48104	0.474451	-3.12157	0.00179887	0.0313068	Glutamine/asparagine-rich protein mdt-30 [Source:UniProtKB/Swiss-Prot;Acc:P34428]
WBGene00008178	C48D1.5	56.5678	-1.02905	0.329624	-3.1219	0.00179689	0.0313068
WBGene00022205	Y73B3A.3	83.9247	-0.99833	0.319834	-3.1214	0.00179994	0.0313068
WBGene00003950	pbs-4	8879.63	0.906985	0.290704	3.11996	0.00180877	0.0314273	Proteasome subunit beta type-2 [Source:UniProtKB/Swiss-Prot;Acc:P91477]
WBGene00000018	abl-1	873.851	-1.00227	0.321283	-3.11957	0.00181112	0.0314353	Tyrosine-protein kinase abl-1 [Source:UniProtKB/Swiss-Prot;Acc:P03949]
WBGene00007765	C27B7.9	2278.48	1.20657	0.387599	3.11293	0.00185239	0.0321179
WBGene00020736	T23F2.3	803.53	1.30246	0.418494	3.11226	0.00185662	0.0321574	UPF0057 membrane protein T23F2.3 [Source:UniProtKB/Swiss-Prot;Acc:Q22700]
WBGene00018648	F49F1.8	25.5814	-2.17081	0.697599	-3.11183	0.00185929	0.03217
WBGene00004337	rfc-1	4016.28	-1.44607	0.464826	-3.111	0.00186457	0.0322276	RFC (DNA replication factor) family [Source:UniProtKB/TrEMBL;Acc:Q18841]
WBGene00014259	ZK1320.11	1017.55	0.650782	0.209293	3.10942	0.00187452	0.0323658
WBGene00019118	F59E12.1	2545.73	-1.53496	0.49374	-3.10885	0.0018782	0.0323954
WBGene00009163	drsh-1	1414.4	-1.49536	0.481436	-3.10604	0.0018961	0.0326701	Ribonuclease 3 [Source:UniProtKB/Swiss-Prot;Acc:O01326]
WBGene00000206	asb-1	9634.16	0.788827	0.254108	3.1043	0.0019073	0.0326952	ATP Synthase B homolog [Source:UniProtKB/TrEMBL;Acc:Q20053]
WBGene00003982	pes-9	9028.36	0.583505	0.188024	3.10336	0.00191336	0.0326952	Patterned Expression Site [Source:UniProtKB/TrEMBL;Acc:O18000]
WBGene00006382	taf-1	1414.44	-1.13081	0.364315	-3.10392	0.00190974	0.0326952	Transcription initiation factor TFIID subunit 1 [Source:UniProtKB/Swiss-Prot;Acc:G5EGM3]
WBGene00006944	wrn-1	1295.69	-1.44497	0.465509	-3.10407	0.00190877	0.0326952	Probable Werner syndrome ATP-dependent helicase homolog 1 [Source:UniProtKB/Swiss-Prot;Acc:Q19546]
WBGene00008357	nspc-16	274.427	0.786144	0.253231	3.10445	0.00190631	0.0326952	Nematode Specific Peptide family, group C [Source:UniProtKB/TrEMBL;Acc:G5ECP8]
WBGene00014253	ZK1320.3	10777.9	0.802735	0.258662	3.10342	0.001913	0.0326952
WBGene00014979	ZC47.11	13.9618	-2.04513	0.658923	-3.10375	0.00191086	0.0326952
WBGene00019311	K02E7.6	255.968	-1.13204	0.364736	-3.10372	0.00191101	0.0326952
WBGene00235269	F59E12.15	97.1453	-1.01006	0.32551	-3.103	0.00191569	0.0327012
WBGene00001040	dnj-22	2419.08	-1.21551	0.391897	-3.1016	0.00192478	0.0328225	DNaJ domain (Prokaryotic heat shock protein) [Source:UniProtKB/TrEMBL;Acc:O17002]
WBGene00005642	srp-1	738.925	0.871788	0.281192	3.10033	0.00193303	0.0329292	SeRPin; Serine or cysteine protease inhibitor [Source:UniProtKB/TrEMBL;Acc:G5EE40]
WBGene00007764	C27B7.7	123.846	-0.676109	0.218129	-3.09959	0.00193791	0.0329783	Ig-like and fibronectin type-III domain-containing protein C27B7.7 [Source:UniProtKB/Swiss-Prot;Acc:Q18245]
WBGene00017895	vrk-1	3716.25	-1.44318	0.466061	-3.09655	0.00195786	0.0332837	Serine/threonine-protein kinase VRK1 [Source:UniProtKB/Swiss-Prot;Acc:Q19848]
WBGene00004931	sod-2	5243.35	0.903565	0.291846	3.09603	0.00196132	0.0333081	Superoxide dismutase [Mn] 1, mitochondrial [Source:UniProtKB/Swiss-Prot;Acc:P31161]
WBGene00008366	tpra-1	432.203	0.701699	0.226686	3.09547	0.00196499	0.0333363	Transmembrane protein adipocyte-associated 1 homolog [Source:UniProtKB/Swiss-Prot;Acc:Q18936]
WBGene00003239	mig-2	1751.83	0.54469	0.176137	3.09241	0.00198536	0.0336327	Rac-like GTPase [Source:UniProtKB/TrEMBL;Acc:G5EBV3]
WBGene00018987	lgl-1	682.606	-0.851732	0.275442	-3.09224	0.00198652	0.0336327	LGL-1; Lgl-1 protein [Source:UniProtKB/TrEMBL;Acc:G5EEI1]
WBGene00001443	fli-1	1745.27	-1.23431	0.399287	-3.09129	0.00199288	0.0336565	Protein flightless-1 homolog [Source:UniProtKB/Swiss-Prot;Acc:P34268]
WBGene00017091	ttr-40	134.413	1.06693	0.345148	3.09122	0.00199333	0.0336565	TransThyretin-Related family domain [Source:UniProtKB/TrEMBL;Acc:Q65ZI5]
WBGene00020164	T02G5.4	365.765	-0.699737	0.22637	-3.09112	0.00199404	0.0336565
WBGene00000017	abf-6	377.798	0.921174	0.298167	3.08946	0.0020052	0.0337599	ABF-6; AntiBacterial Factor related [Source:UniProtKB/TrEMBL;Acc:G5EBS3]
WBGene00001094	dars-1	11724.6	0.51957	0.168234	3.08838	0.00201253	0.0337599	Aspartate--tRNA ligase, cytoplasmic [Source:UniProtKB/Swiss-Prot;Acc:Q03577]
WBGene00005291	srh-70	11.3728	-2.17587	0.704519	-3.08845	0.00201204	0.0337599	Serpentine Receptor, class H [Source:UniProtKB/TrEMBL;Acc:O18104]
WBGene00011414	T04A8.13	38.0209	-1.98363	0.642347	-3.08809	0.00201445	0.0337599
WBGene00015488	C05D11.13	222.394	-1.10783	0.358708	-3.08838	0.0020125	0.0337599
WBGene00016823	C50E3.12	551.541	-1.69314	0.547966	-3.08986	0.00200251	0.0337599
WBGene00219748	linc-46	23.514	-1.93258	0.625631	-3.08902	0.00200821	0.0337599	NA
WBGene00044737	ttr-45	7824.36	0.84704	0.274438	3.08645	0.00202561	0.0339126	TransThyretin-Related family domain [Source:UniProtKB/TrEMBL;Acc:Q2EEM8]
WBGene00045275	F18E3.12	183.805	1.07562	0.348573	3.08577	0.00203028	0.0339563
WBGene00020200	T04A6.1	507.973	0.766023	0.2483	3.08507	0.00203506	0.034002
WBGene00219701	anr-34	15.1352	-1.82999	0.593414	-3.08384	0.00204349	0.0341084	NA
WBGene00011095	gana-1	958.674	0.758369	0.246031	3.08242	0.00205327	0.0342236	GAlactosidase/N-Acetylgalactosaminidase [Source:UniProtKB/TrEMBL;Acc:Q21801]
WBGene00012591	nspe-1	277.226	1.24353	0.403452	3.08223	0.00205454	0.0342236	Nematode Specific Peptide family, group E [Source:UniProtKB/TrEMBL;Acc:Q9NAJ8]
WBGene00017667	ttr-37	321.014	0.878228	0.284997	3.08153	0.00205938	0.0342698	TransThyretin-Related family domain [Source:UniProtKB/TrEMBL;Acc:O16586]
WBGene00001110	duo-1	745.083	-1.33114	0.432074	-3.08082	0.00206434	0.0343178	Deubiquitylating with USP/UBP and OTU domains [Source:UniProtKB/TrEMBL;Acc:Q7JLI8]
WBGene00021886	Y54G2A.21	24.1038	-1.52027	0.493657	-3.0796	0.00207276	0.0344232
WBGene00018355	ceh-86	228.466	-1.34697	0.437432	-3.07927	0.00207509	0.0344274	C. Elegans Homeobox [Source:UniProtKB/TrEMBL;Acc:O17102]
WBGene00011225	R10H10.7	871.415	-1.40119	0.455131	-3.07865	0.00207939	0.0344299
WBGene00015588	C08A9.8	21.941	-1.55374	0.504681	-3.07865	0.0020794	0.0344299
WBGene00009971	F53C11.1	1221.48	0.839948	0.272875	3.07814	0.00208298	0.0344547
WBGene00008086	C44C10.5	27.1802	-1.4873	0.483342	-3.07712	0.00209009	0.0345005
WBGene00011348	T01H3.2	1266.12	-0.863121	0.280521	-3.07685	0.00209201	0.0345005
WBGene00017358	F10E9.7	944.116	-1.10179	0.358047	-3.07722	0.00208938	0.0345005
WBGene00007710	rsa-1	2446.35	-1.30747	0.425172	-3.07516	0.00210387	0.0346615	Serine/threonine-protein phosphatase 2A regulatory subunit rsa-1 [Source:UniProtKB/Swiss-Prot;Acc:O02217]
WBGene00194682	F40D4.17	76.1226	-1.10532	0.359474	-3.07482	0.00210631	0.0346671
WBGene00045473	F30A10.14	392.387	0.92987	0.302449	3.07447	0.0021088	0.0346736
WBGene00044004	C24A8.6	28.9696	-1.40833	0.458167	-3.07383	0.00211333	0.0347136
WBGene00005006	spr-1	921.05	-1.54303	0.502169	-3.07272	0.00212116	0.0347754	REST corepressor spr-1 [Source:UniProtKB/Swiss-Prot;Acc:Q18919]
WBGene00013554	Y75B8A.19	344.272	0.534699	0.174016	3.0727	0.0021213	0.0347754
WBGene00003395	mom-2	4623.54	-0.915622	0.298195	-3.07055	0.00213665	0.0349924
WBGene00003624	nhr-28	587.801	0.545742	0.177762	3.07008	0.00214003	0.0350131	Nuclear hormone receptor family member nhr-28 [Source:UniProtKB/Swiss-Prot;Acc:Q17905]
WBGene00011337	T01G1.2	499.904	0.635939	0.207237	3.06865	0.00215028	0.0351251
WBGene00016005	ift-74	22.9633	-1.53976	0.501833	-3.06827	0.00215304	0.0351251	IFT (Chlamydomonas IntraFlagellar Transport) homolog [Source:UniProtKB/TrEMBL;Acc:Q18106]
WBGene00044680	F30A10.13	381.886	1.21884	0.397244	3.06824	0.00215325	0.0351251
WBGene00004746	sdc-2	721.417	-1.20415	0.392702	-3.06633	0.00216702	0.0352802	SDC-2; Sex determination and Dosage Compensation defect [Source:UniProtKB/TrEMBL;Acc:G5EBL3]
WBGene00017836	F26F12.5	42.1417	1.22456	0.399355	3.06636	0.00216685	0.0352802
WBGene00000507	cit-1.1	1023.71	-1.01345	0.330609	-3.06542	0.00217364	0.0353185	Cyclin-T1.1 [Source:UniProtKB/Swiss-Prot;Acc:P34425]
WBGene00006601	tpi-1	13919	1.00281	0.327115	3.06562	0.0021722	0.0353185	Triosephosphate isomerase [Source:UniProtKB/Swiss-Prot;Acc:Q10657]
WBGene00022500	lfi-1	1771.98	-0.923993	0.3015	-3.06466	0.00217918	0.0353737	Lin-5 (Five) Interacting protein [Source:UniProtKB/TrEMBL;Acc:Q45EJ8]
WBGene00012409	Y7A5A.3	9.15244	-2.02126	0.659619	-3.06428	0.00218195	0.035384
WBGene00019824	R02D3.7	1142	-1.42	0.463501	-3.06364	0.00218659	0.0353898
WBGene00197097	F13B9.9	9.25787	-2.25939	0.737445	-3.0638	0.00218543	0.0353898	NA
WBGene00009406	F35C11.7	105.376	1.43057	0.467049	3.063	0.00219131	0.0354316
WBGene00011429	T04C12.7	59.3905	0.93813	0.306408	3.0617	0.00220087	0.0354879
WBGene00015625	C09B8.8	48.6207	0.937192	0.306107	3.06165	0.00220123	0.0354879
WBGene00018304	agr-1	89.6872	-1.00187	0.3272	-3.06195	0.00219902	0.0354879	AGRin (Synaptic protein) homolog; AGRin (Synaptic protein) homolog family member [Source:UniProtKB/TrEMBL;Acc:G5EG68]
WBGene00007890	C33A12.19	623.409	0.878898	0.287097	3.06133	0.00220356	0.0354908
WBGene00044080	D1086.10	7505.48	0.95785	0.312973	3.06049	0.00220973	0.0355556
WBGene00001824	hbl-1	329.506	-0.871165	0.284731	-3.0596	0.00221631	0.0356023	Hunchback-like protein [Source:UniProtKB/Swiss-Prot;Acc:Q9XYD3]
WBGene00002276	lem-3	2042.5	-1.23741	0.404447	-3.05952	0.00221694	0.0356023	Ankyrin repeat and LEM domain-containing protein 1 homolog [Source:UniProtKB/Swiss-Prot;Acc:G5EGA3]
WBGene00010048	F54D5.2	963.269	-1.16578	0.381114	-3.05887	0.00222174	0.0356448
WBGene00009204	F28C6.4	549.972	-1.11723	0.365493	-3.05678	0.00223728	0.03579
WBGene00009367	F33H2.3	6528.81	0.665816	0.21778	3.05729	0.00223352	0.03579	Acidic leucine-rich nuclear phosphoprotein 32-related protein 1 [Source:UniProtKB/Swiss-Prot;Acc:O62220]
WBGene00016360	C33G8.2	137.473	-1.55076	0.507288	-3.05697	0.00223589	0.03579
WBGene00011311	T01B7.5	2682.3	-1.23907	0.40568	-3.05431	0.0022558	0.0360514
WBGene00012358	W09D6.5	1128.77	-1.08915	0.356708	-3.05335	0.00226304	0.0361322
WBGene00020949	W02F12.4	1417.58	-1.19438	0.391331	-3.0521	0.00227246	0.0362477
WBGene00000374	cyp-31A1	453.694	-1.04186	0.341421	-3.05156	0.00227659	0.0362785
WBGene00015932	C17H12.6	422.923	0.842903	0.276268	3.05104	0.00228051	0.036306
WBGene00006436	ttn-1	913.272	-1.10285	0.361555	-3.05029	0.00228619	0.0363548	Titin homolog [Source:UniProtKB/Swiss-Prot;Acc:G4SLH0]
WBGene00011244	R11D1.3	150.544	0.946224	0.310231	3.05006	0.00228797	0.0363548
WBGene00017539	F17E9.2	340.836	0.916656	0.300683	3.04858	0.00229928	0.0364994
WBGene00012375	mecr-1	3359.01	0.731221	0.239927	3.04768	0.00230615	0.0365034	Enoyl-[acyl-carrier-protein] reductase, mitochondrial [Source:UniProtKB/Swiss-Prot;Acc:O45903]
WBGene00013249	Y57A10A.4	107.822	-1.10658	0.363067	-3.04787	0.00230473	0.0365034
WBGene00022720	ZK370.6	104.571	0.89914	0.295014	3.04779	0.0023053	0.0365034
WBGene00004790	sgn-1	171.769	0.797904	0.261887	3.04675	0.0023133	0.0365117	SarcoGlycaN [Source:UniProtKB/TrEMBL;Acc:Q19185]
WBGene00011263	R13H4.5	609.022	0.640188	0.210114	3.04686	0.00231248	0.0365117
WBGene00012452	Y17D7B.4	330.691	-1.15137	0.377848	-3.04718	0.00230999	0.0365117
WBGene00010605	K06G5.1	24091	0.737469	0.242183	3.04509	0.0023261	0.0366788
WBGene00010560	eif-2beta	9868.31	0.531286	0.174506	3.04452	0.00233055	0.036714	Eukaryotic translation initiation factor 2 subunit 2 [Source:UniProtKB/Swiss-Prot;Acc:Q21230]
WBGene00004319	rbr-2	1115.24	-1.54765	0.508617	-3.04286	0.00234342	0.0368465	Lysine-specific demethylase rbr-2 [Source:UniProtKB/Swiss-Prot;Acc:Q23541]
WBGene00219778	B0025.7	106.904	-0.935235	0.307331	-3.04308	0.00234168	0.0368465	NA
WBGene00008274	C53B4.4	2548.5	-1.421	0.467275	-3.04105	0.00235758	0.0370339
WBGene00000854	cux-7	1188.02	-1.36365	0.448458	-3.04076	0.00235982	0.037034	Clk-2 Upstream, human gene XE7 related [Source:UniProtKB/TrEMBL;Acc:Q95YE8]
WBGene00001951	hlh-4	33.9627	-1.30814	0.430348	-3.03973	0.00236787	0.0371251	Helix-loop-helix protein 4 [Source:UniProtKB/Swiss-Prot;Acc:P34555]
WBGene00011129	R07H5.9	54.6507	-1.33782	0.440255	-3.03874	0.00237566	0.0371767
WBGene00021520	Y41D4B.18	186.937	-1.20374	0.396097	-3.03901	0.00237361	0.0371767
WBGene00003389	mog-1	3276.69	-1.29964	0.427782	-3.0381	0.00238079	0.0372218	Probable pre-mRNA-splicing factor ATP-dependent RNA helicase mog-1 [Source:UniProtKB/Swiss-Prot;Acc:P34498]
WBGene00007107	pfd-4	3360.94	0.777264	0.255889	3.0375	0.00238551	0.0372252	Probable prefoldin subunit 4 [Source:UniProtKB/Swiss-Prot;Acc:Q17435]
WBGene00010315	F59B2.13	115.766	0.744712	0.24515	3.03778	0.00238326	0.0372252	Putative G-protein coupled receptor F59B2.13 [Source:UniProtKB/Swiss-Prot;Acc:P34488]
WBGene00007395	dcar-1	1215.44	0.722423	0.237867	3.03709	0.00238872	0.0372399	DihydroCaffeic Acid Receptor; L-3,4-dihydroxyphenylalanine receptor [Source:UniProtKB/TrEMBL;Acc:G5EDI0]
WBGene00012216	W02D9.10	1422.56	0.597289	0.196683	3.03681	0.00239095	0.0372399
WBGene00020939	W02D7.3	56.7525	1.21959	0.401838	3.03503	0.00240509	0.0374248
WBGene00014090	ZK822.2	1744.08	0.602669	0.198657	3.03372	0.00241556	0.0374819
WBGene00017657	F21C10.7	539.197	-1.22522	0.403843	-3.03391	0.00241406	0.0374819
WBGene00018939	fbxa-190	103.301	0.790981	0.260694	3.03414	0.00241225	0.0374819	F-box A protein [Source:UniProtKB/TrEMBL;Acc:O61758]
WBGene00010879	M05D6.6	2290.11	0.60944	0.20092	3.03325	0.00241935	0.0375056
WBGene00016381	sgo-1	1265.06	-1.42176	0.468846	-3.03246	0.00242567	0.0375683	Shugoshin [Source:UniProtKB/Swiss-Prot;Acc:Q18412]
WBGene00023209	ZC513.7	5939.6	-0.935111	0.308413	-3.03201	0.00242932	0.0375897
WBGene00016245	C30B5.4	1586.98	-1.37002	0.452031	-3.03082	0.00243894	0.0377032
WBGene00007883	C33A12.4	205.189	1.10315	0.364109	3.02972	0.00244783	0.0377701
WBGene00022633	ZC581.3	195.796	-1.10678	0.365287	-3.02988	0.00244653	0.0377701
WBGene00021689	Y48G8AL.10	992.795	-0.979681	0.323552	-3.02789	0.00246267	0.0379637
WBGene00007396	tiar-3	269.432	0.746235	0.246502	3.0273	0.00246749	0.0380025	TIA-1/TIAL RNA binding protein homolog [Source:UniProtKB/TrEMBL;Acc:Q93194]
WBGene00000413	cdt-1	1897.34	-1.32401	0.437491	-3.02637	0.00247512	0.0380847	CDT (S. pombe CDC10 Dependent Transcript) homolog [Source:UniProtKB/TrEMBL;Acc:Q86S68]
WBGene00014066	rev-1	570.95	-1.30728	0.432012	-3.02603	0.00247786	0.0380913	DNA repair protein REV1 [Source:UniProtKB/TrEMBL;Acc:Q09615]
WBGene00023417	swm-1	658.195	0.818938	0.270764	3.02455	0.00249003	0.0382429	Sperm activation Without Mating [Source:UniProtKB/TrEMBL;Acc:Q18158]
WBGene00020756	T24A6.20	762.999	0.918561	0.30376	3.02397	0.00249484	0.0382812
WBGene00021869	vrp-1	2660	0.984923	0.32587	3.02244	0.00250742	0.0384385	Vitellogenin Regulating Protein [Source:UniProtKB/TrEMBL;Acc:H2L0R3]
WBGene00017967	ada-2	1723.85	-1.43768	0.475815	-3.02151	0.00251517	0.0385083	ADA (Histone acetyltransferase complex) subunit [Source:UniProtKB/TrEMBL;Acc:Q5DX44]
WBGene00044811	F12E12.11	155.377	0.905366	0.299658	3.02134	0.00251663	0.0385083
WBGene00007597	C15A11.2	28.9154	-2.015	0.667079	-3.02064	0.00252244	0.0385172
WBGene00011073	R07A4.2	123.634	0.840031	0.278117	3.02043	0.00252419	0.0385172
WBGene00012437	hum-9	260.749	-1.25011	0.413874	-3.0205	0.00252359	0.0385172	Heavy chain, Unconventional Myosin [Source:UniProtKB/TrEMBL;Acc:Q9XWR0]
WBGene00045434	Y95D11A.3	1039.15	-0.676003	0.223944	-3.01863	0.00253922	0.0387109
WBGene00003083	lst-1	2959.49	-0.747706	0.247723	-3.01831	0.00254187	0.0387156	Lateral Signaling Target [Source:UniProtKB/TrEMBL;Acc:P91820]
WBGene00003059	lpd-2	1126.7	-1.33031	0.440879	-3.0174	0.00254952	0.0387963	LiPid Depleted [Source:UniProtKB/TrEMBL;Acc:Q8IG68]
WBGene00017163	dnpp-1	3794.84	0.429799	0.142467	3.01683	0.00255437	0.0388344	Aspartyl aminopeptidase [Source:UniProtKB/Swiss-Prot;Acc:Q19087]
WBGene00008900	F16H6.10	805.276	0.857802	0.284411	3.01607	0.00256075	0.0388956
WBGene00000380	cct-5	23425.7	0.448804	0.148876	3.01462	0.00257301	0.0389063	T-complex protein 1 subunit epsilon [Source:UniProtKB/Swiss-Prot;Acc:P47209]
WBGene00006651	tts-2	445.082	-1.88302	0.624683	-3.01435	0.00257528	0.0389063
WBGene00008664	nubp-1	5728.91	0.901272	0.299024	3.01404	0.00257791	0.0389063	Cytosolic Fe-S cluster assembly factor NUBP1 homolog [Source:UniProtKB/Swiss-Prot;Acc:Q93459]
WBGene00009476	F36F2.2	211.92	-0.960821	0.318744	-3.01439	0.00257492	0.0389063
WBGene00014137	clec-187	634.249	0.810229	0.268688	3.01551	0.00256551	0.0389063	C-type LECtin [Source:UniProtKB/TrEMBL;Acc:Q9XUA7]
WBGene00016304	fbxc-41	23.922	-1.2817	0.42521	-3.01428	0.0025759	0.0389063
WBGene00194998	C16C4.18	40.581	-1.17473	0.389653	-3.01482	0.00257133	0.0389063
WBGene00001031	dnj-13	8746.42	0.452129	0.150071	3.01277	0.00258879	0.0390201	DNaJ domain (Prokaryotic heat shock protein) [Source:UniProtKB/TrEMBL;Acc:Q20774]
WBGene00018508	F46F11.1	1324.99	-0.933761	0.309952	-3.0126	0.00259018	0.0390201	Inositol hexakisphosphate and diphosphoinositol-pentakisphosphate kinase [Source:UniProtKB/Swiss-Prot;Acc:P91309]
WBGene00003655	nhr-65	273.662	0.623492	0.207076	3.01093	0.00260447	0.0391456	Nuclear hormone receptor family member nhr-65 [Source:UniProtKB/Swiss-Prot;Acc:O45907]
WBGene00009267	usp-48	3168.87	-1.23629	0.4107	-3.01021	0.0026107	0.0391456	Ubiquitin carboxyl-terminal hydrolase [Source:UniProtKB/TrEMBL;Acc:G5ECC7]
WBGene00010041	F54C9.3	3812.79	1.30467	0.433275	3.01117	0.0026024	0.0391456
WBGene00010081	F55A11.8	777.349	-1.21926	0.405103	-3.00975	0.00261463	0.0391456
WBGene00017599	F19F10.3	221.936	1.00116	0.332568	3.01041	0.00260898	0.0391456
WBGene00018164	sup-36	4498.73	0.93549	0.310831	3.00964	0.00261555	0.0391456	SUPpressor [Source:UniProtKB/TrEMBL;Acc:Q94207]
WBGene00019973	R09A1.3	325.368	0.755832	0.251155	3.00942	0.00261744	0.0391456
WBGene00235381	Y74C9A.9	40.4625	-1.05672	0.351111	-3.00965	0.00261548	0.0391456
WBGene00021933	Y55F3AR.2	1915.01	0.99634	0.33116	3.00863	0.00262427	0.0392123
WBGene00007694	C23H4.6	599.012	-1.35937	0.452179	-3.00627	0.00264473	0.0394824
WBGene00003680	nhr-90	319.441	0.651013	0.21668	3.00449	0.00266025	0.0396618	Nuclear hormone receptor family member nhr-90 [Source:UniProtKB/Swiss-Prot;Acc:O17025]
WBGene00014208	ZK1067.2	1291.94	-1.31517	0.437757	-3.00434	0.00266154	0.0396618
WBGene00001864	him-5	400.89	-1.11944	0.372841	-3.00248	0.00267794	0.0398702	High Incidence of Males (Increased X chromosome loss) [Source:UniProtKB/TrEMBL;Acc:E1B6V2]
WBGene00001852	hil-1	947.951	0.835882	0.278506	3.00131	0.00268823	0.0399874	Histone H1.X [Source:UniProtKB/Swiss-Prot;Acc:Q18336]
WBGene00003056	lon-2	1250.47	0.553548	0.184491	3.0004	0.00269622	0.0400702	LONg [Source:UniProtKB/TrEMBL;Acc:Q18530]
WBGene00010727	K09G1.1	3277.1	0.652623	0.217564	2.99968	0.00270266	0.0401037
WBGene00020467	T12F5.2	149.776	-1.37503	0.458403	-2.9996	0.00270332	0.0401037
WBGene00003724	nhr-134	281.956	0.534277	0.17815	2.99902	0.00270846	0.040108	Nuclear hormone receptor family member nhr-134 [Source:UniProtKB/Swiss-Prot;Acc:O16361]
WBGene00010440	ttr-51	15895.5	1.00717	0.335806	2.99925	0.0027065	0.040108	TransThyretin-Related family domain [Source:UniProtKB/TrEMBL;Acc:O62289]
WBGene00001035	dnj-17	1335.52	-1.50129	0.500892	-2.99724	0.00272435	0.0401635	DNaJ domain (Prokaryotic heat shock protein) [Source:UniProtKB/TrEMBL;Acc:O62360]
WBGene00010745	dod-17	594.745	1.10593	0.368858	2.99827	0.0027152	0.0401635	Downstream Of DAF-16 (Regulated by DAF-16) [Source:UniProtKB/TrEMBL;Acc:O45667]
WBGene00016177	C28C12.1	53.29	-1.51444	0.50518	-2.99782	0.00271916	0.0401635
WBGene00016914	C54D1.7	180.927	1.09573	0.365572	2.99729	0.00272393	0.0401635
WBGene00194793	W04G3.13	30.8146	1.4829	0.494683	2.99768	0.00272044	0.0401635
WBGene00012117	T28B11.1	4098.63	-1.2491	0.41681	-2.99681	0.00272821	0.0401846
WBGene00001392	far-8	2786.56	0.67289	0.224566	2.9964	0.00273192	0.0402035	Fatty Acid/Retinol binding protein [Source:UniProtKB/TrEMBL;Acc:Q21152]
WBGene00009981	F53F1.3	1066.08	0.51976	0.173493	2.99586	0.00273671	0.0402381
WBGene00018516	tag-257	475.995	-0.733587	0.244921	-2.99521	0.0027426	0.0402889
WBGene00004166	pqn-85	3609.02	-0.792602	0.264722	-2.99409	0.00275265	0.0404008	Nipped-B-like protein pqn-85 [Source:UniProtKB/Swiss-Prot;Acc:Q95XZ5]
WBGene00017160	F01F1.3	245.406	0.699213	0.233665	2.99238	0.00276811	0.0405916
WBGene00006646	tsp-20	131.388	0.665286	0.222364	2.99188	0.00277266	0.0406222	TetraSPanin family [Source:UniProtKB/TrEMBL;Acc:Q17441]
WBGene00000786	cpr-6	33749.2	0.813681	0.272028	2.99116	0.00277916	0.0406385	Cathepsin B-like cysteine proteinase 6 [Source:UniProtKB/Swiss-Prot;Acc:P43510]
WBGene00010402	H16D19.4	15.2079	-1.71928	0.574828	-2.99095	0.00278113	0.0406385
WBGene00015296	C01F1.1	2616.27	-1.28224	0.428707	-2.99095	0.00278113	0.0406385
WBGene00006726	ubl-5	1770.07	1.17225	0.392595	2.9859	0.00282741	0.0412066	Ubiquitin-like protein 5 [Source:UniProtKB/Swiss-Prot;Acc:P91302]
WBGene00011920	T22C1.11	402.241	-1.36616	0.457473	-2.98631	0.00282367	0.0412066
WBGene00019979	R09B5.11	268.423	0.804777	0.269526	2.9859	0.00282749	0.0412066	Facilitated glucose transporter homolog [Source:UniProtKB/Swiss-Prot;Acc:O44616]
WBGene00008748	yap-1	447.258	-1.1693	0.391805	-2.98439	0.00284147	0.0413739	Yes-associated protein homolog 1 [Source:UniProtKB/Swiss-Prot;Acc:Q19404]
WBGene00015937	C17H12.12	42.59	-1.98124	0.664224	-2.98279	0.00285637	0.0415543
WBGene00022609	ZC416.2	130.728	0.776309	0.260359	2.98169	0.00286665	0.0416672
WBGene00000055	acr-16	151.491	0.835759	0.280352	2.98111	0.00287207	0.0416727	Acetylcholine receptor subunit alpha-type acr-16 [Source:UniProtKB/Swiss-Prot;Acc:P48180]
WBGene00003249	mig-18	205.537	0.684424	0.229582	2.98117	0.00287145	0.0416727
WBGene00018200	btb-17	222.381	0.6564	0.220257	2.98015	0.0028811	0.0417501	BTB (Broad/complex/Tramtrack/Bric a brac) domain protein [Source:UniProtKB/TrEMBL;Acc:Q8ITZ2]
WBGene00020006	set-15	365.304	-0.600959	0.201682	-2.97974	0.00288497	0.0417501	SET (Trithorax/polycomb) domain containing [Source:UniProtKB/TrEMBL;Acc:Q9TYX6]
WBGene00020553	T19A5.1	3181.04	-1.12711	0.378244	-2.97984	0.00288397	0.0417501
WBGene00008502	skih-2	1327.8	-1.20946	0.406201	-2.9775	0.00290607	0.0420187	SKI (Yeast SuperKIller) Helicase homolog [Source:UniProtKB/TrEMBL;Acc:Q19103]
WBGene00008988	F20G2.5	130.361	0.981673	0.329736	2.97715	0.00290942	0.0420304
WBGene00009384	piit-1	196.352	1.09079	0.366604	2.97539	0.00292612	0.0422347	Protease Inhibitor I2 (Two) [Source:UniProtKB/TrEMBL;Acc:Q20008]
WBGene00006975	zfp-1	3488.63	-1.10538	0.371719	-2.9737	0.0029423	0.042361	isoform a [Source:UniProtKB/Swiss-Prot;Acc:P34447]
WBGene00194651	C33D9.13	527.103	-1.02384	0.344291	-2.97376	0.00294179	0.042361
WBGene00219700	linc-6	91.2973	-1.54015	0.517929	-2.97368	0.00294256	0.042361	NA
WBGene00001493	frm-7	1874.94	-0.840104	0.282665	-2.97209	0.00295781	0.0425436	FERM domain (Protein4.1-ezrin-radixin-moesin) family [Source:UniProtKB/TrEMBL;Acc:Q9XXK4]
WBGene00007928	C34C12.9	87.4821	0.932431	0.314212	2.96752	0.00300214	0.0431123
WBGene00015807	C16A3.2	566.055	-0.89591	0.30191	-2.96748	0.00300256	0.0431123
WBGene00012404	Y6G8.2	125.482	-1.1483	0.387057	-2.96675	0.00300969	0.0431772
WBGene00005292	srh-71	12.1845	-1.54822	0.522232	-2.96462	0.00303053	0.043371	Serpentine Receptor, class H [Source:UniProtKB/TrEMBL;Acc:Q9TZF4]
WBGene00007200	vamp-8	217.982	0.691468	0.233244	2.96457	0.00303106	0.043371	VAMP (Vesicle Associated Membrane Protein) homolog [Source:UniProtKB/TrEMBL;Acc:Q95QZ1]
WBGene00022227	Y73B3B.5	172.756	-0.903974	0.30492	-2.96463	0.00303051	0.043371
WBGene00001974	hmg-4	5340.14	-1.30607	0.440658	-2.9639	0.00303767	0.043428	FACT complex subunit SSRP1-A [Source:UniProtKB/Swiss-Prot;Acc:P41848]
WBGene00021492	comt-5	184.131	0.896216	0.302481	2.96288	0.00304776	0.0435346	Catechol-O-MethylTransferase family [Source:UniProtKB/TrEMBL;Acc:Q8WTM3]
WBGene00005832	srw-85	399.642	-1.05824	0.357302	-2.96176	0.00305886	0.0436554	Serpentine Receptor, class W [Source:UniProtKB/TrEMBL;Acc:O62077]
WBGene00009178	uggt-2	47.0346	-1.48236	0.500578	-2.9613	0.00306344	0.0436831	UDP-Glucose Glycoprotein glucosylTransferase [Source:UniProtKB/TrEMBL;Acc:G5EF14]
WBGene00004244	puf-8	2864.33	-1.1897	0.40191	-2.96012	0.00307517	0.0438125	PUF (Pumilio/FBF) domain-containing [Source:UniProtKB/TrEMBL;Acc:Q09487]
WBGene00003237	mif-4	42.5077	0.949788	0.321155	2.95742	0.00310229	0.0441609	MIF (Macrophage migration Inhibitory Factor) related [Source:UniProtKB/TrEMBL;Acc:Q9GUG4]
WBGene00000096	ahr-1	24.1314	-1.83042	0.619457	-2.95488	0.00312787	0.0444759	Aryl hydrocarbon receptor protein 1 [Source:UniProtKB/Swiss-Prot;Acc:O44712]
WBGene00022801	pcp-5	2223.4	0.645704	0.218535	2.95469	0.0031298	0.0444759	Prolyl carboxy peptidase like protein 5 [Source:UniProtKB/Swiss-Prot;Acc:P34676]
WBGene00006570	tig-2	242.252	0.673591	0.228003	2.95431	0.00313366	0.0444926	TransformIng Growth factor beta family [Source:UniProtKB/TrEMBL;Acc:O16273]
WBGene00012499	Y24F12A.4	79.7477	-1.60955	0.544916	-2.95375	0.00313941	0.0444978
WBGene00022244	Y73B6BL.23	2327.47	-0.857516	0.290301	-2.95389	0.00313796	0.0444978
WBGene00012368	fbxa-93	168.613	-0.705291	0.238804	-2.95343	0.0031426	0.0445049
WBGene00020901	T28F2.2	385.435	0.54906	0.185946	2.95279	0.00314914	0.0445594
WBGene00012739	Y40B1B.7	2548.83	-0.521125	0.176516	-2.95228	0.00315439	0.0445956
WBGene00006364	syd-2	585.177	-0.693605	0.234995	-2.95158	0.00316157	0.0446207	Liprin-alpha [Source:UniProtKB/Swiss-Prot;Acc:Q21049]
WBGene00022970	CD4.10	212.788	-1.38293	0.468537	-2.95159	0.0031614	0.0446207
WBGene00019641	K10G6.4	20.1421	-1.93819	0.656777	-2.95106	0.00316688	0.0446575
WBGene00014955	Y102A5C.6	1660.71	-1.04764	0.35507	-2.95053	0.0031723	0.0446959
WBGene00000458	ceh-37	641.211	0.592389	0.200862	2.94924	0.00318557	0.0448448	Homeobox protein ceh-37 [Source:UniProtKB/Swiss-Prot;Acc:Q93356]
WBGene00016566	eri-7	1091.98	-1.4278	0.484298	-2.94818	0.00319654	0.0449608	Enhanced RNAI (RNA interference) [Source:UniProtKB/TrEMBL;Acc:O01976]
WBGene00018435	btb-9	303.3	0.855544	0.290239	2.94772	0.00320123	0.0449775	BTB (Broad/complex/Tramtrack/Bric a brac) domain protein [Source:UniProtKB/TrEMBL;Acc:O16746]
WBGene00077757	E02H4.7	333.194	0.995348	0.337688	2.94754	0.00320316	0.0449775
WBGene00015310	fan-1	1232.93	-1.23817	0.420223	-2.94645	0.00321442	0.0450973	Fanconi-associated nuclease 1 homolog [Source:UniProtKB/Swiss-Prot;Acc:P90740]
WBGene00017797	symk-1	1055.82	-1.13882	0.386565	-2.946	0.00321916	0.0451256	SYMpleKin cleavage and polyadenylation factor [Source:UniProtKB/TrEMBL;Acc:O16929]
WBGene00002268	lec-5	6978.63	0.922148	0.313066	2.94554	0.00322396	0.0451546	Galectin [Source:UniProtKB/TrEMBL;Acc:G5EFI4]
WBGene00019727	zig-12	3818.33	0.808688	0.274607	2.94489	0.00323068	0.0451948	2 (Zwei) IG domain protein [Source:UniProtKB/TrEMBL;Acc:Q21465]
WBGene00044242	C54C8.12	530.543	1.53498	0.521261	2.94474	0.0032323	0.0451948
WBGene00017288	F09E5.10	107.27	-1.26313	0.428996	-2.94439	0.00323587	0.0452065
WBGene00005188	srg-31	84.2986	0.913665	0.310478	2.94277	0.00325287	0.0453673	Serpentine receptor class gamma-31 [Source:UniProtKB/Swiss-Prot;Acc:O61892]
WBGene00009337	uig-1	501.005	-0.825858	0.280617	-2.94301	0.00325042	0.0453673	UNC-112-Interacting Guanine nucleotide exchange factor [Source:UniProtKB/TrEMBL;Acc:D4YWB9]
WBGene00002231	knl-1	3077.13	-1.35188	0.459677	-2.94094	0.0032722	0.0455986	Kinetochore null protein 1 [Source:UniProtKB/Swiss-Prot;Acc:P34278]
WBGene00018473	cima-1	360.756	0.689309	0.234512	2.93934	0.00328916	0.0457963
WBGene00003949	pbs-3	8412.21	0.734204	0.249987	2.93697	0.0033144	0.0460939	Proteasome subunit beta type-3 [Source:UniProtKB/Swiss-Prot;Acc:Q23237]
WBGene00010284	aman-2	3279.26	-0.914536	0.311405	-2.93681	0.00331611	0.0460939	Alpha-mannosidase [Source:UniProtKB/TrEMBL;Acc:Q2PJ74]
WBGene00018853	sec-22	1150.65	0.623543	0.212411	2.93555	0.00332953	0.0462416	Yeast SEC homolog [Source:UniProtKB/TrEMBL;Acc:Q94241]
WBGene00004333	rec-8	1708.48	-1.20976	0.412185	-2.93499	0.00333557	0.0462478	Meiotic recombination protein rec-8 [Source:UniProtKB/Swiss-Prot;Acc:Q9XUB3]
WBGene00008358	nspc-18	639.785	0.930583	0.317055	2.93508	0.00333463	0.0462478	Nematode Specific Peptide family, group C [Source:UniProtKB/TrEMBL;Acc:Q8MQ91]
WBGene00004855	sma-1	3350.79	-0.882877	0.300988	-2.93326	0.00335425	0.0464289	Beta chain spectrin homolog Sma1; SMAll [Source:UniProtKB/TrEMBL;Acc:G5EC35]
WBGene00016248	C30B5.7	54.2412	0.91456	0.311776	2.93339	0.00335281	0.0464289
WBGene00011353	T01H8.2	415.585	0.586586	0.200085	2.93169	0.00337125	0.0465581
WBGene00011705	T11A5.6	110.218	-1.03529	0.353146	-2.93162	0.00337202	0.0465581
WBGene00017362	F10G2.1	1789.52	0.633052	0.215928	2.93178	0.00337024	0.0465581	UPF0376 protein F10G2.1 [Source:UniProtKB/Swiss-Prot;Acc:Q22957]
WBGene00017269	F08F8.4	1279.69	-1.31145	0.447587	-2.93005	0.0033891	0.0467303
WBGene00020235	T05A12.4	513.08	-1.0132	0.345807	-2.92995	0.00339014	0.0467303
WBGene00008695	F11C3.1	34.0229	-1.17443	0.400927	-2.9293	0.00339725	0.0467504	ATP-dependent DNA helicase [Source:UniProtKB/TrEMBL;Acc:O02243]
WBGene00019432	knl-2	2378.21	-1.5269	0.521234	-2.9294	0.00339614	0.0467504	Kinetochore null protein 2 [Source:UniProtKB/Swiss-Prot;Acc:O44548]
WBGene00001366	exc-5	411.678	-0.686653	0.234559	-2.92742	0.00341784	0.0469389	Putative Rho guanine nucleotide exchange factor FGD-1 [Source:UniProtKB/TrEMBL;Acc:G5ED03]
WBGene00011397	T03E6.8	140.568	-1.01148	0.345512	-2.92748	0.00341716	0.0469389
WBGene00013393	Y62H9A.5	38197.6	1.08182	0.369565	2.92728	0.00341946	0.0469389
WBGene00006723	ubh-3	2844	0.545495	0.186395	2.92655	0.00342746	0.0470004	Ubiquitin carboxyl-terminal hydrolase [Source:UniProtKB/TrEMBL;Acc:Q965V9]
WBGene00007912	C34B7.2	985.214	-1.41135	0.482288	-2.92635	0.00342963	0.0470004
WBGene00045297	fbxc-43	46.1951	-0.89019	0.304308	-2.92529	0.00344136	0.0471221	F-box C protein [Source:UniProtKB/TrEMBL;Acc:A3KFE7]
WBGene00008777	F13H10.6	1068.64	1.13425	0.387875	2.92425	0.00345282	0.0472399
WBGene00013020	Y48G10A.3	1448.14	0.95326	0.326052	2.92365	0.00345957	0.0472541
WBGene00020507	vha-15	5699.14	0.46412	0.158741	2.92376	0.00345835	0.0472541	Probable V-type proton ATPase subunit H 2 [Source:UniProtKB/Swiss-Prot;Acc:Q22494]
WBGene00001651	gon-2	1299.64	-0.753917	0.25805	-2.92159	0.00348246	0.0475275	Transient receptor potential channel [Source:UniProtKB/Swiss-Prot;Acc:Q93971]
WBGene00010460	clec-142	22.4081	-1.91029	0.653983	-2.92101	0.00348899	0.0475774	C-type LECtin [Source:UniProtKB/TrEMBL;Acc:Q21085]
WBGene00001017	dnc-1	3445.23	-0.96945	0.332058	-2.91952	0.00350574	0.0477665	DyNactin Complex component [Source:UniProtKB/TrEMBL;Acc:E2JKY8]
WBGene00000929	dao-3	2432.58	0.502698	0.172222	2.91889	0.00351286	0.0478006	Dauer or Aging adult Overexpression [Source:UniProtKB/TrEMBL;Acc:Q21285]
WBGene00007392	fbxa-156	104.701	0.706485	0.242055	2.9187	0.00351497	0.0478006	F-box A protein [Source:UniProtKB/TrEMBL;Acc:O17577]
WBGene00020349	T08B2.11	198.855	-1.72676	0.591655	-2.91852	0.00351696	0.0478006
WBGene00022853	ZK1127.6	475.701	-0.792803	0.271669	-2.91827	0.0035198	0.0478006
WBGene00044206	T26H5.9	4001.87	0.926482	0.317587	2.91725	0.0035313	0.0479173
WBGene00022741	ZK430.5	184.079	-1.45036	0.497395	-2.91591	0.00354651	0.0480842
WBGene00017078	D2096.11	16.0546	-1.69106	0.580196	-2.91463	0.00356112	0.0482428
WBGene00010100	F55C9.3	16.7027	-1.48884	0.511025	-2.91344	0.0035747	0.0483871
WBGene00001494	frm-8	442.1	0.683205	0.234673	2.9113	0.00359925	0.0486796	FERM domain (Protein4.1-ezrin-radixin-moesin) family [Source:UniProtKB/TrEMBL;Acc:Q8ITW4]
WBGene00010878	M05D6.5	1679.87	0.691825	0.237767	2.90968	0.00361801	0.0488934
WBGene00019829	R02E12.5	52.2	1.21502	0.417614	2.90942	0.00362096	0.0488934
WBGene00011070	msrp-7	319.873	0.993841	0.341798	2.90768	0.00364118	0.0491262	MS Related Protein [Source:RefSeq peptide;Acc:NP_496327]
WBGene00009902	drd-1	723.729	0.856772	0.294813	2.90615	0.00365904	0.0493269	Dietary restriction down regulated [Source:UniProtKB/TrEMBL;Acc:A5JYS2]
WBGene00004955	spd-5	4445.83	-1.68157	0.578703	-2.90577	0.00366356	0.0493477	Spindle-defective protein 5 [Source:UniProtKB/Swiss-Prot;Acc:P91349]
WBGene00255596	Y37B11A.8	263.551	-1.10809	0.381425	-2.90512	0.00367113	0.0494094
WBGene00016971	toe-2	1739.13	-1.36636	0.470417	-2.90457	0.00367754	0.0494555	Target Of ERK kinase MPK-1 [Source:UniProtKB/TrEMBL;Acc:Q65ZJ1]
WBGene00017621	F20A1.10	1146.15	0.755734	0.260307	2.90324	0.00369322	0.0496259
WBGene00021037	fbxa-203	98.6751	-1.15241	0.397123	-2.90189	0.00370921	0.0498004
WBGene00008206	set-6	295.419	-0.911851	0.31434	-2.90085	0.00372157	0.0499258	SET (Trithorax/polycomb) domain containing [Source:UniProtKB/TrEMBL;Acc:O17679]
WBGene00013301	Y57G11C.3	3796.18	0.520484	0.179458	2.90031	0.00372798	0.0499712	Putative 6-phosphogluconolactonase [Source:UniProtKB/Swiss-Prot;Acc:O18229]
WBGene00004508	rrf-1	1434.55	-1.0876	0.375086	-2.89959	0.00373649	0.0500088	RNA-dependent RNA polymerase Family; RRF-1 [Source:UniProtKB/TrEMBL;Acc:G5ECM1]
WBGene00012928	aakb-2	1127.08	0.800469	0.276089	2.89931	0.00373985	0.0500088	AMP-Activated Kinase Beta subunit [Source:UniProtKB/TrEMBL;Acc:Q9NAH7]
WBGene00020259	T05E7.3	1051.81	-1.53263	0.528575	-2.89955	0.00373693	0.0500088
WBGene00012474	attf-6	1820.48	-1.09437	0.377537	-2.8987	0.00374713	0.0500253	AT hook Transcription Factor family [Source:UniProtKB/TrEMBL;Acc:Q9XW25]
WBGene00021170	arx-4	3750.43	0.583993	0.201459	2.89881	0.0037458	0.0500253	Probable actin-related protein 2/3 complex subunit 2 [Source:UniProtKB/Swiss-Prot;Acc:Q8WTM6]
WBGene00003902	pab-1	71402.1	-0.57322	0.197779	-2.89828	0.00375215	0.0500519	Polyadenylate-binding protein [Source:UniProtKB/TrEMBL;Acc:Q7K798]
WBGene00044742	Y55F3BR.10	67.6246	-1.7527	0.604816	-2.89791	0.00375664	0.0500714
WBGene00019799	M151.7	380.779	-1.04307	0.359971	-2.89764	0.00375983	0.0500735
WBGene00010567	K04G2.9	644.159	0.715512	0.246968	2.89718	0.0037653	0.050106
WBGene00003884	osm-3	125.337	-0.795335	0.274554	-2.89682	0.00376964	0.0501235	Osmotic avoidance abnormal protein 3 [Source:UniProtKB/Swiss-Prot;Acc:P46873]
WBGene00000180	arc-1	727.092	0.697945	0.241109	2.89472	0.00379493	0.0504192	E3 ubiquitin-protein ligase arc-1 [Source:UniProtKB/Swiss-Prot;Acc:Q09654]
WBGene00022445	Y110A2AL.9	564.233	1.03179	0.356633	2.89313	0.00381418	0.0506343
WBGene00000235	baf-1	12948.7	0.930466	0.321688	2.89245	0.00382246	0.0507036	Barrier-to-autointegration factor 1 [Source:UniProtKB/Swiss-Prot;Acc:Q03565]
WBGene00001869	him-10	1998.88	-1.36458	0.47203	-2.89087	0.00384178	0.0507968	Kinetochore protein Nuf2 homolog [Source:UniProtKB/Swiss-Prot;Acc:Q21952]
WBGene00015793	C15C7.7	606.935	0.633377	0.219052	2.89145	0.00383468	0.0507968	GDP-fucose protein O-fucosyltransferase 1 [Source:UniProtKB/Swiss-Prot;Acc:Q18014]
WBGene00020404	T10B11.8	541.465	-1.29214	0.446942	-2.89107	0.00383929	0.0507968
WBGene00023477	nspc-1	104.698	1.05653	0.365433	2.89117	0.00383814	0.0507968	Nematode Specific Peptide family, group C [Source:UniProtKB/TrEMBL;Acc:Q65ZI6]
WBGene00019627	K10D2.1	1517.06	-1.13195	0.391723	-2.88966	0.00385657	0.0509435	Protein HIRA homolog [Source:UniProtKB/Swiss-Prot;Acc:Q09589]
WBGene00020152	nhr-211	127.809	0.778703	0.269498	2.88946	0.00385903	0.0509435	Nuclear Hormone Receptor family [Source:UniProtKB/TrEMBL;Acc:O16965]
WBGene00001005	dlc-1	17121.5	1.11552	0.386577	2.88563	0.00390629	0.0512841	Dynein light chain 1, cytoplasmic [Source:UniProtKB/Swiss-Prot;Acc:Q22799]
WBGene00001082	dpy-23	2128.36	0.46531	0.161261	2.88545	0.0039085	0.0512841	AP-2 complex subunit mu [Source:UniProtKB/Swiss-Prot;Acc:P35603]
WBGene00010077	F55A11.4	810.15	-0.823657	0.28534	-2.88658	0.00389451	0.0512841	Putative calcium-binding mitochondrial carrier F55A11.4 [Source:UniProtKB/Swiss-Prot;Acc:Q20799]
WBGene00016920	C54E4.5	703.303	0.942114	0.326331	2.88699	0.00388943	0.0512841
WBGene00017606	ets-6	1421.41	-1.4008	0.485486	-2.88536	0.00390964	0.0512841	ETS class transcription factor [Source:UniProtKB/TrEMBL;Acc:O01525]
WBGene00021965	Y57G7A.1	520.461	1.01165	0.350468	2.88656	0.00389476	0.0512841
WBGene00050920	Y54H5A.5	24.0276	-1.72264	0.596963	-2.88567	0.00390585	0.0512841
WBGene00194683	T20G5.15	125.383	-1.12371	0.389324	-2.88633	0.00389769	0.0512841
WBGene00007588	C14C10.5	5479.6	-0.659272	0.228515	-2.88503	0.00391381	0.0512982
WBGene00000857	cwn-1	814.817	0.726814	0.251987	2.88433	0.0039225	0.0513612
WBGene00011229	R11.4	561.291	0.977527	0.338958	2.88392	0.00392762	0.0513612
WBGene00019959	R08E3.3	903.866	-1.1469	0.397691	-2.88389	0.00392793	0.0513612
WBGene00044094	fitm-2	2535.43	0.614082	0.213085	2.88187	0.00395324	0.0516513	FIT family protein fitm-2 [Source:UniProtKB/Swiss-Prot;Acc:Q5CZ37]
WBGene00013111	sta-1	388.49	0.556284	0.19305	2.88155	0.0039573	0.0516635	Signal transducer and activator of transcription 1 [Source:UniProtKB/Swiss-Prot;Acc:Q9NAD6]
WBGene00001154	ech-5	1487.71	0.68739	0.238639	2.88046	0.00397093	0.0518006	Enoyl-CoA Hydratase [Source:UniProtKB/TrEMBL;Acc:O45106]
WBGene00013009	fbxc-23	128.441	0.762466	0.264803	2.87937	0.00398473	0.0519396	F-box C protein [Source:UniProtKB/TrEMBL;Acc:O18201]
WBGene00008298	C54D10.3	1246.38	-0.799525	0.277698	-2.87912	0.00398787	0.0519397
WBGene00015811	C16A3.6	4057.5	-1.19918	0.416547	-2.87886	0.0039912	0.0519421	Protein MAK16 homolog [Source:UniProtKB/TrEMBL;Acc:Q18035]
WBGene00019064	myo-5	417.811	-1.28061	0.445153	-2.87678	0.00401756	0.0522441	MYOsin heavy chain structural genes [Source:UniProtKB/TrEMBL;Acc:Q21000]
WBGene00014852	W02A11.6	53.7972	-1.15313	0.400881	-2.87649	0.00402125	0.052251
WBGene00007154	dhc-3	26.9418	-1.43113	0.497588	-2.87613	0.00402584	0.0522695	Dynein Heavy Chain [Source:UniProtKB/TrEMBL;Acc:G5EDV4]
WBGene00007412	stip-1	1799.67	-1.02347	0.356027	-2.87471	0.00404404	0.0524425	Septin and tuftelin-interacting protein 1 homolog [Source:UniProtKB/Swiss-Prot;Acc:Q17784]
WBGene00019248	H27M09.5	29.8951	-1.63657	0.569322	-2.87459	0.0040455	0.0524425
WBGene00011184	R09H10.7	70.1472	1.31743	0.458429	2.8738	0.0040557	0.0525335
WBGene00007304	ttr-39	157.816	0.881429	0.306741	2.87353	0.00405909	0.0525363	TransThyretin-Related family domain [Source:UniProtKB/TrEMBL;Acc:H2L2B1]
WBGene00002109	ins-26	96.8742	1.45383	0.506175	2.87218	0.00407647	0.05272	INSulin related [Source:UniProtKB/TrEMBL;Acc:Q9XUI9]
WBGene00016038	cst-2	11.3268	-1.52403	0.530755	-2.87143	0.00408619	0.0527974	Caenorhabditis STE20-like kinase [Source:UniProtKB/TrEMBL;Acc:Q304D8]
WBGene00044988	W01A8.8	175.324	0.78618	0.273813	2.87123	0.00408883	0.0527974
WBGene00006814	unc-82	624.967	-0.792398	0.27604	-2.87059	0.00409701	0.0528257
WBGene00011331	T01E8.1	504.96	0.633955	0.220876	2.87018	0.00410238	0.0528257
WBGene00013345	Y59A8B.8	678.975	0.599575	0.2089	2.87015	0.00410275	0.0528257
WBGene00018700	lmd-3	4937.01	-1.15119	0.401103	-2.87007	0.0041038	0.0528257	LysM Domain (Peptidoglycan binding) protein [Source:UniProtKB/TrEMBL;Acc:H2L004]
WBGene00018511	F46F11.8	1281.26	-1.55459	0.541754	-2.86955	0.00411063	0.0528724
WBGene00001771	gst-23	37.9065	1.20419	0.419689	2.86925	0.00411446	0.0528806	Glutathione S-Transferase [Source:UniProtKB/TrEMBL;Acc:P91505]
WBGene00018350	ifo-1	618.615	-0.843696	0.294085	-2.86888	0.00411923	0.0529008	Intermediate Filament Organize [Source:UniProtKB/TrEMBL;Acc:Q20330]
WBGene00008341	ttr-44	3137.43	0.674445	0.235134	2.86834	0.00412626	0.0529356	TransThyretin-Related family domain [Source:UniProtKB/TrEMBL;Acc:E3W741]
WBGene00012381	Y2H9A.4	63.9136	-1.01616	0.354285	-2.86818	0.00412834	0.0529356
WBGene00044166	C54C6.7	196.863	1.1506	0.401254	2.86749	0.00413736	0.0530101
WBGene00219575	anr-8	68.0102	-1.06444	0.371245	-2.86722	0.00414094	0.0530149
WBGene00006595	top-1	8569.79	-1.47326	0.513993	-2.86631	0.00415291	0.053045	DNA topoisomerase 1 [Source:UniProtKB/Swiss-Prot;Acc:O17966]
WBGene00013098	Y51H4A.1	56.7927	-1.30983	0.456958	-2.8664	0.00415163	0.053045
WBGene00077525	C41G7.8	354.191	0.808236	0.281966	2.86643	0.00415125	0.053045
WBGene00011648	cni-1	1471.54	0.567973	0.19827	2.86464	0.00417479	0.0532833	Protein cornichon homolog 1 [Source:UniProtKB/Swiss-Prot;Acc:Q22361]
WBGene00010188	F57B1.5	153.408	0.884173	0.30878	2.86344	0.00419068	0.053445
WBGene00017062	glrx-3	4616.17	0.67031	0.234267	2.86131	0.00421893	0.0537637	GLutaRedoXin [Source:UniProtKB/TrEMBL;Acc:Q6EZG4]
WBGene00015057	gad-3	465.611	-1.3101	0.457924	-2.86096	0.00422355	0.0537812	Probable aldehyde oxidase gad-3 [Source:UniProtKB/Swiss-Prot;Acc:Q960A1]
WBGene00015390	C03F11.4	129.121	-0.84875	0.296985	-2.85789	0.00426475	0.054264
WBGene00009051	nduf-6	3663.29	0.846124	0.296104	2.85752	0.00426968	0.0542849	Probable NADH dehydrogenase [ubiquinone] iron-sulfur protein 6, mitochondrial [Source:UniProtKB/Swiss-Prot;Acc:Q19724]
WBGene00019491	K07E3.2	493.769	-1.01479	0.355335	-2.85586	0.00429201	0.0545269
WBGene00009049	F22B8.7	1644.59	0.553084	0.193767	2.85439	0.00431202	0.0546553
WBGene00043097	C02D5.4	2398.45	0.741508	0.259762	2.85456	0.0043096	0.0546553
WBGene00175031	C06C3.12	11.5157	-2.06268	0.722598	-2.85454	0.00430998	0.0546553
WBGene00004789	sgk-1	1011.89	0.539425	0.189048	2.85338	0.00432564	0.054785	Serine/threonine-protein kinase sgk-1 [Source:UniProtKB/Swiss-Prot;Acc:Q2PJ68]
WBGene00016565	C41D11.6	48.0248	-1.40045	0.490846	-2.85315	0.00432888	0.054785
WBGene00016974	lron-15	59.3203	-0.842109	0.295278	-2.85192	0.00434559	0.0549544	ELRR (Extracellular Leucine-Rich Repeat) ONly [Source:UniProtKB/TrEMBL;Acc:Q18902]
WBGene00001214	ego-1	1350.47	-1.05841	0.371221	-2.85115	0.00435618	0.0549638	Enhancer of Glp-One (Glp-1); RNA-directed RNA polymerase related EGO-1 [Source:UniProtKB/TrEMBL;Acc:G5EBQ3]
WBGene00009098	ehbp-1	1969.66	-1.07488	0.376995	-2.85119	0.00435563	0.0549638	EH (Eps-15-homology) domain Binding Protein family [Source:UniProtKB/TrEMBL;Acc:G5ECW3]
WBGene00021132	nfyb-1	915.416	-1.16827	0.409755	-2.85114	0.0043563	0.0549638	Nuclear transcription Factor Y, B (Beta) subunit [Source:UniProtKB/TrEMBL;Acc:O17286]
WBGene00001535	gcy-8	60.0481	-1.15341	0.404692	-2.85009	0.00437072	0.055033	Receptor-type guanylate cyclase gcy-8 [Source:UniProtKB/Swiss-Prot;Acc:Q9GYQ4]
WBGene00007440	C08E8.4	1753.14	0.813243	0.285347	2.85001	0.00437177	0.055033
WBGene00012122	T28C6.8	644.068	0.845403	0.296593	2.85038	0.00436668	0.055033
WBGene00001749	gst-1	8062.7	0.716927	0.251633	2.8491	0.00438433	0.0551492	Glutathione S-transferase P [Source:UniProtKB/Swiss-Prot;Acc:P10299]
WBGene00021877	Y54G2A.12	478.988	-1.39665	0.490271	-2.84872	0.00438952	0.0551726
WBGene00013081	Y51A2D.14	1052.58	1.58572	0.556711	2.84838	0.00439428	0.0551904
WBGene00002061	ife-3	12587.1	0.760997	0.267224	2.84779	0.0044024	0.0552505	Eukaryotic translation initiation factor 4E-3 [Source:UniProtKB/Swiss-Prot;Acc:O61955]
WBGene00018946	F56C3.9	284.084	0.882445	0.309992	2.84667	0.00441791	0.0554031
WBGene00003636	nhr-46	2409.09	0.437573	0.153761	2.8458	0.00442995	0.0555119	Nuclear Hormone Receptor family [Source:UniProtKB/TrEMBL;Acc:Q95QR3]
WBGene00007870	C32H11.7	23.0253	-1.20745	0.424485	-2.84449	0.00444821	0.0556985
WBGene00011629	T08G11.1	5572.73	-1.06645	0.374991	-2.84394	0.00445597	0.0557536
WBGene00002220	gcc-1	519.443	-0.800414	0.281519	-2.8432	0.0044663	0.0558406	Grip (GRIP) and Coiled-Coil domain containing protein related [Source:UniProtKB/TrEMBL;Acc:Q18013]
WBGene00000239	bas-1	637.496	0.720843	0.253561	2.84287	0.0044709	0.0558415	Biogenic Amine Synthesis related [Source:UniProtKB/TrEMBL;Acc:O45137]
WBGene00011446	T04F8.8	4162.25	0.977751	0.34395	2.84271	0.00447313	0.0558415
WBGene00003019	lin-33	1144.65	0.617569	0.217325	2.84168	0.00448764	0.0558642
WBGene00008925	F17H10.1	1204.98	0.366042	0.128815	2.84162	0.00448846	0.0558642
WBGene00016432	C35B1.2	1131.85	-0.831697	0.292675	-2.84171	0.00448727	0.0558642
WBGene00018214	F39H12.3	488.434	0.733065	0.257937	2.84203	0.00448271	0.0558642
WBGene00001841	hen-1	304.185	1.28927	0.453832	2.84084	0.00449945	0.0559589	HEN-1; HEsitatioN behavior [Source:UniProtKB/TrEMBL;Acc:G5ECA8]
WBGene00011747	sna-2	2431.86	-1.42785	0.502679	-2.84048	0.00450451	0.0559798	Small Nuclear RNA (snRNA) Associated protein [Source:UniProtKB/TrEMBL;Acc:Q94050]
WBGene00018102	math-28	24.8957	-1.1222	0.395127	-2.84009	0.00451003	0.0560063	MATH (Meprin-associated Traf homology) domain containing [Source:UniProtKB/TrEMBL;Acc:Q2L6V3]
WBGene00000199	arx-1	4805.19	0.485633	0.171145	2.83755	0.00454609	0.0561943	Actin-related protein 3 [Source:UniProtKB/Swiss-Prot;Acc:Q9N4I0]
WBGene00003038	lin-56	459.48	-1.10994	0.390996	-2.83875	0.004529	0.0561943
WBGene00008032	C39E9.8	4048.67	0.806112	0.284107	2.83735	0.00454895	0.0561943
WBGene00009186	trcs-1	8951.41	-1.32697	0.467485	-2.83853	0.00453217	0.0561943	TRansport of membrane to Cell Surface [Source:UniProtKB/TrEMBL;Acc:Q19839]
WBGene00011444	T04F8.6	508.161	-0.722826	0.254739	-2.83752	0.00454656	0.0561943
WBGene00013784	Y116A8C.3	297.414	0.940475	0.331382	2.83804	0.00453913	0.0561943
WBGene00014004	fic-1	983.723	-1.34928	0.475523	-2.83746	0.00454743	0.0561943	Adenosine monophosphate-protein transferase FICD homolog [Source:UniProtKB/Swiss-Prot;Acc:Q23544]
WBGene00009166	F26F2.1	29.3504	-1.52187	0.536523	-2.83655	0.00456034	0.056293
WBGene00013325	Y57G11C.36	848.816	-0.703904	0.248187	-2.83619	0.00456553	0.056315
WBGene00006635	tsp-9	818.424	0.664295	0.234305	2.83517	0.00458009	0.0564525	Tetraspanin [Source:UniProtKB/TrEMBL;Acc:Q18177]
WBGene00018439	fbxa-184	21.3646	-1.75198	0.618038	-2.83475	0.0045862	0.0564858	F-box A protein [Source:UniProtKB/TrEMBL;Acc:O16739]
WBGene00001134	eat-3	2178.35	-1.03189	0.364078	-2.83426	0.00459315	0.0565292
WBGene00016888	C52E12.1	2534.49	-1.189	0.420045	-2.83066	0.00464526	0.0570453
WBGene00022379	Y94H6A.7	329.124	1.32089	0.466638	2.83064	0.00464543	0.0570453
WBGene00220172	Y49E10.36	27.9745	-1.66366	0.587719	-2.8307	0.00464464	0.0570453
WBGene00000285	cal-1	255.375	0.766328	0.270807	2.8298	0.00465776	0.0571544	Calmodulin-like protein [Source:UniProtKB/Swiss-Prot;Acc:P04630]
WBGene00001247	elo-9	280.963	0.779831	0.27575	2.82804	0.00468343	0.0574267	Elongation of very long chain fatty acids protein [Source:UniProtKB/TrEMBL;Acc:Q9NAC6]
WBGene00004196	prx-11	238.267	0.702648	0.248483	2.82775	0.00468765	0.0574304	PeRoXisome assembly factor [Source:UniProtKB/TrEMBL;Acc:O62103]
WBGene00017275	F08F8.10	1148.14	-1.06071	0.375135	-2.82754	0.00469067	0.0574304
WBGene00012915	lgc-35	55.8288	0.90109	0.318749	2.82696	0.00469925	0.057458	Ligand-Gated ion Channel [Source:UniProtKB/TrEMBL;Acc:Q8MPP4]
WBGene00020329	bath-26	205.669	0.611973	0.216481	2.82692	0.00469987	0.057458	BTB and MATH domain containing [Source:UniProtKB/TrEMBL;Acc:O76611]
WBGene00010122	F55G11.1	29.378	1.12882	0.399391	2.82636	0.00470799	0.0574779
WBGene00021511	Y41D4B.1	29.792	1.04619	0.370158	2.82633	0.00470845	0.0574779
WBGene00012604	nspe-2	76.2434	1.29935	0.459774	2.82607	0.00471226	0.057482	Nematode Specific Peptide family, group E [Source:UniProtKB/TrEMBL;Acc:Q7YWR0]
WBGene00012167	tofu-5	1846.21	-0.8859	0.313593	-2.825	0.00472809	0.0576325	Twenty One u-rna (21U-RNA) biogenesis Fouled Up [Source:UniProtKB/TrEMBL;Acc:Q23096]
WBGene00007419	C07E3.9	772.966	0.827345	0.293156	2.8222	0.00476961	0.058053	Phospholipase A(2) [Source:UniProtKB/TrEMBL;Acc:Q17790]
WBGene00010888	dlc-2	383.804	0.794744	0.281583	2.82241	0.00476637	0.058053	Probable dynein light chain 2, cytoplasmic [Source:UniProtKB/Swiss-Prot;Acc:Q21557]
WBGene00004801	sir-2.2	558.439	0.466356	0.165266	2.82185	0.00477474	0.0580728	NAD-dependent protein deacylase sir-2.2 [Source:UniProtKB/Swiss-Prot;Acc:Q20480]
WBGene00185117	C45B11.9	18.0684	-1.83502	0.650358	-2.82155	0.00477923	0.0580847
WBGene00001991	hot-6	124.158	0.859152	0.30465	2.82013	0.00480039	0.058228	Homolog of Odr-2 (Two); Ly-6-related protein HOT-6 [Source:UniProtKB/TrEMBL;Acc:G5EER8]
WBGene00003582	dcap-2	1660.18	-1.33912	0.474801	-2.82039	0.00479653	0.058228	mRNA-decapping enzyme 2 [Source:UniProtKB/Swiss-Prot;Acc:O62255]
WBGene00013348	fbxa-106	216.889	-0.805827	0.285749	-2.82005	0.00480158	0.058228	F-box A protein [Source:UniProtKB/TrEMBL;Acc:L8E967]
WBGene00019334	K02F3.12	1917.35	-1.15576	0.409888	-2.8197	0.00480681	0.0582487	Putative ATP-dependent DNA helicase Q1 [Source:UniProtKB/Swiss-Prot;Acc:Q9TXJ8]
WBGene00020642	T20H9.6	10.3656	-2.35082	0.833882	-2.81913	0.00481546	0.0583108
WBGene00007717	C25D7.5	655.56	0.74209	0.263419	2.81715	0.00484519	0.0586279
WBGene00013497	hex-5	190.605	0.771323	0.273827	2.81683	0.00485003	0.0586435	HEXosaminidase; Hexosaminidase [Source:UniProtKB/TrEMBL;Acc:G5EEC8]
WBGene00021161	Y4C6B.7	815.208	1.06839	0.379369	2.81623	0.00485907	0.0587099
WBGene00001085	dpy-26	2597.47	-1.23756	0.439881	-2.81341	0.00490197	0.0590071	Condensin complex subunit dpy-26 [Source:UniProtKB/Swiss-Prot;Acc:G5EGE9]
WBGene00003021	lin-36	2656.64	-1.29128	0.459005	-2.8132	0.00490507	0.0590071
WBGene00006468	rhgf-1	200.318	-1.03485	0.367785	-2.81374	0.00489692	0.0590071	RHo Guanine nucleotide exchange Factor [Source:UniProtKB/TrEMBL;Acc:G5EFE1]
WBGene00010018	fbxa-69	168.021	-0.778259	0.276558	-2.81409	0.00489158	0.0590071	F-box A protein [Source:UniProtKB/TrEMBL;Acc:O45561]
WBGene00019003	F57B10.5	2727.9	0.414211	0.147181	2.81429	0.00488844	0.0590071
WBGene00077692	C08E8.10	65.1253	0.993024	0.352967	2.81336	0.00490267	0.0590071
WBGene00010491	K02B7.3	1999.15	0.879746	0.312835	2.81217	0.00492078	0.0591531
WBGene00010063	dhrs-4	815.382	0.939382	0.33409	2.81177	0.00492702	0.059185	Dehydrogenase/reductase SDR family member 4 [Source:UniProtKB/Swiss-Prot;Acc:G5EGA6]
WBGene00002255	lbp-3	3149.34	0.537497	0.191317	2.80945	0.00496257	0.0594201	Fatty acid-binding protein homolog 3 [Source:UniProtKB/Swiss-Prot;Acc:Q20222]
WBGene00010623	K07A12.5	91.8004	-1.20569	0.429057	-2.81009	0.00495283	0.0594201
WBGene00017065	D2092.4	1195.03	0.668258	0.237819	2.80994	0.00495504	0.0594201
WBGene00017411	F13A2.2	119.756	-1.37388	0.489043	-2.80933	0.00496455	0.0594201
WBGene00220048	R106.6	32.5155	-1.00235	0.35679	-2.80935	0.00496417	0.0594201	NA
WBGene00016609	C43E11.12	854.198	-0.882839	0.314283	-2.80905	0.00496875	0.0594274
WBGene00004739	scd-1	1941.05	-0.567609	0.202107	-2.80845	0.00497803	0.0594524	Suppressor of Constitutive Dauer formation [Source:UniProtKB/TrEMBL;Acc:Q8MQ12]
WBGene00021351	eif-2alpha	10965.5	0.933859	0.332493	2.80866	0.00497482	0.0594524	Eukaryotic Initiation Factor [Source:UniProtKB/TrEMBL;Acc:Q9BKU3]
WBGene00011970	rlbp-1	1322.78	-1.20763	0.430211	-2.80707	0.00499939	0.0596214	RaL Binding Protein [Source:UniProtKB/TrEMBL;Acc:E2JL05]
WBGene00021589	Y46D2A.1	22.835	-1.38392	0.493009	-2.80709	0.00499917	0.0596214
WBGene00018161	F38A5.2	4849.8	0.71545	0.254952	2.80622	0.00501268	0.0597368
WBGene00008002	nlp-48	71.4965	1.18534	0.422594	2.80492	0.00503287	0.0599343	Neuropeptide-Like Protein [Source:UniProtKB/TrEMBL;Acc:Q7YX47]
WBGene00000186	ark-1	1395.65	-0.902951	0.321983	-2.80435	0.00504187	0.0599982	Ack-related non-receptor tyrosine kinase [Source:UniProtKB/Swiss-Prot;Acc:G5EBZ8]
WBGene00019532	K08D10.9	14.5708	-2.23095	0.795703	-2.80375	0.00505116	0.0600656
WBGene00019108	chpf-2	111.206	0.902276	0.321911	2.80287	0.00506501	0.0601438	Calcineurin-like EF-Hand Protein Family member [Source:UniProtKB/TrEMBL;Acc:O16343]
WBGene00219289	T05C12.15	20.6919	1.52596	0.544419	2.80291	0.00506432	0.0601438
WBGene00000998	dig-1	1011.61	-0.995955	0.355551	-2.80116	0.00509191	0.0603558	Mesocentin [Source:UniProtKB/Swiss-Prot;Acc:Q09165]
WBGene00004322	rcq-5	1102.97	-1.43715	0.513078	-2.80104	0.00509381	0.0603558	ReCQ DNA helicase family [Source:UniProtKB/TrEMBL;Acc:Q19046]
WBGene00019441	K06B9.4	94.96	-1.45472	0.519327	-2.80117	0.00509182	0.0603558
WBGene00006863	gyg-1	1908.67	0.76575	0.27354	2.79941	0.00511966	0.0606187	Glycogenin-1 [Source:UniProtKB/Swiss-Prot;Acc:H2KYQ5]
WBGene00007657	pals-3	17.4837	-1.97329	0.704997	-2.799	0.00512607	0.0606211	Protein containing ALS2cr12 (ALS2CR12) domain [Source:UniProtKB/TrEMBL;Acc:O45255]
WBGene00023245	C33E10.3	42.63	-1.23048	0.439623	-2.79893	0.00512719	0.0606211
WBGene00008034	C39E9.11	3167.86	-1.13545	0.40582	-2.79792	0.00514323	0.0607673
WBGene00007180	B0457.6	916.181	0.580576	0.207525	2.79762	0.00514814	0.0607818
WBGene00000164	apm-3	1127.24	0.538908	0.19277	2.7956	0.00518036	0.0608582	AdaPtin, Mu/medium chain (Clathrin associated complex) [Source:UniProtKB/TrEMBL;Acc:Q20736]
WBGene00003097	lys-8	18605.6	0.899939	0.321789	2.79667	0.00516319	0.0608582	LYSozyme [Source:UniProtKB/TrEMBL;Acc:Q09975]
WBGene00003711	nhr-121	417.364	0.667729	0.238823	2.79592	0.00517528	0.0608582	Nuclear hormone receptor family member nhr-121 [Source:UniProtKB/Swiss-Prot;Acc:Q9TZ99]
WBGene00009880	F49C12.11	8116.29	1.03743	0.37106	2.79586	0.00517611	0.0608582	Translation machinery-associated protein 7 homolog [Source:UniProtKB/Swiss-Prot;Acc:Q20588]
WBGene00015526	C06E1.11	61.7132	-1.03257	0.3692	-2.79678	0.00516152	0.0608582
WBGene00019162	eif-1.A	21305.5	0.758349	0.271215	2.79611	0.00517211	0.0608582	Eukaryotic Initiation Factor [Source:UniProtKB/TrEMBL;Acc:Q9TXU7]
WBGene00019665	K11H12.9	227.245	0.770014	0.275415	2.79583	0.00517672	0.0608582
WBGene00004305	ran-4	5479.03	0.679739	0.243182	2.79518	0.00518705	0.0608935	Probable nuclear transport factor 2 [Source:UniProtKB/Swiss-Prot;Acc:Q21735]
WBGene00011636	cec-3	3060.15	-1.03879	0.371702	-2.79468	0.00519512	0.0609018	Chromo domain-containing protein cec-3 [Source:UniProtKB/Swiss-Prot;Acc:P45968]
WBGene00044082	D1086.12	639.492	0.83125	0.297433	2.79475	0.00519401	0.0609018
WBGene00008990	smgl-1	1600.37	-1.17281	0.419874	-2.79324	0.00521826	0.0611297
WBGene00011540	T06E6.10	468.797	1.03235	0.369693	2.79246	0.00523081	0.0612335
WBGene00009508	row-1	2238.74	-1.22776	0.439837	-2.79139	0.00524817	0.0612633	Relative of Woc homolog [Source:UniProtKB/TrEMBL;Acc:Q8WQF4]
WBGene00015423	C04E6.7	365.201	0.703625	0.25202	2.79195	0.00523918	0.0612633
WBGene00045404	C06C3.11	46.5346	0.852061	0.305235	2.79149	0.00524652	0.0612633
WBGene00195186	F19G12.10	16.4238	-1.40848	0.504565	-2.79148	0.00524674	0.0612633
WBGene00019411	K05F1.10	237.688	0.750206	0.268835	2.79058	0.00526131	0.0613732
WBGene00003222	mes-4	2607.05	-1.12967	0.404858	-2.79028	0.00526618	0.0613868	Histone-lysine N-methyltransferase mes-4 [Source:UniProtKB/Swiss-Prot;Acc:Q9NH52]
WBGene00016808	C50D2.5	3916.77	0.604912	0.216816	2.78998	0.00527115	0.0614014	Splicing factor 3B subunit 6-like protein [Source:UniProtKB/Swiss-Prot;Acc:Q8ITY4]
WBGene00021538	rabs-5	363.302	-1.43123	0.513032	-2.78975	0.00527494	0.0614024	RABenoSyn (Trafficking protein) homolog [Source:UniProtKB/TrEMBL;Acc:W6SBE5]
WBGene00020868	eif-1	8091.73	0.675064	0.24201	2.78941	0.00528049	0.0614238	Eukaryotic Initiation Factor [Source:UniProtKB/TrEMBL;Acc:Q967F1]
WBGene00012878	Y45F10C.2	1165.74	0.961753	0.344863	2.78879	0.00529046	0.0614533	UPF0375 protein Y45F10C.2 [Source:UniProtKB/Swiss-Prot;Acc:O45941]
WBGene00017419	F13B9.1	2833.37	-0.515959	0.184998	-2.78899	0.00528719	0.0614533
WBGene00015462	C05C8.5	935.47	-1.10504	0.396323	-2.78822	0.00529982	0.0614756
WBGene00019622	K10C2.7	26.8596	1.63204	0.585287	2.78844	0.00529629	0.0614756
WBGene00001568	snpc-4	2537.42	-0.995476	0.357291	-2.78618	0.00533341	0.0617354	snRNA-activating protein complex subunit 4 homolog [Source:UniProtKB/Swiss-Prot;Acc:P91868]
WBGene00020665	T22B2.1	58.641	-1.64204	0.589349	-2.78619	0.00533319	0.0617354
WBGene00206505	B0250.18	11.5364	-1.5918	0.571307	-2.78625	0.00533216	0.0617354
WBGene00020269	erfa-1	10462.3	0.574166	0.206136	2.78537	0.00534661	0.0618449	Eukaryotic peptide chain release factor subunit 1 [Source:UniProtKB/Swiss-Prot;Acc:O16520]
WBGene00044241	C53D6.11	100.65	0.905249	0.325143	2.78416	0.00536673	0.0620343
WBGene00013136	Y53C10A.5	1425.52	0.814002	0.292395	2.78391	0.00537079	0.0620379
WBGene00021844	Y54E10BR.5	5880.51	0.635887	0.228518	2.78266	0.0053916	0.0622348	Signal peptidase complex catalytic subunit SEC11 [Source:UniProtKB/TrEMBL;Acc:Q9N3D0]
WBGene00017066	maco-1	2364.11	-1.44633	0.520058	-2.78109	0.00541761	0.0624914	MACOilin homolog [Source:UniProtKB/TrEMBL;Acc:P91193]
WBGene00006768	unc-32	6378.83	0.410836	0.147764	2.78036	0.00542994	0.06259	Probable V-type proton ATPase 116 kDa subunit a [Source:UniProtKB/Swiss-Prot;Acc:P30628]
WBGene00022223	Y73B3B.1	9.00143	-2.62206	0.943425	-2.7793	0.00544768	0.0627508
WBGene00010487	K02A11.2	13.1977	-1.65535	0.595945	-2.77769	0.00547472	0.0630183
WBGene00008558	F07H5.7	52.7734	0.939013	0.338196	2.77654	0.00549417	0.0631543
WBGene00010367	H05L14.2	1025.93	-1.05398	0.379597	-2.77658	0.00549343	0.0631543
WBGene00206386	K10C2.12	104.47	1.14366	0.411978	2.77602	0.00550295	0.0632113
WBGene00019692	M01A10.1	1007.36	-1.34516	0.484634	-2.77563	0.0055095	0.0632426
WBGene00007598	C15A11.4	233.333	0.737047	0.265759	2.77337	0.00554796	0.0635958
WBGene00008387	D1081.9	746.895	-0.81859	0.29516	-2.77337	0.00554785	0.0635958
WBGene00001490	frm-3	174.501	-0.864511	0.31176	-2.773	0.00555417	0.063598	FERM domain (Protein4.1-ezrin-radixin-moesin) family [Source:UniProtKB/TrEMBL;Acc:O17905]
WBGene00003164	mdt-6	1714.4	-1.10815	0.399636	-2.7729	0.00555584	0.063598	Mediator of RNA polymerase II transcription subunit 6 [Source:UniProtKB/Swiss-Prot;Acc:Q9N337]
WBGene00014226	ZK1098.11	644.063	0.742508	0.267894	2.77165	0.00557729	0.0637995
WBGene00017417	F13B6.2	216.109	0.739216	0.266808	2.77059	0.0055954	0.0639624
WBGene00008739	F13D12.3	1015	0.833541	0.300968	2.76953	0.00561371	0.0640542
WBGene00009595	F40F12.7	1415.66	0.607296	0.219284	2.76945	0.00561505	0.0640542
WBGene00013459	Y67A10A.10	276.77	0.904553	0.326569	2.76987	0.00560795	0.0640542
WBGene00010724	K09E9.1	465.191	0.659093	0.238041	2.76882	0.00562591	0.0641338
WBGene00007288	C04A11.5	144.205	0.923166	0.333622	2.7671	0.00565574	0.0642966
WBGene00020339	ttr-59	957.173	0.759355	0.274379	2.76755	0.00564799	0.0642966	TransThyretin-Related family domain [Source:UniProtKB/TrEMBL;Acc:Q8MPX6]
WBGene00219749	linc-30	20.4009	-1.61073	0.582061	-2.76729	0.00565243	0.0642966	NA
WBGene00235158	Y37E3.30	35.4663	-1.50357	0.543275	-2.7676	0.00564704	0.0642966
WBGene00009187	F27D4.1	8491.5	0.754191	0.272588	2.76678	0.00566136	0.0643164	Probable electron transfer flavoprotein subunit alpha, mitochondrial [Source:UniProtKB/Swiss-Prot;Acc:Q93615]
WBGene00022865	ufbp-1	1966.92	-1.27901	0.462393	-2.76607	0.00567361	0.0644113	DDRGK domain-containing protein 1 [Source:UniProtKB/Swiss-Prot;Acc:P34623]
WBGene00010792	K12G11.6	70.011	1.13681	0.411072	2.76548	0.0056839	0.0644436
WBGene00015392	nspc-7	140.546	0.87556	0.316606	2.76546	0.00568426	0.0644436	Nematode Specific Peptide family, group C [Source:UniProtKB/TrEMBL;Acc:Q8WQG6]
WBGene00015918	C17G10.6	39.4203	-1.36208	0.492611	-2.76501	0.00569208	0.0644881
WBGene00003474	mtl-2	1731.7	1.31885	0.47708	2.76442	0.00570237	0.0645344	Metallothionein-2 [Source:UniProtKB/Swiss-Prot;Acc:P17512]
WBGene00011032	R05D11.4	1620.06	-0.956325	0.345964	-2.76423	0.00570566	0.0645344
WBGene00019884	R05D3.12	870.949	-1.21728	0.440387	-2.76411	0.00570786	0.0645344	Putative DNA topoisomerase 2, mitochondrial [Source:UniProtKB/Swiss-Prot;Acc:P34534]
WBGene00004049	parp-1	1547.58	-1.35335	0.489699	-2.76363	0.00571617	0.0645841	Poly(ADP-ribose) polymerase pme-1 [Source:UniProtKB/Swiss-Prot;Acc:Q9N4H4]
WBGene00020763	ztf-18	1478.4	-0.830439	0.300607	-2.76254	0.00573533	0.0647563	Zinc finger putative Transcription Factor family [Source:UniProtKB/TrEMBL;Acc:B9ZSG9]
WBGene00004873	smc-3	2819.3	-1.18831	0.430227	-2.76205	0.00574392	0.0648091	Structural maintenance of chromosomes protein 3 [Source:UniProtKB/Swiss-Prot;Acc:B2FDA8]
WBGene00001833	hcp-6	2779.97	-0.910688	0.329846	-2.76095	0.00576335	0.0648955	HoloCentric chromosome binding Protein [Source:UniProtKB/TrEMBL;Acc:Q95Y84]
WBGene00010013	F54B3.1	2093.09	-0.841545	0.304774	-2.76121	0.00575872	0.0648955
WBGene00010965	ctc-2	25948	-1.52067	0.550764	-2.76101	0.00576228	0.0648955	Cytochrome c oxidase subunit 2 [Source:UniProtKB/Swiss-Prot;Acc:P24894]
WBGene00010294	fbxa-129	105.799	-1.08977	0.39475	-2.76066	0.00576843	0.0649086
WBGene00012950	eif-2Bbeta	1993.05	0.428007	0.155068	2.76012	0.00577802	0.0649722	Eukaryotic Initiation Factor [Source:UniProtKB/TrEMBL;Acc:Q9XWD5]
WBGene00006942	wrk-1	1510.62	0.714226	0.258816	2.75959	0.00578744	0.0649899	Wrapper/Rega-1/Klingon homolog [Source:UniProtKB/TrEMBL;Acc:Q5WRR1]
WBGene00206519	F36H5.13	203.682	-0.773241	0.280179	-2.75981	0.00578355	0.0649899
WBGene00008107	aspm-1	1728.67	-1.15977	0.420388	-2.75881	0.00580115	0.0649929
WBGene00010348	H01G02.1	1242.77	0.878792	0.318596	2.75832	0.00580985	0.0649929
WBGene00011984	T24C2.5	338.937	0.842784	0.305487	2.75882	0.00580099	0.0649929
WBGene00012996	pinn-4	2108.46	0.78996	0.2864	2.75824	0.00581129	0.0649929	Peptidyl-prolyl cis-trans isomerase [Source:UniProtKB/TrEMBL;Acc:Q9NAF9]
WBGene00017512	nhr-179	63.2982	-0.900638	0.326446	-2.75892	0.0057993	0.0649929	Nuclear Hormone Receptor family [Source:UniProtKB/TrEMBL;Acc:A0A0K3AXP8]
WBGene00022855	tcer-1	1682.5	-1.7725	0.642549	-2.75854	0.00580606	0.0649929	TransCription Elongation Regulator homolog [Source:UniProtKB/TrEMBL;Acc:Q86MP0]
WBGene00018218	F40A3.3	3862.31	0.92906	0.336862	2.75798	0.00581598	0.0650014	Phosphatidylethanolamine-binding protein homolog F40A3.3 [Source:UniProtKB/Swiss-Prot;Acc:O16264]
WBGene00000409	cdk-8	1169.14	-1.17289	0.425425	-2.75698	0.00583383	0.0651569	Cyclin-dependent kinase 8 [Source:UniProtKB/Swiss-Prot;Acc:P90866]
WBGene00016838	C50F2.4	400.671	0.921069	0.334202	2.75603	0.00585084	0.0652707
WBGene00018658	bath-22	83.1714	-0.889705	0.322829	-2.75597	0.00585191	0.0652707
WBGene00001867	him-8	819.261	-1.14878	0.416878	-2.75568	0.00585702	0.0652836	High Incidence of Males (Increased X chromosome loss) [Source:UniProtKB/TrEMBL;Acc:O18068]
WBGene00003374	mlk-1	454.101	-0.749735	0.272099	-2.75537	0.00586256	0.0653014	Mitogen-activated protein kinase kinase kinase mlk-1 [Source:UniProtKB/Swiss-Prot;Acc:A0A0K3AV08]
WBGene00012217	W02H3.1	174.316	0.832782	0.302357	2.7543	0.00588182	0.0654719
WBGene00019388	K04F1.9	177.742	0.939731	0.341253	2.75377	0.00589134	0.0655337
WBGene00007128	memb-1	377.147	0.613298	0.222732	2.75353	0.00589569	0.0655381	Golgi SNAP receptor complex member 2 homolog memb-1 [Source:UniProtKB/Swiss-Prot;Acc:P41941]
WBGene00003087	lsy-2	2026.06	0.682424	0.247921	2.75259	0.00591264	0.0655942
WBGene00008998	ncs-4	85.8875	0.828325	0.30088	2.753	0.00590512	0.0655942	Neuronal Calcium Sensor family [Source:UniProtKB/TrEMBL;Acc:A6PVB9]
WBGene00023318	K07D4.1	81.0379	-0.798257	0.289991	-2.7527	0.00591065	0.0655942
WBGene00003860	oig-2	362.072	1.2272	0.446114	2.75087	0.00594375	0.0658468	One IG domain [Source:UniProtKB/TrEMBL;Acc:Q9XWM1]
WBGene00010123	F55G11.2	308.91	0.98914	0.359606	2.75062	0.00594825	0.0658468
WBGene00018342	F42A10.6	1289.39	0.921682	0.335102	2.75045	0.00595133	0.0658468
WBGene00018890	F55F8.2	1873.85	-1.15114	0.418453	-2.75093	0.00594259	0.0658468
WBGene00011684	T10B10.8	273.284	0.702666	0.255507	2.75008	0.00595807	0.0658773
WBGene00016273	C30G12.1	28.7172	-1.09739	0.399092	-2.74971	0.00596478	0.0659074
WBGene00001609	glp-1	3204.31	-1.53135	0.556999	-2.74929	0.00597246	0.06593
WBGene00011062	R06C7.2	251.799	-1.02599	0.373248	-2.74881	0.00598118	0.06593
WBGene00015638	C09E7.4	295.54	-1.13814	0.414046	-2.74882	0.00598093	0.06593
WBGene00022613	sek-3	1898.81	0.452161	0.164499	2.74872	0.00598276	0.06593	SAPK/ERK kinase [Source:UniProtKB/TrEMBL;Acc:Q23326]
WBGene00021883	Y54G2A.18	10637	0.873093	0.317704	2.74813	0.00599358	0.0660052	4D656 [Source:UniProtKB/TrEMBL;Acc:G5EBI0]
WBGene00000464	ceh-44	2118.1	-0.726237	0.264326	-2.7475	0.00600507	0.0660878	Homeobox protein cut-like ceh-44 [Source:UniProtKB/Swiss-Prot;Acc:Q9BL02]
WBGene00015683	C10G8.4	4756.07	1.31928	0.480301	2.74678	0.00601841	0.0661905
WBGene00007028	trr-1	3284.7	-0.804754	0.293138	-2.74531	0.00604537	0.0662667	Transcription-associated protein 1 [Source:UniProtKB/Swiss-Prot;Acc:G5EEV2]
WBGene00008733	F13B12.6	2110.03	-1.20517	0.438945	-2.74561	0.00603993	0.0662667
WBGene00009110	F25D1.5	113.509	0.999609	0.364029	2.74596	0.00603341	0.0662667
WBGene00013401	Y62H9A.13	13.3405	-1.62874	0.593178	-2.74579	0.00603652	0.0662667
WBGene00021074	W07E6.2	3582.29	0.487231	0.177476	2.74534	0.00604477	0.0662667
WBGene00010263	wago-4	2995.44	-0.761773	0.277509	-2.74503	0.00605046	0.0662786	Piwi-like protein [Source:UniProtKB/TrEMBL;Acc:O62275]
WBGene00015972	C18E3.3	724.629	-0.823608	0.300232	-2.74324	0.00608357	0.0665972
WBGene00019400	K04G7.1	1142.13	-1.38015	0.503217	-2.74266	0.00609447	0.0666283
WBGene00206377	F44E5.15	13.7429	-1.76073	0.641958	-2.74275	0.00609273	0.0666283
WBGene00009715	F44G4.6	58.5421	0.819911	0.299034	2.74187	0.00610912	0.0666912
WBGene00010503	K02C4.5	314.174	-0.948562	0.345977	-2.74169	0.00611232	0.0666912
WBGene00013250	Y57A10A.5	415.723	-1.17007	0.426741	-2.74188	0.00610882	0.0666912
WBGene00016431	C35A11.4	379.3	0.769529	0.280764	2.74084	0.00612825	0.0668209
WBGene00007331	pho-11	7984.24	0.792712	0.289257	2.74051	0.00613436	0.0668435	Putative acid phosphatase 11 [Source:UniProtKB/Swiss-Prot;Acc:Q09451]
WBGene00006663	twk-8	256.862	-0.854013	0.311711	-2.73975	0.00614852	0.0669371	TWiK family of potassium channels [Source:UniProtKB/TrEMBL;Acc:Q7JM20]
WBGene00020143	T01C8.2	1061.39	1.30656	0.476914	2.73962	0.00615104	0.0669371
WBGene00194692	T02C12.5	88.3399	1.11717	0.407848	2.73918	0.00615934	0.0669833
WBGene00000939	dcr-1	2516.83	-1.03062	0.376355	-2.73842	0.00617357	0.0670499	Endoribonuclease dcr-1 [Source:UniProtKB/Swiss-Prot;Acc:P34529]
WBGene00020855	hpo-36	252.461	0.614421	0.224357	2.73858	0.0061705	0.0670499
WBGene00043062	clec-80	812.043	1.0436	0.381186	2.73778	0.00618562	0.0671367	C-type LECtin [Source:UniProtKB/TrEMBL;Acc:Q95XX5]
WBGene00013594	Y87G2A.2	419.965	1.02361	0.373972	2.73712	0.00619792	0.0672261
WBGene00004051	parg-1	1533.36	-1.00262	0.366339	-2.73688	0.00620258	0.0672325	Poly(ADP-ribose) glycohydrolase 1 [Source:UniProtKB/Swiss-Prot;Acc:Q867X0]
WBGene00012112	T28A8.6	1074.58	-1.09733	0.401078	-2.73596	0.00621987	0.0673317
WBGene00019944	R07G3.8	299.453	0.604	0.220753	2.73609	0.0062174	0.0673317
WBGene00206459	Y80D4G.1	357.324	-1.09963	0.402058	-2.735	0.00623794	0.0674832
WBGene00012825	Y43F8C.3	672.355	0.532506	0.194758	2.73419	0.00625342	0.0676064
WBGene00021830	Y54E10A.10	4417.39	0.601145	0.219886	2.73389	0.00625904	0.067623	Ribosome production factor 2 homolog [Source:UniProtKB/Swiss-Prot;Acc:Q9N3F0]
WBGene00012557	Y37D8A.19	30454.9	1.31049	0.479464	2.73323	0.00627163	0.0677147
WBGene00018262	cyp-33C3	101.614	-0.868659	0.31784	-2.73301	0.00627592	0.0677169	CYtochrome P450 family [Source:UniProtKB/TrEMBL;Acc:O16670]
WBGene00010240	gadr-1	13.8676	-1.45586	0.533006	-2.73141	0.00630639	0.0680013
WBGene00018468	cla-1	138.247	-1.17735	0.431247	-2.7301	0.00633148	0.0682274	LOW QUALITY PROTEIN: Uncharacterized protein CELE_F45E4.3 [Source:RefSeq peptide;Acc:NP_001294148]
WBGene00235090	C38D9.13	10.4261	-2.18137	0.79934	-2.72896	0.00635347	0.0684198
WBGene00003400	dapk-1	1104.36	0.769101	0.281872	2.72855	0.00636137	0.0684603	Death-associated protein kinase dapk-1 [Source:UniProtKB/Swiss-Prot;Acc:O44997]
WBGene00007726	C25F9.6	66.3831	1.01457	0.37189	2.72815	0.00636909	0.0684988
WBGene00007943	C34F6.9	478.701	-0.94351	0.345895	-2.72773	0.00637715	0.0685409
WBGene00012726	Y39G8B.5	15.8793	-1.65467	0.60672	-2.72724	0.00638658	0.0685977
WBGene00003785	nos-3	4001.76	-0.873171	0.320247	-2.72655	0.0064	0.0686019	NanOS related [Source:UniProtKB/TrEMBL;Acc:O18218]
WBGene00006861	cal-5	2839.51	0.498939	0.183048	2.72574	0.00641583	0.0686019	CALmodulin related genes [Source:UniProtKB/TrEMBL;Acc:Q18136]
WBGene00009182	F26H11.4	86.0438	-1.0669	0.391376	-2.72604	0.00640996	0.0686019
WBGene00013540	Y75B8A.3	157.349	-1.00467	0.368448	-2.72677	0.0063958	0.0686019
WBGene00014250	ZK1307.9	1400	-1.34898	0.494835	-2.72613	0.00640815	0.0686019	Coiled-coil domain-containing protein 130 homolog [Source:UniProtKB/Swiss-Prot;Acc:Q09651]
WBGene00017299	molo-1	114.441	0.714656	0.262189	2.72573	0.006416	0.0686019
WBGene00022021	Y61A9LA.10	2938.61	-0.989215	0.362904	-2.72583	0.00641401	0.0686019
WBGene00021995	Y59E9AL.5	18.7829	-2.00905	0.737408	-2.72447	0.00644042	0.0688185
WBGene00000156	36982	2493.34	-1.30169	0.477947	-2.72351	0.00645922	0.0689121	Adenomatous polyposis coli protein-related protein 1 [Source:UniProtKB/Swiss-Prot;Acc:Q21227]
WBGene00003927	pas-6	8240.08	0.487904	0.179152	2.72341	0.00646123	0.0689121	Proteasome subunit alpha type-1 [Source:UniProtKB/Swiss-Prot;Acc:O44156]
WBGene00021847	Y54F10AL.1	2456.82	0.622187	0.228461	2.72338	0.00646168	0.0689121
WBGene00005153	srf-3	652.433	0.683349	0.250947	2.72308	0.00646762	0.068931	UDP-galactose/UDP-N-acetylglucosamine transporter srf-3 [Source:UniProtKB/Swiss-Prot;Acc:Q93890]
WBGene00021839	nduf-5	2665.52	0.716757	0.263272	2.7225	0.00647897	0.0690075	NADH Ubiquinone oxidoreductase Fe-S protein [Source:UniProtKB/TrEMBL;Acc:Q9N3D9]
WBGene00016977	akap-1	7386.07	-0.779547	0.286375	-2.72212	0.0064864	0.0690422	KH domain-containing protein akap-1 [Source:UniProtKB/Swiss-Prot;Acc:Q09285]
WBGene00010483	K01G12.3	162.517	-1.9956	0.733362	-2.72116	0.00650523	0.0691981
WBGene00016874	C52B11.5	503.372	0.6951	0.255484	2.72072	0.00651393	0.069246
WBGene00009239	irld-6	41.5822	-1.17845	0.433307	-2.71966	0.00653486	0.0693645	Insulin/EGF-Receptor L Domain protein [Source:UniProtKB/TrEMBL;Acc:Q19893]
WBGene00016638	perm-4	80784.7	1.06935	0.393244	2.71931	0.00654185	0.0693645	PERMeable eggshell [Source:UniProtKB/TrEMBL;Acc:O44144]
WBGene00017257	F08F1.3	217.719	0.472189	0.173609	2.71984	0.00653137	0.0693645
WBGene00019331	dos-3	16.6966	-1.71056	0.629002	-2.71948	0.00653841	0.0693645	Delta and OSM-11-like [Source:UniProtKB/TrEMBL;Acc:B2MZA5]
WBGene00000023	abt-5	114.97	-1.30655	0.480814	-2.71737	0.00658033	0.0693724	ABC Transporter family [Source:UniProtKB/TrEMBL;Acc:Q9XW49]
WBGene00000157	aps-2	1576.99	0.876393	0.322486	2.71762	0.00657539	0.0693724	AdaPtin, Small chain (Clathrin associated complex) [Source:UniProtKB/TrEMBL;Acc:Q19123]
WBGene00000250	bir-2	1101.2	-1.2264	0.451058	-2.71894	0.00654911	0.0693724	BIR (Baculovirus inhibitory repeat) family; Inhibitor of apoptosis homolog [Source:UniProtKB/TrEMBL;Acc:G5ECJ5]
WBGene00001777	gst-29	206.982	0.962886	0.354268	2.71796	0.00656857	0.0693724	Glutathione S-Transferase [Source:UniProtKB/TrEMBL;Acc:Q9NAB1]
WBGene00012035	T26C5.5	57.1025	0.846047	0.311268	2.71807	0.00656647	0.0693724
WBGene00013018	Y48G10A.1	4059.73	0.795395	0.292624	2.71815	0.00656487	0.0693724	S-formylglutathione hydrolase [Source:UniProtKB/TrEMBL;Acc:G5EF86]
WBGene00018208	F39G3.3	1117.89	-0.888715	0.326935	-2.71833	0.00656132	0.0693724
WBGene00022419	Y102A11A.9	105.543	-1.02014	0.375248	-2.71858	0.00655627	0.0693724
WBGene00050939	C05G5.7	41.4441	-1.90228	0.700039	-2.7174	0.00657977	0.0693724
WBGene00003136	mau-2	1268.44	-0.885729	0.326031	-2.71671	0.00659349	0.0694211	Maternal uncoordinated protein 2 [Source:UniProtKB/Swiss-Prot;Acc:O17581]
WBGene00008211	C49F5.7	818.426	1.37786	0.507187	2.71667	0.00659424	0.0694211
WBGene00009140	F26A3.1	1278.46	-0.457183	0.168299	-2.71648	0.00659796	0.0694211
WBGene00022399	Y97E10AR.4	1041.63	-1.47984	0.5448	-2.71629	0.00660174	0.0694211
WBGene00022440	Y110A2AL.3	246.069	0.935091	0.344319	2.71577	0.00661226	0.0694875
WBGene00003710	nhr-120	338.307	0.503888	0.185575	2.71527	0.00662211	0.0695468	Nuclear Hormone Receptor family; Nuclear receptor NHR-120 [Source:UniProtKB/TrEMBL;Acc:G5EET0]
WBGene00010001	F53F8.4	800.678	0.856316	0.315505	2.71411	0.00664531	0.0697463
WBGene00021486	lbp-9	20513.8	0.9748	0.359214	2.7137	0.00665363	0.0697893	Fatty acid-binding protein homolog 9 [Source:UniProtKB/Swiss-Prot;Acc:Q965W1]
WBGene00015756	C14C6.2	2028	0.881661	0.325023	2.71261	0.00667552	0.069944
WBGene00017700	F22D3.4	21.8041	-1.50535	0.555003	-2.71234	0.00668107	0.069944
WBGene00020589	T19H12.3	306.659	0.720967	0.265791	2.71253	0.00667712	0.069944
WBGene00007677	C18D4.8	55.7644	-0.995195	0.367063	-2.71124	0.00670326	0.070132
WBGene00003893	ost-1	17388.8	0.763368	0.281619	2.71064	0.00671539	0.0701717	SPARC [Source:UniProtKB/Swiss-Prot;Acc:P34714]
WBGene00007433	swsn-7	4232.15	-1.06991	0.394807	-2.70995	0.00672941	0.0701717	SWI/SNF nucleosome remodeling complex component [Source:UniProtKB/Swiss-Prot;Acc:Q09441]
WBGene00008917	F17C11.6	277.17	1.03351	0.38142	2.70963	0.00673576	0.0701717
WBGene00009364	F33H1.3	2694.58	-0.759541	0.280263	-2.7101	0.00672638	0.0701717
WBGene00010185	F57A10.4	339.896	-0.998126	0.368369	-2.70958	0.00673676	0.0701717
WBGene00021634	rde-10	704.875	-0.970045	0.35794	-2.71008	0.00672671	0.0701717	RNA interference defective protein 10 [Source:UniProtKB/Swiss-Prot;Acc:Q9N3S2]
WBGene00023498	lin-15A	610.341	-0.957012	0.35314	-2.71001	0.00672815	0.0701717
WBGene00000217	asp-4	26599.5	0.799124	0.295197	2.70709	0.00678758	0.0703503	ASpartyl Protease [Source:UniProtKB/TrEMBL;Acc:Q21966]
WBGene00009047	F22B8.4	77.1569	1.06536	0.393511	2.70731	0.0067831	0.0703503
WBGene00009295	fbxa-180	32.7351	-1.02295	0.377758	-2.70794	0.0067702	0.0703503
WBGene00009537	ccch-2	118.637	1.25347	0.462931	2.70768	0.00677544	0.0703503	CCCH-type zinc finger putative transcription factor [Source:UniProtKB/TrEMBL;Acc:O45491]
WBGene00013477	Y69E1A.5	721.626	1.05756	0.390535	2.70798	0.00676937	0.0703503
WBGene00015177	tmc-2	181.193	-0.769956	0.284424	-2.70707	0.00678793	0.0703503	Transmembrane channel-like protein 2 [Source:UniProtKB/Swiss-Prot;Acc:Q11069]
WBGene00019132	bath-19	207.53	-1.01611	0.375167	-2.70841	0.00676068	0.0703503	BTB and MATH domain containing [Source:UniProtKB/TrEMBL;Acc:Q9N5P6]
WBGene00021136	W10G11.3	85.1396	1.15089	0.425017	2.70787	0.0067717	0.0703503
WBGene00001909	his-35	6046.99	0.841017	0.310725	2.70663	0.00679698	0.0703784	Histone H2A [Source:UniProtKB/TrEMBL;Acc:Q27485]
WBGene00011683	phat-6	593.353	0.996235	0.368087	2.70653	0.00679914	0.0703784	PHAryngeal gland Toxin-related [Source:UniProtKB/TrEMBL;Acc:Q22373]
WBGene00019878	R05D3.3	158.055	-0.917528	0.339701	-2.70099	0.00691344	0.0715167	Putative zinc finger protein R05D3.3 [Source:UniProtKB/Swiss-Prot;Acc:P34536]
WBGene00044329	cpsf-4	2133.63	-1.25336	0.464224	-2.6999	0.00693604	0.0717057	Cleavage and Polyadenylation Specificity Factor [Source:UniProtKB/TrEMBL;Acc:Q7YTG9]
WBGene00007357	C06A12.3	384.453	0.668919	0.247802	2.6994	0.00694639	0.071723
WBGene00010541	ttr-1	370.729	0.691682	0.25623	2.69946	0.00694529	0.071723	Transthyretin-like protein 1 [Source:UniProtKB/Swiss-Prot;Acc:P34502]
WBGene00019076	mrpl-24	1131.11	0.496839	0.184079	2.69906	0.00695354	0.0717521	Probable 39S ribosomal protein L24, mitochondrial [Source:UniProtKB/Swiss-Prot;Acc:P91353]
WBGene00015635	C09D4.4	1920.49	-1.04518	0.387353	-2.69825	0.00697048	0.0718686
WBGene00022492	dss-1	8896.97	1.0902	0.404062	2.69811	0.00697353	0.0718686	Probable 26S proteasome complex subunit dss-1 [Source:UniProtKB/Swiss-Prot;Acc:Q95Y72]
WBGene00077732	szy-4	2559.33	-1.39282	0.516282	-2.6978	0.00698	0.0718905	Suppressor of ZYg-1 [Source:UniProtKB/TrEMBL;Acc:Q18320]
WBGene00000101	aka-1	4570.97	-1.33305	0.49427	-2.697	0.00699663	0.072017	A Kinase Anchor protein; A kinase anchor protein [Source:UniProtKB/TrEMBL;Acc:Q18930]
WBGene00020254	T05C3.2	22.7237	-1.30464	0.483802	-2.69664	0.00700433	0.0720514
WBGene00003953	pbs-7	10965.3	0.953294	0.353714	2.6951	0.00703671	0.0723395	Proteasome subunit beta [Source:UniProtKB/TrEMBL;Acc:P90868]
WBGene00003596	ngp-1	4346.74	-1.05015	0.389708	-2.6947	0.00704511	0.0723808	Nucleolar GTP-binding protein 2 [Source:UniProtKB/TrEMBL;Acc:Q9U365]
WBGene00000799	crn-6	956.572	0.690456	0.25652	2.69163	0.00711041	0.0728256	Cell death-related nuclease 6 [Source:UniProtKB/Swiss-Prot;Acc:P34508]
WBGene00007955	selt-1.1	3399.56	0.498224	0.185088	2.69183	0.00710617	0.0728256	Putative selT-like protein C35C5.3 [Source:UniProtKB/Swiss-Prot;Acc:Q9U3N5]
WBGene00011869	dod-6	5988.93	0.788636	0.292927	2.69226	0.0070969	0.0728256	Downstream Of DAF-16 (Regulated by DAF-16) [Source:UniProtKB/TrEMBL;Acc:Q22613]
WBGene00016274	C30G12.2	1165.02	1.16701	0.433565	2.69166	0.00710972	0.0728256
WBGene00019823	fnta-1	3201.03	0.514464	0.191096	2.69218	0.00709863	0.0728256	FarNesylTransferase, Alpha subunit [Source:UniProtKB/TrEMBL;Acc:O44501]
WBGene00014052	ZK669.2	238.466	0.703263	0.261325	2.69114	0.00712086	0.0728798
WBGene00045456	C10A4.9	70.3623	0.868251	0.322654	2.69097	0.00712452	0.0728798
WBGene00008965	mltn-10	13.5038	-1.45623	0.541209	-2.69071	0.00713011	0.072892	MLt-TeN (Mlt-10) related [Source:UniProtKB/TrEMBL;Acc:Q7YX27]
WBGene00019457	vms-1	2555.98	-1.16874	0.434474	-2.69001	0.00714504	0.0729995
WBGene00044953	D2096.13	109.152	1.05082	0.390905	2.68818	0.00718416	0.0733538
WBGene00009408	F35C12.3	418.995	0.82414	0.306625	2.68778	0.00719297	0.0733985
WBGene00003588	nex-1	9716.56	0.707572	0.263348	2.68683	0.00721329	0.0735605	Annexin [Source:UniProtKB/TrEMBL;Acc:G5EEA8]
WBGene00012891	sorb-1	234.671	-0.947401	0.352719	-2.68599	0.00723151	0.0736554	SORBin homolog [Source:UniProtKB/TrEMBL;Acc:G5EC32]
WBGene00013931	clec-97	344.464	1.06065	0.394871	2.68607	0.00722981	0.0736554	C-type LECtin [Source:UniProtKB/TrEMBL;Acc:Q9XUI4]
WBGene00002129	inx-7	515.891	-0.971872	0.361897	-2.68549	0.00724228	0.0736894	Innexin-7 [Source:UniProtKB/Swiss-Prot;Acc:Q21123]
WBGene00043067	dlc-5	82.5076	0.871171	0.324407	2.68543	0.00724376	0.0736894	Dynein Light Chain [Source:UniProtKB/TrEMBL;Acc:Q65XS9]
WBGene00018948	F56C9.3	2172.98	-1.08285	0.403586	-2.68306	0.00729511	0.0741662
WBGene00016143	eri-9	1734.38	-1.3057	0.486685	-2.68284	0.00729989	0.0741693	Enhanced RNAI (RNA interference) [Source:UniProtKB/TrEMBL;Acc:H2KZ13]
WBGene00007223	C01F6.9	3147.23	0.693737	0.258665	2.68199	0.00731858	0.0743135	Nx [Source:UniProtKB/TrEMBL;Acc:G5EDA6]
WBGene00021345	Y37B11A.3	77.6087	-1.29935	0.484582	-2.68139	0.00733177	0.0744017
WBGene00007516	gpx-5	1326.34	0.86582	0.322988	2.68066	0.00734781	0.0745187	Glutathione peroxidase [Source:UniProtKB/TrEMBL;Acc:Q93204]
WBGene00002363	let-92	13537.7	0.525767	0.19628	2.67866	0.00739171	0.0749181	Serine/threonine-protein phosphatase 2A catalytic subunit [Source:UniProtKB/Swiss-Prot;Acc:G5EGK8]
WBGene00000772	cpb-3	3130.2	-1.24951	0.466676	-2.67746	0.0074182	0.0751405	Cytoplasmic polyadenylation element-binding protein 3 [Source:UniProtKB/Swiss-Prot;Acc:O01835]
WBGene00004315	rbd-1	2226.91	-1.07274	0.4008	-2.67649	0.00743974	0.0753125	RBD (RNA binding domain) protein [Source:UniProtKB/TrEMBL;Acc:A0A061AJ27]
WBGene00021324	Y34B4A.8	639.417	-0.585133	0.218645	-2.67617	0.00744683	0.0753382
WBGene00002262	ldh-1	4178.2	0.877566	0.327945	2.67596	0.00745163	0.0753408	L-lactate dehydrogenase [Source:UniProtKB/Swiss-Prot;Acc:Q27888]
WBGene00016749	C48E7.1	2264.3	0.68003	0.254212	2.67505	0.00747182	0.0754987
WBGene00016661	C45B2.6	396.572	-0.47201	0.176513	-2.67408	0.00749345	0.0756248
WBGene00017640	F20D6.11	594.18	0.551008	0.206042	2.67425	0.00748975	0.0756248
WBGene00017428	F13D11.3	291.78	0.869264	0.325124	2.67364	0.0075034	0.0756792
WBGene00007257	C01H6.8	249.658	0.530283	0.198363	2.6733	0.00751087	0.0756849
WBGene00010080	F55A11.7	2013.37	-1.03354	0.386628	-2.6732	0.00751313	0.0756849
WBGene00000286	cal-2	284.045	0.671774	0.251337	2.6728	0.00752205	0.0757287	CALmodulin related genes; Calmodulin-like protein [Source:UniProtKB/TrEMBL;Acc:G5EEG0]
WBGene00018217	F40A3.2	771.352	0.649233	0.242962	2.67216	0.00753652	0.0758282
WBGene00008436	DH11.2	997.134	0.65902	0.246662	2.67176	0.00754553	0.0758341
WBGene00011226	slc-25A21	1058.25	0.565419	0.211663	2.67132	0.00755544	0.0758341	SLC (SoLute Carrier) homolog [Source:UniProtKB/TrEMBL;Acc:O62347]
WBGene00022117	Y71F9AL.12	1948.46	0.72669	0.272024	2.67142	0.00755308	0.0758341
WBGene00194708	Y36E3A.2	37.4814	-1.61599	0.604912	-2.67145	0.0075524	0.0758341
WBGene00007324	C05B5.8	1138.14	0.971407	0.363894	2.66948	0.00759689	0.0762039
WBGene00003989	pfn-1	14411.9	0.678455	0.254309	2.66784	0.00763399	0.0763601	Profilin-1 [Source:UniProtKB/Swiss-Prot;Acc:Q9XW16]
WBGene00017582	F18G5.6	720.668	-0.667155	0.25005	-2.66809	0.00762838	0.0763601
WBGene00019521	dmd-7	1154.37	-0.862931	0.323414	-2.6682	0.00762599	0.0763601	DM (Doublesex/MAB-3) Domain family [Source:UniProtKB/TrEMBL;Acc:O01582]
WBGene00019554	K09C4.10	387.172	-0.814199	0.305198	-2.66777	0.00763555	0.0763601
WBGene00020263	let-355	1951.37	-1.044	0.391322	-2.66787	0.00763332	0.0763601
WBGene00006578	tli-1	927.465	0.612433	0.229593	2.66747	0.00764252	0.0763836	ToLlIp homolog [Source:UniProtKB/TrEMBL;Acc:Q93565]
WBGene00016216	pals-22	286.039	0.560608	0.21021	2.6669	0.00765547	0.0764669	Protein containing ALS2cr12 (ALS2CR12) domain [Source:UniProtKB/TrEMBL;Acc:Q9TZB2]
WBGene00003111	mab-20	2929.25	0.600227	0.22513	2.66614	0.00767289	0.0765484	Semaphorin-2A [Source:UniProtKB/Swiss-Prot;Acc:Q95XP4]
WBGene00004087	ppk-1	2119.28	-0.799462	0.299851	-2.66619	0.00767159	0.0765484	PIP Kinase [Source:UniProtKB/TrEMBL;Acc:O01759]
WBGene00018024	F35A5.1	557.552	-1.03835	0.389614	-2.66508	0.00769706	0.0767433
WBGene00044654	fbxa-85	43.4812	0.921246	0.345737	2.66459	0.00770824	0.0768084	F-box A protein [Source:UniProtKB/TrEMBL;Acc:G5EEL4]
WBGene00004184	T19D2.2	1631.46	0.692139	0.259853	2.66358	0.00773141	0.076993	Putative prenylated protein tyrosine phosphatase [Source:UniProtKB/TrEMBL;Acc:G5EG43]
WBGene00008356	nspc-20	1017.96	0.922022	0.346215	2.66315	0.0077414	0.0770202	Nematode Specific Peptide family, group C [Source:UniProtKB/TrEMBL;Acc:G5ECP8]
WBGene00044294	C01B10.11	1468.35	0.698027	0.262115	2.66306	0.00774346	0.0770202
WBGene00001565	gei-8	885.831	-0.853196	0.320523	-2.66188	0.00777045	0.0772422	Nuclear receptor corepressor 1 [Source:UniProtKB/Swiss-Prot;Acc:P34333]
WBGene00006538	tbb-4	387.834	1.01882	0.382863	2.66105	0.00778972	0.0772944	Tubulin beta-4 chain [Source:UniProtKB/Swiss-Prot;Acc:P41937]
WBGene00009944	mtcu-2	1048.17	-1.42419	0.535173	-2.66119	0.0077866	0.0772944	Protein MTO1 homolog, mitochondrial [Source:UniProtKB/Swiss-Prot;Acc:Q20680]
WBGene00018694	F52E1.5	87.1336	0.887046	0.333296	2.66144	0.00778077	0.0772944
WBGene00004378	rme-8	2603.2	-0.864059	0.324755	-2.66065	0.007799	0.0773401	Endocytosis protein RME-8; Receptor Mediated Endocytosis [Source:UniProtKB/TrEMBL;Acc:G5ED36]
WBGene00002072	ima-1	2262.39	-1.3783	0.518118	-2.6602	0.00780945	0.0773973	Importin subunit alpha-1 [Source:UniProtKB/Swiss-Prot;Acc:Q22560]
WBGene00003777	nmy-2	8578.91	-1.26749	0.476557	-2.65969	0.00782133	0.0774583	Non-muscle MYosin [Source:UniProtKB/TrEMBL;Acc:G5EBY3]
WBGene00020128	R193.2	606.077	-0.76429	0.287378	-2.65953	0.00782497	0.0774583
WBGene00022138	trpp-10	662.638	-0.825253	0.31037	-2.65893	0.00783887	0.0775495	TRansport Protein Particle [Source:UniProtKB/TrEMBL;Acc:B1V899]
WBGene00017696	polk-1	1836.78	-1.35223	0.508643	-2.65851	0.00784882	0.0775551	DNA polymerase kappa [Source:UniProtKB/Swiss-Prot;Acc:P34409]
WBGene00044170	Y51B9A.10	13.3652	-1.27692	0.480311	-2.65853	0.00784829	0.0775551
WBGene00045411	C25F9.11	1433.87	0.661571	0.248908	2.6579	0.00786293	0.0776482
WBGene00017991	clec-180	568.164	-1.5503	0.583342	-2.65761	0.00786968	0.0776684	C-type lectin domain-containing protein 180 [Source:UniProtKB/Swiss-Prot;Acc:Q19970]
WBGene00020249	T05C1.2	26.1471	1.38455	0.521292	2.656	0.00790733	0.0779936
WBGene00008399	D2005.4	1187.29	-1.18712	0.447046	-2.65548	0.00791946	0.0780201
WBGene00017361	F10E9.12	607.394	0.831088	0.31297	2.65549	0.00791932	0.0780201
WBGene00044452	Y102E9.5	146.636	0.640872	0.241395	2.65487	0.00793389	0.0781157
WBGene00008450	E01G6.2	261.054	0.46019	0.173517	2.65213	0.00799869	0.0787069
WBGene00006406	srgp-1	5808.63	-1.33259	0.502611	-2.65134	0.00801724	0.0788205	Slit-Robo GAP homolog [Source:UniProtKB/TrEMBL;Acc:D3YT54]
WBGene00007001	tufm-2	1598.64	-0.948919	0.357916	-2.65124	0.00801976	0.0788205	Mitochondrial elongation factor Tu homologue; TU elongation Factor (EF-Tu), Mitochondrial [Source:UniProtKB/TrEMBL;Acc:G5EDF5]
WBGene00004024	php-3	398.774	0.63332	0.238937	2.65058	0.00803544	0.0788845	Posterior Hox gene Paralog [Source:UniProtKB/TrEMBL;Acc:Q9XW88]
WBGene00004243	puf-7	1178.38	-0.90171	0.340272	-2.64996	0.00805002	0.0788845	Pumilio domain-containing protein 7 [Source:UniProtKB/Swiss-Prot;Acc:O44169]
WBGene00004347	rgs-4	265.601	0.950262	0.358561	2.65021	0.00804423	0.0788845	Regulator of G protein Signaling [Source:UniProtKB/TrEMBL;Acc:H2KMK7]
WBGene00013307	Y57G11C.9	4865.11	-0.695536	0.26247	-2.64996	0.00805012	0.0788845
WBGene00018935	skr-18	2281.6	0.571508	0.215642	2.65026	0.00804299	0.0788845	SKp1 Related (Ubiquitin ligase complex component) [Source:UniProtKB/TrEMBL;Acc:Q8WSN2]
WBGene00018258	F41B4.2	482.525	0.863693	0.326049	2.64897	0.0080738	0.0790697
WBGene00014000	ZK550.6	3347.13	1.02672	0.38782	2.64741	0.00811119	0.0793889	Probable phytanoyl-CoA dioxygenase [Source:UniProtKB/Swiss-Prot;Acc:O62515]
WBGene00009055	F22D6.14	59.0519	-1.07283	0.40528	-2.64713	0.00811779	0.0794065
WBGene00021702	Y48G9A.9	1523.41	0.610891	0.230893	2.64577	0.00815053	0.0796796	Protein-tyrosine-phosphatase [Source:UniProtKB/TrEMBL;Acc:Q7YZG5]
WBGene00044396	ZK1290.14	443.575	0.873295	0.330099	2.64556	0.00815567	0.0796828
WBGene00007594	lgc-23	24.6544	1.11432	0.421387	2.6444	0.00818352	0.0797233	Ligand-Gated ion Channel [Source:UniProtKB/TrEMBL;Acc:Q17999]
WBGene00010519	K03A11.1	222.808	-1.77311	0.67065	-2.64387	0.00819634	0.0797233
WBGene00011451	T04H1.5	1149.56	-1.28982	0.487816	-2.64407	0.00819166	0.0797233
WBGene00012710	Y39C12A.9	157.441	0.888661	0.336049	2.64443	0.00818275	0.0797233
WBGene00013611	Y102A5C.2	210.823	-0.919743	0.347888	-2.64379	0.00819838	0.0797233
WBGene00015320	C02B8.1	47.8388	-0.947223	0.35818	-2.64454	0.00818009	0.0797233
WBGene00016165	C27F2.1	33.265	-1.17555	0.444551	-2.64435	0.00818486	0.0797233
WBGene00019097	F59B1.2	4204.04	0.636911	0.240861	2.64431	0.00818585	0.0797233
WBGene00007720	C25D7.10	1287.13	-0.569968	0.215727	-2.64207	0.00824001	0.0800811
WBGene00016658	C45B2.1	928.285	1.07355	0.406361	2.64186	0.00824532	0.0800856
WBGene00021055	W06A11.4	96.8492	-0.830889	0.314603	-2.64107	0.0082645	0.0802248
WBGene00194707	C53A5.17	636.958	-0.816185	0.30917	-2.63992	0.00829253	0.0804497	tRNA (guanine(37)-N1)-methyltransferase [Source:UniProtKB/Swiss-Prot;Acc:A8WHT1]
WBGene00018281	tbc-18	220.704	-0.801365	0.303618	-2.63939	0.0083056	0.0805292	TBC (Tre-2/Bub2/Cdc16) domain family [Source:UniProtKB/TrEMBL;Acc:Q94222]
WBGene00023187	Y67D8C.12	9.05481	-1.88351	0.71372	-2.639	0.00831514	0.0805745
WBGene00017909	F28H1.4	91.4246	0.829839	0.3145	2.63859	0.00832506	0.0806235
WBGene00017355	F10E9.3	2566.06	-0.725655	0.27511	-2.63769	0.00834727	0.0807912
WBGene00011917	T22C1.6	1993.45	-1.13421	0.430036	-2.63748	0.00835239	0.0807935
WBGene00020408	T10D4.6	512.349	-0.608792	0.230877	-2.63687	0.0083674	0.0808914
WBGene00001116	dyc-1	180.744	-0.930858	0.353184	-2.63561	0.00839853	0.0810895	Dystrophin-like protein 1 [Source:UniProtKB/Swiss-Prot;Acc:Q8STF6]
WBGene00011860	T20D3.8	1506.96	-0.625558	0.237347	-2.63563	0.00839809	0.0810895
WBGene00017507	F16B4.5	52.0362	-1.09061	0.413824	-2.63545	0.0084026	0.0810895
WBGene00022036	Y65B4BL.4	1818.51	-0.750848	0.284929	-2.63521	0.00840849	0.081099
WBGene00009647	phlp-2	44.3012	-1.14729	0.435722	-2.63308	0.00846136	0.0815614	Protein phosphatase PHLPP-like protein [Source:UniProtKB/Swiss-Prot;Acc:Q09564]
WBGene00013510	Y71A12B.13	24.8445	-1.10375	0.419383	-2.63183	0.00849261	0.081815
WBGene00019883	met-2	2737.81	-0.837219	0.318171	-2.63135	0.00850454	0.0818822	Histone-lysine N-methyltransferase met-2 [Source:UniProtKB/Swiss-Prot;Acc:P34544]
WBGene00045382	T05E12.8	14.5441	-1.75188	0.665866	-2.63098	0.00851391	0.0819247
WBGene00001562	lin-66	1966.95	-0.635696	0.241697	-2.63014	0.00853502	0.0820338
WBGene00015936	C17H12.11	225.664	1.01142	0.384553	2.63013	0.00853517	0.0820338
WBGene00004094	ppw-2	3753.18	-0.484977	0.184454	-2.62926	0.00855707	0.0821489	Piwi-like protein [Source:UniProtKB/TrEMBL;Acc:Q9N585]
WBGene00011774	ttr-54	626.894	0.819431	0.311646	2.62936	0.00855458	0.0821489	TransThyretin-Related family domain [Source:UniProtKB/TrEMBL;Acc:Q22499]
WBGene00013695	epg-8	1850.52	-0.888075	0.337892	-2.62828	0.00858176	0.0822904	Ectopic P Granules [Source:UniProtKB/TrEMBL;Acc:H1UBJ2]
WBGene00013920	pssy-1	1391.52	0.41747	0.158832	2.62838	0.00857922	0.0822904	PhosphatidylSerine SYnthase [Source:UniProtKB/TrEMBL;Acc:Q09643]
WBGene00206484	C31H2.14	15.7522	1.24084	0.472147	2.62807	0.00858708	0.0822937
WBGene00003396	mom-4	1346.94	-1.18577	0.451469	-2.62647	0.00862752	0.082556	Mitogen-activated protein kinase kinase kinase mom-4 [Source:UniProtKB/Swiss-Prot;Acc:Q9XTC6]
WBGene00008770	F13G3.12	115.966	0.762712	0.290393	2.62648	0.00862728	0.082556
WBGene00020861	T27E4.1	114.585	-0.674852	0.256966	-2.62623	0.0086337	0.082556
WBGene00020917	W01B11.6	1496.79	1.11301	0.423838	2.62603	0.0086386	0.082556
WBGene00044544	F26F12.8	136.616	1.19278	0.45422	2.626	0.00863941	0.082556
WBGene00000913	daf-18	8470.35	-1.37729	0.524654	-2.62514	0.00866146	0.0825937	Phosphatidylinositol 3,4,5-trisphosphate 3-phosphatase and dual-specificity protein phosphatase daf-18 [Source:UniProtKB/Swiss-Prot;Acc:G5EE01]
WBGene00003911	pak-1	2582.34	0.428569	0.163236	2.62546	0.00865324	0.0825937	Serine/threonine-protein kinase pak-1 [Source:UniProtKB/Swiss-Prot;Acc:Q17850]
WBGene00006705	ubc-8	407.814	0.610529	0.232566	2.62518	0.00866026	0.0825937	UBiquitin Conjugating enzyme [Source:UniProtKB/TrEMBL;Acc:Q9N2W9]
WBGene00017729	F22H10.5	23.1323	-1.44363	0.549942	-2.62506	0.00866332	0.0825937
WBGene00001830	hcp-2	4183.67	-0.819942	0.312405	-2.62462	0.0086747	0.0826545	HoloCentric chromosome binding Protein [Source:UniProtKB/TrEMBL;Acc:Q22257]
WBGene00000880	cyn-4	1436.7	-1.1096	0.42291	-2.62373	0.00869724	0.0828216	Peptidyl-prolyl cis-trans isomerase 4 [Source:UniProtKB/Swiss-Prot;Acc:P52012]
WBGene00012548	Y37D8A.6	755.525	0.706228	0.269287	2.62258	0.00872658	0.0830351
WBGene00044063	bpnt-1	1243.23	0.505667	0.192821	2.62246	0.0087297	0.0830351	3'(2'), 5'-BisPhosphate NucleoTidase 1 homolog [Source:UniProtKB/TrEMBL;Acc:Q23493]
WBGene00194746	pals-20	16.0167	-1.2855	0.490273	-2.62202	0.00874108	0.0830956	Protein containing ALS2cr12 (ALS2CR12) domain [Source:UniProtKB/TrEMBL;Acc:C7GIL1]
WBGene00017349	farl-11	3327.02	-1.17892	0.449813	-2.62091	0.00876953	0.0833181	FAR (Factor ARrest) Like [Source:UniProtKB/TrEMBL;Acc:A0A1D3PD01]
WBGene00016391	lonp-1	1917.05	-1.08639	0.414579	-2.62046	0.00878122	0.0833813	Lon protease homolog, mitochondrial [Source:UniProtKB/Swiss-Prot;Acc:O44952]
WBGene00006442	tag-65	1485.47	-0.93305	0.356157	-2.61978	0.00879877	0.0834521	SR-related CTD associated factor 6 [Source:UniProtKB/TrEMBL;Acc:G5ED97]
WBGene00195253	H16D19.5	33.5492	-1.0029	0.382801	-2.6199	0.00879567	0.0834521
WBGene00044720	metl-2	552.256	0.413105	0.157707	2.61944	0.00880738	0.0834859	MEthylTransferase Like [Source:UniProtKB/TrEMBL;Acc:Q2MDF2]
WBGene00016501	C37C3.9	2618.85	-1.24106	0.473825	-2.61924	0.00881259	0.0834875
WBGene00022312	clec-171	11.1643	-1.53931	0.587905	-2.6183	0.00883679	0.0836688	C-type LECtin [Source:UniProtKB/TrEMBL;Acc:Q9N4B3]
WBGene00003174	mec-10	44.2524	-1.13891	0.435037	-2.61796	0.00884578	0.083706	Degenerin mec-10 [Source:UniProtKB/Swiss-Prot;Acc:P34886]
WBGene00012582	clec-8	235.489	0.792848	0.302887	2.61763	0.00885415	0.0837373	C-type LECtin [Source:UniProtKB/TrEMBL;Acc:Q9NAK6]
WBGene00045357	F13A7.14	1409.09	-0.925532	0.353603	-2.61743	0.00885941	0.0837391
WBGene00006440	tag-63	1462.03	-0.985865	0.376813	-2.61632	0.00888825	0.0839638
WBGene00018212	F39H12.1	236.507	-0.947432	0.362181	-2.61591	0.00889897	0.0839813
WBGene00220006	K04F10.9	21.9518	1.34933	0.515826	2.61586	0.00890026	0.0839813	NA
WBGene00003149	mbk-1	1124.58	-0.734323	0.280848	-2.61466	0.00893158	0.0841642	Dual specificity tyrosine-phosphorylation-regulated kinase mbk-1 [Source:UniProtKB/Swiss-Prot;Acc:Q8WQL7]
WBGene00019458	K06H7.7	835.66	-0.697229	0.266674	-2.61453	0.00893491	0.0841642
WBGene00022298	Y76B12C.4	124.877	-0.9789	0.374359	-2.61487	0.00892611	0.0841642
WBGene00003912	pal-1	2800.47	-1.16603	0.446148	-2.61354	0.00896102	0.0843621	Homeobox protein pal-1 [Source:UniProtKB/Swiss-Prot;Acc:P34766]
WBGene00017837	F26G1.1	1735.45	-1.23361	0.472084	-2.61311	0.00897218	0.0844192
WBGene00016207	C29E4.10	45.3845	-1.06588	0.408005	-2.61242	0.00899044	0.0844948	Putative galactocerebrosidase [Source:UniProtKB/Swiss-Prot;Acc:Q95QT2]
WBGene00045482	T03F6.9	28.4833	1.06767	0.40867	2.61254	0.00898717	0.0844948
WBGene00009781	F46C5.6	144.246	-0.846291	0.324026	-2.6118	0.00900666	0.0845992
WBGene00007520	C11E4.6	390.174	-0.615889	0.235865	-2.6112	0.00902258	0.0846525
WBGene00013151	nsun-5	1212.31	0.461665	0.176797	2.61127	0.00902061	0.0846525	Nop2 (NOP2)/SUN domain family member [Source:UniProtKB/TrEMBL;Acc:Q9NAA7]
WBGene00000381	cct-6	13242.4	0.427867	0.163915	2.61029	0.00904647	0.0848197	T-complex protein 1 subunit zeta [Source:UniProtKB/Swiss-Prot;Acc:P46550]
WBGene00013763	Y113G7B.14	417.309	-1.20349	0.461084	-2.61013	0.00905065	0.0848197
WBGene00008284	C53D6.7	448.757	1.06299	0.407348	2.60953	0.00906677	0.0849226	Galectin [Source:UniProtKB/TrEMBL;Acc:Q18813]
WBGene00017031	D1044.6	2650.1	-1.03581	0.397133	-2.60822	0.00910136	0.0851984
WBGene00007505	pezo-1	2987.76	-0.773042	0.296451	-2.60765	0.00911651	0.085292	Piezo-type mechanosensitive ion channel component [Source:UniProtKB/TrEMBL;Acc:A0A061AE33]
WBGene00019503	tbce-1	851.075	-1.34128	0.514456	-2.60719	0.00912898	0.0853603	TuBulin folding Cofactor E homolog [Source:UniProtKB/TrEMBL;Acc:Q20068]
WBGene00004103	pqn-11	19.0216	-1.66105	0.637218	-2.60672	0.0091414	0.0854282	Prion-like-(Q/N-rich)-domain-bearing protein [Source:UniProtKB/TrEMBL;Acc:Q17862]
WBGene00008594	clec-57	316.819	0.756242	0.29019	2.60602	0.00916016	0.0855162	C-type LECtin [Source:UniProtKB/TrEMBL;Acc:Q19229]
WBGene00014150	ZK909.6	500.407	0.837407	0.32134	2.60598	0.00916116	0.0855162	CES-2 region pioneer [Source:UniProtKB/TrEMBL;Acc:Q94127]
WBGene00044520	F59A7.12	25.9392	1.82212	0.69945	2.60508	0.00918536	0.0856938
WBGene00000421	ced-7	3115.71	-1.18512	0.454964	-2.60488	0.00919078	0.0856959	ABC transporter ced-7 [Source:UniProtKB/Swiss-Prot;Acc:P34358]
WBGene00019605	ctsa-1	583.088	0.672098	0.258059	2.60443	0.00920264	0.0857349	Uncharacterized serine carboxypeptidase ctsa-1 [Source:UniProtKB/Swiss-Prot;Acc:Q09991]
WBGene00044614	C36B1.14	1029.93	-0.579487	0.222509	-2.60433	0.00920531	0.0857349
WBGene00022534	syx-16	1101.48	-0.886266	0.340496	-2.60287	0.0092447	0.0860532	SYntaXin [Source:UniProtKB/TrEMBL;Acc:Q9TY08]
WBGene00012014	T25B9.8	369.878	-1.16748	0.448684	-2.602	0.00926814	0.0861744
WBGene00044770	C53C11.5	250.273	0.704436	0.270728	2.60201	0.00926805	0.0861744
WBGene00013796	Y116A8C.19	138.253	1.21301	0.466264	2.60155	0.00928031	0.0862115
WBGene00018848	F55A3.2	619.162	-0.631087	0.242589	-2.60147	0.00928255	0.0862115
WBGene00044762	ZK688.11	748.101	-0.54854	0.210966	-2.60014	0.00931868	0.0864985
WBGene00003504	mut-7	2277	-0.983819	0.378465	-2.5995	0.00933599	0.0865956	Exonuclease mut-7 [Source:UniProtKB/Swiss-Prot;Acc:P34607]
WBGene00004358	rhr-1	4118.99	0.614211	0.236315	2.59912	0.00934627	0.0865956	RH (Rhesus) antigen Related [Source:UniProtKB/TrEMBL;Acc:Q22947]
WBGene00016167	vps-22	1713.58	-0.631603	0.243018	-2.599	0.00934958	0.0865956	Vacuolar-sorting protein SNF8 [Source:UniProtKB/TrEMBL;Acc:Q18258]
WBGene00017250	F08D12.7	323.575	0.970858	0.373553	2.59898	0.00935008	0.0865956
WBGene00006896	ver-3	544.983	-1.14468	0.440615	-2.59791	0.00937919	0.0868165	Tyrosine-protein kinase receptor ver-3 [Source:UniProtKB/Swiss-Prot;Acc:Q21038]
WBGene00015010	ptps-1	639.762	0.738396	0.284281	2.59742	0.00939266	0.0868926	Putative 6-pyruvoyl tetrahydrobiopterin synthase [Source:UniProtKB/Swiss-Prot;Acc:O02058]
WBGene00008727	F13A7.12	49.7774	-1.23363	0.475312	-2.59542	0.0094476	0.0873521
WBGene00015797	C15F1.8	43.0822	-1.22197	0.470867	-2.59515	0.00945498	0.0873714
WBGene00011833	T19B10.5	430.111	-0.756087	0.291384	-2.59481	0.00946419	0.0874077
WBGene00011203	R10E4.7	103.184	-1.09412	0.42203	-2.59252	0.0095277	0.087902
WBGene00017264	F08F3.8	19.406	-1.25696	0.484847	-2.59249	0.00952834	0.087902
WBGene00001303	emo-1	9839.82	0.962739	0.371457	2.59179	0.00954783	0.0879578	Protein transport protein Sec61 subunit gamma [Source:UniProtKB/Swiss-Prot;Acc:Q19967]
WBGene00011489	T05F1.2	5256.01	-1.35436	0.522512	-2.59201	0.00954156	0.0879578
WBGene00020824	T26A8.1	2304.13	-0.94647	0.365193	-2.5917	0.00955034	0.0879578
WBGene00000801	cars-2	396.813	-0.804867	0.310602	-2.59131	0.0095611	0.0879589
WBGene00004183	prk-2	459.716	0.576662	0.222535	2.59133	0.00956067	0.0879589	Serine/threonine-protein kinase prk-2 [Source:UniProtKB/Swiss-Prot;Acc:Q20443]
WBGene00000036	ace-2	427.129	1.07197	0.413722	2.59104	0.00956855	0.0879785	Carboxylic ester hydrolase [Source:UniProtKB/TrEMBL;Acc:G5EDV9]
WBGene00009305	F32A7.4	1445.17	-0.888996	0.343243	-2.58999	0.00959788	0.0881992
WBGene00006408	tag-18	1902.24	0.716701	0.276824	2.58902	0.00962503	0.0883995
WBGene00019938	R07E4.5	711.601	-0.779025	0.300925	-2.58877	0.00963197	0.0884142
WBGene00013826	Y116F11B.10	28.1156	-1.78815	0.690893	-2.58818	0.00964853	0.0884968
WBGene00219313	C17E4.20	1121.96	-1.0203	0.394232	-2.58807	0.00965167	0.0884968
WBGene00011224	R10H10.6	545.145	0.663931	0.256646	2.58695	0.00968295	0.0887345
WBGene00016553	mir-8199	31.0703	-1.22481	0.473522	-2.58659	0.00969301	0.0887774
WBGene00004810	skr-4	1268.33	0.819115	0.316758	2.58593	0.00971159	0.0888984	SKp1 Related (Ubiquitin ligase complex component) [Source:UniProtKB/TrEMBL;Acc:Q9U1Y9]
WBGene00017247	F08D12.3	1231.62	1.16077	0.449309	2.58346	0.00978142	0.0894881
WBGene00011269	R17.3	154.789	0.906629	0.351111	2.58217	0.00981815	0.0897248
WBGene00012195	bath-34	96.6886	-1.43484	0.555641	-2.58232	0.009814	0.0897248	BTB and MATH domain-containing protein 34 [Source:UniProtKB/Swiss-Prot;Acc:Q9XUM6]
WBGene00015518	C06E1.1	1638.56	0.688929	0.266903	2.5812	0.00984585	0.0898291
WBGene00017930	F29G9.1	13.5596	-2.2017	0.852851	-2.58158	0.00983506	0.0898291
WBGene00219422	Y52B11A.20	35.2306	-0.914151	0.354141	-2.58132	0.00984242	0.0898291
WBGene00017632	F20B6.9	16.7684	-2.03862	0.789861	-2.58098	0.00985196	0.0898353
WBGene00008508	F01G10.5	26.6097	-1.84138	0.713538	-2.58063	0.00986209	0.0898781
WBGene00019780	M60.4	4785.52	0.976358	0.378522	2.57939	0.00989738	0.09015
WBGene00002148	gon-14	2138.71	-1.0641	0.412589	-2.57907	0.00990663	0.0901847
WBGene00007453	fbxa-98	363.669	0.688568	0.267012	2.57879	0.00991459	0.0902075	F-box A protein [Source:UniProtKB/TrEMBL;Acc:Q9U3Q8]
WBGene00008336	C55A6.7	272.981	1.03932	0.403169	2.57788	0.00994093	0.0903974
WBGene00044032	ceh-99	174.271	-0.938874	0.364317	-2.57708	0.00996388	0.0905563	C. Elegans Homeobox [Source:UniProtKB/TrEMBL;Acc:Q5FC44]
WBGene00006397	taf-13	1956.1	0.723475	0.280822	2.57628	0.00998702	0.0906856	TAF (TBP-associated transcription factor) family [Source:UniProtKB/TrEMBL;Acc:Q17957]
WBGene00007914	mys-4	821.994	-1.45261	0.563897	-2.57602	0.00999455	0.0906856	Histone acetyltransferase [Source:UniProtKB/TrEMBL;Acc:Q95ZX6]
WBGene00015100	B0280.2	17.103	-1.2598	0.489014	-2.5762	0.00998914	0.0906856
WBGene00004360	rib-1	1243.56	-0.65492	0.254346	-2.57492	0.0100263	0.0907475	Exostosin-1 homolog [Source:UniProtKB/Swiss-Prot;Acc:O01704]
WBGene00004743	scm-1	4673.09	0.642187	0.249365	2.57529	0.0100157	0.0907475	Secretory carrier-associated membrane protein [Source:UniProtKB/TrEMBL;Acc:G5EED5]
WBGene00007683	C18E9.2	2362.86	-0.728049	0.282737	-2.575	0.0100239	0.0907475
WBGene00008824	F14H3.5	305.806	-1.33969	0.520245	-2.57512	0.0100206	0.0907475
WBGene00016383	zgpa-1	456.291	-1.26809	0.492492	-2.57483	0.0100288	0.0907475	Zinc finger G-PAtch domain-containing protein homolog [Source:UniProtKB/TrEMBL;Acc:Q18418]
WBGene00011647	noca-1	3883.69	-1.22263	0.475054	-2.57367	0.0100627	0.0910042	Non-centrosomal microtubule array protein 1 [Source:UniProtKB/Swiss-Prot;Acc:G5EEK3]
WBGene00013126	mltn-2	39.8285	-1.18727	0.461639	-2.57187	0.0101152	0.0913796	MLt-TeN (Mlt-10) related [Source:UniProtKB/TrEMBL;Acc:Q9U257]
WBGene00020341	T08B1.4	377.87	0.731773	0.284517	2.57199	0.0101117	0.0913796
WBGene00043994	C07A9.12	158.882	0.639752	0.248829	2.57105	0.010139	0.0915444
WBGene00000177	aqp-9	216.54	0.805045	0.313219	2.57023	0.0101631	0.0916875	AQuaPorin or aquaglyceroporin related [Source:UniProtKB/TrEMBL;Acc:E5QCH4]
WBGene00019237	H24G06.1	936.097	-1.00844	0.392369	-2.57013	0.0101659	0.0916875
WBGene00006750	unc-10	297.457	-0.625197	0.24328	-2.56987	0.0101737	0.0917072	Rab-3-interacting molecule unc-10 [Source:UniProtKB/Swiss-Prot;Acc:Q22366]
WBGene00012315	immt-2	3360.27	-0.739679	0.28793	-2.56896	0.0102005	0.0918993	MICOS complex subunit MIC60-2 [Source:UniProtKB/Swiss-Prot;Acc:Q9XXN2]
WBGene00000831	ctl-2	2233.01	0.805938	0.313815	2.5682	0.0102229	0.0920003	Peroxisomal catalase 1 [Source:UniProtKB/Swiss-Prot;Acc:Q27487]
WBGene00001591	glc-1	837.708	0.804586	0.313267	2.56837	0.0102179	0.0920003	Glutamate-gated chloride channel alpha [Source:UniProtKB/Swiss-Prot;Acc:G5EBR3]
WBGene00000969	dhs-5	819.743	0.493115	0.19214	2.56644	0.0102749	0.0920683	Uncharacterized oxidoreductase dhs-5 [Source:UniProtKB/Swiss-Prot;Acc:Q10130]
WBGene00004986	spp-1	3034.86	1.00525	0.391659	2.56664	0.0102689	0.0920683	SaPosin-like Protein family [Source:UniProtKB/TrEMBL;Acc:Q22291]
WBGene00007789	C28A5.2	590.801	-0.813304	0.31684	-2.56692	0.0102605	0.0920683
WBGene00011252	R11H6.4	245.14	0.925984	0.360805	2.56644	0.010275	0.0920683
WBGene00013426	Y66A7A.7	196.071	1.28298	0.499769	2.56715	0.0102539	0.0920683
WBGene00014001	pyk-2	1546.3	0.420892	0.163971	2.56687	0.0102622	0.0920683	Pyruvate kinase [Source:UniProtKB/TrEMBL;Acc:D3YT37]
WBGene00016865	ets-9	1297.83	0.483639	0.188372	2.56746	0.0102445	0.0920683	ETS class transcription factor [Source:UniProtKB/TrEMBL;Acc:Q7JNQ1]
WBGene00022736	ZK418.7	432.747	0.491078	0.19133	2.56666	0.0102683	0.0920683
WBGene00012566	fbxa-211	144.263	-0.779818	0.303907	-2.56597	0.0102887	0.0920914	F-box A protein [Source:UniProtKB/TrEMBL;Acc:Q9U2N5]
WBGene00015507	C06A6.2	459.607	-0.792208	0.308721	-2.56609	0.0102851	0.0920914
WBGene00004411	rpc-1	3063.52	-0.969458	0.378197	-2.56337	0.0103662	0.0927349	DNA-directed RNA polymerase subunit [Source:UniProtKB/TrEMBL;Acc:Q18566]
WBGene00002194	kin-6	43.6523	-1.57444	0.614345	-2.56279	0.0103834	0.0928103	Non-specific protein-tyrosine kinase [Source:UniProtKB/TrEMBL;Acc:Q8I4A8]
WBGene00006736	ulp-1	2607.43	-1.19415	0.465973	-2.56271	0.0103858	0.0928103	Sentrin-specific protease [Source:UniProtKB/Swiss-Prot;Acc:Q09353]
WBGene00012535	Y37A1A.2	289.914	0.636768	0.248527	2.56217	0.0104021	0.0928558
WBGene00086569	F38A6.5	185.762	0.768447	0.299911	2.56225	0.0103997	0.0928558
WBGene00004800	sir-2.1	1727.36	-1.03869	0.405508	-2.56146	0.0104234	0.0929955	NAD-dependent protein deacetylase sir-2.1 [Source:UniProtKB/Swiss-Prot;Acc:Q21921]
WBGene00004820	skr-14	2127.53	0.767444	0.299672	2.56095	0.0104387	0.0930817	SKp1 Related (Ubiquitin ligase complex component) [Source:UniProtKB/TrEMBL;Acc:Q9N3U9]
WBGene00008213	C49F8.1	136.157	0.588914	0.230066	2.55976	0.0104746	0.0933512
WBGene00013567	Y75B12B.1	4140.92	-0.969215	0.378696	-2.55935	0.0104869	0.0934108
WBGene00002264	lec-1	16529	0.873395	0.341449	2.5579	0.0105305	0.0936898	32 kDa beta-galactoside-binding lectin [Source:UniProtKB/Swiss-Prot;Acc:P36573]
WBGene00011608	T08D2.3	64.3512	-1.00752	0.393882	-2.55792	0.01053	0.0936898
WBGene00219659	anr-36	30.7711	-1.0565	0.413059	-2.55775	0.0105352	0.0936898	NA
WBGene00002297	ect-2	3587.77	-1.06648	0.417046	-2.55724	0.0105508	0.0937723	ECT2 (Mammalian Rho GEF) homolog [Source:UniProtKB/TrEMBL;Acc:Q22590]
WBGene00044517	Y32G9A.13	27.967	-1.06184	0.415257	-2.55707	0.0105558	0.0937723
WBGene00022255	Y73B6BL.36	107.994	0.656504	0.256775	2.55673	0.0105661	0.0938127
WBGene00006223	str-179	42.8407	-1.18257	0.462723	-2.55569	0.0105979	0.0939392
WBGene00007926	C34C12.7	376.958	0.834802	0.326666	2.55552	0.010603	0.0939392
WBGene00011691	T10C6.10	367.41	-0.503224	0.196913	-2.55556	0.0106018	0.0939392
WBGene00016416	C34F11.5	63.0725	-1.9542	0.764646	-2.55569	0.0105976	0.0939392	Tyrosine-protein kinase [Source:UniProtKB/TrEMBL;Acc:Q18462]
WBGene00010822	M01G12.9	982.723	-1.09445	0.428632	-2.55336	0.010669	0.0944735
WBGene00001843	hgo-1	2480.89	0.798764	0.312859	2.55311	0.0106766	0.0944898	Homogentisate 1,2-dioxygenase [Source:UniProtKB/Swiss-Prot;Acc:Q9Y041]
WBGene00015430	C04E7.3	20.9113	-1.85998	0.728779	-2.55218	0.010705	0.0946904
WBGene00013224	Y55D9A.2	1289.6	-1.26856	0.497097	-2.55194	0.0107126	0.0946923
WBGene00050935	Y37H2A.16	30.273	-1.2318	0.482718	-2.55181	0.0107166	0.0946923
WBGene00001087	dpy-28	2120.72	-0.841669	0.329972	-2.55073	0.0107498	0.0948839	Condensin complex subunit 1 [Source:UniProtKB/Swiss-Prot;Acc:Q9U2M1]
WBGene00002218	klp-6	29.2478	-1.20018	0.47052	-2.55076	0.0107489	0.0948839	Kinesin-like protein [Source:UniProtKB/TrEMBL;Acc:G5EFQ4]
WBGene00011893	T21C9.6	369.685	-0.859511	0.337063	-2.55	0.0107723	0.095032
WBGene00001872	him-14	316.137	-1.17827	0.462118	-2.54972	0.0107808	0.0950562	MutS protein homolog him-14 [Source:UniProtKB/Swiss-Prot;Acc:Q23405]
WBGene00017251	fbxb-105	109.429	0.910527	0.357206	2.54903	0.0108024	0.0951957	F-box B protein [Source:UniProtKB/TrEMBL;Acc:P91231]
WBGene00019407	lect-2	1073.96	0.646722	0.253809	2.54806	0.0108322	0.0954079	LECT-2; LEukocyte cell-derived ChemoTaxin 2 (LECT-2) homolog [Source:UniProtKB/TrEMBL;Acc:Q21241]
WBGene00010552	K04C1.2	559.507	-0.807513	0.317016	-2.54723	0.0108583	0.0955357
WBGene00015437	scrm-3	75.9007	0.818974	0.321515	2.54723	0.010858	0.0955357	Phospholipid scramblase [Source:UniProtKB/TrEMBL;Acc:G5EG07]
WBGene00017054	gstk-2	160.609	0.608713	0.239057	2.5463	0.010887	0.0957374	Glutathione s-transferase kappa 2 [Source:UniProtKB/Swiss-Prot;Acc:Q18973]
WBGene00016636	perm-2	49841.4	0.960723	0.377426	2.54546	0.0109134	0.0959188	PERMeable eggshell [Source:UniProtKB/TrEMBL;Acc:O44145]
WBGene00008113	C46C2.5	2076.21	0.971498	0.381755	2.54482	0.0109334	0.0959921
WBGene00017481	F15B10.3	1308.79	0.853621	0.335412	2.54499	0.010928	0.0959921
WBGene00008149	pyp-1	9776.99	0.514949	0.202427	2.54388	0.0109629	0.0962005	Probable inorganic pyrophosphatase 1 [Source:UniProtKB/Swiss-Prot;Acc:Q18680]
WBGene00013321	Y57G11C.31	700.069	0.599538	0.235786	2.54272	0.0109993	0.096468
WBGene00194852	T28A8.8	144.599	-0.873714	0.343659	-2.54239	0.0110098	0.0965097
WBGene00003806	npp-20	3984.22	0.689864	0.271389	2.54198	0.0110226	0.0965706	Protein SEC13 homolog [Source:UniProtKB/Swiss-Prot;Acc:Q9N4A7]
WBGene00009270	F30F8.1	3057.91	-0.934886	0.367822	-2.54168	0.0110321	0.096602
WBGene00009237	F28H7.3	2995.81	0.690798	0.271892	2.54071	0.0110628	0.0967712
WBGene00017989	nol-10	2377.4	-1.06941	0.420911	-2.5407	0.0110631	0.0967712	NucleOLar protein [Source:UniProtKB/TrEMBL;Acc:Q19974]
WBGene00009086	F23D12.2	171.433	-1.22682	0.483036	-2.5398	0.0110914	0.0969169
WBGene00017933	F29G9.7	95.1866	-1.0714	0.421831	-2.53989	0.0110888	0.0969169
WBGene00009217	spe-45	11.5547	-1.55871	0.613902	-2.53902	0.0111163	0.0969806
WBGene00017995	F32E10.8	28.3509	1.18653	0.467297	2.53913	0.011113	0.0969806
WBGene00044191	F43D2.6	486.291	0.682804	0.268887	2.53937	0.0111052	0.0969806
WBGene00219736	linc-20	29.0433	-1.133	0.446304	-2.53862	0.0111289	0.0970393	NA
WBGene00021909	Y55B1BL.1	2238.38	1.0394	0.409673	2.53715	0.0111759	0.0973971
WBGene00018833	ztf-1	733.615	-1.19692	0.471975	-2.53599	0.0112131	0.0976705	Zinc finger transcription factor family protein 1 [Source:UniProtKB/Swiss-Prot;Acc:P34450]
WBGene00007975	gls-1	2959.19	-0.765107	0.301781	-2.5353	0.011235	0.0977521	Germline survival defective-1 [Source:UniProtKB/Swiss-Prot;Acc:Q8I4M5]
WBGene00012351	W09C5.1	6076.48	-0.381692	0.15056	-2.53514	0.0112402	0.0977521
WBGene00016332	C32F10.4	1081.37	-0.616479	0.243153	-2.53536	0.0112333	0.0977521
WBGene00011131	R07H5.11	87.3079	-0.983973	0.388316	-2.53395	0.0112785	0.0979822
WBGene00014938	mdt-9	3081.38	0.726058	0.286525	2.53401	0.0112764	0.0979822	MeDiaTor [Source:UniProtKB/TrEMBL;Acc:Q0KHC0]
WBGene00004324	rde-2	1077.9	-1.09783	0.433344	-2.5334	0.0112962	0.0980325
WBGene00015133	mrpl-11	2923.95	0.485122	0.191481	2.53353	0.011292	0.0980325	Probable 39S ribosomal protein L11, mitochondrial [Source:UniProtKB/Swiss-Prot;Acc:P34264]
WBGene00010750	K10D11.6	249.35	0.662064	0.261369	2.53306	0.0113071	0.0980375
WBGene00012325	W07A12.8	29.9049	0.957297	0.377928	2.53302	0.0113086	0.0980375
WBGene00004979	sph-1	1395.26	0.596955	0.235724	2.53244	0.0113273	0.0980411	SynaptoPHysin [Source:UniProtKB/TrEMBL;Acc:O44511]
WBGene00016405	hecd-1	8965.84	-0.659031	0.260244	-2.53235	0.01133	0.0980411	HECtD1 ubiquitin ligase homolog [Source:UniProtKB/TrEMBL;Acc:V6CJX7]
WBGene00017828	F26F4.6	889.547	-0.790688	0.312257	-2.53217	0.0113358	0.0980411
WBGene00022381	ubxn-2	4013.77	0.465813	0.183964	2.53208	0.0113387	0.0980411	UBX-containing protein in Nematodes [Source:UniProtKB/TrEMBL;Acc:Q86DD7]
WBGene00044205	T13F3.8	41.6729	-1.77992	0.702798	-2.53263	0.0113212	0.0980411
WBGene00017050	D2024.1	11.3752	-1.97104	0.778587	-2.53156	0.0113557	0.0980835
WBGene00018602	F48D6.4	6498.18	0.811927	0.320791	2.53102	0.0113732	0.0980835
WBGene00019894	R05F9.11	296.783	-0.998565	0.394505	-2.53119	0.0113677	0.0980835
WBGene00020832	T26C12.2	11.7806	-1.77422	0.700931	-2.53123	0.0113662	0.0980835
WBGene00044903	K03H1.13	621.35	-0.686577	0.271229	-2.53135	0.0113624	0.0980835
WBGene00003647	nhr-57	427.281	0.596117	0.235626	2.52993	0.0114086	0.0981332	Nuclear hormone receptor family member nhr-57 [Source:UniProtKB/Swiss-Prot;Acc:O16425]
WBGene00004199	prx-14	1365.45	-0.989631	0.391112	-2.5303	0.0113966	0.0981332	PeRoXisome assembly factor [Source:UniProtKB/TrEMBL;Acc:Q93930]
WBGene00010279	letm-1	2652.83	-0.818544	0.323524	-2.53008	0.0114035	0.0981332	LETM1 (Leucine zipper, EF-hand, TransMembrane mitochondrial protein) homolog [Source:UniProtKB/TrEMBL;Acc:Q9XVM0]
WBGene00017607	F19F10.11	1534.76	-1.08386	0.428374	-2.53017	0.0114006	0.0981332
WBGene00021081	pals-33	46.4889	-1.55676	0.615214	-2.53044	0.0113918	0.0981332	Protein containing ALS2cr12 (ALS2CR12) domain [Source:UniProtKB/TrEMBL;Acc:O01622]
WBGene00009915	F52A8.1	7657.52	0.740616	0.292851	2.52899	0.0114393	0.0982549
WBGene00017404	F12E12.3	13.1643	-1.39616	0.552031	-2.52913	0.0114345	0.0982549
WBGene00018566	F47E1.2	265.938	0.708498	0.280155	2.52895	0.0114406	0.0982549	Solute carrier organic anion transporter family member [Source:UniProtKB/TrEMBL;Acc:Q20538]
WBGene00000520	cku-80	1525.54	-1.21554	0.480805	-2.52814	0.0114668	0.0983896	ATP-dependent DNA helicase II subunit 2 [Source:UniProtKB/TrEMBL;Acc:Q21829]
WBGene00015791	C15C7.5	3120.93	0.754801	0.298565	2.5281	0.0114682	0.0983896
WBGene00007958	C35C5.9	283.037	1.25699	0.497251	2.52789	0.0114751	0.0983983
WBGene00017811	F26A1.13	713.653	-1.09975	0.435159	-2.52724	0.0114962	0.0985279
WBGene00018293	F41E6.12	445.529	0.752391	0.297746	2.52696	0.0115056	0.0985572
WBGene00016138	flh-2	694.351	-0.83457	0.330339	-2.52641	0.0115236	0.0986605	FLYWCH zinc finger transcription factor homolog [Source:UniProtKB/TrEMBL;Acc:Q18225]
WBGene00012109	T28A8.3	1131.2	-1.19746	0.474163	-2.52542	0.011556	0.0988868
WBGene00013839	fbxa-32	65.1554	0.753101	0.298253	2.52504	0.0115686	0.0989433	F-box A protein [Source:UniProtKB/TrEMBL;Acc:A4F329]
WBGene00015129	sdz-1	89.8515	1.20997	0.479335	2.52426	0.0115943	0.0991104	Skn-1 dependent zygotic transcript 1 protein [Source:UniProtKB/Swiss-Prot;Acc:P34259]
WBGene00022822	ZK813.3	23619	0.955169	0.378423	2.52408	0.0116001	0.0991104
WBGene00006579	tlk-1	8292.22	-0.993845	0.393848	-2.52342	0.0116218	0.0991421	Serine/threonine-protein kinase tousled-like 1 [Source:UniProtKB/Swiss-Prot;Acc:P34314]
WBGene00007168	B0393.3	3131.55	-1.24386	0.4929	-2.52355	0.0116176	0.0991421
WBGene00007421	C07H4.1	319.152	0.858446	0.34019	2.52343	0.0116217	0.0991421
WBGene00002583	let-363	2893.55	-1.00952	0.400288	-2.52197	0.0116699	0.0995012	Target of rapamycin homolog [Source:UniProtKB/Swiss-Prot;Acc:Q95Q95]
WBGene00006977	zif-1	2306.69	-1.25442	0.497753	-2.52016	0.0117302	0.0999631	Zinc finger-interacting factor 1 [Source:UniProtKB/Swiss-Prot;Acc:P34482]
WBGene00008476	E03H4.8	1749.78	0.535851	0.212655	2.51981	0.0117417	0.10001
WBGene00010163	F56H6.2	43.1425	-1.10271	0.437763	-2.51897	0.01177	0.100199
WBGene00013711	Y106G6G.2	18.5789	-1.46975	0.583709	-2.51795	0.0118041	0.100438
WBGene00010753	K10G4.4	10.0581	-2.45958	0.977089	-2.51726	0.0118273	0.100566
WBGene00015859	C16D9.4	279.182	0.692516	0.275126	2.51709	0.0118329	0.100566
WBGene00016992	zhit-1	629.458	-0.842511	0.334734	-2.51695	0.0118374	0.100566	Zinc finger, HIT-type [Source:UniProtKB/TrEMBL;Acc:O44161]
WBGene00001832	hcp-4	3878.34	-0.949925	0.377566	-2.51592	0.0118723	0.100635	CENP-C-like protein HCP-4; HoloCentric chromosome binding Protein [Source:UniProtKB/TrEMBL;Acc:G5EDA3]
WBGene00002889	let-765	4697.93	-0.796556	0.316595	-2.51601	0.0118691	0.100635	Notch signaling pathway homolog-1 [Source:UniProtKB/TrEMBL;Acc:O01737]
WBGene00009728	sdz-19	18.29	1.16482	0.462998	2.51581	0.0118759	0.100635	SKN-1 Dependent Zygotic transcript [Source:UniProtKB/TrEMBL;Acc:O62242]
WBGene00012268	W04G5.8	41.8482	-1.30012	0.516752	-2.51595	0.0118711	0.100635
WBGene00018518	F46H5.2	837.857	-0.647136	0.257173	-2.51634	0.011858	0.100635
WBGene00009642	F42G4.5	420.578	0.84825	0.337288	2.51491	0.0119062	0.100737
WBGene00018118	F36H12.2	222.089	-0.441866	0.175682	-2.51515	0.0118981	0.100737
WBGene00019593	K09F6.10	52.0546	-1.37979	0.548626	-2.515	0.0119033	0.100737
WBGene00012675	Y39B6A.13	1181.86	-0.434798	0.172926	-2.51435	0.0119251	0.100845
WBGene00018417	F44E2.3	1156.26	-0.771258	0.306871	-2.5133	0.0119608	0.101096
WBGene00009444	F35G12.11	2195.35	0.897016	0.356958	2.51294	0.0119728	0.101124	Enhancer of rudimentary homolog [Source:UniProtKB/TrEMBL;Acc:Q20057]
WBGene00017374	ttr-41	5765.54	1.05452	0.419655	2.51284	0.0119764	0.101124	TransThyretin-Related family domain [Source:UniProtKB/TrEMBL;Acc:Q86NH9]
WBGene00220178	Y52D3.2	229.979	0.593211	0.236109	2.51245	0.0119897	0.101185
WBGene00007557	C14A4.6	707.342	0.87981	0.350329	2.51138	0.0120259	0.101386
WBGene00021202	Y17G9B.5	1034.63	-1.16871	0.465344	-2.5115	0.0120221	0.101386
WBGene00002010	hsp-6	11025	-0.588358	0.234301	-2.51112	0.0120348	0.10141	Heat shock 70 kDa protein F, mitochondrial [Source:UniProtKB/Swiss-Prot;Acc:P11141]
WBGene00003160	mdf-1	2915.88	-0.857095	0.341468	-2.51003	0.012072	0.101644	MAD (Yeast Mitosis arrest DeFicient) related; MDF-1 [Source:UniProtKB/TrEMBL;Acc:G5EFM0]
WBGene00008944	F19B2.5	2299.61	-1.32538	0.528066	-2.50988	0.0120771	0.101644
WBGene00015598	fbxa-163	490.88	-1.35672	0.540576	-2.50977	0.012081	0.101644	F-box A protein [Source:UniProtKB/TrEMBL;Acc:O17196]
WBGene00011630	T08G11.3	18.0625	-1.21057	0.482417	-2.5094	0.0120938	0.1017
WBGene00012251	clec-49	937.296	0.979494	0.390362	2.5092	0.0121006	0.101705	C-type LECtin [Source:UniProtKB/TrEMBL;Acc:Q9XUL6]
WBGene00001946	his-72	26179.1	0.855326	0.340945	2.50869	0.0121178	0.101726	Histone H3.3 type 2 [Source:UniProtKB/Swiss-Prot;Acc:Q9U281]
WBGene00012450	Y17D7B.2	53.0503	-0.923244	0.368033	-2.50859	0.0121215	0.101726
WBGene00020852	nhr-228	410.084	0.519657	0.207127	2.50888	0.0121116	0.101726	Nuclear Hormone Receptor family [Source:UniProtKB/TrEMBL;Acc:H2L0M9]
WBGene00006556	tbx-37	140.836	0.815598	0.325287	2.50732	0.012165	0.102016	Putative T-box protein 37 [Source:UniProtKB/Swiss-Prot;Acc:Q9U2C9]
WBGene00017858	F27C1.11	43.8647	-1.38359	0.55188	-2.50705	0.0121743	0.102016
WBGene00022067	Y67D8C.3	436.262	-0.824772	0.328982	-2.50704	0.0121746	0.102016
WBGene00008921	ctf-4	3508.14	-1.32225	0.527566	-2.50631	0.0121998	0.102175
WBGene00008945	F19B2.6	96.4639	-0.97374	0.388651	-2.50543	0.0122302	0.102378
WBGene00044898	let-383	155.764	0.744948	0.297446	2.50448	0.0122632	0.102603
WBGene00003091	lys-2	25131	1.13377	0.452738	2.50424	0.0122714	0.10262	Lysozyme-like protein 2 [Source:UniProtKB/Swiss-Prot;Acc:O62416]
WBGene00003074	lars-2	848.631	-1.14226	0.45621	-2.50381	0.0122864	0.102693	Leucyl Amino-acyl tRNA Synthetase [Source:UniProtKB/TrEMBL;Acc:Q23511]
WBGene00002214	klc-1	2311.72	-1.36413	0.545018	-2.50291	0.0123178	0.102904	Kinesin Light Chain [Source:UniProtKB/TrEMBL;Acc:Q21592]
WBGene00004254	pxf-1	2416.59	-0.873172	0.348903	-2.50262	0.0123278	0.102921	Rap guanine nucleotide exchange factor [Source:UniProtKB/Swiss-Prot;Acc:G5EDB9]
WBGene00019279	K01A2.4	82.2579	-1.37333	0.548788	-2.50249	0.0123324	0.102921
WBGene00004881	smg-3	2032.94	-1.06394	0.425347	-2.50135	0.0123721	0.103192	SMG-3; Suppressor with Morphological effect on Genitalia [Source:UniProtKB/TrEMBL;Acc:G5EDT8]
WBGene00006839	unc-115	2924.91	0.50539	0.202073	2.50103	0.0123834	0.103192	Putative actin-binding protein UNC-115 [Source:UniProtKB/TrEMBL;Acc:O77133]
WBGene00010525	K03B8.8	159.075	0.601174	0.240394	2.50079	0.0123917	0.103192
WBGene00012277	ccch-3	854.326	-0.947259	0.378776	-2.50084	0.0123899	0.103192	CCCH-type zinc finger putative transcription factor [Source:UniProtKB/TrEMBL;Acc:Q23170]
WBGene00013275	btb-14	551.114	0.835188	0.33405	2.50018	0.0124129	0.103192	BTB/POZ domain-containing protein Y57A10B.3 [Source:UniProtKB/Swiss-Prot;Acc:Q9XWH8]
WBGene00015012	bath-20	35.6019	-0.909303	0.363657	-2.50044	0.0124039	0.103192	BTB and MATH domain containing [Source:UniProtKB/TrEMBL;Acc:Q3V5H9]
WBGene00015113	B0281.6	35.6947	-1.09662	0.438636	-2.50006	0.0124171	0.103192
WBGene00018856	F55A4.4	23.1963	-1.43384	0.573427	-2.50048	0.0124026	0.103192
WBGene00045251	F54F7.9	111.031	0.928495	0.371405	2.49995	0.012421	0.103192
WBGene00004112	pqn-22	1338.48	-0.605713	0.242332	-2.49952	0.0124363	0.103226	Prion-like-(Q/N-rich)-domain-bearing protein [Source:UniProtKB/TrEMBL;Acc:V6CJC4]
WBGene00010977	R02D5.3	339.968	1.03364	0.413543	2.49948	0.0124375	0.103226
WBGene00008043	C40H1.8	159.634	0.790509	0.316391	2.49852	0.0124714	0.103403
WBGene00022762	ZK546.5	760.286	-1.1256	0.450505	-2.49853	0.0124709	0.103403
WBGene00015751	C14A11.6	43.7849	-0.880297	0.352454	-2.49762	0.012503	0.103608
WBGene00020948	era-1	5061.74	-0.947271	0.379293	-2.49746	0.0125086	0.103608	Embryonic mRna (mRNA) Anterior [Source:UniProtKB/TrEMBL;Acc:O45146]
WBGene00010174	F56H9.2	5080.95	-0.726564	0.291025	-2.49657	0.0125402	0.103678
WBGene00012005	37043	2906.24	0.427327	0.171163	2.4966	0.0125391	0.103678	Transcription factor jun-1 [Source:UniProtKB/Swiss-Prot;Acc:G5ECU7]
[truncated: 44,571 more rows]

## Sheet: nsun-1 RNAi
wormbase_ID	gene_name	baseMean	log2FoldChange	lfcSE	stat	pvalue	padj	description
WBGene00014772	F56D5.4	944.475	-2.3676	0.224519	-10.5452	5.34707e-26	9.97015e-22
WBGene00010960	atp-6	25509	-4.58437	0.453377	-10.1116	4.90707e-24	4.57486e-20	ATP synthase subunit a [Source:UniProtKB/Swiss-Prot;Acc:P24888]
WBGene00010959	nduo-1	13951.5	-4.05667	0.409177	-9.91424	3.60999e-23	2.24373e-19	NADH-ubiquinone oxidoreductase chain 1 [Source:UniProtKB/Swiss-Prot;Acc:P24887]
WBGene00021050	W05H9.3	11283.6	-2.28412	0.233391	-9.78665	1.28486e-22	5.98936e-19
WBGene00014505	T05E11.9	2356.88	-4.23543	0.469511	-9.02095	1.86461e-19	6.9535e-16
WBGene00011599	T07G12.8	306.27	-2.94368	0.336196	-8.75584	2.02586e-18	6.29569e-15
WBGene00003784	nos-2	1440.68	-3.00063	0.34584	-8.67636	4.08653e-18	1.08854e-14	NanOS related [Source:UniProtKB/TrEMBL;Acc:Q23406]
WBGene00044638	F23A7.8	782.88	-5.42947	0.62726	-8.65586	4.89227e-18	1.14027e-14
WBGene00044412	F40H6.6	73.7279	-2.69369	0.32001	-8.41751	3.84585e-17	7.96774e-14
WBGene00004179	prg-2	3231.52	-1.89998	0.227205	-8.36243	6.14417e-17	1.14564e-13	Piwi-like protein [Source:UniProtKB/TrEMBL;Acc:Q17567]
WBGene00010967	nduo-5	9858.48	-2.93108	0.358747	-8.17031	3.07595e-16	5.21401e-13	NADH-ubiquinone oxidoreductase chain 5 [Source:UniProtKB/Swiss-Prot;Acc:P24896]
WBGene00014987	ZK637.6	680.972	-2.16504	0.27204	-7.95856	1.74056e-15	2.70454e-12
WBGene00010961	nduo-2	3824.45	-4.56931	0.577042	-7.9185	2.40398e-15	3.44805e-12	NADH-ubiquinone oxidoreductase chain 2 [Source:UniProtKB/Swiss-Prot;Acc:P24889]
WBGene00010957	nduo-6	1902.24	-5.18132	0.656686	-7.8901	3.01942e-15	4.02143e-12	NADH-ubiquinone oxidoreductase chain 6 [Source:UniProtKB/Swiss-Prot;Acc:P24885]
WBGene00019134	F59H6.3	62.099	-2.70006	0.347121	-7.77843	7.34293e-15	9.12775e-12
WBGene00010963	nduo-4	10125.8	-3.71325	0.47801	-7.76814	7.96442e-15	9.28153e-12	NADH-ubiquinone oxidoreductase chain 4 [Source:UniProtKB/Swiss-Prot;Acc:P24892]
WBGene00021763	Y51F10.2	6969.05	-2.38633	0.311105	-7.6705	1.71333e-14	1.87922e-11
WBGene00006650	tts-1	11282	-4.92109	0.643963	-7.64188	2.14074e-14	2.21757e-11
WBGene00045238	rpr-1	59.5127	-5.7722	0.774792	-7.45001	9.33349e-14	9.15959e-11
WBGene00219571	linc-15	104.095	-3.60034	0.485522	-7.4154	1.21254e-13	1.13045e-10
WBGene00014294	C53C7.5	1719.38	-2.22185	0.30296	-7.33379	2.23739e-13	1.98659e-10
WBGene00009069	F23A7.4	534.93	-4.45154	0.607744	-7.32468	2.39462e-13	2.02955e-10
WBGene00017717	F22F4.4	409.247	-3.08568	0.422252	-7.30768	2.71785e-13	2.20335e-10
WBGene00010958	ndfl-4	226.658	-5.32826	0.740861	-7.19198	6.38574e-13	4.96119e-10	NADH-ubiquinone oxidoreductase chain 4L [Source:UniProtKB/Swiss-Prot;Acc:P24886]
WBGene00004898	snb-2	861.476	1.26155	0.177086	7.12395	1.04877e-12	7.82211e-10	SyNaptoBrevin related [Source:UniProtKB/TrEMBL;Acc:Q19767]
WBGene00017952	F31E3.6	60.6455	-3.25503	0.460219	-7.07278	1.51856e-12	1.08904e-09
WBGene00010962	ctc-3	32905.6	-2.7617	0.39305	-7.02633	2.12031e-12	1.44707e-09	Cytochrome c oxidase subunit 3 [Source:UniProtKB/Swiss-Prot;Acc:P24891]
WBGene00023318	K07D4.1	81.0379	-2.13618	0.304173	-7.02291	2.17301e-12	1.44707e-09
WBGene00018452	F45D11.5	85.2289	-2.96478	0.425663	-6.96509	3.282e-12	2.11021e-09
WBGene00001394	fat-2	13723.6	-1.83953	0.266488	-6.90285	5.09694e-12	3.10115e-09	Delta(12) fatty acid desaturase fat-2 [Source:UniProtKB/Swiss-Prot;Acc:G5EGA5]
WBGene00019831	R02F2.1	20141.1	-2.07393	0.300516	-6.90122	5.15583e-12	3.10115e-09
WBGene00219912	F22H10.10	58.0011	-5.45202	0.798984	-6.82369	8.87298e-12	5.17018e-09	NA
WBGene00012592	Y38E10A.14	111.182	-3.00971	0.444311	-6.77387	1.25382e-11	7.03338e-09
WBGene00014309	F07H5.5	13318.8	-2.28979	0.338196	-6.7706	1.2825e-11	7.03338e-09
WBGene00043068	F32E10.9	300.232	-2.01123	0.29748	-6.76089	1.37147e-11	7.30641e-09
WBGene00044728	Y53F4B.45	334.795	-3.60342	0.540812	-6.66298	2.68336e-11	1.38983e-08
WBGene00044493	Y54G2A.50	324.244	-2.40601	0.362005	-6.64634	3.00477e-11	1.51424e-08
WBGene00014307	F07H5.3	2333.16	-3.56587	0.538042	-6.62749	3.41445e-11	1.59164e-08
WBGene00018204	F39F10.4	45.0416	-2.73051	0.411826	-6.63026	3.35088e-11	1.59164e-08
WBGene00219770	linc-40	56.1092	-4.64816	0.700994	-6.63082	3.33835e-11	1.59164e-08	NA
WBGene00045410	E01G4.7	124.782	-2.05392	0.310212	-6.62101	3.56752e-11	1.62244e-08
WBGene00045509	T07D10.8	268.437	-2.14067	0.32503	-6.58605	4.51677e-11	2.00523e-08
WBGene00219709	linc-37	39.6799	-3.58194	0.547694	-6.54005	6.14978e-11	2.66671e-08	NA
WBGene00010174	F56H9.2	5080.95	-1.89269	0.291029	-6.50345	7.84959e-11	3.32644e-08
WBGene00009055	F22D6.14	59.0519	-2.87746	0.443585	-6.48683	8.76623e-11	3.63234e-08
WBGene00021658	Y48G1A.2	1201.51	-2.4253	0.376797	-6.43664	1.2215e-10	4.95133e-08
WBGene00023069	rncs-1	1410.18	-5.15963	0.805839	-6.40281	1.52543e-10	6.05174e-08
WBGene00014941	Y67H2A.9	188.566	-2.39621	0.374629	-6.39623	1.59258e-10	6.18649e-08
WBGene00018862	wago-2	1899.29	-1.58914	0.248669	-6.39057	1.65268e-10	6.28896e-08
WBGene00014472	MTCE.33	1674.31	-3.21992	0.506853	-6.35276	2.11484e-10	7.88665e-08
WBGene00003783	nos-1	1244.83	-1.88327	0.296682	-6.34777	2.18464e-10	7.9872e-08	NanOS related [Source:UniProtKB/TrEMBL;Acc:Q09597]
WBGene00011131	R07H5.11	87.3079	-2.49317	0.395384	-6.30569	2.86906e-10	1.02878e-07
WBGene00010966	nduo-3	2493.3	-4.29622	0.682733	-6.29268	3.12037e-10	1.09778e-07	NADH-ubiquinone oxidoreductase chain 3 [Source:UniProtKB/Swiss-Prot;Acc:P24895]
WBGene00011898	T21C9.13	2202.79	-2.16334	0.345486	-6.26173	3.80722e-10	1.31462e-07
WBGene00010964	ctc-1	75100.6	-2.42836	0.388271	-6.25428	3.9935e-10	1.35387e-07	Cytochrome c oxidase subunit 1 [Source:UniProtKB/Swiss-Prot;Acc:P24893]
WBGene00219838	C28H8.14	195.434	-2.48267	0.397327	-6.24841	4.14647e-10	1.38063e-07	NA
WBGene00045366	Y17D7C.3	161.423	-1.60615	0.257539	-6.23654	4.47351e-10	1.46339e-07
WBGene00013535	gyg-3	58.8655	-2.76692	0.4452	-6.215	5.13244e-10	1.64999e-07
WBGene00015495	C05E11.6	48.8776	-2.85503	0.459729	-6.21025	5.29002e-10	1.67183e-07
WBGene00255596	Y37B11A.8	263.551	-2.36508	0.381659	-6.19685	5.76032e-10	1.79011e-07
WBGene00014836	T09F5.12	424.275	-1.72735	0.279539	-6.17928	6.4396e-10	1.93666e-07
WBGene00022951	C30E1.9	1355.82	-1.79431	0.290368	-6.17946	6.43213e-10	1.93666e-07
WBGene00013726	Y106G6H.16	336.539	-1.8511	0.302214	-6.12513	9.06116e-10	2.68182e-07
WBGene00010640	K07F5.16	213.444	-1.82463	0.298323	-6.11629	9.57771e-10	2.79041e-07
WBGene00003509	mxl-1	914.88	-1.60566	0.263263	-6.09906	1.06695e-09	3.06066e-07	MAX-like-1 homolog; MaX-Like [Source:UniProtKB/TrEMBL;Acc:G5EEH5]
WBGene00045086	Y43B11AR.7	137.554	-3.17519	0.523013	-6.07096	1.2715e-09	3.59217e-07
WBGene00206459	Y80D4G.1	357.324	-2.43032	0.401896	-6.04713	1.47446e-09	4.1034e-07
WBGene00016553	mir-8199	31.0703	-2.97304	0.49454	-6.01172	1.83564e-09	5.03345e-07
WBGene00013247	Y57A10A.2	453.248	-1.22036	0.203477	-5.99753	2.00346e-09	5.41397e-07
WBGene00010507	K02E2.6	155.671	-1.84426	0.307675	-5.99417	2.04525e-09	5.44797e-07
WBGene00017077	D2096.10	127.54	-1.84522	0.30956	-5.96079	2.51023e-09	6.59235e-07
WBGene00013141	Y53C12A.6	74.1475	-1.73848	0.292516	-5.9432	2.79512e-09	7.23859e-07
WBGene00219700	linc-6	91.2973	-3.03622	0.518611	-5.85452	4.78403e-09	1.22196e-06	NA
WBGene00012819	Y43F8B.9	100.275	-2.76395	0.473332	-5.83934	5.24076e-09	1.32053e-06
WBGene00001842	her-1	46.8711	-2.69304	0.461713	-5.83271	5.45334e-09	1.35577e-06	HERmaphrodization of XO animals [Source:UniProtKB/TrEMBL;Acc:Q65ZB2]
WBGene00045507	F10A3.17	1940.56	1.02253	0.176146	5.80505	6.43482e-09	1.57873e-06
WBGene00010569	scbp-2	296.751	-1.4679	0.253013	-5.8017	6.56441e-09	1.58961e-06	SECIS (SeCis) Binding Protein homolog [Source:UniProtKB/TrEMBL;Acc:Q95ZR7]
WBGene00014955	Y102A5C.6	1660.71	-2.05129	0.35453	-5.78596	7.20993e-09	1.72354e-06
WBGene00010102	F55C9.5	23.2007	-3.27189	0.566316	-5.77751	7.58158e-09	1.78944e-06
WBGene00022970	CD4.10	212.788	-2.70919	0.469316	-5.77262	7.80466e-09	1.81907e-06
WBGene00008172	C48B4.9	905.425	-1.5851	0.276068	-5.74171	9.37226e-09	2.13617e-06
WBGene00195017	R144.15	23.0312	-7.42782	1.29375	-5.74132	9.3943e-09	2.13617e-06
WBGene00077593	C49G7.12	945.37	-1.69469	0.296247	-5.72051	1.06204e-08	2.38588e-06
WBGene00018664	bath-11	68.0662	-2.01364	0.352198	-5.71737	1.08185e-08	2.40144e-06
WBGene00016332	C32F10.4	1081.37	-1.38941	0.243207	-5.71289	1.11077e-08	2.43663e-06
WBGene00010965	ctc-2	25948	-3.13908	0.55076	-5.69955	1.20123e-08	2.60443e-06	Cytochrome c oxidase subunit 2 [Source:UniProtKB/Swiss-Prot;Acc:P24894]
WBGene00009286	zipt-1	2837.42	-1.5813	0.278589	-5.67611	1.37789e-08	2.95311e-06	Zrt (ZRT), Irt-(IRT-) like Protein Transporter [Source:UniProtKB/TrEMBL;Acc:O62192]
WBGene00195016	ZC155.8	14.8471	-7.27869	1.2828	-5.67407	1.39444e-08	2.95462e-06
WBGene00014871	Y37H9A.5	70.1308	-2.13173	0.376366	-5.66397	1.47908e-08	3.09875e-06
WBGene00012675	Y39B6A.13	1181.86	-0.974082	0.173621	-5.61039	2.01869e-08	4.18228e-06
WBGene00010079	F55A11.6	587.03	0.921719	0.164968	5.58726	2.30674e-08	4.62831e-06
WBGene00014746	F27D4.3	81.6893	-1.84753	0.33051	-5.58994	2.27144e-08	4.62831e-06
WBGene00020028	R12C12.8	323.537	-1.60595	0.287437	-5.58714	2.30845e-08	4.62831e-06
WBGene00013193	Y54E2A.8	1050.62	-1.56736	0.281267	-5.57247	2.5115e-08	4.98186e-06
WBGene00019789	M116.2	315.041	-2.43444	0.439794	-5.53541	3.10509e-08	6.07228e-06
WBGene00219803	C06A1.12	454.115	-1.46743	0.265157	-5.53421	3.12635e-08	6.07228e-06	NA
WBGene00014454	MTCE.7	1940.24	-2.95414	0.535645	-5.5151	3.48579e-08	6.70063e-06
WBGene00003395	mom-2	4623.54	-1.64408	0.298266	-5.51214	3.54492e-08	6.74475e-06
WBGene00219736	linc-20	29.0433	-2.54611	0.462923	-5.50007	3.79638e-08	7.15024e-06	NA
WBGene00014820	R09B3.6	172.132	-1.30227	0.237906	-5.47387	4.40317e-08	8.21016e-06
WBGene00206355	C34C6.10	22.3866	-2.73939	0.500972	-5.46814	4.5478e-08	8.39588e-06
WBGene00022205	Y73B3A.3	83.9247	-1.77024	0.324009	-5.46356	4.66669e-08	8.51998e-06
WBGene00185076	Y7A9A.79	22.8572	-4.81984	0.882421	-5.46206	4.70641e-08	8.51998e-06
WBGene00000829	ctb-1	40819.1	-2.81808	0.517048	-5.45033	5.02775e-08	9.01417e-06	Cytochrome b [Source:UniProtKB/Swiss-Prot;Acc:P24890]
WBGene00007476	C09E9.1	819.393	-0.995844	0.18328	-5.43347	5.52676e-08	9.81447e-06
WBGene00012358	W09D6.5	1128.77	-1.94208	0.357745	-5.42866	5.67801e-08	9.98794e-06
WBGene00020167	T02G5.11	40.6982	-2.0868	0.385523	-5.41291	6.20084e-08	1.08057e-05
WBGene00014308	F07H5.4	812.222	-2.48955	0.463417	-5.37217	7.77962e-08	1.34314e-05
WBGene00019509	K07H8.9	883.322	-1.72241	0.322053	-5.34824	8.88146e-08	1.5193e-05
WBGene00021795	Y52E8A.2	980.974	-2.10838	0.394529	-5.34406	9.08887e-08	1.54065e-05
WBGene00220049	R106.7	182.184	-2.55044	0.477565	-5.3405	9.26909e-08	1.55704e-05	NA
WBGene00014852	W02A11.6	53.7972	-2.16419	0.405546	-5.33647	9.4774e-08	1.57782e-05
WBGene00016822	C50E3.11	728.976	-2.12076	0.397729	-5.33217	9.70467e-08	1.59862e-05
WBGene00022791	ZK686.1	1615.44	-2.40961	0.45201	-5.33088	9.7738e-08	1.59862e-05
WBGene00009702	F44F4.3	55.8563	-1.77129	0.33275	-5.32318	1.01968e-07	1.65329e-05
WBGene00020896	T28D9.4	1639.88	-1.37522	0.259509	-5.29933	1.16226e-07	1.85226e-05
WBGene00023036	F39E9.10	115.753	-1.82304	0.343935	-5.30053	1.15466e-07	1.85226e-05
WBGene00008563	F07H5.13	839.921	-2.11635	0.399985	-5.29107	1.216e-07	1.92149e-05
WBGene00001229	eif-3.F	7765.85	0.676504	0.128476	5.2656	1.39733e-07	2.18947e-05	Eukaryotic translation initiation factor 3 subunit F [Source:UniProtKB/Swiss-Prot;Acc:Q18967]
WBGene00194852	T28A8.8	144.599	-1.8432	0.35027	-5.26221	1.42335e-07	2.21165e-05
WBGene00219816	C14E2.12	57.2931	-5.37575	1.02223	-5.25885	1.4496e-07	2.23382e-05	NA
WBGene00001396	fat-4	7518.17	-1.0515	0.200299	-5.24965	1.52385e-07	2.32266e-05	Delta(5) fatty acid desaturase fat-4 [Source:UniProtKB/Swiss-Prot;Acc:G5EG11]
WBGene00022441	Y110A2AL.4	358.705	-3.39014	0.645908	-5.24865	1.53216e-07	2.32266e-05
WBGene00001499	fsn-1	4139.33	-1.48479	0.283296	-5.24112	1.59604e-07	2.39998e-05	F-box/SPRY domain-containing protein 1 [Source:UniProtKB/Swiss-Prot;Acc:Q18223]
WBGene00017235	F08B4.3	213.177	-1.54315	0.295555	-5.22119	1.77773e-07	2.65181e-05
WBGene00009595	F40F12.7	1415.66	1.1471	0.219931	5.21573	1.83091e-07	2.67298e-05
WBGene00016101	C25E10.12	675.276	0.768685	0.147346	5.21689	1.81953e-07	2.67298e-05	UPF0046 protein C25E10.12 [Source:UniProtKB/Swiss-Prot;Acc:Q18161]
WBGene00017134	EEED8.3	2923.29	-1.63038	0.312614	-5.21533	1.83493e-07	2.67298e-05
WBGene00018108	F36H5.10	89.601	-2.17627	0.418464	-5.20061	1.98638e-07	2.87116e-05
WBGene00014994	ZK1225.7	54.9774	-1.99487	0.383942	-5.19577	2.03878e-07	2.92424e-05
WBGene00008944	F19B2.5	2299.61	-2.73464	0.528376	-5.17555	2.27238e-07	3.23442e-05
WBGene00020329	bath-26	205.669	1.15706	0.224108	5.16295	2.43085e-07	3.43376e-05	BTB and MATH domain containing [Source:UniProtKB/TrEMBL;Acc:O76611]
WBGene00194650	C36A4.14	198.541	-1.94552	0.377128	-5.15877	2.4858e-07	3.48498e-05
WBGene00255594	Y48G1BL.8	53.0823	-2.69099	0.522515	-5.15007	2.60393e-07	3.62334e-05
WBGene00021205	Y17G9B.8	465.02	-1.00077	0.194748	-5.13877	2.76537e-07	3.81949e-05
WBGene00012452	Y17D7B.4	330.691	-1.93508	0.377555	-5.12529	2.97086e-07	4.07314e-05
WBGene00000191	arl-7	62.0082	-2.25657	0.441087	-5.11593	3.12196e-07	4.24905e-05
WBGene00022036	Y65B4BL.4	1818.51	-1.45712	0.284918	-5.11418	3.15105e-07	4.25757e-05
WBGene00195253	H16D19.5	33.5492	-2.05368	0.403114	-5.09455	3.49578e-07	4.68937e-05
WBGene00001644	gly-19	278.713	1.06553	0.210261	5.06764	4.02769e-07	5.28875e-05	GLY-19; GLYcosylation related [Source:UniProtKB/TrEMBL;Acc:G5EBK7]
WBGene00012732	Y40B1A.1	781.963	-2.3095	0.45571	-5.06791	4.02208e-07	5.28875e-05
WBGene00021018	W04B5.1	49.4293	-2.50811	0.49492	-5.06772	4.02615e-07	5.28875e-05
WBGene00000374	cyp-31A1	453.694	-1.73913	0.343475	-5.06332	4.12016e-07	5.37234e-05
WBGene00017263	F08F3.6	1627.08	-1.83717	0.363227	-5.05793	4.23834e-07	5.48807e-05
WBGene00219758	linc-11	128.501	-1.67194	0.330793	-5.05433	4.31904e-07	5.55399e-05	NA
WBGene00012368	fbxa-93	168.613	-1.20969	0.239483	-5.05124	4.38957e-07	5.60602e-05
WBGene00235158	Y37E3.30	35.4663	-2.91159	0.577691	-5.04004	4.65437e-07	5.90377e-05
WBGene00021345	Y37B11A.3	77.6087	-2.35709	0.468356	-5.0327	4.8362e-07	6.09296e-05
WBGene00077772	T02G6.10	35.3874	-2.45787	0.490815	-5.00774	5.50725e-07	6.89183e-05
WBGene00000298	cat-4	1381.54	0.999485	0.199681	5.0054	5.57451e-07	6.92949e-05	GTP cyclohydrolase 1 [Source:UniProtKB/Swiss-Prot;Acc:Q19980]
WBGene00011591	T07F10.5	110.952	-1.78812	0.358104	-4.99329	5.93593e-07	7.32989e-05
WBGene00010475	K01F9.2	281.64	0.969987	0.194347	4.991	6.00673e-07	7.36336e-05
WBGene00016788	C49G7.10	820.75	-1.27614	0.255747	-4.98987	6.04202e-07	7.36336e-05
WBGene00077457	Y39B6A.49	143.155	-1.84646	0.371112	-4.97549	6.50838e-07	7.88021e-05
WBGene00219749	linc-30	20.4009	-2.63495	0.530568	-4.96628	6.82482e-07	8.21003e-05	NA
WBGene00010546	K03H1.11	522.553	-1.64672	0.331874	-4.96188	6.98151e-07	8.34469e-05
WBGene00015746	C13F10.7	4859.65	-1.36126	0.274759	-4.9544	7.25549e-07	8.5624e-05
WBGene00219728	linc-16	38.2678	-2.20372	0.444798	-4.95442	7.25474e-07	8.5624e-05	NA
WBGene00077787	T05E12.10	18.3153	-2.92117	0.589778	-4.953	7.30777e-07	8.56986e-05
WBGene00015716	sox-4	482.728	1.02554	0.207665	4.93843	7.87547e-07	9.17787e-05	SOX (Mammalian SRY box) family [Source:UniProtKB/TrEMBL;Acc:Q17922]
WBGene00021375	Y37E11B.2	77.4466	-1.6346	0.331173	-4.93578	7.98307e-07	9.24549e-05
WBGene00194836	C25H3.18	192.004	-2.96835	0.604915	-4.90705	9.24576e-07	0.000106418
WBGene00017971	F32A5.8	754.516	1.09073	0.222871	4.89399	9.88094e-07	0.000113031
WBGene00004789	sgk-1	1011.89	0.928465	0.189835	4.8909	1.00378e-06	0.000114125	Serine/threonine-protein kinase sgk-1 [Source:UniProtKB/Swiss-Prot;Acc:Q2PJ68]
WBGene00017742	nfyc-1	1346.11	-0.989583	0.202727	-4.88137	1.05352e-06	0.000119055	Nuclear transcription factor Y subunit gamma [Source:UniProtKB/TrEMBL;Acc:O17072]
WBGene00001091	drh-2	488.18	-2.58171	0.529289	-4.87769	1.07337e-06	0.000120567
WBGene00000801	cars-2	396.813	-1.5183	0.311729	-4.87058	1.1127e-06	0.000124236
WBGene00017304	F09F7.7	1815.05	-1.07349	0.22117	-4.85368	1.21192e-06	0.000134509	DNA N6-methyl adenine demethylase [Source:UniProtKB/Swiss-Prot;Acc:Q8MNT9]
WBGene00013611	Y102A5C.2	210.823	-1.7036	0.351258	-4.84999	1.23466e-06	0.000136222
WBGene00015640	C09E7.6	140.741	-2.08747	0.431482	-4.83789	1.31224e-06	0.00014393
WBGene00010555	K04C1.5	902.019	-1.96876	0.407223	-4.83461	1.33408e-06	0.000145469
WBGene00044399	F11F1.8	6.89845	-6.62882	1.37156	-4.83305	1.34456e-06	0.00014576
WBGene00018216	F40A3.1	651.789	0.922892	0.191539	4.81829	1.4479e-06	0.000156055
WBGene00019799	M151.7	380.779	-1.73534	0.360437	-4.81455	1.47529e-06	0.000158093
WBGene00023068	rpl-41.2	32224.8	-3.35349	0.696866	-4.81224	1.49249e-06	0.000159023	Ribosomal Protein, Large subunit [Source:UniProtKB/TrEMBL;Acc:A0A0M6VD87]
WBGene00013567	Y75B12B.1	4140.92	-1.81569	0.378662	-4.79502	1.62656e-06	0.000172323
WBGene00002187	kgb-1	1413.72	0.851929	0.177758	4.79262	1.64615e-06	0.000173413	GLH-binding kinase 1 [Source:UniProtKB/Swiss-Prot;Acc:O44408]
WBGene00010050	F54D5.4	10296.9	1.06067	0.2214	4.79072	1.66181e-06	0.000174079
WBGene00015744	C13F10.5	1206.75	-1.13309	0.236624	-4.78857	1.67975e-06	0.000174975
WBGene00003740	nlp-2	77.3818	-1.60472	0.335287	-4.7861	1.7005e-06	0.000176153	Neuropeptide-Like Protein [Source:UniProtKB/TrEMBL;Acc:Q22739]
WBGene00017153	E_BE45912.2	202.416	-1.41112	0.295057	-4.78255	1.73087e-06	0.000178308
WBGene00020164	T02G5.4	365.765	-1.08654	0.227777	-4.77019	1.8405e-06	0.00018856
WBGene00012760	Y41C4A.17	14.4655	-5.93866	1.24527	-4.76898	1.85157e-06	0.000188657
WBGene00012854	Y44A6D.3	465.339	1.1114	0.23329	4.76402	1.89775e-06	0.000192312
WBGene00022377	gpx-4	48.2628	-1.43769	0.301956	-4.76125	1.92401e-06	0.000193919	Glutathione peroxidase [Source:UniProtKB/TrEMBL;Acc:Q9N2X2]
WBGene00003607	nhr-8	699.409	0.896309	0.188353	4.75866	1.94878e-06	0.000194315	Nuclear hormone receptor family member nhr-8 [Source:UniProtKB/Swiss-Prot;Acc:Q9XYB7]
WBGene00077443	Y71A12B.19	23.2165	-1.9468	0.409106	-4.75868	1.94863e-06	0.000194315
WBGene00008246	C50H2.13	118.072	1.35012	0.284413	4.74706	2.06397e-06	0.000203624
WBGene00044258	Y57G11C.51	277.427	-1.99402	0.419965	-4.74806	2.05372e-06	0.000203624
WBGene00018831	F54E7.9	580.179	-1.38605	0.292417	-4.73998	2.13734e-06	0.000209752
WBGene00020236	lgc-1	15.5722	-2.61322	0.552927	-4.72616	2.28808e-06	0.000223369	Ligand-Gated ion Channel [Source:UniProtKB/TrEMBL;Acc:O16426]
WBGene00006826	unc-97	2355.73	0.634625	0.134513	4.71796	2.38217e-06	0.000231344	LIM domain-containing protein unc-97 [Source:UniProtKB/Swiss-Prot;Acc:P50464]
WBGene00020218	T04G9.7	5899.96	1.18924	0.252349	4.71269	2.44465e-06	0.000236181
WBGene00022508	ZC53.1	260.268	-1.66583	0.355002	-4.69244	2.6997e-06	0.000259477
WBGene00009656	F43G6.3	560.708	-1.64459	0.351311	-4.6813	2.85061e-06	0.000272577
WBGene00016178	mesp-1	7691.62	-1.78984	0.382538	-4.67886	2.88481e-06	0.00027444	MEiotic SPindle [Source:UniProtKB/TrEMBL;Acc:Q18282]
WBGene00011741	T12G3.6	2068.38	-2.0006	0.428392	-4.67003	3.01149e-06	0.000285037
WBGene00194681	F40D4.16	42.2072	-3.44435	0.737894	-4.66781	3.04422e-06	0.000286679
WBGene00014643	B0391.8	174.389	-1.40985	0.303016	-4.65273	3.27565e-06	0.000306923
WBGene00004243	puf-7	1178.38	-1.58088	0.339935	-4.65053	3.31077e-06	0.000308663	Pumilio domain-containing protein 7 [Source:UniProtKB/Swiss-Prot;Acc:O44169]
WBGene00009582	F40F9.5	754.566	0.745672	0.160464	4.64697	3.36847e-06	0.000309401
WBGene00219699	linc-22	533.253	-1.09445	0.235478	-4.64778	3.35523e-06	0.000309401	NA
WBGene00235269	F59E12.15	97.1453	-1.52353	0.327758	-4.64834	3.34624e-06	0.000309401
WBGene00021000	W03F9.2	357.079	-0.996501	0.215103	-4.63268	3.6097e-06	0.000329934
WBGene00022474	zig-9	1131.07	0.844135	0.182263	4.6314	3.63199e-06	0.000330351	2 (Zwei) IG domain protein [Source:UniProtKB/TrEMBL;Acc:Q95Y79]
WBGene00009505	F37B12.3	2798.72	-1.03872	0.224601	-4.62472	3.75105e-06	0.000339524
WBGene00194679	T26C11.9	49.3414	-1.59335	0.345008	-4.6183	3.86897e-06	0.000348507
WBGene00194683	T20G5.15	125.383	-1.82056	0.394601	-4.61368	3.95603e-06	0.000354635
WBGene00004384	rnp-1	2623.71	-1.06667	0.231305	-4.61153	3.99718e-06	0.00035661	RNA-binding protein rnp-1 [Source:UniProtKB/Swiss-Prot;Acc:Q10667]
WBGene00014954	Y102A5C.5	636.831	-1.92009	0.417257	-4.60169	4.19083e-06	0.000372106
WBGene00018986	cdo-1	920.872	1.10599	0.240481	4.59909	4.24336e-06	0.000374984	Cysteine dioxygenase 1 [Source:UniProtKB/Swiss-Prot;Acc:Q20893]
WBGene00013734	Y111B2A.10	1064.29	-1.14535	0.249238	-4.59539	4.31935e-06	0.000378115
WBGene00019303	K02D10.3	30.2222	-1.83701	0.399736	-4.59556	4.3158e-06	0.000378115
WBGene00008936	papl-1	1142.63	0.818682	0.178416	4.58861	4.462e-06	0.000388677	Purple acid phosphatase [Source:UniProtKB/TrEMBL;Acc:Q19553]
WBGene00050939	C05G5.7	41.4441	-3.32598	0.724978	-4.58769	4.48169e-06	0.000388677
WBGene00011320	T01C3.3	3854.34	-1.57946	0.344531	-4.58437	4.55354e-06	0.00039308
WBGene00003941	pbo-1	1275.52	0.980912	0.214128	4.58096	4.6285e-06	0.00039771
WBGene00016496	C37C3.2	12583.5	0.715821	0.15638	4.57744	4.70697e-06	0.000401553	Eukaryotic translation initiation factor 5 [Source:UniProtKB/Swiss-Prot;Acc:Q22918]
WBGene00219849	C36C9.10	15.4766	-6.02773	1.31695	-4.57703	4.71629e-06	0.000401553	NA
WBGene00021448	Y39D8A.1	199.081	-1.92696	0.421296	-4.57388	4.78769e-06	0.000405779
WBGene00013218	Y54G11A.9	349.18	-1.47577	0.322882	-4.5706	4.86319e-06	0.000410313
WBGene00195169	Y50D4A.6	35.1475	-2.08923	0.457428	-4.56734	4.9396e-06	0.000414882
WBGene00000416	ced-2	3149.28	-1.19681	0.262184	-4.56478	5.00009e-06	0.000417693	Cell death abnormality protein 2 [Source:UniProtKB/Swiss-Prot;Acc:Q9NHC3]
WBGene00021239	Y20F4.4	1053.18	-1.00146	0.219424	-4.56404	5.01788e-06	0.000417693
WBGene00005528	sri-16	47.6719	-2.37515	0.520709	-4.56137	5.08208e-06	0.000421158	Serpentine Receptor, class I [Source:UniProtKB/TrEMBL;Acc:O62177]
WBGene00017818	F26D11.1	237.525	-2.00962	0.440696	-4.5601	5.1129e-06	0.000421837	Gluconokinase [Source:UniProtKB/TrEMBL;Acc:O61968]
WBGene00219710	anr-45	20.2757	-3.54175	0.777995	-4.55241	5.30356e-06	0.00043564	NA
WBGene00015747	C13G5.2	1680.63	-1.21975	0.268312	-4.546	5.46739e-06	0.000447127
WBGene00010833	M03B6.1	273.928	1.42328	0.313267	4.54333	5.53719e-06	0.000450858
WBGene00017748	F23F1.7	226.785	1.14668	0.252607	4.53939	5.64159e-06	0.000457361
WBGene00023067	rpl-41.1	2649.73	-2.84424	0.627019	-4.53613	5.72963e-06	0.000462488	Ribosomal Protein, Large subunit [Source:UniProtKB/TrEMBL;Acc:A0A0M6VD87]
WBGene00010913	M110.3	1433.34	-0.885455	0.195409	-4.5313	5.8621e-06	0.000469119
WBGene00044218	F23H12.10	57.0378	-1.62224	0.357946	-4.53209	5.84032e-06	0.000469119
WBGene00008174	C48B4.11	1201.49	-1.12123	0.247655	-4.52739	5.97161e-06	0.00047584
WBGene00022561	btb-13	38.7629	-1.81379	0.400885	-4.52447	6.05484e-06	0.000480048	BTB (Broad/complex/Tramtrack/Bric a brac) domain protein [Source:UniProtKB/TrEMBL;Acc:P91542]
WBGene00195233	F31E9.11	70.7596	-2.6414	0.583898	-4.52373	6.0759e-06	0.000480048
WBGene00017417	F13B6.2	216.109	1.23472	0.273013	4.52254	6.11007e-06	0.00048071
WBGene00022198	Y71H2B.11	173.468	-1.27572	0.28218	-4.52095	6.15621e-06	0.000482306
WBGene00010185	F57A10.4	339.896	-1.65629	0.367291	-4.50946	6.49918e-06	0.000507045
WBGene00016262	C30F12.3	106.684	-1.41115	0.313152	-4.50628	6.59749e-06	0.00051257
WBGene00017985	neg-1	1552.16	-1.45743	0.323631	-4.50336	6.68865e-06	0.000516762	Negative Effect on Gut development [Source:UniProtKB/TrEMBL;Acc:A0A168H505]
WBGene00019244	H25P19.1	1007.39	-0.832196	0.184818	-4.50278	6.70688e-06	0.000516762
WBGene00003626	nhr-32	583.736	0.904999	0.201282	4.49618	6.91852e-06	0.000530876	Nuclear Hormone Receptor family [Source:UniProtKB/TrEMBL;Acc:Q21372]
WBGene00022515	ttr-48	4347.89	0.947426	0.210882	4.49269	7.03289e-06	0.00053744	TransThyretin-Related family domain [Source:UniProtKB/TrEMBL;Acc:Q23378]
WBGene00010242	F58D5.2	180.11	-2.53754	0.564942	-4.49168	7.06629e-06	0.000537788
WBGene00185118	K02E2.11	104.84	-2.99212	0.666359	-4.49025	7.11384e-06	0.000539206
WBGene00044897	M01D7.9	17.3938	-3.6473	0.813264	-4.48477	7.2993e-06	0.000550054
WBGene00219609	linc-7	416.058	-2.26612	0.505347	-4.48428	7.31596e-06	0.000550054
WBGene00011860	T20D3.8	1506.96	-1.06428	0.237668	-4.47799	7.53487e-06	0.000564237
WBGene00010605	K06G5.1	24091	1.0838	0.242176	4.47526	7.63176e-06	0.000569207
WBGene00219493	C18D4.12	17.2165	-2.97694	0.665576	-4.47272	7.72292e-06	0.000573711
WBGene00001393	fat-1	9329.72	-1.27086	0.284298	-4.47017	7.81587e-06	0.000576027	Omega-3 fatty acid desaturase fat-1 [Source:UniProtKB/Swiss-Prot;Acc:Q9NEQ0]
WBGene00001606	gln-5	5183.87	-1.65617	0.370428	-4.47095	7.78726e-06	0.000576027	GLutamiNe synthetase (Glutamate-ammonia ligase) [Source:UniProtKB/TrEMBL;Acc:Q9XVU2]
WBGene00020530	T15B12.1	706.314	0.815219	0.182475	4.46757	7.91123e-06	0.000580759
WBGene00021186	Y9D1A.1	132.307	-2.46354	0.552378	-4.45988	8.2004e-06	0.000599626
WBGene00011331	T01E8.1	504.96	0.990392	0.222218	4.45685	8.31731e-06	0.000604139
WBGene00012217	W02H3.1	174.316	1.37961	0.309566	4.4566	8.32692e-06	0.000604139
WBGene00003658	nhr-68	1647.22	0.785742	0.176573	4.44994	8.58933e-06	0.000618365	Nuclear Hormone Receptor family [Source:UniProtKB/TrEMBL;Acc:H8ESE6]
WBGene00021841	Y54E10BR.2	1277.14	-1.6579	0.372542	-4.45023	8.57779e-06	0.000618365
WBGene00000088	aex-5	434.084	1.13568	0.255511	4.44476	8.79899e-06	0.000631023	Endoprotease aex-5 [Source:UniProtKB/Swiss-Prot;Acc:P91863]
WBGene00016590	C42C1.12	365.265	-1.4627	0.329363	-4.441	8.95435e-06	0.000639704
WBGene00016061	hpo-15	3357.67	1.4133	0.318356	4.43938	9.02166e-06	0.000642053
WBGene00009191	F27D4.7	957.921	-1.15462	0.260612	-4.43042	9.40485e-06	0.000666779	Vesicle transport protein [Source:UniProtKB/TrEMBL;Acc:Q7YTP0]
WBGene00010163	F56H6.2	43.1425	-1.89108	0.427631	-4.42224	9.7684e-06	0.00068993
WBGene00206415	F59H6.14	41.5163	-1.5506	0.350835	-4.41974	9.88191e-06	0.000695314
WBGene00013659	Y105C5B.20	190.918	-1.40393	0.318021	-4.41459	1.01203e-05	0.000709413
WBGene00045175	C10C6.9	101.454	-2.09257	0.474318	-4.41175	1.0254e-05	0.00071609
WBGene00004567	rrn-2.1	212.497	-2.99352	0.678941	-4.40911	1.03798e-05	0.000719489
WBGene00015111	B0281.4	19.7026	-2.45661	0.557101	-4.40962	1.03551e-05	0.000719489
WBGene00023020	F30H5.4	7.65209	-6.30408	1.43338	-4.39805	1.09229e-05	0.000753673
WBGene00235351	C32B5.18	35.6619	-3.89824	0.886481	-4.39743	1.09538e-05	0.000753673
WBGene00249815	F20D12.12	36.8526	-5.79271	1.31902	-4.39168	1.12477e-05	0.000771045
WBGene00008920	eef-1G	49696.4	-0.950952	0.216711	-4.38811	1.14339e-05	0.000780941	Probable elongation factor 1-gamma [Source:UniProtKB/Swiss-Prot;Acc:P54412]
WBGene00015122	B0302.5	823.487	0.701124	0.159984	4.38246	1.17345e-05	0.000798481
WBGene00021736	wrb-1	1261.84	-0.920152	0.21	-4.38169	1.17764e-05	0.000798481	WRB (Human W(Tryptophan)-Rich Basic nuclear protein) homolog [Source:UniProtKB/TrEMBL;Acc:G4S708]
WBGene00019282	mps-2	147.921	-1.68725	0.385397	-4.37795	1.19802e-05	0.000809359	MPS-3; MiRP K channel accessory Subunit [Source:UniProtKB/TrEMBL;Acc:Q56VR9]
WBGene00013144	Y53C12B.2	5512.75	-0.852127	0.194831	-4.37368	1.22168e-05	0.000822362	RNA-binding protein pno-1 [Source:UniProtKB/Swiss-Prot;Acc:O18216]
WBGene00004163	pqn-82	902.317	-1.30571	0.298639	-4.3722	1.23e-05	0.000824987	Prion-like-(Q/N-rich)-domain-bearing protein [Source:UniProtKB/TrEMBL;Acc:Q9N411]
WBGene00004438	rpl-25.1	12291	-2.01768	0.461599	-4.37107	1.23639e-05	0.000826299	60S ribosomal protein L23a 1 [Source:UniProtKB/Swiss-Prot;Acc:P48162]
WBGene00005832	srw-85	399.642	-1.57212	0.359885	-4.36841	1.25156e-05	0.000833449	Serpentine Receptor, class W [Source:UniProtKB/TrEMBL;Acc:O62077]
WBGene00011748	T13F2.9	68.0469	-5.02899	1.15154	-4.36718	1.25862e-05	0.000835167
WBGene00004481	rps-12	49912.7	-2.95808	0.679268	-4.35481	1.33185e-05	0.000880626	40S ribosomal protein S12 [Source:UniProtKB/Swiss-Prot;Acc:P49196]
WBGene00019079	rpa-4	75.8236	-1.814	0.417196	-4.34807	1.37339e-05	0.000904882	Replication Protein A homolog [Source:UniProtKB/TrEMBL;Acc:Q8I7G2]
WBGene00015134	B0304.2	1416.16	-1.38545	0.319204	-4.34033	1.42269e-05	0.000934063
WBGene00206522	F14D2.19	81.1101	-3.30398	0.762308	-4.33418	1.46308e-05	0.000957212
WBGene00018774	F53G12.9	66.6908	-2.00291	0.463527	-4.32103	1.55306e-05	0.00101253
WBGene00219886	F09E10.15	36.5838	-4.78387	1.10747	-4.31964	1.56285e-05	0.00101536	NA
WBGene00012140	T28F4.5	8534.9	1.34508	0.31155	4.31737	1.57899e-05	0.00102229
WBGene00219575	anr-8	68.0102	-1.65716	0.384045	-4.31503	1.59583e-05	0.00102961
WBGene00008341	ttr-44	3137.43	1.01426	0.235335	4.30985	1.63363e-05	0.00105025	TransThyretin-Related family domain [Source:UniProtKB/TrEMBL;Acc:E3W741]
WBGene00020729	T23E1.2	131.566	-1.37702	0.319561	-4.30912	1.63907e-05	0.00105025
WBGene00195185	F19G12.9	67.5289	-2.91962	0.677944	-4.30658	1.65795e-05	0.0010587
WBGene00004809	skr-3	3176.26	1.02742	0.238767	4.30304	1.68474e-05	0.00107214	SKR-3; SKp1 Related (Ubiquitin ligase complex component) [Source:UniProtKB/TrEMBL;Acc:G5EE67]
WBGene00013095	ing-3	1960.96	-1.00053	0.232933	-4.29536	1.7441e-05	0.00110614	Inhibitor of growth protein [Source:UniProtKB/TrEMBL;Acc:Q9XWJ8]
WBGene00003564	ncs-2	5461.04	0.87223	0.203117	4.29424	1.75296e-05	0.00110653	Neuronal calcium sensor 2 [Source:UniProtKB/Swiss-Prot;Acc:P36609]
WBGene00012569	fbxc-46	101.404	-1.24549	0.290077	-4.29366	1.75752e-05	0.00110653
WBGene00021739	Y50D4A.5	284.317	-1.88873	0.439953	-4.29303	1.76252e-05	0.00110653
WBGene00013976	hizr-1	149.95	1.16769	0.272187	4.29002	1.78654e-05	0.00111498	High zinc activated nuclear receptor protein [Source:UniProtKB/Swiss-Prot;Acc:G5ED47]
WBGene00219908	F20C5.10	377.591	-1.15411	0.269034	-4.28985	1.78794e-05	0.00111498	NA
WBGene00008450	E01G6.2	261.054	0.762181	0.177759	4.28772	1.80518e-05	0.00111852
WBGene00219748	linc-46	23.514	-2.62893	0.613138	-4.28766	1.80562e-05	0.00111852	NA
WBGene00044500	T19E7.6	316.873	0.957318	0.223383	4.28555	1.82284e-05	0.00112545
WBGene00017887	F28B3.6	1642.82	-1.0548	0.246734	-4.27505	1.91094e-05	0.00117595
WBGene00022382	Y94H6A.10	5337.25	0.954403	0.223531	4.26968	1.95758e-05	0.00120069
WBGene00014801	K08E5.1	63.1404	-1.32426	0.310423	-4.26598	1.99023e-05	0.00121672
WBGene00045382	T05E12.8	14.5441	-3.05555	0.716667	-4.26355	2.01202e-05	0.00122556
WBGene00219619	linc-76	119.55	-1.0105	0.237045	-4.26291	2.01784e-05	0.00122556	NA
WBGene00007681	C18D11.3	2962.71	-1.14238	0.26842	-4.25595	2.08167e-05	0.00125945
WBGene00045273	C08A9.11	73.9216	-1.73803	0.408433	-4.25536	2.08715e-05	0.00125945
WBGene00012337	W07G4.3	1759.36	-1.19496	0.281177	-4.24984	2.13928e-05	0.00128674
WBGene00009883	F49C12.14	551.819	0.929651	0.218858	4.24773	2.15943e-05	0.00129053
WBGene00015328	C02B10.3	1001.81	0.830271	0.195431	4.24842	2.15288e-05	0.00129053	EGF-like domain-containing protein C02B10.3 [Source:UniProtKB/Swiss-Prot;Acc:O44443]
WBGene00004423	rpl-11.2	36458.9	-2.08427	0.491217	-4.24307	2.20484e-05	0.00131347	60S ribosomal protein L11-2 [Source:UniProtKB/Swiss-Prot;Acc:Q19162]
WBGene00000437	ceh-13	771.246	0.844606	0.199246	4.239	2.24515e-05	0.00132869	Homeobox protein ceh-13 [Source:UniProtKB/Swiss-Prot;Acc:P17488]
WBGene00006651	tts-2	445.082	-2.65407	0.626238	-4.23811	2.25407e-05	0.00132869
WBGene00008372	D1054.5	245.279	1.40255	0.330975	4.23763	2.25891e-05	0.00132869
WBGene00044217	F23D12.9	35.1191	-1.92541	0.454315	-4.23805	2.2547e-05	0.00132869
WBGene00023429	W08G11.6	8.23035	-6.14048	1.45154	-4.23033	2.33348e-05	0.00136824
WBGene00012530	Y32F6A.5	6114.77	1.15943	0.274518	4.2235	2.40536e-05	0.00140597
WBGene00012196	bath-35	93.5982	-1.10131	0.261208	-4.21622	2.48427e-05	0.00144755	BTB and MATH domain containing [Source:UniProtKB/TrEMBL;Acc:Q9XUM9]
WBGene00021855	Y54F10AR.2	1717.13	-1.18519	0.281186	-4.21495	2.49832e-05	0.0014512
WBGene00195255	H16D19.7	10.2583	-2.69697	0.640998	-4.20745	2.58269e-05	0.00149555
WBGene00044789	T07A9.14	2456.91	-1.21195	0.288229	-4.20481	2.61302e-05	0.00150843
WBGene00022110	Y71F9AL.4	234.768	-1.10462	0.262983	-4.20034	2.66518e-05	0.00153379
WBGene00005552	sri-40	262.872	-1.83096	0.436362	-4.19596	2.71715e-05	0.00155889	Serpentine Receptor, class I [Source:UniProtKB/TrEMBL;Acc:Q9N549]
WBGene00020153	nhr-212	196.629	0.846455	0.201777	4.195	2.72877e-05	0.00156076	Nuclear Hormone Receptor family [Source:UniProtKB/TrEMBL;Acc:H2L0I0]
WBGene00002274	lec-11	879.458	1.10479	0.263668	4.19008	2.78853e-05	0.00158922	Galectin [Source:UniProtKB/TrEMBL;Acc:Q94215]
WBGene00194699	Y43F8B.22	6.67393	-4.17969	0.997656	-4.18951	2.79559e-05	0.00158922
WBGene00009750	F46A8.7	24.6644	-2.13513	0.510379	-4.18341	2.87168e-05	0.00162752
WBGene00017452	bath-29	543.278	-1.49289	0.35711	-4.18046	2.90917e-05	0.00164377	BTB and MATH domain containing [Source:UniProtKB/TrEMBL;Acc:O44805]
WBGene00022250	Y73B6BL.29	401.821	-0.760942	0.182076	-4.17926	2.92456e-05	0.00164747	tRNA pseudouridine synthase [Source:UniProtKB/TrEMBL;Acc:Q95XD5]
WBGene00014156	ZK930.6	125.985	-2.96445	0.71	-4.17528	2.97624e-05	0.00166728
WBGene00015016	bath-14	64.3062	-1.5266	0.365639	-4.17517	2.97761e-05	0.00166728
WBGene00012660	Y39A1A.24	888.149	-0.945823	0.226897	-4.16851	3.06594e-05	0.0017091
WBGene00018035	sek-4	301.276	0.823768	0.197633	4.16816	3.07063e-05	0.0017091	SAPK/ERK kinase [Source:UniProtKB/TrEMBL;Acc:Q58AU8]
WBGene00023458	M02E1.3	23.248	-3.25873	0.78214	-4.16643	3.09403e-05	0.001717
WBGene00015385	C03B8.2	26.0233	-1.93297	0.46457	-4.16077	3.17171e-05	0.00174861
WBGene00017933	F29G9.7	95.1866	-1.77655	0.42703	-4.16024	3.17912e-05	0.00174861
WBGene00043279	F22D6.8	118.725	-1.4767	0.354884	-4.16107	3.16758e-05	0.00174861
WBGene00018335	F42A9.6	1354.9	-1.60406	0.386101	-4.15451	3.2599e-05	0.00178253
WBGene00194680	Y17D7C.6	18.5053	-2.34462	0.564298	-4.15492	3.25396e-05	0.00178253
WBGene00020345	T08B2.4	40.1252	-1.93446	0.466696	-4.14501	3.39797e-05	0.00185259
WBGene00016263	C30F12.4	2102.58	-1.38417	0.334104	-4.14295	3.42873e-05	0.00186083
WBGene00206491	Y73F8A.1173	60.9619	-1.39771	0.337394	-4.14266	3.43304e-05	0.00186083
WBGene00013839	fbxa-32	65.1554	1.30493	0.315196	4.14005	3.47225e-05	0.00187663	F-box A protein [Source:UniProtKB/TrEMBL;Acc:A4F329]
WBGene00016304	fbxc-41	23.922	-1.88661	0.455949	-4.13777	3.50691e-05	0.00188988
WBGene00014613	Y111B2A.25	473.782	-1.00575	0.243409	-4.13192	3.59739e-05	0.0019275
WBGene00016121	C25H3.12	384.62	-1.76567	0.427276	-4.13238	3.59026e-05	0.0019275
WBGene00004408	rla-0	128443	-1.76162	0.426816	-4.12735	3.66968e-05	0.00196059	60S acidic ribosomal protein P0 [Source:UniProtKB/Swiss-Prot;Acc:Q93572]
WBGene00012182	osta-3	1732.59	-1.13983	0.276286	-4.12555	3.69842e-05	0.00196873	Organic solute transporter alpha-like protein 3 [Source:UniProtKB/Swiss-Prot;Acc:Q9XU63]
WBGene00012975	Y48A6C.2	60.4949	-1.90534	0.461891	-4.12508	3.70602e-05	0.00196873
WBGene00017352	F10E7.11	58.0316	-1.90731	0.462649	-4.12259	3.74634e-05	0.0019845
WBGene00003572	ncx-7	373.817	0.854589	0.207394	4.12062	3.77862e-05	0.00199029	Putative sodium/calcium exchanger 7 [Source:UniProtKB/Swiss-Prot;Acc:P34322]
WBGene00219741	linc-77	16.8878	-2.87147	0.696785	-4.12102	3.77192e-05	0.00199029	NA
WBGene00021123	W09G12.9	459.495	-1.13879	0.276844	-4.11348	3.89742e-05	0.00204708
WBGene00017611	F19G12.3	11.322	-3.73469	0.908366	-4.11143	3.93209e-05	0.00205372
WBGene00019998	R10H1.1	337.795	0.843556	0.205158	4.11174	3.92689e-05	0.00205372
WBGene00194908	F22F7.8	143.966	-1.8677	0.454536	-4.10902	3.97335e-05	0.00206947
WBGene00005002	spp-17	3995.61	-2.50569	0.610116	-4.1069	4.00999e-05	0.00207695	SaPosin-like Protein family [Source:UniProtKB/TrEMBL;Acc:Q8WSN3]
WBGene00219399	Y55F3AM.21	69.0961	-1.4131	0.344043	-4.10733	4.00258e-05	0.00207695
WBGene00020684	T22D1.5	4831.53	-1.45778	0.355504	-4.10059	4.12106e-05	0.00212269
WBGene00021199	Y17G9B.2	86.1979	-2.76073	0.673184	-4.101	4.11365e-05	0.00212269
WBGene00017708	F22E5.9	593.31	-1.23446	0.301253	-4.09776	4.1716e-05	0.0021428
WBGene00017240	calu-2	729.91	1.08079	0.263847	4.09627	4.19853e-05	0.00215071	CALUmenin (Calcium-binding protein) homolog [Source:UniProtKB/TrEMBL;Acc:Q9TYS8]
WBGene00020948	era-1	5061.74	-1.55264	0.379404	-4.09232	4.27076e-05	0.00218172	Embryonic mRna (mRNA) Anterior [Source:UniProtKB/TrEMBL;Acc:O45146]
WBGene00015591	cyk-7	3083.19	-1.11747	0.273189	-4.09045	4.30544e-05	0.00219342	Cytokinesis defective protein 7 [Source:UniProtKB/Swiss-Prot;Acc:P34325]
WBGene00021687	Y48G8AL.7	661.014	-1.09337	0.267443	-4.08823	4.34674e-05	0.00219646
WBGene00194641	F47G3.4	371.416	0.826074	0.20206	4.08825	4.34638e-05	0.00219646
WBGene00195060	linc-14	15.9314	-3.77788	0.923967	-4.08876	4.33689e-05	0.00219646
WBGene00019991	R09H3.3	65.2943	-2.48419	0.608436	-4.08291	4.44744e-05	0.00224127
WBGene00007746	C26D10.6	476.571	0.99372	0.243872	4.07476	4.60619e-05	0.00230879
WBGene00194708	Y36E3A.2	37.4814	-2.59067	0.635737	-4.07507	4.60005e-05	0.00230879
WBGene00021520	Y41D4B.18	186.937	-1.62935	0.400013	-4.07325	4.63621e-05	0.00231761
WBGene00016635	C44B11.6	153.536	-2.33218	0.572884	-4.07095	4.68211e-05	0.0023343
WBGene00011303	R166.3	597.113	-1.51893	0.373248	-4.0695	4.71139e-05	0.00234263
WBGene00016030	C24A1.3	601.661	0.680711	0.16772	4.0586	4.93671e-05	0.00244813
WBGene00011691	T10C6.10	367.41	-0.808884	0.199602	-4.05249	5.06751e-05	0.00250634
WBGene00007720	C25D7.10	1287.13	-0.875348	0.216096	-4.05074	5.10549e-05	0.00251844
WBGene00194906	Y53C12A.11	162.423	-1.60728	0.397024	-4.04832	5.15858e-05	0.00253791
WBGene00006839	unc-115	2924.91	0.820114	0.202632	4.04732	5.18084e-05	0.00254216	Putative actin-binding protein UNC-115 [Source:UniProtKB/TrEMBL;Acc:O77133]
WBGene00044167	C36A4.11	25.5916	-1.77369	0.438354	-4.04626	5.20427e-05	0.00254695
WBGene00007440	C08E8.4	1753.14	1.15318	0.285285	4.04218	5.29565e-05	0.00258489
WBGene00013334	nlp-56	275.064	-1.16991	0.289732	-4.0379	5.39317e-05	0.00262561	Neuropeptide-Like Protein [Source:UniProtKB/TrEMBL;Acc:H2FLM4]
WBGene00017741	F23C8.13	87.6538	-1.63164	0.404319	-4.03552	5.44823e-05	0.00264552
WBGene00013446	Y66D12A.21	1440.42	-1.92073	0.47654	-4.03057	5.56411e-05	0.00269477	TM2 domain-containing protein Y66D12A.21 [Source:UniProtKB/Swiss-Prot;Acc:Q95PJ8]
WBGene00014920	Y53F4B.38	12.0471	-3.65929	0.908841	-4.02633	5.66548e-05	0.00272968
WBGene00016825	C50E10.1	60.8335	-4.69965	1.16716	-4.02657	5.65968e-05	0.00272968
WBGene00022221	Y73B3A.20	53.7739	-1.5991	0.397525	-4.02264	5.7549e-05	0.00276561
WBGene00006223	str-179	42.8407	-1.8857	0.469323	-4.01791	5.87166e-05	0.00281325
WBGene00010884	M7.8	148.937	0.944514	0.235105	4.01741	5.88419e-05	0.00281325
WBGene00020834	T27A1.2	112.032	-1.54622	0.385767	-4.00817	6.1191e-05	0.00291807
WBGene00012244	mrps-11	2626.78	-1.19774	0.298999	-4.00585	6.17953e-05	0.00293937	Mitochondrial Ribosomal Protein, Small [Source:UniProtKB/TrEMBL;Acc:Q23155]
WBGene00001044	dnj-26	382.018	-1.5548	0.388853	-3.99844	6.37625e-05	0.00300558	DNaJ domain (Prokaryotic heat shock protein) [Source:UniProtKB/TrEMBL;Acc:Q9U2L4]
WBGene00016799	C50C3.1	1158.88	-1.25809	0.314611	-3.99886	6.36473e-05	0.00300558
WBGene00016865	ets-9	1297.83	0.758126	0.189618	3.99818	6.38319e-05	0.00300558	ETS class transcription factor [Source:UniProtKB/TrEMBL;Acc:Q7JNQ1]
WBGene00219304	F56D6.16	64.2166	-1.37586	0.344097	-3.99847	6.37533e-05	0.00300558
WBGene00014883	Y39C12A.2	22.4444	-1.87098	0.46806	-3.9973	6.40678e-05	0.00300909
WBGene00019097	F59B1.2	4204.04	0.963027	0.241059	3.99499	6.46966e-05	0.00303099
WBGene00000690	col-116	80.1291	-1.56212	0.391307	-3.99205	6.55035e-05	0.0030611	COLlagen [Source:UniProtKB/TrEMBL;Acc:O61525]
WBGene00010109	F55C10.5	338.434	0.777886	0.195204	3.985	6.74813e-05	0.00312999
WBGene00019254	H31G24.3	213.253	-1.24512	0.312395	-3.98572	6.72761e-05	0.00312999
WBGene00077437	Y59H11AR.6	186.205	-1.53333	0.384747	-3.9853	6.73949e-05	0.00312999
WBGene00007589	erg-28	515.719	-1.12837	0.283207	-3.98425	6.76927e-05	0.003132	Probable ergosterol biosynthetic protein 28 homolog [Source:UniProtKB/Swiss-Prot;Acc:G5EEQ9]
WBGene00005597	srj-9	85.8185	-1.60184	0.40231	-3.98161	6.84495e-05	0.00315581	Serpentine Receptor, class J [Source:UniProtKB/TrEMBL;Acc:A0A131MD33]
WBGene00020910	dgtr-1	1035.5	-1.28935	0.323854	-3.98128	6.85457e-05	0.00315581	DGAT (Acyl-CoA:DiacylGlycerol AcylTransferase) Related [Source:UniProtKB/TrEMBL;Acc:Q23067]
WBGene00044253	M117.6	82.4087	-2.53552	0.637606	-3.97662	6.99023e-05	0.00321034
WBGene00004242	puf-6	1325.68	-1.72618	0.434172	-3.97579	7.01447e-05	0.00321356	Pumilio domain-containing protein 6 [Source:UniProtKB/Swiss-Prot;Acc:O01322]
WBGene00015621	C09B7.2	522.261	0.657376	0.165492	3.97225	7.11968e-05	0.00325376
WBGene00016664	C45E5.1	352.413	0.999705	0.252066	3.96604	7.30755e-05	0.00333146
WBGene00006802	unc-69	1373.05	-0.937374	0.236471	-3.96401	7.3702e-05	0.00335182	Short coiled-coil domain-containing protein UNC-69 splice variant T07A5.6b [Source:UniProtKB/TrEMBL;Acc:G5EDQ5]
WBGene00045092	H06I04.9	10.556	-3.50474	0.884624	-3.96184	7.43751e-05	0.0033742
WBGene00003721	nhr-131	482.779	0.701805	0.177336	3.95749	7.57425e-05	0.0034279	Nuclear Hormone Receptor family [Source:UniProtKB/TrEMBL;Acc:O16968]
WBGene00019302	K02D10.2	25.2155	-1.92002	0.485418	-3.95539	7.64091e-05	0.00344136
WBGene00194649	Y57G11C.1130	88.2685	-1.3482	0.340833	-3.95561	7.63389e-05	0.00344136
WBGene00006738	ulp-3	787.217	-1.95258	0.493764	-3.95448	7.67023e-05	0.00344625	Ubiquitin-Like Protease [Source:UniProtKB/TrEMBL;Acc:Q86FN3]
WBGene00006555	tbx-36	261.586	-2.26795	0.574588	-3.94708	7.91086e-05	0.00354582	Putative T-box protein 36 [Source:UniProtKB/Swiss-Prot;Acc:Q23622]
WBGene00001915	his-41	2393.63	0.694911	0.176171	3.94452	7.99592e-05	0.00357535	Probable histone H2B 3 [Source:UniProtKB/Swiss-Prot;Acc:Q27484]
WBGene00000613	col-36	1110.49	-6.61081	1.67821	-3.9392	8.17521e-05	0.00364558	Cuticle collagen 36 [Source:UniProtKB/Swiss-Prot;Acc:P34803]
WBGene00018199	F39E9.7	39.8841	-1.62391	0.412356	-3.93814	8.21164e-05	0.00364558
WBGene00021589	Y46D2A.1	22.835	-1.95652	0.496753	-3.93861	8.19553e-05	0.00364558
WBGene00008281	C53D6.4	1111.84	-0.709121	0.180197	-3.93526	8.31059e-05	0.00366882
WBGene00010424	H36L18.2	3386.54	-3.38919	0.861209	-3.93538	8.30638e-05	0.00366882
WBGene00013349	Y59A8B.12	1293.61	-1.39208	0.353778	-3.9349	8.32303e-05	0.00366882
WBGene00045272	F59C12.4	1989.08	-2.29648	0.585661	-3.92117	8.81199e-05	0.0038752
WBGene00012782	Y43C5A.2	4715.35	0.821929	0.209965	3.91461	9.05506e-05	0.00397272
WBGene00015849	C16C8.11	375.47	-1.46906	0.375393	-3.9134	9.10048e-05	0.00397731
WBGene00017507	F16B4.5	52.0362	-1.65415	0.422712	-3.9132	9.10819e-05	0.00397731
WBGene00006578	tli-1	927.465	0.900687	0.23036	3.90991	9.23321e-05	0.00400493	ToLlIp homolog [Source:UniProtKB/TrEMBL;Acc:Q93565]
WBGene00007626	rnf-121	2348.22	-0.813507	0.208015	-3.91081	9.19854e-05	0.00400493	RING finger protein 121 [Source:RefSeq peptide;Acc:NP_497832]
WBGene00012237	W04A8.2	129.708	-1.53641	0.39296	-3.90984	9.23586e-05	0.00400493
WBGene00002996	lin-7	595.541	-1.53739	0.393347	-3.90848	9.28793e-05	0.00401816
WBGene00019174	H09G03.1	28.7216	-2.47323	0.633042	-3.9069	9.34865e-05	0.00403507
WBGene00044614	C36B1.14	1029.93	-0.873407	0.223638	-3.90545	9.40503e-05	0.00405003
WBGene00194814	linc-34	28.0343	-2.34314	0.600269	-3.90348	9.48184e-05	0.0040737
WBGene00011561	ttr-15	23657.7	0.762779	0.195555	3.90059	9.59585e-05	0.00411096	Transthyretin-like protein 15 [Source:UniProtKB/Swiss-Prot;Acc:Q22288]
WBGene00017402	F12E12.1	541.183	-1.32788	0.340468	-3.90017	9.61268e-05	0.00411096
WBGene00008357	nspc-16	274.427	0.944514	0.242235	3.89916	9.6527e-05	0.00411863	Nematode Specific Peptide family, group C [Source:UniProtKB/TrEMBL;Acc:G5ECP8]
WBGene00045168	B0285.12	5.29706	-6.57043	1.68534	-3.89857	9.6761e-05	0.00411919
WBGene00011434	T04D3.5	1723.25	-0.814642	0.209005	-3.89772	9.71031e-05	0.00412434
WBGene00017131	E04F6.15	296.137	1.35905	0.348864	3.89564	9.79396e-05	0.00415041
WBGene00016564	cmt-1	2442.54	-1.13961	0.292637	-3.89428	9.84891e-05	0.00416424
WBGene00019477	K07C11.4	1026.54	1.07787	0.276825	3.89368	9.87363e-05	0.00416524	Carboxylic ester hydrolase [Source:UniProtKB/TrEMBL;Acc:Q21266]
WBGene00044762	ZK688.11	748.101	-0.82633	0.212286	-3.89253	9.9205e-05	0.00417557
WBGene00017243	F08C6.5	72.2956	-1.66932	0.429124	-3.89007	0.000100215	0.00419912
WBGene00017358	F10E9.7	944.116	-1.39465	0.358511	-3.89012	0.000100194	0.00419912
WBGene00044537	B0238.15	17.8963	-2.90887	0.748314	-3.88724	0.000101391	0.00423887
WBGene00013325	Y57G11C.36	848.816	-0.968277	0.249156	-3.88623	0.000101812	0.00424694
WBGene00004825	skr-19	1561.57	-1.74562	0.449602	-3.88259	0.000103351	0.00430154	SKR-19; SKp1 Related (Ubiquitin ligase complex component) [Source:UniProtKB/TrEMBL;Acc:G5EC92]
WBGene00009054	F22D6.9	404.934	-0.905354	0.233248	-3.8815	0.000103813	0.00431059	Serine/threonine-protein phosphatase [Source:UniProtKB/TrEMBL;Acc:Q27494]
WBGene00021503	ctsa-2	1037.77	0.910151	0.234515	3.88099	0.000104031	0.00431059	Carboxypeptidase [Source:UniProtKB/TrEMBL;Acc:O76725]
WBGene00022219	Y73B3A.18	420.411	-1.28894	0.332263	-3.87928	0.000104768	0.0043315
WBGene00008224	C50B8.1	2382.7	-1.21091	0.312217	-3.87842	0.000105136	0.00433708
WBGene00010353	memi-3	2631.89	-1.48332	0.382583	-3.87712	0.000105701	0.00435076	MEiosis-to-MItosis transition associated [Source:UniProtKB/TrEMBL;Acc:O45603]
WBGene00009432	cld-9	638.851	1.26513	0.326424	3.87573	0.000106305	0.00435639	Cub (CUB) Like Domain containing protein [Source:UniProtKB/TrEMBL;Acc:E0AHD6]
WBGene00011095	gana-1	958.674	0.958656	0.247327	3.87607	0.000106157	0.00435639	GAlactosidase/N-Acetylgalactosaminidase [Source:UniProtKB/TrEMBL;Acc:Q21801]
WBGene00020148	T01D1.3	479.409	0.971068	0.250881	3.87064	0.000108552	0.00443872
WBGene00022073	Y67D8C.9	350.84	0.611358	0.157995	3.86947	0.000109072	0.00444053	Aminopeptidase [Source:UniProtKB/TrEMBL;Acc:A8W765]
WBGene00022328	Y82E9BL.12	28.0962	-2.12932	0.550261	-3.86965	0.000108993	0.00444053
WBGene00044799	ZK686.6	22.3465	-1.70122	0.439851	-3.86771	0.000109861	0.00446291
WBGene00008745	F13E6.1	5771.51	0.701129	0.181361	3.86592	0.00011067	0.00448599
WBGene00011222	R10H10.3	2881.94	1.10524	0.285957	3.86506	0.000111061	0.00449206
WBGene00017640	F20D6.11	594.18	0.802327	0.207634	3.86413	0.000111484	0.00449941
WBGene00003053	lmp-1	11871.9	0.601189	0.155603	3.8636	0.000111729	0.00449958	LAMP family protein lmp-1 [Source:UniProtKB/Swiss-Prot;Acc:Q11117]
WBGene00007332	C05C10.5	6908.28	-1.20395	0.311711	-3.86238	0.000112288	0.00451144
WBGene00014947	Y71A12B.14	68.1864	-1.39083	0.360141	-3.8619	0.000112508	0.00451144
WBGene00003124	37012	466.663	-0.953999	0.247103	-3.86074	0.000113043	0.00452318	ATPase inhibitor mai-1, mitochondrial [Source:UniProtKB/Swiss-Prot;Acc:P37209]
WBGene00219707	linc-8	157.76	-1.80448	0.467691	-3.85827	0.000114194	0.00455943	NA
WBGene00022244	Y73B6BL.23	2327.47	-1.11816	0.290011	-3.85559	0.000115451	0.00459979
WBGene00013465	Y67H2A.10	1285.1	-1.46902	0.381736	-3.84827	0.000118956	0.00472934
WBGene00009556	F39B2.5	729.947	-1.19682	0.311292	-3.84469	0.000120706	0.00478868
WBGene00006237	str-204	27.2798	-1.69331	0.440782	-3.8416	0.000122235	0.00483906	Seven TM Receptor [Source:UniProtKB/TrEMBL;Acc:O16921]
WBGene00022393	abhd-12	3397.64	-0.868584	0.226239	-3.83923	0.000123423	0.00486541	ABHydrolase Domain containing homolog [Source:UniProtKB/TrEMBL;Acc:Q965S2]
WBGene00050927	B0250.12	77.2734	-1.70418	0.44386	-3.83946	0.000123307	0.00486541
WBGene00006810	unc-78	2045.59	0.591871	0.15422	3.83783	0.000124128	0.0048829	Actin-interacting protein 1 [Source:UniProtKB/Swiss-Prot;Acc:Q11176]
WBGene00008900	F16H6.10	805.276	1.09371	0.285419	3.83196	0.000127127	0.00499034
WBGene00013239	Y56A3A.22	2152.96	-0.955414	0.249737	-3.82568	0.000130413	0.00510856
WBGene00011335	T01E8.8	474.553	0.761772	0.19925	3.8232	0.00013173	0.00514933
WBGene00014975	Y116A8A.10	32.7017	-1.40924	0.368685	-3.82233	0.000132196	0.00515674
WBGene00007709	clec-87	29411.9	-1.3844	0.362439	-3.81966	0.000133634	0.00520197	C-type lectin domain-containing protein 87 [Source:UniProtKB/Swiss-Prot;Acc:Q9XVS3]
WBGene00002120	ins-37	106.088	-2.5878	0.678155	-3.81595	0.000135661	0.00525889	INSulin related [Source:UniProtKB/TrEMBL;Acc:Q9XVA1]
WBGene00012221	W03C9.5	1210.83	-1.97204	0.51674	-3.81631	0.000135463	0.00525889
WBGene00004622	rrn-3.1	103475	-2.68295	0.703227	-3.81519	0.000136077	0.00526409
WBGene00012002	T24H10.4	1512.91	-1.66581	0.436788	-3.81378	0.000136856	0.00527236
WBGene00185002	K11H3.8	324.434	-2.10489	0.551896	-3.81393	0.000136773	0.00527236
WBGene00219659	anr-36	30.7711	-1.61714	0.424155	-3.81261	0.000137508	0.00528654	NA
WBGene00007730	C25G4.2	1657.67	-1.65691	0.434832	-3.81046	0.000138711	0.00532181	Esterase C25G4.2 [Source:UniProtKB/Swiss-Prot;Acc:Q18169]
WBGene00018757	tag-304	1159.08	0.627077	0.164711	3.80714	0.000140583	0.00538257
WBGene00007856	C31H5.5	113.851	-1.38849	0.364777	-3.8064	0.000141004	0.00538763
WBGene00011558	T07A5.5	756.888	-2.06221	0.541964	-3.80506	0.000141767	0.00540572
WBGene00014069	ZK678.3	46.432	-2.43305	0.63963	-3.80384	0.000142467	0.00542132
WBGene00017216	F07F6.2	20.5015	-1.91313	0.503253	-3.80152	0.000143811	0.00546129
WBGene00000787	cps-6	1667.43	-1.13752	0.299278	-3.80089	0.000144179	0.00546414	Endonuclease G, mitochondrial [Source:UniProtKB/Swiss-Prot;Acc:Q95NM6]
WBGene00021560	coh-4	674.864	-0.823359	0.216672	-3.80003	0.000144681	0.00547204	COHesin family [Source:UniProtKB/TrEMBL;Acc:Q95XJ4]
WBGene00004984	spn-4	14466.8	-1.57394	0.414531	-3.79692	0.000146506	0.00551868	PIP-1 [Source:UniProtKB/TrEMBL;Acc:G5EF02]
WBGene00050948	Y48B6A.16	41.976	-1.74599	0.459827	-3.79707	0.000146417	0.00551868
WBGene00013295	Y57G11B.2	437.669	0.829405	0.218601	3.79414	0.000148155	0.00556954
WBGene00019203	ttr-47	2561.56	0.975058	0.257233	3.79057	0.000150303	0.00563893	TransThyretin-Related family domain [Source:UniProtKB/TrEMBL;Acc:O61977]
WBGene00018678	F52C12.1	1654.94	-1.09623	0.289382	-3.78817	0.000151762	0.00568225	Probable tyrosyl-DNA phosphodiesterase [Source:UniProtKB/Swiss-Prot;Acc:Q9TXV7]
WBGene00009049	F22B8.7	1644.59	0.735351	0.194169	3.78718	0.000152368	0.00568587
WBGene00235353	Y67D8C.23	41.1705	-1.95047	0.515041	-3.78701	0.000152469	0.00568587
WBGene00013551	Y75B8A.16	1843.48	-1.19768	0.316407	-3.78526	0.00015355	0.00571476
WBGene00000407	cdk-5	1440.9	-0.916329	0.242168	-3.78385	0.000154418	0.00573561	Cyclin-dependent-like kinase 5 [Source:UniProtKB/Swiss-Prot;Acc:G5ECH7]
WBGene00015899	C17E7.4	1427.42	-1.39904	0.369837	-3.78285	0.00015504	0.00574727
WBGene00014022	ZK637.2	2660.07	-1.58904	0.420619	-3.77786	0.000158179	0.00585178
WBGene00014516	hpo-42	954.027	-1.27208	0.336762	-3.77738	0.000158487	0.00585178
WBGene00017584	F19B10.2	551.11	-1.45263	0.385577	-3.76742	0.000164947	0.00607825
WBGene00015471	lmp-2	328.803	0.826344	0.219443	3.76565	0.000166117	0.00610931	LAMP (Lysosome-associated membrane protein) homolog [Source:UniProtKB/TrEMBL;Acc:Q9GYK0]
WBGene00000285	cal-1	255.375	1.03462	0.275039	3.76171	0.000168757	0.00618203	Calmodulin-like protein [Source:UniProtKB/Swiss-Prot;Acc:P04630]
WBGene00018670	F52C6.13	15.3713	-2.58621	0.687509	-3.76171	0.000168757	0.00618203
WBGene00010402	H16D19.4	15.2079	-2.12926	0.566236	-3.76037	0.00016966	0.00620292
WBGene00219618	linc-60	8.75455	-3.64261	0.969254	-3.75816	0.000171171	0.00624589	NA
WBGene00011397	T03E6.8	140.568	-1.28855	0.343237	-3.75412	0.00017395	0.0063349
WBGene00010747	K10D11.3	147.946	0.967089	0.257643	3.75361	0.000174308	0.00633556
WBGene00017660	F21C10.11	485.849	-1.92666	0.513349	-3.75312	0.00017465	0.00633565
WBGene00219303	Y13C8A.4	89.2547	-1.8014	0.480115	-3.75201	0.000175421	0.00635125
WBGene00016102	C25F6.1	519.757	-0.838717	0.223881	-3.74626	0.000179491	0.00648601
WBGene00004246	puf-10	486.859	-1.46431	0.391289	-3.74227	0.000182366	0.00656448
WBGene00206362	B0041.11	276.201	-1.37812	0.368212	-3.74272	0.000182039	0.00656448
WBGene00012560	Y37D8A.25	563.499	-1.35558	0.362442	-3.74013	0.000183924	0.00660781
WBGene00016758	C49A9.4	239.764	0.879049	0.235192	3.73758	0.000185798	0.00666229
WBGene00206505	B0250.18	11.5364	-2.44748	0.655578	-3.73332	0.00018897	0.00676302
WBGene00016104	ddr-1	270.994	1.01609	0.272299	3.73152	0.000190329	0.00679859	Discoidin domain-containing receptor A [Source:UniProtKB/Swiss-Prot;Acc:Q18163]
WBGene00219307	F56D6.17	123.579	-1.99644	0.535728	-3.72658	0.000194092	0.00691977
WBGene00194812	F19B2.12	122.589	-1.07877	0.289676	-3.72404	0.000196056	0.00697646
WBGene00013350	slr-2	765.742	-0.74377	0.199875	-3.72118	0.000198295	0.00704269	Synthetic with Lin-35/Rb [Source:RefSeq peptide;Acc:NP_001256774]
WBGene00010545	cbp-2	556.199	1.22351	0.329174	3.7169	0.000201683	0.0071494	CBP/p300 homolog [Source:UniProtKB/TrEMBL;Acc:G5EBG3]
WBGene00000612	col-35	106.911	-6.47406	1.74203	-3.7164	0.000202081	0.00714992	COLlagen [Source:UniProtKB/TrEMBL;Acc:Q93208]
WBGene00001073	dpy-11	9070.06	0.454231	0.122547	3.7066	0.000210064	0.00740427	DumPY: shorter than wild-type; Thioredoxin-like protein DPY-11 [Source:UniProtKB/TrEMBL;Acc:G5EC91]
WBGene00022452	Y110A2AR.1	6756.58	-1.35141	0.364553	-3.70702	0.000209709	0.00740427	Receptor expression-enhancing protein [Source:UniProtKB/TrEMBL;Acc:Q9N488]
WBGene00009165	gpx-1	670.169	1.00805	0.272076	3.70503	0.000211364	0.00743603	Glutathione peroxidase 1 [Source:UniProtKB/Swiss-Prot;Acc:O02621]
WBGene00015807	C16A3.2	566.055	-1.1194	0.30217	-3.70454	0.000211772	0.00743636
WBGene00012678	Y39B6A.16	295.789	-0.973793	0.262913	-3.70386	0.000212345	0.00744246
WBGene00017462	F14D2.14	91.0805	-0.930168	0.251391	-3.70008	0.000215533	0.00754001
WBGene00003902	pab-1	71402.1	-0.731413	0.197775	-3.6982	0.000217134	0.00756764	Polyadenylate-binding protein [Source:UniProtKB/TrEMBL;Acc:Q7K798]
WBGene00006438	nrfl-1	2764.16	0.915329	0.247505	3.69822	0.000217118	0.00756764	NHERF (Mammalian Na/H Exchange Regulatory Factor) Like [Source:UniProtKB/TrEMBL;Acc:I2HAI6]
WBGene00007707	fath-1	3558.44	-0.89436	0.241892	-3.69735	0.000217862	0.00757235	Fatty acid 2-hydroxylase [Source:UniProtKB/TrEMBL;Acc:Q9XVS0]
WBGene00012409	Y7A5A.3	9.15244	-2.6322	0.711966	-3.69709	0.000218082	0.00757235
WBGene00007374	C06C3.3	30.0942	-1.53212	0.414615	-3.69529	0.000219634	0.00759655
WBGene00008275	nstp-1	533.167	-0.795034	0.215119	-3.69578	0.00021921	0.00759655	Nucleotide Sugar TransPorter family [Source:UniProtKB/TrEMBL;Acc:X5M5W6]
WBGene00015794	C15F1.1	410.906	1.05907	0.286634	3.69487	0.000220001	0.00759655
WBGene00007453	fbxa-98	363.669	0.991268	0.268511	3.69173	0.000222735	0.00767676	F-box A protein [Source:UniProtKB/TrEMBL;Acc:Q9U3Q8]
WBGene00019579	oac-57	119.359	-1.8623	0.504657	-3.69022	0.00022406	0.00769398	O-ACyltransferase homolog [Source:UniProtKB/TrEMBL;Acc:C6ELT9]
WBGene00219675	linc-44	10.1617	-2.72266	0.737714	-3.69067	0.000223663	0.00769398	NA
WBGene00011275	psf-1	1783.15	-1.07368	0.291174	-3.68741	0.000226545	0.00776499	Probable DNA replication complex GINS protein PSF1 [Source:UniProtKB/Swiss-Prot;Acc:Q22019]
WBGene00018262	cyp-33C3	101.614	-1.1741	0.318464	-3.68677	0.000227119	0.0077704	CYtochrome P450 family [Source:UniProtKB/TrEMBL;Acc:O16670]
WBGene00000617	col-40	798.708	-5.71787	1.55118	-3.68614	0.00022768	0.00777532	Cuticle collagen 40 [Source:UniProtKB/Swiss-Prot;Acc:P34804]
WBGene00016080	C24H12.11	303.904	-1.88588	0.511782	-3.68492	0.000228775	0.00779844
WBGene00004677		705.205	-2.61741	0.710546	-3.68366	0.000229906	0.00782269
WBGene00018814	F54D11.4	1460.5	-1.2918	0.350786	-3.68258	0.000230889	0.00784183
WBGene00017411	F13A2.2	119.756	-1.81054	0.491779	-3.68161	0.000231764	0.00784297
WBGene00185117	C45B11.9	18.0684	-2.35443	0.63951	-3.68162	0.000231755	0.00784297
WBGene00021721	Y49F6B.9	1341.19	-1.30168	0.353643	-3.68078	0.000232523	0.00785438
WBGene00000614	col-37	346.642	-6.16865	1.67692	-3.67856	0.000234555	0.00790872	COLlagen [Source:UniProtKB/TrEMBL;Acc:G5ECU6]
WBGene00018697	F52E1.9	477.199	0.664397	0.180736	3.67606	0.000236866	0.00797219
WBGene00015933	C17H12.8	15330.5	0.90779	0.247249	3.67156	0.000241072	0.00809914
WBGene00022354	Y82E9BR.22	360.013	-1.55082	0.422773	-3.6682	0.000244262	0.00819156
WBGene00219218	Y73B6BL.288	59.1186	-1.69043	0.461023	-3.6667	0.000245701	0.00822505
WBGene00012695	Y39B6A.37	2358.1	-1.02547	0.280072	-3.66146	0.000250785	0.00838016
WBGene00016258	vha-16	10380.7	0.391402	0.106963	3.65921	0.000252992	0.0084388	Vacuolar H ATPase [Source:UniProtKB/TrEMBL;Acc:Q95YD5]
WBGene00008856	F15D3.6	2059.03	-0.800222	0.21881	-3.65716	0.000255024	0.00849138
WBGene00050903	Y17D7C.4	268.139	-1.91258	0.523098	-3.65626	0.000255923	0.00850612
WBGene00004409	rla-1	56924.2	-2.40622	0.65927	-3.64982	0.000262421	0.00867929	60S acidic ribosomal protein P1 [Source:UniProtKB/Swiss-Prot;Acc:P91913]
WBGene00015141	ugt-46	1235.15	0.817109	0.223911	3.64926	0.000262995	0.00867929	Putative UDP-glucuronosyltransferase ugt-46 [Source:UniProtKB/Swiss-Prot;Acc:Q10941]
WBGene00016575	C41H7.5	232.344	-1.17996	0.323284	-3.64992	0.000262323	0.00867929
WBGene00021971	Y57G7A.8	15.9312	-2.02684	0.555392	-3.64938	0.000262869	0.00867929
WBGene00020335	ttr-30	437.505	0.841478	0.230766	3.64646	0.000265878	0.00875893	TransThyretin-Related family domain [Source:UniProtKB/TrEMBL;Acc:Q22341]
WBGene00015028	B0207.5	22.5766	-1.93943	0.531999	-3.64556	0.000266812	0.00877422
WBGene00011182	R09H10.5	3943.96	0.765586	0.210076	3.64434	0.000268083	0.00880047
WBGene00015981	elt-7	419.324	0.704992	0.193609	3.64132	0.000271243	0.00888857	Transcription factor elt-7 [Source:UniProtKB/Swiss-Prot;Acc:O61924]
WBGene00219985	F58D5.13	169.735	-0.898125	0.246987	-3.63633	0.000276548	0.00904653	NA
WBGene00008859	F15D4.2	967.667	-1.40231	0.386217	-3.63088	0.000282459	0.0092222
WBGene00011694	T10G3.3	829.699	1.08014	0.297526	3.6304	0.000282987	0.0092222
WBGene00050946	M162.12	21.7594	-1.71542	0.472566	-3.63002	0.000283402	0.0092222
WBGene00016911	drn-1	177.137	1.22111	0.336816	3.62545	0.00028846	0.00937043	GTP-binding protein drn-1 [Source:UniProtKB/Swiss-Prot;Acc:Q09930]
WBGene00021485	Y40A1A.3	32.7148	-1.53901	0.425085	-3.62048	0.000294056	0.0095356
WBGene00014203	ZK1058.3	385.925	-0.977276	0.270179	-3.61714	0.000297871	0.00964255	Probable galactose-1-phosphate uridylyltransferase [Source:UniProtKB/Swiss-Prot;Acc:Q27536]
WBGene00013380	memi-2	1842.14	-1.22437	0.338572	-3.61628	0.00029887	0.00965812	MEiosis-to-MItosis transition associated [Source:UniProtKB/TrEMBL;Acc:Q9U1X3]
WBGene00000164	apm-3	1127.24	0.700496	0.193874	3.61316	0.000302489	0.0097413	AdaPtin, Mu/medium chain (Clathrin associated complex) [Source:UniProtKB/TrEMBL;Acc:Q20736]
WBGene00044348	Y71G12B.31	33.509	-1.73405	0.479926	-3.61317	0.000302478	0.0097413	Protein-tyrosine-phosphatase [Source:UniProtKB/TrEMBL;Acc:W6RR46]
WBGene00023469	C16A3.11	6.35214	-5.33727	1.47743	-3.61253	0.000303222	0.00974806
WBGene00001541	gcy-15	49.6442	-1.44943	0.401297	-3.61186	0.000304012	0.00975518	Receptor-type guanylate cyclase gcy-15 [Source:UniProtKB/Swiss-Prot;Acc:P91550]
WBGene00011028	R05D7.3	155.213	-0.868359	0.240446	-3.61145	0.00030449	0.00975518
WBGene00194794	F45B8.5	58.9055	-1.48155	0.41054	-3.60879	0.000307625	0.00983872
WBGene00008560	pho-13	242.549	1.27522	0.353421	3.60821	0.000308318	0.00984401	Intestinal acid PHOsphatase [Source:UniProtKB/TrEMBL;Acc:Q19175]
WBGene00021961	Y57E12B.1	8.73999	-6.51354	1.80801	-3.60261	0.00031504	0.0100265
WBGene00219756	linc-68	9.53862	-3.22915	0.896352	-3.60255	0.000315111	0.0100265	NA
WBGene00003012	lin-26	2055.3	-1.1434	0.317439	-3.60194	0.000315855	0.0100331	Transcription factor lin-26 [Source:UniProtKB/Swiss-Prot;Acc:Q27355]
WBGene00006432	tag-53	2800.91	0.563382	0.156459	3.60082	0.00031721	0.010059	Putative protein tag-53 [Source:UniProtKB/Swiss-Prot;Acc:Q19981]
WBGene00002119	ins-36	12.3088	-2.67839	0.744113	-3.59944	0.000318904	0.0100956	INSulin related [Source:UniProtKB/TrEMBL;Acc:G2HK14]
WBGene00003603	nhr-4	501.697	0.675984	0.187856	3.59842	0.000320157	0.010118	Nuclear hormone receptor family member nhr-4 [Source:UniProtKB/Swiss-Prot;Acc:O45436]
WBGene00013516	Y73F4A.3	316.608	0.998891	0.277666	3.59746	0.000321343	0.0101383
WBGene00013604	Y87G2A.18	801.459	-1.17359	0.32629	-3.59677	0.000322196	0.0101481
WBGene00001671	gpa-9	45.886	-1.76808	0.491825	-3.59493	0.000324474	0.0102013	Guanine nucleotide-binding protein alpha-9 subunit [Source:RefSeq peptide;Acc:NP_001256444]
WBGene00012568	fbxa-212	110.044	-1.20676	0.33572	-3.59453	0.000324979	0.0102013
WBGene00018483	F45F2.11	2704.03	-1.51156	0.420581	-3.59397	0.000325672	0.0102059
WBGene00194716	ZK637.18	7.82453	-4.29196	1.19478	-3.59228	0.000327799	0.0102553
WBGene00004064	pms-2	823.267	-1.38711	0.386378	-3.59002	0.000330649	0.0103271	PMS (Post Meiotic Segregation) family [Source:UniProtKB/TrEMBL;Acc:G5EFG5]
WBGene00045404	C06C3.11	46.5346	1.11117	0.309568	3.58941	0.000331426	0.0103341
WBGene00013153	Y53F4B.6	19.6804	-1.76233	0.491064	-3.5888	0.000332208	0.0103412
WBGene00219720	linc-2	14.2457	-2.63922	0.735558	-3.58805	0.00033316	0.0103535	NA
WBGene00009673	F43G9.13	650.452	-0.904732	0.252204	-3.5873	0.000334124	0.0103662
WBGene00021034	enu-3.4	41.7549	-1.47517	0.411336	-3.5863	0.000335398	0.0103884	ENhancer of Uncoordination [Source:UniProtKB/TrEMBL;Acc:Q9TYT9]
WBGene00015851	C16C8.13	68.0436	-1.98538	0.553877	-3.58451	0.000337712	0.0104428
WBGene00015010	ptps-1	639.762	1.02013	0.28486	3.58118	0.000342044	0.0105592	Putative 6-pyruvoyl tetrahydrobiopterin synthase [Source:UniProtKB/Swiss-Prot;Acc:O02058]
WBGene00007955	selt-1.1	3399.56	0.663883	0.185502	3.57885	0.000345107	0.0105816	Putative selT-like protein C35C5.3 [Source:UniProtKB/Swiss-Prot;Acc:Q9U3N5]
WBGene00009186	trcs-1	8951.41	-1.67295	0.467513	-3.5784	0.0003457	0.0105816	TRansport of membrane to Cell Surface [Source:UniProtKB/TrEMBL;Acc:Q19839]
WBGene00009393	clec-62	4931.28	0.837626	0.234102	3.57804	0.000346174	0.0105816	C-type LECtin [Source:UniProtKB/TrEMBL;Acc:O45441]
WBGene00012566	fbxa-211	144.263	-1.09477	0.305934	-3.57844	0.000345653	0.0105816	F-box A protein [Source:UniProtKB/TrEMBL;Acc:Q9U2N5]
WBGene00012588	lips-16	92.9283	-1.46904	0.410473	-3.57891	0.000345035	0.0105816
WBGene00044742	Y55F3BR.10	67.6246	-2.11991	0.592138	-3.58009	0.000343475	0.0105816
WBGene00000621	col-44	60.2721	-3.77009	1.05403	-3.57684	0.00034777	0.010613	COLlagen [Source:UniProtKB/TrEMBL;Acc:Q20739]
WBGene00006938	wee-1.1	19.5461	-2.14773	0.60054	-3.57633	0.000348448	0.0106163	Membrane-associated tyrosine- and threonine-specific cdc2-inhibitory kinase wee-1.1 [Source:UniProtKB/Swiss-Prot;Acc:Q20085]
WBGene00018669	F52C6.12	83.6009	-1.3972	0.390747	-3.57571	0.000349283	0.0106243
WBGene00008747	phf-31	132.048	-1.0415	0.291393	-3.57421	0.000351281	0.0106677	PHd Finger family [Source:UniProtKB/TrEMBL;Acc:A0A131MDG3]
WBGene00011527	cchl-1	4648.01	-0.733014	0.205166	-3.57278	0.000353206	0.0107088	Probable cytochrome c-type heme lyase [Source:UniProtKB/Swiss-Prot;Acc:P53703]
WBGene00014907	fbxa-117	18.4956	-1.69406	0.474507	-3.57015	0.000356775	0.0107994
WBGene00003827	ntl-4	2520.56	-0.661252	0.18541	-3.56643	0.000361876	0.0109184	NOT-Like (Yeast CCR4/NOT complex component) [Source:UniProtKB/TrEMBL;Acc:W6RTE4]
WBGene00011463	T05A10.6	55.6037	1.51073	0.423561	3.56673	0.000361462	0.0109184
WBGene00235385	Y48G1A.7	81.4573	-1.23808	0.347281	-3.56506	0.000363778	0.010958
WBGene00021561	Y45G5AM.9	2065.47	-1.01721	0.285497	-3.56294	0.000366726	0.011029
WBGene00013778	clec-194	16.8502	2.24735	0.630993	3.56161	0.000368593	0.0110673	C-type LECtin [Source:UniProtKB/TrEMBL;Acc:Q9U2W5]
WBGene00004995	spp-10	11054.9	0.640369	0.179841	3.56074	0.000369806	0.0110859	SaPosin-like Protein family [Source:UniProtKB/TrEMBL;Acc:Q18276]
WBGene00009878	F49C12.9	3423.21	-0.794383	0.224095	-3.54485	0.000392844	0.0117576
WBGene00023245	C33E10.3	42.63	-1.53606	0.433562	-3.54289	0.000395771	0.0118262
WBGene00010652	K08C9.5	12.6763	-2.46875	0.697297	-3.54045	0.000399439	0.0119167
WBGene00012879	fbxa-215	3276.74	-2.11297	0.596903	-3.5399	0.000400281	0.0119228	F-box A protein [Source:UniProtKB/TrEMBL;Acc:O62474]
WBGene00008178	C48D1.5	56.5678	-1.13734	0.321482	-3.53779	0.000403496	0.0119993
WBGene00020189	tfbm-1	806.558	-0.751855	0.212615	-3.53623	0.000405882	0.0120511	Dimethyladenosine transferase 1, mitochondrial [Source:UniProtKB/Swiss-Prot;Acc:P91424]
WBGene00000799	crn-6	956.572	0.907472	0.256655	3.53576	0.000406598	0.0120531	Cell death-related nuclease 6 [Source:UniProtKB/Swiss-Prot;Acc:P34508]
WBGene00010807	M01E5.4	2252.7	-0.856685	0.242573	-3.53166	0.000412957	0.0122222
WBGene00017785	F25E5.4	158.05	-1.32675	0.375759	-3.53085	0.000414226	0.0122403
WBGene00020321	T07F12.1	244.672	0.792754	0.224622	3.52929	0.000416684	0.0122741
WBGene00044188	F28F8.9	773.998	-1.06944	0.303018	-3.5293	0.000416667	0.0122741
WBGene00020382	T09B4.8	2038.73	0.645815	0.183021	3.52863	0.000417712	0.0122849
WBGene00011505	pzf-1	600.289	-1.17917	0.334332	-3.52695	0.000420379	0.0123245	Paired Zinc Finger protein [Source:UniProtKB/TrEMBL;Acc:G5EGQ2]
WBGene00219688	linc-21	17.4972	-2.5615	0.726218	-3.52718	0.000420011	0.0123245	NA
WBGene00019651	K11D12.12	261.661	-0.89384	0.253496	-3.52605	0.000421812	0.0123471
WBGene00219687	linc-12	8.48503	-2.71205	0.769541	-3.52425	0.000424683	0.0124117	NA
WBGene00011660	T09E11.11	67.5156	-1.59634	0.453139	-3.52284	0.000426946	0.0124583
WBGene00009140	F26A3.1	1278.46	-0.59363	0.168602	-3.5209	0.000430087	0.0125303
WBGene00003083	lst-1	2959.49	-0.8722	0.247864	-3.51887	0.000433384	0.012587	Lateral Signaling Target [Source:UniProtKB/TrEMBL;Acc:P91820]
WBGene00219751	anr-24	5.31569	-4.79115	1.36154	-3.51892	0.000433304	0.012587	NA
WBGene00007906	C33G3.6	248.176	-0.949874	0.269976	-3.51837	0.000434207	0.0125913
WBGene00002254	lbp-2	14295.6	0.907778	0.258078	3.51746	0.000435693	0.0126148	Fatty acid-binding protein homolog 2 [Source:UniProtKB/Swiss-Prot;Acc:Q20224]
WBGene00022339	Y82E9BR.6	13.4252	-2.75277	0.782881	-3.5162	0.000437766	0.0126449
WBGene00194742	F37C12.21	58.5907	-1.66988	0.474936	-3.51601	0.00043809	0.0126449
WBGene00000444	ceh-21	757.397	-0.926402	0.263748	-3.51246	0.000443987	0.0127743	Homeobox protein ceh-21 [Source:UniProtKB/Swiss-Prot;Acc:Q22811]
WBGene00001392	far-8	2786.56	0.788922	0.224598	3.51259	0.000443757	0.0127743	Fatty Acid/Retinol binding protein [Source:UniProtKB/TrEMBL;Acc:Q21152]
WBGene00077636	Y46G5A.43	218.123	-1.16264	0.33104	-3.51207	0.000444628	0.0127743
WBGene00011824	T18D3.7	347.707	0.879608	0.25052	3.51113	0.000446202	0.0127998
WBGene00017180	F02E11.2	152.715	-1.41187	0.402404	-3.50859	0.000450482	0.0129028
WBGene00012953	fbxa-216	93.6524	-1.45928	0.415973	-3.5081	0.000451312	0.0129067	F-box A protein [Source:UniProtKB/TrEMBL;Acc:Q9XWD4]
WBGene00015818	C16A11.5	391.201	-1.39507	0.397732	-3.50756	0.000452234	0.0129132
WBGene00007056	crn-7	276.526	0.72736	0.207458	3.50606	0.000454798	0.0129666	Cell-death-related nuclease 7 [Source:UniProtKB/Swiss-Prot;Acc:P34387]
WBGene00015245	B0524.6	429.608	-1.77148	0.505467	-3.50464	0.00045722	0.0130158
WBGene00010036	cpar-1	1764.6	-1.37387	0.392155	-3.5034	0.000459368	0.0130371	Histone H3-like centromeric protein cpar-1 [Source:UniProtKB/Swiss-Prot;Acc:P34440]
WBGene00020516	T15B7.1	1852.27	0.971673	0.277346	3.50347	0.000459237	0.0130371
WBGene00020258	T05E7.1	515.896	1.05006	0.300017	3.49999	0.000465267	0.0131845
WBGene00219680	linc-35	33.2415	-1.52613	0.436106	-3.49945	0.000466224	0.0131915	NA
WBGene00002982	lgg-3	1480.73	-1.03936	0.297135	-3.49795	0.00046885	0.0132057	Ubiquitin-like protein ATG12 [Source:UniProtKB/TrEMBL;Acc:Q10931]
WBGene00013921	best-22	461.977	0.701577	0.20054	3.49844	0.000467992	0.0132057	Bestrophin homolog 22 [Source:UniProtKB/Swiss-Prot;Acc:Q23369]
WBGene00206420	T26G10.7	109.455	-1.56687	0.447899	-3.49826	0.000468305	0.0132057
WBGene00000511	ckb-1	229.584	0.830415	0.237433	3.49748	0.000469682	0.0132092	Choline kinase B1 [Source:UniProtKB/Swiss-Prot;Acc:P46558]
WBGene00021153	Y4C6A.3	680.82	-1.68577	0.482181	-3.49613	0.000472064	0.0132562
WBGene00023485	ttr-49	382.088	1.15444	0.33025	3.49564	0.000472923	0.0132603	TransThyretin-Related family domain [Source:UniProtKB/TrEMBL;Acc:Q65ZI4]
WBGene00050920	Y54H5A.5	24.0276	-2.05168	0.587032	-3.495	0.000474061	0.0132723
WBGene00195025	F39E9.18	5.4286	-3.43643	0.983556	-3.49389	0.000476042	0.0133078
WBGene00003699	nhr-109	195.196	0.765669	0.219233	3.49249	0.000478531	0.0133524	Nuclear Hormone Receptor family [Source:UniProtKB/TrEMBL;Acc:H2L0L6]
WBGene00014562	Y17D7B.7	171.113	-4.18914	1.19957	-3.49219	0.000479071	0.0133524
WBGene00021781	Y51H7C.3	1212.35	-1.11517	0.319487	-3.49051	0.000482099	0.0134167
WBGene00001239	elo-1	6982.32	-0.615977	0.176738	-3.48526	0.000491667	0.0136626	Elongation of very long chain fatty acids protein [Source:UniProtKB/TrEMBL;Acc:G5EEE5]
WBGene00015344	nra-4	6016.86	0.844613	0.242456	3.48358	0.000494762	0.0137282	Nicotinic Receptor Associated [Source:UniProtKB/TrEMBL;Acc:Q9UAN9]
WBGene00015392	nspc-7	140.546	0.991329	0.284742	3.4815	0.000498614	0.0138145	Nematode Specific Peptide family, group C [Source:UniProtKB/TrEMBL;Acc:Q8WQG6]
WBGene00003710	nhr-120	338.307	0.654846	0.188247	3.47865	0.000503951	0.0139251	Nuclear Hormone Receptor family; Nuclear receptor NHR-120 [Source:UniProtKB/TrEMBL;Acc:G5EET0]
WBGene00007019	mdt-19	2666.42	-1.06007	0.304743	-3.47857	0.000504098	0.0139251	Mediator of RNA polymerase II transcription subunit 19 [Source:UniProtKB/Swiss-Prot;Acc:Q9N4F2]
WBGene00006430	tag-51	552.669	-0.530982	0.15269	-3.47751	0.000506094	0.0139595
WBGene00010018	fbxa-69	168.021	-0.975043	0.280584	-3.47505	0.000510752	0.0140672	F-box A protein [Source:UniProtKB/TrEMBL;Acc:O45561]
WBGene00021605	Y46H3C.5	197.564	-2.15756	0.621104	-3.47374	0.000513251	0.0141151
WBGene00010667	K08E4.3	816.858	-0.947683	0.27317	-3.4692	0.000522006	0.0143348
WBGene00020589	T19H12.3	306.659	0.930201	0.268173	3.46866	0.000523056	0.0143425
WBGene00004184	T19D2.2	1631.46	0.903865	0.260658	3.46763	0.000525078	0.0143768	Putative prenylated protein tyrosine phosphatase [Source:UniProtKB/TrEMBL;Acc:G5EG43]
WBGene00219708	linc-13	30.3602	-2.96584	0.856019	-3.4647	0.000530832	0.014513	NA
WBGene00001595	gld-1	13677.1	-1.2247	0.353623	-3.46329	0.000533607	0.0145468	Female germline-specific tumor suppressor gld-1 [Source:UniProtKB/Swiss-Prot;Acc:Q17339]
WBGene00003912	pal-1	2800.47	-1.54522	0.446175	-3.46325	0.000533692	0.0145468	Homeobox protein pal-1 [Source:UniProtKB/Swiss-Prot;Acc:P34766]
WBGene00022214	cal-6	8.24112	-3.12589	0.902683	-3.46289	0.000534407	0.0145468
WBGene00018846	eef-1B.1	34024.4	-1.73232	0.500795	-3.45914	0.000541893	0.0147291	Probable elongation factor 1-beta/1-delta 1 [Source:UniProtKB/Swiss-Prot;Acc:P34460]
WBGene00000168	apx-1	3401.36	-1.24496	0.360483	-3.45359	0.000553174	0.0149707	Anterior pharynx in excess protein 1 [Source:UniProtKB/Swiss-Prot;Acc:P41990]
WBGene00001979	hmp-2	4055	-0.688223	0.199271	-3.45371	0.000552932	0.0149707	Beta-catenin-like protein hmp-2 [Source:UniProtKB/Swiss-Prot;Acc:O44326]
WBGene00008200	C49C3.10	223.074	0.766767	0.222096	3.45241	0.000555601	0.0149707
WBGene00009511	F37H8.2	100.549	-1.63914	0.474756	-3.45259	0.000555225	0.0149707
WBGene00014904	Y49E10.26	140.264	-2.1639	0.626749	-3.45258	0.000555247	0.0149707
WBGene00015517	C06A8.8	320.538	0.751849	0.21776	3.45265	0.000555108	0.0149707
WBGene00008358	nspc-18	639.785	1.09501	0.317268	3.45137	0.000557738	0.0150066	Nematode Specific Peptide family, group C [Source:UniProtKB/TrEMBL;Acc:Q8MQ91]
WBGene00010227	F58A4.2	1302.88	-1.08429	0.314235	-3.45058	0.000559375	0.015029
WBGene00014915	Y53C10A.1	476.769	-1.28079	0.371256	-3.44989	0.000560807	0.0150458
WBGene00220007	K06A4.15	4.35121	-4.92092	1.42704	-3.44834	0.000564039	0.0151107	NA
WBGene00010309	rpn-6.2	461.302	-0.981255	0.284843	-3.4449	0.000571274	0.0152761	Probable 26S proteasome regulatory subunit rpn-6.2 [Source:UniProtKB/Swiss-Prot;Acc:P34481]
WBGene00014978	ZC47.8	49.4773	-1.31243	0.381007	-3.44463	0.000571849	0.0152761
WBGene00003354	mir-260	6.85924	-3.35201	0.973476	-3.44334	0.000574579	0.0153202
WBGene00189978	B0250.14	7.03583	-2.86822	0.83304	-3.44307	0.000575144	0.0153202
WBGene00012148	inos-1	5489.95	-1.33383	0.387483	-3.4423	0.000576787	0.015342	INOsitol-3-phosphate Synthase [Source:UniProtKB/TrEMBL;Acc:G5ED01]
WBGene00013870	ZC373.5	517.609	0.685056	0.199098	3.44079	0.000580022	0.0153624	Probable methylthioribulose-1-phosphate dehydratase [Source:UniProtKB/Swiss-Prot;Acc:Q23261]
WBGene00019411	K05F1.10	237.688	0.952926	0.2769	3.4414	0.000578703	0.0153624
WBGene00021532	Y42G9A.2	307.939	1.03399	0.300483	3.4411	0.000579359	0.0153624
WBGene00195226	ZC404.16	4.89896	-3.44865	1.00278	-3.43909	0.00058368	0.0154373
WBGene00011986	T24D1.3	4477.13	-1.48565	0.43215	-3.43782	0.000586408	0.0154875
WBGene00002062	ife-4	754.445	0.638949	0.185966	3.43583	0.000590744	0.0155799	Eukaryotic translation initiation factor 4E-4 [Source:UniProtKB/Swiss-Prot;Acc:Q22888]
WBGene00004925	snt-5	389.494	0.856942	0.249504	3.43458	0.000593472	0.0156169	SyNapTotagmin [Source:UniProtKB/TrEMBL;Acc:O16700]
WBGene00019132	bath-19	207.53	-1.27969	0.372608	-3.43442	0.00059382	0.0156169	BTB and MATH domain containing [Source:UniProtKB/TrEMBL;Acc:Q9N5P6]
WBGene00006466	tag-115	961.062	-0.953544	0.277796	-3.43253	0.000597986	0.0156822
WBGene00008976	plp-2	17.1975	-1.99564	0.581359	-3.43271	0.000597571	0.0156822	Pur alpha Like Protein [Source:UniProtKB/TrEMBL;Acc:Q93537]
WBGene00001938	his-64	25.0857	-2.26128	0.659311	-3.42976	0.000604108	0.0157762	Histone H4 [Source:UniProtKB/Swiss-Prot;Acc:P62784]
WBGene00010238	F58B4.5	348.958	1.1462	0.334172	3.42997	0.000603646	0.0157762
WBGene00011607	T08D2.2	60.388	-1.55587	0.453595	-3.43008	0.0006034	0.0157762
WBGene00001607	gln-6	17260.1	-1.3863	0.405149	-3.42169	0.000622322	0.0162291	GLutamiNe synthetase (Glutamate-ammonia ligase) [Source:UniProtKB/TrEMBL;Acc:O02225]
WBGene00010100	F55C9.3	16.7027	-1.67395	0.489326	-3.42092	0.000624099	0.0162359
WBGene00077441	C43D7.10	66.2985	-1.32951	0.388652	-3.42082	0.000624325	0.0162359
WBGene00001933	his-59	146.842	-1.78777	0.522742	-3.41999	0.000626231	0.0162628	Histone H3 [Source:UniProtKB/Swiss-Prot;Acc:P08898]
WBGene00008987	F20G2.3	631.501	1.06746	0.312321	3.41783	0.000631234	0.0163699
WBGene00016445	C35D10.8	128.2	-1.3358	0.390886	-3.41737	0.000632297	0.0163747
WBGene00011731	acbp-5	1820.52	-0.873578	0.255672	-3.41678	0.000633653	0.0163871	Acyl-Coenzyme A Binding Protein [Source:UniProtKB/TrEMBL;Acc:Q9XVJ0]
WBGene00013779	Y116A8B.1	10.0558	-2.70414	0.791704	-3.41559	0.000636438	0.0164363
WBGene00018118	F36H12.2	222.089	-0.600179	0.175739	-3.41518	0.000637401	0.0164384
WBGene00001936	his-62	125.406	-1.60853	0.471078	-3.41457	0.000638824	0.0164524	Probable histone H2B 4 [Source:UniProtKB/Swiss-Prot;Acc:Q27876]
WBGene00006978	zig-1	651.927	0.980629	0.287304	3.41322	0.000642011	0.0165116	Zwei Ig domain protein zig-1 [Source:UniProtKB/Swiss-Prot;Acc:G5EGI7]
WBGene00001250	elt-2	981.628	0.68446	0.200578	3.41244	0.000643846	0.016536	Transcription factor elt-2 [Source:UniProtKB/Swiss-Prot;Acc:Q10655]
WBGene00001729	grl-20	323.141	-5.04553	1.47894	-3.41158	0.000645869	0.0165652	GRound-Like (Grd related) [Source:UniProtKB/TrEMBL;Acc:O61832]
WBGene00235387	W04C9.8	17.1244	-2.00995	0.589337	-3.41052	0.00064838	0.0166067
WBGene00007200	vamp-8	217.982	0.821186	0.240856	3.40945	0.000650931	0.0166227	VAMP (Vesicle Associated Membrane Protein) homolog [Source:UniProtKB/TrEMBL;Acc:Q95QZ1]
WBGene00007875	dod-24	4774.55	1.01115	0.2966	3.40914	0.000651679	0.0166227	Downstream Of DAF-16 (Regulated by DAF-16) [Source:UniProtKB/TrEMBL;Acc:Q9XUH3]
WBGene00017849	F27B3.7	60.1597	-1.10398	0.323762	-3.40986	0.000649973	0.0166227
WBGene00004884	smg-6	4608.92	-0.797917	0.234119	-3.40817	0.000654006	0.0166593	Suppressor with Morphological effect on Genitalia [Source:UniProtKB/TrEMBL;Acc:Q9BL69]
WBGene00014979	ZC47.11	13.9618	-2.1625	0.634685	-3.4072	0.000656341	0.0166959
WBGene00000775	cpin-1	352.832	0.826091	0.242515	3.40636	0.00065836	0.0167064	CyPIN (Guanine aminohydrolase) homolog [Source:UniProtKB/TrEMBL;Acc:Q20166]
WBGene00016867	C52B9.4	6031.73	0.690366	0.202674	3.40628	0.000658542	0.0167064
WBGene00017257	F08F1.3	217.719	0.622734	0.182861	3.40549	0.000660444	0.0167118
WBGene00219422	Y52B11A.20	35.2306	-1.22658	0.36018	-3.40545	0.000660548	0.0167118
WBGene00003615	nhr-16	84.1182	1.06027	0.311563	3.40307	0.000666324	0.0167497	Nuclear hormone receptor family member nhr-16 [Source:UniProtKB/Swiss-Prot;Acc:Q27521]
WBGene00016216	pals-22	286.039	0.732466	0.215206	3.40356	0.000665148	0.0167497	Protein containing ALS2cr12 (ALS2CR12) domain [Source:UniProtKB/TrEMBL;Acc:Q9TZB2]
WBGene00021374	Y37E11B.1	155.755	-1.21771	0.357837	-3.40299	0.000666538	0.0167497
WBGene00021750	Y50D4C.6	551.113	-0.822768	0.241778	-3.40299	0.000666524	0.0167497
WBGene00044216	C47E8.10	16.7244	-3.39759	0.998174	-3.40381	0.000664531	0.0167497
WBGene00012981	Y48B6A.10	77.8676	-1.16585	0.342702	-3.40195	0.000669064	0.0167905
WBGene00013221	Y54G11A.14	166.983	-1.57045	0.461798	-3.40073	0.000672056	0.0168429
WBGene00001851	hif-1	5398.61	0.622001	0.182999	3.39893	0.000676505	0.016909	Hypoxia-inducible factor 1 [Source:UniProtKB/Swiss-Prot;Acc:G5EGD2]
WBGene00012439	Y12A6A.1	664.666	0.888686	0.261455	3.39901	0.000676314	0.016909
WBGene00018853	sec-22	1150.65	0.724592	0.213393	3.39557	0.000684852	0.0170947	Yeast SEC homolog [Source:UniProtKB/TrEMBL;Acc:Q94241]
WBGene00022043	psf-3	1888.95	-1.26737	0.373398	-3.39415	0.000688423	0.0171609	PSF (Yeast Partner of Sld Five) conserved replication factor, GINS complex [Source:UniProtKB/TrEMBL;Acc:Q9BL54]
WBGene00012151	VH15N14R.1	122.074	-1.67493	0.493615	-3.39318	0.00069086	0.0171862
WBGene00012167	tofu-5	1846.21	-1.06416	0.313633	-3.39301	0.000691281	0.0171862	Twenty One u-rna (21U-RNA) biogenesis Fouled Up [Source:UniProtKB/TrEMBL;Acc:Q23096]
WBGene00044224	F17C8.8	17.0705	-2.25128	0.663831	-3.39134	0.000695505	0.0172682
WBGene00000627	col-50	221.137	-5.23971	1.54532	-3.39069	0.00069717	0.0172865	COLlagen [Source:UniProtKB/TrEMBL;Acc:O01662]
WBGene00012184	mnr-1	884.13	0.79872	0.235642	3.38955	0.000700076	0.0173355	MeNoRin (Dendritic branching protein) [Source:UniProtKB/TrEMBL;Acc:O45879]
WBGene00007601	C15C6.2	215.862	-3.28476	0.969299	-3.3888	0.000701984	0.0173597
WBGene00010649	K08C7.7	167.806	0.688871	0.203302	3.38842	0.000702973	0.0173611
WBGene00022317	Y81B9A.3	3.71025	-4.96569	1.46578	-3.38774	0.000704717	0.0173811
WBGene00010781	K11H3.4	475.713	-1.37412	0.405662	-3.38735	0.000705705	0.0173825
WBGene00012374	W09H1.4	34.0583	-1.89914	0.560857	-3.38614	0.000708825	0.0174364
WBGene00006603	tps-2	2102.02	0.598368	0.176763	3.38514	0.000711432	0.0174774	Alpha,alpha-trehalose-phosphate synthase [UDP-forming] 2 [Source:UniProtKB/Swiss-Prot;Acc:O45380]
WBGene00001934	his-60	289.517	-1.53032	0.45225	-3.38378	0.000714944	0.0175031	Histone H4 [Source:UniProtKB/Swiss-Prot;Acc:P62784]
WBGene00008447	E01G4.5	159.919	-1.14296	0.337752	-3.38402	0.000714324	0.0175031
WBGene00021715	Y49F6B.2	1804.54	0.66644	0.196959	3.38365	0.000715292	0.0175031
WBGene00004086	pph-4.2	3384.62	-1.34212	0.396792	-3.38242	0.000718505	0.0175095	Serine/threonine-protein phosphatase 4 catalytic subunit 2 [Source:UniProtKB/Swiss-Prot;Acc:Q9XTT8]
WBGene00017262	F08F3.4	834.471	0.955642	0.282588	3.38175	0.00072025	0.0175095
WBGene00017400	stg-2	94.794	-0.893577	0.264158	-3.38274	0.000717675	0.0175095	STarGazin (Mammalian calcium channel) homolog; TARP-like protein STG-2 [Source:UniProtKB/TrEMBL;Acc:G5EBI8]
WBGene00017460	bath-30	1003.15	-1.37804	0.407336	-3.38305	0.000716844	0.0175095	BTB and MATH domain containing [Source:UniProtKB/TrEMBL;Acc:Q8MXH8]
WBGene00018694	F52E1.5	87.1336	1.21995	0.360733	3.38186	0.00071996	0.0175095
WBGene00011203	R10E4.7	103.184	-1.33708	0.39555	-3.38031	0.000724035	0.0175786
WBGene00021732	Y49G5B.1	1904.86	-1.06262	0.314513	-3.37862	0.000728511	0.017649
WBGene00219746	linc-91	27.8738	-1.34575	0.398329	-3.3785	0.000728828	0.017649	NA
WBGene00015885	fbxa-65	372.704	0.713039	0.211077	3.37809	0.000729911	0.0176523	F-box A protein [Source:UniProtKB/TrEMBL;Acc:O45159]
WBGene00010263	wago-4	2995.44	-0.937377	0.277517	-3.37772	0.000730889	0.017653	Piwi-like protein [Source:UniProtKB/TrEMBL;Acc:O62275]
WBGene00009310	F32A11.5	20.7425	-2.26559	0.67083	-3.3773	0.000732007	0.0176572
WBGene00044233	Y56A3A.36	523.233	-1.08301	0.320789	-3.37609	0.000735238	0.0177122
WBGene00003624	nhr-28	587.801	0.603622	0.178878	3.37448	0.000739544	0.017793	Nuclear hormone receptor family member nhr-28 [Source:UniProtKB/Swiss-Prot;Acc:Q17905]
WBGene00020556	pamn-1	905.674	0.514942	0.152628	3.37383	0.0007413	0.0178122	Probable peptidyl-glycine alpha-amidating monooxygenase pamn-1 Probable peptidylglycine alpha-hydroxylating monooxygenase Probable peptidyl-alpha-hydroxyglycine alpha-amidating lyase [Source:UniProtKB/Swiss-Prot;Acc:P83388]
WBGene00003019	lin-33	1144.65	0.734868	0.217908	3.37239	0.0007452	0.0178647
WBGene00017082	DC2.5	295.343	0.685402	0.203244	3.37231	0.0007454	0.0178647
WBGene00006949	wrt-3	223.359	0.860527	0.255317	3.37042	0.000750525	0.0179414	Warthog protein 3 [Source:UniProtKB/Swiss-Prot;Acc:Q20170]
WBGene00012096	T27E9.6	24.3791	-1.59511	0.473242	-3.37061	0.000750025	0.0179414
WBGene00014615	Y116F11A.4	20.2632	-1.62972	0.484024	-3.36703	0.000759827	0.0181405
WBGene00003680	nhr-90	319.441	0.738155	0.219262	3.36655	0.000761153	0.0181489	Nuclear hormone receptor family member nhr-90 [Source:UniProtKB/Swiss-Prot;Acc:O17025]
WBGene00015710	C12D5.9	105.262	1.19418	0.35484	3.36542	0.000764278	0.0181891
WBGene00044541	K09H11.11	24.2084	-1.77463	0.527342	-3.36523	0.000764789	0.0181891
WBGene00220048	R106.6	32.5155	-1.36497	0.405932	-3.36257	0.000772202	0.018342	NA
WBGene00012795	Y43E12A.3	273.044	-1.14456	0.340582	-3.3606	0.000777746	0.0184502
WBGene00001855	hil-4	10226.3	-1.10203	0.328131	-3.3585	0.000783664	0.018526	Histone H1.4 [Source:UniProtKB/Swiss-Prot;Acc:O17536]
WBGene00005602	srj-14	89.2443	-1.15419	0.343601	-3.35911	0.000781952	0.018526	Serpentine Receptor, class J [Source:UniProtKB/TrEMBL;Acc:O01456]
WBGene00016305	fbxc-57	91.4166	-1.09988	0.327499	-3.35841	0.000783921	0.018526
WBGene00001790	gst-42	1455.99	0.896627	0.267032	3.35775	0.000785792	0.0185467	Probable maleylacetoacetate isomerase [Source:UniProtKB/Swiss-Prot;Acc:Q18938]
WBGene00019365	rei-2	657.905	0.650167	0.193693	3.35668	0.000788831	0.0185949	Guanine nucleotide exchange factor rei-2 [Source:UniProtKB/Swiss-Prot;Acc:Q21194]
WBGene00010248	F58D5.9	125.498	-1.0408	0.310316	-3.35401	0.000796497	0.0187519
WBGene00004196	prx-11	238.267	0.842855	0.251591	3.3501	0.00080781	0.0189942	PeRoXisome assembly factor [Source:UniProtKB/TrEMBL;Acc:O62103]
WBGene00219590	linc-72	6.13407	-2.97962	0.889832	-3.34852	0.00081243	0.0190788
WBGene00007824	dlat-2	3742.84	-0.843337	0.251913	-3.34774	0.000814746	0.0190851	DihydroLipoyllysine-residue AcetylTransferase [Source:UniProtKB/TrEMBL;Acc:O45279]
WBGene00021884	Y54G2A.19	525.599	-1.48651	0.444031	-3.34777	0.000814657	0.0190851
WBGene00194998	C16C4.18	40.581	-1.24493	0.371967	-3.34688	0.000817256	0.0190959
WBGene00235090	C38D9.13	10.4261	-2.60269	0.777625	-3.34697	0.000817002	0.0190959
WBGene00010512	K02E11.3	134.347	0.935596	0.279599	3.34621	0.000819254	0.0191187
WBGene00044200	H37A05.4	351.532	-1.57426	0.470695	-3.34453	0.000824216	0.0192104	LOW QUALITY PROTEIN: Uncharacterized protein CELE_H37A05.4 [Source:RefSeq peptide;Acc:NP_001294676]
WBGene00014944	Y68A4A.12	17.4472	-3.47631	1.03962	-3.34384	0.00082627	0.0192342
WBGene00009295	fbxa-180	32.7351	-1.28401	0.384035	-3.34348	0.000827338	0.0192351
WBGene00011141	R08B4.5	78.7824	-2.30451	0.689517	-3.34221	0.000831142	0.0192755
WBGene00018337	F42A9.8	691.615	-1.01833	0.304674	-3.34236	0.000830686	0.0192755
WBGene00012382	ttr-16	9823.61	0.808684	0.242052	3.34096	0.000834907	0.0193387	Transthyretin-like protein 16 [Source:UniProtKB/Swiss-Prot;Acc:P55955]
WBGene00009575	F40F8.1	2784.14	-1.34508	0.402667	-3.34042	0.000836505	0.0193517	UMP-CMP kinase 2 [Source:UniProtKB/Swiss-Prot;Acc:Q20230]
WBGene00018537	F47B7.6	13.7061	-2.59196	0.776133	-3.33958	0.000839046	0.0193864
WBGene00015918	C17G10.6	39.4203	-1.63121	0.488533	-3.33899	0.000840829	0.0194036
WBGene00010985	R03A10.5	355.245	0.868871	0.260255	3.33854	0.000842198	0.0194111
WBGene00012106	T27F6.7	1579.97	-1.03726	0.310887	-3.33645	0.000848561	0.0195096
WBGene00015926	C17H11.6	1551.86	0.447324	0.134061	3.33672	0.000847735	0.0195096
WBGene00009047	F22B8.4	77.1569	1.38334	0.414877	3.33434	0.000855034	0.0196342
WBGene00000283	cah-5	871.523	0.779193	0.233749	3.33346	0.000857721	0.0196717	Putative carbonic anhydrase 5 [Source:UniProtKB/Swiss-Prot;Acc:Q10462]
WBGene00044245	F32A7.8	67.3954	-5.1067	1.53242	-3.33244	0.000860874	0.0197197
WBGene00008537	F02H6.4	775.274	-1.96748	0.59088	-3.32974	0.000869265	0.0198181
WBGene00008684	mig-32	2052.99	-1.41979	0.426402	-3.32969	0.00086942	0.0198181
WBGene00016190	C28G1.5	685.195	0.944752	0.283713	3.32996	0.000868579	0.0198181
WBGene00044285	thn-8	5.33804	-3.49114	1.04827	-3.33037	0.000867299	0.0198181
WBGene00010727	K09G1.1	3277.1	0.725753	0.218139	3.32702	0.000877814	0.019985
WBGene00008070	C43D7.8	29.9109	-1.60436	0.482306	-3.32644	0.000879636	0.0200021
WBGene00001042	dnj-24	682.119	0.708463	0.213018	3.32584	0.000881539	0.0200182	DNaJ domain (Prokaryotic heat shock protein) [Source:UniProtKB/TrEMBL;Acc:Q9TY07]
WBGene00010294	fbxa-129	105.799	-1.31775	0.396253	-3.32553	0.000882493	0.0200182
WBGene00004305	ran-4	5479.03	0.808602	0.243276	3.32381	0.000887964	0.0201178	Probable nuclear transport factor 2 [Source:UniProtKB/Swiss-Prot;Acc:Q21735]
WBGene00008594	clec-57	316.819	0.975852	0.293658	3.32309	0.000890265	0.0201211	C-type LECtin [Source:UniProtKB/TrEMBL;Acc:Q19229]
WBGene00219644	linc-69	6.06802	-3.09677	0.931877	-3.32315	0.000890062	0.0201211	NA
WBGene00002285	let-7	14.7396	-3.00833	0.905527	-3.32219	0.000893141	0.0201616
WBGene00009947	F52H3.5	997.744	1.02925	0.309933	3.32089	0.000897299	0.020231	Tetratricopeptide repeat protein 36 homolog [Source:UniProtKB/Swiss-Prot;Acc:Q20683]
WBGene00255457	F23C8.14	21.6213	-3.04535	0.917316	-3.31985	0.000900674	0.0202826
WBGene00015362	fbxa-105	280.37	0.777474	0.234221	3.3194	0.00090212	0.0202906	F-box A protein [Source:UniProtKB/TrEMBL;Acc:O17054]
WBGene00009638	nspc-14	996.075	0.865605	0.260857	3.31831	0.000905636	0.0203234	Nematode Specific Peptide family, group C [Source:UniProtKB/TrEMBL;Acc:G5EF55]
WBGene00044170	Y51B9A.10	13.3652	-1.70258	0.513093	-3.31827	0.000905757	0.0203234
WBGene00044779	T10H9.8	110.659	1.02677	0.309494	3.31758	0.000908006	0.0203494
WBGene00011310	T01B4.3	236.878	0.784062	0.236418	3.31642	0.000911772	0.0203848
WBGene00015974	snrp-40.2	1521.21	-0.900266	0.27144	-3.31663	0.000911118	0.0203848
WBGene00000676	col-102	392.244	-5.24712	1.58281	-3.31506	0.000916239	0.0204601	COLlagen [Source:UniProtKB/TrEMBL;Acc:Q9GZF7]
WBGene00021040	W05G11.2	77.6443	-1.00341	0.302721	-3.31463	0.000917652	0.0204671
WBGene00020569	lgc-32	249.219	1.05281	0.317772	3.3131	0.000922666	0.0205544	Ligand-Gated ion Channel [Source:UniProtKB/TrEMBL;Acc:Q22588]
WBGene00008933	F18A11.6	15.2669	-2.56441	0.77424	-3.31216	0.000925786	0.0205993
WBGene00007431	C08B6.11	130.322	1.05597	0.318938	3.31089	0.000929986	0.0206681
WBGene00006391	taf-9	1839.07	-0.965611	0.291853	-3.30855	0.000937809	0.0207924	TAF (TBP-associated transcription factor) family [Source:UniProtKB/TrEMBL;Acc:O45784]
WBGene00010092	F55C5.2	91.1732	-1.79749	0.543247	-3.3088	0.000936984	0.0207924
WBGene00219800	C05D9.12	8.50686	-5.47553	1.65533	-3.30781	0.000940288	0.0208226	NA
WBGene00021755	hpo-38	53.9206	-1.12734	0.340895	-3.30701	0.000942989	0.0208576
WBGene00006731	uev-2	37.2025	-1.42657	0.431425	-3.30664	0.000944219	0.0208601	Ubiquitin E2 (Conjugating enzyme) variant [Source:UniProtKB/TrEMBL;Acc:Q20872]
WBGene00050935	Y37H2A.16	30.273	-1.61821	0.489501	-3.30584	0.000946922	0.020895
WBGene00003614	nhr-15	73.2801	-1.14335	0.345988	-3.30458	0.000951178	0.0209641	Nuclear Hormone Receptor family [Source:UniProtKB/TrEMBL;Acc:O61854]
WBGene00017770	F25B4.7	1230.03	-0.517427	0.156714	-3.30172	0.000960938	0.0211543
WBGene00010593	gsnl-1	1185.88	0.816447	0.247468	3.29921	0.000969585	0.0213194	Gelsolin-like protein 1 [Source:UniProtKB/Swiss-Prot;Acc:Q21253]
WBGene00016816	C50E3.5	899.074	-1.36054	0.412436	-3.29879	0.000971033	0.0213213
WBGene00019274	H43I07.1	1030.45	-1.03653	0.314241	-3.29852	0.000971958	0.0213213
WBGene00017688	ttr-35	1323.19	0.851086	0.258079	3.29777	0.000974569	0.0213432	TransThyretin-Related family domain [Source:UniProtKB/TrEMBL;Acc:Q19694]
WBGene00018400	F43H9.4	317.938	0.939423	0.284883	3.29757	0.000975245	0.0213432
WBGene00044260	Y87G2A.19	397.135	-2.38158	0.722323	-3.29711	0.000976836	0.021353
WBGene00010113	F55D12.5	1336.66	-1.34503	0.408023	-3.29644	0.000979168	0.0213789
WBGene00009412	F35E2.5	75.6967	-1.22231	0.370918	-3.29536	0.000982946	0.0214363
WBGene00044289	Y37F4.8	20.8702	-2.2448	0.681868	-3.29213	0.000994306	0.0216587
WBGene00018658	bath-22	83.1714	-1.06232	0.322822	-3.29074	0.000999249	0.021741
WBGene00045062	Y38H8A.8	44.0791	-1.35434	0.411659	-3.28995	0.00100203	0.0217762
WBGene00019278	K01A2.3	75.2026	-1.50731	0.458524	-3.28732	0.00101148	0.0219557
WBGene00011073	R07A4.2	123.634	0.952654	0.28988	3.28638	0.00101485	0.0220033
WBGene00015050	clec-51	663.383	0.786813	0.239663	3.28299	0.00102711	0.0222433	C-type LECtin [Source:UniProtKB/TrEMBL;Acc:Q17450]
WBGene00044296	F10C1.9	293.967	1.07053	0.326136	3.28247	0.00102904	0.0222592
WBGene00012584	ceh-100	1829.84	-0.934105	0.284728	-3.28069	0.00103554	0.0223739	C. Elegans Homeobox [Source:UniProtKB/TrEMBL;Acc:Q7K714]
WBGene00000608	col-19	8437.63	-2.09516	0.638972	-3.27896	0.0010419	0.0224853	Cuticle collagen 19 [Source:UniProtKB/Swiss-Prot;Acc:P18835]
WBGene00008622	F09C8.2	1634.64	-0.897411	0.273787	-3.27777	0.0010463	0.022528
WBGene00019057	F58F9.3	325.283	1.01001	0.30811	3.27807	0.00104521	0.022528
WBGene00008517	F02C12.3	30.831	-1.55409	0.474294	-3.27665	0.00105047	0.022587
WBGene00020761	T24C4.5	772.803	-1.1474	0.350204	-3.27638	0.00105146	0.022587	DNA primase [Source:UniProtKB/TrEMBL;Acc:Q9TZ34]
WBGene00014956	Y102A5C.11	5.50249	-2.7729	0.846523	-3.27563	0.00105427	0.0226214
WBGene00006387	taf-6.1	1425.16	-0.91251	0.278697	-3.27421	0.0010596	0.0226834	TAF (TBP-associated transcription factor) family [Source:UniProtKB/TrEMBL;Acc:A0A0S4XRY0]
WBGene00013208	Y54G9A.5	2198.63	-1.18735	0.362626	-3.27432	0.00105916	0.0226834
WBGene00023172	Y23H5A.8	38.2004	-1.98471	0.606353	-3.2732	0.00106339	0.0227385
WBGene00011437	T04F3.2	100.795	1.15289	0.352342	3.27206	0.00106765	0.0228035
WBGene00020861	T27E4.1	114.585	-0.863131	0.263862	-3.27114	0.00107114	0.0228518
WBGene00010081	F55A11.8	777.349	-1.32448	0.405132	-3.26925	0.00107834	0.0229791
WBGene00017581	F18G5.5	2.89274	-4.6678	1.428	-3.26877	0.00108016	0.0229916
WBGene00004309	rap-3	119.906	1.10549	0.338292	3.26784	0.0010837	0.0230145	RAP homolog (Vertebrate Rap GTPase family) [Source:UniProtKB/TrEMBL;Acc:O01312]
WBGene00022348	Y82E9BR.16	4166.23	-1.13118	0.346132	-3.26806	0.00108288	0.0230145
WBGene00013643	Y105C5A.24	429.375	0.68101	0.208537	3.26566	0.00109209	0.0231662
WBGene00019261	H34I24.2	10523.4	0.764515	0.234156	3.26499	0.0010947	0.0231952
WBGene00013121	spe-38	40.5829	-1.0018	0.307108	-3.26204	0.00110613	0.0233839
WBGene00015136	B0304.4	524.199	-1.28191	0.393017	-3.26172	0.00110737	0.0233839
WBGene00018307	dyla-1	24.6583	-1.87424	0.574606	-3.26179	0.00110713	0.0233839	DYnein Light chain, Axonemal p28 type [Source:UniProtKB/TrEMBL;Acc:Q95YA5]
WBGene00000864	cya-2	19.767	-1.93565	0.593595	-3.26089	0.00111063	0.0233847	CYclin A [Source:UniProtKB/TrEMBL;Acc:Q7Z134]
WBGene00011802	T16G1.9	1511.59	0.690354	0.211711	3.26083	0.00111086	0.0233847
WBGene00015932	C17H12.6	422.923	0.894955	0.274463	3.26075	0.00111117	0.0233847
WBGene00021100	W08F4.11	11.9636	-2.83113	0.868503	-3.25979	0.00111497	0.0234118
WBGene00194795	F42F12.14	3.72041	-3.70379	1.13614	-3.25997	0.00111426	0.0234118
WBGene00007376	C06C3.5	23.3227	-1.39016	0.426772	-3.25739	0.00112442	0.023583
WBGene00021178	Y9C9A.8	159.248	1.30595	0.400956	3.25708	0.00112565	0.023583
WBGene00044502	C46G7.5	142.028	-1.46471	0.449845	-3.25603	0.00112982	0.0236438
WBGene00018666	bath-6	84.5972	-1.21922	0.374833	-3.25271	0.0011431	0.0238681
WBGene00020291	T06D4.2	21.3127	-2.14929	0.660767	-3.25273	0.00114303	0.0238681
WBGene00014148	ZK909.3	1925.76	0.872882	0.268444	3.25163	0.00114745	0.0239012
WBGene00015714	C12D12.3	27.7681	-1.37212	0.421947	-3.25187	0.00114647	0.0239012
WBGene00017711	F22E5.13	132.533	-1.17249	0.360615	-3.25136	0.00114853	0.0239012
WBGene00013246	Y57A10A.1	293.953	-1.17712	0.362113	-3.2507	0.00115123	0.023911
WBGene00019055	F58F9.1	17.7052	-2.14519	0.659934	-3.25061	0.00115156	0.023911
WBGene00194934	ZK809.9	49.0922	-1.14982	0.354104	-3.24712	0.0011658	0.0241796
WBGene00219283	F55H12.7	12.6376	-3.14776	0.969784	-3.24584	0.00117105	0.0242615
WBGene00012404	Y6G8.2	125.482	-1.27631	0.393411	-3.24422	0.00117774	0.0243472
WBGene00015896	C17C3.15	92.1568	-1.19933	0.369684	-3.2442	0.0011778	0.0243472
WBGene00019225	bgal-2	653.025	0.675882	0.20853	3.24118	0.00119036	0.0245526	Beta GALactosidase homolog [Source:UniProtKB/TrEMBL;Acc:O76632]
WBGene00022856	cth-2	5093.45	0.752236	0.232072	3.24139	0.00118948	0.0245526	Putative cystathionine gamma-lyase 2 [Source:UniProtKB/Swiss-Prot;Acc:P55216]
WBGene00008263	C53A5.2	20.41	-1.85342	0.571944	-3.24057	0.00119291	0.0245778
WBGene00007776	dmd-4	43.5357	1.26722	0.391251	3.23889	0.00119995	0.0246739	DM (Doublesex/MAB-3) Domain family [Source:UniProtKB/TrEMBL;Acc:Q18248]
WBGene00020460	nhr-273	54.7031	1.24866	0.385527	3.23883	0.00120021	0.0246739	Nuclear Hormone Receptor family [Source:UniProtKB/TrEMBL;Acc:Q95QB3]
WBGene00019489	K07E1.1	858.068	0.982091	0.303377	3.2372	0.0012071	0.0247881	1,2-dihydroxy-3-keto-5-methylthiopentene dioxygenase homolog 2 [Source:UniProtKB/Swiss-Prot;Acc:Q09407]
WBGene00004468	rpn-12	5661.19	0.555511	0.171796	3.23354	0.00122265	0.0250797	26S proteasome non-ATPase regulatory subunit 8 [Source:UniProtKB/Swiss-Prot;Acc:Q23449]
WBGene00019381	K04C2.3	3433.69	-0.866607	0.268091	-3.23251	0.00122709	0.0251433
WBGene00007392	fbxa-156	104.701	0.772017	0.238909	3.23142	0.00123176	0.0252113	F-box A protein [Source:UniProtKB/TrEMBL;Acc:O17577]
WBGene00010724	K09E9.1	465.191	0.775419	0.24002	3.23064	0.00123513	0.0252248
WBGene00013884	ZC412.3	1198.98	1.09166	0.337905	3.23067	0.00123502	0.0252248
WBGene00021546	laat-1	2813.35	-0.928939	0.287823	-3.22747	0.00124892	0.0254602	Lysosomal amino acid transporter 1 [Source:UniProtKB/Swiss-Prot;Acc:Q95XZ6]
WBGene00219661	linc-45	12.8768	-1.95214	0.604872	-3.22736	0.00124939	0.0254602	NA
WBGene00009347	F32H5.1	1462.17	0.832269	0.257953	3.22644	0.00125341	0.0255144
WBGene00006618	trt-1	989.995	-1.63541	0.507403	-3.2231	0.00126812	0.025593	Telomerase Reverse Transcriptase [Source:UniProtKB/TrEMBL;Acc:O45321]
WBGene00008465	E03A3.5	12.0414	-2.90284	0.900556	-3.22339	0.00126682	0.025593
WBGene00008564	acox-1.1	1042.96	0.705528	0.2189	3.22307	0.00126826	0.025593	Acyl-coenzyme A oxidase [Source:UniProtKB/TrEMBL;Acc:Q7JK62]
WBGene00011324	T01C3.9	972.25	-1.15971	0.359749	-3.22368	0.00126556	0.025593
WBGene00011611	T08D2.6	73.9694	-1.23997	0.384635	-3.22375	0.00126523	0.025593
WBGene00012407	Y7A5A.1	2125.91	0.744655	0.231014	3.22342	0.00126672	0.025593
WBGene00013514	Y73F4A.1	572.722	0.923913	0.286464	3.22523	0.00125871	0.025593	DOMON domain-containing protein Y73F4A.1 [Source:UniProtKB/Swiss-Prot;Acc:Q9XWC2]
WBGene00022775	ZK616.5	1540.89	-1.08946	0.337981	-3.22344	0.00126659	0.025593
WBGene00000628	col-51	186.881	-4.87374	1.51432	-3.21843	0.00128894	0.0259543	COLlagen [Source:UniProtKB/TrEMBL;Acc:Q7Z152]
WBGene00013692	Y105E8B.7	264.821	0.729297	0.226589	3.21859	0.00128825	0.0259543
WBGene00012411	Y7A5A.5	6.52376	-3.51923	1.09395	-3.21699	0.00129543	0.0260568
WBGene00021869	vrp-1	2660	1.04762	0.325829	3.21525	0.00130329	0.026164	Vitellogenin Regulating Protein [Source:UniProtKB/TrEMBL;Acc:H2L0R3]
WBGene00044891	T07C4.12	944.268	-1.05088	0.326848	-3.21519	0.00130357	0.026164
WBGene00019712	rmh-1	496.855	-1.19243	0.370978	-3.2143	0.00130762	0.0262171	RMi1 (RMI1) Homolog [Source:UniProtKB/TrEMBL;Acc:P91399]
WBGene00023355	W02F12.1	26.4893	-1.4622	0.455072	-3.21311	0.00131307	0.0262981
WBGene00001941	his-67	114.48	-2.11859	0.659989	-3.21004	0.00132715	0.0265515	Histone H4 [Source:UniProtKB/Swiss-Prot;Acc:P62784]
WBGene00018109	fbxb-12	117.72	-1.03464	0.322878	-3.20443	0.00135332	0.0270172
WBGene00255714	B0511.19	1098.5	-0.972455	0.30347	-3.20445	0.0013532	0.0270172
WBGene00004044	plk-3	4147.28	-1.66543	0.520105	-3.20211	0.00136426	0.0271545	Serine/threonine-protein kinase plk-3 [Source:UniProtKB/Swiss-Prot;Acc:Q20845]
WBGene00017397	F12A10.8	456.689	-1.59455	0.497978	-3.20204	0.00136457	0.0271545
WBGene00017582	F18G5.6	720.668	-0.802399	0.250559	-3.20244	0.0013627	0.0271545
WBGene00021117	clec-126	33.9185	-2.46842	0.771544	-3.19933	0.00137748	0.0273821	C-type LECtin [Source:UniProtKB/TrEMBL;Acc:O16641]
WBGene00189951	linc-29	77.8269	-1.08798	0.340098	-3.19901	0.00137901	0.0273835
WBGene00000458	ceh-37	641.211	0.646095	0.202066	3.19744	0.00138651	0.0274121	Homeobox protein ceh-37 [Source:UniProtKB/Swiss-Prot;Acc:Q93356]
WBGene00000935	daz-1	5128.32	-1.37545	0.430236	-3.19696	0.00138885	0.0274121	DAZ protein 1 [Source:UniProtKB/Swiss-Prot;Acc:Q20870]
WBGene00001230	eif-3.G	6386.08	0.398414	0.124591	3.19777	0.00138493	0.0274121	Eukaryotic translation initiation factor 3 subunit G [Source:UniProtKB/Swiss-Prot;Acc:Q19706]
WBGene00005228	srh-2	30.5202	-1.84495	0.576957	-3.19773	0.00138515	0.0274121	Serpentine Receptor, class H [Source:UniProtKB/TrEMBL;Acc:A0A0K3ASA1]
WBGene00007296	arrd-25	1753.26	0.737445	0.230654	3.19719	0.00138774	0.0274121	ARRestin Domain protein [Source:UniProtKB/TrEMBL;Acc:Q17624]
WBGene00019058	F58F9.4	74.6447	1.26969	0.397165	3.19687	0.00138928	0.0274121
WBGene00014090	ZK822.2	1744.08	0.634988	0.198657	3.19641	0.0013915	0.027427
WBGene00007644	C17E4.4	282.488	-0.989663	0.309668	-3.19589	0.00139401	0.0274475
WBGene00001372	exo-3	3558.97	-0.931698	0.291569	-3.19546	0.0013961	0.0274595	DNA-(apurinic or apyrimidinic site) lyase [Source:UniProtKB/TrEMBL;Acc:G5EBR7]
WBGene00003845	odd-1	66.5406	1.21954	0.3817	3.19503	0.00139817	0.0274714	Protein odd-skipped-related 1 [Source:UniProtKB/Swiss-Prot;Acc:P41995]
WBGene00019794	M151.2	10.8483	-2.24967	0.704604	-3.19282	0.00140891	0.0276531
WBGene00015113	B0281.6	35.6947	-1.41407	0.442982	-3.19215	0.00141218	0.0276591
WBGene00015359	C02G6.1	42.8517	-1.47756	0.462852	-3.19231	0.00141141	0.0276591
WBGene00008199	C49C3.9	680.605	0.675068	0.211536	3.19126	0.00141652	0.027686
WBGene00019070	F58H7.5	100.605	-1.74082	0.545495	-3.19127	0.0014165	0.027686
WBGene00194921	ZK742.7	59.882	-1.64011	0.514037	-3.19065	0.00141952	0.0277155
WBGene00011501	rmd-1	7931.29	-1.20269	0.377098	-3.18934	0.001426	0.027813	Regulator of microtubule dynamics protein 1 [Source:UniProtKB/Swiss-Prot;Acc:P34560]
WBGene00007178	B0457.2	499.793	0.844746	0.265192	3.18541	0.00144549	0.0281139
WBGene00013226	faah-5	31.4535	-1.32255	0.415175	-3.18553	0.00144487	0.0281139	Fatty Acid Amide Hydrolase homolog [Source:UniProtKB/TrEMBL;Acc:Q9U243]
WBGene00021170	arx-4	3750.43	0.642388	0.201672	3.18532	0.00144595	0.0281139	Probable actin-related protein 2/3 complex subunit 2 [Source:UniProtKB/Swiss-Prot;Acc:Q8WTM6]
WBGene00008547	F07A11.4	864.735	0.946004	0.297098	3.18414	0.00145182	0.0281774	Ubiquitin carboxyl-terminal hydrolase [Source:UniProtKB/TrEMBL;Acc:I2HA92]
WBGene00008662	F10G8.2	18.1129	-3.16329	0.993783	-3.18308	0.00145719	0.0281774
WBGene00011608	T08D2.3	64.3512	-1.26732	0.398154	-3.183	0.0014576	0.0281774
WBGene00011609	T08D2.4	14.0867	-2.38944	0.750482	-3.18387	0.00145319	0.0281774
WBGene00013127	Y52B11A.8	2606.05	-1.32414	0.416023	-3.18286	0.00145828	0.0281774	Phospholipase A2-like protein Y52B11A.8 [Source:UniProtKB/Swiss-Prot;Acc:Q9U256]
WBGene00014672	C08F11.6	25.1516	-1.39294	0.437619	-3.183	0.00145756	0.0281774
WBGene00012159	VY10G11R.1	12.8431	-2.27468	0.715107	-3.18089	0.00146823	0.0283402
WBGene00018756	F53C3.13	5711.84	-0.846105	0.266141	-3.17917	0.00147699	0.0284798
WBGene00010484	dph-3	725.891	-1.89139	0.59544	-3.17646	0.00149086	0.0286695	DPH3 homolog [Source:UniProtKB/Swiss-Prot;Acc:Q21102]
WBGene00020193	T03F1.12	756.213	-1.09481	0.344665	-3.17644	0.00149093	0.0286695
WBGene00020222	fut-6	270.726	0.887727	0.279481	3.17634	0.00149144	0.0286695	Alpha-(1,3)-fucosyltransferase fut-6 [Source:UniProtKB/Swiss-Prot;Acc:G5EEE1]
WBGene00015012	bath-20	35.6019	-1.15471	0.363593	-3.17583	0.00149409	0.0286909	BTB and MATH domain containing [Source:UniProtKB/TrEMBL;Acc:Q3V5H9]
WBGene00044907	K08E7.10	22.547	-2.10964	0.664413	-3.17519	0.00149736	0.0287241
WBGene00004991	spp-6	6.54484	-3.25292	1.02461	-3.1748	0.00149939	0.0287334	SaPosin-like Protein family [Source:UniProtKB/TrEMBL;Acc:Q22337]
WBGene00012228	W03H9.2	91.6456	-1.25975	0.396834	-3.17449	0.00150098	0.0287343
WBGene00000593	col-2	579.419	-4.5379	1.43027	-3.17275	0.00151002	0.0288187	Cuticle collagen 2 [Source:UniProtKB/Swiss-Prot;Acc:P17656]
WBGene00007218	C01A2.6	20.2714	-1.67175	0.526892	-3.17286	0.00150948	0.0288187
WBGene00007710	rsa-1	2446.35	-1.34906	0.425191	-3.17282	0.00150966	0.0288187	Serine/threonine-protein phosphatase 2A regulatory subunit rsa-1 [Source:UniProtKB/Swiss-Prot;Acc:O02217]
WBGene00005556	sri-44	16.7595	-1.87416	0.590791	-3.17229	0.00151244	0.0288285
WBGene00044489	pudl-1	58.2664	-2.01074	0.63389	-3.17206	0.00151363	0.0288285	PUD-Like protein [Source:UniProtKB/TrEMBL;Acc:Q4R163]
WBGene00021531	Y42G9A.1	191.096	0.739554	0.233208	3.17123	0.00151796	0.0288816
WBGene00255426	C04G2.14	185.063	-1.20603	0.380374	-3.17064	0.00152103	0.0289105
WBGene00019624	K10C9.3	2643.84	0.747946	0.235924	3.17028	0.00152291	0.0289167
WBGene00001922	his-48	22.4239	-1.81909	0.573896	-3.16973	0.0015258	0.028942	Probable histone H2B 4 [Source:UniProtKB/Swiss-Prot;Acc:Q27876]
WBGene00007680	maa-1	348.263	0.776851	0.245136	3.16906	0.00152932	0.0289794	Membrane Associated Acyl-CoA binding protein [Source:UniProtKB/TrEMBL;Acc:Q9XTZ5]
WBGene00017407	F12E12.6	12.4985	-2.30437	0.727227	-3.16871	0.0015312	0.0289855
WBGene00021418	Y38F2AL.6	29.9799	-1.85934	0.586872	-3.16822	0.00153375	0.0290044
WBGene00001389	far-5	325.294	0.746705	0.235867	3.16579	0.00154665	0.0292136	Fatty Acid/Retinol binding protein [Source:UniProtKB/TrEMBL;Acc:Q19480]
WBGene00002268	lec-5	6978.63	0.991075	0.313082	3.16554	0.00154795	0.0292136	Galectin [Source:UniProtKB/TrEMBL;Acc:G5EFI4]
WBGene00010828	M02B1.3	6967.16	-0.914851	0.289213	-3.16324	0.00156023	0.0294157
WBGene00006662	twk-7	234.581	-0.907732	0.287167	-3.16099	0.00157232	0.0296137	TWiK family of potassium channels protein 7 [Source:UniProtKB/Swiss-Prot;Acc:P34410]
WBGene00000915	daf-21	70478.5	-0.659923	0.208921	-3.15871	0.00158469	0.0297202	Heat shock protein 90 [Source:UniProtKB/Swiss-Prot;Acc:Q18688]
WBGene00002063	ife-5	576.686	-0.977794	0.309554	-3.15872	0.00158463	0.0297202	Eukaryotic translation initiation factor 4E-5 [Source:UniProtKB/Swiss-Prot;Acc:P56570]
WBGene00021626	rft-2	1492.94	-0.869556	0.27523	-3.15938	0.00158107	0.0297202	RiboFlavin Transporter; Riboflavin transporter [Source:UniProtKB/TrEMBL;Acc:Q95XZ2]
WBGene00021671	Y48G1BM.6	60.1802	-1.14102	0.361257	-3.15848	0.00158595	0.0297202
WBGene00022255	Y73B6BL.36	107.994	0.80324	0.254277	3.15891	0.00158359	0.0297202
WBGene00195170	linc-61	11.0286	-3.48525	1.10376	-3.15761	0.00159067	0.0297788
WBGene00012650	orc-1	3329.62	-1.05728	0.334968	-3.15635	0.00159758	0.0298782	ORC (Origin Recognition Complex) subunit [Source:UniProtKB/TrEMBL;Acc:Q9XX17]
WBGene00016112	C25H3.3	805.478	-0.779681	0.247076	-3.15563	0.00160154	0.0299222
WBGene00004094	ppw-2	3753.18	-0.581863	0.184417	-3.15515	0.00160416	0.0299411	Piwi-like protein [Source:UniProtKB/TrEMBL;Acc:Q9N585]
WBGene00022272	Y73E7A.5	11.2193	-1.83587	0.581947	-3.1547	0.00160665	0.0299575
WBGene00219771	linc-24	28.3247	-1.92958	0.612008	-3.15286	0.00161679	0.0301165	NA
WBGene00015393	C03G6.5	296.5	0.898838	0.285147	3.1522	0.00162047	0.030155	UPF0376 protein C03G6.5 [Source:UniProtKB/Swiss-Prot;Acc:O01454]
WBGene00018533	F47B7.2	2752.26	0.490142	0.155511	3.15181	0.00162261	0.0301647	Sulfhydryl oxidase [Source:UniProtKB/TrEMBL;Acc:Q95QF9]
WBGene00004168	pqn-88	150.508	1.15684	0.367556	3.1474	0.00164731	0.0305022	Prion-like-(Q/N-rich)-domain-bearing protein [Source:UniProtKB/TrEMBL;Acc:Q95XP2]
WBGene00015830	fbxb-98	25.0409	-1.289	0.409502	-3.14773	0.00164546	0.0305022	F-box B protein [Source:UniProtKB/TrEMBL;Acc:O16550]
WBGene00020994	W03F8.4	2733.51	-0.598036	0.189995	-3.14764	0.00164597	0.0305022
WBGene00044019	C55A6.12	644.84	1.01623	0.322817	3.148	0.00164393	0.0305022
WBGene00012426	Y11D7A.1	19.9451	-1.8033	0.573057	-3.1468	0.00165066	0.0305339
WBGene00015021	B0205.6	2508.19	0.563912	0.179362	3.14398	0.00166665	0.0307991
WBGene00219424	Y54G2A.72	3.13558	-4.91247	1.56265	-3.14367	0.00166842	0.0308014
WBGene00008910	F17C8.3	134.258	1.05353	0.335276	3.14228	0.00167638	0.0308872
WBGene00019988	R09F10.5	185.391	0.699342	0.222544	3.14249	0.00167516	0.0308872
WBGene00007226	C01G6.4	1853.8	-0.777522	0.247524	-3.1412	0.00168258	0.0309708
WBGene00007254	C01H6.4	316.924	0.636887	0.202789	3.14065	0.00168575	0.0309832	Flavin-containing monooxygenase [Source:UniProtKB/TrEMBL;Acc:Q17585]
WBGene00009606	F40G12.11	687.997	-1.77138	0.564098	-3.1402	0.00168835	0.0309832
WBGene00016319	C32D5.12	236.012	1.15702	0.368486	3.13993	0.0016899	0.0309832
WBGene00077568	C56A3.10	15.4149	-2.02758	0.64566	-3.14033	0.00168758	0.0309832
WBGene00003856	odr-10	29.8534	-1.37504	0.437992	-3.13941	0.00169286	0.0310069	Serpentine receptor class r-10 [Source:UniProtKB/Swiss-Prot;Acc:Q18807]
WBGene00000139	amx-3	180.464	0.606507	0.193284	3.1379	0.00170163	0.031137	AMine oXidase family [Source:UniProtKB/TrEMBL;Acc:E0AHD3]
WBGene00004810	skr-4	1268.33	0.993752	0.3168	3.13685	0.00170776	0.0311448	SKp1 Related (Ubiquitin ligase complex component) [Source:UniProtKB/TrEMBL;Acc:Q9U1Y9]
WBGene00011712	T11F9.10	26.4037	-1.91365	0.609986	-3.1372	0.0017057	0.0311448
WBGene00016530	C39D10.2	227.546	-1.50769	0.480664	-3.13668	0.00170874	0.0311448
WBGene00017930	F29G9.1	13.5596	-2.79376	0.890609	-3.13691	0.00170736	0.0311448
WBGene00014140	ZK899.1	259.286	-0.86711	0.276652	-3.1343	0.00172267	0.0313682
WBGene00021673	Y48G1BM.8	45.2882	-1.64679	0.525578	-3.1333	0.00172851	0.0314436
WBGene00014914	Y52B11A.11	19.7724	-1.52949	0.488219	-3.1328	0.0017315	0.0314673
WBGene00010338	F59F4.3	569.704	0.523111	0.167054	3.1314	0.00173976	0.0315559
WBGene00206474	T22A3.12	15.5005	-1.87256	0.597945	-3.13166	0.0017382	0.0315559
WBGene00043056	nfya-2	632.878	-0.94854	0.303062	-3.12985	0.00174893	0.0316916	Nuclear transcription Factor Y, A (Alpha) subunit [Source:UniProtKB/TrEMBL;Acc:F3Y5S3]
WBGene00003911	pak-1	2582.34	0.511921	0.163594	3.12922	0.00175271	0.0316984	Serine/threonine-protein kinase pak-1 [Source:UniProtKB/Swiss-Prot;Acc:Q17850]
WBGene00015850	C16C8.12	330.1	-1.82447	0.583004	-3.12943	0.00175148	0.0316984
WBGene00219548	JC8.17	12.8363	-1.86116	0.594882	-3.12862	0.00175627	0.031732
WBGene00219620	linc-74	9.46564	-2.54264	0.813253	-3.1265	0.00176898	0.0319306	NA
WBGene00011299	ikke-1	1881.23	-1.42444	0.455746	-3.12551	0.00177496	0.0320077	Inhibitor of nuclear factor kappa-B kinase epsilon subunit homolog 1 [Source:UniProtKB/Swiss-Prot;Acc:P32742]
WBGene00020322	T07F12.2	931.494	-0.928215	0.297103	-3.12422	0.00178276	0.0321172
WBGene00015639	C09E7.5	8.9758	-2.25288	0.721401	-3.12293	0.0017906	0.0321653
WBGene00022760	ZK546.3	21.0044	-3.35771	1.07507	-3.12324	0.00178872	0.0321653
WBGene00050917	Y53G8AL.4	27.0739	-2.14124	0.685603	-3.12315	0.00178924	0.0321653
WBGene00219735	linc-150	9.55757	-3.05764	0.97925	-3.12243	0.00179367	0.0321893	NA
WBGene00021022	W04B5.5	1113.92	-0.705947	0.226203	-3.12086	0.00180326	0.0323303
WBGene00011045	gpx-2	2213.66	0.755615	0.242169	3.1202	0.00180725	0.0323709	Glutathione peroxidase 2 [Source:UniProtKB/Swiss-Prot;Acc:O62327]
WBGene00013268	tric-1B.2	1233.36	-0.778444	0.249546	-3.11944	0.00181195	0.0324238	Trimeric intracellular cation channel type 1B.2 [Source:UniProtKB/Swiss-Prot;Acc:Q9NA73]
WBGene00219564	linc-102	7.22333	-2.16689	0.69504	-3.11766	0.00182295	0.0325894
WBGene00006407	lim-9	2008.13	0.776088	0.248973	3.11715	0.00182609	0.0326142	LIM domain family; LIM-9 isoform [Source:UniProtKB/TrEMBL;Acc:G5EF39]
WBGene00007124	B0250.7	286.8	-1.5487	0.496889	-3.11679	0.0018283	0.0326225
WBGene00012104	sygl-1	2815.97	-0.922138	0.295986	-3.11547	0.0018365	0.0327374
WBGene00008863	F15D4.6	39.3851	-1.47194	0.472838	-3.11299	0.00185201	0.0329824
WBGene00077531	F40G9.15	68.7038	-1.00498	0.323261	-3.10887	0.00187802	0.0334136
WBGene00012923	fbxa-128	382.505	0.871363	0.280522	3.10622	0.00189497	0.0336832	F-box A protein [Source:UniProtKB/TrEMBL;Acc:Q9U2D3]
WBGene00012545	Y37D8A.3	713.742	1.05143	0.338527	3.1059	0.001897	0.0336872
WBGene00010537	mys-2	1887.25	-0.828789	0.267209	-3.10165	0.00192448	0.0341102	Histone acetyltransferase [Source:UniProtKB/TrEMBL;Acc:A0A131MAQ8]
WBGene00012290	W05H12.2	18.5994	-1.44758	0.466679	-3.10189	0.00192293	0.0341102
WBGene00045338	M01B2.13	71.7709	0.907627	0.292696	3.10091	0.00192924	0.034162
WBGene00022776	perm-3	2817.84	-0.664802	0.214435	-3.10024	0.00193361	0.0342069	PERMeable eggshell [Source:UniProtKB/TrEMBL;Acc:V6CM14]
WBGene00019727	zig-12	3818.33	0.851934	0.274909	3.09896	0.00194199	0.0343226	2 (Zwei) IG domain protein [Source:UniProtKB/TrEMBL;Acc:Q21465]
WBGene00008596	clec-54	89.8646	1.01479	0.327526	3.09835	0.00194599	0.0343608	C-type LECtin [Source:UniProtKB/TrEMBL;Acc:Q19226]
WBGene00001605	gln-4	17.8673	-3.16634	1.02233	-3.09719	0.00195368	0.0344639
WBGene00009651	F43D2.2	557.999	-1.5282	0.493487	-3.09673	0.00195665	0.0344836
WBGene00002234	kqt-2	393.383	0.805502	0.260176	3.09599	0.00196159	0.0345381	Potassium channel, KvQLT family [Source:UniProtKB/TrEMBL;Acc:Q9GYM8]
WBGene00044262	Y95D11A.2	16.9875	-1.51329	0.488868	-3.09551	0.00196475	0.0345611
WBGene00219755	linc-17	16.1049	-2.02628	0.654852	-3.09425	0.00197308	0.0346749	NA
WBGene00018712	F52G3.4	3.40602	-3.729	1.2054	-3.09359	0.00197748	0.0346868
WBGene00219763	linc-94	9.23758	-2.41212	0.779672	-3.09376	0.00197636	0.0346868	NA
WBGene00009634	nspc-9	891.169	0.837179	0.270688	3.09278	0.00198289	0.0347242	Nematode Specific Peptide family, group C [Source:UniProtKB/TrEMBL;Acc:Q20345]
WBGene00010418	H27A22.1	1336.63	-0.691376	0.22355	-3.09272	0.00198334	0.0347242
WBGene00019077	zipt-11	3421.56	-0.819036	0.264931	-3.09151	0.00199143	0.0348332	Zrt (ZRT), Irt-(IRT-) like Protein Transporter [Source:UniProtKB/TrEMBL;Acc:P91354]
WBGene00014157	ZK930.7	34.9406	-2.70882	0.876511	-3.09046	0.00199846	0.0349226
WBGene00195184	F19G12.8	27.4737	-1.51851	0.491399	-3.09019	0.00200029	0.0349226
WBGene00019076	mrpl-24	1131.11	0.571646	0.185148	3.08751	0.00201841	0.035206	Probable 39S ribosomal protein L24, mitochondrial [Source:UniProtKB/Swiss-Prot;Acc:P91353]
WBGene00012498	Y24F12A.3	93.1236	-1.42353	0.461179	-3.08673	0.00202375	0.0352661
WBGene00016057	C24D10.6	1772.34	-0.817204	0.265026	-3.08349	0.00204591	0.035619
WBGene00015260	B0554.7	18.4588	-2.60432	0.844802	-3.08276	0.00205089	0.0356725
WBGene00000380	cct-5	23425.7	0.458491	0.148893	3.07934	0.00207458	0.0360509	T-complex protein 1 subunit epsilon [Source:UniProtKB/Swiss-Prot;Acc:P47209]
WBGene00219282	F43G9.21	4.50303	-3.0539	0.992235	-3.0778	0.00208536	0.0362044
WBGene00044420	C50D2.10	268.496	-0.903905	0.294036	-3.07412	0.00211121	0.0366193
WBGene00002099	ins-16	28.0017	-2.41134	0.784581	-3.0734	0.00211631	0.0366395	INSulin related [Source:UniProtKB/TrEMBL;Acc:Q7KX46]
WBGene00007073	ugt-2	335.316	0.789662	0.256917	3.07361	0.00211483	0.0366395	UDP-GlucuronosylTransferase [Source:UniProtKB/TrEMBL;Acc:Q17404]
WBGene00008536	F02H6.3	473.819	-1.85052	0.602212	-3.07287	0.00212011	0.0366712
WBGene00021827	dnc-6	1980.54	-0.955007	0.31089	-3.07185	0.00212736	0.0367625	Dynactin subunit 6 [Source:UniProtKB/Swiss-Prot;Acc:Q9N3F1]
WBGene00016900	C53C11.2	129.373	-1.79553	0.585018	-3.06919	0.00214643	0.0370578
WBGene00003659	nhr-69	1148.65	0.675408	0.220146	3.068	0.00215494	0.0371659	Nuclear hormone receptor family member nhr-69 [Source:UniProtKB/Swiss-Prot;Acc:P91829]
WBGene00015920	eif-3.L	6377.73	0.56288	0.183515	3.06721	0.00216067	0.0371659	Eukaryotic translation initiation factor 3 subunit L [Source:UniProtKB/Swiss-Prot;Acc:Q95QW0]
WBGene00021975	Y58A7A.1	535.099	0.683043	0.222684	3.06732	0.00215989	0.0371659
WBGene00044004	C24A8.6	28.9696	-1.48012	0.48256	-3.06723	0.00216054	0.0371659
WBGene00012704	mlt-3	292.663	0.814397	0.265587	3.0664	0.00216651	0.0372321
WBGene00017906	F28F9.2	8.14012	-3.83655	1.25134	-3.06596	0.00216975	0.0372534
WBGene00008298	C54D10.3	1246.38	-0.85109	0.277719	-3.06457	0.00217981	0.0373917
WBGene00020755	grl-31	8.95269	-2.75931	0.900828	-3.06308	0.00219068	0.0375436	GRound-Like (Grd related) [Source:UniProtKB/TrEMBL;Acc:Q9TXS7]
WBGene00003696	nhr-106	154.589	0.733069	0.239588	3.05971	0.00221552	0.0379344	Nuclear hormone receptor family member nhr-106 [Source:UniProtKB/Swiss-Prot;Acc:O16966]
WBGene00044563	T26C11.8	9.91123	-1.92287	0.628528	-3.05932	0.00221843	0.0379495
WBGene00016764	C49A9.10	391.349	-0.890179	0.291058	-3.05842	0.00222506	0.0380279
WBGene00009957	F53B2.8	2957.12	0.77277	0.252719	3.05783	0.00222949	0.0380687
WBGene00014052	ZK669.2	238.466	0.810047	0.265274	3.05362	0.00226097	0.038571
WBGene00013730	sql-1	589.122	-0.943946	0.309208	-3.05279	0.00226727	0.0386077	Suppressor of gpa-3QL dye-filling defect [Source:UniProtKB/TrEMBL;Acc:D0Z5P0]
WBGene00018367	F42H10.3	605.373	0.699138	0.228999	3.05301	0.00226558	0.0386077	LIM and SH3 domain protein F42H10.3 [Source:UniProtKB/Swiss-Prot;Acc:P34416]
WBGene00008648	F10D11.2	885.15	-1.52076	0.498562	-3.0503	0.00228611	0.0388409
WBGene00011688	T10C6.6	4239.87	-1.0163	0.333138	-3.05068	0.00228321	0.0388409
WBGene00220140	Y34F4.7	4.7728	-4.29406	1.40781	-3.05016	0.00228721	0.0388409
WBGene00015769	C14C11.7	930.208	-1.17803	0.386333	-3.04926	0.00229409	0.0389223
WBGene00007327	C05C9.3	43.7906	-1.63799	0.537313	-3.04848	0.00230001	0.0389873
WBGene00022376	Y94H6A.3	1572.68	-1.04504	0.342914	-3.04752	0.00230736	0.0390764
WBGene00015510	erp-44.2	1622.16	0.725319	0.238037	3.04708	0.00231073	0.0390979	Thioredoxin domain-containing protein C06A6.5 [Source:UniProtKB/Swiss-Prot;Acc:Q17688]
WBGene00021898	Y54G2A.36	274.675	-1.43493	0.471257	-3.0449	0.0023276	0.0393477
WBGene00008258	mans-2	1512.09	0.705285	0.231753	3.04326	0.00234032	0.0395268	Mannosyl-oligosaccharide 1,2-alpha-mannosidase C52E4.5 [Source:UniProtKB/Swiss-Prot;Acc:Q18788]
WBGene00001591	glc-1	837.708	0.953033	0.313222	3.04268	0.00234484	0.0395674	Glutamate-gated chloride channel alpha [Source:UniProtKB/Swiss-Prot;Acc:G5EBR3]
WBGene00002043	hyl-1	2258.34	-0.698629	0.229659	-3.04202	0.00234995	0.0396176	Ceramide synthase hyl-1 [Source:UniProtKB/Swiss-Prot;Acc:G5ED45]
WBGene00010370	ctg-1	1536.71	0.663412	0.218114	3.04158	0.00235341	0.0396403	CRAL/TRIO and GOLD domain containing [Source:UniProtKB/TrEMBL;Acc:K8F7T8]
WBGene00007378	C06C3.8	18.8738	-1.30266	0.428443	-3.04045	0.00236227	0.0396819
WBGene00008170	C48B4.7	1828.58	-0.926724	0.304769	-3.04075	0.00235992	0.0396819
WBGene00022573	ZC239.15	51.639	1.28903	0.423934	3.04065	0.0023607	0.0396819
WBGene00011529	T06D8.9	4646.57	-1.14441	0.37653	-3.03936	0.00237083	0.0397563
WBGene00019296	mcu-1	2214.42	-0.747698	0.246029	-3.03907	0.0023731	0.0397563	Calcium uniporter protein, mitochondrial [Source:UniProtKB/Swiss-Prot;Acc:Q21121]
WBGene00023489	F42A10.9	401.835	0.686991	0.226048	3.03913	0.00237259	0.0397563
WBGene00003014	lin-28	1907.32	-1.26826	0.417397	-3.0385	0.00237758	0.0397956
WBGene00006479	tmbi-4	1799.04	0.625162	0.205921	3.03593	0.00239791	0.0401	Transmembrane BAX inhibitor motif-containing protein 4 [Source:UniProtKB/Swiss-Prot;Acc:Q11080]
WBGene00008486	ugt-44	1784.07	0.432713	0.142577	3.03495	0.00240578	0.0401911	UDP-GlucuronosylTransferase [Source:UniProtKB/TrEMBL;Acc:O17757]
WBGene00012239	W04A8.4	1151.29	-1.02009	0.336141	-3.03471	0.00240767	0.0401911
WBGene00014730	F01D5.4	9.64409	-2.08028	0.685598	-3.03425	0.00241131	0.0402158
WBGene00001765	gst-17	5.44309	-3.35551	1.10668	-3.03205	0.00242899	0.0403533	Glutathione S-Transferase [Source:UniProtKB/TrEMBL;Acc:Q93699]
WBGene00014001	pyk-2	1546.3	0.4975	0.164052	3.03257	0.00242481	0.0403533	Pyruvate kinase [Source:UniProtKB/TrEMBL;Acc:D3YT37]
WBGene00016609	C43E11.12	854.198	-0.953311	0.314426	-3.03191	0.00243013	0.0403533
WBGene00019569	K09D9.12	75.9923	-1.31125	0.432488	-3.03188	0.00243037	0.0403533
WBGene00219306	linc-4	37.3932	-2.3075	0.760945	-3.03242	0.00242604	0.0403533
WBGene00219574	linc-54	10.9203	-2.57571	0.84999	-3.03029	0.00244319	0.04053
WBGene00012188	W01G7.4	3024.12	-1.41975	0.468616	-3.02966	0.0024483	0.0405787
WBGene00016115	mdt-26	3819.98	-0.63285	0.208928	-3.02904	0.0024533	0.0406255	MeDiaTor [Source:UniProtKB/TrEMBL;Acc:D7SFJ3]
WBGene00000251	bli-1	233.568	-2.9602	0.978033	-3.02669	0.00247245	0.0408598	Cuticle collagen bli-1 [Source:UniProtKB/Swiss-Prot;Acc:Q09457]
WBGene00000502	chp-1	2733.91	0.630108	0.208195	3.02653	0.00247377	0.0408598	CHORD Protein; CHORD containing protein [Source:UniProtKB/TrEMBL;Acc:G5EEI8]
WBGene00000679	col-105	20.8427	-2.25312	0.744759	-3.0253	0.00248386	0.0408598	COLlagen [Source:UniProtKB/TrEMBL;Acc:O44173]
WBGene00003437	msp-42	13.6569	-4.65918	1.54006	-3.02531	0.00248377	0.0408598
WBGene00007593	C14H10.3	1239.74	0.650264	0.214907	3.02579	0.00247984	0.0408598
WBGene00010053	F54D5.9	3190.52	-0.974853	0.322218	-3.02545	0.00248263	0.0408598
WBGene00010539	ttr-2	18327	0.76748	0.253699	3.02516	0.00248499	0.0408598	Transthyretin-like protein 2 [Source:UniProtKB/Swiss-Prot;Acc:P34500]
WBGene00018267	F41C3.1	12.3112	-3.26462	1.07907	-3.02541	0.00248294	0.0408598
WBGene00022798	fahd-1	759.366	0.506844	0.167586	3.02438	0.0024914	0.0409292	Fumarylacetoacetate hydrolase domain-containing protein 1 [Source:UniProtKB/Swiss-Prot;Acc:P34673]
WBGene00006635	tsp-9	818.424	0.712922	0.235827	3.02307	0.0025022	0.0409983	Tetraspanin [Source:UniProtKB/TrEMBL;Acc:Q18177]
WBGene00007647	C17E4.10	1785.8	-1.32552	0.43845	-3.0232	0.00250113	0.0409983
WBGene00015133	mrpl-11	2923.95	0.580954	0.192158	3.02332	0.00250021	0.0409983	Probable 39S ribosomal protein L11, mitochondrial [Source:UniProtKB/Swiss-Prot;Acc:P34264]
WBGene00014884	Y39E4B.14	96.0387	-1.39856	0.46297	-3.02085	0.00252066	0.0412644
WBGene00010295	fbxa-193	135.06	-1.21277	0.40166	-3.0194	0.00253278	0.0413902
WBGene00050947	K07C5.13	23.4242	-1.92262	0.636748	-3.01944	0.0025324	0.0413902
WBGene00006965	xtr-1	144.99	0.920556	0.304924	3.01897	0.00253637	0.0414126	MX region of TRA-2 Related [Source:UniProtKB/TrEMBL;Acc:Q20791]
WBGene00000012	abf-1	5.93461	-2.23491	0.740897	-3.01649	0.00255715	0.0415795	Antibacterial factor-related peptide 1 [Source:UniProtKB/Swiss-Prot;Acc:G5EGC4]
WBGene00008830	nhr-176	172.828	0.783778	0.259859	3.01617	0.00255988	0.0415795	Nuclear Hormone Receptor family [Source:UniProtKB/TrEMBL;Acc:O45365]
WBGene00014135	ZK896.4	235.404	0.768668	0.254819	3.01653	0.0025569	0.0415795
WBGene00016464	C36B7.1	12.9137	1.95395	0.647768	3.01643	0.00255767	0.0415795
WBGene00022357	kbp-4	1594.41	-1.37184	0.454831	-3.01616	0.00255997	0.0415795	KNL (Kinetochore null) Binding Protein [Source:UniProtKB/TrEMBL;Acc:Q9N2X3]
WBGene00045434	Y95D11A.3	1039.15	-0.677118	0.22444	-3.01692	0.00255354	0.0415795
WBGene00008415	mce-1	2305.04	0.554072	0.183799	3.01455	0.00257357	0.041764	Methylmalonyl-CoA Epimerase; Mitochondrial methylmalonyl-CoA epimerase [Source:UniProtKB/TrEMBL;Acc:G5EEG4]
WBGene00009078	rpb-12	1593.73	-1.6601	0.550817	-3.01388	0.00257926	0.0417836	RNA Polymerase II (B) subunit [Source:UniProtKB/TrEMBL;Acc:X5M5N4]
WBGene00013436	Y66D12A.10	2726.34	-1.1	0.364947	-3.01412	0.00257723	0.0417836
WBGene00235256	Y54G11A.19	186.189	-0.952494	0.31633	-3.01107	0.00260325	0.0421356
WBGene00020988	W03D8.7	13.1882	-1.97527	0.656081	-3.01071	0.00260636	0.0421494
WBGene00044082	D1086.12	639.492	0.897724	0.298238	3.01009	0.00261166	0.0421985
WBGene00000286	cal-2	284.045	0.76054	0.252796	3.00852	0.00262527	0.0422701	CALmodulin related genes; Calmodulin-like protein [Source:UniProtKB/TrEMBL;Acc:G5EEG0]
WBGene00004311	ras-2	1187.88	-0.73926	0.245724	-3.00849	0.00262546	0.0422701	GTP binding protein; R-RAS related [Source:UniProtKB/TrEMBL;Acc:G5EGA7]
WBGene00007622	C16C10.1	1277.96	-0.961925	0.319735	-3.0085	0.00262539	0.0422701	Uncharacterized mitochondrial carrier C16C10.1 [Source:UniProtKB/Swiss-Prot;Acc:Q09461]
WBGene00016490	C36E6.2	857.87	0.437839	0.145528	3.00862	0.00262437	0.0422701
WBGene00018683	F52D1.2	52.1576	1.30593	0.434113	3.00827	0.00262743	0.0422701
WBGene00006939	wee-1.2	64.7692	-1.67658	0.557428	-3.00771	0.00263224	0.042311
WBGene00022203	Y73B3A.1	2005.02	-0.956006	0.317934	-3.00693	0.00263903	0.0423666
WBGene00022485	fbxa-63	272.463	0.774624	0.257625	3.00679	0.00264024	0.0423666	F-box A protein [Source:UniProtKB/TrEMBL;Acc:Q95Y64]
WBGene00003249	mig-18	205.537	0.707373	0.235482	3.00393	0.00266515	0.0426747
WBGene00021175	math-46	15.9915	-2.71254	0.903038	-3.0038	0.00266631	0.0426747	MATH (Meprin-associated Traf homology) domain containing [Source:UniProtKB/TrEMBL;Acc:O44886]
WBGene00219207	C01F6.14	103.332	-1.96531	0.654258	-3.00388	0.00266563	0.0426747
WBGene00013445	Y66D12A.19	622.704	-1.03869	0.345877	-3.00307	0.00267273	0.0427041
WBGene00017118	E04A4.3	12.7849	-1.64225	0.546831	-3.00321	0.00267144	0.0427041
WBGene00000648	col-72	82.6082	-4.32591	1.44091	-3.00221	0.00268027	0.0427879	COLlagen [Source:UniProtKB/TrEMBL;Acc:H2L0P1]
WBGene00006779	unc-43	4095.36	0.576728	0.1922	3.00066	0.00269394	0.0429693	Calcium/calmodulin-dependent protein kinase type II [Source:RefSeq peptide;Acc:NP_001023293]
WBGene00008343	C56A3.4	914.233	-0.95997	0.319988	-3.00001	0.00269967	0.043024
WBGene00005299	srh-78	5.9823	-2.38138	0.793897	-2.99961	0.0027033	0.043045	Serpentine Receptor, class H [Source:UniProtKB/TrEMBL;Acc:Q9UAW3]
WBGene00000202	exos-4.2	1775.59	-0.97618	0.325667	-2.99748	0.00272225	0.0432729	EXOSome (Multiexonuclease complex) component [Source:UniProtKB/TrEMBL;Acc:Q9N4P9]
WBGene00013685	Y105E8A.28	58.6454	-1.19751	0.399487	-2.99762	0.00272101	0.0432729
WBGene00014158	ZK938.1	59.6313	-3.37644	1.12672	-2.9967	0.00272917	0.043309	Serine/threonine-protein phosphatase [Source:UniProtKB/TrEMBL;Acc:G5ECL6]
WBGene00021892	Y54G2A.28	23.7307	-1.7596	0.587176	-2.99671	0.0027291	0.043309
WBGene00045297	fbxc-43	46.1951	-0.883247	0.294837	-2.99572	0.00273799	0.043412	F-box C protein [Source:UniProtKB/TrEMBL;Acc:A3KFE7]
WBGene00044942	F54E7.11	3.73274	-4.41742	1.47517	-2.99452	0.00274878	0.043546
WBGene00206532	F11A6.15	17.3555	-2.21112	0.738917	-2.99238	0.00276814	0.0438156
WBGene00255375	F08B4.8	102.409	-4.7457	1.58666	-2.99101	0.00278061	0.0439756
WBGene00194981	Y49E10.30	8.79305	-2.82625	0.945036	-2.99063	0.00278404	0.0439926
WBGene00017453	F14D2.5	56.2402	-1.28798	0.430736	-2.99018	0.00278815	0.0440202
WBGene00012639	fezf-1	17.9896	-1.47186	0.492487	-2.98862	0.0028024	0.0442077	FEZ Family zinc finger protein [Source:UniProtKB/TrEMBL;Acc:O62425]
WBGene00003861	oig-3	142.859	-1.58486	0.530449	-2.98778	0.00281011	0.0442919	One IG domain [Source:UniProtKB/TrEMBL;Acc:Q9NAF4]
WBGene00023209	ZC513.7	5939.6	-0.921058	0.308415	-2.98642	0.00282261	0.0444513
WBGene00016255	C30E1.6	9.19415	-2.60966	0.87416	-2.98534	0.00283265	0.0445718
WBGene00004749	sdn-1	3811.1	0.443015	0.148464	2.984	0.00284509	0.0447109	Probable syndecan [Source:UniProtKB/Swiss-Prot;Acc:P50605]
WBGene00045268	ttr-42	1870.64	0.967142	0.324123	2.98387	0.00284628	0.0447109	TransThyretin-Related family domain [Source:UniProtKB/TrEMBL;Acc:A2V8C3]
WBGene00012472	Y17G7B.21	1994.12	-0.941868	0.315759	-2.98287	0.00285557	0.0447814
WBGene00044403	fbxa-219	67.5599	1.02711	0.344323	2.98299	0.00285451	0.0447814	F-box A protein [Source:UniProtKB/TrEMBL;Acc:Q4W5Q7]
WBGene00020695	T22F3.2	2580.81	-0.598602	0.200704	-2.98251	0.00285898	0.0447971
WBGene00006638	tsp-12	3320.58	-0.883012	0.296279	-2.98034	0.00287931	0.0450778	Tetraspanin [Source:UniProtKB/TrEMBL;Acc:Q22495]
WBGene00003903	pab-2	5500.98	-0.517222	0.173605	-2.9793	0.00288906	0.0451925	Polyadenylate-binding protein [Source:UniProtKB/TrEMBL;Acc:Q19581]
WBGene00017705	F22E5.6	28.6164	-1.37066	0.460244	-2.97812	0.0029002	0.0452908
WBGene00022107	Y71F9AL.1	1090.59	-0.529664	0.177848	-2.97819	0.00289957	0.0452908
WBGene00000770	cpb-1	1411.45	-1.2328	0.41404	-2.97748	0.00290624	0.045332	Cytoplasmic polyadenylation element-binding protein 1 [Source:UniProtKB/Swiss-Prot;Acc:Q03571]
WBGene00004381	rnf-5	2658	-0.665659	0.223576	-2.97733	0.00290771	0.045332	RING finger protein 5 [Source:UniProtKB/Swiss-Prot;Acc:Q09463]
WBGene00018602	F48D6.4	6498.18	0.954568	0.320799	2.9756	0.00292415	0.0454364
WBGene00019310	K02E7.5	21.3685	-1.44927	0.486973	-2.97608	0.00291962	0.0454364
WBGene00021082	zip-11	478.074	-0.935568	0.314391	-2.97581	0.0029222	0.0454364	BZIP transcription factor family [Source:UniProtKB/TrEMBL;Acc:Q9N5A8]
WBGene00021952	vha-19	9314.87	0.556145	0.186883	2.97589	0.00292136	0.0454364	Vacuolar H ATPase [Source:UniProtKB/TrEMBL;Acc:Q9TYW1]
WBGene00017332	ugt-37	20.3711	-1.53947	0.51744	-2.97517	0.00292825	0.0454622	UDP-GlucuronosylTransferase [Source:UniProtKB/TrEMBL;Acc:O16915]
WBGene00003254	mig-23	829.491	0.599799	0.201774	2.97262	0.00295269	0.0456517	Nucleoside-diphosphatase mig-23 [Source:UniProtKB/Swiss-Prot;Acc:Q21815]
WBGene00014034	ZK643.2	1110.2	-0.739181	0.248662	-2.97263	0.00295258	0.0456517	Probable deoxycytidylate deaminase [Source:UniProtKB/Swiss-Prot;Acc:P30648]
WBGene00018375	F43C9.1	209.305	0.678785	0.228321	2.97294	0.00294961	0.0456517
WBGene00018665	bath-4	307.908	-0.845859	0.284546	-2.97266	0.0029523	0.0456517	BTB and MATH domain containing [Source:UniProtKB/TrEMBL;Acc:O44815]
WBGene00022115	Y71F9AL.10	1277	-0.72752	0.244692	-2.97321	0.00294704	0.0456517
WBGene00008043	C40H1.8	159.634	0.952335	0.320427	2.97208	0.00295793	0.0456948
WBGene00013998	ZK550.4	2073.98	-0.778256	0.261894	-2.97164	0.0029621	0.0457213	TFIIE-alpha protein [Source:UniProtKB/TrEMBL;Acc:G5EG49]
WBGene00000971	dhs-7	194.914	1.18224	0.397932	2.97096	0.00296874	0.0457481	DeHydrogenases, Short chain [Source:UniProtKB/TrEMBL;Acc:Q19062]
WBGene00010644	K07G5.5	235.956	0.864198	0.290875	2.97103	0.00296805	0.0457481
WBGene00021096	W08F4.7	6.91946	-2.60256	0.876084	-2.97067	0.00297151	0.0457529
WBGene00235163	Y108G3AL.10	39.399	-1.73952	0.585693	-2.97002	0.00297784	0.0458125
WBGene00019795	M151.3	126.338	-1.56371	0.526551	-2.96972	0.00298071	0.0458189
WBGene00003967	pdr-1	2387.75	-0.831315	0.280131	-2.96759	0.0030014	0.046061	Parkinson's Disease Related [Source:UniProtKB/TrEMBL;Acc:V6CLF7]
WBGene00016427	C34H4.5	486.722	-0.833284	0.280779	-2.96775	0.00299987	0.046061
WBGene00000660	col-85	362.588	-3.58761	1.20907	-2.96726	0.0030047	0.0460737	COLlagen [Source:UniProtKB/TrEMBL;Acc:O18097]
WBGene00194955	F37H8.6	8.43543	-2.74552	0.925805	-2.96555	0.00302139	0.0462916
WBGene00004106	pqn-15	67.155	-1.44653	0.487868	-2.965	0.00302688	0.0463376	Prion-like-(Q/N-rich)-domain-bearing protein [Source:UniProtKB/TrEMBL;Acc:P91094]
WBGene00003660	nhr-70	774.149	0.641112	0.216259	2.96455	0.00303121	0.0463659	Nuclear Hormone Receptor family [Source:UniProtKB/TrEMBL;Acc:G5EEL3]
WBGene00011696	eea-1	978.748	-1.31026	0.442077	-2.96386	0.00303802	0.046432	EEA1; EEA1 (Early Endosome Antigen, Rab effector) homolog [Source:UniProtKB/TrEMBL;Acc:G5ED80]
WBGene00015126	B0303.4	1641.51	-1.15619	0.390197	-2.96311	0.00304551	0.0465083
WBGene00219639	linc-115	7.17621	-2.32828	0.786026	-2.96208	0.00305564	0.0466247	NA
WBGene00020449	fbxa-54	296.895	0.70547	0.23823	2.96129	0.00306349	0.0467063	F-box A protein [Source:UniProtKB/TrEMBL;Acc:Q9TZ21]
WBGene00005291	srh-70	11.3728	-1.92872	0.651444	-2.96068	0.00306963	0.0467618	Serpentine Receptor, class H [Source:UniProtKB/TrEMBL;Acc:O18104]
WBGene00021030	W04H10.1	9.53615	-3.16301	1.06863	-2.95988	0.00307758	0.0468445
WBGene00001571	gei-14	926.445	-1.42814	0.482738	-2.95842	0.00309224	0.0469974	GEX Interacting protein [Source:UniProtKB/TrEMBL;Acc:Q21088]
WBGene00001762	gst-14	18.5134	1.45932	0.493284	2.95837	0.00309267	0.0469974	Glutathione S-Transferase [Source:UniProtKB/TrEMBL;Acc:Q93696]
WBGene00020304	fbxa-200	52.6498	-1.89346	0.640219	-2.95752	0.00310129	0.0470522
WBGene00020314	T07E3.3	1791.12	-1.16507	0.393936	-2.95751	0.00310132	0.0470522
WBGene00013248	Y57A10A.3	174.047	-0.799349	0.270419	-2.95596	0.00311696	0.047251
WBGene00015059	B0228.1	169.843	1.09626	0.370947	2.95529	0.0031238	0.0473163
WBGene00011543	acl-2	1065.63	-0.737873	0.249753	-2.95442	0.00313261	0.0474112	Putative 1-acyl-sn-glycerol-3-phosphate acyltransferase acl-2 [Source:UniProtKB/Swiss-Prot;Acc:Q22267]
WBGene00018280	F41C6.7	120.228	0.852069	0.288464	2.95381	0.00313876	0.0474659
WBGene00007819	C30F2.5	118.279	0.776008	0.26289	2.95183	0.00315896	0.0477081
WBGene00219452	F21D9.11	92.9138	-1.03192	0.349598	-2.95174	0.0031599	0.0477081
WBGene00045362	F11D11.12	5.5034	-3.24738	1.10082	-2.94995	0.00317821	0.0479457
WBGene00235286	C01F6.16	29.107	-2.13827	0.724913	-2.9497	0.00318088	0.0479471
WBGene00013556	Y75B8A.23	70.3543	-1.97746	0.670485	-2.9493	0.00318495	0.0479698
WBGene00016487	C36C9.4	5.48175	-3.05169	1.03605	-2.94551	0.00322423	0.0485221
WBGene00012127	T28D6.7	803.935	0.822194	0.279271	2.94407	0.00323924	0.0487088
WBGene00044249	F55B11.6	19.6958	-1.32138	0.448872	-2.94377	0.00324242	0.0487173
WBGene00017801	F26A1.1	2036.38	-1.03161	0.350489	-2.94335	0.00324681	0.0487441
WBGene00007301	C04F12.7	88.5207	-4.56106	1.55032	-2.94201	0.0032609	0.0488933
WBGene00007499	C09H10.5	1033.19	-0.938305	0.318972	-2.94166	0.00326462	0.0488933
WBGene00012745	Y40H7A.7	16.44	-1.95033	0.66297	-2.94181	0.00326302	0.0488933
WBGene00016639	C44B12.6	57.4999	-1.27244	0.432598	-2.94139	0.00326744	0.0488961
WBGene00021515	set-23	713.015	-0.941702	0.320686	-2.93652	0.00331913	0.0496299	Probable histone-lysine N-methyltransferase set-23 [Source:UniProtKB/Swiss-Prot;Acc:Q95Y12]
WBGene00012144	T28H10.3	7679.88	1.01169	0.344554	2.93622	0.00332235	0.0496382
WBGene00008988	F20G2.5	130.361	0.979143	0.333636	2.93477	0.003338	0.0498321
WBGene00008980	emre-1	668.949	-1.15289	0.393375	-2.93078	0.00338113	0.0504356	Essential MCU regulator, mitochondrial [Source:UniProtKB/Swiss-Prot;Acc:Q9U3I4]
WBGene00003625	nhr-31	1173.67	0.853384	0.291239	2.93018	0.0033876	0.0504918	Nuclear hormone receptor family member nhr-31 [Source:UniProtKB/Swiss-Prot;Acc:Q18192]
WBGene00010524	K03B8.6	296.61	1.53012	0.522269	2.92975	0.00339235	0.0505222
WBGene00021662	snpc-3.3	46.0331	-1.38231	0.471985	-2.92871	0.00340366	0.0506502	SNAPc (Small Nuclear RNA Activating Complex) homolog [Source:UniProtKB/TrEMBL;Acc:Q9N3Q1]
WBGene00219413	Y38F2AL.12	18.7457	-1.9838	0.677631	-2.92755	0.00341642	0.0507995
WBGene00003356	mir-262	15.5549	-1.4138	0.483076	-2.92666	0.00342627	0.0508912
WBGene00004890	smp-2	775.382	1.0637	0.363491	2.92635	0.00342967	0.0508912	SeMaPhorin related [Source:UniProtKB/TrEMBL;Acc:Q9TYS4]
WBGene00021829	mrpl-17	1568.72	-1.09132	0.37294	-2.92625	0.00343078	0.0508912	Mitochondrial Ribosomal Protein, Large [Source:UniProtKB/TrEMBL;Acc:Q9N3F3]
WBGene00001094	dars-1	11724.6	0.492329	0.168268	2.92586	0.00343503	0.0509138	Aspartate--tRNA ligase, cytoplasmic [Source:UniProtKB/Swiss-Prot;Acc:Q03577]
WBGene00044325	tag-321	1533.38	-0.896706	0.306537	-2.92528	0.0034415	0.0509691
WBGene00003724	nhr-134	281.956	0.524407	0.179311	2.92457	0.00344932	0.0510041	Nuclear hormone receptor family member nhr-134 [Source:UniProtKB/Swiss-Prot;Acc:O16361]
WBGene00013766	prmt-1	19902.2	-0.870668	0.297705	-2.9246	0.00344903	0.0510041	Protein arginine N-methyltransferase 1 [Source:UniProtKB/Swiss-Prot;Acc:Q9U2X0]
WBGene00077652	ZK228.12	8.75064	-3.05487	1.04521	-2.92274	0.00346964	0.0512231
WBGene00195071	C16C8.21	10.1968	-1.71247	0.585899	-2.92281	0.00346892	0.0512231
WBGene00016097	C25E10.8	1016.73	0.567362	0.194144	2.92238	0.00347369	0.0512424
WBGene00011612	T08D2.7	35.8913	-1.39397	0.477078	-2.92189	0.00347918	0.0512828
WBGene00022589	ZC317.6	10.4602	-2.19693	0.752046	-2.92127	0.00348613	0.0513447
WBGene00004771	sem-2	772.111	0.727521	0.249067	2.92098	0.00348927	0.0513504	Transcription factor sem-2 [Source:UniProtKB/Swiss-Prot;Acc:Q8T3B9]
WBGene00021323	Y34B4A.7	955.215	0.492878	0.168756	2.92066	0.00349289	0.0513632
WBGene00000017	abf-6	377.798	0.874996	0.299784	2.91875	0.00351434	0.0516378	ABF-6; AntiBacterial Factor related [Source:UniProtKB/TrEMBL;Acc:G5EBS3]
WBGene00010317	idh-1	8645.15	-0.632129	0.216679	-2.91735	0.00353015	0.0518293	Isocitrate dehydrogenase [NADP] [Source:UniProtKB/TrEMBL;Acc:H9G2T4]
WBGene00011681	T10B10.4	1041.57	0.509893	0.174916	2.91506	0.00355617	0.0521702
WBGene00017986	F32D1.7	5193.56	-1.10515	0.379241	-2.91411	0.00356706	0.0522889
WBGene00019311	K02E7.6	255.968	-1.08287	0.371933	-2.91147	0.00359734	0.0526912
WBGene00000552	cmd-1	15300.7	0.570044	0.19591	2.90972	0.00361751	0.0529034	Calmodulin [Source:UniProtKB/Swiss-Prot;Acc:O16305]
WBGene00007257	C01H6.8	249.658	0.590823	0.203078	2.90934	0.0036219	0.0529034
WBGene00016501	C37C3.9	2618.85	-1.37855	0.473854	-2.90923	0.00362317	0.0529034
WBGene00044903	K03H1.13	621.35	-0.784205	0.269528	-2.90955	0.00361947	0.0529034
WBGene00020067	clec-158	6.84615	-2.2742	0.782092	-2.90784	0.00363939	0.0530987	C-type lectin domain-containing protein 158 [Source:UniProtKB/Swiss-Prot;Acc:Q21984]
WBGene00014977	ZC15.4	13.4848	-1.62632	0.559346	-2.90755	0.00364277	0.0531064
WBGene00008770	F13G3.12	115.966	0.869073	0.298989	2.9067	0.00365262	0.0532083
WBGene00016299	C32B5.6	18.976	-1.6424	0.565188	-2.90594	0.00366148	0.053276
WBGene00017970	F32A5.4	2322.24	0.81925	0.281935	2.90582	0.00366298	0.053276
WBGene00011503	gcc-2	1554.34	-1.20413	0.414497	-2.90503	0.00367213	0.0533675	GRIP and coiled-coil domain-containing protein 2 [Source:UniProtKB/Swiss-Prot;Acc:P34562]
WBGene00219337	T16G1.18	4.10489	-2.89437	0.996531	-2.90445	0.00367901	0.0534259
WBGene00006372	syx-2	768.871	0.84505	0.291045	2.9035	0.00369015	0.0534776	Putative syntaxin-2 [Source:UniProtKB/Swiss-Prot;Acc:Q20574]
WBGene00006609	tre-3	890.696	0.528206	0.181951	2.903	0.00369602	0.0534776	Trehalase [Source:UniProtKB/TrEMBL;Acc:G5EG27]
WBGene00011393	T03D8.6	1887.66	0.718927	0.247646	2.90304	0.00369557	0.0534776
WBGene00013158	Y53F4B.11	192.862	-2.83362	0.97619	-2.90273	0.00369925	0.0534776
WBGene00019133	F59H6.2	60.7709	-1.7403	0.599539	-2.90273	0.00369927	0.0534776
WBGene00044505	D2024.10	4.67754	-2.39838	0.826264	-2.90269	0.00369978	0.0534776
WBGene00014159	arrd-4	461.541	0.872696	0.300777	2.90147	0.00371417	0.0536024	ARRestin Domain protein [Source:UniProtKB/TrEMBL;Acc:Q23672]
WBGene00017745	F23F1.4	886.447	0.668866	0.230521	2.90154	0.00371337	0.0536024
WBGene00007734	C25G4.7	21.7513	-1.87928	0.648595	-2.89746	0.00376192	0.0541241
WBGene00019735	M02F4.1	7.15179	-2.07598	0.716476	-2.89748	0.00376173	0.0541241
WBGene00044227	C07A9.13	17.1367	-2.00461	0.691833	-2.89754	0.00376102	0.0541241
WBGene00077525	C41G7.8	354.191	0.820548	0.283155	2.89788	0.00375694	0.0541241
WBGene00008080	C44B9.3	1516.42	-1.03657	0.357794	-2.89711	0.0037662	0.0541439
WBGene00015939	C18A3.1	464.706	-0.857712	0.296217	-2.89555	0.00378491	0.0543709	DNA N6-methyl methyltransferase [Source:UniProtKB/Swiss-Prot;Acc:Q09956]
WBGene00012764	Y41E3.6	12.3144	-2.40155	0.829689	-2.89452	0.00379743	0.0544668
WBGene00022257	puf-11	8928.61	-0.930491	0.32144	-2.89476	0.00379452	0.0544668	PUF (Pumilio/FBF) domain-containing [Source:UniProtKB/TrEMBL;Acc:Q8IU00]
WBGene00004310	ras-1	592.263	0.585213	0.202257	2.89341	0.00381086	0.0545299	GTP binding protein; R-RAS related; R-ras1 homolog [Source:UniProtKB/TrEMBL;Acc:G5EBK8]
WBGene00017612	F19G12.4	29.6148	-1.54971	0.535642	-2.89319	0.00381352	0.0545299
WBGene00020658	T21F4.1	1429.39	0.674172	0.232996	2.8935	0.0038098	0.0545299
WBGene00235359	F56D6.22	16.362	-3.87113	1.33788	-2.89348	0.00380999	0.0545299
WBGene00017017	D1014.4	743.22	-0.939412	0.324736	-2.89285	0.00381764	0.054547
WBGene00220227	Y110A2AL.20	59.7518	-1.1712	0.40499	-2.89192	0.003829	0.0546673
WBGene00011166	chil-22	204.716	0.82426	0.28518	2.89032	0.00384853	0.0549041	CHItinase-Like [Source:UniProtKB/TrEMBL;Acc:Q21866]
WBGene00004267	rab-3	548.623	0.917472	0.317505	2.88963	0.00385693	0.0549184	Ras-related protein Rab-3 [Source:UniProtKB/Swiss-Prot;Acc:Q94986]
WBGene00006861	cal-5	2839.51	0.52936	0.183202	2.88949	0.0038587	0.0549184	CALmodulin related genes [Source:UniProtKB/TrEMBL;Acc:Q18136]
WBGene00007978	C36B1.11	2026.42	-1.39369	0.482363	-2.88929	0.00386111	0.0549184
WBGene00009162	F26E4.7	326.639	0.583176	0.201842	2.88927	0.00386131	0.0549184
WBGene00001734	grl-25	520.592	-4.13007	1.42982	-2.88852	0.00387061	0.0549915	GRound-Like (Grd related) [Source:UniProtKB/TrEMBL;Acc:G5EDQ6]
WBGene00044359	C16C4.17	12.9671	-1.79419	0.621177	-2.88838	0.00387235	0.0549915
WBGene00010522	K03A11.5	280.999	0.851589	0.294858	2.88813	0.00387536	0.0549924
WBGene00016494	C37A2.8	2390.74	-0.867532	0.300493	-2.88703	0.00388901	0.0551441
WBGene00000713	col-140	16531.1	-1.40111	0.485462	-2.88614	0.00390005	0.0552586	COLlagen [Source:UniProtKB/TrEMBL;Acc:Q19813]
WBGene00013742	sas-1	1379.76	-0.961099	0.333066	-2.88561	0.00390659	0.0553093
WBGene00022801	pcp-5	2223.4	0.630417	0.218491	2.88532	0.00391015	0.0553176	Prolyl carboxy peptidase like protein 5 [Source:UniProtKB/Swiss-Prot;Acc:P34676]
WBGene00008521	F02D8.4	886.946	0.529015	0.183503	2.88287	0.00394068	0.0557073
WBGene00009946	ogr-2	595.831	-1.17536	0.407773	-2.88238	0.00394678	0.0557349
WBGene00014576	Y43F11A.6	422.369	-0.55158	0.191404	-2.88176	0.00395459	0.0557349
WBGene00014668	C06C3.9	8.24411	-2.52053	0.874591	-2.88196	0.00395216	0.0557349
WBGene00022111	Y71F9AL.6	141.732	-1.44467	0.501251	-2.88213	0.00394996	0.0557349
WBGene00010080	F55A11.7	2013.37	-1.11301	0.38632	-2.88106	0.00396337	0.0557743
WBGene00018274	F41C3.8	210.745	0.586768	0.203662	2.88109	0.00396298	0.0557743
WBGene00008171	C48B4.8	516.895	-0.697518	0.242176	-2.88022	0.00397403	0.05583
WBGene00014218	ZK1098.1	2268.01	-1.50864	0.523814	-2.8801	0.00397546	0.05583	WW domain-containing protein ZK1098.1 [Source:UniProtKB/Swiss-Prot;Acc:P34600]
WBGene00021302	Y32G9A.3	10.9533	-3.24446	1.12653	-2.88004	0.00397631	0.05583
WBGene00021076	W07E6.5	140.03	-1.42143	0.493635	-2.87952	0.00398283	0.0558795
WBGene00016883	C52E2.4	89.4814	0.981861	0.341114	2.87839	0.00399707	0.0559957
WBGene00022335	Y82E9BR.2	474.57	-0.979472	0.340285	-2.87839	0.00399712	0.0559957
WBGene00013602	Y87G2A.16	86.7936	-1.28168	0.445351	-2.87791	0.00400324	0.0559972
WBGene00219769	linc-64	6.41855	-2.64706	0.919712	-2.87814	0.00400025	0.0559972	NA
WBGene00021195	Y17G9A.2	28.5796	1.34567	0.467774	2.87676	0.00401787	0.0561238
WBGene00045457	F33H12.7	334.892	-1.46025	0.507611	-2.87672	0.00401831	0.0561238
WBGene00000134	amt-2	26.0984	-1.35278	0.470322	-2.87628	0.00402388	0.0561596	Putative ammonium transporter 2 [Source:UniProtKB/Swiss-Prot;Acc:Q20605]
WBGene00013198	Y54E5A.2	166.015	-1.27382	0.442909	-2.87603	0.0040271	0.0561625
WBGene00019332	K02F3.9	1083.5	0.733889	0.255236	2.87534	0.00403598	0.0562443
WBGene00018772	F53G12.4	40.0312	-1.24766	0.433992	-2.87485	0.00404218	0.0562887
WBGene00219678	linc-9	42.7697	-1.28926	0.448583	-2.87408	0.00405208	0.0563844	NA
WBGene00019125	ddl-1	482.712	-0.638694	0.222287	-2.87329	0.00406224	0.0564836	WASH complex subunit homolog 3 [Source:UniProtKB/Swiss-Prot;Acc:O01901]
WBGene00009632	ttyh-1	1547.04	0.70834	0.246794	2.87017	0.00410247	0.0569067	Protein tweety homolog 1 [Source:UniProtKB/Swiss-Prot;Acc:Q20332]
WBGene00017372	F10G7.9	1388.64	-0.996419	0.347205	-2.86983	0.00410695	0.0569067
WBGene00020985	W03D8.2	127.923	-1.24747	0.434694	-2.86975	0.00410793	0.0569067	Serine/threonine-protein phosphatase [Source:UniProtKB/TrEMBL;Acc:O45001]
WBGene00021906	Y55B1AR.2	1763.36	-0.744739	0.259453	-2.87042	0.0040993	0.0569067
WBGene00077663	F55C9.14	51.0564	-0.978341	0.340908	-2.86981	0.00410716	0.0569067
WBGene00001856	hil-5	6657.2	-0.572256	0.19943	-2.86946	0.00411169	0.0569166	Histone H1.5 [Source:UniProtKB/Swiss-Prot;Acc:O01833]
WBGene00015783	C15B12.1	231.412	0.802458	0.279684	2.86915	0.00411571	0.0569299	Putative sarcosine oxidase [Source:UniProtKB/Swiss-Prot;Acc:Q18006]
WBGene00012333	sre-43	17.6237	-1.62093	0.565066	-2.86858	0.00412324	0.0569917	Serpentine Receptor, class E (Epsilon) [Source:UniProtKB/TrEMBL;Acc:Q9XUJ9]
WBGene00016354	rig-6	665.191	-0.928483	0.323725	-2.86812	0.00412917	0.0570315	Contactin rig-6 [Source:UniProtKB/Swiss-Prot;Acc:H2KZ60]
WBGene00003755	nlp-17	107.538	-1.60525	0.559986	-2.86658	0.00414928	0.0572668	Neuropeptide-Like Protein [Source:UniProtKB/TrEMBL;Acc:O62455]
WBGene00015423	C04E6.7	365.201	0.723724	0.252595	2.86515	0.00416808	0.0574837
WBGene00008554	F07C6.3	570.871	0.899422	0.313959	2.86477	0.00417309	0.0574848
WBGene00009380	F34H10.3	1432.69	0.846667	0.295554	2.86468	0.00417432	0.0574848
WBGene00010383	mpst-3	889.9	0.650064	0.226952	2.86432	0.00417909	0.0575079	Sulfurtransferase [Source:UniProtKB/TrEMBL;Acc:Q9XTW9]
WBGene00004811	skr-5	120.055	0.86374	0.301685	2.86306	0.00419575	0.0576522	SKp1 Related (Ubiquitin ligase complex component) [Source:UniProtKB/TrEMBL;Acc:Q9XU27]
WBGene00021495	sqst-2	174.495	0.68346	0.238711	2.86313	0.00419482	0.0576522	SeQueSTosome related [Source:UniProtKB/TrEMBL;Acc:Q9N3Z0]
WBGene00014888	Y43F8B.8	10.3559	-1.86493	0.651484	-2.86259	0.00420195	0.0576948
WBGene00022211	Y73B3A.9	87.7879	-1.04971	0.366826	-2.8616	0.00421515	0.0578335
WBGene00008133	efsc-1	625.336	-0.539535	0.188638	-2.86016	0.00423426	0.0580103	Eukaryotic Elongation Factor, SelenoCysteine-tRNA-specific [Source:UniProtKB/TrEMBL;Acc:O62109]
WBGene00220243	ZK484.11	3.6424	-3.6591	1.27925	-2.86034	0.00423191	0.0580103
WBGene00001231	eif-3.H	4212.08	0.687989	0.240775	2.85739	0.00427145	0.0584769	Eukaryotic translation initiation factor 3 subunit H [Source:UniProtKB/Swiss-Prot;Acc:O01974]
WBGene00013634	Y105C5A.9	3.58846	-4.24463	1.48582	-2.85675	0.00428002	0.0585512
WBGene00000654	col-78	3.73438	-3.78488	1.3259	-2.85459	0.00430929	0.0586077	COLlagen [Source:UniProtKB/TrEMBL;Acc:Q9U336]
WBGene00001426	fkb-1	7096.68	0.660789	0.231389	2.85576	0.00429346	0.0586077	Peptidylprolyl isomerase [Source:UniProtKB/TrEMBL;Acc:Q20107]
WBGene00003800	npp-14	5420.93	-0.779206	0.272861	-2.85569	0.0042943	0.0586077	Nuclear pore complex protein 14 [Source:UniProtKB/Swiss-Prot;Acc:Q17602]
WBGene00013036	fbxa-218	36.6871	-0.972975	0.340821	-2.8548	0.00430637	0.0586077	F-box A protein [Source:UniProtKB/TrEMBL;Acc:D1MN88]
WBGene00015574	irg-1	540.968	1.07199	0.375447	2.85524	0.00430041	0.0586077	Infection Response protein [Source:UniProtKB/TrEMBL;Acc:O16327]
WBGene00017450	bath-27	176.994	-0.974298	0.341238	-2.85519	0.00430109	0.0586077	BTB and MATH domain containing [Source:UniProtKB/TrEMBL;Acc:O44810]
WBGene00017590	F19B10.11	11.2935	-1.71711	0.601315	-2.8556	0.00429562	0.0586077
WBGene00018688	F52D2.6	7.61909	-3.13357	1.09773	-2.8546	0.00430907	0.0586077
WBGene00019647	K11D12.7	1446.74	0.621333	0.217718	2.85384	0.00431949	0.0587035
WBGene00017355	F10E9.3	2566.06	-0.784512	0.274935	-2.85345	0.00432479	0.0587328
WBGene00000287	cal-3	88.9239	1.04976	0.368014	2.85251	0.00433753	0.0588629	CALmodulin related genes [Source:UniProtKB/TrEMBL;Acc:U4PQW9]
WBGene00001208	egl-44	1080.14	0.752699	0.263939	2.85179	0.00434737	0.0588756	Transcription enhancer factor-like protein egl-44 [Source:UniProtKB/Swiss-Prot;Acc:Q19849]
WBGene00011083	glo-1	524.149	0.704684	0.247101	2.85181	0.00434712	0.0588756	Gut granule LOss; Rab GTPase GLO-1 [Source:UniProtKB/TrEMBL;Acc:G5EBF0]
WBGene00014095	gdh-1	25637.3	-0.601541	0.210938	-2.85175	0.00434794	0.0588756	Glutamate dehydrogenase [Source:UniProtKB/TrEMBL;Acc:Q23621]
WBGene00021611	nhr-238	68.8584	0.832587	0.292006	2.85127	0.00435456	0.0589225	Nuclear Hormone Receptor family [Source:UniProtKB/TrEMBL;Acc:Q966B7]
WBGene00010982	flp-32	191.572	-1.90102	0.666887	-2.85058	0.00436395	0.0590067	FMRF-Like Peptide [Source:UniProtKB/TrEMBL;Acc:Q21656]
WBGene00017729	F22H10.5	23.1323	-1.62664	0.57084	-2.84955	0.00437804	0.0591115
WBGene00021820	nipa-1	1738.9	-0.739288	0.259422	-2.84975	0.00437532	0.0591115	NIPA1 (NonImprinted gene in Prader-Willi/Angelman syndrome region 1) homolog [Source:UniProtKB/TrEMBL;Acc:A3KFD2]
WBGene00009358	F33C8.4	344.167	0.836575	0.293614	2.84923	0.00438252	0.0591151
WBGene00020350	T08B2.12	12.0251	-4.43075	1.55515	-2.84908	0.00438465	0.0591151
WBGene00010901	M28.10	6804.5	0.690891	0.242612	2.84772	0.00440339	0.0593248
WBGene00009543	F38E11.6	48.2248	-1.2268	0.430947	-2.84674	0.00441692	0.0593785
WBGene00018522	F46H5.7	5299.18	0.483542	0.169833	2.84717	0.00441103	0.0593785
WBGene00022259	Y73C8B.2	443.825	0.466756	0.163958	2.8468	0.00441608	0.0593785
WBGene00009276	F30F8.9	1190.57	-0.523931	0.184111	-2.84574	0.0044308	0.0595215
WBGene00017632	F20B6.9	16.7684	-2.19473	0.771295	-2.84552	0.00443395	0.0595215
WBGene00007450	C08F11.1	75.5092	1.16784	0.41048	2.84506	0.00444033	0.0595643
WBGene00004186	prpf-4	4246.26	-0.992373	0.348967	-2.84375	0.00445864	0.059767	Vertebrate Pre-mRNA Processing Factor [Source:UniProtKB/TrEMBL;Acc:E3W737]
WBGene00013842	fbxa-34	101.78	-0.86887	0.305748	-2.84178	0.00448621	0.0600933
WBGene00012040	T26E3.7	31.2367	-1.50406	0.529351	-2.84133	0.00449256	0.0601352
WBGene00021479	oac-55	65.6874	-1.46946	0.517374	-2.84024	0.00450799	0.0602984	O-ACyltransferase homolog [Source:UniProtKB/TrEMBL;Acc:Q9N3Z2]
WBGene00001578	ges-1	1524.4	0.984492	0.346693	2.83967	0.00451608	0.0603634	Gut esterase 1 [Source:UniProtKB/Swiss-Prot;Acc:Q04457]
WBGene00001935	his-61	152.283	-1.65244	0.582265	-2.83796	0.0045403	0.0605568	Histone H2A [Source:UniProtKB/Swiss-Prot;Acc:P09588]
WBGene00011635	T09A5.7	998.115	-0.670287	0.236181	-2.83802	0.00453938	0.0605568
WBGene00016642	chil-10	1164.65	0.783829	0.27619	2.83801	0.00453957	0.0605568	CHItinase-Like [Source:UniProtKB/TrEMBL;Acc:Q18607]
WBGene00007283	clec-222	1292.03	1.14687	0.404171	2.83758	0.00454568	0.0605852	C-type LECtin [Source:UniProtKB/TrEMBL;Acc:O62024]
WBGene00017941	F31A9.2	5.83271	-2.38392	0.840218	-2.83727	0.00455014	0.0606013
WBGene00010123	F55G11.2	308.91	1.0239	0.360986	2.83641	0.00456241	0.0606908
WBGene00018562	F47D12.6	243.599	-1.43637	0.506417	-2.83634	0.00456337	0.0606908
WBGene00009512	bigr-1	443.408	0.915323	0.32284	2.83522	0.00457936	0.0608601
WBGene00020158	T02C5.1	6177.49	0.765277	0.270009	2.83426	0.00459317	0.0610002
WBGene00017732	F23C8.3	123.956	0.723426	0.255293	2.83371	0.00460116	0.0610628
WBGene00000709	col-136	3.30535	-4.18214	1.47607	-2.8333	0.00460708	0.0610979
WBGene00006759	unc-22	1886.82	1.1703	0.413197	2.8323	0.00462151	0.0612457	Twitchin [Source:UniProtKB/Swiss-Prot;Acc:Q23551]
WBGene00009323	best-13	674.681	0.622395	0.219809	2.83153	0.00463257	0.0612627	Bestrophin homolog 13 [Source:UniProtKB/Swiss-Prot;Acc:O45435]
WBGene00009805	F47B8.4	144.798	1.20692	0.426244	2.83153	0.00463265	0.0612627
WBGene00010019	F54B8.4	861.803	0.481558	0.170054	2.83179	0.00462887	0.0612627
WBGene00012765	Y41E3.7	4606.07	-0.748999	0.264555	-2.83116	0.00463788	0.0612759
WBGene00019592	K09F6.9	153.771	-1.7402	0.614694	-2.831	0.00464022	0.0612759
WBGene00219636	linc-81	18.8116	-1.2491	0.441261	-2.83075	0.00464383	0.0612802	NA
WBGene00007022	mdt-22	1195.23	-0.803108	0.283984	-2.828	0.00468392	0.0617655	Mediator of RNA polymerase II transcription subunit 22 [Source:UniProtKB/Swiss-Prot;Acc:Q23679]
WBGene00003230	mex-5	16486.5	-0.997692	0.353119	-2.82537	0.00472262	0.0621002	Zinc finger protein mex-5 [Source:UniProtKB/Swiss-Prot;Acc:Q9XUB2]
WBGene00003723	nhr-133	263.115	0.566373	0.200456	2.82543	0.00472172	0.0621002	Nuclear hormone receptor family member nhr-133 [Source:UniProtKB/Swiss-Prot;Acc:O16354]
WBGene00007749	ceh-79	278.312	0.645699	0.228533	2.8254	0.00472214	0.0621002	C. Elegans Homeobox [Source:UniProtKB/TrEMBL;Acc:O02224]
WBGene00009219	dpm-3	1296.13	-1.6493	0.583691	-2.82564	0.0047186	0.0621002	Probable dolichol-phosphate mannosyltransferase subunit 3 [Source:UniProtKB/Swiss-Prot;Acc:Q9XVV5]
WBGene00000184	arf-6	1401.42	-0.678423	0.240138	-2.82513	0.00472608	0.0621018	ADP-Ribosylation Factor related [Source:UniProtKB/TrEMBL;Acc:Q9U2S4]
WBGene00008366	tpra-1	432.203	0.642006	0.227436	2.82279	0.0047607	0.0625127	Transmembrane protein adipocyte-associated 1 homolog [Source:UniProtKB/Swiss-Prot;Acc:Q18936]
WBGene00017069	timm-17B.2	364.69	-1.14157	0.404575	-2.82165	0.00477778	0.0626928	Translocase, Inner Mitochondrial Membrane [Source:UniProtKB/TrEMBL;Acc:Q19012]
WBGene00006703	ubc-6	2112.83	-0.584721	0.20729	-2.82078	0.00479064	0.0628173	UBiquitin Conjugating enzyme [Source:UniProtKB/TrEMBL;Acc:Q18931]
WBGene00004911	snf-12	132.168	0.802924	0.284944	2.81783	0.00483491	0.0633533	Transporter [Source:UniProtKB/TrEMBL;Acc:O45813]
WBGene00012101	zip-10	1086.96	0.60935	0.216286	2.81734	0.00484232	0.0634059	BZIP transcription factor family [Source:UniProtKB/TrEMBL;Acc:Q22835]
WBGene00008147	C47E12.2	1455.97	-0.88377	0.313823	-2.81614	0.00486048	0.0635989
WBGene00017733	ubxn-1	4848.9	-0.692863	0.246097	-2.81541	0.00487149	0.0636694	UBX-containing protein in Nematodes [Source:UniProtKB/TrEMBL;Acc:Q9TXH9]
WBGene00019208	lips-14	148.832	-1.22124	0.433782	-2.81533	0.0048727	0.0636694
WBGene00013251	Y57A10A.6	100.995	-1.12124	0.39863	-2.81274	0.00491213	0.0641397
WBGene00007732	spe-44	364.896	-1.02194	0.363579	-2.81077	0.00494229	0.0643083
WBGene00010515	K02E11.6	228.076	0.871209	0.309931	2.81098	0.00493912	0.0643083
WBGene00017600	ttr-10	167.519	0.887392	0.31571	2.81078	0.00494212	0.0643083	TransThyretin-Related family domain [Source:UniProtKB/TrEMBL;Acc:O01517]
WBGene00017712	F22E5.17	842.805	-1.12014	0.398463	-2.81114	0.0049366	0.0643083
WBGene00019483	K07D4.2	6.23318	-2.66033	0.946295	-2.81131	0.00493395	0.0643083
WBGene00003390	mog-2	3392.31	0.471817	0.167939	2.80946	0.0049625	0.0644124	Probable U2 small nuclear ribonucleoprotein A' [Source:UniProtKB/Swiss-Prot;Acc:Q9BLB6]
WBGene00008791	F14D7.4	13.4801	-1.57504	0.560642	-2.80935	0.0049641	0.0644124
WBGene00021456	Y39F10B.1	3049.02	-0.766232	0.272698	-2.80982	0.00495692	0.0644124
WBGene00044452	Y102E9.5	146.636	0.68584	0.2441	2.80966	0.00495936	0.0644124
WBGene00000958	dgk-1	263.106	0.821951	0.292604	2.80908	0.00496826	0.0644215	Diacylglycerol kinase [Source:UniProtKB/TrEMBL;Acc:Q7JNZ1]
WBGene00013348	fbxa-106	216.889	-0.803743	0.286232	-2.80801	0.00498488	0.0645024	F-box A protein [Source:UniProtKB/TrEMBL;Acc:L8E967]
WBGene00018234	F40E12.1	3.46494	-2.94454	1.04851	-2.80831	0.00498028	0.0645024
WBGene00044413	B0205.12	213.988	-1.85362	0.660075	-2.80819	0.00498209	0.0645024
WBGene00003884	osm-3	125.337	-0.791652	0.282031	-2.80696	0.0050011	0.0646547	Osmotic avoidance abnormal protein 3 [Source:UniProtKB/Swiss-Prot;Acc:P46873]
WBGene00011053	arrd-12	10.6239	-2.18517	0.778566	-2.80667	0.0050057	0.0646547	ARRestin Domain protein [Source:UniProtKB/TrEMBL;Acc:A0A131MCQ1]
WBGene00013375	srsx-25	31.3535	-1.08226	0.385616	-2.80658	0.00500704	0.0646547	Serpentine Receptor, class SX [Source:UniProtKB/TrEMBL;Acc:Q9U1X1]
WBGene00206418	M04C3.5	32.3125	-1.26422	0.450501	-2.80625	0.00501221	0.0646765
WBGene00008330	C55A6.1	2465.43	-0.796092	0.283718	-2.80593	0.00501717	0.0646958
WBGene00010514	K02E11.5	170.203	0.980191	0.349459	2.80488	0.00503347	0.0648454
WBGene00016829	sre-54	76.489	-2.28334	0.8141	-2.80474	0.00503573	0.0648454	Serpentine Receptor, class E (Epsilon) [Source:UniProtKB/TrEMBL;Acc:A3QMA4]
WBGene00002180	jtr-1	1530.57	-1.11346	0.397033	-2.80444	0.00504036	0.0648603	JTB gene Related [Source:UniProtKB/TrEMBL;Acc:Q9N4B5]
WBGene00018823	F54E2.1	7836.94	0.722197	0.257589	2.80369	0.00505222	0.0649233
WBGene00220172	Y49E10.36	27.9745	-1.74718	0.623153	-2.80377	0.00505087	0.0649233
WBGene00044141	H03G16.6	8.85669	-2.33024	0.831521	-2.80238	0.00507269	0.0651414
WBGene00006984	zig-7	971.521	0.715141	0.255246	2.80178	0.00508222	0.0652189	Zwei Ig domain protein zig-7 [Source:UniProtKB/Swiss-Prot;Acc:O44730]
WBGene00013638	Y105C5A.14	154.26	-1.06842	0.381472	-2.80078	0.00509794	0.0653757
WBGene00016159	C27A12.9	854.426	-0.777406	0.277592	-2.80054	0.00510178	0.0653799
WBGene00000831	ctl-2	2233.01	0.879088	0.31402	2.79947	0.0051187	0.0654662	Peroxisomal catalase 1 [Source:UniProtKB/Swiss-Prot;Acc:Q27487]
WBGene00012385	Y5F2A.4	951.733	-1.42025	0.507261	-2.79984	0.00511279	0.0654662
WBGene00015547	ain-1	6113.11	0.543729	0.194228	2.79945	0.00511904	0.0654662	ALG-1 INteracting protein [Source:UniProtKB/TrEMBL;Acc:Q17740]
WBGene00009243	F29C6.1	439.359	0.775884	0.277215	2.79885	0.00512845	0.0655416
WBGene00000609	col-20	5157.86	-1.2264	0.438288	-2.79816	0.00513943	0.0656368	COLlagen [Source:UniProtKB/TrEMBL;Acc:P91249]
WBGene00010745	dod-17	594.745	1.03625	0.370526	2.7967	0.00516273	0.0658893	Downstream Of DAF-16 (Regulated by DAF-16) [Source:UniProtKB/TrEMBL;Acc:O45667]
WBGene00013507	Y71A12B.10	19.57	-1.32473	0.473836	-2.79576	0.00517783	0.0660368
WBGene00007336	C05C12.4	1203.19	0.881977	0.315558	2.79498	0.00519031	0.0661507
WBGene00008956	nekl-3	389.64	0.771199	0.276047	2.79372	0.00521055	0.0663633	Serine/threonine-protein kinase nekl-3 [Source:UniProtKB/Swiss-Prot;Acc:G5EFM9]
WBGene00016591	C42C1.13	621.505	-0.613704	0.219704	-2.79332	0.00521695	0.0663994	Protein-lysine methyltransferase C42C1.13 [Source:UniProtKB/Swiss-Prot;Acc:A7IQW5]
WBGene00235272	Y43B11AL.5	83.7408	-1.06864	0.382605	-2.79305	0.00522133	0.0664098
WBGene00008609	F09B12.5	13.4079	-2.01504	0.721641	-2.79231	0.00523331	0.0664726
WBGene00019827	mop-25.1	2603.35	0.506447	0.181372	2.79231	0.00523339	0.0664726	MO25 (MOuse embryo scaffolding Protein) homolog [Source:UniProtKB/TrEMBL;Acc:Q7Z2A5]
WBGene00000737	col-164	51.301	-3.35397	1.20191	-2.79052	0.00526233	0.0666981	COLlagen [Source:UniProtKB/TrEMBL;Acc:Q22651]
WBGene00004078	pos-1	17580.3	-1.07164	0.384013	-2.79063	0.00526063	0.0666981	Cytoplasmic zinc-finger protein; POsterior Segregation [Source:UniProtKB/TrEMBL;Acc:G5EF15]
WBGene00011207	R10E8.1	107.743	-0.955882	0.34258	-2.79025	0.00526674	0.0666981
WBGene00016456	C35E7.4	356.416	0.86047	0.3084	2.7901	0.0052691	0.0666981
WBGene00016714	C46F2.1	273.76	0.968152	0.347022	2.78989	0.00527261	0.0666981
WBGene00020631	T20F7.3	50.2169	0.912286	0.326895	2.79076	0.00525841	0.0666981	Kinase [Source:UniProtKB/TrEMBL;Acc:O02167]
WBGene00077765	T20F10.8	9.55814	-2.01554	0.722642	-2.78912	0.00528512	0.0667658
WBGene00219859	C49F5.11	27.9836	-2.57619	0.923623	-2.78922	0.00528345	0.0667658	NA
WBGene00000940	dcs-1	2060.48	-0.451944	0.162082	-2.78837	0.00529741	0.0668757	m7GpppX diphosphatase [Source:UniProtKB/Swiss-Prot;Acc:G5EFS4]
WBGene00004949	sox-2	663.044	0.704064	0.252612	2.78714	0.0053175	0.067084	Transcription factor sox-2 [Source:UniProtKB/Swiss-Prot;Acc:Q21305]
WBGene00008234	C50F4.9	200.303	0.676653	0.24281	2.78676	0.00532373	0.0671171
WBGene00015540	sams-4	1621.12	-0.544776	0.195521	-2.78627	0.0053318	0.0671735	Probable S-adenosylmethionine synthase 4 [Source:UniProtKB/Swiss-Prot;Acc:P50306]
WBGene00000035	ace-1	295.721	0.909693	0.326697	2.78452	0.00536075	0.0674926	Acetylcholinesterase 1 [Source:UniProtKB/Swiss-Prot;Acc:P38433]
WBGene00020507	vha-15	5699.14	0.442671	0.159066	2.78293	0.00538697	0.0676856	Probable V-type proton ATPase subunit H 2 [Source:UniProtKB/Swiss-Prot;Acc:Q22494]
WBGene00021019	W04B5.2	60.2003	-0.855213	0.307264	-2.78332	0.00538061	0.0676856
WBGene00022128	Y71F9B.6	809.043	-0.832256	0.299055	-2.78295	0.00538669	0.0676856
WBGene00007458	ule-4	27125.7	0.814253	0.292677	2.78209	0.00540103	0.0678165	UPF0375 protein ule-4 [Source:UniProtKB/Swiss-Prot;Acc:O62053]
WBGene00010579	K05C4.2	5582.48	-1.43141	0.514625	-2.78147	0.0054114	0.0678742	Protein jagunal homolog [Source:UniProtKB/Swiss-Prot;Acc:Q9XUU9]
WBGene00219546	F41E7.20	39.0699	-2.36597	0.850647	-2.78138	0.0054129	0.0678742
WBGene00019796	M151.4	29.8181	-1.40154	0.504045	-2.78059	0.00542609	0.0679939
WBGene00010705	cyp-14A1	47.0553	0.962441	0.346355	2.77877	0.00545652	0.0683292	CYtochrome P450 family [Source:UniProtKB/TrEMBL;Acc:Q27506]
WBGene00005005	spp-20	155.819	-2.37856	0.856212	-2.778	0.00546943	0.0683532	SaPosin-like Protein family [Source:UniProtKB/TrEMBL;Acc:Q94255]
WBGene00011828	nepr-1	2503.11	-0.978789	0.352297	-2.77831	0.00546432	0.0683532	Nuclear envelope phosphatase-regulatory subunit 1 homolog [Source:UniProtKB/Swiss-Prot;Acc:Q9XXN3]
WBGene00020448	fbxa-51	174.384	1.02731	0.369787	2.77811	0.00546754	0.0683532	F-box A protein [Source:UniProtKB/TrEMBL;Acc:Q9TZ19]
WBGene00000659	col-84	409.529	-3.54075	1.27478	-2.77753	0.00547741	0.0684071	COLlagen [Source:UniProtKB/TrEMBL;Acc:Q21437]
WBGene00000789	cpz-2	4802	0.793413	0.285787	2.77624	0.00549908	0.0684963	CathePsin Z [Source:UniProtKB/TrEMBL;Acc:P92005]
WBGene00021664	Y48G1BL.5	133.916	-1.56157	0.562423	-2.7765	0.00549472	0.0684963
WBGene00022233	ipla-6	1536.7	-0.870709	0.313589	-2.77659	0.00549319	0.0684963	Intracelllar PhosphoLipase A family [Source:UniProtKB/TrEMBL;Acc:Q8MXR3]
WBGene00044220	Y102A5C.35	10.6635	-1.52345	0.548745	-2.77623	0.00549925	0.0684963
WBGene00020504	svh-2	2206.36	0.626859	0.225906	2.77487	0.00552239	0.0687386	Tyrosine-protein kinase receptor svh-2 [Source:UniProtKB/Swiss-Prot;Acc:H2KZU7]
WBGene00000697	col-123	112.757	-4.0927	1.47541	-2.77393	0.00553833	0.0687535	COLlagen [Source:UniProtKB/TrEMBL;Acc:Q23222]
WBGene00010892	dhhc-6	2457.28	-0.760997	0.274333	-2.77399	0.00553733	0.0687535	Palmitoyltransferase [Source:UniProtKB/TrEMBL;Acc:G5EFD8]
WBGene00015526	C06E1.11	61.7132	-1.03686	0.373747	-2.77423	0.00553317	0.0687535
WBGene00044483	H06H21.11	957.333	-0.650183	0.234343	-2.7745	0.00552875	0.0687535
WBGene00008229	C50F4.1	2015.24	0.94848	0.342041	2.773	0.00555415	0.0688124
WBGene00012176	W01C9.2	71.6819	-2.04516	0.737484	-2.77315	0.00555158	0.0688124
WBGene00023259	C52D10.10	8.41047	-2.42688	0.875079	-2.77333	0.00554858	0.0688124
WBGene00007692	C23H4.3	448.79	0.910086	0.32835	2.7717	0.00557652	0.0689521
WBGene00009449	F35H8.4	30.3618	-1.55387	0.560562	-2.77198	0.00557166	0.0689521
WBGene00016210	C29F5.1	1244.43	0.615733	0.222134	2.7719	0.00557297	0.0689521
WBGene00010636	K07F5.8	21.9576	-2.27023	0.819604	-2.76991	0.00560715	0.0692849	Protein-tyrosine-phosphatase [Source:UniProtKB/TrEMBL;Acc:Q21297]
WBGene00002107	ins-24	147.053	-1.50597	0.543976	-2.76845	0.00563239	0.0695507	INSulin related [Source:UniProtKB/TrEMBL;Acc:Q9U1P6]
WBGene00020540	pals-25	159.726	-0.835078	0.301713	-2.76779	0.00564386	0.0696462	Protein containing ALS2cr12 (ALS2CR12) domain [Source:UniProtKB/TrEMBL;Acc:Q3V5H4]
WBGene00008679	F11A5.13	11.0692	-1.84896	0.668089	-2.76754	0.00564814	0.0696529
WBGene00005089	srd-11	5.91949	-2.48814	0.899265	-2.76686	0.0056599	0.0696598	Serpentine Receptor, class D (Delta) [Source:UniProtKB/TrEMBL;Acc:Q20721]
WBGene00008311	rskn-2	1772.75	0.669772	0.242059	2.76698	0.00565779	0.0696598	Putative ribosomal protein S6 kinase alpha-2 [Source:UniProtKB/Swiss-Prot;Acc:Q18846]
WBGene00017631	F20B6.7	20.861	-1.88777	0.682222	-2.76709	0.00565585	0.0696598
WBGene00018070	F35H10.5	348.538	-1.54008	0.556728	-2.7663	0.00566958	0.0696868
WBGene00050878	Y71A12C.3	3.2786	-3.60868	1.30445	-2.76644	0.00566712	0.0696868
WBGene00022366	Y92H12BL.5	373.515	-1.04151	0.376534	-2.76605	0.00567391	0.0696941
WBGene00004489	rps-20	32780.4	-1.56561	0.56606	-2.7658	0.00567839	0.0697032	Ribosomal Protein, Small subunit [Source:UniProtKB/TrEMBL;Acc:Q8WQA8]
WBGene00012024	clec-29	6.78566	-2.00316	0.724636	-2.76437	0.00570329	0.0699309	C-type LECtin [Source:UniProtKB/TrEMBL;Acc:O45823]
WBGene00016407	C34D10.2	2427.32	0.617513	0.223388	2.7643	0.00570444	0.0699309
WBGene00050945	C45B11.7	41.7466	-1.52066	0.550159	-2.76404	0.00570902	0.0699412
WBGene00012570	Y37H2A.10	13.403	-1.74549	0.631571	-2.76373	0.00571446	0.0699618
WBGene00014134	ZK896.3	101.028	-1.05611	0.3823	-2.76253	0.00573554	0.0701738
WBGene00011353	T01H8.2	415.585	0.557959	0.202014	2.76198	0.00574515	0.0702453
WBGene00005555	sri-43	45.2826	-1.65767	0.600306	-2.76138	0.00575583	0.0703298	Serpentine Receptor, class I [Source:UniProtKB/TrEMBL;Acc:Q9TZE8]
WBGene00014138	clec-186	3152.83	0.729896	0.264409	2.76048	0.00577162	0.0704765	C-type LECtin [Source:UniProtKB/TrEMBL;Acc:O02343]
WBGene00007702	C24H11.5	491.918	-1.24445	0.450921	-2.75979	0.0057839	0.0705454
WBGene00008364	slc-25A26	928.16	-0.515057	0.186647	-2.75952	0.00578862	0.0705454	SLC (SoLute Carrier) homolog [Source:UniProtKB/TrEMBL;Acc:Q18934]
WBGene00206356	T08B2.15	9.39257	-2.13636	0.774159	-2.75958	0.00578751	0.0705454
WBGene00194851	K07C10.3	9.52114	-2.12358	0.769636	-2.7592	0.0057943	0.0705686
WBGene00003417	mrt-2	795.25	-0.673762	0.244219	-2.75885	0.00580055	0.0705986	MoRTal germline; Rad1-like protein [Source:UniProtKB/TrEMBL;Acc:G5EC44]
WBGene00044161	C47G2.8	12.1098	-1.68516	0.610904	-2.75846	0.0058074	0.0706359
WBGene00014759	F46A8.1	16.6816	-2.025	0.734952	-2.75528	0.00586425	0.0712809
WBGene00010744	K10D6.4	537.604	0.634398	0.230401	2.75346	0.00589698	0.0716098
WBGene00045316	C49F5.9	43.4454	-1.70568	0.619492	-2.75334	0.00589899	0.0716098
WBGene00017071	aagr-1	3082.32	0.731111	0.265621	2.75246	0.00591493	0.0717565	Acid Alpha Glucosidase Relate [Source:UniProtKB/TrEMBL;Acc:Q19004]
WBGene00007390	lmtr-3	2072.95	-0.835463	0.303615	-2.75172	0.00592839	0.0717655	Late endosomal/lysosomal adaptor, Mapk (MAPK) and mToR (MTOR) activator homolog [Source:UniProtKB/TrEMBL;Acc:N1NTE7]
WBGene00007716	fbxa-82	75.1113	0.740644	0.26917	2.75158	0.00593078	0.0717655	F-box A protein [Source:UniProtKB/TrEMBL;Acc:B5U8N5]
WBGene00011378	T02E1.6	36.6383	-3.44176	1.25058	-2.75213	0.00592082	0.0717655
WBGene00044632	Y73F8A.37	12.0676	-1.6326	0.593336	-2.75157	0.00593106	0.0717655
WBGene00010513	K02E11.4	214.131	0.996473	0.362416	2.74953	0.00596812	0.072167
WBGene00011684	T10B10.8	273.284	0.709856	0.258234	2.74889	0.00597981	0.0722615
WBGene00010059	F54E4.3	404.906	0.838068	0.304969	2.74804	0.00599528	0.0724015
WBGene00013740	hut-1	2348.21	-0.520766	0.189544	-2.74747	0.00600573	0.0724808	Yeast Homolog UDP-Gal Transporter [Source:UniProtKB/TrEMBL;Acc:V6CLL6]
WBGene00195065	F20G2.9	3.93894	-2.99317	1.08955	-2.74716	0.00601137	0.0725019
WBGene00164985	ZK1010.10	104.625	-1.0335	0.376295	-2.74653	0.00602299	0.0725952
WBGene00013306	Y57G11C.8	176.345	-0.757101	0.27571	-2.746	0.0060326	0.072664
WBGene00194748	F56F3.7	16.8882	-2.92875	1.0667	-2.74562	0.00603961	0.0727015
WBGene00013269	Y57A10A.29	1068.46	-0.830307	0.302607	-2.74385	0.00607232	0.073048	Succinate dehydrogenase assembly factor 2, mitochondrial [Source:UniProtKB/Swiss-Prot;Acc:Q9NA72]
WBGene00002256	lbp-4	1806.75	0.503037	0.183363	2.74339	0.00608089	0.0730623	Fatty acid-binding protein homolog 4 [Source:UniProtKB/Swiss-Prot;Acc:Q23092]
WBGene00004239	puf-3	10301	-1.02425	0.373384	-2.74315	0.00608526	0.0730623	PUF (Pumilio/FBF) domain-containing [Source:UniProtKB/TrEMBL;Acc:Q9U2G4]
WBGene00007640	C17D12.7	1179.45	-0.746261	0.272044	-2.74316	0.00608509	0.0730623
WBGene00020884	T28B4.1	356.562	0.76174	0.27774	2.74263	0.00609485	0.0731304
WBGene00008693	F11C1.4	32.589	-1.15257	0.420282	-2.74237	0.00609974	0.0731419
WBGene00003694	nhr-104	248.376	0.630258	0.229881	2.74167	0.00611269	0.073203	Nuclear Hormone Receptor family; Nuclear receptor NHR-104 [Source:UniProtKB/TrEMBL;Acc:Q86PJ5]
WBGene00018869	rfip-1	1625.25	0.717801	0.261793	2.74186	0.00610919	0.073203	Rab-11 Family Interacting-Protein [Source:UniProtKB/TrEMBL;Acc:Q95ZS6]
WBGene00006599	tpa-1	1234.56	0.490421	0.17895	2.74054	0.00613377	0.0733614	Protein kinase C-like 1 [Source:UniProtKB/Swiss-Prot;Acc:P34722]
WBGene00013098	Y51H4A.1	56.7927	-1.27786	0.466277	-2.74056	0.00613347	0.0733614
WBGene00235277	T04C4.3	5.75719	-3.95432	1.44387	-2.7387	0.00616828	0.0737268
WBGene00010240	gadr-1	13.8676	-1.71796	0.627415	-2.73815	0.0061785	0.0737543
WBGene00021397	Y38C1AA.6	126.939	0.88261	0.322323	2.73828	0.00617616	0.0737543
WBGene00219374	C25A11.10	256.537	-0.985788	0.360071	-2.73776	0.006186	0.0737966
WBGene00007304	ttr-39	157.816	0.860169	0.314337	2.73646	0.00621048	0.0740414	TransThyretin-Related family domain [Source:UniProtKB/TrEMBL;Acc:H2L2B1]
WBGene00011721	T11G6.7	4.48669	-4.38561	1.60282	-2.73618	0.00621572	0.0740564
WBGene00008111	C46C2.3	27.0288	-1.14527	0.418649	-2.73563	0.00622618	0.0741159
WBGene00011002	nhr-205	40.6839	0.988243	0.361267	2.73549	0.00622866	0.0741159	Nuclear Hormone Receptor family [Source:UniProtKB/TrEMBL;Acc:Q21700]
WBGene00007860	rilp-1	1356.08	-1.29305	0.472738	-2.73524	0.00623347	0.0741259	RILP (Rab7-Interacting Lysosomal Protein) homolog [Source:UniProtKB/TrEMBL;Acc:G5EDL7]
WBGene00010340	slcf-1	251.247	1.03173	0.377286	2.73461	0.0062455	0.0741742	SoLute Carrier Family [Source:UniProtKB/TrEMBL;Acc:G5ECR3]
WBGene00017121	cyc-2.1	16370	-1.48409	0.542684	-2.73473	0.00624316	0.0741742	Cytochrome c 2.1 [Source:UniProtKB/Swiss-Prot;Acc:P19974]
WBGene00007320	C05B5.2	66.8554	-2.8178	1.03054	-2.7343	0.00625124	0.0741952
WBGene00007452	C08F11.3	162.78	0.877634	0.321102	2.7332	0.00627231	0.0743979
WBGene00009403	F35C11.4	209.016	0.745854	0.272909	2.73298	0.00627645	0.0743997
WBGene00012621	Y38H6C.8	19.0998	-1.80883	0.662173	-2.73167	0.00630151	0.0745836
WBGene00016400	C34D4.4	2609.54	-0.486259	0.178016	-2.73154	0.00630397	0.0745836	Uncharacterized Golgi apparatus membrane protein-like protein C34D4.4 [Source:UniProtKB/Swiss-Prot;Acc:Q18449]
WBGene00022333	fbxa-27	74.5275	0.858935	0.314423	2.73178	0.0062993	0.0745836	F-box A protein [Source:UniProtKB/TrEMBL;Acc:Q95XB5]
WBGene00010369	chd-1	1118.14	-1.13401	0.415242	-2.73097	0.00631485	0.0746177	Chromodomain and Helicase Domain protein [Source:UniProtKB/TrEMBL;Acc:O17909]
WBGene00235356	Y67D8A.10	459.103	-0.629468	0.230491	-2.73099	0.00631442	0.0746177
WBGene00020479	T13C2.3	257.459	0.790834	0.289743	2.72943	0.00634432	0.0749184
WBGene00000688	col-114	96.946	-3.62213	1.32818	-2.72713	0.00638888	0.075254	COLlagen [Source:UniProtKB/TrEMBL;Acc:Q18975]
WBGene00001330	eps-8	2742.25	0.663674	0.243333	2.72744	0.00638288	0.075254	EPS (Human endocytosis) related; Epidermal growth factor receptor pathway substrate 8 splice variant A [Source:UniProtKB/TrEMBL;Acc:G5ED33]
WBGene00010337	F59F4.2	3371.53	-1.2591	0.461677	-2.72723	0.00638689	0.075254
WBGene00020349	T08B2.11	198.855	-1.60729	0.589261	-2.72763	0.00637907	0.075254
WBGene00000375	cyp-44A1	909.314	-0.784679	0.287786	-2.7266	0.00639896	0.0753251	Probable cytochrome P450 CYP44 [Source:UniProtKB/Swiss-Prot;Acc:Q09660]
WBGene00195209	C07B5.8	26.7651	-1.95522	0.717308	-2.72577	0.00641509	0.0754674
WBGene00235106	F08H9.15	6.74475	-4.02654	1.47864	-2.72313	0.00646663	0.0760257
WBGene00002186	kel-10	100.327	-2.61733	0.961237	-2.72288	0.00647156	0.0760358	Kelch repeat-containing protein kel-10 [Source:UniProtKB/Swiss-Prot;Acc:P34569]
WBGene00044639	C24H12.12	7.91596	-2.84889	1.04638	-2.72262	0.00647669	0.076048
WBGene00009223	mdt-28	2154.8	-0.793071	0.291416	-2.72144	0.00649979	0.0762234	MeDiaTor [Source:UniProtKB/TrEMBL;Acc:H9G301]
WBGene00017931	picc-1	2389.92	-1.35736	0.498756	-2.72149	0.00649888	0.0762234	PAC-1 interacting and coiled-coil domain-containing protein 1 [Source:UniProtKB/Swiss-Prot;Acc:H2KYP0]
WBGene00050904	Y70C5A.3	97.3948	0.964638	0.354493	2.72118	0.006505	0.0762365
WBGene00050910	Y43F8B.17	3.49445	-3.96181	1.45606	-2.72091	0.00651017	0.0762491
WBGene00001032	dnj-14	2152.31	0.448169	0.16475	2.72029	0.00652237	0.0762981	DNaJ domain (Prokaryotic heat shock protein) [Source:UniProtKB/TrEMBL;Acc:Q21162]
WBGene00043998	T21C12.8	182.51	-0.8826	0.324451	-2.72029	0.00652253	0.0762981
WBGene00001977	hmg-12	13395.8	-0.940383	0.345762	-2.71974	0.00653335	0.0763767	HMG; High mobility group protein I beta [Source:UniProtKB/TrEMBL;Acc:G5EDQ2]
WBGene00021834	mab-31	1490.75	0.598629	0.220196	2.71862	0.00655546	0.0765425
WBGene00022454	Y110A7A.2	19.735	-1.62395	0.597348	-2.71861	0.00655574	0.0765425
WBGene00003510	mxl-2	2002.62	-0.965953	0.35535	-2.71831	0.0065616	0.076563	MaX-Like [Source:UniProtKB/TrEMBL;Acc:Q9TZ70]
WBGene00014253	ZK1320.3	10777.9	0.702896	0.2586	2.71808	0.00656616	0.0765683
WBGene00007017	mdt-17	4183.02	-0.900318	0.331358	-2.71705	0.00658661	0.0767587	Mediator of RNA polymerase II transcription subunit 17 [Source:UniProtKB/Swiss-Prot;Acc:Q9NAL4]
WBGene00044521	Y5H2A.4	8.3551	-2.17625	0.801327	-2.71581	0.00661142	0.0769997
WBGene00003007	lin-18	478.424	0.529561	0.195038	2.71517	0.00662427	0.0770356	Inactive tyrosine-protein kinase RYK [Source:UniProtKB/Swiss-Prot;Acc:G5EGT9]
WBGene00010516	K02E11.7	87.9556	1.05999	0.390372	2.71534	0.00662087	0.0770356
WBGene00199670	C10G11.14	2.89561	-3.83481	1.41243	-2.71503	0.0066269	0.0770356	NA
WBGene00017890	F28B4.1	5.09457	-2.48484	0.915348	-2.71464	0.00663475	0.0770789
WBGene00009390	F35C5.1	38.8681	-1.9294	0.710952	-2.71383	0.00665101	0.0771716
WBGene00045484	F34D10.9	67.3883	-0.982068	0.361855	-2.71398	0.00664797	0.0771716
WBGene00015976	C18E3.9	829.816	-1.14811	0.423096	-2.71359	0.00665578	0.0771789
WBGene00002072	ima-1	2262.39	-1.40416	0.518035	-2.71056	0.00671701	0.0777524	Importin subunit alpha-1 [Source:UniProtKB/Swiss-Prot;Acc:Q22560]
WBGene00023477	nspc-1	104.698	0.906226	0.334336	2.71052	0.00671775	0.0777524	Nematode Specific Peptide family, group C [Source:UniProtKB/TrEMBL;Acc:Q65ZI6]
WBGene00219641	linc-47	23.8599	-2.38314	0.879169	-2.71067	0.00671468	0.0777524	NA
WBGene00003705	nhr-115	132.155	0.691193	0.255055	2.70998	0.00672867	0.0778305	Nuclear hormone receptor family member nhr-115 [Source:UniProtKB/Swiss-Prot;Acc:O16662]
WBGene00005586	sri-74	43.252	-1.4167	0.522879	-2.70942	0.00674	0.0779024	Serpentine Receptor, class I [Source:UniProtKB/TrEMBL;Acc:O44840]
WBGene00016166	C27F2.4	2039.11	0.442294	0.163252	2.70927	0.00674324	0.0779024
WBGene00001045	dnj-27	2054.17	0.530344	0.195823	2.70829	0.00676316	0.0779931	DNaJ domain (Prokaryotic heat shock protein) [Source:UniProtKB/TrEMBL;Acc:Q25AR9]
WBGene00019142	btb-4	198.264	-1.06138	0.391856	-2.70861	0.00675662	0.0779931	BTB (Broad/complex/Tramtrack/Bric a brac) domain protein [Source:UniProtKB/TrEMBL;Acc:Q9N5P7]
WBGene00044726	Y53F4B.43	6.89855	-2.22153	0.820279	-2.70826	0.00676364	0.0779931
WBGene00006987	zmp-1	252.474	-1.55636	0.574727	-2.70801	0.0067689	0.0780055	Matrix metalloproteinase-A [Source:UniProtKB/Swiss-Prot;Acc:G5EGM1]
WBGene00002221	klp-10	507.056	-1.24267	0.458983	-2.70744	0.00678035	0.0780893
WBGene00004796	sid-2	953.367	0.724382	0.267642	2.70653	0.00679909	0.0782084	Systemic RNA interference defective protein 2 [Source:UniProtKB/Swiss-Prot;Acc:G5EEV9]
WBGene00020195	T03G6.3	795.959	0.721736	0.266646	2.70672	0.00679523	0.0782084
WBGene00006723	ubh-3	2844	0.50479	0.186578	2.70552	0.00681983	0.0783987	Ubiquitin carboxyl-terminal hydrolase [Source:UniProtKB/TrEMBL;Acc:Q965V9]
WBGene00006531	tba-5	44.7655	0.98481	0.3642	2.70403	0.00685037	0.078607	Tubulin alpha chain [Source:UniProtKB/TrEMBL;Acc:Q19490]
WBGene00019466	tos-1	4959.77	-1.01257	0.374426	-2.70432	0.00684439	0.078607	Target Of Splicing [Source:UniProtKB/TrEMBL;Acc:Q95R01]
WBGene00044696	F52E1.14	11789.8	0.598521	0.221345	2.70402	0.00685061	0.078607
WBGene00020711	rmd-5	13.1667	-1.74116	0.644091	-2.70328	0.00686585	0.0787334
WBGene00001631	gly-6	753.701	-0.63159	0.233771	-2.70175	0.00689754	0.0790209	Probable N-acetylgalactosaminyltransferase 6 [Source:UniProtKB/Swiss-Prot;Acc:O61394]
WBGene00021089	W08E12.8	78.2538	-1.82388	0.675097	-2.70166	0.00689939	0.0790209
WBGene00012276	his-74	5441.26	-0.833926	0.308695	-2.70145	0.0069037	0.0790217	Histone H3.3-like type 2 [Source:UniProtKB/Swiss-Prot;Acc:Q27532]
WBGene00021273	Y23H5B.2	15.344	-1.89511	0.70162	-2.70105	0.00691213	0.0790696
WBGene00021682	Y48G1C.9	827.336	-0.950614	0.351974	-2.70081	0.00691716	0.0790787
WBGene00002090	ins-7	156.466	0.779282	0.288789	2.69845	0.00696628	0.0795427	Probable insulin-like peptide beta-type 4 [Source:UniProtKB/Swiss-Prot;Acc:Q23430]
[truncated: 44,938 more rows]
