# Supplementary material for: The ribosomal RNA m5C methyltransferase NSUN-1 modulates healthspan and oogenesis in Caenorhabditis elegans
Source: eLife. 2020 Dec 8;9:e56205. doi: 10.7554/eLife.56205 (PMC7746234; doi:10.7554/eLife.56205)
Supplement: Source data 3. — xlsx-file containing the results of the enrichment analysis of 3’ UTR motifs recognized by RNA-binding proteins. Differentially enriched motifs are indicated in green. [file elife-56205-data3.xlsx]

## Sheet: 3'UTR_motifs_enrichment
	RNAi control promoted	RNAi control repressed	nsun-1 RNAi promoted	nsun-1 RNAi repressed
tiar-3 (M005_0.6)	8.02378e-11	1.08434e-27	8.00054e-31	1.93111e-32
exc-7 (M014_0.6)	0.892802	0.695351	1.74698e-06	0.704383
fox-1 (M017_0.6)	0.546839	0.0141029	0.805335	0.000224966
mex-5/6 (M038_0.6)	0.00239615	0.821736	0.0140098	0.000716335
msi-1 (M040_0.6)	1	1	1	1
asd-2 (M046_0.6)	0.913877	0.373487	0.00020767	8.52101e-09
unc-75 (M079_0.6)	0.684358	1.98503e-15	0.0100704	4.6095e-08
cey-1 (M081_0.6)	0.0120619	0.00316643	0.2157	0.275331
cey-1 (M082_0.6)	0.247034	0.999999	0.999999	1
rsp-3 (M102_0.6)	1	1	1	1
rsp-3 (M103_0.6)	1	1	1	1
rsp-3 (M104_0.6)	1	1	1	1
rsp-3 (M105_0.6)	1	1	1	1
rsp-3 (M106_0.6)	0.999997	0.999973	1	0.998516
cey-1 (M111_0.6)	0.0230142	5.96389e-06	0.0312439	0.00012373
asd-2/gld-1 (M113_0.6)	0.918715	0.645551	0.000531915	1.18633e-06
mex-3 (M122_0.6)	1	1	1	1
pab-1 (M130_0.6)	1	1	1	1
tag-262 (M142_0.6)	0.999905	0.571107	0.387	0.333301
pabp-2 (M148_0.6)	1	1	1	1
rsp-3 (M154_0.6)	1	1	1	1
msi-1 (M167_0.6)	1	1	1	1
sup-12 (M170_0.6)	0.580996	1	0.946055	0.988621
asd-1 (M171_0.6)	0.591598	0.0208078	0.850054	0.000406449
mec-8 (M172_0.6)	0.0165904	0.207427	0.997324	0.0209324
tag-310 (M173_0.6)	4.00303e-05	0.131983	0.000244164	0.121255
etr-1 (M174_0.6)	0.0151507	1	0.00628898	0.997789
tiar-1/2 (M219_0.6)	1.13053e-10	4.97312e-24	2.3014e-29	4.76538e-31
eif2-alpha (M231_0.6)	0.616299	0.0360382	0.947713	0.00372052
tag-262 (M237_0.6)	0.999655	0.311841	0.75735	0.495636
cey-1 (M250_0.6)	0.994627	1	0.999895	1
cey-1 (M254_0.6)	0.995706	1	0.992031	1
cey-1 (M260_0.6)	0.985783	0.358104	0.844179	0.54818
sap-49 (M261_0.6)	0.581515	1	0.964564	0.992696
asd-2 (M262_0.6)	0.126818	0.631379	0.512959	1.64133e-05
rsp-3 (M270_0.6)	0.546839	0.0141029	0.805335	0.000224966
rsp-3 (M272_0.6)	1	1	1	1
rsp-3 (M273_0.6)	0.996249	0.809331	1	0.00235219
asd-2 (M281_0.6)	0.970751	1	0.944788	1
rsp-3 (M351_0.6)	0.999997	0.997542	1	0.99956
