# Supplementary material for: The ribosomal RNA m5C methyltransferase NSUN-1 modulates healthspan and oogenesis in Caenorhabditis elegans
Source: eLife. 2020 Dec 8;9:e56205. doi: 10.7554/eLife.56205 (PMC7746234; doi:10.7554/eLife.56205)
Supplement: Source data 4. — xlsx-file containing the results of the Gene Ontology (GO) enrichment analysis. Individual sheets represent enriched GO-terms (BP: biological process, MF: molecular function, CC: cellular component) in up- or downregulated genes in RNAi control or nsun-1 RNAi-treated animals. [file elife-56205-data4.xlsx]

## Sheet: BP_control_up
Category	Term	Count	X.	PValue	Genes	List.Total	Pop.Hits	Pop.Total	Fold.Enrichment	Bonferroni	Benjamini	FDR
GOTERM_BP_FAT	GO:0045087~innate immune response	11	7.00637	8.95032e-06	WBGENE00008234, WBGENE00008336, WBGENE00019645, WBGENE00043062, WBGENE00010019, WBGENE00004986, WBGENE00017041, WBGENE00009393, WBGENE00010745, WBGENE00010659, WBGENE00044457	60	312	10368	6.09231	0.00460774	0.00460774	0.0129451
GOTERM_BP_FAT	GO:0006955~immune response	11	7.00637	1.11737e-05	WBGENE00008234, WBGENE00008336, WBGENE00019645, WBGENE00043062, WBGENE00010019, WBGENE00004986, WBGENE00017041, WBGENE00009393, WBGENE00010745, WBGENE00010659, WBGENE00044457	60	320	10368	5.94	0.00574905	0.00287867	0.0161606

## Sheet: MF_control_up
Category	Term	Count	X.	PValue	Genes	List.Total	Pop.Hits	Pop.Total	Fold.Enrichment	Bonferroni	Benjamini	FDR
none

## Sheet: CC_control_up
Category	Term	Count	X.	PValue	Genes	List.Total	Pop.Hits	Pop.Total	Fold.Enrichment	Bonferroni	Benjamini	FDR
GOTERM_CC_FAT	GO:0005576~extracellular region	20	12.7389	3.44145e-10	WBGENE00020893, WBGENE00007459, WBGENE00007458, WBGENE00189949, WBGENE00020886, WBGENE00010440, WBGENE00002105, WBGENE00017091, WBGENE00003522, WBGENE00011561, WBGENE00000036, WBGENE00002109, WBGENE00044468, WBGENE00022515, WBGENE00013078, WBGENE00010539, WBGENE00002090, WBGENE00000535, WBGENE00002254, WBGENE00002086	36	551	5006	5.04739	1.85838e-08	1.85838e-08	3.37143e-07

## Sheet: BP_control_down
Category	Term	Count	X.	PValue	Genes	List.Total	Pop.Hits	Pop.Total	Fold.Enrichment	Bonferroni	Benjamini	FDR
GOTERM_BP_FAT	GO:0070192~chromosome organization involved in meiotic cell cycle	9	1.1335	1.93988e-05	WBGENE00001085, WBGENE00006375, WBGENE00001872, WBGENE00004333, WBGENE00000592, WBGENE00003421, WBGENE00001352, WBGENE00009254, WBGENE00004296	459	28	10368	7.2605	0.0316705	0.000545324	0.0326195
GOTERM_BP_FAT	GO:0006310~DNA recombination	21	2.64484	4.48805e-12	WBGENE00001864, WBGENE00011415, WBGENE00006375, WBGENE00006944, WBGENE00001872, WBGENE00001860, WBGENE00010056, WBGENE00007694, WBGENE00019884, WBGENE00004324, WBGENE00001867, WBGENE00003499, WBGENE00004296, WBGENE00000520, WBGENE00009124, WBGENE00004333, WBGENE00019334, WBGENE00016151, WBGENE00004322, WBGENE00003421, WBGENE00000264	459	67	10368	7.07989	7.44572e-09	3.54558e-10	7.54796e-09
GOTERM_BP_FAT	GO:0006302~double-strand break repair	12	1.51134	1.05193e-06	WBGENE00000520, WBGENE00009124, WBGENE00011415, WBGENE00006944, WBGENE00004333, WBGENE00010056, WBGENE00019334, WBGENE00004322, WBGENE00016151, WBGENE00007694, WBGENE00000264, WBGENE00004296	459	41	10368	6.61119	0.00174363	3.63566e-05	0.0017691
GOTERM_BP_FAT	GO:0000819~sister chromatid segregation	21	2.64484	3.28062e-10	WBGENE00001829, WBGENE00001860, WBGENE00002231, WBGENE00003367, WBGENE00004874, WBGENE00001284, WBGENE00004873, WBGENE00019884, WBGENE00003210, WBGENE00001352, WBGENE00001869, WBGENE00000383, WBGENE00022741, WBGENE00001085, WBGENE00004747, WBGENE00000592, WBGENE00004333, WBGENE00016151, WBGENE00003576, WBGENE00000257, WBGENE00009254	459	83	10368	5.7151	5.44255e-07	2.09329e-08	5.51729e-07
GOTERM_BP_FAT	GO:0000070~mitotic sister chromatid segregation	17	2.14106	3.56466e-08	WBGENE00001829, WBGENE00001860, WBGENE00002231, WBGENE00003367, WBGENE00004874, WBGENE00001284, WBGENE00004873, WBGENE00003210, WBGENE00001352, WBGENE00001869, WBGENE00000383, WBGENE00022741, WBGENE00001085, WBGENE00004747, WBGENE00000257, WBGENE00003576, WBGENE00009254	459	69	10368	5.56522	5.9136e-05	1.64271e-06	5.99498e-05
GOTERM_BP_FAT	GO:0045132~meiotic chromosome segregation	37	4.65995	9.61885e-16	WBGENE00006375, WBGENE00011415, WBGENE00001872, WBGENE00004324, WBGENE00016381, WBGENE00022741, WBGENE00011142, WBGENE00000226, WBGENE00004333, WBGENE00000592, WBGENE00016151, WBGENE00012795, WBGENE00003421, WBGENE00000264, WBGENE00006406, WBGENE00004051, WBGENE00015813, WBGENE00001864, WBGENE00000939, WBGENE00001829, WBGENE00002231, WBGENE00019884, WBGENE00001352, WBGENE00001867, WBGENE00003499,…	459	167	10368	5.00458	1.65767e-12	1.10467e-13	1.67644e-12
GOTERM_BP_FAT	GO:0098813~nuclear chromosome segregation	47	5.9194	1.43838e-19	WBGENE00006375, WBGENE00011415, WBGENE00001872, WBGENE00003367, WBGENE00004874, WBGENE00001284, WBGENE00004873, WBGENE00004324, WBGENE00016381, WBGENE00022741, WBGENE00011142, WBGENE00000226, WBGENE00004333, WBGENE00000592, WBGENE00016151, WBGENE00012795, WBGENE00003421, WBGENE00000264, WBGENE00006406, WBGENE00004051, WBGENE00015813, WBGENE00001864, WBGENE00000939, WBGENE00001829, WBGENE00001860,…	459	217	10368	4.89238	2.38627e-16	2.98284e-17	2.41904e-16
GOTERM_BP_FAT	GO:0006281~DNA repair	35	4.40806	2.21449e-14	WBGENE00019004, WBGENE00011415, WBGENE00001872, WBGENE00006961, WBGENE00004049, WBGENE00001974, WBGENE00020935, WBGENE00001997, WBGENE00004873, WBGENE00004879, WBGENE00009124, WBGENE00015310, WBGENE00000226, WBGENE00004333, WBGENE00019334, WBGENE00016151, WBGENE00003421, WBGENE00000264, WBGENE00017696, WBGENE00014066, WBGENE00007723, WBGENE00006944, WBGENE00001860, WBGENE00020964, WBGENE00010056,…	459	164	10368	4.82066	3.6653e-11	2.29083e-12	3.71592e-11
GOTERM_BP_FAT	GO:0007059~chromosome segregation	48	6.04534	1.18865e-18	WBGENE00006375, WBGENE00011415, WBGENE00001872, WBGENE00003367, WBGENE00004874, WBGENE00001284, WBGENE00004873, WBGENE00004324, WBGENE00016381, WBGENE00022741, WBGENE00011142, WBGENE00000226, WBGENE00004333, WBGENE00000592, WBGENE00016151, WBGENE00012795, WBGENE00003421, WBGENE00000264, WBGENE00006406, WBGENE00004051, WBGENE00015813, WBGENE00001864, WBGENE00000939, WBGENE00001829, WBGENE00001860,…	459	238	10368	4.55561	1.97197e-15	1.64331e-16	1.99905e-15
GOTERM_BP_FAT	GO:0006974~cellular response to DNA damage stimulus	49	6.17128	1.67828e-18	WBGENE00019004, WBGENE00001872, WBGENE00006961, WBGENE00001974, WBGENE00020935, WBGENE00004873, WBGENE00004879, WBGENE00004117, WBGENE00000226, WBGENE00004333, WBGENE00000537, WBGENE00019334, WBGENE00016151, WBGENE00000264, WBGENE00001860, WBGENE00004064, WBGENE00015203, WBGENE00007433, WBGENE00004322, WBGENE00000151, WBGENE00002276, WBGENE00001118, WBGENE00004800, WBGENE00011415, WBGENE00004049,…	459	250	10368	4.42729	2.78427e-15	1.98877e-16	2.8225e-15
GOTERM_BP_FAT	GO:0006259~DNA metabolic process	52	6.54912	7.55891e-19	WBGENE00000413, WBGENE00019004, WBGENE00011415, WBGENE00017304, WBGENE00006375, WBGENE00001872, WBGENE00006961, WBGENE00004049, WBGENE00001974, WBGENE00020935, WBGENE00001997, WBGENE00004873, WBGENE00004324, WBGENE00004879, WBGENE00009124, WBGENE00015310, WBGENE00000226, WBGENE00004333, WBGENE00000537, WBGENE00019334, WBGENE00016151, WBGENE00003421, WBGENE00000264, WBGENE00017696, WBGENE00014066,…	459	276	10368	4.25575	1.25402e-15	1.39336e-16	1.27124e-15
GOTERM_BP_FAT	GO:0007126~meiotic nuclear division	43	5.41562	2.33466e-14	WBGENE00006375, WBGENE00011415, WBGENE00001872, WBGENE00004324, WBGENE00016381, WBGENE00022741, WBGENE00008107, WBGENE00011142, WBGENE00000226, WBGENE00004333, WBGENE00000592, WBGENE00016151, WBGENE00012795, WBGENE00003421, WBGENE00000264, WBGENE00006406, WBGENE00004051, WBGENE00015813, WBGENE00001864, WBGENE00000939, WBGENE00001829, WBGENE00002231, WBGENE00019884, WBGENE00001352, WBGENE00001867,…	459	246	10368	3.94835	3.86791e-11	2.27529e-12	3.92131e-11
GOTERM_BP_FAT	GO:1903046~meiotic cell cycle process	43	5.41562	6.33803e-14	WBGENE00006375, WBGENE00011415, WBGENE00001872, WBGENE00004324, WBGENE00016381, WBGENE00022741, WBGENE00008107, WBGENE00011142, WBGENE00000226, WBGENE00004333, WBGENE00000592, WBGENE00016151, WBGENE00012795, WBGENE00003421, WBGENE00000264, WBGENE00006406, WBGENE00004051, WBGENE00015813, WBGENE00001864, WBGENE00000939, WBGENE00001829, WBGENE00002231, WBGENE00019884, WBGENE00001352, WBGENE00001867,…	459	253	10368	3.83911	1.0517e-10	5.53524e-12	1.06615e-10
GOTERM_BP_FAT	GO:0051783~regulation of nuclear division	23	2.89673	1.12434e-07	WBGENE00001595, WBGENE00001596, WBGENE00022794, WBGENE00003389, WBGENE00016397, WBGENE00006375, WBGENE00002231, WBGENE00010629, WBGENE00001284, WBGENE00000880, WBGENE00000383, WBGENE00016245, WBGENE00022741, WBGENE00009672, WBGENE00017605, WBGENE00255595, WBGENE00007412, WBGENE00022855, WBGENE00001609, WBGENE00000257, WBGENE00009267, WBGENE00002201, WBGENE00001040	459	136	10368	3.82007	0.000186511	4.78277e-06	0.000189089
GOTERM_BP_FAT	GO:0040020~regulation of meiotic nuclear division	17	2.14106	1.1866e-05	WBGENE00001595, WBGENE00001596, WBGENE00022794, WBGENE00003389, WBGENE00006375, WBGENE00010629, WBGENE00000880, WBGENE00016245, WBGENE00009672, WBGENE00017605, WBGENE00255595, WBGENE00007412, WBGENE00022855, WBGENE00001609, WBGENE00001040, WBGENE00002201, WBGENE00009267	459	104	10368	3.69231	0.0194933	0.000345305	0.0199541
GOTERM_BP_FAT	GO:0000280~nuclear division	72	9.06801	4.79994e-22	WBGENE00003389, WBGENE00001872, WBGENE00004874, WBGENE00001284, WBGENE00004873, WBGENE00000880, WBGENE00004324, WBGENE00016381, WBGENE00016245, WBGENE00022741, WBGENE00008107, WBGENE00000226, WBGENE00004333, WBGENE00016151, WBGENE00000264, WBGENE00015813, WBGENE00001595, WBGENE00001596, WBGENE00001864, WBGENE00016397, WBGENE00001829, WBGENE00000939, WBGENE00002231, WBGENE00001860, WBGENE00019884,…	459	446	10368	3.64653	7.96311e-19	1.32718e-19	8.07245e-19
GOTERM_BP_FAT	GO:0051321~meiotic cell cycle	62	7.80856	7.59677e-19	WBGENE00003389, WBGENE00001872, WBGENE00004874, WBGENE00001284, WBGENE00000880, WBGENE00004324, WBGENE00016381, WBGENE00016245, WBGENE00022741, WBGENE00008107, WBGENE00000226, WBGENE00004333, WBGENE00016151, WBGENE00000264, WBGENE00015813, WBGENE00001595, WBGENE00001864, WBGENE00001596, WBGENE00001829, WBGENE00000939, WBGENE00002231, WBGENE00019884, WBGENE00001867, WBGENE00003499, WBGENE00000770,…	459	386	10368	3.62816	1.2603e-15	1.2603e-16	1.27761e-15
GOTERM_BP_FAT	GO:0048285~organelle fission	73	9.19395	3.39611e-22	WBGENE00001134, WBGENE00003389, WBGENE00001872, WBGENE00004874, WBGENE00001284, WBGENE00004873, WBGENE00000880, WBGENE00004324, WBGENE00016381, WBGENE00016245, WBGENE00022741, WBGENE00008107, WBGENE00000226, WBGENE00004333, WBGENE00016151, WBGENE00000264, WBGENE00015813, WBGENE00001595, WBGENE00001596, WBGENE00001864, WBGENE00016397, WBGENE00001829, WBGENE00000939, WBGENE00002231, WBGENE00001860,…	459	455	10368	3.62405	5.63415e-19	1.12683e-19	5.71151e-19
GOTERM_BP_FAT	GO:0051445~regulation of meiotic cell cycle	22	2.77078	1.44563e-06	WBGENE00001595, WBGENE00001596, WBGENE00022794, WBGENE00003389, WBGENE00006375, WBGENE00001872, WBGENE00010629, WBGENE00004874, WBGENE00000880, WBGENE00016944, WBGENE00016245, WBGENE00003784, WBGENE00009672, WBGENE00017605, WBGENE00255595, WBGENE00007412, WBGENE00022855, WBGENE00001609, WBGENE00009254, WBGENE00001040, WBGENE00002201, WBGENE00009267	459	145	10368	3.42718	0.00239544	4.89439e-05	0.00243121
GOTERM_BP_FAT	GO:0051276~chromosome organization	52	6.54912	2.55484e-14	WBGENE00007914, WBGENE00001872, WBGENE00011532, WBGENE00045419, WBGENE00001284, WBGENE00004874, WBGENE00004873, WBGENE00004323, WBGENE00022741, WBGENE00004117, WBGENE00004333, WBGENE00019334, WBGENE00000537, WBGENE00016151, WBGENE00000264, WBGENE00019627, WBGENE00006618, WBGENE00001829, WBGENE00001860, WBGENE00002231, WBGENE00019884, WBGENE00006382, WBGENE00001869, WBGENE00004319, WBGENE00004747,…	459	350	10368	3.35597	4.23628e-11	2.35345e-12	4.29434e-11
GOTERM_BP_FAT	GO:0022402~cell cycle process	87	10.9572	1.35688e-22	WBGENE00003389, WBGENE00001872, WBGENE00020935, WBGENE00004874, WBGENE00001284, WBGENE00004873, WBGENE00000880, WBGENE00004324, WBGENE00016381, WBGENE00016245, WBGENE00022741, WBGENE00008107, WBGENE00000226, WBGENE00004333, WBGENE00000537, WBGENE00016151, WBGENE00000264, WBGENE00001595, WBGENE00015813, WBGENE00001596, WBGENE00001864, WBGENE00016397, WBGENE00000939, WBGENE00001829, WBGENE00002231,…	459	618	10368	3.1799	2.25107e-19	7.50356e-20	2.28198e-19
GOTERM_BP_FAT	GO:0010564~regulation of cell cycle process	27	3.4005	3.15069e-07	WBGENE00003389, WBGENE00006375, WBGENE00020935, WBGENE00010629, WBGENE00001284, WBGENE00000880, WBGENE00016245, WBGENE00022741, WBGENE00009672, WBGENE00077732, WBGENE00000264, WBGENE00009267, WBGENE00001595, WBGENE00001596, WBGENE00016397, WBGENE00022794, WBGENE00002231, WBGENE00000383, WBGENE00017605, WBGENE00255595, WBGENE00004105, WBGENE00007412, WBGENE00022855, WBGENE00001609, WBGENE00000257,…	459	192	10368	3.17647	0.000522562	1.1363e-05	0.000529875
GOTERM_BP_FAT	GO:0040027~negative regulation of vulval development	29	3.65239	1.69579e-07	WBGENE00000156, WBGENE00007914, WBGENE00044329, WBGENE00003222, WBGENE00003164, WBGENE00004117, WBGENE00003021, WBGENE00006349, WBGENE00017967, WBGENE00017313, WBGENE00016409, WBGENE00006975, WBGENE00009267, WBGENE00001595, WBGENE00000409, WBGENE00007042, WBGENE00008684, WBGENE00004319, WBGENE00002295, WBGENE00004746, WBGENE00003786, WBGENE00011318, WBGENE00001081, WBGENE00017004, WBGENE00004244,…	459	211	10368	3.10454	0.000281292	6.54258e-06	0.000285195
GOTERM_BP_FAT	GO:0042127~regulation of cell proliferation	22	2.77078	7.91205e-06	WBGENE00001595, WBGENE00001596, WBGENE00022794, WBGENE00003821, WBGENE00003389, WBGENE00010629, WBGENE00003593, WBGENE00000880, WBGENE00000018, WBGENE00002194, WBGENE00016944, WBGENE00016245, WBGENE00009672, WBGENE00017605, WBGENE00255595, WBGENE00007412, WBGENE00022855, WBGENE00001609, WBGENE00016416, WBGENE00000264, WBGENE00009267, WBGENE00001040	459	161	10368	3.08659	0.0130404	0.000243047	0.0133055
GOTERM_BP_FAT	GO:0051726~regulation of cell cycle	38	4.78589	1.68624e-09	WBGENE00003389, WBGENE00017078, WBGENE00006375, WBGENE00001872, WBGENE00020935, WBGENE00010629, WBGENE00001997, WBGENE00001284, WBGENE00004874, WBGENE00000880, WBGENE00016245, WBGENE00022741, WBGENE00009672, WBGENE00077732, WBGENE00000264, WBGENE00009267, WBGENE00001595, WBGENE00001596, WBGENE00016397, WBGENE00022794, WBGENE00002231, WBGENE00000409, WBGENE00019884, WBGENE00016944, WBGENE00000383,…	459	279	10368	3.07653	2.79746e-06	9.32488e-08	2.83588e-06
GOTERM_BP_FAT	GO:0007049~cell cycle	90	11.335	8.50503e-22	WBGENE00003389, WBGENE00001872, WBGENE00020935, WBGENE00004874, WBGENE00001284, WBGENE00004873, WBGENE00000880, WBGENE00004324, WBGENE00016381, WBGENE00016245, WBGENE00022741, WBGENE00008107, WBGENE00000226, WBGENE00004333, WBGENE00000537, WBGENE00016151, WBGENE00000264, WBGENE00001595, WBGENE00015813, WBGENE00001596, WBGENE00001864, WBGENE00016397, WBGENE00000939, WBGENE00001829, WBGENE00002231,…	459	674	10368	3.01623	1.41098e-18	2.01569e-19	1.43036e-18
GOTERM_BP_FAT	GO:0007067~mitotic nuclear division	22	2.77078	1.16379e-05	WBGENE00016360, WBGENE00001829, WBGENE00001860, WBGENE00002231, WBGENE00194651, WBGENE00003367, WBGENE00004874, WBGENE00001284, WBGENE00004873, WBGENE00003210, WBGENE00006874, WBGENE00001352, WBGENE00001869, WBGENE00000383, WBGENE00022741, WBGENE00007710, WBGENE00001085, WBGENE00004747, WBGENE00002223, WBGENE00003576, WBGENE00000257, WBGENE00009254	459	165	10368	3.01176	0.0191222	0.000344715	0.0195706
GOTERM_BP_FAT	GO:0061064~negative regulation of nematode larval development	29	3.65239	5.92776e-07	WBGENE00000156, WBGENE00007914, WBGENE00044329, WBGENE00003222, WBGENE00003164, WBGENE00004117, WBGENE00003021, WBGENE00006349, WBGENE00017967, WBGENE00017313, WBGENE00016409, WBGENE00006975, WBGENE00009267, WBGENE00001595, WBGENE00000409, WBGENE00007042, WBGENE00008684, WBGENE00004319, WBGENE00002295, WBGENE00004746, WBGENE00003786, WBGENE00011318, WBGENE00001081, WBGENE00017004, WBGENE00004244,…	459	224	10368	2.92437	0.000982933	2.09235e-05	0.000996915
GOTERM_BP_FAT	GO:0048581~negative regulation of post-embryonic development	29	3.65239	5.92776e-07	WBGENE00000156, WBGENE00007914, WBGENE00044329, WBGENE00003222, WBGENE00003164, WBGENE00004117, WBGENE00003021, WBGENE00006349, WBGENE00017967, WBGENE00017313, WBGENE00016409, WBGENE00006975, WBGENE00009267, WBGENE00001595, WBGENE00000409, WBGENE00007042, WBGENE00008684, WBGENE00004319, WBGENE00002295, WBGENE00004746, WBGENE00003786, WBGENE00011318, WBGENE00001081, WBGENE00017004, WBGENE00004244,…	459	224	10368	2.92437	0.000982933	2.09235e-05	0.000996915
GOTERM_BP_FAT	GO:0040028~regulation of vulval development	33	4.15617	1.4352e-07	WBGENE00000156, WBGENE00007914, WBGENE00044329, WBGENE00045419, WBGENE00003222, WBGENE00003164, WBGENE00001653, WBGENE00004117, WBGENE00003021, WBGENE00006349, WBGENE00017967, WBGENE00017313, WBGENE00016409, WBGENE00006975, WBGENE00009267, WBGENE00001595, WBGENE00000409, WBGENE00007042, WBGENE00008684, WBGENE00004319, WBGENE00002295, WBGENE00004746, WBGENE00003786, WBGENE00003012, WBGENE00011318,…	459	261	10368	2.85598	0.000238071	5.80729e-06	0.000241369
GOTERM_BP_FAT	GO:0033043~regulation of organelle organization	33	4.15617	2.04653e-07	WBGENE00000156, WBGENE00003389, WBGENE00022880, WBGENE00006375, WBGENE00010629, WBGENE00001284, WBGENE00000880, WBGENE00016245, WBGENE00022741, WBGENE00009672, WBGENE00077732, WBGENE00017967, WBGENE00000264, WBGENE00009267, WBGENE00001595, WBGENE00001596, WBGENE00016397, WBGENE00022794, WBGENE00002231, WBGENE00016391, WBGENE00000911, WBGENE00000383, WBGENE00017605, WBGENE00255595, WBGENE00004105,…	459	265	10368	2.81287	0.000339462	7.71634e-06	0.000344182
GOTERM_BP_FAT	GO:0007017~microtubule-based process	26	3.27456	8.84639e-06	WBGENE00000156, WBGENE00001118, WBGENE00016005, WBGENE00004873, WBGENE00004121, WBGENE00004955, WBGENE00008107, WBGENE00004333, WBGENE00077732, WBGENE00001121, WBGENE00000490, WBGENE00007154, WBGENE00002218, WBGENE00016397, WBGENE00001829, WBGENE00001127, WBGENE00002231, WBGENE00006874, WBGENE00000383, WBGENE00007710, WBGENE00011647, WBGENE00004105, WBGENE00002223, WBGENE00003576, WBGENE00000257,…	459	215	10368	2.7316	0.0145691	0.000266805	0.0148766
GOTERM_BP_FAT	GO:0000278~mitotic cell cycle	38	4.78589	5.91652e-08	WBGENE00000156, WBGENE00016360, WBGENE00001872, WBGENE00003367, WBGENE00194651, WBGENE00020935, WBGENE00001997, WBGENE00001284, WBGENE00004874, WBGENE00004873, WBGENE00004955, WBGENE00022741, WBGENE00003777, WBGENE00006443, WBGENE00001595, WBGENE00016397, WBGENE00001829, WBGENE00001860, WBGENE00002231, WBGENE00000409, WBGENE00019884, WBGENE00003210, WBGENE00006874, WBGENE00001352, WBGENE00009163,…	459	318	10368	2.69922	9.81503e-05	2.65284e-06	9.95029e-05
GOTERM_BP_FAT	GO:0061062~regulation of nematode larval development	36	4.53401	1.6525e-07	WBGENE00000156, WBGENE00009178, WBGENE00007914, WBGENE00044329, WBGENE00045419, WBGENE00003222, WBGENE00003164, WBGENE00001653, WBGENE00004117, WBGENE00003021, WBGENE00006349, WBGENE00017967, WBGENE00017313, WBGENE00016409, WBGENE00009267, WBGENE00006975, WBGENE00001595, WBGENE00000409, WBGENE00007042, WBGENE00000913, WBGENE00008684, WBGENE00004319, WBGENE00002295, WBGENE00004746, WBGENE00003786,…	459	303	10368	2.68375	0.000274113	6.52737e-06	0.000277915
GOTERM_BP_FAT	GO:0048580~regulation of post-embryonic development	36	4.53401	1.6525e-07	WBGENE00000156, WBGENE00009178, WBGENE00007914, WBGENE00044329, WBGENE00045419, WBGENE00003222, WBGENE00003164, WBGENE00001653, WBGENE00004117, WBGENE00003021, WBGENE00006349, WBGENE00017967, WBGENE00017313, WBGENE00016409, WBGENE00009267, WBGENE00006975, WBGENE00001595, WBGENE00000409, WBGENE00007042, WBGENE00000913, WBGENE00008684, WBGENE00004319, WBGENE00002295, WBGENE00004746, WBGENE00003786,…	459	303	10368	2.68375	0.000274113	6.52737e-06	0.000277915
GOTERM_BP_FAT	GO:0033554~cellular response to stress	55	6.92695	3.87509e-11	WBGENE00019004, WBGENE00001872, WBGENE00006961, WBGENE00001974, WBGENE00020935, WBGENE00004873, WBGENE00015057, WBGENE00004879, WBGENE00004117, WBGENE00011771, WBGENE00000226, WBGENE00004333, WBGENE00019334, WBGENE00000537, WBGENE00016151, WBGENE00000264, WBGENE00001860, WBGENE00016391, WBGENE00004064, WBGENE00007433, WBGENE00015203, WBGENE00004322, WBGENE00000151, WBGENE00002276, WBGENE00001118,…	459	463	10368	2.68327	6.42877e-08	2.92217e-09	6.51705e-08
GOTERM_BP_FAT	GO:0040025~vulval development	39	4.91184	1.04849e-07	WBGENE00000156, WBGENE00007914, WBGENE00006961, WBGENE00044329, WBGENE00003038, WBGENE00045419, WBGENE00003222, WBGENE00003164, WBGENE00001653, WBGENE00004117, WBGENE00003021, WBGENE00006349, WBGENE00007008, WBGENE00017967, WBGENE00017313, WBGENE00016409, WBGENE00009267, WBGENE00006975, WBGENE00001595, WBGENE00000409, WBGENE00007042, WBGENE00004315, WBGENE00000913, WBGENE00006874, WBGENE00008684,…	459	339	10368	2.59865	0.00017393	4.57749e-06	0.000176333
GOTERM_BP_FAT	GO:1903047~mitotic cell cycle process	31	3.90428	3.3519e-06	WBGENE00016360, WBGENE00000156, WBGENE00003367, WBGENE00194651, WBGENE00020935, WBGENE00001997, WBGENE00001284, WBGENE00004874, WBGENE00004873, WBGENE00004955, WBGENE00022741, WBGENE00003777, WBGENE00001829, WBGENE00001860, WBGENE00002231, WBGENE00000409, WBGENE00019884, WBGENE00006874, WBGENE00003210, WBGENE00009163, WBGENE00001352, WBGENE00001869, WBGENE00000383, WBGENE00007710, WBGENE00004747,…	459	272	10368	2.57439	0.00554538	0.000104915	0.00563701
GOTERM_BP_FAT	GO:0048569~post-embryonic organ development	39	4.91184	1.42628e-07	WBGENE00000156, WBGENE00007914, WBGENE00006961, WBGENE00044329, WBGENE00003038, WBGENE00045419, WBGENE00003222, WBGENE00003164, WBGENE00001653, WBGENE00004117, WBGENE00003021, WBGENE00006349, WBGENE00007008, WBGENE00017967, WBGENE00017313, WBGENE00016409, WBGENE00009267, WBGENE00006975, WBGENE00001595, WBGENE00000409, WBGENE00007042, WBGENE00004315, WBGENE00000913, WBGENE00006874, WBGENE00008684,…	459	343	10368	2.56834	0.000236591	5.91547e-06	0.000239868
GOTERM_BP_FAT	GO:0051093~negative regulation of developmental process	29	3.65239	1.3956e-05	WBGENE00000156, WBGENE00007914, WBGENE00044329, WBGENE00003222, WBGENE00003164, WBGENE00004117, WBGENE00003021, WBGENE00006349, WBGENE00017967, WBGENE00017313, WBGENE00016409, WBGENE00006975, WBGENE00009267, WBGENE00001595, WBGENE00000409, WBGENE00007042, WBGENE00008684, WBGENE00004319, WBGENE00002295, WBGENE00004746, WBGENE00003786, WBGENE00011318, WBGENE00001081, WBGENE00017004, WBGENE00004244,…	459	263	10368	2.49072	0.0228871	0.000399112	0.0234683
GOTERM_BP_FAT	GO:0051241~negative regulation of multicellular organismal process	29	3.65239	2.43166e-05	WBGENE00000156, WBGENE00007914, WBGENE00044329, WBGENE00003222, WBGENE00003164, WBGENE00004117, WBGENE00003021, WBGENE00006349, WBGENE00017967, WBGENE00017313, WBGENE00016409, WBGENE00006975, WBGENE00009267, WBGENE00001595, WBGENE00000409, WBGENE00007042, WBGENE00008684, WBGENE00004319, WBGENE00002295, WBGENE00004746, WBGENE00003786, WBGENE00011318, WBGENE00001081, WBGENE00017004, WBGENE00004244,…	459	271	10368	2.41719	0.0395389	0.000672137	0.0408873
GOTERM_BP_FAT	GO:2000026~regulation of multicellular organismal development	40	5.03778	2.55607e-06	WBGENE00000156, WBGENE00009178, WBGENE00007914, WBGENE00001951, WBGENE00044329, WBGENE00045419, WBGENE00003222, WBGENE00003164, WBGENE00001653, WBGENE00004117, WBGENE00003777, WBGENE00003021, WBGENE00006349, WBGENE00017967, WBGENE00017313, WBGENE00006406, WBGENE00016409, WBGENE00009267, WBGENE00006975, WBGENE00001595, WBGENE00000409, WBGENE00007042, WBGENE00000913, WBGENE00008684, WBGENE00004319,…	459	400	10368	2.25882	0.00423154	8.48068e-05	0.00429866
GOTERM_BP_FAT	GO:0006396~RNA processing	40	5.03778	3.12688e-06	WBGENE00003389, WBGENE00003508, WBGENE00007050, WBGENE00002850, WBGENE00017855, WBGENE00010629, WBGENE00044329, WBGENE00013224, WBGENE00004323, WBGENE00004508, WBGENE00016245, WBGENE00009672, WBGENE00019168, WBGENE00012245, WBGENE00017313, WBGENE00010844, WBGENE00009711, WBGENE00009671, WBGENE00008934, WBGENE00011109, WBGENE00015581, WBGENE00001596, WBGENE00014218, WBGENE00022794, WBGENE00015811,…	459	403	10368	2.24201	0.00517407	0.000101711	0.00525859
GOTERM_BP_FAT	GO:1902589~single-organism organelle organization	57	7.17884	3.42695e-08	WBGENE00001134, WBGENE00016005, WBGENE00001284, WBGENE00010642, WBGENE00004874, WBGENE00004873, WBGENE00021643, WBGENE00004121, WBGENE00009098, WBGENE00022741, WBGENE00008107, WBGENE00004333, WBGENE00006349, WBGENE00016151, WBGENE00016397, WBGENE00001829, WBGENE00001127, WBGENE00002231, WBGENE00001860, WBGENE00019884, WBGENE00006874, WBGENE00001869, WBGENE00018051, WBGENE00007710, WBGENE00004747,…	459	589	10368	2.18596	5.68515e-05	1.62437e-06	5.76338e-05
GOTERM_BP_FAT	GO:0040035~hermaphrodite genitalia development	68	8.56423	4.91404e-09	WBGENE00003821, WBGENE00003596, WBGENE00006961, WBGENE00001974, WBGENE00022312, WBGENE00004874, WBGENE00045419, WBGENE00001284, WBGENE00004873, WBGENE00010044, WBGENE00014011, WBGENE00004879, WBGENE00008107, WBGENE00012650, WBGENE00015296, WBGENE00018355, WBGENE00001596, WBGENE00015811, WBGENE00010638, WBGENE00000939, WBGENE00002231, WBGENE00001860, WBGENE00006382, WBGENE00007042, WBGENE00004134,…	459	728	10368	2.10989	8.15235e-06	2.6298e-07	8.26433e-06
GOTERM_BP_FAT	GO:0048806~genitalia development	68	8.56423	7.25611e-09	WBGENE00003821, WBGENE00003596, WBGENE00006961, WBGENE00001974, WBGENE00022312, WBGENE00004874, WBGENE00045419, WBGENE00001284, WBGENE00004873, WBGENE00010044, WBGENE00014011, WBGENE00004879, WBGENE00008107, WBGENE00012650, WBGENE00015296, WBGENE00018355, WBGENE00001596, WBGENE00015811, WBGENE00010638, WBGENE00000939, WBGENE00002231, WBGENE00001860, WBGENE00006382, WBGENE00007042, WBGENE00004134,…	459	735	10368	2.0898	1.20378e-05	3.76184e-07	1.22032e-05
GOTERM_BP_FAT	GO:0044702~single organism reproductive process	140	17.6322	1.53009e-18	WBGENE00003389, WBGENE00003821, WBGENE00001872, WBGENE00003596, WBGENE00022312, WBGENE00000880, WBGENE00022741, WBGENE00012650, WBGENE00000226, WBGENE00016151, WBGENE00016354, WBGENE00015296, WBGENE00018355, WBGENE00015813, WBGENE00001864, WBGENE00015811, WBGENE00000939, WBGENE00010638, WBGENE00001860, WBGENE00000935, WBGENE00006382, WBGENE00007042, WBGENE00009163, WBGENE00003499, WBGENE00001867,…	459	1530	10368	2.0669	2.53841e-15	1.95262e-16	2.57327e-15
GOTERM_BP_FAT	GO:0006898~receptor-mediated endocytosis	66	8.31234	2.66908e-08	WBGENE00018898, WBGENE00003389, WBGENE00007627, WBGENE00000271, WBGENE00045419, WBGENE00004873, WBGENE00015091, WBGENE00010044, WBGENE00014011, WBGENE00010844, WBGENE00009711, WBGENE00015296, WBGENE00001595, WBGENE00001596, WBGENE00015811, WBGENE00010638, WBGENE00001860, WBGENE00000935, WBGENE00006382, WBGENE00001869, WBGENE00012692, WBGENE00015486, WBGENE00019400, WBGENE00007433, WBGENE00004125,…	459	727	10368	2.05065	4.42791e-05	1.34182e-06	4.48881e-05
GOTERM_BP_FAT	GO:0008406~gonad development	86	10.8312	1.09979e-10	WBGENE00018898, WBGENE00003821, WBGENE00003596, WBGENE00001872, WBGENE00006961, WBGENE00001974, WBGENE00022312, WBGENE00004874, WBGENE00045419, WBGENE00001284, WBGENE00004873, WBGENE00010044, WBGENE00014011, WBGENE00016245, WBGENE00004879, WBGENE00008107, WBGENE00012650, WBGENE00019432, WBGENE00015296, WBGENE00018355, WBGENE00001596, WBGENE00015811, WBGENE00010638, WBGENE00000939, WBGENE00002231,…	459	949	10368	2.04698	1.82454e-07	7.60227e-09	1.8496e-07
GOTERM_BP_FAT	GO:0045137~development of primary sexual characteristics	86	10.8312	1.09979e-10	WBGENE00018898, WBGENE00003821, WBGENE00003596, WBGENE00001872, WBGENE00006961, WBGENE00001974, WBGENE00022312, WBGENE00004874, WBGENE00045419, WBGENE00001284, WBGENE00004873, WBGENE00010044, WBGENE00014011, WBGENE00016245, WBGENE00004879, WBGENE00008107, WBGENE00012650, WBGENE00019432, WBGENE00015296, WBGENE00018355, WBGENE00001596, WBGENE00015811, WBGENE00010638, WBGENE00000939, WBGENE00002231,…	459	949	10368	2.04698	1.82454e-07	7.60227e-09	1.8496e-07
GOTERM_BP_FAT	GO:0061458~reproductive system development	86	10.8312	1.99523e-10	WBGENE00018898, WBGENE00003821, WBGENE00003596, WBGENE00001872, WBGENE00006961, WBGENE00001974, WBGENE00022312, WBGENE00004874, WBGENE00045419, WBGENE00001284, WBGENE00004873, WBGENE00010044, WBGENE00014011, WBGENE00016245, WBGENE00004879, WBGENE00008107, WBGENE00012650, WBGENE00019432, WBGENE00015296, WBGENE00018355, WBGENE00001596, WBGENE00015811, WBGENE00010638, WBGENE00000939, WBGENE00002231,…	459	960	10368	2.02353	3.31009e-07	1.32404e-08	3.35555e-07
GOTERM_BP_FAT	GO:0048608~reproductive structure development	86	10.8312	1.99523e-10	WBGENE00018898, WBGENE00003821, WBGENE00003596, WBGENE00001872, WBGENE00006961, WBGENE00001974, WBGENE00022312, WBGENE00004874, WBGENE00045419, WBGENE00001284, WBGENE00004873, WBGENE00010044, WBGENE00014011, WBGENE00016245, WBGENE00004879, WBGENE00008107, WBGENE00012650, WBGENE00019432, WBGENE00015296, WBGENE00018355, WBGENE00001596, WBGENE00015811, WBGENE00010638, WBGENE00000939, WBGENE00002231,…	459	960	10368	2.02353	3.31009e-07	1.32404e-08	3.35555e-07
GOTERM_BP_FAT	GO:0007548~sex differentiation	92	11.5869	4.55904e-11	WBGENE00018898, WBGENE00003821, WBGENE00003596, WBGENE00001872, WBGENE00006961, WBGENE00001974, WBGENE00022312, WBGENE00004874, WBGENE00001284, WBGENE00045419, WBGENE00004873, WBGENE00000880, WBGENE00010044, WBGENE00014011, WBGENE00016245, WBGENE00004879, WBGENE00008107, WBGENE00012650, WBGENE00004117, WBGENE00019432, WBGENE00015296, WBGENE00018355, WBGENE00001596, WBGENE00015811, WBGENE00000939,…	459	1031	10368	2.01563	7.56345e-08	3.28846e-09	7.66731e-08
GOTERM_BP_FAT	GO:0003006~developmental process involved in reproduction	114	14.3577	5.61146e-13	WBGENE00003389, WBGENE00003821, WBGENE00003596, WBGENE00001872, WBGENE00022312, WBGENE00000880, WBGENE00012650, WBGENE00016354, WBGENE00015296, WBGENE00018355, WBGENE00015813, WBGENE00015811, WBGENE00000939, WBGENE00010638, WBGENE00001860, WBGENE00000935, WBGENE00006382, WBGENE00007042, WBGENE00009163, WBGENE00001869, WBGENE00003784, WBGENE00004747, WBGENE00007433, WBGENE00004746, WBGENE00020263,…	459	1315	10368	1.95822	9.30876e-10	4.65438e-11	9.43656e-10
GOTERM_BP_FAT	GO:0010171~body morphogenesis	54	6.80101	3.25414e-06	WBGENE00001134, WBGENE00003821, WBGENE00003389, WBGENE00010044, WBGENE00017642, WBGENE00017985, WBGENE00017785, WBGENE00011109, WBGENE00015813, WBGENE00000409, WBGENE00007042, WBGENE00006382, WBGENE00004315, WBGENE00011597, WBGENE00001867, WBGENE00015486, WBGENE00007710, WBGENE00004747, WBGENE00001085, WBGENE00007433, WBGENE00004746, WBGENE00019237, WBGENE00004125, WBGENE00001081, WBGENE00002696,…	459	627	10368	1.9454	0.00538408	0.000103814	0.00547261
GOTERM_BP_FAT	GO:0006897~endocytosis	74	9.3199	3.10381e-08	WBGENE00018898, WBGENE00003389, WBGENE00007627, WBGENE00000271, WBGENE00045419, WBGENE00004873, WBGENE00015091, WBGENE00010044, WBGENE00014011, WBGENE00010844, WBGENE00009711, WBGENE00015296, WBGENE00001595, WBGENE00001596, WBGENE00015811, WBGENE00010638, WBGENE00001860, WBGENE00000935, WBGENE00006382, WBGENE00001869, WBGENE00012692, WBGENE00015486, WBGENE00019400, WBGENE00007433, WBGENE00004125,…	459	861	10368	1.94138	5.14909e-05	1.51448e-06	5.21993e-05
GOTERM_BP_FAT	GO:0022414~reproductive process	161	20.2771	1.0593e-18	WBGENE00003389, WBGENE00003821, WBGENE00001872, WBGENE00003596, WBGENE00022312, WBGENE00000880, WBGENE00022741, WBGENE00012650, WBGENE00000226, WBGENE00016151, WBGENE00016354, WBGENE00015296, WBGENE00015813, WBGENE00018355, WBGENE00001864, WBGENE00015811, WBGENE00000939, WBGENE00010638, WBGENE00001127, WBGENE00001860, WBGENE00000935, WBGENE00006382, WBGENE00007042, WBGENE00009163, WBGENE00003499,…	459	1886	10368	1.92826	1.75738e-15	1.59762e-16	1.78151e-15
GOTERM_BP_FAT	GO:0016192~vesicle-mediated transport	82	10.3275	2.85173e-07	WBGENE00018898, WBGENE00003389, WBGENE00022880, WBGENE00007627, WBGENE00000271, WBGENE00045419, WBGENE00004873, WBGENE00015091, WBGENE00010044, WBGENE00013985, WBGENE00014011, WBGENE00009098, WBGENE00010844, WBGENE00009711, WBGENE00015296, WBGENE00001595, WBGENE00001596, WBGENE00015811, WBGENE00010638, WBGENE00001860, WBGENE00000935, WBGENE00006382, WBGENE00001869, WBGENE00012692, WBGENE00015486,…	459	1049	10368	1.76572	0.000472991	1.05133e-05	0.000479598
GOTERM_BP_FAT	GO:0000003~reproduction	223	28.0856	3.03326e-22	WBGENE00003821, WBGENE00007586, WBGENE00020467, WBGENE00022312, WBGENE00015091, WBGENE00016816, WBGENE00003827, WBGENE00013985, WBGENE00022741, WBGENE00000537, WBGENE00016151, WBGENE00016354, WBGENE00021311, WBGENE00015296, WBGENE00018355, WBGENE00010638, WBGENE00000939, WBGENE00000409, WBGENE00000935, WBGENE00007042, WBGENE00009163, WBGENE00011720, WBGENE00009946, WBGENE00007433, WBGENE00003034,…	459	2878	10368	1.75024	5.03218e-19	1.25805e-19	5.10128e-19
GOTERM_BP_FAT	GO:0009792~embryo development ending in birth or egg hatching	227	28.5894	8.45274e-23	WBGENE00007586, WBGENE00022312, WBGENE00003038, WBGENE00015091, WBGENE00016816, WBGENE00008197, WBGENE00003827, WBGENE00013985, WBGENE00015976, WBGENE00016154, WBGENE00000537, WBGENE00016151, WBGENE00010844, WBGENE00021311, WBGENE00015296, WBGENE00002072, WBGENE00013855, WBGENE00018355, WBGENE00015581, WBGENE00010638, WBGENE00000409, WBGENE00007042, WBGENE00009163, WBGENE00012474, WBGENE00015486,…	459	2930	10368	1.75001	1.40231e-19	7.01154e-20	1.42156e-19
GOTERM_BP_FAT	GO:0009790~embryo development	231	29.0932	6.68507e-23	WBGENE00007586, WBGENE00022312, WBGENE00003038, WBGENE00015091, WBGENE00016816, WBGENE00008197, WBGENE00003827, WBGENE00013985, WBGENE00015976, WBGENE00016154, WBGENE00015666, WBGENE00000537, WBGENE00016151, WBGENE00010844, WBGENE00021311, WBGENE00015296, WBGENE00002072, WBGENE00013855, WBGENE00018355, WBGENE00015581, WBGENE00010638, WBGENE00000409, WBGENE00007042, WBGENE00009163, WBGENE00012474,…	459	3004	10368	1.73698	1.10905e-19	1.10905e-19	1.12428e-19
GOTERM_BP_FAT	GO:0002119~nematode larval development	150	18.8917	9.45606e-10	WBGENE00003389, WBGENE00003821, WBGENE00001134, WBGENE00007586, WBGENE00003596, WBGENE00007627, WBGENE00022312, WBGENE00003038, WBGENE00015091, WBGENE00002163, WBGENE00012650, WBGENE00016409, WBGENE00015813, WBGENE00018355, WBGENE00015811, WBGENE00000939, WBGENE00001127, WBGENE00000409, WBGENE00001860, WBGENE00006382, WBGENE00007042, WBGENE00012474, WBGENE00018051, WBGENE00012692, WBGENE00000101,…	459	2147	10368	1.57813	1.56876e-06	5.81022e-08	1.5903e-06
GOTERM_BP_FAT	GO:0002164~larval development	150	18.8917	1.03172e-09	WBGENE00003389, WBGENE00003821, WBGENE00001134, WBGENE00007586, WBGENE00003596, WBGENE00007627, WBGENE00022312, WBGENE00003038, WBGENE00015091, WBGENE00002163, WBGENE00012650, WBGENE00016409, WBGENE00015813, WBGENE00018355, WBGENE00015811, WBGENE00000939, WBGENE00001127, WBGENE00000409, WBGENE00001860, WBGENE00006382, WBGENE00007042, WBGENE00012474, WBGENE00018051, WBGENE00012692, WBGENE00000101,…	459	2149	10368	1.57666	1.71163e-06	5.90218e-08	1.73513e-06
GOTERM_BP_FAT	GO:0009791~post-embryonic development	151	19.0176	1.00829e-09	WBGENE00003389, WBGENE00003821, WBGENE00001134, WBGENE00007586, WBGENE00003596, WBGENE00007627, WBGENE00022312, WBGENE00003038, WBGENE00015091, WBGENE00002163, WBGENE00012650, WBGENE00016409, WBGENE00015813, WBGENE00018355, WBGENE00015811, WBGENE00000939, WBGENE00001127, WBGENE00000409, WBGENE00001860, WBGENE00006382, WBGENE00007042, WBGENE00012474, WBGENE00018051, WBGENE00012692, WBGENE00000101,…	459	2168	10368	1.57326	1.67275e-06	5.97411e-08	1.69572e-06

## Sheet: MF_control_down
Category	Term	Count	X.	PValue	Genes	List.Total	Pop.Hits	Pop.Total	Fold.Enrichment	Bonferroni	Benjamini	FDR
GOTERM_MF_FAT	GO:0008094~DNA-dependent ATPase activity	9	1.1335	2.95262e-05	WBGENE00006595, WBGENE00000520, WBGENE00009124, WBGENE00006944, WBGENE00019334, WBGENE00004322, WBGENE00004337, WBGENE00019884, WBGENE00004296	337	32	8309	6.93444	0.0149748	0.000887141	0.0426405
GOTERM_MF_FAT	GO:0005524~ATP binding	78	9.82368	4.06051e-10	WBGENE00018898, WBGENE00003389, WBGENE00001872, WBGENE00006961, WBGENE00004874, WBGENE00004873, WBGENE00017050, WBGENE00020781, WBGENE00012726, WBGENE00004879, WBGENE00011299, WBGENE00014004, WBGENE00012650, WBGENE00011771, WBGENE00000226, WBGENE00019334, WBGENE00003396, WBGENE00007761, WBGENE00002218, WBGENE00001596, WBGENE00010369, WBGENE00000939, WBGENE00006971, WBGENE00012437, WBGENE00000409,…	337	936	8309	2.05465	2.07492e-07	5.18731e-08	5.8652e-07
GOTERM_MF_FAT	GO:0032559~adenyl ribonucleotide binding	78	9.82368	4.33846e-10	WBGENE00018898, WBGENE00003389, WBGENE00001872, WBGENE00006961, WBGENE00004874, WBGENE00004873, WBGENE00017050, WBGENE00020781, WBGENE00012726, WBGENE00004879, WBGENE00011299, WBGENE00014004, WBGENE00012650, WBGENE00011771, WBGENE00000226, WBGENE00019334, WBGENE00003396, WBGENE00007761, WBGENE00002218, WBGENE00001596, WBGENE00010369, WBGENE00000939, WBGENE00006971, WBGENE00012437, WBGENE00000409,…	337	937	8309	2.05246	2.21695e-07	4.43391e-08	6.26668e-07
GOTERM_MF_FAT	GO:0030554~adenyl nucleotide binding	78	9.82368	4.55783e-10	WBGENE00018898, WBGENE00003389, WBGENE00001872, WBGENE00006961, WBGENE00004874, WBGENE00004873, WBGENE00017050, WBGENE00020781, WBGENE00012726, WBGENE00004879, WBGENE00011299, WBGENE00014004, WBGENE00012650, WBGENE00011771, WBGENE00000226, WBGENE00019334, WBGENE00003396, WBGENE00007761, WBGENE00002218, WBGENE00001596, WBGENE00010369, WBGENE00000939, WBGENE00006971, WBGENE00012437, WBGENE00000409,…	337	938	8309	2.05027	2.32905e-07	3.88175e-08	6.58354e-07
GOTERM_MF_FAT	GO:0003676~nucleic acid binding	135	17.0025	8.94951e-19	WBGENE00001029, WBGENE00003389, WBGENE00019004, WBGENE00001872, WBGENE00007627, WBGENE00015091, WBGENE00003827, WBGENE00000226, WBGENE00016154, WBGENE00000537, WBGENE00021311, WBGENE00015296, WBGENE00006618, WBGENE00018355, WBGENE00015813, WBGENE00015581, WBGENE00015811, WBGENE00000939, WBGENE00001035, WBGENE00001860, WBGENE00000935, WBGENE00009477, WBGENE00006382, WBGENE00009163, WBGENE00000096,…	337	1626	8309	2.04707	4.5732e-16	1.5244e-16	1.29271e-15
GOTERM_MF_FAT	GO:0032555~purine ribonucleotide binding	82	10.3275	7.1574e-08	WBGENE00018898, WBGENE00001134, WBGENE00003821, WBGENE00003389, WBGENE00001872, WBGENE00003596, WBGENE00006961, WBGENE00004874, WBGENE00004873, WBGENE00017050, WBGENE00020781, WBGENE00012726, WBGENE00004879, WBGENE00011299, WBGENE00014004, WBGENE00012650, WBGENE00011771, WBGENE00000226, WBGENE00019334, WBGENE00003396, WBGENE00007761, WBGENE00002218, WBGENE00001596, WBGENE00010369, WBGENE00000939,…	337	1126	8309	1.79554	3.65737e-05	4.06381e-06	0.000103385
GOTERM_MF_FAT	GO:0017076~purine nucleotide binding	82	10.3275	7.44477e-08	WBGENE00018898, WBGENE00001134, WBGENE00003821, WBGENE00003389, WBGENE00001872, WBGENE00003596, WBGENE00006961, WBGENE00004874, WBGENE00004873, WBGENE00017050, WBGENE00020781, WBGENE00012726, WBGENE00004879, WBGENE00011299, WBGENE00014004, WBGENE00012650, WBGENE00011771, WBGENE00000226, WBGENE00019334, WBGENE00003396, WBGENE00007761, WBGENE00002218, WBGENE00001596, WBGENE00010369, WBGENE00000939,…	337	1127	8309	1.79394	3.80421e-05	3.80427e-06	0.000107536
GOTERM_MF_FAT	GO:0000166~nucleotide binding	101	12.7204	1.21363e-09	WBGENE00003389, WBGENE00003821, WBGENE00001134, WBGENE00003596, WBGENE00001872, WBGENE00003827, WBGENE00020781, WBGENE00012726, WBGENE00011299, WBGENE00012650, WBGENE00000226, WBGENE00007761, WBGENE00003396, WBGENE00015581, WBGENE00000939, WBGENE00001860, WBGENE00000409, WBGENE00000935, WBGENE00015203, WBGENE00009944, WBGENE00012337, WBGENE00020263, WBGENE00195093, WBGENE00018890, WBGENE00004800,…	337	1395	8309	1.78511	6.20163e-07	8.85947e-08	1.75302e-06
GOTERM_MF_FAT	GO:1901265~nucleoside phosphate binding	101	12.7204	1.21363e-09	WBGENE00003389, WBGENE00003821, WBGENE00001134, WBGENE00003596, WBGENE00001872, WBGENE00003827, WBGENE00020781, WBGENE00012726, WBGENE00011299, WBGENE00012650, WBGENE00000226, WBGENE00007761, WBGENE00003396, WBGENE00015581, WBGENE00000939, WBGENE00001860, WBGENE00000409, WBGENE00000935, WBGENE00015203, WBGENE00009944, WBGENE00012337, WBGENE00020263, WBGENE00195093, WBGENE00018890, WBGENE00004800,…	337	1395	8309	1.78511	6.20163e-07	8.85947e-08	1.75302e-06
GOTERM_MF_FAT	GO:0035639~purine ribonucleoside triphosphate binding	81	10.2015	1.16183e-07	WBGENE00018898, WBGENE00001134, WBGENE00003821, WBGENE00003389, WBGENE00001872, WBGENE00003596, WBGENE00006961, WBGENE00004874, WBGENE00004873, WBGENE00017050, WBGENE00020781, WBGENE00012726, WBGENE00004879, WBGENE00011299, WBGENE00014004, WBGENE00012650, WBGENE00011771, WBGENE00000226, WBGENE00019334, WBGENE00003396, WBGENE00007761, WBGENE00002218, WBGENE00001596, WBGENE00010369, WBGENE00000939,…	337	1119	8309	1.78474	5.93678e-05	5.39722e-06	0.00016782
GOTERM_MF_FAT	GO:0032550~purine ribonucleoside binding	81	10.2015	1.16183e-07	WBGENE00018898, WBGENE00001134, WBGENE00003821, WBGENE00003389, WBGENE00001872, WBGENE00003596, WBGENE00006961, WBGENE00004874, WBGENE00004873, WBGENE00017050, WBGENE00020781, WBGENE00012726, WBGENE00004879, WBGENE00011299, WBGENE00014004, WBGENE00012650, WBGENE00011771, WBGENE00000226, WBGENE00019334, WBGENE00003396, WBGENE00007761, WBGENE00002218, WBGENE00001596, WBGENE00010369, WBGENE00000939,…	337	1119	8309	1.78474	5.93678e-05	5.39722e-06	0.00016782
GOTERM_MF_FAT	GO:0001883~purine nucleoside binding	81	10.2015	1.16183e-07	WBGENE00018898, WBGENE00001134, WBGENE00003821, WBGENE00003389, WBGENE00001872, WBGENE00003596, WBGENE00006961, WBGENE00004874, WBGENE00004873, WBGENE00017050, WBGENE00020781, WBGENE00012726, WBGENE00004879, WBGENE00011299, WBGENE00014004, WBGENE00012650, WBGENE00011771, WBGENE00000226, WBGENE00019334, WBGENE00003396, WBGENE00007761, WBGENE00002218, WBGENE00001596, WBGENE00010369, WBGENE00000939,…	337	1119	8309	1.78474	5.93678e-05	5.39722e-06	0.00016782
GOTERM_MF_FAT	GO:0032549~ribonucleoside binding	81	10.2015	1.30496e-07	WBGENE00018898, WBGENE00001134, WBGENE00003821, WBGENE00003389, WBGENE00001872, WBGENE00003596, WBGENE00006961, WBGENE00004874, WBGENE00004873, WBGENE00017050, WBGENE00020781, WBGENE00012726, WBGENE00004879, WBGENE00011299, WBGENE00014004, WBGENE00012650, WBGENE00011771, WBGENE00000226, WBGENE00019334, WBGENE00003396, WBGENE00007761, WBGENE00002218, WBGENE00001596, WBGENE00010369, WBGENE00000939,…	337	1122	8309	1.77996	6.66815e-05	5.55696e-06	0.000188495
GOTERM_MF_FAT	GO:0001882~nucleoside binding	81	10.2015	1.3563e-07	WBGENE00018898, WBGENE00001134, WBGENE00003821, WBGENE00003389, WBGENE00001872, WBGENE00003596, WBGENE00006961, WBGENE00004874, WBGENE00004873, WBGENE00017050, WBGENE00020781, WBGENE00012726, WBGENE00004879, WBGENE00011299, WBGENE00014004, WBGENE00012650, WBGENE00011771, WBGENE00000226, WBGENE00019334, WBGENE00003396, WBGENE00007761, WBGENE00002218, WBGENE00001596, WBGENE00010369, WBGENE00000939,…	337	1123	8309	1.77838	6.93043e-05	4.95047e-06	0.00019591
GOTERM_MF_FAT	GO:0032553~ribonucleotide binding	82	10.3275	1.33209e-07	WBGENE00018898, WBGENE00001134, WBGENE00003821, WBGENE00003389, WBGENE00001872, WBGENE00003596, WBGENE00006961, WBGENE00004874, WBGENE00004873, WBGENE00017050, WBGENE00020781, WBGENE00012726, WBGENE00004879, WBGENE00011299, WBGENE00014004, WBGENE00012650, WBGENE00011771, WBGENE00000226, WBGENE00019334, WBGENE00003396, WBGENE00007761, WBGENE00002218, WBGENE00001596, WBGENE00010369, WBGENE00000939,…	337	1142	8309	1.77038	6.80674e-05	5.23612e-06	0.000192413
GOTERM_MF_FAT	GO:0036094~small molecule binding	101	12.7204	5.39233e-09	WBGENE00003389, WBGENE00003821, WBGENE00001134, WBGENE00003596, WBGENE00001872, WBGENE00003827, WBGENE00020781, WBGENE00012726, WBGENE00011299, WBGENE00012650, WBGENE00000226, WBGENE00007761, WBGENE00003396, WBGENE00015581, WBGENE00000939, WBGENE00001860, WBGENE00000409, WBGENE00000935, WBGENE00015203, WBGENE00009944, WBGENE00012337, WBGENE00020263, WBGENE00195093, WBGENE00018890, WBGENE00004800,…	337	1433	8309	1.73778	2.75547e-06	3.44435e-07	7.78893e-06
GOTERM_MF_FAT	GO:0003677~DNA binding	64	8.06045	1.20093e-05	WBGENE00001029, WBGENE00019004, WBGENE00001872, WBGENE00006961, WBGENE00001974, WBGENE00015091, WBGENE00012584, WBGENE00000226, WBGENE00004333, WBGENE00019334, WBGENE00000537, WBGENE00011636, WBGENE00015296, WBGENE00006618, WBGENE00018355, WBGENE00001470, WBGENE00010369, WBGENE00000939, WBGENE00001860, WBGENE00016391, WBGENE00006382, WBGENE00019884, WBGENE00015638, WBGENE00004134, WBGENE00004319,…	337	914	8309	1.72644	0.006118	0.000383476	0.0173454
GOTERM_MF_FAT	GO:1901363~heterocyclic compound binding	199	25.063	2.61037e-20	WBGENE00003821, WBGENE00015091, WBGENE00003827, WBGENE00012726, WBGENE00016154, WBGENE00000537, WBGENE00015296, WBGENE00021311, WBGENE00018355, WBGENE00006618, WBGENE00015581, WBGENE00000939, WBGENE00000409, WBGENE00000935, WBGENE00009163, WBGENE00007433, WBGENE00009944, WBGENE00012337, WBGENE00195093, WBGENE00022830, WBGENE00018890, WBGENE00004800, WBGENE00010629, WBGENE00044329, WBGENE00013869,…	337	2899	8309	1.69248	1.3339e-17	1.3339e-17	3.77055e-17
GOTERM_MF_FAT	GO:0097159~organic cyclic compound binding	199	25.063	4.66729e-20	WBGENE00003821, WBGENE00015091, WBGENE00003827, WBGENE00012726, WBGENE00016154, WBGENE00000537, WBGENE00015296, WBGENE00021311, WBGENE00018355, WBGENE00006618, WBGENE00015581, WBGENE00000939, WBGENE00000409, WBGENE00000935, WBGENE00009163, WBGENE00007433, WBGENE00009944, WBGENE00012337, WBGENE00195093, WBGENE00022830, WBGENE00018890, WBGENE00004800, WBGENE00010629, WBGENE00044329, WBGENE00013869,…	337	2912	8309	1.68492	2.38499e-17	1.19249e-17	6.74166e-17
GOTERM_MF_FAT	GO:0097367~carbohydrate derivative binding	83	10.4534	9.84881e-07	WBGENE00018898, WBGENE00001134, WBGENE00003821, WBGENE00003389, WBGENE00001872, WBGENE00003596, WBGENE00006961, WBGENE00004874, WBGENE00004873, WBGENE00017050, WBGENE00020781, WBGENE00012726, WBGENE00004879, WBGENE00011299, WBGENE00014004, WBGENE00012650, WBGENE00011771, WBGENE00000226, WBGENE00019334, WBGENE00003396, WBGENE00002218, WBGENE00007761, WBGENE00001596, WBGENE00010369, WBGENE00000939,…	337	1217	8309	1.68154	0.000503148	3.35511e-05	0.0014226

## Sheet: CC_control_down
Category	Term	Count	X.	PValue	Genes	List.Total	Pop.Hits	Pop.Total	Fold.Enrichment	Bonferroni	Benjamini	FDR
GOTERM_CC_FAT	GO:0000803~sex chromosome	6	0.755668	1.78633e-05	WBGENE00004747, WBGENE00001085, WBGENE00003367, WBGENE00003222, WBGENE00001867, WBGENE00009254	223	9	5006	14.9656	0.00603742	0.000756679	0.0243125
GOTERM_CC_FAT	GO:0000794~condensed nuclear chromosome	19	2.39295	2.48449e-12	WBGENE00003912, WBGENE00006375, WBGENE00011600, WBGENE00011601, WBGENE00001214, WBGENE00010056, WBGENE00001997, WBGENE00004873, WBGENE00011597, WBGENE00001867, WBGENE00004296, WBGENE00001085, WBGENE00019247, WBGENE00000226, WBGENE00004333, WBGENE00016151, WBGENE00003421, WBGENE00003576, WBGENE00019432	223	52	5006	8.20231	8.42231e-10	2.10558e-10	3.38181e-09
GOTERM_CC_FAT	GO:0000793~condensed chromosome	29	3.65239	1.75403e-15	WBGENE00006375, WBGENE00001214, WBGENE00003367, WBGENE00001997, WBGENE00004874, WBGENE00004873, WBGENE00019247, WBGENE00000226, WBGENE00004333, WBGENE00016151, WBGENE00003421, WBGENE00019432, WBGENE00006975, WBGENE00001864, WBGENE00003912, WBGENE00001829, WBGENE00011600, WBGENE00001860, WBGENE00002231, WBGENE00011601, WBGENE00010056, WBGENE00007694, WBGENE00011597, WBGENE00003210, WBGENE00001867,…	223	103	5006	6.32043	6.02185e-13	3.01092e-13	2.42029e-12
GOTERM_CC_FAT	GO:0000228~nuclear chromosome	32	4.03023	8.27566e-14	WBGENE00004800, WBGENE00011415, WBGENE00006375, WBGENE00001872, WBGENE00001214, WBGENE00001997, WBGENE00004873, WBGENE00003222, WBGENE00004117, WBGENE00019247, WBGENE00000226, WBGENE00000592, WBGENE00004333, WBGENE00016151, WBGENE00003421, WBGENE00019432, WBGENE00021311, WBGENE00003912, WBGENE00006944, WBGENE00011600, WBGENE00001860, WBGENE00011601, WBGENE00010056, WBGENE00011597, WBGENE00001867,…	223	146	5006	4.9202	2.80392e-11	9.34641e-12	1.12588e-10
GOTERM_CC_FAT	GO:0098687~chromosomal region	16	2.01511	8.02402e-07	WBGENE00004800, WBGENE00003912, WBGENE00011451, WBGENE00001829, WBGENE00006944, WBGENE00002231, WBGENE00003367, WBGENE00004874, WBGENE00003210, WBGENE00016381, WBGENE00001869, WBGENE00004296, WBGENE00000520, WBGENE00000537, WBGENE00003576, WBGENE00019432	223	76	5006	4.72599	0.000271978	4.53347e-05	0.00109221
GOTERM_CC_FAT	GO:0005694~chromosome	52	6.54912	2.71376e-17	WBGENE00001872, WBGENE00001974, WBGENE00004874, WBGENE00004873, WBGENE00016381, WBGENE00004117, WBGENE00019247, WBGENE00000226, WBGENE00004333, WBGENE00019334, WBGENE00000537, WBGENE00016151, WBGENE00019432, WBGENE00021311, WBGENE00001864, WBGENE00001829, WBGENE00001860, WBGENE00002231, WBGENE00011597, WBGENE00001867, WBGENE00001869, WBGENE00004747, WBGENE00001085, WBGENE00004746, WBGENE00004322,…	223	312	5006	3.74141	9.19965e-15	9.19965e-15	3.69393e-14
GOTERM_CC_FAT	GO:0044454~nuclear chromosome part	17	2.14106	1.74267e-05	WBGENE00004800, WBGENE00006375, WBGENE00011415, WBGENE00006944, WBGENE00001860, WBGENE00001997, WBGENE00004873, WBGENE00006732, WBGENE00004296, WBGENE00006595, WBGENE00004117, WBGENE00019247, WBGENE00000520, WBGENE00004333, WBGENE00003421, WBGENE00019432, WBGENE00003576	223	108	5006	3.53355	0.00589029	0.000843602	0.0237184
GOTERM_CC_FAT	GO:0044427~chromosomal part	36	4.53401	8.57375e-11	WBGENE00004800, WBGENE00011451, WBGENE00011415, WBGENE00006375, WBGENE00003367, WBGENE00001997, WBGENE00004874, WBGENE00004873, WBGENE00016381, WBGENE00004117, WBGENE00019247, WBGENE00004333, WBGENE00000537, WBGENE00016151, WBGENE00003421, WBGENE00019432, WBGENE00006975, WBGENE00003912, WBGENE00001829, WBGENE00006944, WBGENE00001860, WBGENE00002231, WBGENE00010056, WBGENE00004337, WBGENE00007694,…	223	234	5006	3.4536	2.9065e-08	5.813e-09	1.16705e-07

## Sheet: BP_nsun1_up
Category	Term	Count	X.	PValue	Genes	List.Total	Pop.Hits	Pop.Total	Fold.Enrichment	Bonferroni	Benjamini	FDR
GOTERM_BP_FAT	GO:0006955~immune response	38	6.69014	5.45758e-12	WBGENE00008988, WBGENE00008199, WBGENE00008486, WBGENE00015574, WBGENE00004809, WBGENE00008239, WBGENE00018694, WBGENE00017262, WBGENE00007440, WBGENE00015716, WBGENE00018823, WBGENE00010050, WBGENE00018216, WBGENE00019411, WBGENE00009393, WBGENE00010745, WBGENE00004196, WBGENE00014252, WBGENE00009432, WBGENE00020658, WBGENE00010019, WBGENE00009165, WBGENE00012101, WBGENE00015932, WBGENE00015933,…	328	320	10368	3.75366	8.56303e-09	8.56303e-09	9.11738e-09
GOTERM_BP_FAT	GO:0045087~innate immune response	37	6.51408	1.14715e-11	WBGENE00008988, WBGENE00008199, WBGENE00015574, WBGENE00008486, WBGENE00004809, WBGENE00008239, WBGENE00018694, WBGENE00017262, WBGENE00007440, WBGENE00015716, WBGENE00018823, WBGENE00010050, WBGENE00018216, WBGENE00019411, WBGENE00009393, WBGENE00010745, WBGENE00004196, WBGENE00014252, WBGENE00009432, WBGENE00020658, WBGENE00010019, WBGENE00009165, WBGENE00012101, WBGENE00015932, WBGENE00015933,…	328	312	10368	3.74859	1.79988e-08	8.99938e-09	1.9164e-08
GOTERM_BP_FAT	GO:0009755~hormone-mediated signaling pathway	29	5.10563	2.33006e-08	WBGENE00020460, WBGENE00003603, WBGENE00003624, WBGENE00003625, WBGENE00003626, WBGENE00003694, WBGENE00008239, WBGENE00003607, WBGENE00020153, WBGENE00020152, WBGENE00003710, WBGENE00018415, WBGENE00003632, WBGENE00003615, WBGENE00021611, WBGENE00003634, WBGENE00003659, WBGENE00013976, WBGENE00003658, WBGENE00008830, WBGENE00003680, WBGENE00003660, WBGENE00011002, WBGENE00003696, WBGENE00003705,…	328	268	10368	3.42046	3.6558e-05	9.13961e-06	3.89253e-05
GOTERM_BP_FAT	GO:0048545~response to steroid hormone	28	4.92958	6.53567e-08	WBGENE00020460, WBGENE00003603, WBGENE00003624, WBGENE00003625, WBGENE00003626, WBGENE00003694, WBGENE00003607, WBGENE00020153, WBGENE00020152, WBGENE00003710, WBGENE00018415, WBGENE00003632, WBGENE00003615, WBGENE00021611, WBGENE00003634, WBGENE00003659, WBGENE00013976, WBGENE00003658, WBGENE00008830, WBGENE00003680, WBGENE00003660, WBGENE00011002, WBGENE00003696, WBGENE00003705, WBGENE00003699,…	328	264	10368	3.35255	0.000102539	2.05087e-05	0.000109183
GOTERM_BP_FAT	GO:0071383~cellular response to steroid hormone stimulus	28	4.92958	6.53567e-08	WBGENE00020460, WBGENE00003603, WBGENE00003624, WBGENE00003625, WBGENE00003626, WBGENE00003694, WBGENE00003607, WBGENE00020153, WBGENE00020152, WBGENE00003710, WBGENE00018415, WBGENE00003632, WBGENE00003615, WBGENE00021611, WBGENE00003634, WBGENE00003659, WBGENE00013976, WBGENE00003658, WBGENE00008830, WBGENE00003680, WBGENE00003660, WBGENE00011002, WBGENE00003696, WBGENE00003705, WBGENE00003699,…	328	264	10368	3.35255	0.000102539	2.05087e-05	0.000109183
GOTERM_BP_FAT	GO:0043401~steroid hormone mediated signaling pathway	28	4.92958	6.53567e-08	WBGENE00020460, WBGENE00003603, WBGENE00003624, WBGENE00003625, WBGENE00003626, WBGENE00003694, WBGENE00003607, WBGENE00020153, WBGENE00020152, WBGENE00003710, WBGENE00018415, WBGENE00003632, WBGENE00003615, WBGENE00021611, WBGENE00003634, WBGENE00003659, WBGENE00013976, WBGENE00003658, WBGENE00008830, WBGENE00003680, WBGENE00003660, WBGENE00011002, WBGENE00003696, WBGENE00003705, WBGENE00003699,…	328	264	10368	3.35255	0.000102539	2.05087e-05	0.000109183
GOTERM_BP_FAT	GO:0071396~cellular response to lipid	28	4.92958	6.53567e-08	WBGENE00020460, WBGENE00003603, WBGENE00003624, WBGENE00003625, WBGENE00003626, WBGENE00003694, WBGENE00003607, WBGENE00020153, WBGENE00020152, WBGENE00003710, WBGENE00018415, WBGENE00003632, WBGENE00003615, WBGENE00021611, WBGENE00003634, WBGENE00003659, WBGENE00013976, WBGENE00003658, WBGENE00008830, WBGENE00003680, WBGENE00003660, WBGENE00011002, WBGENE00003696, WBGENE00003705, WBGENE00003699,…	328	264	10368	3.35255	0.000102539	2.05087e-05	0.000109183
GOTERM_BP_FAT	GO:0033993~response to lipid	28	4.92958	7.64942e-08	WBGENE00020460, WBGENE00003603, WBGENE00003624, WBGENE00003625, WBGENE00003626, WBGENE00003694, WBGENE00003607, WBGENE00020153, WBGENE00020152, WBGENE00003710, WBGENE00018415, WBGENE00003632, WBGENE00003615, WBGENE00021611, WBGENE00003634, WBGENE00003659, WBGENE00013976, WBGENE00003658, WBGENE00008830, WBGENE00003680, WBGENE00003660, WBGENE00011002, WBGENE00003696, WBGENE00003705, WBGENE00003699,…	328	266	10368	3.32734	0.000120012	2.0003e-05	0.000127789
GOTERM_BP_FAT	GO:0032870~cellular response to hormone stimulus	29	5.10563	1.67796e-07	WBGENE00020460, WBGENE00003603, WBGENE00003624, WBGENE00003625, WBGENE00003626, WBGENE00003694, WBGENE00008239, WBGENE00003607, WBGENE00020153, WBGENE00020152, WBGENE00003710, WBGENE00018415, WBGENE00003632, WBGENE00003615, WBGENE00021611, WBGENE00003634, WBGENE00003659, WBGENE00013976, WBGENE00003658, WBGENE00008830, WBGENE00003680, WBGENE00003660, WBGENE00011002, WBGENE00003696, WBGENE00003705,…	328	294	10368	3.11797	0.000263237	3.76096e-05	0.000280315
GOTERM_BP_FAT	GO:0009725~response to hormone	29	5.10563	1.67796e-07	WBGENE00020460, WBGENE00003603, WBGENE00003624, WBGENE00003625, WBGENE00003626, WBGENE00003694, WBGENE00008239, WBGENE00003607, WBGENE00020153, WBGENE00020152, WBGENE00003710, WBGENE00018415, WBGENE00003632, WBGENE00003615, WBGENE00021611, WBGENE00003634, WBGENE00003659, WBGENE00013976, WBGENE00003658, WBGENE00008830, WBGENE00003680, WBGENE00003660, WBGENE00011002, WBGENE00003696, WBGENE00003705,…	328	294	10368	3.11797	0.000263237	3.76096e-05	0.000280315
GOTERM_BP_FAT	GO:0006952~defense response	44	7.74648	4.48244e-11	WBGENE00008988, WBGENE00008199, WBGENE00003368, WBGENE00008486, WBGENE00015574, WBGENE00004809, WBGENE00008239, WBGENE00006810, WBGENE00018694, WBGENE00002187, WBGENE00017262, WBGENE00007440, WBGENE00015716, WBGENE00018823, WBGENE00015981, WBGENE00010050, WBGENE00018216, WBGENE00019411, WBGENE00009393, WBGENE00010745, WBGENE00004196, WBGENE00014252, WBGENE00009432, WBGENE00020658, WBGENE00010019,…	328	447	10368	3.11147	7.03294e-08	2.34431e-08	7.48824e-08
GOTERM_BP_FAT	GO:0071407~cellular response to organic cyclic compound	28	4.92958	3.61916e-07	WBGENE00020460, WBGENE00003603, WBGENE00003624, WBGENE00003625, WBGENE00003626, WBGENE00003694, WBGENE00003607, WBGENE00020153, WBGENE00020152, WBGENE00003710, WBGENE00018415, WBGENE00003632, WBGENE00003615, WBGENE00021611, WBGENE00003634, WBGENE00003659, WBGENE00013976, WBGENE00003658, WBGENE00008830, WBGENE00003680, WBGENE00003660, WBGENE00011002, WBGENE00003696, WBGENE00003705, WBGENE00003699,…	328	287	10368	3.08388	0.000567685	6.30921e-05	0.000604606
GOTERM_BP_FAT	GO:0014070~response to organic cyclic compound	29	5.10563	3.60508e-07	WBGENE00020460, WBGENE00003603, WBGENE00003624, WBGENE00003625, WBGENE00003626, WBGENE00003694, WBGENE00003607, WBGENE00020153, WBGENE00020152, WBGENE00003710, WBGENE00018415, WBGENE00003632, WBGENE00003615, WBGENE00021611, WBGENE00003634, WBGENE00003659, WBGENE00013976, WBGENE00003658, WBGENE00008830, WBGENE00003680, WBGENE00003660, WBGENE00011002, WBGENE00003696, WBGENE00003705, WBGENE00003699,…	328	305	10368	3.00552	0.000565478	7.07022e-05	0.000602254
GOTERM_BP_FAT	GO:0071495~cellular response to endogenous stimulus	30	5.28169	6.63846e-07	WBGENE00020460, WBGENE00003603, WBGENE00003624, WBGENE00003625, WBGENE00003626, WBGENE00003694, WBGENE00008239, WBGENE00003607, WBGENE00020153, WBGENE00020152, WBGENE00003710, WBGENE00018415, WBGENE00003632, WBGENE00003615, WBGENE00021611, WBGENE00003634, WBGENE00003659, WBGENE00013976, WBGENE00003658, WBGENE00008830, WBGENE00003680, WBGENE00003660, WBGENE00011002, WBGENE00003696, WBGENE00003705,…	328	333	10368	2.84773	0.00104103	0.000104152	0.001109
GOTERM_BP_FAT	GO:0009719~response to endogenous stimulus	31	5.45775	7.16183e-07	WBGENE00020460, WBGENE00003603, WBGENE00003624, WBGENE00003625, WBGENE00003626, WBGENE00003694, WBGENE00008239, WBGENE00003607, WBGENE00020153, WBGENE00020152, WBGENE00003710, WBGENE00003632, WBGENE00018415, WBGENE00003615, WBGENE00021611, WBGENE00003634, WBGENE00003659, WBGENE00013976, WBGENE00003658, WBGENE00008830, WBGENE00003680, WBGENE00003660, WBGENE00011002, WBGENE00003696, WBGENE00003705,…	328	353	10368	2.77593	0.00112306	0.000102149	0.00119643

## Sheet: MF_nsun1_up
Category	Term	Count	X.	PValue	Genes	List.Total	Pop.Hits	Pop.Total	Fold.Enrichment	Bonferroni	Benjamini	FDR
GOTERM_MF_FAT	GO:0003700~transcription factor activity, sequence-specific DNA binding	38	6.69014	9.38637e-06	WBGENE00020460, WBGENE00007776, WBGENE00003603, WBGENE00003624, WBGENE00003625, WBGENE00003626, WBGENE00001851, WBGENE00003694, WBGENE00000437, WBGENE00003607, WBGENE00020153, WBGENE00015981, WBGENE00020152, WBGENE00003710, WBGENE00011824, WBGENE00003632, WBGENE00018415, WBGENE00003615, WBGENE00021611, WBGENE00003634, WBGENE00003659, WBGENE00013976, WBGENE00001208, WBGENE00003658, WBGENE00000448,…	283	513	8309	2.17485	0.00474761	0.00237663	0.0135423
GOTERM_MF_FAT	GO:0001071~nucleic acid binding transcription factor activity	38	6.69014	9.38637e-06	WBGENE00020460, WBGENE00007776, WBGENE00003603, WBGENE00003624, WBGENE00003625, WBGENE00003626, WBGENE00001851, WBGENE00003694, WBGENE00000437, WBGENE00003607, WBGENE00020153, WBGENE00015981, WBGENE00020152, WBGENE00003710, WBGENE00011824, WBGENE00003632, WBGENE00018415, WBGENE00003615, WBGENE00021611, WBGENE00003634, WBGENE00003659, WBGENE00013976, WBGENE00001208, WBGENE00003658, WBGENE00000448,…	283	513	8309	2.17485	0.00474761	0.00237663	0.0135423
GOTERM_MF_FAT	GO:0008270~zinc ion binding	50	8.80282	9.24163e-06	WBGENE00020460, WBGENE00003603, WBGENE00003694, WBGENE00003607, WBGENE00021495, WBGENE00009595, WBGENE00016190, WBGENE00015981, WBGENE00020153, WBGENE00020152, WBGENE00008521, WBGENE00010545, WBGENE00018415, WBGENE00003615, WBGENE00021611, WBGENE00000298, WBGENE00020658, WBGENE00018769, WBGENE00003659, WBGENE00006826, WBGENE00003658, WBGENE00008830, WBGENE00003660, WBGENE00003696, WBGENE00011002,…	283	768	8309	1.91149	0.00467457	0.00467457	0.0133335
GOTERM_MF_FAT	GO:0046914~transition metal ion binding	55	9.6831	2.86399e-05	WBGENE00020460, WBGENE00003603, WBGENE00003694, WBGENE00003607, WBGENE00021495, WBGENE00009595, WBGENE00016190, WBGENE00010705, WBGENE00015981, WBGENE00020153, WBGENE00020152, WBGENE00008521, WBGENE00010545, WBGENE00018415, WBGENE00003615, WBGENE00018769, WBGENE00000298, WBGENE00021611, WBGENE00020658, WBGENE00003659, WBGENE00003658, WBGENE00006826, WBGENE00008830, WBGENE00020556, WBGENE00003660,…	283	915	8309	1.76483	0.0144157	0.00482852	0.0413154

## Sheet: CC_nsun1_up
Category	Term	Count	X.	PValue	Genes	List.Total	Pop.Hits	Pop.Total	Fold.Enrichment	Bonferroni	Benjamini	FDR
GOTERM_CC_FAT	GO:0005615~extracellular space	24	4.22535	6.23058e-06	WBGENE00017688, WBGENE00019477, WBGENE00020516, WBGENE00020373, WBGENE00000789, WBGENE00012184, WBGENE00007304, WBGENE00011561, WBGENE00001578, WBGENE00019203, WBGENE00000035, WBGENE00009347, WBGENE00012382, WBGENE00009162, WBGENE00007692, WBGENE00020335, WBGENE00018533, WBGENE00022515, WBGENE00004890, WBGENE00023485, WBGENE00010539, WBGENE00017600, WBGENE00008341, WBGENE00008521	165	253	5006	2.87805	0.00158132	0.000790973	0.00811403
GOTERM_CC_FAT	GO:0044421~extracellular region part	25	4.40141	2.56666e-05	WBGENE00017688, WBGENE00019477, WBGENE00000789, WBGENE00012184, WBGENE00019203, WBGENE00000035, WBGENE00009347, WBGENE00011437, WBGENE00008341, WBGENE00008521, WBGENE00020516, WBGENE00020373, WBGENE00007304, WBGENE00001578, WBGENE00011561, WBGENE00007692, WBGENE00009162, WBGENE00012382, WBGENE00020335, WBGENE00018533, WBGENE00022515, WBGENE00004890, WBGENE00010539, WBGENE00023485, WBGENE00017600	165	295	5006	2.57114	0.00649819	0.00217077	0.0334214
GOTERM_CC_FAT	GO:0005576~extracellular region	41	7.21831	6.21495e-07	WBGENE00017688, WBGENE00017970, WBGENE00007458, WBGENE00019477, WBGENE00002255, WBGENE00000789, WBGENE00012184, WBGENE00000035, WBGENE00019203, WBGENE00009347, WBGENE00013514, WBGENE00011437, WBGENE00002090, WBGENE00008341, WBGENE00016642, WBGENE00008521, WBGENE00000283, WBGENE00020516, WBGENE00015393, WBGENE00020373, WBGENE00015510, WBGENE00007304, WBGENE00011166, WBGENE00001578, WBGENE00011561,…	165	551	5006	2.25756	0.000157847	0.000157847	0.000809394

## Sheet: BP_nsun1_down
Category	Term	Count	X.	PValue	Genes	List.Total	Pop.Hits	Pop.Total	Fold.Enrichment	Bonferroni	Benjamini	FDR
GOTERM_BP_FAT	GO:0009792~embryo development ending in birth or egg hatching	188	18.7065	1.65045e-08	WBGENE00002063, WBGENE00000184, WBGENE00011986, WBGENE00007626, WBGENE00013208, WBGENE00009054, WBGENE00006391, WBGENE00016816, WBGENE00013095, WBGENE00003827, WBGENE00015976, WBGENE00015807, WBGENE00012675, WBGENE00001933, WBGENE00012650, WBGENE00018669, WBGENE00001934, WBGENE00021687, WBGENE00001935, WBGENE00001936, WBGENE00001734, WBGENE00001938, WBGENE00012678, WBGENE00003044, WBGENE00006731,…	469	2930	10368	1.41844	2.70175e-05	2.70175e-05	2.77126e-05
GOTERM_BP_FAT	GO:0009790~embryo development	190	18.9055	4.16889e-08	WBGENE00002063, WBGENE00000184, WBGENE00011986, WBGENE00007626, WBGENE00013208, WBGENE00009054, WBGENE00006391, WBGENE00016816, WBGENE00013095, WBGENE00003827, WBGENE00015976, WBGENE00015807, WBGENE00012675, WBGENE00001933, WBGENE00012650, WBGENE00018669, WBGENE00001934, WBGENE00021687, WBGENE00001935, WBGENE00001936, WBGENE00001734, WBGENE00001938, WBGENE00012678, WBGENE00003044, WBGENE00006731,…	469	3004	10368	1.39822	6.82423e-05	3.41218e-05	6.99997e-05

[truncated: 2 more sheets: MF_nsun1_down, CC_nsun1_down]
