# Supplementary material for: The ribosomal RNA m5C methyltransferase NSUN-1 modulates healthspan and oogenesis in Caenorhabditis elegans
Source: eLife. 2020 Dec 8;9:e56205. doi: 10.7554/eLife.56205 (PMC7746234; doi:10.7554/eLife.56205)
Supplement: Supplementary file 1. [file elife-56205-supp1.xlsx]

## Sheet: Tabelle1
Primer name	Sequcence (5' - 3')
tm6081_genotyping_forw	GGATTTTCTGTGCAAAAACGGCA
tm6081_genotyping_rev	GCCAAGCAACAATAGGCTCA
nsun-1_qPCR_forw	TCGCCGAGATCCACAGAAAT
nsun-1_qPCR_rev	CCACGTTCATTCCACGGTTG
nsun-2_qPCR_forw	GCTTAAACGAGAGACGGGAGTT
nsun-2_qPCR_rev	CACCAGTATCCTGGGCGTG
nsun-4_qPCR_forw	TGTTGGATATGTGTGCGGCT
nsun-4_qPCR_rev	GCGTCCTTGCGTTTTAGGAC
nsun-5_qPCR_forw	GGCCAAGGAGAAAAGTGTG
nsun-5_qPCR_rev	GATCCACCGATATTCGCAT
act-1_qPCR_forw	CTACGAACTTCCTGACGGACAAG
act-1_qPCR_rev	CCGGCGGACTCCATACC
tba-1_qPCR_forw	TCAACACTGCCATCGCCGCC
tba-1_qPCR_rev	TCCAAGCGAGACCAGGCTTCAG
col-94_qPCR_forw	ACACCTCATCTGAAAATGGACG
col-94_qPCR_rev	CACAGCGAGAAAACTGCGAC
F20D12.12_qPCR_forw	ATCGAGGGAAATTGCACGGA
F20D12.12_qPCR_rev	TTGTCATGAAAACGGAAGAATTTGG
fbxa-77_qPCR_forw	TATTCGCATTGCCGAGTGGA
fbxa-77_qPCR_rev	TCAGCATCCCAAAACACTGAG
cpg-7_qPCR_forw	CTGTGTCGCTGTCCCAATCT
cpg-7_qPCR_rev	TCAACGGCTTCCTTGTCTCC
psf-2_qPCR_forw	TCGCCGGAAACTCGCTTATT
psf-2_qPCR_rev	CTGGAATCCGACAGGGTACG
K08D8.11_qPCR_forw	TGGAACCACAGGCTCCTAAT
K08D8.11_qPCR_rev	AGTTGGCGGAGAAACGTTATTTG
hpo-21 _qPCR_forw	CGGATGGACGGAATCGCATA
hpo-21 _qPCR_rev	CTTTGGGAACGGCTCGTAGT
C31H2.14_qPCR_forw	TTTATGCAGAAGGCGAGCCA
C31H2.14_qPCR_rev	GGAGCATTTCGTTTCGCTGG
Y54E10BL.3_qPCR_forw	TCTTCAACGCTTTTCGCAGC
Y54E10BL.3_qPCR_rev	TCCATGTTTGACAGAGCCCC
F53B7.7_qPCR_forw	TGACGGTTCAGATTGTGCGA
F53B7.7_qPCR_rev	CTGTGCGAACACATACACGC
nspc-5_qPCR_forw	TGCTGTCTATGATGGTTCCT
nspc-5_qPCR_rev	GCTTGTTGCAACCACTAGTCT
nspc-7_qPCR_forw	ACCCTGACTTCAGATGCTGC
nspc-7_qPCR_rev	ACAGCAAAGTCCTTCTTTCACA
C08F11.12_qPCR_forw	ACCGAGTGCACGTATTCTGG
C08F11.12_qPCR_rev	CCGCACAGTCAACTGGTACA
nspc-1_qPCR_forw	TGTGCTGCTGTCTACGATGG
nspc-1_qPCR_rev	TTAAATATGTGCCACAACTGAAGAA
Y45F10C.2_qPCR_forw	GCGAGCCAGCCAAATGAAAA
Y45F10C.2_qPCR_rev	AGCTCACAGATCAGAAGTCCAA
vit-5_qPCR_forw	TCTCTCTGGACTCCCAACCG
vit-5_qPCR_rev	AGCTCACGTTGCTCCAAAGA
R10E4.7_qPCR_forw	TCCCATCGTATCCACAGGCA
R10E4.7_qPCR_rev	CTTCTTCCCCCACGATCTGC
nspc-16_qPCR_forw	CAGGTGTCAACGGTGGAGAA
nspc-16_qPCR_rev	TTCTTTGCGGGGAATGTTGC
nspc-13_qPCR_forw	ACCCTGACTTCAGATGCTGC
nspc-13_qPCR_rev	CGACAGAAAAACACAAGCGCA
COBRA_forw	GGGAGTAATTATGATTTTTCTAAGGTAG-
COBRA_rev	ATAATAAATAAAAACAATAAAAATCTCACTAATCCATTCATACAC
